# Supplementary material
Source: PubMed Central journal article supplement (PMC490039)
Supplement: plntcell_tpc.021162_1.pdf [file plntcell_tpc.021162_1.pdf]

|    | A        | B        | C               | D                                                            | E                                 | F                    | G     | H      | I                                    | J    | K           | L     |
|----|----------|----------|-----------------|--------------------------------------------------------------|-----------------------------------|----------------------|-------|--------|--------------------------------------|------|-------------|-------|
| 1  | Array ID | Clone ID | Kazusa clone ID | Putative function                                            | Organism                          | Normalized value (S) |       |        | Expression ratio (S/S <sub>0</sub> ) |      |             |       |
| 2  |          |          |                 |                                                              |                                   | C9-H                 | C9-L  | Lcr1-L | C9-L/C9-H                            | S.D. | C9-L/Lcr1-L | S.D.  |
| 3  | 028a01   | AV629533 | LCL060d11       | 1,4-alpha-D-glucan6-alpha-D-(1,4-alpha-D)-glucanotransferase | <i>Triticum aestivum</i>          | 2.5                  | 1.5   | 1.2    | 0.6                                  | 0.2  | 396.6       | 791.4 |
| 4  | 155a03   | AV631247 | LCL090h04       | 1,4-alpha-D-glucan6-alpha-D-(1,4-alpha-D)-glucanotransferase | <i>Triticum aestivum</i>          | 18.5                 | 32.0  | 19.7   | 1.8                                  | 0.5  | 1.8         | 0.7   |
| 5  | 164h12   | BP095000 | MXL034b06       | 1,4-alpha-glucan branching enzyme isoform SBE2.2 precursor   | <i>Arabidopsis thaliana</i>       | 13.7                 | 20.8  | 25.8   | 1.4                                  | 0.6  | 0.8         | 0.4   |
| 6  | 171f07   | BP098032 | MXL085f04       | 10 kD chaperonin, GroES                                      | <i>Arabidopsis thaliana</i>       | 56.9                 | 22.5  | 29.8   | 0.4                                  | 0.0  | 0.8         | 0.3   |
| 7  | 026f01   | AV628440 | LCL041h06       | 100 RNP protein                                              | <i>Spinacia oleracea</i>          | 1.5                  | 2.3   | 2.4    | 2.7                                  | 3.1  | 1.0         | 0.1   |
| 8  | 032h09   | BP093766 | MXL013d10       | 101 kDa heat shock protein                                   | <i>Nicotiana tabacum</i>          | 14.9                 | 13.5  | 16.9   | 0.9                                  | 0.1  | 1.1         | 0.8   |
| 9  | 036e09   | BP098382 | MXL092e05       | 101 kDa heat shock protein                                   | <i>Nicotiana tabacum</i>          | 24.7                 | 16.5  | 25.0   | 0.7                                  | 0.1  | 0.8         | 0.3   |
| 10 | 031a04   | BP086366 | MX007d04        | 1021 complete chromosome; segment 6/12                       | <i>Sinorhizobium meliloti</i>     | 41.5                 | 27.2  | 22.8   | 0.7                                  | 0.4  | 1.4         | 1.0   |
| 11 | 169e06   | BP097010 | MXL068f06       | 10-formyltetrahydrofolate synthetase                         | <i>Arabidopsis thaliana</i>       | 11.0                 | 51.1  | 49.9   | 4.8                                  | 1.4  | 1.1         | 0.2   |
| 12 | 118g10   | AV634260 | HC031b07        | 10-formyltetrahydrofolate synthetase                         | <i>Arabidopsis thaliana</i>       | 9.7                  | 18.6  | 26.5   | 2.1                                  | 0.9  | 0.7         | 0.1   |
| 13 | 157b05   | BP086603 | MX012f06        | 11 kD subunit of photosystem I, PsalH                        | <i>Chlamydomonas reinhardtii</i>  | 220.2                | 203.3 | 154.1  | 0.9                                  | 0.2  | 1.6         | 1.3   |
| 14 | 026e01   | AV628354 | LCL040e03       | 11 kDa outer arm dynein light chain                          | <i>Chlamydomonas reinhardtii</i>  | 14.8                 | 19.6  | 12.2   | 1.3                                  | 0.3  | 1.6         | 0.3   |
| 15 | 007g03   | AV392240 | CM059f07        | 14-3-3-like protein                                          | <i>Chlamydomonas reinhardtii</i>  | 108.8                | 129.4 | 112.9  | 1.3                                  | 0.6  | 1.3         | 0.5   |
| 16 | 007e05   | AV391835 | CM056g03        | 14-3-3-like protein                                          | <i>Chlamydomonas reinhardtii</i>  | 45.6                 | 53.5  | 58.7   | 1.2                                  | 0.2  | 1.0         | 0.2   |
| 17 | 17f004   | BP097506 | MXL077a05       | 146 kD nuclear protein                                       | <i>Xenopus laevis</i>             | 20.8                 | 16.4  | 18.5   | 0.8                                  | 0.2  | 1.0         | 0.6   |
| 18 | 006b01   | AV389191 | CM035d09        | 19S proteasome subunit 9                                     | <i>Arabidopsis thaliana</i>       | 16.8                 | 15.7  | 18.2   | 0.9                                  | 0.2  | 0.9         | 0.1   |
| 19 | 169a11   | BP096826 | MXL065e05       | 1-alpha dynein heavy chain                                   | <i>Chlamydomonas reinhardtii</i>  | 5.5                  | 8.4   | 3.9    | 1.7                                  | 0.6  | 3.5         | 2.5   |
| 20 | 166b05   | BP095474 | MXL042d05       | 1-alpha dynein heavy chain                                   | <i>Chlamydomonas reinhardtii</i>  | 2.7                  | 5.0   | 2.3    | 2.5                                  | 1.5  | 2.5         | 0.9   |
| 21 | 166d10   | BP095647 | MXL045b09       | 1-alpha dynein heavy chain                                   | <i>Chlamydomonas reinhardtii</i>  | 16.8                 | 13.4  | 14.5   | 0.8                                  | 0.2  | 1.0         | 0.3   |
| 22 | 167c08   | BP095974 | MXL050d01       | 1-alpha dynein heavy chain                                   | <i>Chlamydomonas reinhardtii</i>  | 3.7                  | 5.4   | 6.2    | 1.5                                  | 0.3  | 0.9         | 0.2   |
| 23 | 137c09   | AV386723 | CM008e07        | 1-alpha dynein heavy chain Dhc1                              | <i>Chlamydomonas reinhardtii</i>  | 38.3                 | 213.5 | 175.7  | 5.7                                  | 1.4  | 1.2         | 0.1   |
| 24 | 172h01   | BP098554 | MXL095d02       | 1-beta-dynein heavy chain                                    | <i>Chlamydomonas reinhardtii</i>  | 4.0                  | 4.8   | 4.4    | 1.0                                  | 0.6  | 1.2         | 1.1   |
| 25 | 159g10   | BP088108 | MX051g10        | 1-deoxy-D-xylulose 5-phosphate reductoisomerase              | <i>Arabidopsis thaliana</i>       | 21.5                 | 9.0   | 16.3   | 0.4                                  | 0.1  | 0.6         | 0.1   |
| 26 | 007b10   | AV391285 | CM052f08        | 1-deoxy-D-xylulose-5-phosphate synthase                      | <i>Chlamydomonas reinhardtii</i>  | 17.3                 | 16.2  | 17.3   | 0.9                                  | 0.3  | 0.9         | 0.2   |
| 27 | 107f11   | AV386940 | CM011g08        | 1-deoxy-D-xylulose-5-phosphate synthase                      | <i>Chlamydomonas reinhardtii</i>  | 12.7                 | 13.7  | 15.0   | 1.1                                  | 0.2  | 0.9         | 0.1   |
| 28 | 013b04   | AV638048 | HC081b11        | 1-hydroxy-2-gluthathionyl-2-methyl-3-butene dehydrogenase    | <i>Rhodococcus sp. AD45</i>       | 5.9                  | 5.1   | 5.8    | 0.9                                  | 0.2  | 0.9         | 0.1   |
| 29 | 104b07   | AV397797 | CL45c11         | 2 basic-helix-loop-helix-leucine zipper transcription factor | <i>Caenorhabditis elegans</i>     | 7.3                  | 10.2  | 7.8    | 1.4                                  | 0.3  | 1.4         | 0.4   |
| 30 | 171e09   | AV643360 | HCL068d01       | 2 basic-helix-loop-helix-leucine zipper transcription factor | <i>Caenorhabditis elegans</i>     | 4.4                  | 4.4   | 5.1    | 1.0                                  | 0.2  | 0.9         | 0.1   |
| 31 | 116a10   | AV392166 | CM095f12        | 2,3-bisphosphoglycerate-independent phosphoglyceratemutase   | <i>Chlamydomonas reinhardtii</i>  | 21.3                 | 18.1  | 13.5   | 0.8                                  | 0.0  | 1.3         | 0.1   |
| 32 | 161d07   | BP093115 | MXL003e11       | 2,3-bisphosphoglycerate-independent phosphoglyceratemutase   | <i>Chlamydomonas reinhardtii</i>  | 33.6                 | 20.6  | 21.7   | 0.6                                  | 0.1  | 1.0         | 0.4   |
| 33 | 027c01   | AV628985 | LCL050a02       | 20S proteasome alpha subunit PSMA5                           | <i>Drosophila melanogaster</i>    | 17.8                 | 17.1  | 17.7   | 1.0                                  | 0.1  | 1.0         | 0.2   |
| 34 | 023e03   | AV625147 | LC088e03        | 20S proteasome beta subunit PBD2                             | <i>Arabidopsis thaliana</i>       | 17.3                 | 16.5  | 18.4   | 1.0                                  | 0.3  | 0.9         | 0.3   |
| 35 | 032a01   | BP087563 | MX037e08        | 20S proteasome beta subunit PBG1                             | <i>Arabidopsis thaliana</i>       | 18.6                 | 19.6  | 20.9   | 1.1                                  | 0.2  | 0.9         | 0.1   |
| 36 | 010a12   | AV632206 | HC005c08        | 20S proteasome subunit PBA1                                  | <i>Arabidopsis thaliana</i>       | 7.7                  | 9.1   | 10.5   | 1.2                                  | 0.2  | 0.9         | 0.2   |
| 37 | 031d04   | BP086817 | MX017e07        | 20S proteasome subunit PBA1                                  | <i>Arabidopsis thaliana</i>       | 10.7                 | 9.6   | 13.2   | 0.9                                  | 0.3  | 0.7         | 0.1   |
| 38 | 008h01   | AV388035 | CM077a03        | 25-hydroxyvitamin D 24-hydroxylase cytochrome P450 subunit   | <i>Homo sapiens</i>               | 6.6                  | 9.7   | 4.9    | 1.6                                  | 0.4  | 2.0         | 0.5   |
| 39 | 029a06   | AV630499 | LCL079g11       | 26S proteasome ATPase subunit                                | <i>Arabidopsis thaliana</i>       | 40.0                 | 25.6  | 33.6   | 0.6                                  | 0.0  | 0.8         | 0.3   |
| 40 | 008q04   | AV389255 | CM075h03        | 26S proteasome regulatory complex subunit p39A               | <i>Drosophila melanogaster</i>    | 14.7                 | 16.2  | 23.4   | 1.1                                  | 0.3  | 0.9         | 0.5   |
| 41 | 143e01   | AV625740 | LC097c03        | 26S proteasome regulatory complex subunit p42D               | <i>Drosophila melanogaster</i>    | 25.1                 | 23.5  | 28.1   | 0.9                                  | 0.2  | 0.9         | 0.3   |
| 42 | 130b11   | BP383742 | HCL067b05       | 26S proteasome regulatory subunit                            | <i>Arabidopsis thaliana</i>       | 17.5                 | 16.8  | 16.5   | 1.0                                  | 0.2  | 1.0         | 0.2   |
| 43 | 155f09   | AV631538 | LCL095h05       | 26S proteasome regulatory subunit 4, homolog, MTS2           | <i>Arabidopsis thaliana</i>       | 20.6                 | 24.1  | 32.7   | 1.2                                  | 0.1  | 0.7         | 0.2   |
| 44 | 021h10   | AV623138 | LC059d10        | 26S proteasome regulatory subunit 8, XSUG1                   | <i>Arabidopsis thaliana</i>       | 20.1                 | 19.7  | 27.8   | 1.0                                  | 0.1  | 0.7         | 0.1   |
| 45 | 025d04   | AV627307 | LCL024g02       | 26S proteasome regulatory subunit S2                         | <i>Arabidopsis thaliana</i>       | 1.4                  | 1.6   | 1.3    | 1.2                                  | 0.4  | 1.4         | 0.5   |
| 46 | 136a04   | AV620391 | LC021e09        | 26S proteasome subunit 4-like protein                        | <i>Arabidopsis thaliana</i>       | 16.5                 | 17.6  | 26.0   | 1.1                                  | 0.2  | 0.7         | 0.1   |
| 47 | 032a07   | BP087700 | MX041g02        | 29621 gene product                                           | <i>Arabidopsis thaliana</i>       | 200.3                | 180.0 | 160.4  | 0.9                                  | 0.1  | 1.2         | 0.6   |
| 48 | 159d10   | BP087792 | MX043g03        | 2-cys peroxiredoxin BAS1                                     | <i>Chlamydomonas reinhardtii</i>  | 108.8                | 125.0 | 123.7  | 1.1                                  | 0.2  | 1.3         | 0.8   |
| 49 | 116b07   | AV392510 | CM096h12        | 2-isopropylmalate synthase                                   | <i>Lycopodium pennellii</i>       | 20.9                 | 11.8  | 15.6   | 0.6                                  | 0.1  | 0.8         | 0.1   |
| 50 | 134b04   | AV619002 | LC002e01        | 2-oxoglutarate dehydrogenase E2 subunit                      | <i>Arabidopsis thaliana</i>       | 13.2                 | 13.2  | 11.0   | 1.0                                  | 0.1  | 1.2         | 0.2   |
| 51 | 032b12   | BP093042 | MXL002e08       | 2-oxoglutarate dehydrogenase E2 subunit                      | <i>Arabidopsis thaliana</i>       | 29.8                 | 18.4  | 23.3   | 0.6                                  | 0.2  | 0.8         | 0.1   |
| 52 | 007g09   | AV392308 | CM060g01        | 2-oxoglutarate dehydrogenase E2 subunit                      | <i>Arabidopsis thaliana</i>       | 13.5                 | 12.6  | 16.8   | 0.9                                  | 0.1  | 0.8         | 0.1   |
| 53 | 026f09   | AV628497 | LCL042g07       | 2-oxoglutarate/malate translocator                           | <i>Arabidopsis thaliana</i>       | 8.4                  | 22.5  | 18.1   | 2.8                                  | 1.2  | 1.3         | 0.4   |
| 54 | 023f08   | AV625557 | LC094f01        | 2-oxoglutarate/malate translocator                           | <i>Spinacia oleracea</i>          | 59.8                 | 39.7  | 45.9   | 0.7                                  | 0.1  | 0.9         | 0.1   |
| 55 | 004f09   | AV387134 | CM012c07        | 2-oxoglutarate/malate translocator                           | <i>Spinacia oleracea</i>          | 30.0                 | 20.4  | 27.9   | 0.7                                  | 0.1  | 0.8         | 0.4   |
| 56 | 126c04   | BP098718 | MXL097h10       | 2-oxoglutarate/malate translocator precursor-like protein    | <i>Arabidopsis thaliana</i>       | 9.1                  | 22.0  | 18.9   | 2.4                                  | 0.5  | 1.2         | 0.5   |
| 57 | 021e07   | AV622532 | LC050h08        | 2-oxoglutarate/malate translocator, OMT103                   | <i>Panicum miliaceum</i>          | 84.1                 | 76.7  | 85.2   | 0.9                                  | 0.1  | 1.0         | 0.5   |
| 58 | 034b02   | BP095262 | MXL039a09       | 3',5'-cyclic-nucleotide phosphodiesterase, HSPDE4A7          | <i>Homo sapiens</i>               | 9.8                  | 6.2   | 9.6    | 0.6                                  | 0.1  | 1.2         | 0.9   |
| 59 | 035d11   | BP097035 | MXL069a03       | 30S ribosomal protein S1                                     | <i>Synechococcus sp. PCC 6301</i> | 109.2                | 60.1  | 56.8   | 0.5                                  | 0.1  | 1.1         | 0.4   |
| 60 | 011e05   | AV635047 | HC041c03        | 30S ribosomal protein S13, chloroplast precursor             | <i>Pseudomonas aeruginosa</i>     | 45.9                 | 26.9  | 30.6   | 0.6                                  | 0.3  | 1.0         | 0.6   |
| 61 | 109b05   | AV388211 | CM024b07        | 30S ribosomal protein S20                                    | <i>Arabidopsis thaliana</i>       | 666.5                | 249.6 | 566.1  | 0.4                                  | 0.1  | 0.4         | 0.1   |
| 62 | 013g08   | AV639557 | HCL001a02       | 30S ribosomal protein S5                                     | <i>Synechococcus sp. PCC 6301</i> | 70.5                 | 36.8  | 49.7   | 0.5                                  | 0.1  | 0.7         | 0.2   |
| 63 | 036b01   | BP097750 | MXL080g01       | 37391 gene product                                           | <i>Arabidopsis thaliana</i>       | 27.4                 | 22.0  | 17.1   | 0.8                                  | 0.4  | 1.3         | 0.2   |
| 64 | 003h12   | AV386497 | CM001c02        | 37kDa chloroplast inner envelope membrane polypeptide        | <i>Nicotiana tabacum</i>          | 5.9                  | 3.8   | 7.4    | 0.7                                  | 0.1  | 0.5         | 0.1   |
| 65 | 139a08   | AV622769 | LC054c06        | 3-dehydroquinate synthase                                    | <i>Escherichia coli</i>           | 20.1                 | 13.6  | 10.9   | 0.7                                  | 0.2  | 1.2         | 0.1   |
| 66 | 001b06   | AV393557 | CL05f02         | 3-deoxy-D-arabino-heptulosonate gamma-phosphate synthase     | <i>Arabidopsis thaliana</i>       | 20.1                 | 24.8  | 25.1   | 1.2                                  | 0.3  | 1.0         | 0.1   |
| 67 | 002e05   | AV395473 | CL42b03         | 3-isopropylmalate dehydratase                                | <i>Xanthomonas axonopodis</i>     | 18.2                 | 16.9  | 16.9   | 0.9                                  | 0.1  | 1.0         | 0.1   |
| 68 | 033e05   | BP094463 | MXL023d11       | 3-isopropylmalate dehydratase, small subunit                 | <i>Arabidopsis thaliana</i>       | 63.7                 | 22.6  | 32.7   | 0.3                                  | 0.1  | 0.9         | 0.7   |
| 69 | 020d01   | AV620949 | LC029a11        | 3-ketoacyl-acyl carrier protein reductase                    | <i>Escherichia coli</i>           | 6.4                  | 6.6   | 4.3    | 1.1                                  | 0.4  | 1.6         | 0.5   |
| 70 | 121h10   | AV637604 | HC075e07        | 40S ribosomal protein S0                                     | <i>Neurospora crassa</i>          | 4.8                  | 5.2   | 4.5    | 1.1                                  | 0.2  | 1.2         | 0.2   |
| 71 | 001g08   | AV394268 | CL22e09         | 40S ribosomal protein S11                                    | <i>Dunaliella tertiolecta</i>     | 46.4                 | 54.8  | 57.6   | 1.2                                  | 0.1  | 1.1         | 0.5   |
| 72 | 101b11   | AV393432 | CL03b03         | 40S ribosomal protein S12                                    | <i>Hordeum vulgare</i>            | 71.3                 | 75.8  | 43.4   | 1.0                                  | 0.1  | 1.8         | 0.8   |
| 73 | 104h03   | AV396147 | CL54h03         | 40S ribosomal protein S14                                    |                                   | 62.2                 | 78.2  | 52.6   | 1.4                                  | 0.5  | 1.7         | 0.7   |
| 74 | 026h02   | AV628579 | LCL044a08       | 40S ribosomal protein S16                                    | <i>Arabidopsis thaliana</i>       | 113.7                | 105.6 | 75.2   | 1.0                                  | 0.2  | 1.4         | 0.2   |
| 75 | 001a11   | AV397616 | CL02h08         | 40S ribosomal protein S17                                    | <i>Arabidopsis thaliana</i>       | 820.3                | 745.3 | 687.4  | 0.9                                  | 0.1  | 1.1         | 0.1   |
| 76 | 159a06   | BP087724 | MX042d01        | 40S ribosomal protein S18                                    | <i>Chlamydomonas reinhardtii</i>  | 118.1                | 176.6 | 75.9   | 1.5                                  | 0.2  | 3.6         | 2.8   |
| 77 | 018h05   | AV619187 | LC004h08        | 40S ribosomal protein S18                                    | <i>Chlamydomonas reinhardtii</i>  | 85.4                 | 82.9  | 64.2   | 1.0                                  | 0.1  | 1.3         | 0.1   |
| 78 | 008c07   | AV393227 | CM068f05        | 40S ribosomal protein S19                                    | <i>Arabidopsis thaliana</i>       | 102.6                | 128.9 | 96.5   | 1.3                                  | 0.2  | 1.5         | 0.7   |
| 79 | 001h11   | AV394724 | CL27c03         | 40S ribosomal protein S20                                    | <i>Chlamys farreri</i>            | 70.3                 | 68.7  | 58.8   | 1.1                                  | 0.3  | 1.2         | 0.3   |
| 80 | 133d12   | AV645064 | HCL097f11       | 40S ribosomal protein S21                                    | <i>Cyanophora paradoxa</i>        | 143.2                | 179.3 | 94.0   | 1.4                                  | 0.3  | 2.0         | 0.9   |
| 81 | 013h03   | AV639610 | HCL001h04       | 40S ribosomal protein S21                                    | <i>Arabidopsis thaliana</i>       | 31.0                 | 37.   |        |                                      |      |             |       |

|     | A      | B        | C         | D                                                                  | E                                     | F     | G     | H     | I   | J   | K    | L    |
|-----|--------|----------|-----------|--------------------------------------------------------------------|---------------------------------------|-------|-------|-------|-----|-----|------|------|
| 105 | 018b07 | AV644217 | HCL084b10 | 50S ribosomal protein L22                                          | <i>Synechococcus sp. PCC 6301</i>     | 45.7  | 26.3  | 26.7  | 0.6 | 0.4 | 1.1  | 0.9  |
| 106 | 010c10 | AV632566 | HC009g05  | 50S ribosomal protein L3                                           | <i>Arabidopsis thaliana</i>           | 131.4 | 47.2  | 63.1  | 0.3 | 0.1 | 0.7  | 0.4  |
| 107 | 137c02 | AV621341 | LC034f05  | 50S ribosomal protein L34                                          | <i>Synechocystis sp. PCC 6803</i>     | 52.4  | 37.7  | 32.7  | 0.7 | 0.4 | 1.4  | 1.2  |
| 108 | 030c03 | AV631489 | LCL094h09 | 50S ribosomal protein L4, chloroplast precursor                    | <i>Nicotiana tabacum</i>              | 87.1  | 48.2  | 48.9  | 0.5 | 0.3 | 1.1  | 0.7  |
| 109 | 007d05 | AV391555 | CM055b07  | 50S ribosomal protein L9                                           | <i>Synechocystis sp. PCC 6803</i>     | 24.4  | 17.5  | 31.4  | 0.8 | 0.5 | 0.6  | 0.4  |
| 110 | 030h02 | BP086214 | MX004c06  | 5'-adenylylsulfate kinase                                          | <i>Enteromorpha intestinalis</i>      | 11.2  | 10.5  | 14.1  | 0.9 | 0.2 | 0.7  | 0.1  |
| 111 | 035h05 | BP097455 | MXL076a03 | 5'-adenylylsulfate reductase                                       | <i>Chlamydomonas reinhardtii</i>      | 41.3  | 33.2  | 41.0  | 0.8 | 0.1 | 0.9  | 0.3  |
| 112 | 033b00 | BP094848 | MXL031a06 | 5'-AMP-activated protein kinase, beta-1 subunit                    | <i>Arabidopsis thaliana</i>           | 15.3  | 17.3  | 12.9  | 1.1 | 0.2 | 1.4  | 0.2  |
| 113 | 010c02 | AV632382 | HC007e04  | 5-enolpyruvylshikimate-3-phosphate synthase precursor              | <i>Petunia hybrida</i>                | 23.5  | 19.4  | 18.3  | 0.9 | 0.2 | 1.1  | 0.2  |
| 114 | 161e03 | BP093184 | MXL004f12 | 5-methyltetrahydrofolate- homocysteine transferase                 | <i>Escherichia coli</i>               | 25.8  | 26.8  | 18.4  | 1.0 | 0.1 | 1.5  | 0.1  |
| 115 | 172h06 | BP098561 | MXL095e05 | 5-methyltetrahydrofolate- homocysteine transferase                 | <i>Escherichia coli</i>               | 23.6  | 12.7  | 17.3  | 0.6 | 0.3 | 0.8  | 0.5  |
| 116 | 016h09 | AV642703 | HCL056d01 | 5-methyltetrahydrofolate-homocysteinemethyltransferase reductase   | <i>Mus musculus</i>                   | 11.3  | 13.4  | 10.8  | 1.2 | 0.5 | 1.3  | 0.6  |
| 117 | 105d10 | AV396539 | CL63d11   | 5-methyltetrahydrofolate-homocysteinemethyltransferase reductase   | <i>Mus musculus</i>                   | 18.4  | 17.0  | 26.0  | 0.9 | 0.1 | 0.7  | 0.2  |
| 118 | 105g10 | AV396818 | CL69c02   | 5-oxo-L-prolinase                                                  | <i>Rattus norvegicus</i>              | 11.1  | 10.1  | 10.3  | 0.9 | 0.1 | 1.0  | 0.1  |
| 119 | 144h10 | AV626443 | LCL009b08 | 60S acidic ribosomal protein P2                                    | <i>Branchiostoma belcheri</i>         | 43.1  | 27.7  | 19.5  | 0.7 | 0.1 | 1.5  | 1.1  |
| 120 | 003d01 | AV397921 | CL59g06   | 60S acidic ribosomal protein P2                                    | <i>Branchiostoma floridae</i>         | 53.7  | 63.5  | 53.7  | 1.2 | 0.1 | 1.2  | 0.4  |
| 121 | 106f12 | AV397835 | CM002g03  | 60S acidic ribosomal protein Po (L10)                              | <i>Caenorhabditis elegans</i>         | 9.1   | 5.2   | 4.0   | 0.6 | 0.1 | 1.3  | 0.2  |
| 122 | 002b06 | AV395014 | CL13g07   | 60S acidic ribosomal protein P0                                    | <i>Zea mays</i>                       | 63.7  | 79.9  | 45.1  | 1.3 | 0.2 | 1.8  | 0.3  |
| 123 | 139f07 | BP383803 | LC061a09  | 60S ribosomal protein                                              | <i>Dunaliella salina</i>              | 277.0 | 310.6 | 234.7 | 1.1 | 0.1 | 1.4  | 0.6  |
| 124 | 004c02 | AV386681 | CM004d12  | 60S ribosomal protein                                              | <i>Dunaliella salina</i>              | 198.4 | 268.8 | 211.0 | 1.4 | 0.3 | 1.3  | 0.2  |
| 125 | 143b01 | AV625569 | LC094g05  | 60S ribosomal protein L10, EQM                                     | <i>Arabidopsis thaliana</i>           | 124.6 | 127.2 | 92.9  | 1.0 | 0.3 | 1.5  | 0.7  |
| 126 | 116b01 | AV392639 | CM096d08  | 60S ribosomal protein L10, EQM                                     | <i>Solanum melongena</i>              | 60.1  | 92.4  | 71.8  | 1.6 | 0.3 | 1.4  | 0.5  |
| 127 | 001d06 | AV393815 | CL12b06   | 60S ribosomal protein L10, EQM                                     | <i>Solanum melongena</i>              | 33.3  | 29.4  | 31.9  | 0.9 | 0.2 | 1.0  | 0.3  |
| 128 | 143c11 | AV625672 | LC096c07  | 60S ribosomal protein L10, Wilm's tumor suppressor protein homolog | <i>Oryza sativa</i>                   | 118.6 | 133.5 | 112.6 | 1.1 | 0.1 | 1.3  | 0.6  |
| 129 | 108a07 | AV387421 | CM015h11  | 60S ribosomal protein L10, Wilm's tumor suppressor protein homolog | <i>Caenorhabditis elegans</i>         | 85.6  | 94.0  | 81.0  | 1.1 | 0.1 | 1.2  | 0.1  |
| 130 | 142f05 | AV625346 | LC091c03  | 60S ribosomal protein L10-2, putative tumor suppressor SG12        | <i>Oryza sativa</i>                   | 55.7  | 77.0  | 84.0  | 1.4 | 0.0 | 1.2  | 0.5  |
| 131 | 001h03 | AV394516 | CL25b05   | 60S ribosomal protein L11                                          | <i>Chlamydomonas reinhardtii</i>      | 112.2 | 122.1 | 128.3 | 1.1 | 0.2 | 1.0  | 0.3  |
| 132 | 001g04 | AV394338 | CL21b03   | 60S ribosomal protein L12                                          | <i>Chlamydomonas reinhardtii</i>      | 97.6  | 120.1 | 94.9  | 1.2 | 0.3 | 1.4  | 0.7  |
| 133 | 001c07 | AV393548 | CL08f11   | 60S ribosomal protein L18                                          | <i>Arabidopsis thaliana</i>           | 96.6  | 104.1 | 72.1  | 1.2 | 0.4 | 1.5  | 0.3  |
| 134 | 158h11 | BP087716 | MX042b09  | 60S ribosomal protein L18                                          | <i>Arabidopsis thaliana</i>           | 177.4 | 174.1 | 145.8 | 1.1 | 0.6 | 1.2  | 0.1  |
| 135 | 140c03 | AV623698 | LC067d10  | 60S ribosomal protein L18A                                         | <i>Arabidopsis thaliana</i>           | 56.0  | 57.0  | 39.7  | 1.0 | 0.3 | 1.5  | 0.7  |
| 136 | 004b06 | AV386617 | CM003e12  | 60S ribosomal protein L2 (L8) (ribosomal protein TL2)              | <i>Lycopersicon esculentum</i>        | 80.7  | 78.4  | 65.4  | 1.0 | 0.3 | 1.4  | 0.6  |
| 137 | 118b02 | AV633439 | HC020g10  | 60S ribosomal protein L2 (L8) (ribosomal protein TL2)              | <i>Lycopersicon esculentum</i>        | 33.7  | 48.3  | 46.2  | 1.8 | 1.0 | 1.3  | 0.8  |
| 138 | 001d11 | AV393930 | CL13f10   | 60S ribosomal protein L21                                          | <i>Oryza sativa</i>                   | 69.1  | 58.1  | 62.2  | 0.9 | 0.1 | 1.2  | 0.7  |
| 139 | 001c11 | AV393729 | CL09b08   | 60S ribosomal protein L22                                          | <i>Schizosaccharomyces pombe</i>      | 61.2  | 71.8  | 46.9  | 1.1 | 0.3 | 1.6  | 0.9  |
| 140 | 158c10 | BP087612 | MX039a12  | 60S ribosomal protein L24                                          | <i>Hordeum vulgare subsp. vulgare</i> | 274.2 | 355.4 | 204.0 | 1.3 | 0.1 | 1.9  | 1.1  |
| 141 | 111d12 | AV390730 | CM047f03  | 60S ribosomal protein L24                                          | <i>Hordeum vulgare</i>                | 140.9 | 164.9 | 117.8 | 1.2 | 0.4 | 1.5  | 0.7  |
| 142 | 001c09 | AV393549 | CL08g11   | 60S ribosomal protein L27                                          | <i>Pyrobrotis stellata</i>            | 58.0  | 72.5  | 61.6  | 1.3 | 0.2 | 1.3  | 0.6  |
| 143 | 104d03 | AV397743 | CL49c03   | 60S ribosomal protein L27                                          | <i>Pyrobrotis stellata</i>            | 73.8  | 90.2  | 57.7  | 1.2 | 0.1 | 1.6  | 0.2  |
| 144 | 107d07 | AV397651 | CM009f06  | 60S ribosomal protein L27A                                         | <i>Arabidopsis thaliana</i>           | 53.3  | 51.7  | 38.5  | 1.0 | 0.0 | 1.6  | 0.7  |
| 145 | 004g11 | AV397105 | CM013h07  | 60S ribosomal protein L3                                           | <i>Medicago sativa subsp. x varia</i> | 157.6 | 204.2 | 272.1 | 1.3 | 0.3 | 0.8  | 0.3  |
| 146 | 133b09 | BP383770 | HCL096e04 | 60S ribosomal protein L30                                          | <i>Lupinus luteus</i>                 | 50.6  | 50.0  | 50.0  | 1.0 | 0.1 | 1.0  | 0.3  |
| 147 | 133b01 | BP383764 | HCL096a05 | 60S ribosomal protein L30                                          | <i>Lupinus luteus</i>                 | 60.1  | 54.2  | 64.7  | 0.9 | 0.1 | 0.9  | 0.5  |
| 148 | 005h05 | AV388603 | CM030e06  | 60S ribosomal protein L30 isolog                                   | <i>Arabidopsis thaliana</i>           | 69.4  | 33.2  | 66.2  | 0.5 | 0.1 | 0.5  | 0.1  |
| 149 | 004a05 | AV386486 | CM001g07  | 60S ribosomal protein L31                                          | <i>Chlamydomonas reinhardtii</i>      | 159.5 | 153.8 | 138.3 | 0.9 | 0.2 | 1.1  | 0.3  |
| 150 | 001e09 | AV393967 | CL15f12   | 60S ribosomal protein L35A                                         | <i>Zea mays</i>                       | 95.9  | 123.5 | 117.5 | 1.3 | 0.1 | 1.2  | 0.6  |
| 151 | 010c11 | AV632589 | HC010a09  | 60S ribosomal protein L37                                          | <i>Arabidopsis thaliana</i>           | 664.2 | 648.7 | 656.6 | 1.0 | 0.1 | 1.0  | 0.2  |
| 152 | 016c04 | AV641877 | HCL041g04 | 60S ribosomal protein L37a                                         | <i>Gossypium hirsutum</i>             | 22.2  | 23.6  | 11.9  | 1.5 | 0.7 | 1.9  | 0.8  |
| 153 | 003g04 | AV396988 | CL73d07   | 60S ribosomal protein L38                                          | <i>Lycopersicon esculentum</i>        | 3.8   | 5.2   | 4.2   | 1.5 | 0.6 | 1.3  | 0.5  |
| 154 | 018e03 | AV644698 | HCL092a01 | 60S ribosomal protein L39                                          | <i>Arabidopsis thaliana</i>           | 41.9  | 52.4  | 41.1  | 1.3 | 0.2 | 1.3  | 0.3  |
| 155 | 158d06 | BP087645 | MX040b10  | 60S ribosomal protein L3-B                                         | <i>Medicago sativa subsp. x varia</i> | 306.3 | 349.4 | 404.2 | 1.2 | 0.1 | 0.9  | 0.3  |
| 156 | 004h07 | AV387420 | CM015f11  | 60S ribosomal protein L4                                           | <i>Chlamydomonas sp. HS-5</i>         | 80.1  | 95.8  | 134.7 | 1.2 | 0.1 | 0.7  | 0.1  |
| 157 | 123b11 | AV639354 | HC098c09  | 60S ribosomal protein L5                                           | <i>Dunaliella salina</i>              | 261.0 | 332.6 | 240.2 | 1.3 | 0.3 | 1.4  | 0.2  |
| 158 | 121d11 | BP383712 | HC069d10  | 60S ribosomal protein L5                                           | <i>Dunaliella salina</i>              | 254.4 | 305.7 | 235.2 | 1.2 | 0.0 | 1.3  | 0.3  |
| 159 | 008h05 | AV389627 | CM079c08  | 60S ribosomal protein L6, YL16-like                                | <i>Arabidopsis thaliana</i>           | 48.3  | 50.8  | 49.1  | 1.1 | 0.2 | 1.1  | 0.3  |
| 160 | 009a08 | AV390244 | CM082e10  | 60S ribosomal protein L7A                                          | <i>Oryza sativa</i>                   | 131.2 | 145.4 | 107.0 | 1.1 | 0.1 | 1.4  | 0.1  |
| 161 | 109a04 | AV387748 | CM023b12  | 60S ribosomal protein L7A                                          | <i>Oryza sativa</i>                   | 50.7  | 81.9  | 78.9  | 1.6 | 0.1 | 1.1  | 0.4  |
| 162 | 001c05 | AV393547 | CL08e11   | 60S ribosomal protein, gibberellin-regulated protein               | <i>Arabidopsis thaliana</i>           | 65.1  | 69.4  | 78.9  | 1.1 | 0.1 | 0.9  | 0.3  |
| 163 | 015f01 | AV641252 | HCL030e07 | 60S ribosomal protein-like                                         | <i>Arabidopsis thaliana</i>           | 63.4  | 98.1  | 45.5  | 1.4 | 0.4 | 2.2  | 1.4  |
| 164 | 001h07 | AV394058 | CL18f05   | 60S ribosomal protein L25                                          | <i>Nicotiana tabacum</i>              | 85.2  | 97.6  | 76.3  | 1.2 | 0.2 | 1.3  | 0.5  |
| 165 | 001f10 | AV394154 | CL19e02   | 60S ribosomal protein L34                                          | <i>Nicotiana tabacum</i>              | 39.3  | 38.1  | 37.1  | 1.2 | 0.6 | 1.0  | 0.1  |
| 166 | 031c03 | BP086662 | MX013h07  | 64134 gene product                                                 | <i>Arabidopsis thaliana</i>           | 21.6  | 19.2  | 17.6  | 0.9 | 0.1 | 1.2  | 0.2  |
| 167 | 123h10 | AV639876 | HCL006e07 | 68 kDa heat-stress DnaK homolog                                    | <i>Lycopersicon peruvianum</i>        | 22.9  | 14.9  | 22.8  | 0.7 | 0.0 | 0.7  | 0.2  |
| 168 | 019f07 | AV620133 | LC018a06  | 6-phosphogluconate dehydrogenase                                   | <i>Chlamydomonas reinhardtii</i>      | 19.7  | 15.5  | 14.6  | 0.8 | 0.1 | 1.1  | 0.4  |
| 169 | 152c03 | AV629857 | LCL067g04 | 70 kDa heat shock protein                                          | <i>Chlamydomonas reinhardtii</i>      | 101.3 | 31.1  | 49.4  | 0.3 | 0.2 | 0.6  | 0.2  |
| 170 | 016g11 | AV642602 | HCL054e09 | 70 kDa heat shock protein                                          | <i>Chlamydomonas reinhardtii</i>      | 33.6  | 11.7  | 21.4  | 0.4 | 0.2 | 0.6  | 0.2  |
| 171 | 171e07 | BP097975 | MXL084e01 | 70 kDa heat shock protein, dnaK-type molecular chaperone HSP70     | <i>Chlamydomonas reinhardtii</i>      | 40.7  | 21.0  | 34.1  | 0.6 | 0.3 | 0.6  | 0.0  |
| 172 | 009h04 | AV393113 | CM100d06  | A_IG002N01.18 gene product                                         | <i>Arabidopsis thaliana</i>           | 74.1  | 66.1  | 61.6  | 0.9 | 0.2 | 1.1  | 0.3  |
| 173 | 020b05 | AV620779 | LC026g04  | A22 gene product                                                   | <i>Hordeum vulgare</i>                | 22.5  | 24.8  | 26.0  | 1.3 | 0.4 | 1.0  | 0.3  |
| 174 | 136h05 | AV620967 | LC029c12  | Aapocytochrome c                                                   | <i>Chlamydomonas reinhardtii</i>      | 96.6  | 94.5  | 59.8  | 1.0 | 0.1 | 1.6  | 0.7  |
| 175 | 011b08 | BP383736 | HCL060h04 | ABC transporter-like                                               | <i>Arabidopsis thaliana</i>           | 8.9   | 8.0   | 11.0  | 0.9 | 0.2 | 0.7  | 0.2  |
| 176 | 017h02 | BP383701 | HC043a12  | ABC transporter                                                    | <i>Synechocystis sp. PCC 6803</i>     | 19.0  | 11.3  | 13.7  | 0.7 | 0.2 | 0.9  | 0.2  |
| 177 | 035f01 | BP097183 | MXL071d09 | ABC transporter protein 1                                          | <i>Leishmania major</i>               | 12.0  | 13.0  | 13.7  | 1.1 | 0.6 | 1.5  | 1.3  |
| 178 | 014d08 | BP383724 | HCL009c03 | ABC transporter-like protein                                       | <i>Arabidopsis thaliana</i>           | 5.9   | 9.3   | 10.3  | 1.6 | 0.3 | 0.9  | 0.1  |
| 179 | 022b09 | AV623499 | LC064g02  | ABC1 protein                                                       | <i>Arabidopsis thaliana</i>           | 19.8  | 17.8  | 21.2  | 1.0 | 0.2 | 0.9  | 0.1  |
| 180 | 023f09 | BP383829 | LC095g10  | ABC-type transmembrane transporter                                 | <i>Chlamydomonas reinhardtii</i>      | 4.1   | 5.6   | 4.2   | 1.5 | 0.6 | 1.4  | 0.6  |
| 181 | 004d02 | AV386820 | CM007a09  | accD1 protein                                                      | <i>Mycobacterium tuberculosis</i>     | 34.3  | 36.7  | 21.2  | 2.2 | 1.8 | 10.6 | 12.2 |
| 182 | 008a03 | AV392625 | CM062g07  | Acetate kinase                                                     | <i>Escherichia coli</i>               | 11.3  | 10.7  | 6.6   | 1.0 | 0.2 | 1.6  | 0.4  |
| 183 | 009f09 | AV392559 | CM096h02  | Acetate kinase                                                     | <i>Bacillus subtilis</i>              | 4.4   | 4.0   | 5.6   | 0.9 | 0.1 | 0.7  | 0.0  |
| 184 | 031e01 | BP086909 | MX020a02  | Acetolactate synthase                                              | <i>Chlamydomonas reinhardtii</i>      | 29.5  | 34.0  | 33.9  | 1.2 | 0.2 | 1.1  | 0.4  |
| 185 | 03     |          |           |                                                                    |                                       |       |       |       |     |     |      |      |

|     | A      | B        | C         | D                                                      | E                                    | F     | G     | H     | I   | J   | K   | L   |
|-----|--------|----------|-----------|--------------------------------------------------------|--------------------------------------|-------|-------|-------|-----|-----|-----|-----|
| 212 | 025c07 | AV627243 | LCL023e05 | Adenylate kinase, ATP-AMP transphosphorylase           | <i>Cyprinus carpio</i>               | 18.3  | 19.0  | 23.2  | 1.0 | 0.2 | 0.8 | 0.2 |
| 213 | 026e07 | AV628388 | LCL041a07 | Adenylate kinase, ATP-AMP transphosphorylase           | <i>Oryza sativa</i>                  | 2.3   | 3.9   | 4.9   | 1.9 | 1.2 | 0.8 | 0.2 |
| 214 | 006h07 | AV390663 | CM047c04  | Adenylosuccinate lyase                                 | <i>Escherichia coli</i>              | 12.0  | 7.8   | 9.0   | 0.7 | 0.1 | 0.9 | 0.1 |
| 215 | 016a05 | AV641588 | HCL036h05 | Adenylosuccinate synthetase                            | <i>Zea mays</i>                      | 24.1  | 23.8  | 16.6  | 1.0 | 0.3 | 1.5 | 0.9 |
| 216 | 013h02 | AV639595 | HCL001e11 | Adenylyl cyclase                                       | <i>Dictyostelliumdiscoideum</i>      | 48.5  | 59.1  | 39.5  | 1.3 | 0.6 | 1.7 | 0.8 |
| 217 | 032c04 | BP093071 | MXL003a01 | Adenylyl cyclase                                       | <i>Dictyostelliumdiscoideum</i>      | 14.0  | 8.7   | 15.2  | 0.6 | 0.1 | 0.7 | 0.4 |
| 218 | 006c07 | AV389598 | CM038d11  | ADP/ATP translocase                                    | <i>Chlamydomonas reinhardtii</i>     | 95.0  | 65.0  | 85.6  | 0.7 | 0.2 | 0.8 | 0.4 |
| 219 | 036h10 | BP098879 | MXL100f10 | ADP-glucose pyrophosphorylase                          | <i>Cicer arietinum</i>               | 35.2  | 23.3  | 27.6  | 0.7 | 0.2 | 0.8 | 0.2 |
| 220 | 119c04 | AV634806 | HC038b05  | ADP-glucose-pyrophosphorylase large subunit            | <i>Triticum aestivum</i>             | 15.9  | 10.2  | 9.5   | 0.6 | 0.2 | 1.1 | 0.5 |
| 221 | 005a02 | AV387454 | CM016h10  | ADP-ribosylation factor                                | <i>Chlamydomonas reinhardtii</i>     | 42.4  | 43.6  | 45.3  | 1.1 | 0.4 | 1.0 | 0.3 |
| 222 | 009e10 | AV392020 | CM094d01  | ADP-ribosylation factor                                | <i>Histoplasma capsulatum</i>        | 14.2  | 17.3  | 21.9  | 1.2 | 0.4 | 0.8 | 0.4 |
| 223 | 147a08 | AV627354 | LCL025e03 | ADP-ribosylation factor-like 3                         | <i>Mus musculus</i>                  | 14.6  | 14.3  | 12.2  | 1.0 | 0.1 | 1.2 | 0.1 |
| 224 | 140b04 | BP383807 | LC066g01  | ADP-ribosylation-like factor homolog ARL6              | <i>Mus musculus</i>                  | 36.2  | 33.8  | 19.3  | 1.0 | 0.1 | 1.8 | 0.4 |
| 225 | 141f09 | AV624814 | LC083b03  | ADP-ribosylation-like factor homolog ARL6              | <i>Mus musculus</i>                  | 9.6   | 9.2   | 9.8   | 1.1 | 0.4 | 0.9 | 0.1 |
| 226 | 165f03 | BP095277 | MXL039c06 | ADP-ribosylation-like factor homolog ARL6              | <i>Mus musculus</i>                  | 6.3   | 5.6   | 7.4   | 0.9 | 0.3 | 0.8 | 0.3 |
| 227 | 130h03 | AV643725 | HCL074h08 | AIM-1                                                  | <i>Rattus norvegicus</i>             | 5.0   | 6.8   | 4.7   | 1.5 | 0.4 | 1.6 | 0.8 |
| 228 | 033h09 | BP095092 | MXL035f11 | Alanine aminotransferase                               | <i>Chlamydomonas reinhardtii</i>     | 44.7  | 83.5  | 86.8  | 1.8 | 0.3 | 1.0 | 0.1 |
| 229 | 002e09 | AV395488 | CL42f09   | Alanine aminotransferase                               | <i>Chlamydomonas reinhardtii</i>     | 7.8   | 21.1  | 36.7  | 2.9 | 1.4 | 0.6 | 0.1 |
| 230 | 145g10 | AV626859 | LCL016g10 | Alanine-a-ketoglutarate aminotransferase, Aat1         | <i>Chlamydomonas reinhardtii</i>     | 13.6  | 45.5  | 46.1  | 3.4 | 0.6 | 1.1 | 0.4 |
| 231 | 010d03 | AV632677 | HC011c01  | Alanine-glyoxylate aminotransferase                    | <i>Nostoc sp. PCC 7120</i>           | 13.7  | 27.0  | 20.3  | 2.0 | 0.3 | 1.3 | 0.1 |
| 232 | 133e10 | AV645098 | HCL098b10 | Alanine-glyoxylate aminotransferase 2                  | <i>Arabidopsis thaliana</i>          | 15.8  | 26.4  | 21.9  | 1.7 | 0.6 | 1.2 | 0.2 |
| 233 | 160b04 | AV641714 | HCL039c01 | Alanyl-tRNA synthetase                                 | <i>Dictyostellium discoideum</i>     | 18.2  | 14.6  | 16.3  | 0.8 | 0.1 | 0.9 | 0.3 |
| 234 | 030a07 | AV631300 | LCL091f07 | Alanyl-tRNA synthetase                                 | <i>Dictyostellium discoideum</i>     | 35.7  | 31.7  | 37.4  | 0.9 | 0.2 | 0.9 | 0.3 |
| 235 | 016d09 | AV642164 | HCL046f12 | Alanyl-tRNA synthetase                                 | <i>Dictyostellium discoideum</i>     | 12.4  | 11.2  | 19.1  | 0.9 | 0.1 | 0.6 | 0.2 |
| 236 | 034a11 | BP095252 | MXL038h05 | Alcohol dehydrogenase                                  | <i>Salmonella typhimurium</i>        | 41.5  | 23.0  | 15.4  | 0.6 | 0.1 | 1.5 | 0.3 |
| 237 | 031f08 | BP087211 | MX028b11  | Alcohol dehydrogenase (adhE)                           | <i>Escherichia coli</i>              | 30.6  | 22.6  | 21.1  | 0.7 | 0.1 | 1.1 | 0.1 |
| 238 | 005c09 | AV387842 | CM022b06  | Alcohol dehydrogenase class III                        | <i>Pisum sativum</i>                 | 7.7   | 6.3   | 9.4   | 0.8 | 0.2 | 0.7 | 0.1 |
| 239 | 133c08 | AV644998 | HCL096g07 | Alcohol dehydrogenase E                                | <i>Giardia intestinalis</i>          | 40.6  | 28.1  | 18.4  | 0.7 | 0.2 | 1.5 | 0.2 |
| 240 | 120b11 | AV635889 | HC052c08  | Alcohol dehydrogenase                                  | <i>Emmericella nidulans</i>          | 54.0  | 58.6  | 45.5  | 1.1 | 0.2 | 1.6 | 0.9 |
| 241 | 164b03 | BP094636 | MXL028b04 | Aldehyde dehydrogenase E                               | <i>Clostridium acetobutylicum</i>    | 35.2  | 28.0  | 11.4  | 0.8 | 0.0 | 2.7 | 1.0 |
| 242 | 123d09 | AV639579 | HCL001c07 | Aldehydedehydrogenase-like protein                     | <i>Arabidopsis thaliana</i>          | 203.8 | 177.5 | 169.7 | 1.0 | 0.4 | 1.1 | 0.2 |
| 243 | 138g10 | AV622582 | LC051e10  | Aldosereductase                                        | <i>Rattus norvegicus</i>             | 8.2   | 11.4  | 12.2  | 1.4 | 0.6 | 0.9 | 0.4 |
| 244 | 105b10 | AV397916 | CL59b12   | ALG-2-interacting protein X                            | <i>Arabidopsis thaliana</i>          | 3.9   | 4.1   | 5.7   | 1.1 | 0.1 | 0.8 | 0.4 |
| 245 | 001g09 | AV394241 | CL22h01   | Alpha-amylase                                          | <i>Phaseolus vulgaris</i>            | 8.9   | 8.0   | 10.8  | 0.9 | 0.2 | 0.8 | 0.2 |
| 246 | 101c07 | AV632514 | HC009b10  | alpha-glucan phosphorylase type H isozyme              | <i>Solanum tuberosum</i>             | 17.5  | 21.2  | 23.2  | 1.2 | 0.2 | 0.9 | 0.2 |
| 247 | 160a10 | BP098867 | MXL100d12 | Alpha-glucan phsporylase L-2                           | <i>Solanum tuberosum</i>             | 50.4  | 64.3  | 27.4  | 1.3 | 0.4 | 3.3 | 2.4 |
| 248 | 169a05 | BP096783 | MXL064h01 | Alpha-ketoglutarate decarboxylase                      | <i>Escherichia coli</i>              | 7.1   | 7.4   | 6.0   | 1.0 | 0.3 | 1.2 | 0.2 |
| 249 | 021a08 | AV621892 | LC042c07  | Alpha-tubulin-3                                        | <i>Chlorarachnion CCMP621</i>        | 161.8 | 269.6 | 152.5 | 1.7 | 0.1 | 1.8 | 0.3 |
| 250 | 023q01 | AV626025 | LCL001c01 | Alternative NADH-dehydrogenase                         | <i>Yarrowia lipolytica</i>           | 13.4  | 8.9   | 12.8  | 0.7 | 0.2 | 1.1 | 0.8 |
| 251 | 035b02 | BP096600 | MXL061e12 | Alternative oxidase 1                                  | <i>Chlamydomonas reinhardtii</i>     | 8.9   | 8.6   | 4.6   | 1.0 | 0.1 | 2.0 | 0.6 |
| 252 | 111a02 | AV390036 | CM041f03  | Alternative splicing factor ASF-3                      | <i>Homo sapiens</i>                  | 13.4  | 12.1  | 13.9  | 1.0 | 0.5 | 0.9 | 0.1 |
| 253 | 131c03 | AV643970 | HCL079d03 | Amino acid transport protein                           | <i>Arabidopsis thaliana</i>          | 4.7   | 5.7   | 5.1   | 1.2 | 0.3 | 1.2 | 0.4 |
| 254 | 023c04 | AV624870 | HCL083h03 | Aminoacyl tRNA-synthetase                              | <i>Arabidopsis thaliana</i>          | 33.0  | 22.3  | 27.3  | 0.7 | 0.2 | 0.8 | 0.1 |
| 255 | 003f10 | AV396885 | CL71g03   | Aminoacyl-tRNA synthetase                              | <i>Arabidopsis thaliana</i>          | 5.8   | 3.7   | 6.7   | 0.7 | 0.2 | 0.5 | 0.1 |
| 256 | 021d03 | AV622280 | LC047a06  | Aminoimidazole ribonucleotide synthetase               | <i>Vigna unguiculata</i>             | 34.0  | 23.6  | 21.0  | 0.7 | 0.2 | 1.1 | 0.2 |
| 257 | 009e06 | AV391677 | CM092h09  | Aminomethyltransferase                                 | <i>Arabidopsis thaliana</i>          | 14.1  | 25.5  | 24.3  | 2.0 | 0.6 | 1.1 | 0.1 |
| 258 | 024h02 | AV626873 | LCL017a11 | Aminomethyltransferase                                 | <i>Mesembryanthemum crystallinum</i> | 15.4  | 25.6  | 28.0  | 1.7 | 0.2 | 1.0 | 0.3 |
| 259 | 166h08 | BP095818 | MXL047h06 | Aminopetidase N                                        | <i>Neisseria meningitidis MC58</i>   | 26.1  | 23.3  | 36.6  | 0.8 | 0.3 | 0.7 | 0.6 |
| 260 | 027h03 | AV629452 | LCL059a05 | Aminophospholipid translocase 2                        | <i>Trichomonas vaginalis</i>         | 2.0   | 2.0   | 1.4   | 1.0 | 0.2 | 1.4 | 0.3 |
| 261 | 033f05 | BP094653 | MXL026e04 | Ammonium transporter, Amt2                             | <i>Archaeoglobus fulgidus</i>        | 9.9   | 8.2   | 6.9   | 0.8 | 0.1 | 1.2 | 0.2 |
| 262 | 159g04 | BP088037 | MX049h08  | Ankyrin repeat-containing protein 2                    | <i>Arabidopsis thaliana</i>          | 45.8  | 35.4  | 33.8  | 0.8 | 0.1 | 1.0 | 0.2 |
| 263 | 028b10 | AV629721 | LCL064e08 | Ankyrin repeat-containing protein 2                    | <i>Arabidopsis thaliana</i>          | 50.3  | 36.4  | 36.9  | 0.8 | 0.2 | 1.0 | 0.3 |
| 264 | 009f03 | AV392099 | CM094g07  | Anexin VII                                             | <i>Dictyostellium discoideum</i>     | 5.7   | 7.9   | 7.6   | 1.6 | 0.5 | 1.0 | 0.2 |
| 265 | 002q01 | AV395701 | CL47b08   | Antifreeze glycopeptide AFGP polyprotein precursor     | <i>Boreogadus saida</i>              | 6.4   | 10.8  | 6.6   | 1.9 | 0.7 | 1.7 | 0.3 |
| 266 | 019g02 | AV620226 | LC019c06  | Antioxidant enzyme AOE372                              | <i>Mus musculus</i>                  | 43.8  | 53.2  | 35.9  | 1.2 | 0.1 | 1.7 | 0.8 |
| 267 | 001c10 | AV393709 | CL09b05   | Apoplastocyanin, PC6-2, precursor                      | <i>Chlamydomonas reinhardtii</i>     | 237.8 | 190.7 | 282.0 | 0.8 | 0.2 | 0.8 | 0.5 |
| 268 | 004h10 | AV387442 | CM016d01  | Apospory-associated protein C                          | <i>Chlamydomonas reinhardtii</i>     | 54.6  | 61.3  | 23.0  | 1.0 | 0.3 | 3.3 | 3.4 |
| 269 | 004d04 | AV386805 | CM007f02  | Apospory-associated protein C                          | <i>Chlamydomonas reinhardtii</i>     | 20.0  | 21.2  | 13.4  | 1.1 | 0.1 | 1.6 | 0.5 |
| 270 | 159h03 | BP088168 | MX053b08  | Arginine deiminase                                     | <i>Giardia intestinalis</i>          | 5.7   | 6.1   | 7.5   | 1.1 | 0.2 | 0.9 | 0.6 |
| 271 | 006a11 | AV389054 | CM034d09  | Arginine/serine-rich splicing factor RSP31             | <i>Arabidopsis thaliana</i>          | 6.5   | 5.5   | 5.5   | 0.8 | 0.3 | 1.0 | 0.4 |
| 272 | 007b07 | AV391253 | CM052d04  | Argininosuccinate synthase-like protein                | <i>Arabidopsis thaliana</i>          | 34.1  | 26.3  | 29.4  | 0.8 | 0.3 | 1.0 | 0.4 |
| 273 | 156h05 | BP086406 | MX008b10  | Argininosuccinate synthase                             | <i>Deinococcus radiodurans</i>       | 38.0  | 31.7  | 34.5  | 0.9 | 0.2 | 0.9 | 0.2 |
| 274 | 024b10 | AV626380 | LCL008b07 | Arginyl-tRNA synthetase                                | <i>Arabidopsis thaliana</i>          | 38.3  | 21.5  | 28.1  | 0.6 | 0.2 | 0.8 | 0.2 |
| 275 | 163f11 | BP094443 | MXL023b03 | Arylsulfatase                                          | <i>Chlamydomonas reinhardtii</i>     | 7.1   | 5.6   | 7.2   | 0.8 | 0.2 | 0.8 | 0.1 |
| 276 | 018b03 | AV644146 | HCL082g12 | Ascorbate oxidase promoter-binding protein             | <i>Cucurbita maxima</i>              | 6.8   | 6.1   | 5.7   | 0.9 | 0.1 | 1.1 | 0.2 |
| 277 | 034h04 | BP096345 | MXL057b06 | Asparagine synthase (glutamine-hydrolysing)            | <i>Asparagus officinalis</i>         | 42.9  | 18.2  | 22.6  | 0.4 | 0.2 | 0.8 | 0.4 |
| 278 | 155e05 | AV631456 | LCL094c10 | Asparagine synthetase                                  | <i>Asparagus officinalis</i>         | 33.7  | 13.8  | 22.4  | 0.4 | 0.1 | 0.6 | 0.3 |
| 279 | 034f04 | BP096037 | MXL051e09 | Asparaginyl-tRNA synthetase, cytoplasmic 1             | <i>Arabidopsis thaliana</i>          | 36.1  | 21.0  | 25.1  | 0.6 | 0.1 | 0.9 | 0.3 |
| 280 | 107c10 | AV386741 | CM008g10  | Aspartate aminotransferase                             | <i>Arabidopsis thaliana</i>          | 10.0  | 16.5  | 9.7   | 1.7 | 0.3 | 1.7 | 0.3 |
| 281 | 018b11 | AV644287 | HCL085e08 | Aspartate aminotransferase                             | <i>Arabidopsis thaliana</i>          | 11.6  | 9.5   | 11.0  | 0.8 | 0.3 | 0.9 | 0.2 |
| 282 | 150e03 | AV629029 | LCL050f06 | Aspartate kinase-homoserine dehydrogenase-like protein | <i>Arabidopsis thaliana</i>          | 24.7  | 39.4  | 24.8  | 1.6 | 0.3 | 1.7 | 0.3 |
| 283 | 129a07 | AV642645 | HCL055c07 | Aspartate transaminase AAT3                            | <i>Panicum millicaeum</i>            | 15.6  | 7.0   | 9.7   | 0.5 | 0.1 | 0.7 | 0.2 |
| 284 | 035f05 | BP097223 | MXL072a11 | Aspartate transaminase chain 2c                        | <i>Medicago sativa</i>               | 18.5  | 12.2  | 15.3  | 0.6 | 0.2 | 0.9 | 0.5 |
| 285 | 012g02 | AV637295 | HC071c06  | Aspartate-semialdehyde dehydrogenase                   | <i>Arabidopsis thaliana</i>          | 42.3  | 44.3  | 46.7  | 1.1 | 0.2 | 0.9 | 0.1 |
| 286 | 159f11 | BP088002 | MX049b08  | Aspartate-tRNA ligase homolog                          | <i>Arabidopsis thaliana</i>          | 18.0  | 16.0  | 13.8  | 0.9 | 0.1 | 1.1 | 0.3 |
| 287 | 013q03 | AV639073 | HC094f08  | Aspartic proteinase L5                                 | <i>Oryza sativa</i>                  | 4.5   | 16.3  | 15.8  | 3.6 | 0.5 | 1.1 | 0.5 |
| 288 | 005a09 | AV387224 | CM018e11  | Aspartokinase-homoserine dehydrogenase                 | <i>Daucus carota</i>                 | 14.9  | 13.7  | 11.1  | 0.9 | 0.1 | 1.2 | 0.2 |
| 289 | 030e06 | AV631709 | LCL098e07 | Aspartyl aminopeptidase                                | <i>Homo sapiens</i>                  | 11.9  | 9.5   | 11.7  | 0.8 | 0.1 | 0.8 | 0.2 |
| 290 | 018c04 | AV644316 | HCL086b10 | AT103 gene product                                     | <i>Arabidopsis thaliana</i>          | 20.9  | 10.2  | 36.6  | 0.5 | 0.1 | 0.3 | 0.0 |
| 291 | 022h08 | AV640441 | HCL016d01 | AT1g65900 gene product                                 | <i>Arabidopsis thaliana</i>          | 417.6 | 222.6 | 177.1 | 0.5 | 0.1 | 1.5 | 1.0 |
| 292 | 036g08 | BP098701 | MXL097f06 | AT1g65900 gene product                                 | <i>Arabidopsis thaliana</i>          | 398.0 | 207.6 | 157.5 | 0.5 | 0.1 | 1.4 | 0.8 |
| 293 | 013d05 | AV638622 | HC088f07  | AT3g61320 gene                                         |                                      |       |       |       |     |     |     |     |

|     | A      | B        | C         | D                                                              | E                                 | F     | G     | H     | I   | J   | K   | L   |
|-----|--------|----------|-----------|----------------------------------------------------------------|-----------------------------------|-------|-------|-------|-----|-----|-----|-----|
| 319 | 154h02 | AV631167 | LCL089g07 | Bcp                                                            | <i>Mycobacterium tuberculosis</i> | 7.3   | 3.6   | 8.3   | 0.5 | 0.0 | 0.4 | 0.0 |
| 320 | 151d02 | AV629441 | LCL058g09 | Beta transducin isolog                                         | <i>Arabidopsis thaliana</i>       | 14.6  | 11.1  | 9.2   | 0.8 | 0.2 | 1.3 | 0.4 |
| 321 | 003g12 | AV397105 | CL76a01   | Beta-1 tubulin                                                 | <i>Chlamydomonas reinhardtii</i>  | 75.8  | 101.0 | 87.5  | 1.3 | 0.3 | 1.1 | 0.3 |
| 322 | 010f08 | AV633292 | HC019a09  | Beta-amylase                                                   | <i>Arabidopsis thaliana</i>       | 16.2  | 13.3  | 14.1  | 0.8 | 0.2 | 0.9 | 0.3 |
| 323 | 035b06 | BP096625 | MXL062e02 | Beta-COP-like protein                                          | <i>Arabidopsis thaliana</i>       | 23.7  | 19.0  | 20.7  | 0.8 | 0.1 | 0.9 | 0.3 |
| 324 | 127a01 | AV641599 | HCL037b04 | Beta-galactosidase                                             | synthetic construct               | 11.7  | 10.0  | 13.6  | 0.9 | 0.0 | 0.7 | 0.2 |
| 325 | 009c07 | AV390842 | CM087g01  | Beta-hydroxybutyrate dehydrogenase                             | <i>Ralstonia eutropha</i>         | 231.8 | 263.9 | 207.7 | 1.2 | 0.3 | 1.4 | 0.5 |
| 326 | 029g02 | AV631052 | LCL088b07 | Beta-ketoacyl-ACP synthase                                     | <i>Ricinus communis</i>           | 61.4  | 51.5  | 30.6  | 0.8 | 0.2 | 1.7 | 0.6 |
| 327 | 007a11 | AV391044 | CM050c03  | Beta-ketoacyl-ACP synthase                                     | <i>Ricinus communis</i>           | 23.4  | 21.6  | 16.9  | 0.9 | 0.1 | 1.3 | 0.3 |
| 328 | 168f10 | BP096656 | MXL062e06 | Beta-ketoacyl-ACP synthase                                     |                                   | 25.8  | 13.7  | 20.0  | 0.5 | 0.1 | 0.7 | 0.1 |
| 329 | 141f10 | AV624684 | LCL081b11 | Beta-ketoacyl-ACP synthase IIIA                                | <i>Perilla frutescens</i>         | 49.7  | 51.2  | 58.1  | 1.1 | 0.5 | 1.0 | 0.5 |
| 330 | 015f07 | AV641283 | HCL031a05 | Beta-ketoacyl-acyl carrier proteinsynthase III                 | <i>Porphyra purpurea</i>          | 19.5  | 14.5  | 13.8  | 0.8 | 0.3 | 1.1 | 0.2 |
| 331 | 158e11 | BP087666 | MX040h09  | Beta-tubulin                                                   | <i>Cynops pyrrhogaster</i>        | 172.1 | 303.5 | 166.7 | 1.8 | 0.2 | 1.9 | 0.6 |
| 332 | 154b11 | AV630853 | LCL085c01 | Beta-type carbonic anhydrase                                   | <i>Coccomyxa sp. PA</i>           | 23.7  | 25.5  | 35.4  | 1.1 | 0.1 | 0.8 | 0.2 |
| 333 | 168c02 | BP096374 | MXL057g01 | Beta-ureidopropionase                                          | <i>Arabidopsis thaliana</i>       | 5.9   | 16.5  | 14.2  | 3.2 | 1.3 | 1.3 | 0.4 |
| 334 | 008c12 | AV393279 | CM068g08  | Biotin carboxylase subunit                                     | <i>Arabidopsis thaliana</i>       | 15.7  | 27.5  | 24.0  | 1.8 | 0.1 | 1.1 | 0.1 |
| 335 | 028e12 | AV630134 | LCL073g08 | Biotin synthetase, putative                                    | <i>Thermotoga maritima</i>        | 1.2   | 1.6   | 1.2   | 1.4 | 0.3 | 1.3 | 0.3 |
| 336 | 133a07 | AV644928 | HCL095f05 | Biotin synthetase, putative                                    | <i>Thermotoga maritima</i>        | 16.1  | 15.5  | 13.6  | 1.0 | 0.3 | 1.2 | 0.4 |
| 337 | 125d04 | AV640604 | HCL019a05 | Biotin synthetase, putative                                    | <i>Thermotoga maritima</i>        | 17.9  | 15.8  | 15.3  | 0.9 | 0.1 | 1.0 | 0.2 |
| 338 | 022d08 | AV623785 | LC068f02  | Biotin-requiring enzyme                                        | <i>Arabidopsis thaliana</i>       | 67.2  | 64.0  | 50.8  | 0.9 | 0.1 | 1.3 | 0.5 |
| 339 | 019h10 | AV620515 | LC023b06  | Bithoraxoid-like protein                                       | <i>Rattus norvegicus</i>          | 8.8   | 14.6  | 13.6  | 1.8 | 0.5 | 1.1 | 0.4 |
| 340 | 034g03 | BP096184 | MXL054c01 | Brain-specific protein p25 alpha                               | <i>Homo sapiens</i>               | 11.2  | 14.7  | 12.4  | 1.3 | 0.2 | 1.3 | 0.5 |
| 341 | 118h12 | AV634469 | HC033g09  | Branched chain alpha-keto aciddehydrogenase E1 beta subunit    | <i>Arabidopsis thaliana</i>       | 7.9   | 7.2   | 8.6   | 0.9 | 0.4 | 0.8 | 0.3 |
| 342 | 135a09 | AV619672 | LC011f01  | Branched-chain alpha keto-acid dehydrogenase E1 alpha subunit  | <i>Arabidopsis thaliana</i>       | 25.1  | 32.1  | 20.9  | 1.3 | 0.3 | 1.6 | 0.7 |
| 343 | 144h08 | AV626429 | LCL008h06 | Branched-chain alpha-keto acid decarboxylase E1 beta subunit   | <i>Arabidopsis thaliana</i>       | 25.6  | 17.1  | 20.6  | 0.7 | 0.1 | 0.8 | 0.1 |
| 344 | 162h12 | BP094010 | MXL016h10 | Branching enzyme 3                                             | <i>Phaseolus vulgaris</i>         | 8.2   | 6.4   | 11.0  | 0.7 | 0.3 | 0.7 | 0.6 |
| 345 | 025c06 | AV627227 | LCL023a06 | BV-70/5                                                        | <i>Beta vulgaris</i>              | 45.7  | 38.5  | 41.9  | 0.9 | 0.1 | 0.9 | 0.1 |
| 346 | 115b05 | AV390690 | CM084h03  | BYJ6                                                           | <i>Nicotiana tabacum</i>          | 15.2  | 10.0  | 11.6  | 0.7 | 0.3 | 0.9 | 0.2 |
| 347 | 011h12 | AV635754 | HC050e02  | C23G10.2 gene product                                          | <i>Caenorhabditis elegans</i>     | 13.2  | 9.8   | 11.1  | 0.7 | 0.0 | 0.9 | 0.1 |
| 348 | 025g04 | AV627762 | LCL031f07 | C <sub>2</sub> H <sub>2</sub> zinc finger transcription factor | <i>Drosophila melanogaster</i>    | 11.8  | 12.9  | 15.7  | 1.1 | 0.3 | 0.8 | 0.2 |
| 349 | 035d01 | BP096958 | MXL067g04 | C54G7.4 gene product                                           | <i>Caenorhabditis elegans</i>     | 8.5   | 9.5   | 6.5   | 1.2 | 0.3 | 1.5 | 0.4 |
| 350 | 118e02 | AV633809 | HC025e08  | C54G7.4 gene product                                           | <i>Caenorhabditis elegans</i>     | 6.4   | 8.0   | 5.9   | 1.3 | 0.6 | 1.3 | 0.2 |
| 351 | 031h10 | BP087515 | MX036b12  | C-8,7 sterol isomerase; aS11                                   | <i>Arabidopsis thaliana</i>       | 6.0   | 7.1   | 11.3  | 1.2 | 0.2 | 0.6 | 0.1 |
| 352 | 035c09 | BP096910 | MXL066h09 | Ca pump isotaype 4                                             | <i>Rattus norvegicus</i>          | 14.6  | 15.3  | 12.3  | 1.0 | 0.1 | 1.3 | 0.2 |
| 353 | 014e01 | AV627802 | LCL032c05 | Ca <sup>2+</sup> -transporting ATPase                          |                                   | 83.3  | 98.3  | 74.4  | 1.2 | 0.3 | 1.3 | 0.3 |
| 354 | 036a06 | BP097635 | MXL078g11 | Calcium/calmodulin dependent protein kinase II subtype delta 5 | <i>Rattus norvegicus</i>          | 15.7  | 22.3  | 19.9  | 1.4 | 0.4 | 1.1 | 0.1 |
| 355 | 035f11 | BP097302 | MXL073c10 | Calcium ATPase                                                 | <i>Caenorhabditis elegans</i>     | 14.8  | 11.3  | 11.1  | 0.8 | 0.1 | 1.1 | 0.3 |
| 356 | 029f12 | AV631020 | LCL087f12 | Calcium-dependent protein kinase                               | <i>Zea mays</i>                   | 1.7   | 6.5   | 3.2   | 4.0 | 3.4 | 1.9 | 0.6 |
| 357 | 022a06 | AV623329 | LC062b10  | Calcium-dependent protein kinase                               | <i>Dunaliella tertiolecta</i>     | 32.0  | 31.7  | 19.2  | 1.0 | 0.1 | 1.6 | 0.1 |
| 358 | 138h10 | AV622723 | LC053f04  | Calcium-dependent protein kinase                               | <i>Arabidopsis thaliana</i>       | 19.6  | 43.2  | 27.2  | 2.3 | 1.1 | 1.6 | 0.5 |
| 359 | 029d03 | AV630796 | LCL084d09 | Calcium-dependent protein kinase                               | <i>Dunaliella tertiolecta</i>     | 31.5  | 28.8  | 22.2  | 1.0 | 0.3 | 1.4 | 0.6 |
| 360 | 024b05 | AV626360 | LCL007g08 | Calcium-dependent protein kinase                               | <i>Zea mays</i>                   | 64.8  | 61.4  | 46.1  | 1.0 | 0.3 | 1.3 | 0.1 |
| 361 | 012d07 | AV636796 | HC064c07  | Calcium-dependent protein kinase                               | <i>Zea mays</i>                   | 16.0  | 19.0  | 21.9  | 1.2 | 0.2 | 0.9 | 0.3 |
| 362 | 025h03 | AV627899 | LCL033f02 | Calcium-dependent protein kinase - like                        | <i>Arabidopsis thaliana</i>       | 19.7  | 33.9  | 22.8  | 1.9 | 1.1 | 1.5 | 0.4 |
| 363 | 029d11 | AV630849 | LCL085b07 | Calcium-dependent protein kinase - like                        | <i>Arabidopsis thaliana</i>       | 16.9  | 30.7  | 23.5  | 1.8 | 0.8 | 1.3 | 0.4 |
| 364 | 026b01 | AV628072 | LCL036c08 | Calcium-dependent protein kinase                               | <i>Arabidopsis thaliana</i>       | 4.5   | 10.1  | 4.9   | 2.5 | 1.6 | 2.0 | 0.4 |
| 365 | 023a05 | AV624579 | LC079f08  | Calmodulin                                                     | <i>Chlamydomonas reinhardtii</i>  | 122.3 | 140.8 | 89.3  | 1.1 | 0.3 | 1.7 | 0.8 |
| 366 | 122a02 | AV637732 | HC076g08  | Calmodulin mutant SYNCAM57C                                    | synthetic construct               | 9.1   | 8.3   | 6.6   | 0.9 | 0.1 | 1.3 | 0.3 |
| 367 | 028d10 | AV629946 | LCL069f04 | Calmodulin-domain protein kinase CDPK isoform 5                | <i>Arabidopsis thaliana</i>       | 19.1  | 22.6  | 27.0  | 1.2 | 0.2 | 0.9 | 0.2 |
| 368 | 020b11 | AV620831 | LC027d08  | Calreticulin                                                   | <i>Chlamydomonas reinhardtii</i>  | 91.7  | 42.2  | 52.9  | 0.5 | 0.2 | 0.9 | 0.4 |
| 369 | 108c12 | AV388203 | CM017h06  | Calreticulin                                                   | <i>Chlamydomonas reinhardtii</i>  | 43.5  | 18.6  | 27.5  | 0.5 | 0.2 | 0.7 | 0.0 |
| 370 | 028b04 | AV629643 | LCL062e10 | Calreticulin                                                   | <i>Chlamydomonas reinhardtii</i>  | 106.7 | 29.2  | 60.7  | 0.3 | 0.1 | 0.5 | 0.2 |
| 371 | 121b05 | AV636205 | HC056e03  | Caltractin, 20 kD calcium-binding protein                      | <i>Chlamydomonas reinhardtii</i>  | 96.1  | 81.2  | 74.7  | 0.9 | 0.1 | 1.1 | 0.1 |
| 372 | 011d05 | BP383699 | HC038a09  | cAMP phosphodiesterase                                         | <i>Rattus norvegicus</i>          | 72.5  | 108.1 | 93.2  | 1.5 | 0.1 | 1.2 | 0.1 |
| 373 | 011a08 | BP383695 | HC029c01  | cAMP phosphodiesterase 1                                       | <i>Rattus norvegicus</i>          | 15.8  | 16.2  | 17.9  | 1.0 | 0.2 | 0.9 | 0.2 |
| 374 | 023f02 | BP383824 | LC090a09  | cAMP-dependent protein kinase catalytic subunit                | <i>Ustilago maydis</i>            | 19.9  | 22.1  | 13.4  | 1.1 | 0.2 | 1.7 | 0.3 |
| 375 | 017g05 | BP383745 | HCL073b01 | cAMP-dependent protein kinase regulatory subunit               | <i>Blastocladiella emersonii</i>  | 7.2   | 9.1   | 7.4   | 1.4 | 0.3 | 1.2 | 0.4 |
| 376 | 167b10 | BP095941 | MXL049g06 | Carbamoyl phosphate synthetase large chain                     | <i>Arabidopsis thaliana</i>       | 16.3  | 42.1  | 20.4  | 2.7 | 0.5 | 2.3 | 0.8 |
| 377 | 030b01 | AV631381 | LCL092h12 | Carbamoyl phosphate synthetase large chain                     | <i>Arabidopsis thaliana</i>       | 22.0  | 39.1  | 21.2  | 1.8 | 0.2 | 1.9 | 0.4 |
| 378 | 040a02 | AV387156 | CM012h09  | Carbamoyl phosphate synthetase large chain                     | <i>Arabidopsis thaliana</i>       | 14.9  | 27.6  | 15.4  | 2.3 | 0.8 | 1.7 | 0.4 |
| 379 | 034g12 | BP096327 | MXL056g12 | Carbamoyl phosphate synthetase large subunit                   | <i>Zymomonas mobilis</i>          | 14.8  | 28.6  | 20.3  | 2.0 | 0.4 | 1.4 | 0.2 |
| 380 | 139c04 | AV622931 | LC056f11  | Carbamoyl phosphate synthetase small subunit                   | <i>Arabidopsis thaliana</i>       | 32.8  | 72.4  | 52.8  | 2.3 | 0.6 | 1.5 | 0.7 |
| 381 | 016g02 | AV642483 | HCL052f03 | Carbamoyl phosphate synthetase small subunit                   | <i>Arabidopsis thaliana</i>       | 35.1  | 70.7  | 63.4  | 2.2 | 0.8 | 1.2 | 0.4 |
| 382 | 130g09 | AV631381 | HCL074d07 | Carbamoyl phosphate synthetase, putative                       | <i>Arabidopsis thaliana</i>       | 15.1  | 36.8  | 22.1  | 2.4 | 0.1 | 1.6 | 0.3 |
| 383 | 135e11 | AV620045 | LC016h01  | Carbonic anhydrase                                             | <i>Chlamydomonas reinhardtii</i>  | 71.1  | 475.4 | 233.8 | 6.4 | 4.0 | 1.8 | 0.6 |
| 384 | 145c10 | AV626606 | LCL012b11 | Carboxyl-terminal protease                                     | <i>Synechocystis sp. PCC 6803</i> | 9.0   | 12.1  | 9.7   | 1.3 | 0.3 | 1.3 | 0.3 |
| 385 | 029e11 | AV630932 | LCL086e04 | Carboxyltransferase alpha subunit                              | <i>Synechococcus PCC7942</i>      | 72.8  | 50.1  | 69.2  | 0.7 | 0.2 | 0.7 | 0.3 |
| 386 | 113f06 | BP383677 | CM069d02  | Carboxypeptidase II                                            | <i>Vigna radiata</i>              | 8.8   | 23.7  | 17.5  | 2.6 | 0.5 | 1.3 | 0.2 |
| 387 | 133g12 | AV645221 | HCL099g10 | Carnitine acetyl transferase FacC                              | <i>Emericella nidulans</i>        | 3.4   | 3.8   | 3.1   | 1.1 | 0.3 | 1.2 | 0.3 |
| 388 | 114h09 | AV390251 | CM082b10  | Casein kinase I                                                | <i>Arabidopsis thaliana</i>       | 23.1  | 24.2  | 23.9  | 1.1 | 0.2 | 1.0 | 0.2 |
| 389 | 139a11 | AV622802 | LC054g09  | Casein kinase II alpha subunit                                 | <i>Arabidopsis thaliana</i>       | 11.0  | 8.7   | 7.3   | 0.8 | 0.1 | 1.2 | 0.1 |
| 390 | 030e08 | AV631745 | LCL099a12 | Casein kinase II alpha subunit                                 | <i>Arabidopsis thaliana</i>       | 10.1  | 7.9   | 7.9   | 0.8 | 0.1 | 1.1 | 0.5 |
| 391 | 005e12 | AV387534 | CM026d06  | Casein kinase II beta subunit                                  | <i>Arabidopsis thaliana</i>       | 10.3  | 8.8   | 12.5  | 0.9 | 0.4 | 1.0 | 0.8 |
| 392 | 140c07 | AV623726 | LC067g12  | CaSm                                                           | <i>Homo sapiens</i>               | 8.8   | 9.0   | 7.8   | 1.0 | 0.2 | 1.1 | 0.2 |
| 393 | 036c07 | BP097974 | MXL084d12 | Catalase                                                       | <i>Chlamydomonas reinhardtii</i>  | 54.3  | 48.8  | 32.6  | 0.9 | 0.1 | 1.7 | 0.8 |
| 394 | 007b12 | AV391290 | CM052h09  | Cathepsin                                                      | <i>Mus musculus</i>               | 12.1  | 8.1   | 13.2  | 0.7 | 0.1 | 0.6 | 0.2 |
| 395 | 027c12 | AV629113 | LCL052c05 | Cation-transporting ATPase PAT1                                | <i>Mus musculus</i>               | 16.5  | 12.6  | 12.9  | 0.8 | 0.1 | 1.0 | 0.1 |
| 396 | 010a01 | AV632044 | HC003b12  | CCAAT-binding transcription factor subunit A                   | <i>Arabidopsis thaliana</i>       | 13.0  | 19.8  | 13.1  | 1.5 | 0.1 | 1.5 | 0.4 |
| 397 | 029b03 | BP383844 | LCL081f03 | Com1                                                           |                                   | 2.6   | 2.3   | 2.2   | 1.0 | 0.5 | 1.2 | 0.7 |
| 398 | 022h01 | AV624318 | LC076a12  | CCR4-associatedfactor 1                                        | <i>Arabidopsis thaliana</i>       | 11.6  | 12.7  | 13.8  | 1.1 | 0.1 | 1.0 | 0.3 |
| 399 | 112h02 | AV392347 | CM061a11  | Ccs1                                                           | <i>Chlamydomonas reinhardtii</i>  | 4.7   | 4.8   | 5.2   | 1.0 | 0.2 | 0.9 | 0.1 |
| 400 | 031d03 | BP086790 | MX016h01  | Cct-6                                                          | <i>Caenorhabditis elegans</i>     | 8.6   | 5.3   | 6.0   | 0.7 | 0.2 | 1.1 | 0.7 |
| 401 | 032f10 | BP093540 | MXL009h   |                                                                |                                   |       |       |       |     |     |     |     |



|     | A      | B        | C         | D                                                                 | E                                        | F     | G     | H     | I    | J    | K   | L   |
|-----|--------|----------|-----------|-------------------------------------------------------------------|------------------------------------------|-------|-------|-------|------|------|-----|-----|
| 426 | 135d10 | AV619833 | LC015f01  | CGI-110 protein                                                   | <i>Arabidopsis thaliana</i>              | 11.0  | 15.2  | 10.0  | 1.4  | 0.2  | 1.6 | 0.3 |
| 427 | 114a01 | AV388662 | CM072a02  | CGI-137 protein                                                   | <i>Homo sapiens</i>                      | 6.8   | 5.5   | 5.7   | 0.9  | 0.5  | 1.0 | 0.2 |
| 428 | 019a10 | AV619493 | LC009a09  | CGI-25 protein                                                    | <i>Homo sapiens</i>                      | 10.0  | 9.8   | 5.7   | 1.2  | 0.6  | 1.8 | 0.4 |
| 429 | 109f05 | AV387998 | CM028b10  | CGI-32 protein                                                    | <i>Homo sapiens</i>                      | 12.8  | 8.4   | 9.6   | 0.7  | 0.1  | 0.9 | 0.2 |
| 430 | 109c03 | AV388134 | CM025a01  | CGI-37 protein                                                    | <i>Homo sapiens</i>                      | 11.0  | 7.6   | 7.1   | 0.7  | 0.1  | 1.1 | 0.3 |
| 431 | 137g05 | AV621850 | LC041g03  | CGI-46 protein                                                    | <i>Homo sapiens</i>                      | 11.6  | 10.5  | 12.3  | 1.0  | 0.3  | 0.9 | 0.2 |
| 432 | 149b06 | AV628632 | LCL044h01 | CGI-53 protein                                                    | <i>Homo sapiens</i>                      | 25.9  | 31.8  | 28.1  | 1.2  | 0.1  | 1.2 | 0.3 |
| 433 | 030f06 | BP383849 | LCL100f11 | cGMP-dependent protein kinase 1 alpha isozyme                     | <i>Homo sapiens</i>                      | 5.2   | 5.0   | 4.9   | 1.0  | 0.3  | 1.0 | 0.1 |
| 434 | 019h08 | AV620477 | LC022f09  | Chain A, human glutathione S-transferase P1-1                     | <i>Homo sapiens</i>                      | 26.2  | 16.6  | 19.6  | 0.6  | 0.0  | 0.9 | 0.4 |
| 435 | 029h08 | AV631153 | LCL089e12 | Chain A, phosphorylated form of yeast glycogen phosphorylase with | <i>Aspergillus fumigatus</i>             | 26.6  | 26.9  | 28.7  | 1.0  | 0.2  | 0.9 | 0.1 |
| 436 | 152g02 | AV630092 | LCL073a01 | Chain A, structure of E6ap                                        | <i>Homo sapiens</i>                      | 4.4   | 4.1   | 4.6   | 1.0  | 0.3  | 0.9 | 0.2 |
| 437 | 122a10 | AV637832 | HC078b07  | Chain A, structures of adenylosuccinate synthetase                | <i>Triticum aestivum</i>                 | 71.8  | 64.2  | 48.3  | 0.9  | 0.1  | 1.5 | 0.7 |
| 438 | 016g01 | AV642474 | HCL052e01 | Chain A, thermotoga maritima glutamate dehydrogenase              | <i>Ulva pertusa</i>                      | 12.4  | 17.4  | 14.0  | 1.6  | 0.8  | 1.2 | 0.3 |
| 439 | 029f04 | AV630948 | LCL086g05 | Chain B, mouse gabp alpha                                         | <i>Mus musculus</i>                      | 13.6  | 12.0  | 10.6  | 0.9  | 0.2  | 1.2 | 0.4 |
| 440 | 012h07 | AV637631 | HC075f02  | Chaperonin 10                                                     | <i>Spinacia oleracea</i>                 | 17.1  | 9.0   | 11.4  | 0.5  | 0.1  | 0.8 | 0.1 |
| 441 | 012a12 | AV636074 | HC054h03  | Chaperonin 60 alpha chain precursor, Chloroplast                  | <i>Chlamydomonas reinhardtii</i>         | 38.7  | 16.8  | 15.6  | 0.4  | 0.1  | 1.1 | 0.1 |
| 442 | 035a04 | BP096510 | MXL059h05 | Chaperonin alpha-like subunit                                     | <i>Chlamydomonas reinhardtii</i>         | 62.7  | 21.3  | 21.8  | 0.4  | 0.1  | 1.0 | 0.4 |
| 443 | 165e06 | BP095237 | MXL038f03 | Chaperonin alpha-like subunit                                     | <i>Chlamydomonas reinhardtii</i>         | 53.1  | 24.3  | 27.2  | 0.5  | 0.3  | 0.9 | 0.3 |
| 444 | 006h05 | AV390623 | CM047c01  | Chaperonin beta-like subunit                                      | <i>Chlamydomonas reinhardtii</i>         | 42.3  | 14.8  | 16.6  | 0.4  | 0.2  | 0.9 | 0.1 |
| 445 | 004b02 | AV397884 | CM002h12  | Chaperonin-60 beta subunit                                        | <i>Solanum tuberosum</i>                 | 24.1  | 18.7  | 13.0  | 0.8  | 0.4  | 1.4 | 0.4 |
| 446 | 035c08 | BP096879 | MXL066c09 | CHE-2 protein                                                     | <i>Caenorhabditis elegans</i>            | 19.8  | 18.2  | 22.3  | 0.9  | 0.1  | 0.8 | 0.1 |
| 447 | 025b10 | AV627152 | LCL021h08 | Chimeric AFGP/trypsinogen-like serine protease precursor          | <i>Dissostichus mawsoni</i>              | 52.5  | 92.0  | 42.2  | 1.7  | 0.1  | 2.2 | 0.2 |
| 448 | 166j12 | BP095777 | MXL047c04 | Chimeric AFGP/trypsinogen-like serine protease precursor          | <i>Dissostichus mawsoni</i>              | 34.7  | 59.6  | 37.2  | 1.7  | 0.1  | 1.6 | 0.2 |
| 449 | 006g02 | AV390385 | CM045g06  | Chitinase                                                         |                                          | 16.1  | 23.5  | 16.1  | 1.5  | 0.4  | 1.5 | 0.1 |
| 450 | 005c12 | AV387825 | CM022e06  | Chlamyopsin                                                       | <i>Chlamydomonas reinhardtii</i>         | 44.5  | 51.4  | 48.7  | 1.2  | 0.1  | 1.1 | 0.1 |
| 451 | 002f05 | AV395607 | CL44c09   | Chlamyopsin                                                       | <i>Chlamydomonas reinhardtii</i>         | 37.0  | 60.8  | 68.1  | 1.6  | 0.2  | 0.9 | 0.1 |
| 452 | 159h09 | BP088195 | MX053g08  | Chlamyopsin                                                       | <i>Chlamydomonas reinhardtii</i>         | 76.4  | 62.9  | 95.3  | 0.8  | 0.5  | 0.6 | 0.2 |
| 453 | 150g03 | AV629131 | LCL052g03 | Chlorophyll a oxygenase                                           | <i>Chlamydomonas reinhardtii</i>         | 24.5  | 21.3  | 26.8  | 0.9  | 0.1  | 0.8 | 0.2 |
| 454 | 121e08 | AV637269 | HC070h07  | Chlorophyll a oxygenase                                           | <i>Chlamydomonas reinhardtii</i>         | 13.6  | 9.6   | 15.4  | 0.7  | 0.3  | 0.6 | 0.1 |
| 455 | 133c05 | AU301234 | HCL098f11 | Chlorophyll a/b binding protein 4, chloroplast precursor          | <i>Arabidopsis thaliana</i>              | 122.5 | 67.9  | 134.8 | 0.5  | 0.1  | 0.5 | 0.3 |
| 456 | 008a09 | AV392784 | CM063h05  | Chlorophyll a/b binding protein 4, chloroplast precursor          | <i>Arabidopsis thaliana</i>              | 89.3  | 51.5  | 102.7 | 0.5  | 0.3  | 0.5 | 0.2 |
| 457 | 138b10 | AV622124 | LC045d09  | Chlorophyll a/b-binding protein                                   | <i>Chlamydomonas reinhardtii</i>         | 334.7 | 246.9 | 279.8 | 0.7  | 0.2  | 1.0 | 0.5 |
| 458 | 020g04 | AV621413 | LC035g04  | Chlorophyll a/b-binding protein                                   | <i>Pinus sylvestris</i>                  | 13.3  | 13.9  | 14.9  | 1.0  | 0.3  | 0.9 | 0.3 |
| 459 | 021b10 | AV622064 | LC044e12  | Chlorophyll a/b-binding protein                                   | <i>Chlamydomonas reinhardtii</i>         | 383.2 | 240.9 | 331.8 | 0.6  | 0.2  | 0.8 | 0.5 |
| 460 | 119c12 | AV634892 | HC039d01  | Chlorophyll a/b-binding protein                                   | <i>Chlamydomonas reinhardtii</i>         | 126.1 | 102.9 | 115.8 | 0.8  | 0.1  | 0.9 | 0.4 |
| 461 | 135e04 | AV620007 | LC016b06  | Chlorophyll a/b-binding protein homolog LI818r-1                  | <i>Chlamydomonas reinhardtii</i>         | 46.3  | 342.4 | 142.8 | 8.3  | 3.0  | 2.6 | 1.2 |
| 462 | 155d01 | AV631388 | LCL093a12 | Chlorophyll a/b-binding protein homolog LI818r-1                  | <i>Chlamydomonas reinhardtii</i>         | 22.9  | 203.6 | 85.4  | 10.1 | 5.5  | 2.4 | 0.2 |
| 463 | 158b03 | BP087655 | MX040d11  | Chlorophyll a/b-binding protein homolog LI818r-1                  | <i>Chlamydomonas reinhardtii</i>         | 10.6  | 232.0 | 120.0 | 22.4 | 4.3  | 2.0 | 0.2 |
| 464 | 144d03 | AV626238 | LCL004h07 | Chlorophyll a/b-binding protein homolog LI818r-1                  | <i>Chlamydomonas reinhardtii</i>         | 12.0  | 201.8 | 129.3 | 16.9 | 1.3  | 1.9 | 0.9 |
| 465 | 135g04 | AU301237 | LC018h11  | Chlorophyll a/b-binding protein homolog LI818r-1                  | <i>Chlamydomonas reinhardtii</i>         | 9.0   | 145.1 | 85.2  | 15.6 | 4.1  | 1.7 | 0.2 |
| 466 | 019b05 | AV619622 | LC010h06  | Chlorophyll a/b-binding protein homolog LI818r-1                  | <i>Chlamydomonas reinhardtii</i>         | 7.0   | 113.1 | 73.6  | 17.2 | 5.3  | 1.6 | 0.3 |
| 467 | 141b10 | AV624334 | LC076c10  | Chlorophyll a/b-binding protein homolog LI818r-1                  | <i>Chlamydomonas reinhardtii</i>         | 25.0  | 63.8  | 53.0  | 2.5  | 0.3  | 1.4 | 0.8 |
| 468 | 158g07 | BP087696 | MX041f09  | Chlorophyll a/b-binding protein homolog LI818r-1                  | <i>Chlamydomonas reinhardtii</i>         | 7.3   | 94.2  | 70.2  | 13.8 | 7.5  | 1.3 | 0.4 |
| 469 | 006g01 | AV390359 | CM045d09  | Chlorophyll a/b-binding protein type II, photosystem I            | <i>Lolium temulentum</i>                 | 161.7 | 127.1 | 163.6 | 0.8  | 0.3  | 0.8 | 0.3 |
| 470 | 134h08 | AU301236 | LC009h08  | Chlorophyll a/b-binding protein type III precursor                | <i>Lycopersicon esculentum</i>           | 342.1 | 272.3 | 296.4 | 0.8  | 0.1  | 0.9 | 0.1 |
| 471 | 156e03 | BP086151 | MX002h01  | Chlorophyll a/b-binding protein type III precursor                | <i>Lycopersicon esculentum</i>           | 392.9 | 294.2 | 344.2 | 0.7  | 0.2  | 0.8 | 0.3 |
| 472 | 009f12 | AV392486 | CM097a12  | Chlorophyll a/b-binding protein type III precursor                | <i>Lycopersicon esculentum</i>           | 196.7 | 100.6 | 169.9 | 0.5  | 0.0  | 0.6 | 0.1 |
| 473 | 114e01 | AV388010 | CM077d05  | Chlorophyll synthase 33 kD subunit                                | <i>Synechocystis sp. PCC 6803</i>        | 16.4  | 11.6  | 14.0  | 0.7  | 0.1  | 0.8 | 0.3 |
| 474 | 114c10 | AV389439 | CM075d06  | Chlorophyll synthase 33 kD subunit                                | <i>Synechocystis sp. PCC 6803</i>        | 31.1  | 22.5  | 27.2  | 0.7  | 0.1  | 0.8 | 0.2 |
| 475 | 139f12 | AV623307 | LC061h08  | Chloroplast 30S ribosomal protein S10                             | <i>Porphyra purpurea</i>                 | 123.1 | 50.7  | 51.7  | 0.4  | 0.2  | 1.0 | 0.8 |
| 476 | 120c09 | AV635933 | HC052h07  | Chloroplast 50S ribosomal protein L1                              | <i>Thermosynechococcus elongatus BP-</i> | 90.1  | 49.0  | 60.1  | 0.5  | 0.1  | 1.0 | 0.6 |
| 477 | 007f08 | AV392143 | CM058e05  | Chloroplast 50S ribosomal protein L21                             | <i>Odontella sinensis</i>                | 54.7  | 26.1  | 42.0  | 0.5  | 0.2  | 0.6 | 0.3 |
| 478 | 036b08 | BP097885 | MXL082h10 | Chloroplast 50S ribosomal protein L27                             | <i>Arabidopsis thaliana</i>              | 109.5 | 59.9  | 65.0  | 0.5  | 0.1  | 1.0 | 0.7 |
| 479 | 024c01 | AV626401 | LCL008e04 | Chloroplast carbonic anhydrase                                    | <i>Chlamydomonas reinhardtii</i>         | 53.4  | 108.5 | 90.4  | 2.1  | 0.4  | 1.2 | 0.2 |
| 480 | 014e04 | AV640090 | HCL010b09 | Chloroplast EF-G                                                  | <i>Pisum sativum</i>                     | 32.7  | 20.8  | 24.9  | 0.7  | 0.2  | 0.8 | 0.1 |
| 481 | 159c11 | BP087769 | MX043c04  | Chloroplast heat shock 22kD protein                               | <i>Chlamydomonas reinhardtii</i>         | 4.6   | 5.4   | 4.5   | 1.3  | 0.6  | 1.5 | 1.1 |
| 482 | 030g10 | BP086189 | MX003f04  | Chloroplast heat shock 22kD protein                               | <i>Chlamydomonas reinhardtii</i>         | 7.6   | 6.2   | 7.8   | 0.8  | 0.1  | 0.8 | 0.2 |
| 483 | 018c05 | AV644334 | HCL086e11 | Chloroplast inner envelope protein, 110kD                         | <i>Pisum sativum</i>                     | 15.4  | 10.6  | 14.9  | 0.7  | 0.0  | 0.8 | 0.2 |
| 484 | 022b07 | AV623489 | LC064e11  | Chloroplast membrane protein, Ccp1                                | <i>Chlamydomonas reinhardtii</i>         | 7.4   | 287.2 | 175.6 | 38.4 | 14.0 | 1.6 | 0.1 |
| 485 | 017d10 | AV643229 | HCL066a06 | Chloroplast mRNA-binding protein CSP41 precursor                  | <i>Spinacia oleracea</i>                 | 21.4  | 25.8  | 29.7  | 1.2  | 0.2  | 0.9 | 0.1 |
| 486 | 032f03 | BP093485 | MXL009a09 | Chloroplast ppGpp synthase/degradase                              | <i>Chlamydomonas reinhardtii</i>         | 24.4  | 54.0  | 35.4  | 2.6  | 1.4  | 1.5 | 0.3 |
| 487 | 153a10 | AV630302 | LCL078h10 | Chloroplast processing enzyme                                     | <i>Arabidopsis thaliana</i>              | 14.1  | 14.7  | 10.6  | 1.0  | 0.1  | 1.4 | 0.1 |
| 488 | 016g05 | AV642501 | HCL052h10 | Chloroplast processing enzyme                                     | <i>Arabidopsis thaliana</i>              | 7.4   | 8.2   | 7.8   | 1.2  | 0.2  | 1.0 | 0.3 |
| 489 | 007h07 | AV392506 | CM061h06  | Chloroplast ribosomal protein L10                                 | <i>Nicotiana tabacum</i>                 | 49.3  | 24.3  | 40.7  | 0.5  | 0.1  | 0.7 | 0.3 |
| 490 | 025h01 | AV627885 | LCL033d03 | Chloroplast ribosomal protein L17                                 | <i>Nicotiana tabacum</i>                 | 45.6  | 24.9  | 26.0  | 0.5  | 0.1  | 1.0 | 0.6 |
| 491 | 001h10 | AV394684 | CL27c02   | Chloroplast SecA homolog                                          | <i>Zea mays</i>                          | 6.2   | 3.9   | 5.9   | 0.6  | 0.1  | 0.7 | 0.2 |
| 492 | 009b02 | AV390357 | CM083g10  | Chloroplast w6 desaturase                                         | <i>Chlamydomonas reinhardtii</i>         | 36.9  | 54.2  | 60.0  | 1.6  | 0.7  | 0.9 | 0.3 |
| 493 | 130d02 | AV643413 | HCL069c06 | Chorismate synthase                                               | <i>Lycopersicon esculentum</i>           | 11.4  | 6.4   | 7.0   | 0.6  | 0.1  | 1.0 | 0.3 |
| 494 | 148a10 | AV627826 | LCL032f02 | Chromate resistance protein homolog                               | <i>Vibrio cholerae</i>                   | 10.4  | 29.5  | 20.1  | 2.9  | 0.5  | 1.5 | 0.1 |
| 495 | 027c09 | AV629105 | LCL052b03 | Chromosome-associated protein-E homolog                           | <i>Arabidopsis thaliana</i>              | 14.3  | 11.1  | 13.0  | 0.8  | 0.1  | 1.0 | 0.6 |
| 496 | 128d04 | AV642247 | HCL048c09 | Chromosome-associated protein-E homolog                           | <i>Arabidopsis thaliana</i>              | 15.1  | 14.1  | 17.9  | 1.0  | 0.2  | 0.8 | 0.1 |
| 497 | 152c11 | AV629976 | LCL070c10 | Cinnamyl alcohol dehydrogenase-like protein, subunit b            | <i>Arabidopsis thaliana</i>              | 115.2 | 110.8 | 80.2  | 1.0  | 0.3  | 1.7 | 0.9 |
| 498 | 027a03 | AV628738 | LCL046d07 | Citrate synthase                                                  | <i>Daucus carota</i>                     | 41.0  | 32.1  | 27.6  | 0.8  | 0.2  | 1.3 | 0.6 |
| 499 | 139e03 | AV623120 | LC059j10  | Citrate synthase                                                  | <i>Arabidopsis thaliana</i>              | 47.3  | 29.2  | 37.9  | 0.6  | 0.1  | 0.9 | 0.4 |
| 500 | 021c03 | AV622115 | LC045c09  | Citrate synthase, glycoisomeric                                   | <i>Arabidopsis thaliana</i>              | 145.0 | 142.1 | 116.3 | 1.0  | 0.1  | 1.5 | 0.9 |
| 501 | 004g01 | AV387175 | CM012h05  | Cks1 protein                                                      | <i>Arabidopsis thaliana</i>              | 20.1  | 20.2  | 11.6  | 1.4  | 0.6  | 1.7 | 0.5 |
| 502 | 005h09 | AV388735 | CM031f08  | Class III ADH enzyme                                              | <i>Oryza sativa</i>                      | 36.5  | 19.6  | 33.8  | 0.5  | 0.1  | 0.6 | 0.3 |
| 503 | 028b10 | AV630290 | LCL076g05 | Claithrin adaptor protein small chain subunit                     | <i>Arabidopsis thaliana</i>              | 15.1  | 12.9  | 12.9  | 0.9  | 0.2  | 1.0 | 0.1 |
| 504 | 107d06 | AV397707 | CM009e10  | Claithrin assembly protein AP19                                   | <i>Arabidopsis thaliana</i>              | 8.2   | 10.5  | 7.7   | 1.3  | 0.2  | 1.4 | 0.2 |
| 505 | 144a04 | AV626071 | LCL001h12 | Claithrin coat assembly like protein                              | <i>Arabidopsis thaliana</i>              | 29.2  | 25.8  | 20.5  | 0.9  | 0.1  | 1.3 | 0.1 |
| 506 | 137c12 | AV621472 | LC036f03  | Claith                                                            |                                          |       |       |       |      |      |     |     |

|     | A      | B        | C         | D                                                                  | E                                            | F     | G     | H     | I   | J   | K   | L   |
|-----|--------|----------|-----------|--------------------------------------------------------------------|----------------------------------------------|-------|-------|-------|-----|-----|-----|-----|
| 533 | 020d03 | AV620953 | LC029b07  | CP26                                                               | <i>Chlamydomonas reinhardtii</i>             | 610.2 | 286.0 | 421.0 | 0.4 | 0.3 | 0.6 | 0.3 |
| 534 | 112e11 | AV391995 | CM058a02  | CP26                                                               | <i>Chlamydomonas reinhardtii</i>             | 237.0 | 127.9 | 203.2 | 0.5 | 0.3 | 0.6 | 0.2 |
| 535 | 011d11 | AV634903 | HC039e01  | CP26                                                               | <i>Chlamydomonas reinhardtii</i>             | 274.5 | 127.9 | 304.3 | 0.4 | 0.2 | 0.4 | 0.1 |
| 536 | 140h11 | AV624149 | LC073f02  | CPase I A                                                          | <i>Hordeum vulgare</i> var. <i>distichum</i> | 9.5   | 19.8  | 18.3  | 2.1 | 0.2 | 1.1 | 0.2 |
| 537 | 006c10 | AV389682 | CM039a05  | CPH1 gene product                                                  | <i>Chlamydomonas reinhardtii</i>             | 7.3   | 9.3   | 8.0   | 1.3 | 0.4 | 1.2 | 0.4 |
| 538 | 123e12 | AV639636 | HCL020c01 | CPH1 gene product                                                  | <i>Chlamydomonas reinhardtii</i>             | 20.4  | 16.8  | 23.8  | 0.8 | 0.1 | 0.7 | 0.2 |
| 539 | 009f10 | AV392559 | CM096h09  | Cpn21 protein                                                      | <i>Arabidopsis thaliana</i>                  | 39.3  | 17.7  | 20.8  | 0.4 | 0.1 | 0.9 | 0.2 |
| 540 | 022g11 | AV624295 | LC075g02  | cr-19b23                                                           | <i>Chlamydomonas reinhardtii</i>             | 8.9   | 21.0  | 14.9  | 2.3 | 0.3 | 1.4 | 0.2 |
| 541 | 006c08 | AV619886 | LC013a07  | CRANT for mitochondrial ADP/ATP translocator protein               | <i>Chlamydomonas reinhardtii</i>             | 100.3 | 55.6  | 60.7  | 0.5 | 0.3 | 1.1 | 0.8 |
| 542 | 034h03 | BP096342 | MXL057b02 | BRE protein                                                        | <i>Brucella melitensis</i>                   | 18.2  | 16.1  | 19.5  | 1.0 | 0.5 | 0.8 | 0.2 |
| 543 | 029e08 | AV630919 | LCL086c12 | CROC-1-like protein                                                | <i>Picea mariana</i>                         | 40.1  | 30.6  | 30.4  | 0.8 | 0.1 | 1.0 | 0.2 |
| 544 | 120h07 | AV636521 | HC060e12  | CRTK protein                                                       | <i>Rhodobacter capsulatus</i>                | 7.0   | 5.6   | 5.2   | 0.8 | 0.0 | 1.1 | 0.2 |
| 545 | 153h12 | AV630741 | LCL083f01 | Cullin 4A                                                          | <i>Homo sapiens</i>                          | 18.0  | 19.0  | 22.4  | 1.1 | 0.1 | 0.9 | 0.4 |
| 546 | 030g08 | BP086166 | MX003b11  | Cyanoglobin                                                        | <i>Synechocystis</i> sp. <i>PCC 6803</i>     | 7.3   | 5.0   | 5.7   | 0.7 | 0.1 | 0.9 | 0.2 |
| 547 | 158h07 | BP087711 | MX042a03  | Cyanoglobin                                                        | <i>Synechocystis</i> sp. <i>PCC 6803</i>     | 3.8   | 2.0   | 3.9   | 0.5 | 0.4 | 0.7 | 0.6 |
| 548 | 166b06 | BP095479 | MXL042e05 | Cyclin 2a protein                                                  | <i>Arabidopsis thaliana</i>                  | 32.8  | 45.7  | 25.9  | 1.4 | 0.3 | 1.8 | 0.4 |
| 549 | 014h09 | AV640544 | HCL018a11 | Cyclophilin                                                        | <i>Entamoeba histolytica</i>                 | 58.3  | 60.1  | 74.4  | 1.0 | 0.2 | 0.8 | 0.1 |
| 550 | 021e10 | AV622566 | LC051c10  | Cyclophilin                                                        | <i>Trichophyton mentagrophytes</i>           | 28.5  | 22.6  | 37.3  | 0.8 | 0.2 | 0.6 | 0.1 |
| 551 | 036b06 | BP097831 | MXL082a09 | Cyclophilin                                                        | <i>Arabidopsis thaliana</i>                  | 67.1  | 51.4  | 90.2  | 0.8 | 0.1 | 0.6 | 0.1 |
| 552 | 027d07 | AV629174 | LCL053f10 | Cyclophilin 1                                                      | <i>Chlamydomonas reinhardtii</i>             | 139.9 | 119.9 | 143.6 | 0.9 | 0.0 | 0.9 | 0.4 |
| 553 | 034g01 | BP096176 | MXL054a12 | Cyclophilin B                                                      | <i>Dictyostelium discoideum</i>              | 62.3  | 59.5  | 71.5  | 1.0 | 0.1 | 0.9 | 0.2 |
| 554 | 005d04 | AV387820 | CM023f08  | Cyclophilin B                                                      | <i>Dictyostelium discoideum</i>              | 7.8   | 8.7   | 10.3  | 1.1 | 0.2 | 0.8 | 0.1 |
| 555 | 035a12 | BP096572 | MXL060h12 | Cyclophilin DiCyp-2                                                | <i>Dirofilaria immitis</i>                   | 32.5  | 33.5  | 35.5  | 1.0 | 0.1 | 0.9 | 0.1 |
| 556 | 026d07 | AV628310 | LCL039h06 | Cyclophilin OvCyp-2                                                | <i>Onchocerca volvulus</i>                   | 30.8  | 20.1  | 35.3  | 0.7 | 0.1 | 0.6 | 0.0 |
| 557 | 032g06 | BP093606 | MXL010g11 | CYP1                                                               | <i>Lycopodium esculentum</i>                 | 16.8  | 39.9  | 47.1  | 2.5 | 1.3 | 0.8 | 0.2 |
| 558 | 112d12 | AV391872 | CM057b07  | CYP97B2p                                                           | <i>Glycine max</i>                           | 16.5  | 13.5  | 9.5   | 0.8 | 0.2 | 1.4 | 0.4 |
| 559 | 014b03 | AV639748 | HCL004c10 | Cys3His zinc finger protein isolog                                 | <i>Arabidopsis thaliana</i>                  | 1.2   | 1.3   | 0.8   | 1.3 | 0.8 | 1.7 | 0.5 |
| 560 | 129f01 | AV642944 | HCL061a06 | Cys3His zinc finger protein isolog                                 | <i>Arabidopsis thaliana</i>                  | 16.7  | 17.3  | 14.0  | 1.0 | 0.1 | 1.2 | 0.2 |
| 561 | 120h11 | AV636561 | HC061b04  | CYSP protein                                                       | <i>Shewanella oneidensis MR-1</i>            | 14.9  | 12.2  | 14.4  | 0.8 | 0.1 | 0.8 | 0.1 |
| 562 | 129b09 | AV642714 | HCL056e12 | Cystathionine beta-lyase                                           | <i>Arabidopsis thaliana</i>                  | 9.1   | 8.4   | 9.4   | 0.9 | 0.2 | 0.9 | 0.1 |
| 563 | 139d04 | AV623037 | LC058a12  | Cystine synthase, chloroplast                                      | <i>Spinacia oleracea</i>                     | 6.8   | 6.9   | 7.6   | 1.0 | 0.2 | 0.9 | 0.1 |
| 564 | 120d09 | AV636023 | HC054b06  | Cysteine proteinase precursor                                      | <i>Myxine glutinosa</i>                      | 16.4  | 18.8  | 18.4  | 1.2 | 0.3 | 1.0 | 0.1 |
| 565 | 157e10 | BP087035 | MX023d08  | Cysteine proteinase RD21A                                          | <i>Arabidopsis thaliana</i>                  | 10.2  | 30.5  | 33.0  | 3.1 | 1.2 | 0.9 | 0.1 |
| 566 | 020a02 | AV620657 | LC025b01  | Cysteine proteinase RD21A                                          | <i>Arabidopsis thaliana</i>                  | 20.0  | 38.5  | 44.9  | 2.0 | 1.2 | 0.8 | 0.3 |
| 567 | 158e01 | BP087653 | MX040d06  | Cytochrome b6/f complex 4 kD subunit                               | <i>Chlamydomonas reinhardtii</i>             | 69.2  | 97.8  | 68.3  | 1.4 | 0.2 | 1.5 | 0.8 |
| 568 | 120c03 | AV635909 | HC052e10  | Cytochrome b6/f complex iron-sulfur subunit                        | <i>Chlamydomonas reinhardtii</i>             | 87.4  | 107.7 | 100.7 | 1.3 | 0.4 | 1.3 | 0.8 |
| 569 | 142h07 | AV625509 | LC093h06  | Cytochrome b6/f complex iron-sulfur subunit                        | <i>Chlamydomonas reinhardtii</i>             | 144.0 | 160.8 | 170.6 | 1.1 | 0.3 | 1.3 | 0.9 |
| 570 | 006d10 | AV389929 | CM040g12  | Cytochrome b6/f complex iron-sulfur subunit                        | <i>Chlamydomonas reinhardtii</i>             | 80.6  | 86.6  | 105.0 | 1.1 | 0.2 | 0.9 | 0.4 |
| 571 | 120g09 | AV636430 | HC059d04  | Cytochrome b6f-associated phosphoprotein                           | <i>Chlamydomonas reinhardtii</i>             | 53.1  | 26.0  | 33.9  | 0.5 | 0.2 | 0.9 | 0.5 |
| 572 | 008c03 | AV393137 | CM067g11  | Cytochrome b6f-associated phosphoprotein precursor                 | <i>Chlamydomonas</i> sp. <i>HS-5</i>         | 44.0  | 29.2  | 32.9  | 0.7 | 0.5 | 1.0 | 0.6 |
| 573 | 115d10 | AV390940 | CM088b10  | Cytochrome b6f-associated phosphoprotein precursor                 | <i>Chlamydomonas reinhardtii</i>             | 44.6  | 27.8  | 39.9  | 0.6 | 0.3 | 0.8 | 0.4 |
| 574 | 020a03 | AV620661 | LC025b06  | Cytochrome c oxidase copper chaperone                              | <i>Chlamydomonas reinhardtii</i>             | 14.9  | 10.9  | 11.3  | 0.7 | 0.1 | 1.0 | 0.2 |
| 575 | 113d11 | AV393142 | CM067h05  | Cytochrome c oxidase subunit 6b                                    | <i>Oryza sativa</i>                          | 172.8 | 183.8 | 242.9 | 1.1 | 0.4 | 0.8 | 0.1 |
| 576 | 110g08 | AV389815 | CM040a04  | Cytochrome c oxidase subunit 6b-1                                  | <i>Oryza sativa</i>                          | 42.8  | 35.8  | 36.0  | 0.8 | 0.0 | 1.0 | 0.1 |
| 577 | 036c06 | BP097973 | MXL084d11 | Cytochrome c reductase-processing peptidase subunit I, MPP subunit | <i>Cucumis melo</i>                          | 88.4  | 54.8  | 71.5  | 0.6 | 0.1 | 0.8 | 0.3 |
| 578 | 011d03 | AV634782 | HC037g12  | Cytochrome C1, heme protein                                        | <i>Chlamydomonas reinhardtii</i>             | 7.0   | 8.2   | 10.9  | 1.2 | 0.1 | 0.7 | 0.1 |
| 579 | 020b10 | AV620824 | LC027b01  | Cytochrome oxidase subunit 2                                       | <i>Ramirella strobiliphora</i>               | 56.8  | 44.0  | 44.9  | 0.8 | 0.2 | 1.1 | 0.4 |
| 580 | 004d11 | AV386752 | CM008f02  | Cytochrome oxidase subunit 3                                       | <i>Nematoloma aurantiaca</i>                 | 16.9  | 16.8  | 18.1  | 1.0 | 0.2 | 0.9 | 0.0 |
| 581 | 035c01 | BP096803 | MXL065b05 | Cytochrome oxidase subunit II                                      | <i>Macrotermes gilvus</i>                    | 81.6  | 64.2  | 48.8  | 0.8 | 0.1 | 1.3 | 0.3 |
| 582 | 001d01 | AV393698 | CL10d07   | Cytochrome b6f 4.6 kDa subunit PetM                                | <i>Chlamydomonas reinhardtii</i>             | 28.1  | 45.7  | 39.5  | 1.7 | 0.2 | 1.2 | 0.4 |
| 583 | 168a05 | BP096279 | MXL055h06 | Cytoplasmic dynein heavy chain                                     | <i>Rattus norvegicus</i>                     | 10.7  | 13.7  | 8.5   | 1.3 | 0.2 | 2.6 | 1.9 |
| 584 | 169d05 | BP096950 | MXL067e08 | Cytoplasmic dynein heavy chain                                     | <i>Rattus norvegicus</i>                     | 58.0  | 53.3  | 24.0  | 1.0 | 0.1 | 2.4 | 1.2 |
| 585 | 163c07 | BP094178 | MXL019b08 | Cytoplasmic dynein heavy chain                                     | <i>Rattus norvegicus</i>                     | 13.3  | 17.9  | 14.1  | 1.4 | 0.6 | 1.4 | 0.6 |
| 586 | 009h11 | AV631952 | HC002b03  | Cytoplasmic malate dehydrogenase                                   | <i>Zea mays</i>                              | 15.4  | 17.5  | 15.7  | 1.2 | 0.5 | 1.1 | 0.2 |
| 587 | 002d01 | AV395132 | CL38g05   | Cytoplasmic ribosomal protein S15a                                 | <i>Arabidopsis thaliana</i>                  | 23.0  | 48.1  | 28.1  | 2.1 | 0.9 | 1.8 | 1.0 |
| 588 | 001f06 | AV394070 | CL18e10   | Cytoplasmic ribosomal protein L18                                  | <i>Arabidopsis thaliana</i>                  | 90.9  | 105.7 | 86.8  | 1.3 | 0.6 | 1.4 | 0.5 |
| 589 | 123b06 | AV639311 | HC097g05  | Cytosol aminopeptidase                                             | <i>Arabidopsis thaliana</i>                  | 17.5  | 17.8  | 18.6  | 1.0 | 0.1 | 1.0 | 0.2 |
| 590 | 118e08 | AV633901 | HC026g01  | Cytosolic chaperonin, delta-subunit                                | <i>Glycine max</i>                           | 28.4  | 33.6  | 26.7  | 1.2 | 0.1 | 1.3 | 0.3 |
| 591 | 021b07 | AV622038 | LC044c04  | Cytosolic phosphoglucose isomerase; PgiC                           | <i>Leaven worthiacrassa</i>                  | 10.5  | 12.6  | 12.4  | 1.3 | 0.8 | 1.1 | 0.8 |
| 592 | 009e09 | AV391996 | CM093f06  | D-3-phosphoglycerate dehydrogenase                                 | <i>Listeria monocytogenes</i>                | 28.1  | 13.4  | 23.3  | 0.5 | 0.2 | 0.6 | 0.2 |
| 593 | 171b06 | BP097756 | MXL080h02 | D-beta-hydroxybutyrate dehydrogenase                               | <i>Caulobacter crescentum</i>                | 24.2  | 47.1  | 20.0  | 2.0 | 0.3 | 2.4 | 0.5 |
| 594 | 009b01 | AV390407 | CM083g04  | DEAD box RNA helicase RH15                                         | <i>Arabidopsis thaliana</i>                  | 45.4  | 47.1  | 51.4  | 1.0 | 0.1 | 1.0 | 0.2 |
| 595 | 119a07 | AV634544 | HC034g07  | DEAD box RNA helicase RH15                                         | <i>Arabidopsis thaliana</i>                  | 54.0  | 44.0  | 53.6  | 0.8 | 0.1 | 0.9 | 0.2 |
| 596 | 101g11 | AV393999 | CL116b09  | DEAD box-like RNA helicase                                         | <i>Arabidopsis thaliana</i>                  | 13.1  | 10.5  | 10.3  | 0.8 | 0.1 | 1.0 | 0.3 |
| 597 | 029f07 | AV630966 | LCL087a03 | DEAD/H (Asp-Glu-Ala-Asp/His) box polypeptide1                      | <i>Gallus gallus</i>                         | 7.9   | 6.5   | 6.8   | 0.8 | 0.1 | 1.0 | 0.4 |
| 598 | 009h08 | AV631898 | HC001d09  | DEAD-box protein abstrakt                                          | <i>Drosophila melanogaster</i>               | 13.0  | 9.4   | 13.4  | 0.8 | 0.2 | 0.7 | 0.2 |
| 599 | 034f05 | BP096049 | MXL051f11 | DegP protease                                                      | <i>Arabidopsis thaliana</i>                  | 10.9  | 10.5  | 17.9  | 1.0 | 0.5 | 0.6 | 0.2 |
| 600 | 165e10 | BP095258 | MXL039a02 | Delta-9 desaturase                                                 | <i>Arabidopsis thaliana</i>                  | 23.9  | 17.8  | 28.1  | 0.7 | 0.1 | 0.6 | 0.0 |
| 601 | 034b05 | BP095299 | MXL039e11 | Delta-9 stearoyl-acyl carrier protein desaturase                   | <i>Thunbergia alata</i>                      | 31.1  | 21.0  | 28.2  | 0.7 | 0.1 | 0.8 | 0.1 |
| 602 | 004f12 | AV387152 | CM012g08  | Delta-aminolevulinic acid dehydratase precursor                    | <i>Chlamydomonas reinhardtii</i>             | 17.3  | 10.7  | 17.9  | 0.7 | 0.5 | 0.7 | 0.5 |
| 603 | 005e03 | AV388103 | CM025a04  | DEM1 protein                                                       | <i>Homo sapiens</i>                          | 12.3  | 15.9  | 12.4  | 1.3 | 0.1 | 1.3 | 0.1 |
| 604 | 107h12 | AV387408 | CM014d03  | Deoxyhypusine synthase                                             | <i>Homo sapiens</i>                          | 8.8   | 6.6   | 5.2   | 0.8 | 0.4 | 1.3 | 0.3 |
| 605 | 124c02 | AV640062 | HCL009f02 | Deoxyribonuclease                                                  | <i>Schizosaccharomyces pombe</i>             | 7.5   | 7.2   | 10.6  | 1.0 | 0.1 | 0.7 | 0.1 |
| 606 | 024b06 | AV626362 | LCL007g12 | Developmental protein DG1148                                       | <i>Dictyostelium discoideum</i>              | 12.4  | 45.0  | 29.7  | 3.6 | 1.0 | 1.5 | 0.1 |
| 607 | 154d08 | AV630961 | LCL086h06 | Developmental protein DG1067                                       | <i>Dictyostelium discoideum</i>              | 6.4   | 6.7   | 7.2   | 1.1 | 0.2 | 0.9 | 0.1 |
| 608 | 034a10 | BP095247 | MXL038g10 | Dhc16F gene product                                                | <i>Drosophila melanogaster</i>               | 7.2   | 6.0   | 5.9   | 0.9 | 0.2 | 1.1 | 0.3 |
| 609 | 166h06 | BP095804 | MXL047f05 | Dhc16F gene product                                                | <i>Drosophila melanogaster</i>               | 28.4  | 22.0  | 51.4  | 0.8 | 0.5 | 0.7 | 0.6 |
| 610 | 172h12 | BP098604 | MXL096b08 | Dhc62B gene product                                                | <i>Drosophila melanogaster</i>               | 12.3  | 10.5  | 15.9  | 0.8 | 0.2 | 0.8 | 0.7 |
| 611 | 013c08 | AV638430 | HC086c07  | Diaminopimelate decarboxylase                                      | <i>Helicobacter pylori J99</i>               | 17.6  | 21.1  | 21.7  | 1.2 | 0.1 | 1.0 | 0.2 |
| 612 | 108h10 | AV387822 | CM022g12  | Diaminopimelate epimerase                                          | <i>Arabidopsis thaliana</i>                  | 9.5   | 7.3   | 7.4   | 0.9 | 0.4 | 1.0 | 0.1 |
| 613 | 163h05 | BP094545 | MXL024g03 | Diaminopimelate epimerase                                          | <i>Arabidopsis thaliana</i>                  | 9.5   | 5.0   | 7.6   | 0.5 | 0.1 | 0.7 | 0.4 |
| 614 | 169c11 |          |           |                                                                    |                                              |       |       |       |     |     |     |     |

|     | A      | B        | C         | D                                                                | E                                 | F      | G     | H        | I    | J   | K   | L   |
|-----|--------|----------|-----------|------------------------------------------------------------------|-----------------------------------|--------|-------|----------|------|-----|-----|-----|
| 640 | 014h05 | AV640497 | HCL017c12 | DNA-directed RNA polymerase subunit 2                            | <i>Plasmodium falciparum</i>      | 6.8    | 7.2   | 6.8      | 1.0  | 0.1 | 1.0 | 0.3 |
| 641 | 030c04 | AV631494 | LCL095a05 | DnaJ                                                             | <i>Listeria monocytogenes</i>     | 8.9    | 9.3   | 11.8     | 1.0  | 0.2 | 0.8 | 0.3 |
| 642 | 148h11 | AV628247 | LCL039b01 | DnaJ protein homolog                                             | <i>Homo sapiens</i>               | 7.4    | 8.1   | 7.3      | 1.1  | 0.1 | 1.1 | 0.2 |
| 643 | 114b09 | AV388960 | CM073h09  | dNAK-type molecular chaperone BiP                                | <i>Oryza sativa</i>               | 26.2   | 16.0  | 23.5     | 0.7  | 0.3 | 0.7 | 0.2 |
| 644 | 005g02 | AV388046 | CM028c12  | Dodecenoyl-Coenzyme A delta isomerase                            | <i>Homo sapiens</i>               | 13.7   | 10.3  | 8.7      | 0.8  | 0.2 | 1.2 | 0.3 |
| 645 | 008c06 | AV393219 | CM068e06  | Dolichyl-diphosphooligosaccharide-protein glycotransferase       | <i>Homo sapiens</i>               | 10.4   | 8.1   | 11.8     | 0.8  | 0.2 | 0.7 | 0.2 |
| 646 | 151h08 | AV629622 | LCL062b11 | DRH1                                                             | <i>Arabidopsis thaliana</i>       | 33.5   | 24.1  | 32.1     | 0.7  | 0.0 | 0.8 | 0.1 |
| 647 | 114f04 | AV390022 | CM081h01  | dTDP-glucose 4-6-dehydratase-like protein                        | <i>Arabidopsis thaliana</i>       | 26.6   | 34.1  | 23.2     | 1.4  | 0.3 | 1.7 | 0.6 |
| 648 | 158h01 | BP087703 | MX041g10  | dTDP-glucose 4-6-dehydratase-like protein                        | <i>Arabidopsis thaliana</i>       | 32.7   | 40.9  | 30.4     | 1.3  | 0.1 | 1.4 | 0.2 |
| 649 | 022a01 | AV623162 | LC059g07  | Dual specificity protein phosphatase                             |                                   | 22.3   | 29.8  | 27.0     | 1.3  | 0.3 | 1.1 | 0.3 |
| 650 | 154g09 | AV631145 | LCL089e04 | Dual-specificity tyrosine-(Y)-phosphorylation regulated kinase 2 | <i>Neurospora crassa</i>          | 3.8    | 3.3   | 3.6      | 0.9  | 0.1 | 1.0 | 0.3 |
| 651 | 021g07 | AV622899 | LC056c08  | dUTP pyrophosphatase-like protein                                | <i>Arabidopsis thaliana</i>       | 20.6   | 16.3  | 18.0     | 0.8  | 0.1 | 0.9 | 0.1 |
| 652 | 003g03 | AV396986 | CL73c07   | Dynamin-like protein                                             | <i>Arabidopsis thaliana</i>       | 15.3   | 21.5  | 22.0     | 1.4  | 0.1 | 1.1 | 0.4 |
| 653 | 152d04 | AV629950 | LCL069g08 | Dynamin-like protein                                             | <i>Arabidopsis thaliana</i>       | 26.8   | 30.6  | 32.5     | 1.1  | 0.0 | 1.0 | 0.4 |
| 654 | 160d06 | BP088596 | MX064e10  | Dynein 8 kD light chain, flagellar outer arm                     | <i>Chlamydomonas reinhardtii</i>  | 71.8   | 112.3 | 68.4     | 1.5  | 0.1 | 1.8 | 0.8 |
| 655 | 167b02 | BP095887 | MXL048g11 | Dynein beta chain, flagellar outer arm                           | <i>Chlamydomonas reinhardtii</i>  | 7.7    | 27.7  | 8.2      | 3.7  | 1.4 | 5.5 | 3.9 |
| 656 | 172f09 | BP098475 | MXL093h05 | Dynein beta chain, flagellar outer arm                           | <i>Chlamydomonas reinhardtii</i>  | 6.4    | 10.1  | 8.0      | 1.5  | 0.5 | 1.3 | 0.7 |
| 657 | 162g05 | BP093910 | MXL015e02 | Dynein beta chain, flagellar outer arm                           | <i>Chlamydomonas reinhardtii</i>  | 16.6   | 16.6  | 14.6     | 1.0  | 0.4 | 1.2 | 0.5 |
| 658 | 172g12 | BP098550 | MXL095c03 | Dynein beta chain, flagellar outer arm                           | <i>Chlamydomonas reinhardtii</i>  | 6.3    | 8.9   | 9.1      | 1.5  | 0.4 | 1.0 | 0.4 |
| 659 | 172h10 | BP098581 | MXL095g12 | Dynein beta chain, flagellar outer arm                           | <i>Chlamydomonas reinhardtii</i>  | 8.5    | 10.3  | 13.6     | 1.1  | 0.2 | 0.8 | 0.6 |
| 660 | 171g01 | BP098048 | MXL085h10 | Dynein beta chain, flagellar outer arm                           | <i>Chlamydomonas reinhardtii</i>  | 15.7   | 10.0  | 15.8     | 0.6  | 0.4 | 0.7 | 0.7 |
| 661 | 133g01 | AV645173 | HCL099c01 | Dynein beta heavy chain                                          | <i>Chlamydomonas reinhardtii</i>  | 8.4    | 18.0  | 8.8      | 2.1  | 0.3 | 2.1 | 0.6 |
| 662 | 015h11 | AV641550 | HCL036a06 | Dynein beta heavy chain                                          | <i>Chlamydomonas reinhardtii</i>  | 2.4    | 4.9   | 3.1      | 2.0  | 0.3 | 1.5 | 0.5 |
| 663 | 015f11 | AV641323 | HCL031f02 | Dynein beta heavy chain                                          | <i>Chlamydomonas reinhardtii</i>  | 3.3    | 6.5   | 4.4      | 1.9  | 0.3 | 1.4 | 0.7 |
| 664 | 158a05 | BP087362 | MX033a09  | Dynein gamma chain, flagellar outer arm                          | <i>Chlamydomonas reinhardtii</i>  | 51.7   | 34.8  | 27.3     | 0.6  | 0.2 | 1.9 | 1.7 |
| 665 | 171d07 | BP097922 | MXL083f01 | Dynein gamma chain, flagellar outer arm                          | <i>Chlamydomonas reinhardtii</i>  | 7.0    | 8.5   | 8.4      | 1.2  | 0.1 | 1.0 | 0.3 |
| 666 | 164f11 | BP094881 | MXL031f01 | Dynein gamma chain, flagellar outer arm                          | <i>Chlamydomonas reinhardtii</i>  | 8.6    | 11.0  | 10.6     | 1.2  | 0.4 | 1.0 | 0.5 |
| 667 | 035b10 | BP096760 | MXL064d11 | Dynein gamma chain, flagellar outer arm                          | <i>Chlamydomonas reinhardtii</i>  | 6.2    | 6.9   | 7.1      | 1.1  | 0.2 | 1.0 | 0.2 |
| 668 | 131f12 | AV644256 | HCL084h01 | Dynein heavy chain alpha                                         | <i>Chlamydomonas reinhardtii</i>  | 22.9   | 21.3  | 31.6     | 0.9  | 0.1 | 0.9 | 0.4 |
| 669 | 166e07 | BP095687 | MXL045g10 | Dynein heavy chain B2HC                                          | <i>Anthracidaris crassispina</i>  | 8.1    | 11.3  | 8.9      | 1.4  | 0.2 | 1.4 | 0.7 |
| 670 | 170c05 | BP097332 | MXL074a04 | Dynein, 78 kD intermediate chain, flagellar outer arm            | <i>Chlamydomonas reinhardtii</i>  | 14.3   | 26.6  | 18.7     | 1.9  | 0.6 | 1.4 | 0.4 |
| 671 | 118h04 | AV634323 | HC031h07  | EAP30 subunit of ELL complex                                     | <i>Homo sapiens</i>               | 13.1   | 8.7   | 12.8     | 0.7  | 0.2 | 0.7 | 0.4 |
| 672 | 021b02 | AV621975 | LC043a09  | Early zygote protein                                             | <i>Chlamydomonas reinhardtii</i>  | 399.9  | 344.2 | 342.8    | 0.9  | 0.1 | 1.0 | 0.1 |
| 673 | 149e06 | BP383841 | LCL043c01 | EF1-1                                                            | <i>Porphyra purpurea</i>          | 42.1   | 66.5  | 54.6     | 1.6  | 0.4 | 1.2 | 0.1 |
| 674 | 022g12 | AV624315 | LC076a05  | EF-hand protein superfamily member                               | <i>Homo sapiens</i>               | 8.0    | 15.3  | 11.7     | 1.9  | 0.2 | 1.3 | 0.1 |
| 675 | 155b05 | AV631303 | LCL091g01 | EFDE3                                                            | <i>Ephydatia fluviatilis</i>      | 4.4    | 5.2   | 2.4      | 1.2  | 0.2 | 3.3 | 2.3 |
| 676 | 021b03 | AV621993 | LC043f07  | eIF-2 beta subunit                                               | <i>Triticum aestivum</i>          | 40.0   | 22.5  | 27.4     | 0.6  | 0.2 | 0.9 | 0.4 |
| 677 | 114b01 | AV389058 | CM073c08  | eIF3-p40 subunit-like                                            | <i>Arabidopsis thaliana</i>       | 19.1   | 14.9  | 16.9     | 0.9  | 0.6 | 0.9 | 0.4 |
| 678 | 108h03 | AV387886 | CM022d01  | Elongation factor TS                                             | <i>Synechocystis sp. PCC 6803</i> | 52.2   | 58.7  | 57.1     | 1.1  | 0.2 | 1.0 | 0.1 |
| 679 | 001a06 | AV397625 | CL02b12   | Elongation factor TS                                             | <i>Synechocystis sp. PCC 6803</i> | 39.7   | 23.4  | 24.5     | 0.6  | 0.2 | 0.9 | 0.5 |
| 680 | 006d12 | AV389996 | CM041b12  | Elongation factor TU                                             | <i>Oryza sativa</i>               | 5.9    | 3.4   | 3.8      | 0.6  | 0.1 | 0.9 | 0.3 |
| 681 | 004b03 | AV386612 | CM003d10  | Elongation factor 1 alpha                                        | <i>Giardia lamblia</i>            | 106.9  | 100.3 | 69.0     | 0.9  | 0.0 | 1.4 | 0.2 |
| 682 | 117h03 | AV633208 | HC018a08  | Elongation factor 1 alpha                                        | <i>Entamoeba histolytica</i>      | 221.5  | 198.4 | 150.2    | 0.9  | 0.1 | 1.3 | 0.1 |
| 683 | 158f10 | BP087684 | MX041d03  | Elongation factor 1 alpha                                        | <i>Ampharetidae sp.</i>           | 265.7  | 265.8 | 223.5    | 1.0  | 0.1 | 1.2 | 0.1 |
| 684 | 001h01 | AV394435 | CL24f03   | Elongation factor 2                                              | <i>Beta vulgaris</i>              | 43.8   | 33.1  | 30.8     | 0.9  | 0.4 | 1.1 | 0.3 |
| 685 | 130a02 | BP383740 | HCL064g04 | Elongation factor 2                                              | <i>Gallus gallus</i>              | 77.4   | 55.7  | 54.2     | 0.7  | 0.2 | 1.0 | 0.3 |
| 686 | 023a09 | AV624609 | LC080b05  | Elongation factor P                                              | <i>Synechococcus PCC7942</i>      | 30.6   | 25.5  | 20.1     | 0.9  | 0.4 | 1.3 | 0.6 |
| 687 | 032g03 | BP093592 | MXL010f04 | Endomembrane protein EMP70 precursor isolog                      | <i>Arabidopsis thaliana</i>       | 19.0   | 17.4  | 21.9     | 0.9  | 0.1 | 0.8 | 0.2 |
| 688 | 005b06 | AV397442 | CM020a04  | Endomembrane protein EMP70 precursor isolog                      | <i>Arabidopsis thaliana</i>       | 13.9   | 10.6  | 14.0     | 0.8  | 0.1 | 0.8 | 0.2 |
| 689 | 035a08 | BP096551 | MXL060f01 | Endopeptidase Clp ATP-binding chain B                            | <i>Nostoc sp. PCC 7120</i>        | 16.2   | 14.4  | 18.4     | 1.0  | 0.5 | 0.8 | 0.4 |
| 690 | 143h04 | AV626023 | LCL001b10 | Endoplasmic reticulum alpha-mannosidase 1                        | <i>Homo sapiens</i>               | 62.9   | 44.6  | 47.1     | 0.7  | 0.1 | 1.0 | 0.1 |
| 691 | 156d06 | BP086090 | MX001g04  | Endoplasmic reticulum insertion protein                          | <i>Arabidopsis thaliana</i>       | 18.2   | 18.3  | 17.5     | 1.0  | 0.2 | 1.1 | 0.3 |
| 692 | 034b07 | BP095330 | MXL040a10 | Endoplasmic reticulum lumen protein                              | <i>Rattus norvegicus</i>          | 17.8   | 17.8  | 14.8     | 1.0  | 0.1 | 1.2 | 0.1 |
| 693 | 030a02 | AV631271 | LCL091c01 | Enolase                                                          | <i>Chlamydomonas reinhardtii</i>  | 84.7   | 55.5  | 42.0     | 0.7  | 0.2 | 1.8 | 1.2 |
| 694 | 002c05 | AV395092 | CL35d08   | Enolase                                                          | <i>Chlamydomonas reinhardtii</i>  | 29.9   | 27.3  | 26.0     | 0.9  | 0.1 | 1.2 | 0.7 |
| 695 | 010e08 | AV632962 | HC014h11  | Enoyl acp reductase                                              | <i>Brassica napus</i>             | 45.3   | 36.1  | 47.0     | 0.8  | 0.0 | 0.8 | 0.2 |
| 696 | 024b01 | AV626345 | LCL007d05 | Envelope protein LIP-36G2, low CO <sub>2</sub> inducible         | <i>Chlamydomonas reinhardtii</i>  | 50.8   | 108.6 | 96.2     | 2.3  | 1.3 | 1.1 | 0.2 |
| 697 | 122g02 | AV638733 | HC090b02  | ER lumen protein retaining receptor                              | <i>Scherffelia dubia</i>          | 11.1   | 10.7  | 12.4     | 1.0  | 0.2 | 0.9 | 0.3 |
| 698 | 122h05 | AV638999 | HC093f03  | EST                                                              | <i>Arabidopsis thaliana</i>       | 13.3   | 10.1  | 9.5      | 0.8  | 0.2 | 1.1 | 0.2 |
| 699 | 024b04 | AV626358 | LCL007g06 | EST Gm-c1043                                                     | <i>Glycine max</i>                | 7.0    | 62.6  | 56.9     | 10.0 | 3.9 | 1.2 | 0.3 |
| 700 | 021d02 | AV622255 | LC047b12  | EST Gm-c1043                                                     | <i>Glycine max</i>                | 5.9    | 66.1  | 57.5     | 11.4 | 1.4 | 1.2 | 0.1 |
| 701 | 143g12 | AV625993 | LC100g11  | Eukaryotic initiation factor 4A-1                                | <i>Arabidopsis thaliana</i>       | 247.8  | 219.0 | 234.8    | 0.9  | 0.1 | 0.9 | 0.1 |
| 702 | 003a04 | AV395877 | CL52h10   | Eukaryotic protein kinase                                        | <i>Arabidopsis thaliana</i>       | 6.3    | 6.1   | 4.7      | 1.0  | 0.2 | 1.3 | 0.6 |
| 703 | 035a03 | BP096506 | MXL059g12 | Eukaryotic release factor 1 homolog                              | <i>Arabidopsis thaliana</i>       | 28.1   | 9.3   | 16.6     | 0.3  | 0.1 | 0.6 | 0.1 |
| 704 | 011g05 | AV635390 | HC045g08  | Eukaryotic translation initiation factor 1A                      | <i>Onobrychis vicifolia</i>       | 58.6   | 88.5  | 62.1     | 1.6  | 0.3 | 1.4 | 0.2 |
| 705 | 114h11 | AV390226 | CM082d06  | Eukaryotic translation initiation factor 2 beta subunit          | <i>Triticum aestivum</i>          | 507.2  | 217.9 | 418.2    | 0.4  | 0.1 | 0.5 | 0.1 |
| 706 | 013g04 | AV639327 | HC097h11  | Eukaryotic translation initiation factor 3 subunit               | <i>Homo sapiens</i>               | 24.5   | 15.9  | 15.4     | 0.7  | 0.3 | 1.0 | 0.3 |
| 707 | 119h02 | AV635507 | HC047c02  | Eukaryotic translation initiation factor 3 subunit 2             | <i>Arabidopsis thaliana</i>       | 781.0  | 780.7 | 509.5    | 1.0  | 0.1 | 1.7 | 0.6 |
| 708 | 163g01 | BP094450 | MXL023c01 | Eukaryotic translation initiation factor 3 subunit 9             | <i>Oryza sativa</i>               | 10.6   | 4.1   | 6.5      | 0.4  | 0.1 | 0.6 | 0.1 |
| 709 | 155b04 | AV631298 | LCL091f05 | Eukaryotic translation initiation factor 3, subunit 7            | <i>Homo sapiens</i>               | 23.4   | 11.4  | 6.9      | 0.5  | 0.4 | 1.8 | 1.2 |
| 710 | 156g02 | BP086303 | MX006c04  | Eukaryotic translation initiation factor 3, subunit 3            | <i>Arabidopsis thaliana</i>       | 20.6   | 9.6   | 14.9     | 0.5  | 0.1 | 0.7 | 0.2 |
| 711 | 014a11 | AV639724 | HCL003g10 | Eukaryotic translation initiation factor 4                       | <i>Triticum aestivum</i>          | 38.0   | 13.2  | 20.5     | 0.4  | 0.1 | 0.7 | 0.2 |
| 712 | 021a11 | AV621942 | LC042h08  | Exol protein                                                     | <i>Rhizobium meliloti</i>         | 69.8   | 67.3  | 52.3     | 0.9  | 0.1 | 1.3 | 0.4 |
| 713 | 155f06 | AV631524 | LCL095f04 | Exopolysphatase                                                  | <i>Pseudomonas aeruginosa</i>     | 11.0   | 11.8  | 18.1     | 1.1  | 0.3 | 0.7 | 0.2 |
| 714 | 025f08 | AV627680 | LCL030d12 | Exportin1 protein                                                | <i>Arabidopsis thaliana</i>       | 21.6   | 16.5  | 19.6     | 0.9  | 0.3 | 0.9 | 0.1 |
| 715 | 026c10 | AV628261 | LCL039c06 | Exportin1 protein                                                | <i>Arabidopsis thaliana</i>       | 37.0   | 22.1  | 27.0     | 0.6  | 0.1 | 0.8 | 0.1 |
| 716 | 033c04 | BP094218 | MXL019f10 | Exportin1 protein                                                | <i>Arabidopsis thaliana</i>       | 7.6    | 5.5   | 7.3      | 0.7  | 0.1 | 0.7 | 0.1 |
| 717 | 004b10 | AV397861 | CM002g05  | Expressed protein                                                | <i>Arabidopsis thaliana</i>       | 25.6   | 34.8  | 10.8     | 1.8  | 0.9 | 3.3 | 0.3 |
| 718 | 159b04 | BP087740 | MX042i08  | Expressed protein                                                | <i>Arabidopsis thaliana</i>       | 36.5   | 32.1  | 14.6     | 0.8  | 0.3 | 2.8 | 2.2 |
| 719 | 022g03 | AV624180 | LC074a09  | Expressed protein                                                | <i>Arabidopsis thaliana</i>       | 17.3   | 17.8  | 16.8     | 1.0  | 0.3 | 1.1 | 0.2 |
| 720 | 122d02 | AV638167 | HC082g06  | Expressed protein                                                | <i>Arabidopsis thaliana</i>       | 17.0   | 25.1  | 27.8     | 1.5  | 0.4 | 1.0 | 0.5 |
| 721 | 140h08 | AU301244 | LC073e06  | Expressed protein                                                | <i>Arabidopsis thaliana</i>       | 1636.5 | 653.1 | 1160.2</ |      |     |     |     |

|     | A        | B        | C         | D                                                         | E                                    | F     | G     | H     | I   | J   | K   | L   |
|-----|----------|----------|-----------|-----------------------------------------------------------|--------------------------------------|-------|-------|-------|-----|-----|-----|-----|
| 747 | 155e06   | AV631457 | LCL094c11 | Ferredoxin-dependent glutamate synthase                   | <i>Spinacia oleracea</i>             | 69.9  | 66.0  | 97.6  | 0.9 | 0.3 | 0.7 | 0.2 |
| 748 | 121d01   | AV637084 | HC068e02  | Ferredoxin--NADP reductase, chloroplast                   | <i>Chlamydomonas reinhardtii</i>     | 88.8  | 71.6  | 73.4  | 0.9 | 0.3 | 1.1 | 0.4 |
| 749 | 015e01   | AV641108 | HCL027h06 | Ferredoxin-NADP+ reductase                                | <i>Chlamydomonas reinhardtii</i>     | 98.3  | 101.0 | 85.6  | 1.2 | 0.5 | 1.2 | 0.3 |
| 750 | 021e09   | AV622547 | LC051a12  | Ferredoxin-NADP+ reductase                                | <i>Chlamydomonas reinhardtii</i>     | 129.5 | 85.9  | 99.7  | 0.7 | 0.1 | 0.9 | 0.3 |
| 751 | 035b12   | BP096797 | MXL065a08 | Ferredoxin-sulfite reductase                              | <i>Synechocystis sp. PCC 6803</i>    | 34.0  | 24.2  | 28.6  | 0.8 | 0.4 | 0.9 | 0.4 |
| 752 | 010a08   | AV632120 | HC004b11  | Ferredoxin-thioredoxin reductase, catalytic chain         | <i>Glycine max</i>                   | 20.8  | 26.0  | 27.3  | 1.2 | 0.1 | 1.0 | 0.2 |
| 753 | 170a05   | BP097207 | MXL071g09 | Ferredoxin-thioredoxin reductase, subunit A               | <i>Solanum tuberosum</i>             | 54.9  | 65.6  | 33.0  | 1.1 | 0.2 | 2.6 | 2.2 |
| 754 | 158f09   | BP087682 | MX041c09  | Ferritin 1 precursor - maize                              | <i>Zea mays</i>                      | 15.3  | 15.9  | 19.5  | 1.0 | 0.2 | 0.8 | 0.2 |
| 755 | 167a09   | BP095873 | MXL048f02 | Ferritin light chain                                      | <i>Glycine max</i>                   | 4.7   | 5.3   | 2.6   | 1.2 | 0.5 | 3.8 | 3.2 |
| 756 | 002d04   | AV395232 | CL37d10   | Ferritin subunit cowpea2 precursor                        | <i>Vigna unguiculata</i>             | 9.1   | 12.3  | 12.8  | 1.3 | 0.2 | 0.9 | 0.2 |
| 757 | 160c09   | BP088527 | MX062f05  | Fibrillarlin                                              | <i>Drosophila melanogaster</i>       | 84.5  | 67.8  | 38.3  | 0.8 | 0.5 | 2.1 | 1.6 |
| 758 | 022b06   | AV623481 | LC064d07  | Fimbriata-associated protein                              | <i>Antirrhinum majus</i>             | 63.1  | 44.3  | 44.6  | 0.7 | 0.1 | 1.0 | 0.2 |
| 759 | 134h03   | AV619575 | LC010g05  | Fis1                                                      | <i>Linum usitatissimum</i>           | 11.0  | 12.3  | 14.1  | 1.2 | 0.4 | 1.0 | 0.5 |
| 760 | 164e04   | BP094766 | MXL029a10 | Fis1                                                      | <i>Linum usitatissimum</i>           | 6.7   | 5.7   | 11.2  | 0.9 | 0.2 | 0.6 | 0.4 |
| 761 | 018f03   | AV619012 | LC002f01  | FKBP type peptidyl-prolyl cis-trans isomerase isolog      | <i>Arabidopsis thaliana</i>          | 10.4  | 11.3  | 9.7   | 1.1 | 0.3 | 1.2 | 0.2 |
| 762 | 015a02   | AV640595 | HCL018h04 | Fks1p                                                     | <i>Neurospora crassa</i>             | 3.8   | 6.3   | 6.1   | 1.7 | 0.3 | 1.1 | 0.1 |
| 763 | 121a11   | AV636786 | HC084d06  | Flagellar protofilament ribbon protein                    | <i>Chlamydomonas reinhardtii</i>     | 11.7  | 19.2  | 10.7  | 1.7 | 0.2 | 1.8 | 0.6 |
| 764 | 114e05   | AV388008 | CM077f11  | Flagellar radial spoke protein                            | <i>Chlamydomonas reinhardtii</i>     | 10.9  | 8.7   | 6.9   | 0.8 | 0.2 | 1.3 | 0.2 |
| 765 | 035d04   | BP096963 | MXL067h01 | Flagellar radial spoke protein                            | <i>Chlamydomonas reinhardtii</i>     | 9.6   | 8.5   | 8.4   | 0.9 | 0.2 | 1.0 | 0.2 |
| 766 | 159g12   | BP088130 | MX052d11  | Flagellar radial spoke protein 4                          | <i>Chlamydomonas reinhardtii</i>     | 25.2  | 20.7  | 28.6  | 0.8 | 0.0 | 0.8 | 0.3 |
| 767 | 024g06   | AV626816 | LCL015h08 | Flavoprotein                                              | <i>Nostoc sp. PCC 7120</i>           | 12.2  | 41.2  | 19.2  | 3.3 | 1.2 | 2.1 | 0.7 |
| 768 | 115c05   | AV390159 | CM085h09  | Formate acetyl transferase                                | <i>Chlamydomonas reinhardtii</i>     | 33.5  | 36.7  | 16.3  | 1.2 | 0.3 | 2.3 | 0.3 |
| 769 | 120c12   | AV635948 | HC053b08  | Formate acetyl transferase                                | <i>Clostridium perfringens</i>       | 207.0 | 248.6 | 185.4 | 1.2 | 0.2 | 1.3 | 0.1 |
| 770 | 028e05   | AV630068 | LCL072d10 | Formate dehydrogenase                                     | <i>Methanobacterium formicicum</i>   | 12.1  | 12.6  | 9.1   | 1.1 | 0.3 | 1.4 | 0.1 |
| 771 | 111e05   | AV390803 | CM048d05  | Formyltetrahydrofolate deformylase                        | <i>Synechocystis sp. PCC 6803</i>    | 6.8   | 5.8   | 4.2   | 0.9 | 0.1 | 1.4 | 0.2 |
| 772 | 157f08   | BP087112 | MX025f07  | Formyltetrahydrofolate deformylase                        | <i>Synechocystis sp. PCC 6803</i>    | 9.7   | 6.7   | 5.0   | 0.7 | 0.0 | 1.3 | 0.2 |
| 773 | 060f04   | AV390205 | CM044b01  | Fructose-1,6-bisphosphatase, chloroplast                  | <i>Solanum tuberosum</i>             | 66.3  | 41.0  | 54.3  | 0.7 | 0.3 | 0.8 | 0.2 |
| 774 | 116f01   | AV393139 | CM100d12  | Fructose-1,6-bisphosphatase aldolase                      | <i>Chlamydomonas reinhardtii</i>     | 138.1 | 135.2 | 152.8 | 1.0 | 0.1 | 1.0 | 0.4 |
| 775 | 146a12   | AV626987 | LCL019d04 | Fructose-2,6-bisphosphatase                               | <i>Saccharomyces cerevisiae</i>      | 15.5  | 11.1  | 10.4  | 0.7 | 0.1 | 1.1 | 0.3 |
| 776 | 132e03   | AV391233 | HCL092f03 | Fructose-bisphosphatase aldolase                          | <i>Chlamydomonas reinhardtii</i>     | 330.6 | 220.9 | 160.6 | 0.7 | 0.2 | 1.5 | 0.8 |
| 777 | 112e08   | AV391966 | CM057g10  | Fructose-bisphosphatase aldolase                          | <i>Chlamydomonas reinhardtii</i>     | 295.9 | 185.5 | 204.3 | 0.6 | 0.0 | 0.9 | 0.1 |
| 778 | 004b01   | AV397863 | CM020h05  | Fructosediphosphate aldolase                              | <i>Chlamydomonas reinhardtii</i>     | 132.7 | 140.5 | 100.8 | 1.0 | 0.2 | 1.4 | 0.6 |
| 779 | 123b03   | AV639291 | HC097e02  | FtsH protease, putative                                   | <i>Arabidopsis thaliana</i>          | 27.1  | 35.7  | 42.9  | 1.3 | 0.2 | 0.9 | 0.2 |
| 780 | 172a07   | BP098178 | MXL088g08 | FtsH-like protein Pftf precursor                          | <i>Nicotiana tabacum</i>             | 23.0  | 37.9  | 31.6  | 1.7 | 0.1 | 1.8 | 1.4 |
| 781 | 030a04   | AV631275 | LCL091c05 | FtsH-like protein Pftf precursor                          | <i>Nicotiana tabacum</i>             | 30.1  | 49.5  | 45.7  | 1.6 | 0.3 | 1.2 | 0.4 |
| 782 | 026f05   | AV628461 | LCL042c04 | FtsH-like protein Pftf precursor                          | <i>Nicotiana tabacum</i>             | 29.1  | 31.6  | 46.6  | 1.1 | 0.1 | 0.7 | 0.3 |
| 783 | 128a02   | AV642106 | HCL045g03 | FtsJ                                                      | <i>Arabidopsis thaliana</i>          | 6.7   | 5.4   | 5.5   | 0.8 | 0.2 | 1.0 | 0.2 |
| 784 | 160a12   | BP088348 | MX058d10  | Fumarate hydratase class I                                | <i>Streptomyces coelicolor</i>       | 11.7  | 10.3  | 7.1   | 0.9 | 0.2 | 1.7 | 0.8 |
| 785 | 135f08   | AV620116 | LC017g09  | G beta repeats of the beta-transducin family-like protein | <i>Caenorhabditis elegans</i>        | 8.2   | 5.0   | 7.9   | 0.6 | 0.1 | 0.6 | 0.1 |
| 786 | 120b05   | AV635768 | HC050f08  | G beta-like protein                                       | <i>Mus musculus</i>                  | 7.2   | 7.0   | 6.4   | 1.0 | 0.2 | 1.1 | 0.2 |
| 787 | 036h07   | BP098860 | MXL100d01 | G subunit of Vacuolar-type H+-ATPase                      | <i>Nicotiana tabacum</i>             | 72.9  | 65.2  | 38.8  | 0.9 | 0.4 | 1.7 | 0.7 |
| 788 | 165h02   | BP095357 | MXL040e06 | G subunit of Vacuolar-type H+-ATPase                      | <i>Nicotiana tabacum</i>             | 46.6  | 35.3  | 30.5  | 0.8 | 0.2 | 1.2 | 0.2 |
| 789 | 012h06   | AV637597 | HC075b12  | G2p                                                       | <i>Arabidopsis thaliana</i>          | 58.7  | 33.7  | 30.3  | 0.6 | 0.2 | 1.1 | 0.5 |
| 790 | 161d04   | BP093103 | MXL003d07 | Gamete lytic enzyme                                       | <i>Chlamydomonas reinhardtii</i>     | 26.1  | 23.9  | 20.7  | 0.9 | 0.1 | 1.2 | 0.5 |
| 791 | 031f02   | BP087146 | MX026f11  | Gamete lytic enzyme                                       | <i>Chlamydomonas reinhardtii</i>     | 12.4  | 10.9  | 6.1   | 0.9 | 0.1 | 1.9 | 0.4 |
| 792 | 010b04   | AV393555 | CL05b02   | Gamma heavy chain subunit of outer-arm dynein             | <i>Chlamydomonas reinhardtii</i>     | 9.6   | 9.4   | 10.8  | 1.0 | 0.1 | 0.9 | 0.1 |
| 793 | 139d01   | AV623016 | LC057g12  | Gamma hydroxybutyrate dehydrogenase                       | <i>Arabidopsis thaliana</i>          | 23.9  | 36.1  | 15.9  | 2.1 | 1.4 | 2.3 | 0.4 |
| 794 | 168f12   | BP096659 | MXL062e11 | Gamma-adaptin 2                                           | <i>Arabidopsis thaliana</i>          | 18.7  | 15.5  | 17.8  | 0.9 | 0.2 | 0.9 | 0.2 |
| 795 | 122d07   | AV638246 | HC083g08  | Gamma-glutamyl hydrolase                                  | <i>Rattus norvegicus</i>             | 21.2  | 30.5  | 23.9  | 1.4 | 0.3 | 1.3 | 0.7 |
| 796 | 137d06   | AV621527 | LC037c08  | Gamma-glutamylcysteine synthetase                         | <i>Brassica juncea</i>               | 14.2  | 13.6  | 12.3  | 1.0 | 0.1 | 1.1 | 0.1 |
| 797 | 027a07   | AV628768 | LCL046g07 | Gamma-glutamylcysteine synthetase                         | <i>Medicago truncatula</i>           | 18.9  | 17.2  | 18.1  | 0.9 | 0.1 | 1.0 | 0.1 |
| 798 | 110g03   | AV389738 | CM039e08  | Gamma-tocopherol methyltransferase                        | <i>Arabidopsis thaliana</i>          | 4.0   | 5.0   | 4.6   | 1.3 | 0.5 | 1.1 | 0.5 |
| 799 | 139h04   | AV623435 | LC063g02  | Gamma-tubulin                                             | <i>Chlamydomonas reinhardtii</i>     | 21.4  | 21.1  | 19.5  | 1.0 | 0.2 | 1.1 | 0.2 |
| 800 | 009d10   | AV391550 | CM091f09  | Gbp1p                                                     | <i>Chlamydomonas reinhardtii</i>     | 176.9 | 162.3 | 225.4 | 0.9 | 0.1 | 0.7 | 0.1 |
| 801 | 165d01   | AV619315 | LC006e08  | Gbp1p protein                                             | <i>Chlamydomonas reinhardtii</i>     | 34.2  | 15.9  | 25.2  | 0.4 | 0.2 | 0.6 | 0.3 |
| 802 | 009c04   | AV390989 | CM087a04  | Gbp1p protein                                             | <i>Chlamydomonas reinhardtii</i>     | 27.4  | 11.7  | 19.8  | 0.5 | 0.3 | 0.6 | 0.3 |
| 803 | 140f06   | AV623971 | LC071b12  | Gbp1p protein                                             | <i>Chlamydomonas reinhardtii</i>     | 42.5  | 14.6  | 31.1  | 0.3 | 0.2 | 0.5 | 0.4 |
| 804 | 167g10   | AV619315 | LC006e08  | Gbp1p protein                                             | <i>Chlamydomonas reinhardtii</i>     | 23.1  | 13.4  | 38.1  | 0.6 | 0.1 | 0.4 | 0.2 |
| 805 | 172b06   | BP098240 | MXL090a01 | gcpE protein                                              | <i>Chlamydia muridarum</i>           | 30.1  | 29.8  | 14.6  | 1.0 | 0.4 | 2.1 | 0.7 |
| 806 | 014b05   | AV639761 | HCL004e11 | GCP E Protein                                             | <i>Chlamydia pneumoniae</i>          | 46.6  | 28.5  | 24.9  | 0.7 | 0.2 | 1.2 | 0.3 |
| 807 | 007d10   | AV391666 | CM055f08  | GDP dissociation inhibitor protein GDV1p                  | <i>Volvox carterii, nagariensis</i>  | 7.5   | 12.5  | 12.4  | 1.7 | 0.7 | 1.0 | 0.4 |
| 808 | 153e10   | AV630542 | LCL080e03 | GDP-mannose pyrophosphorylase                             | <i>Solanum tuberosum</i>             | 17.2  | 12.4  | 14.0  | 0.8 | 0.4 | 0.9 | 0.4 |
| 809 | 171h11   | BP098164 | MXL088e09 | Gene mastermind protein                                   | <i>Drosophila virilis</i>            | 15.7  | 15.0  | 20.7  | 0.9 | 0.3 | 0.9 | 0.8 |
| 810 | 031e05   | BP086951 | MX021b11  | Gene product with similarity to dynein beta subunit       | <i>Homo sapiens</i>                  | 8.3   | 8.6   | 8.1   | 1.1 | 0.2 | 1.1 | 0.1 |
| 811 | 164e07   | BP094773 | MXL029c08 | GeranylGeranyl hydrogenase                                | <i>Glycine max</i>                   | 109.2 | 49.7  | 111.6 | 0.5 | 0.3 | 0.5 | 0.3 |
| 812 | 022c06   | AV623576 | LC065g12  | GeranylGeranyl hydrogenase                                | <i>Glycine max</i>                   | 165.0 | 49.7  | 125.1 | 0.3 | 0.1 | 0.4 | 0.3 |
| 813 | 007c06   | AV391384 | CM053f08  | GeranylGeranyl hydrogenase                                | <i>Mesembryanthemum crystallinum</i> | 69.5  | 26.5  | 67.0  | 0.4 | 0.2 | 0.4 | 0.3 |
| 814 | 158h02   | BP087704 | MX041g11  | GeranylGeranyl hydrogenase                                | <i>Glycine max</i>                   | 93.1  | 20.3  | 81.8  | 0.2 | 0.0 | 0.2 | 0.0 |
| 815 | 102e11   | AV394437 | CL24g07   | GH07290                                                   | <i>Drosophila melanogaster</i>       | 11.6  | 10.0  | 19.4  | 0.9 | 0.1 | 0.6 | 0.3 |
| 816 | 138c01   | AV622151 | LC045g12  | Glossy15                                                  | <i>Zea mays</i>                      | 35.1  | 32.1  | 42.1  | 0.9 | 0.3 | 0.8 | 0.2 |
| 817 | 133h10   | AV645218 | HCL099g07 | Glucose-1-phosphate adenylyltransferase                   | <i>Solanum tuberosum</i>             | 41.6  | 26.8  | 35.5  | 0.6 | 0.1 | 0.7 | 0.2 |
| 818 | 160b11   | BP089430 | MX207b07  | Glucose-6-phosphate 1-dehydrogenase 2                     | <i>Petroselinum crispum</i>          | 9.8   | 7.7   | 16.3  | 0.7 | 0.4 | 0.7 | 0.6 |
| 819 | 013g10   | AV639568 | HCL001b04 | Glucose-6-phosphate isomerase, cytosolic A                | <i>Spinacia oleracea</i>             | 23.2  | 19.2  | 17.1  | 0.8 | 0.2 | 1.2 | 0.4 |
| 820 | 032a04   | BP087667 | MX041a01  | Glutamine synthetase, chloroplast GS2                     | <i>Chlamydomonas reinhardtii</i>     | 227.3 | 197.7 | 174.4 | 0.9 | 0.2 | 1.3 | 0.6 |
| 821 | 029d07   | AV630827 | LCL084h02 | Glutamine synthetase, cytosolic isozyme GS1               | <i>Chlamydomonas reinhardtii</i>     | 19.1  | 20.7  | 17.4  | 1.1 | 0.2 | 1.3 | 0.3 |
| 822 | 034f06   | BP096082 | MXL052c11 | Glutamine synthetase, cytosolic isozyme GS1               | <i>Chlamydomonas reinhardtii</i>     | 71.3  | 60.7  | 94.2  | 0.9 | 0.2 | 0.7 | 0.2 |
| 823 | 042h06   | AV626891 | LCL017e07 | Glutamate 5-kinase                                        | <i>Synechocystis sp. PCC 6803</i>    | 1.3   | 1.4   | 1.2   | 1.1 | 0.1 | 1.4 | 0.5 |
| 824 | 114h12   | AV390213 | CM082e06  | Glutamate dehydrogenase                                   | <i>Asparagus officinalis</i>         | 5.3   | 6.0   | 6.0   | 1.1 | 0.3 | 1.0 | 0.3 |
| 825 | 131e02   | AV644151 | HCL082h12 | Glutamate synthase (ferredoxin)                           | <i>Vitis vinifera</i>                | 25.4  | 35.6  | 33.2  | 1.4 | 0.1 | 1.1 | 0.1 |
| 826 | 131h06   | AV644355 | HCL086h09 | Glutamate synthase (NADH)                                 | <i>Arabidopsis thaliana</i>          | 13.0  | 11.3  | 9.0   | 0.9 | 0.2 | 1.3 | 0.3 |
| 827 | 033b11   | BP094164 | MXL019a01 | Glutamate-1-semialdehyde aminotransferase                 | <i>Chlamydomonas reinhardtii</i>     | 96.2  | 14.3  | 39.8  | 0.1 | 0.1 | 0.4 | 0.3 |
| 828 | 164a02</ |          |           |                                                           |                                      |       |       |       |     |     |     |     |



|     | A      | B        | C         | D                                                              | E                                | F     | G     | H     | I   | J   | K   | L   |
|-----|--------|----------|-----------|----------------------------------------------------------------|----------------------------------|-------|-------|-------|-----|-----|-----|-----|
| 854 | 161e01 | BP093173 | MXL004e10 | Glycerol-3-phosphate acyltransferase                           | <i>Cucurbita moschata</i>        | 24.7  | 25.2  | 23.2  | 1.0 | 0.3 | 1.1 | 0.3 |
| 855 | 016h04 | AV642675 | HCL055h03 | Glycerol-3-phosphate dehydrogenase (NAD+)                      | <i>Cuphea lanceolata</i>         | 6.0   | 8.8   | 4.6   | 1.6 | 0.6 | 1.9 | 0.3 |
| 856 | 024d01 | AV626506 | LCL010c06 | Glycerol-3-phosphate dehydrogenase (NAD+)                      | <i>Cuphea lanceolata</i>         | 8.2   | 8.2   | 10.1  | 1.1 | 0.5 | 1.0 | 0.6 |
| 857 | 170f06 | BP097509 | MXL077a09 | Glycerol-3-phosphate dehydrogenase (NAD+)                      | <i>Cuphea lanceolata</i>         | 13.8  | 7.6   | 17.2  | 0.6 | 0.4 | 0.6 | 0.5 |
| 858 | 159d06 | BP087781 | MX043e01  | Glycine decarboxylase complex H-protein                        | <i>Arabidopsis thaliana</i>      | 56.1  | 108.7 | 82.6  | 1.9 | 0.1 | 1.4 | 0.5 |
| 859 | 003b05 | AV396054 | CL55d06   | Glycine decarboxylase complex P-protein                        | <i>Arabidopsis thaliana</i>      | 18.9  | 52.2  | 37.4  | 2.8 | 0.6 | 1.4 | 0.0 |
| 860 | 025e05 | AV627472 | LCL027c05 | Glycine decarboxylase complex P-protein                        | <i>Arabidopsis thaliana</i>      | 16.2  | 35.6  | 31.2  | 2.3 | 0.4 | 1.2 | 0.2 |
| 861 | 191e10 | AV619907 | LCO13c08  | Glycine decarboxylase complex P-protein                        | <i>Arabidopsis thaliana</i>      | 38.6  | 28.4  | 28.9  | 0.8 | 0.3 | 1.0 | 0.3 |
| 862 | 036g12 | BP098745 | MXL098d06 | Glycine hydroxymethyltransferase                               | <i>Arabidopsis thaliana</i>      | 98.1  | 62.7  | 60.1  | 0.7 | 0.1 | 1.1 | 0.2 |
| 863 | 04a009 | AV387487 | CM016a10  | Glycine hydroxymethyltransferase-like protein                  | <i>Arabidopsis thaliana</i>      | 20.8  | 19.8  | 13.6  | 1.0 | 0.1 | 1.5 | 1.1 |
| 864 | 023c12 | AV624955 | LCO85a05  | Glycine rich protein                                           | <i>Nicotiana tabacum</i>         | 10.5  | 8.7   | 8.5   | 0.8 | 0.2 | 1.1 | 0.2 |
| 865 | 149d05 | AV628473 | LCL042d09 | Glycine-rich protein                                           | <i>Arabidopsis thaliana</i>      | 19.0  | 21.1  | 30.7  | 1.3 | 0.5 | 0.8 | 0.3 |
| 866 | 025e11 | AV627539 | LCL028b12 | Glycogen debranching enzyme                                    | <i>Escherichia coli</i>          | 14.1  | 13.9  | 11.7  | 1.0 | 0.1 | 1.2 | 0.2 |
| 867 | 016d02 | AV642048 | HCL044e06 | Glycogen phosphorylase 1                                       | <i>Dictyostelium discoideum</i>  | 18.4  | 27.3  | 23.3  | 1.7 | 0.8 | 1.2 | 0.3 |
| 868 | 016g07 | AV642537 | HCL053e10 | Glycogen phosphorylase 1                                       | <i>Dictyostelium discoideum</i>  | 8.8   | 6.8   | 6.5   | 0.8 | 0.2 | 1.1 | 0.5 |
| 869 | 01c01  | AV393452 | CL07c08   | Glycogen synthase kinase-3 homolog MSK-1                       | <i>Arabidopsis thaliana</i>      | 17.4  | 26.3  | 22.5  | 1.5 | 0.3 | 1.2 | 0.2 |
| 870 | 024i11 | AV626334 | LCL007b08 | Glycolate dehydrogenase                                        | <i>Chlamydomonas reinhardtii</i> | 12.8  | 51.4  | 35.0  | 4.0 | 0.4 | 1.5 | 0.1 |
| 871 | 027h08 | AV629489 | LCL059f11 | Glycolate dehydrogenase                                        | <i>Chlamydomonas reinhardtii</i> | 10.9  | 48.9  | 39.5  | 4.5 | 0.8 | 1.2 | 0.1 |
| 872 | 024d10 | AV626558 | LCL011c05 | Glycolate dehydrogenase                                        | <i>Chlamydomonas reinhardtii</i> | 11.2  | 48.9  | 44.9  | 4.5 | 0.6 | 1.1 | 0.1 |
| 873 | 127c08 | AV641728 | HCL039d08 | Glycosyl hydrolases                                            | <i>Arabidopsis thaliana</i>      | 10.6  | 7.5   | 12.4  | 0.7 | 0.1 | 0.6 | 0.2 |
| 874 | 135g01 | AV620182 | LCO18f10  | Glycyl-tRNA synthetase                                         | <i>Arabidopsis thaliana</i>      | 32.5  | 23.1  | 20.4  | 0.7 | 0.1 | 1.1 | 0.2 |
| 875 | 123g11 | AV639802 | HCL005c03 | Glycyl-tRNA synthetase                                         | <i>Arabidopsis thaliana</i>      | 23.1  | 14.0  | 15.6  | 0.6 | 0.1 | 0.9 | 0.2 |
| 876 | 017f07 | AV643537 | HCL071c12 | Glycyl-tRNA synthetase                                         | <i>Arabidopsis thaliana</i>      | 20.4  | 11.4  | 15.8  | 0.6 | 0.3 | 0.7 | 0.2 |
| 877 | 122f04 | AV638619 | HC088f04  | Glyoxyl oxidase (glx1), putative                               | <i>Arabidopsis thaliana</i>      | 24.4  | 14.3  | 10.8  | 0.6 | 0.3 | 1.5 | 1.0 |
| 878 | 003g05 | AV396966 | CL73g11   | Glyoxylase I activity-enhancing protein GAC                    | <i>Saccharomyces cerevisiae</i>  | 3.3   | 3.1   | 2.7   | 1.1 | 0.5 | 1.2 | 0.2 |
| 879 | 035e09 | BP097115 | MXL070d05 | GMP synthase                                                   | <i>Arabidopsis thaliana</i>      | 26.1  | 15.8  | 20.0  | 0.6 | 0.1 | 0.8 | 0.3 |
| 880 | 023e11 | AV625224 | LCO89e06  | GPI transamidase                                               | <i>Homo sapiens</i>              | 8.8   | 6.9   | 7.8   | 0.8 | 0.2 | 0.9 | 0.1 |
| 881 | 029p12 | AV631115 | LCL089a12 | Granule-bound starch synthase I, Sta2                          | <i>Chlamydomonas reinhardtii</i> | 26.6  | 82.6  | 72.8  | 3.2 | 1.3 | 1.1 | 0.3 |
| 882 | 006b12 | AV389417 | CM0036e06 | Granule-bound starch synthase I, Sta2                          | <i>Chlamydomonas reinhardtii</i> | 36.9  | 34.6  | 38.9  | 1.0 | 0.2 | 1.0 | 0.4 |
| 883 | 153e04 | AV630508 | LCL079h11 | Growth regulator like protein                                  | <i>Arabidopsis thaliana</i>      | 25.6  | 19.6  | 22.4  | 0.8 | 0.2 | 0.9 | 0.2 |
| 884 | 018d11 | AV644533 | HCL090b08 | GTP-binding protein                                            | <i>Arabidopsis thaliana</i>      | 6.3   | 9.3   | 11.0  | 1.4 | 0.3 | 0.9 | 0.6 |
| 885 | 017f04 | AV643448 | HCL069h02 | GTP-binding protein tyra/bipa homolog                          | <i>Arabidopsis thaliana</i>      | 8.1   | 6.4   | 6.6   | 0.9 | 0.4 | 1.0 | 0.4 |
| 886 | 02a01  | AV620655 | LCO25a11  | GTP-binding protein                                            | <i>Volvox carterii</i>           | 7.9   | 6.6   | 5.9   | 0.9 | 0.2 | 1.2 | 0.3 |
| 887 | 034g02 | BP096178 | MXL054b03 | Guanine aminohydrolase                                         | <i>Rattus norvegicus</i>         | 459.7 | 411.9 | 259.7 | 0.9 | 0.0 | 1.8 | 0.9 |
| 888 | 159c09 | BP087767 | MX043c02  | Guanine nucleotide-binding protein beta subunit-like protein   | <i>Chlamydomonas reinhardtii</i> | 111.1 | 164.6 | 110.1 | 1.5 | 0.1 | 1.7 | 0.7 |
| 889 | 141f04 | BP383818 | LCO82g01  | Guanine nucleotide-binding protein beta subunit-like protein   | <i>Chlamydomonas reinhardtii</i> | 167.0 | 177.9 | 138.0 | 1.1 | 0.2 | 1.4 | 0.3 |
| 890 | 004g03 | AV387031 | CM013c01  | Guanine nucleotide-binding protein beta subunit-like protein   | <i>Chlamydomonas reinhardtii</i> | 71.4  | 98.5  | 78.1  | 1.5 | 0.4 | 1.3 | 0.1 |
| 891 | 115b12 | AV390616 | CM085d07  | Guanine nucleotide-binding protein beta subunit-like protein   | <i>Chlamydomonas reinhardtii</i> | 54.9  | 76.3  | 64.4  | 1.4 | 0.1 | 1.2 | 0.3 |
| 892 | 115f07 | AV391310 | CM089h10  | Guanine nucleotide-binding protein beta subunit-like protein   | <i>Chlamydomonas reinhardtii</i> | 57.3  | 71.2  | 60.5  | 1.2 | 0.1 | 1.2 | 0.3 |
| 893 | 120h09 | AV636531 | HC060f12  | Guanine nucleotide-binding protein beta subunit-like protein   | <i>Chlamydomonas reinhardtii</i> | 122.0 | 130.1 | 116.8 | 1.1 | 0.1 | 1.2 | 0.2 |
| 894 | 023h10 | AV625641 | LCO95h01  | Guanylate cyclase 1, soluble, alpha 2                          | <i>Bos taurus</i>                | 10.4  | 9.6   | 12.9  | 1.0 | 0.2 | 0.9 | 0.3 |
| 895 | 024i10 | BP383833 | LCL006f08 | Guanylate cyclase A                                            | <i>Rattus sp.</i>                | 7.1   | 6.0   | 4.3   | 0.9 | 0.2 | 1.5 | 0.5 |
| 896 | 132f05 | AV644774 | HCL093e11 | Guanylate cyclase soluble, alpha-1 chain                       |                                  | 21.1  | 19.2  | 25.2  | 0.9 | 0.1 | 0.8 | 0.2 |
| 897 | 032e09 | BP093433 | MXL008d02 | Guanylate cyclase, soluble, beta 2                             | <i>Rattus norvegicus</i>         | 26.0  | 21.8  | 28.5  | 0.8 | 0.1 | 0.8 | 0.1 |
| 898 | 027f11 | AV629346 | LCL057a07 | Guanylyl cyclase                                               | <i>Rattus norvegicus</i>         | 8.4   | 9.0   | 6.3   | 1.0 | 0.2 | 1.6 | 0.8 |
| 899 | 014g09 | AV640455 | HCL016e12 | H <sup>+</sup> -transporting ATP synthase                      | <i>Chlamydomonas reinhardtii</i> | 62.0  | 50.7  | 59.0  | 0.8 | 0.0 | 0.9 | 0.1 |
| 900 | 124g01 | AV640230 | HCL012f02 | H <sup>+</sup> -transporting ATPase                            | <i>Heterosigma akashiwo</i>      | 35.0  | 38.7  | 16.2  | 1.1 | 0.2 | 2.6 | 0.7 |
| 901 | 026e03 | AV628359 | LCL040e11 | H <sup>+</sup> -transporting ATPase                            | <i>Heterosigma akashiwo</i>      | 22.9  | 22.8  | 9.6   | 1.0 | 0.1 | 2.4 | 0.2 |
| 902 | 004g09 | AV387108 | CM013g12  | H <sup>+</sup> -transporting ATPase subunit 9                  | <i>Prototheca wickerhamii</i>    | 91.0  | 78.2  | 117.3 | 0.9 | 0.2 | 0.7 | 0.2 |
| 903 | 031b05 | BP086554 | MX011d03  | h43, high-CO2 inducible, periplasmic protein                   | <i>Chlamydomonas reinhardtii</i> | 42.3  | 23.7  | 72.7  | 0.7 | 0.5 | 0.3 | 0.1 |
| 904 | 133b02 | AV644964 | HCL096b02 | hat1539 protein, cyclophilin                                   | <i>Homo sapiens</i>              | 16.3  | 13.7  | 16.2  | 0.8 | 0.1 | 0.8 | 0.1 |
| 905 | 114c06 | AV389154 | CM074h04  | HAL3 homolog                                                   | <i>Arabidopsis thaliana</i>      | 42.0  | 50.1  | 48.0  | 1.2 | 0.0 | 1.0 | 0.1 |
| 906 | 162h03 | BP093968 | MXL016d04 | Haphaestrin                                                    | <i>Mus musculus</i>              | 14.9  | 13.0  | 29.6  | 0.9 | 0.2 | 0.5 | 0.3 |
| 907 | 012g04 | AV637329 | HC071g01  | HBSu protein                                                   | <i>Artificial gene</i>           | 26.6  | 25.2  | 27.1  | 1.1 | 0.5 | 0.9 | 0.2 |
| 908 | 005a04 | AV388208 | CM017d10  | HCF136 protein                                                 | <i>Arabidopsis thaliana</i>      | 22.4  | 25.2  | 21.4  | 1.1 | 0.1 | 1.2 | 0.3 |
| 909 | 030h04 | BP086220 | MX004d06  | Hd1 protein                                                    | <i>Oryza sativa</i>              | 24.4  | 48.8  | 35.8  | 2.1 | 0.7 | 1.4 | 0.2 |
| 910 | 033g07 | BP094894 | MXL031h03 | Heat shock 22K protein                                         | <i>Chlamydomonas reinhardtii</i> | 12.6  | 10.6  | 14.9  | 0.9 | 0.1 | 0.7 | 0.1 |
| 911 | 168e01 | BP096531 | MXL060c06 | Heat shock 22K protein                                         | <i>Chlamydomonas reinhardtii</i> | 6.9   | 7.9   | 11.8  | 1.2 | 0.3 | 0.7 | 0.2 |
| 912 | 035g09 | BP097403 | MXL075b07 | Heat shock 22K protein                                         | <i>Chlamydomonas reinhardtii</i> | 5.3   | 5.4   | 8.4   | 1.1 | 0.4 | 0.7 | 0.2 |
| 913 | 169c06 | BP096899 | MXL066g02 | Heat shock 22K protein                                         | <i>Chlamydomonas reinhardtii</i> | 7.4   | 6.2   | 11.2  | 0.8 | 0.1 | 0.6 | 0.1 |
| 914 | 158e09 | BP087662 | MX040e12  | Heat shock 22K protein                                         | <i>Chlamydomonas reinhardtii</i> | 5.9   | 5.6   | 13.1  | 1.0 | 0.2 | 0.5 | 0.2 |
| 915 | 149a01 | AV628277 | LCL039e03 | Heat shock cognate protein 80                                  | <i>Lycopersicon esculentum</i>   | 47.1  | 14.6  | 25.8  | 0.3 | 0.1 | 0.6 | 0.0 |
| 916 | 169g04 | BP097100 | MXL070a07 | Heat shock protein                                             | <i>Plectonema boryanum</i>       | 18.0  | 12.0  | 17.4  | 0.7 | 0.5 | 0.8 | 0.6 |
| 917 | 156d03 | BP086064 | MX001c01  | Heat shock protein 101                                         | <i>Arabidopsis thaliana</i>      | 9.9   | 18.0  | 12.6  | 1.9 | 0.6 | 1.4 | 0.1 |
| 918 | 002a03 | AV394805 | CL28a09   | Heat shock protein 70B                                         | <i>Chlamydomonas reinhardtii</i> | 20.3  | 26.7  | 20.4  | 1.9 | 1.3 | 1.3 | 0.1 |
| 919 | 007a01 | AV390901 | CM048h02  | Heat shock protein 70B                                         | <i>Chlamydomonas reinhardtii</i> | 33.3  | 52.4  | 44.4  | 1.6 | 0.6 | 1.2 | 0.6 |
| 920 | 171e01 | AV636097 | HC055b04  | Heat shock protein 70B                                         | <i>Chlamydomonas reinhardtii</i> | 63.1  | 89.9  | 88.7  | 1.5 | 0.7 | 1.0 | 0.3 |
| 921 | 029d08 | AV630829 | LCL084h04 | Heat shock protein 70B                                         | <i>Chlamydomonas reinhardtii</i> | 43.6  | 57.5  | 64.4  | 1.3 | 0.4 | 1.0 | 0.4 |
| 922 | 032f08 | BP093527 | MXL009f08 | Heat shock protein 82                                          | <i>Lycopersicon esculentum</i>   | 33.4  | 15.1  | 25.2  | 0.5 | 0.1 | 0.6 | 0.1 |
| 923 | 159f09 | BP087990 | MX048h03  | Heat shock protein 90                                          | <i>Oryza sativa</i>              | 19.0  | 13.6  | 17.3  | 0.7 | 0.2 | 0.8 | 0.1 |
| 924 | 160g11 | BP089304 | MX20407   | Heat shock protein 90 homolog                                  | <i>Hordeum vulgare</i>           | 19.3  | 7.5   | 17.0  | 0.4 | 0.2 | 0.5 | 0.2 |
| 925 | 167c07 | BP095973 | MXL050c12 | Heat shock protein 91                                          | <i>Arabidopsis thaliana</i>      | 10.2  | 7.5   | 8.4   | 0.8 | 0.3 | 0.9 | 0.1 |
| 926 | 157e02 | BP098841 | MXL100a09 | Heat shock protein 91                                          | <i>Arabidopsis thaliana</i>      | 29.0  | 17.3  | 28.9  | 0.6 | 0.0 | 0.7 | 0.2 |
| 927 | 020g01 | AV621381 | LCO35c04  | Heat shock protein Ddj1                                        | <i>Dictyostelium discoideum</i>  | 7.3   | 6.4   | 4.6   | 0.9 | 0.0 | 1.5 | 0.4 |
| 928 | 170a08 | BP097222 | MXL072a09 | Heat shock protein hslIV, proteasome-related peptidase subunit | <i>Mesorhizobium loti</i>        | 12.3  | 10.9  | 5.3   | 0.9 | 0.2 | 3.1 | 2.5 |
| 929 | 036h04 | BP098814 | MXL099e08 | Heat-shock protein                                             | <i>Arabidopsis thaliana</i>      | 18.7  | 13.5  | 20.6  | 0.7 | 0.1 | 0.8 | 0.4 |
| 930 | 119a12 | AV634573 | HC035b02  | Heat-shock protein 90                                          | <i>Griffithsia japonica</i>      | 22.3  | 14.2  | 16.2  | 0.6 | 0.1 | 1.1 | 0.5 |
| 931 | 119b05 | AV634642 | HC035h12  | Helicase-like protein                                          | <i>Nicotiana sylvestris</i>      | 36.0  | 24.4  | 39.3  | 0.7 | 0.0 | 0.7 | 0.2 |
| 932 | 031e10 | BP087023 | MX023a10  | Heme oxygenase 1                                               | <i>Arabidopsis thaliana</i>      | 31.4  | 48.5  | 43.9  | 1.6 | 0.2 | 1.1 | 0.3 |
| 933 | 130f01 | AV643577 | HCL072b06 | Hephaestrin                                                    | <i>Homo sapiens</i>              | 24.2  | 20.6  | 29.5  | 0.9 | 0.2 | 0.7 | 0.2 |
| 934 | 028h06 | AV630352 | LCL077f11 | Hephaestrin                                                    | <i>Mus musculus</i>              | 17.9  | 14.8  | 24.5  | 0.8 | 0.2 | 0.6 | 0.1 |
| 935 | 019b08 | AV619634 | LCO11a11  | Hephaestrin                                                    | <i>Mus musculus</i>              | 20.9  | 15.   |       |     |     |     |     |

|      | A      | B        | C         | D                                                 | E                                    | F     | G     | H     | I    | J   | K   | L   |
|------|--------|----------|-----------|---------------------------------------------------|--------------------------------------|-------|-------|-------|------|-----|-----|-----|
| 961  | 012d04 | AV636633 | HC062b04  | Hydroxyproline rich glycoprotein PSHRGP1          | <i>Pisum sativum</i>                 | 86.4  | 108.1 | 54.9  | 1.2  | 0.3 | 2.0 | 0.7 |
| 962  | 157e09 | BP087034 | MX023d06  | Hydroxyproline-rich glycoprotein                  | <i>Chlamydomonas reinhardtii</i>     | 18.7  | 28.1  | 10.7  | 1.6  | 0.2 | 2.8 | 1.1 |
| 963  | 131h08 | AV644370 | HCL087b12 | Hydroxyproline-rich glycoprotein                  | <i>Chlamydomonas reinhardtii</i>     | 80.4  | 123.1 | 71.3  | 1.5  | 0.1 | 1.7 | 0.9 |
| 964  | 171d05 | BP097910 | MXL083d07 | Hydroxyproline-rich glycoprotein                  | <i>Chlamydomonas reinhardtii</i>     | 76.7  | 87.5  | 88.3  | 1.2  | 0.1 | 1.0 | 0.1 |
| 965  | 141g11 | AV624774 | LC082e07  | Hydroxyproline-rich glycoprotein DZ-HRGP          | <i>Volvox carteri f. nagariensis</i> | 7.6   | 21.7  | 15.1  | 2.8  | 0.7 | 1.4 | 0.3 |
| 966  | 161h04 | BP093367 | MXL007d12 | Hydroxyproline-rich glycoprotein DZ-HRGP          | <i>Volvox carteri f. nagariensis</i> | 13.6  | 13.0  | 15.5  | 0.8  | 0.5 | 1.2 | 1.2 |
| 967  | 137a06 | BP098776 | MXL098h12 | Hydroxyproline-rich glycoprotein DZ-HRGP          | <i>Volvox carteri f. nagariensis</i> | 12.4  | 11.7  | 10.3  | 0.9  | 0.2 | 1.1 | 0.3 |
| 968  | 127a12 | AV641630 | HCL037g08 | Hydroxyproline-rich glycoprotein DZ-HRGP          | <i>Volvox carteri f. nagariensis</i> | 19.9  | 15.9  | 20.8  | 0.9  | 0.3 | 0.8 | 0.1 |
| 969  | 170g02 | BP097564 | MXL077g10 | Hydroxyproline-rich glycoprotein DZ-HRGP          | <i>Volvox carteri f. nagariensis</i> | 15.4  | 9.5   | 15.6  | 0.6  | 0.4 | 0.7 | 0.6 |
| 970  | 161e07 | BP093209 | MXL005a05 | Hydroxyproline-rich glycoprotein DZ-HRGP          | <i>Volvox carteri f. nagariensis</i> | 29.3  | 46.7  | 79.8  | 1.6  | 0.2 | 0.6 | 0.1 |
| 971  | 032e03 | BP093359 | MXL007d01 | Hydroxyproline-rich glycoprotein DZ-HRGP          | <i>Volvox carteri f. nagariensis</i> | 13.4  | 24.9  | 43.3  | 1.9  | 0.7 | 0.6 | 0.0 |
| 972  | 157b04 | BP086600 | MX012e12  | Hydroxyproline-rich glycoprotein gas28p precursor | <i>Chlamydomonas reinhardtii</i>     | 9.4   | 26.9  | 15.0  | 3.1  | 0.5 | 2.5 | 1.3 |
| 973  | 149e02 | AV628512 | LCL043a09 | HYP A protein                                     | <i>Clostridium perfringens</i>       | 41.6  | 38.5  | 63.1  | 0.9  | 0.1 | 0.7 | 0.3 |
| 974  | 014h08 | AV640542 | HCL018a09 | Hypothetical 102.7 KD protein                     | <i>Arabidopsis thaliana</i>          | 16.7  | 16.7  | 12.4  | 1.0  | 0.4 | 1.5 | 0.8 |
| 975  | 121c02 | AV636381 | HC058g05  | Hypothetical 12.9 KD protein slr1417              | <i>Synechocystis sp. PCC 6803</i>    | 11.4  | 28.3  | 23.0  | 2.5  | 0.4 | 1.2 | 0.2 |
| 976  | 107c04 | AV386707 | CM008b05  | Hypothetical 15.3 KD protein                      | <i>Escherichia coli</i>              | 18.3  | 13.3  | 19.7  | 0.7  | 0.2 | 0.7 | 0.3 |
| 977  | 139h10 | AV623493 | LC064f04  | Hypothetical 24.2 KD protein                      | <i>Homo sapiens</i>                  | 6.9   | 6.1   | 5.3   | 1.0  | 0.4 | 1.2 | 0.5 |
| 978  | 136g03 | AV620858 | LC027g05  | Hypothetical 29.6 KD protein                      | <i>Azotobacter vinelandii</i>        | 6.2   | 8.7   | 7.3   | 1.4  | 0.4 | 1.2 | 0.2 |
| 979  | 125b10 | AV640474 | HCL016h12 | Hypothetical 42.1 KD protein                      | <i>Arabidopsis thaliana</i>          | 14.5  | 13.1  | 15.5  | 0.9  | 0.1 | 0.9 | 0.1 |
| 980  | 104e08 | AV395943 | CL51b07   | Hypothetical 49.1 KD protein                      | <i>Oryza sativa</i>                  | 3.2   | 2.9   | 2.6   | 1.0  | 0.4 | 1.1 | 0.3 |
| 981  | 151b03 | AV629341 | LCL056h05 | Hypothetical 50.0 KD protein slr0076              | <i>Synechocystis sp. PCC 6803</i>    | 9.1   | 7.6   | 5.9   | 0.9  | 0.3 | 1.3 | 0.2 |
| 982  | 016h06 | AV642686 | HCL056a11 | Hypothetical 51.0 KD protein slr0096              | <i>Synechocystis sp. PCC 6803</i>    | 5.9   | 5.7   | 5.8   | 1.0  | 0.1 | 1.0 | 0.4 |
| 983  | 104d04 | AV397710 | CL49b11   | Hypothetical 52.8 KD protein slr0074              | <i>Synechocystis sp. PCC 6803</i>    | 23.6  | 23.0  | 27.0  | 1.0  | 0.0 | 0.9 | 0.1 |
| 984  | 162f04 | BP093836 | MXL014e03 | Hypothetical 65.1 KD protein slr1919              | <i>Synechocystis sp. PCC 6803</i>    | 10.0  | 10.9  | 9.4   | 1.1  | 0.2 | 1.1 | 0.3 |
| 985  | 010g05 | AV633518 | HC021g02  | Hypothetical 66.0 KD GTP-binding protein slr1105  | <i>Synechocystis sp. PCC 6803</i>    | 12.6  | 11.3  | 14.5  | 0.9  | 0.1 | 0.9 | 0.5 |
| 986  | 114e06 | AV388566 | CM077g09  | Hypothetical 66.5 KD                              | <i>Dictyostellium discoideum</i>     | 9.1   | 11.4  | 7.5   | 1.3  | 0.3 | 1.5 | 0.3 |
| 987  | 148b02 | AV627844 | LCL032g11 | Hypothetical 69.1 KD protein (ORF4)               | <i>Arabidopsis thaliana</i>          | 13.6  | 11.5  | 9.1   | 0.9  | 0.2 | 1.4 | 0.4 |
| 988  | 033e06 | BP094472 | MXL023f02 | Hypothetical 77.3 KD protein slr0005              | <i>Synechocystis sp. PCC 6803</i>    | 10.0  | 10.8  | 10.3  | 1.1  | 0.1 | 1.1 | 0.1 |
| 989  | 025b04 | AV627123 | LCL021d12 | Hypothetical 77.3 KD protein slr0005              | <i>Synechocystis sp. PCC 6803</i>    | 13.4  | 9.9   | 9.8   | 0.7  | 0.1 | 1.0 | 0.1 |
| 990  | 026g09 | AV628553 | LCL043f08 | Hypothetical 77.3 KD protein slr0005              | <i>Synechocystis sp. PCC 6803</i>    | 8.7   | 8.5   | 9.6   | 1.0  | 0.1 | 0.9 | 0.1 |
| 991  | 008g02 | AV389443 | CM075e10  | hypothetical chloroplast RF19                     | <i>Guillardia theta</i>              | 9.5   | 8.5   | 7.5   | 0.9  | 0.1 | 1.1 | 0.0 |
| 992  | 009a05 | AV390238 | CM082b02  | hypothetical chloroplast RF19                     | <i>Guillardia theta</i>              | 25.5  | 18.0  | 19.3  | 0.7  | 0.1 | 0.9 | 0.1 |
| 993  | 002f11 | AV395652 | CL46c07   | Hypothetical GTP-binding protein                  | <i>Arabidopsis thaliana</i>          | 5.1   | 3.4   | 4.2   | 0.7  | 0.0 | 0.8 | 0.3 |
| 994  | 019g12 | AV620297 | LC020c02  | Hypothetical protein                              | <i>Arabidopsis thaliana</i>          | 15.7  | 178.9 | 70.9  | 12.0 | 5.6 | 2.5 | 0.2 |
| 995  | 136b11 | AV620572 | LC023h04  | Hypothetical protein                              | <i>Streptomyces coelicolor</i>       | 17.4  | 32.1  | 13.9  | 1.9  | 1.1 | 2.4 | 1.5 |
| 996  | 138d12 | AV622278 | LC047e04  | Hypothetical protein                              | <i>Homo sapiens</i>                  | 10.5  | 16.6  | 10.0  | 1.6  | 0.5 | 1.8 | 0.8 |
| 997  | 010b01 | AV632208 | HC005c10  | Hypothetical protein                              | <i>Nostoc sp. PCC 7120</i>           | 27.1  | 30.8  | 21.3  | 1.2  | 0.5 | 1.7 | 1.1 |
| 998  | 024a06 | AV626279 | LCL005f11 | Hypothetical protein                              | <i>Arabidopsis thaliana</i>          | 14.1  | 180.4 | 110.5 | 12.8 | 0.2 | 1.7 | 0.4 |
| 999  | 114b10 | AV388962 | CM074a06  | Hypothetical protein                              | <i>Synechocystis sp. PCC 6803</i>    | 6.5   | 8.3   | 5.2   | 1.3  | 0.3 | 1.7 | 0.5 |
| 1000 | 135g08 | AV620224 | LC019c04  | Hypothetical protein                              | <i>Synechocystis sp. PCC 6803</i>    | 18.1  | 19.2  | 12.8  | 1.1  | 0.0 | 1.5 | 0.2 |
| 1001 | 131a12 | AV643867 | HCL077d10 | Hypothetical protein                              | <i>Chlamydia trachomatis</i>         | 21.0  | 18.7  | 12.5  | 0.9  | 0.1 | 1.5 | 0.2 |
| 1002 | 154a02 | AV630748 | LCL083g01 | Hypothetical protein                              | <i>Synechocystis sp. PCC 6803</i>    | 12.1  | 13.9  | 9.7   | 1.2  | 0.3 | 1.4 | 0.2 |
| 1003 | 031g01 | BP087276 | MX030c03  | Hypothetical protein                              | <i>Synechocystis sp. PCC 6803</i>    | 28.1  | 24.2  | 17.1  | 0.9  | 0.3 | 1.4 | 0.3 |
| 1004 | 163e07 | BP094319 | MXL021b10 | Hypothetical protein                              | <i>Synechocystis sp. PCC 6803</i>    | 7.9   | 22.1  | 16.7  | 2.8  | 0.3 | 1.3 | 0.1 |
| 1005 | 138e12 | AV622355 | LC048e10  | Hypothetical protein                              | <i>Synechocystis sp. PCC 6803</i>    | 5.8   | 9.0   | 7.0   | 1.5  | 0.3 | 1.3 | 0.2 |
| 1006 | 015a12 | AV640719 | HCL021c04 | Hypothetical protein                              | <i>Schizosaccharomyces pombe</i>     | 22.3  | 12.5  | 11.4  | 0.6  | 0.2 | 1.3 | 0.8 |
| 1007 | 020b01 | AV620748 | LC026c12  | Hypothetical protein                              | <i>Arabidopsis thaliana</i>          | 39.2  | 30.2  | 25.0  | 0.9  | 0.3 | 1.3 | 0.6 |
| 1008 | 022c01 | AV623513 | LC064h10  | Hypothetical protein                              | <i>Arabidopsis thaliana</i>          | 7.8   | 6.6   | 5.7   | 0.9  | 0.4 | 1.2 | 0.3 |
| 1009 | 139g11 | AV623397 | LC063b10  | Hypothetical protein                              | <i>Arabidopsis thaliana</i>          | 11.3  | 9.1   | 8.2   | 0.8  | 0.3 | 1.2 | 0.5 |
| 1010 | 147b03 | AV627388 | LCL026a07 | Hypothetical protein                              | <i>Oryza sativa</i>                  | 9.6   | 8.8   | 8.1   | 0.9  | 0.1 | 1.2 | 0.4 |
| 1011 | 112e12 | AV392025 | CM058b01  | Hypothetical protein                              | <i>Synechocystis sp. PCC 6803</i>    | 7.0   | 6.3   | 5.2   | 0.9  | 0.3 | 1.2 | 0.2 |
| 1012 | 010h12 | AV633849 | HC026a10  | Hypothetical protein                              | <i>Arabidopsis thaliana</i>          | 9.5   | 9.5   | 8.0   | 1.0  | 0.2 | 1.2 | 0.4 |
| 1013 | 034h12 | BP096487 | MXL059e08 | Hypothetical protein                              | <i>Schizosaccharomyces pombe</i>     | 9.6   | 9.5   | 9.1   | 1.0  | 0.2 | 1.2 | 0.6 |
| 1014 | 134c10 | AV619173 | LC004g04  | Hypothetical protein                              | <i>Arabidopsis thaliana</i>          | 14.6  | 9.9   | 9.6   | 0.7  | 0.2 | 1.2 | 0.7 |
| 1015 | 005c02 | AV397483 | CM020h08  | Hypothetical protein                              | <i>Cicer arietinum</i>               | 19.9  | 13.9  | 12.2  | 0.9  | 0.4 | 1.1 | 0.3 |
| 1016 | 022c08 | AV623614 | LC066c11  | Hypothetical protein                              | <i>Pseudomonas aeruginosa</i>        | 32.7  | 77.2  | 76.1  | 2.4  | 0.4 | 1.1 | 0.5 |
| 1017 | 127g11 | AV642007 | HCL043g11 | Hypothetical protein                              | <i>Leishmania major</i>              | 139.8 | 109.8 | 95.9  | 0.8  | 0.0 | 1.1 | 0.0 |
| 1018 | 011e07 | AV635089 | HC041g03  | Hypothetical protein                              | <i>Synechocystis sp. PCC 6803</i>    | 32.3  | 33.1  | 31.8  | 1.1  | 0.3 | 1.1 | 0.5 |
| 1019 | 141d07 | AV624461 | LC078a12  | Hypothetical protein                              | <i>Synechocystis sp. PCC 6803</i>    | 12.4  | 12.7  | 11.3  | 1.0  | 0.1 | 1.1 | 0.2 |
| 1020 | 108a06 | AV387428 | CM015h11  | Hypothetical protein                              | <i>Saccharomyces cerevisiae</i>      | 11.0  | 10.1  | 9.2   | 0.9  | 0.1 | 1.1 | 0.2 |
| 1021 | 030c09 | AV631525 | LCL095f07 | Hypothetical protein                              | <i>Arabidopsis thaliana</i>          | 21.2  | 33.2  | 30.5  | 1.6  | 0.4 | 1.1 | 0.2 |
| 1022 | 016a06 | AV641589 | HCL038h09 | Hypothetical protein                              | <i>Synechocystis sp. PCC 6803</i>    | 1.5   | 1.3   | 1.3   | 1.0  | 0.4 | 1.1 | 0.5 |
| 1023 | 132g08 | AV644825 | HCL094c08 | Hypothetical protein                              | <i>Arabidopsis thaliana</i>          | 18.4  | 17.9  | 16.6  | 1.0  | 0.0 | 1.1 | 0.2 |
| 1024 | 120g06 | AV636401 | HC059a05  | Hypothetical protein                              | <i>Homo sapiens</i>                  | 60.7  | 58.9  | 58.5  | 1.0  | 0.1 | 1.1 | 0.3 |
| 1025 | 020b09 | AV620822 | LC027c10  | Hypothetical protein                              | <i>Synechocystis sp. PCC 6803</i>    | 8.9   | 12.4  | 12.6  | 1.4  | 0.2 | 1.0 | 0.3 |
| 1026 | 019f09 | AV620139 | LC018b02  | Hypothetical protein                              | <i>Arabidopsis thaliana</i>          | 9.2   | 6.9   | 7.3   | 0.8  | 0.1 | 1.0 | 0.4 |
| 1027 | 144a01 | AV626060 | LCL001g12 | Hypothetical protein                              | <i>Nicotiana tabacum</i>             | 32.6  | 15.5  | 15.3  | 0.5  | 0.2 | 1.0 | 0.2 |
| 1028 | 017d05 | AV643204 | HCL065f01 | Hypothetical protein                              | <i>Arabidopsis thaliana</i>          | 4.6   | 5.1   | 5.1   | 1.1  | 0.3 | 1.0 | 0.2 |
| 1029 | 109c01 | AV388257 | CM024g12  | Hypothetical protein                              | <i>Synechocystis sp. PCC 6803</i>    | 5.9   | 9.6   | 9.7   | 1.6  | 0.2 | 1.0 | 0.2 |
| 1030 | 154d03 | AV630941 | LCL086f06 | Hypothetical protein                              | <i>Synechocystis sp. PCC 6803</i>    | 6.7   | 5.9   | 6.1   | 0.9  | 0.1 | 1.0 | 0.3 |
| 1031 | 036c05 | AV396195 | CL58e02   | Hypothetical protein                              | <i>Synechocystis sp. PCC 6803</i>    | 6.3   | 7.1   | 7.3   | 1.1  | 0.1 | 1.0 | 0.1 |
| 1032 | 156e11 | BP086206 | MX004a11  | Hypothetical protein                              | <i>Synechocystis sp. PCC 6803</i>    | 20.1  | 15.3  | 15.9  | 0.8  | 0.3 | 1.0 | 0.4 |
| 1033 | 141d10 | AV624471 | LC078b10  | Hypothetical protein                              | <i>Synechocystis sp. PCC 6803</i>    | 11.7  | 12.2  | 12.9  | 1.1  | 0.1 | 1.0 | 0.1 |
| 1034 | 141c07 | AV624381 | LC077a05  | Hypothetical protein                              | <i>Synechocystis sp. PCC 6803</i>    | 16.3  | 15.8  | 16.7  | 1.0  | 0.2 | 1.0 | 0.1 |
| 1035 | 006e06 | AV390049 | CM041h02  | Hypothetical protein                              | <i>Arabidopsis thaliana</i>          | 9.8   | 10.3  | 11.5  | 1.1  | 0.2 | 0.9 | 0.3 |
| 1036 | 027c04 | AV629067 | LCL051c06 | Hypothetical protein                              | <i>Arabidopsis thaliana</i>          | 19.3  | 19.8  | 21.8  | 1.0  | 0.1 | 0.9 | 0.2 |
| 1037 | 022b08 | AV623497 | LC064f12  | Hypothetical protein                              | <i>Homo sapiens</i>                  | 10.2  | 10.5  | 11.0  | 1.0  | 0.3 | 0.9 | 0.1 |
| 1038 | 018a01 | AV644067 | HCL081b04 | Hypothetical protein                              | <i>Schizosaccharomyces pombe</i>     | 10.7  | 21.8  | 27.7  | 2.1  | 0.7 | 0.9 | 0.5 |
| 1039 | 165f11 | BP095312 | MXL039g07 | Hypothetical protein                              | <i>Homo sapiens</i>                  | 9.3   | 7.7   | 8.4   | 0.8  | 0.1 | 0.9 | 0.1 |
| 1040 | 035g05 | BP097376 | MXL074f08 | Hypothetical protein                              | <i>Picea mariana</i>                 | 10.0  | 9.8   | 11.6  | 1.0  | 0.1 | 0.9 | 0.4 |
| 1041 | 111d01 | AV390465 | CM046e07  | Hypothetical protein                              |                                      |       |       |       |      |     |     |     |

|      | A      | B        | C         | D                                                | E                                 | F     | G     | H     | I   | J   | K     | L     |
|------|--------|----------|-----------|--------------------------------------------------|-----------------------------------|-------|-------|-------|-----|-----|-------|-------|
| 1068 | 170h12 | BP097666 | MXL079d01 | Hypothetical protein F17M5.130                   | <i>Arabidopsis thaliana</i>       | 6.7   | 5.8   | 7.1   | 0.9 | 0.5 | 0.8   | 0.4   |
| 1069 | 160a04 | BP088263 | MX055g01  | Hypothetical protein F19J3.9                     | <i>Arabidopsis thaliana</i>       | 23.9  | 21.0  | 16.4  | 0.9 | 0.5 | 1.9   | 1.6   |
| 1070 | 164a12 | BP094632 | MXL026a06 | Hypothetical protein F20M13.30                   | <i>Arabidopsis thaliana</i>       | 11.9  | 18.4  | 8.1   | 1.6 | 0.5 | 3.7   | 2.9   |
| 1071 | 013d10 | AV638680 | HC089d03  | Hypothetical protein F23E12.190                  | <i>Arabidopsis thaliana</i>       | 7.7   | 7.9   | 11.8  | 1.0 | 0.2 | 0.7   | 0.3   |
| 1072 | 161b07 | BP092969 | MXL001e10 | Hypothetical protein F24L7.13                    | <i>Arabidopsis thaliana</i>       | 144.0 | 236.6 | 98.8  | 1.7 | 0.2 | 2.8   | 1.7   |
| 1073 | 127h01 | AV642016 | HCL044a02 | Hypothetical protein F26A1.11                    | <i>Caenorhabditis elegans</i>     | 53.0  | 52.7  | 21.7  | 1.1 | 0.3 | 2.6   | 1.0   |
| 1074 | 168f01 | BP096595 | MXL061d01 | Hypothetical protein F27B13.110                  | <i>Arabidopsis thaliana</i>       | 14.5  | 10.7  | 12.5  | 0.8 | 0.1 | 0.9   | 0.1   |
| 1075 | 015f08 | AV641292 | HCL031b08 | Hypothetical protein F3I6.12                     | <i>Arabidopsis thaliana</i>       | 2.4   | 2.6   | 3.5   | 1.2 | 0.5 | 0.7   | 0.2   |
| 1076 | 030h10 | BP086291 | MX005h10  | Hypothetical protein F6E13.4                     | <i>Arabidopsis thaliana</i>       | 9.5   | 14.5  | 14.8  | 1.5 | 0.5 | 1.0   | 0.5   |
| 1077 | 169a12 | BP096828 | MXL065e08 | Hypothetical protein FLJ20113                    | <i>Arabidopsis thaliana</i>       | 15.8  | 19.3  | 10.4  | 1.2 | 0.2 | 3.8   | 3.3   |
| 1078 | 028a04 | AV629563 | LCL061a08 | Hypothetical protein H04M03.4                    | <i>Caenorhabditis elegans</i>     | 40.0  | 36.1  | 34.4  | 1.0 | 0.2 | 1.2   | 0.4   |
| 1079 | 110d08 | AV389290 | CM036a02  | Hypothetical protein MGC6623                     | <i>Mus musculus</i>               | 71.7  | 38.3  | 83.3  | 0.5 | 0.3 | 0.4   | 0.2   |
| 1080 | 036c03 | BP097951 | MXL084a09 | Hypothetical protein MLCB1222.15                 | <i>Mycobacterium leprae</i>       | 8.1   | 8.7   | 9.5   | 1.1 | 0.4 | 1.1   | 0.4   |
| 1081 | 135c03 | AV196877 | LCO13h06  | Hypothetical protein Rv0068                      | <i>Mycobacterium tuberculosis</i> | 21.8  | 16.9  | 17.4  | 0.8 | 0.2 | 1.0   | 0.4   |
| 1082 | 034e04 | BP095866 | MXL048e07 | Hypothetical protein Rv1373                      | <i>Mycobacterium tuberculosis</i> | 10.1  | 6.0   | 4.2   | 0.6 | 0.1 | 1.5   | 0.2   |
| 1083 | 157g12 | BP087175 | MX027d05  | Hypothetical protein sir0825                     | <i>Synechocystis sp. PCC 6803</i> | 5.9   | 8.3   | 9.1   | 1.4 | 0.1 | 0.9   | 0.2   |
| 1084 | 159g06 | BP088089 | MX051c05  | Hypothetical protein sir0825                     | <i>Synechocystis sp. PCC 6803</i> | 9.4   | 10.3  | 11.7  | 1.2 | 0.6 | 0.9   | 0.5   |
| 1085 | 170d03 | BP097391 | MXL074h08 | Hypothetical protein T12H20.3                    | <i>Arabidopsis thaliana</i>       | 10.3  | 7.6   | 9.6   | 0.7 | 0.1 | 0.8   | 0.3   |
| 1086 | 170b10 | BP097298 | MXL073c03 | Hypothetical protein T13K14.10                   | <i>Arabidopsis thaliana</i>       | 17.1  | 19.5  | 19.7  | 1.2 | 0.5 | 1.0   | 0.3   |
| 1087 | 171f05 | BP098007 | MXL085c04 | Hypothetical protein T21L8.140                   | <i>Arabidopsis thaliana</i>       | 45.2  | 19.9  | 57.4  | 0.5 | 0.2 | 0.5   | 0.4   |
| 1088 | 122g11 | AV638900 | HC092e08  | Hypothetical protein T24A18.30                   | <i>Arabidopsis thaliana</i>       | 13.5  | 10.4  | 10.3  | 0.8 | 0.1 | 1.1   | 0.3   |
| 1089 | 004g04 | AV387106 | CM013c12  | Hypothetical protein TM1267                      | <i>Thermotoga maritima</i>        | 15.6  | 21.9  | 6.8   | 1.4 | 0.1 | 3.4   | 1.2   |
| 1090 | 159b05 | BP087741 | MX042i09  | Hypothetical protein Y48E1B.10                   | <i>Caenorhabditis elegans</i>     | 7.3   | 6.9   | 8.7   | 1.0 | 0.2 | 0.8   | 0.2   |
| 1091 | 168b04 | BP096323 | MXL056g03 | Hypothetical protein YUP8H12R.38                 | <i>Arabidopsis thaliana</i>       | 5.7   | 7.9   | 4.0   | 1.5 | 0.6 | 2.5   | 1.5   |
| 1092 | 171c07 | BP097822 | MXL081h06 | Hypothetical protein ZK520.3                     | <i>Caenorhabditis elegans</i>     | 10.1  | 13.3  | 9.2   | 1.4 | 0.3 | 1.5   | 0.4   |
| 1093 | 020c09 | AV620923 | LCO28f07  | Hypothetical protein YOL133w                     | <i>Saccharomyces cerevisiae</i>   | 16.5  | 13.9  | 16.2  | 0.9 | 0.1 | 0.9   | 0.3   |
| 1094 | 163c12 | BP094233 | MXL019h07 | Hypothetical protein PSU1-like protein           | <i>Schizosaccharomyces pombe</i>  | 13.4  | 17.2  | 10.9  | 1.3 | 0.4 | 1.9   | 1.1   |
| 1095 | 010e10 | AV633020 | HC015g02  | Hypothetical Ser-Thr protein kinase              | <i>Arabidopsis thaliana</i>       | 9.4   | 9.3   | 9.8   | 1.0 | 0.3 | 0.9   | 0.3   |
| 1096 | 109g03 | AV388405 | CM029e06  | Hypothetical tRNA/RNA methyl transferase sir0992 | <i>Synechocystis sp. PCC 6803</i> | 8.1   | 7.3   | 5.6   | 0.9 | 0.2 | 1.3   | 0.4   |
| 1097 | 011f06 | AV635262 | HC044a11  | Hypothetical protein                             | <i>Synechocystis sp. PCC 6803</i> | 18.1  | 15.2  | 13.1  | 0.9 | 0.2 | 1.2   | 0.3   |
| 1098 | 017b08 | AV643355 | HCL068b12 | Hypoxanthine-guanine phosphoribosyl transferase  | <i>Mycobacterium avium</i>        | 8.9   | 4.3   | 5.8   | 0.5 | 0.1 | 0.7   | 0.2   |
| 1099 | 300b04 | AV631393 | LCL093b10 | IAA-amino acid hydrolase homolog ILL3            | <i>Arabidopsis thaliana</i>       | 13.9  | 9.6   | 12.9  | 0.7 | 0.1 | 0.8   | 0.1   |
| 1100 | 018e05 | AV644915 | HCL095e01 | I-box binding factor                             | <i>Lycopersicon esculentum</i>    | 4.9   | 4.8   | 4.7   | 1.0 | 0.3 | 1.0   | 0.2   |
| 1101 | 115f02 | AV391199 | CM089f01  | IFP53                                            | <i>Homo sapiens</i>               | 6.5   | 5.7   | 5.9   | 0.9 | 0.3 | 1.0   | 0.5   |
| 1102 | 034h06 | BP096413 | MXL058c11 | Import intermediate-associated 100K protein      | <i>Pisum sativum</i>              | 16.8  | 12.5  | 16.6  | 0.8 | 0.2 | 0.8   | 0.2   |
| 1103 | 032b07 | BP093019 | MXL002c03 | Importin alpha-like protein                      | <i>Arabidopsis thaliana</i>       | 17.3  | 16.7  | 17.6  | 1.0 | 0.1 | 1.0   | 0.2   |
| 1104 | 012a01 | AV635778 | HC050g08  | Importin alpha-like protein                      | <i>Arabidopsis thaliana</i>       | 91.5  | 81.1  | 106.9 | 0.9 | 0.1 | 0.8   | 0.3   |
| 1105 | 036h08 | BP098865 | MXL100d09 | Importin-beta1                                   | <i>Oryza sativa</i>               | 5.4   | 5.6   | 6.3   | 1.2 | 0.4 | 1.0   | 0.6   |
| 1106 | 016f01 | AV642351 | HCL050c06 | Importin-beta2                                   | <i>Oryza sativa</i>               | 5.8   | 9.2   | 5.7   | 1.7 | 0.3 | 1.6   | 0.2   |
| 1107 | 036d12 | BP098259 | MXL090c11 | Importin-beta2                                   | <i>Oryza sativa</i>               | 11.5  | 14.7  | 11.2  | 1.3 | 0.3 | 1.4   | 0.4   |
| 1108 | 004c06 | AV386668 | CM004g06  | Initiation factor 5A-3 (eIF-5A) 3                | <i>Lycopersicon esculentum</i>    | 166.7 | 139.2 | 169.1 | 0.8 | 0.1 | 0.8   | 0.1   |
| 1109 | 006g10 | AV390487 | CM046f06  | Initiation factor3g                              | <i>Arabidopsis thaliana</i>       | 23.7  | 12.2  | 15.7  | 0.5 | 0.2 | 0.8   | 0.0   |
| 1110 | 127d01 | AV629118 | LCL052d11 | Inner dynein arm L1 intermediate chain, IC140    | <i>Chlamydomonas reinhardtii</i>  | 1.6   | 0.8   | 0.6   | 0.5 | 0.1 | 174.5 | 346.3 |
| 1111 | 002b04 | AV395009 | CL31b07   | Inner dynein arm L1 intermediate chain, IC140    | <i>Chlamydomonas reinhardtii</i>  | 13.5  | 16.4  | 21.4  | 1.2 | 0.1 | 0.9   | 0.3   |
| 1112 | 032b01 | BP092941 | MXL001b06 | Inorganic pyrophosphatase                        | <i>Nicotiana tabacum</i>          | 46.2  | 51.5  | 44.9  | 1.1 | 0.3 | 1.2   | 0.2   |
| 1113 | 158d09 | BP087649 | MX040c04  | Inorganic pyrophosphatase                        | <i>Oryza sativa</i>               | 46.5  | 21.2  | 31.7  | 0.4 | 0.2 | 0.7   | 0.3   |
| 1114 | 158e12 | BP087668 | MX041a04  | Inorganic pyrophosphatase                        | <i>Oryza sativa</i>               | 41.1  | 16.9  | 31.8  | 0.4 | 0.2 | 0.6   | 0.3   |
| 1115 | 013c12 | AV638476 | HC086h04  | Inorganic pyrophosphatase precursor              | <i>Chlamydomonas reinhardtii</i>  | 32.4  | 26.8  | 28.4  | 0.8 | 0.0 | 1.0   | 0.1   |
| 1116 | 158d05 | BP087644 | MX040b05  | Inorganic pyrophosphatase-like protein           | <i>Arabidopsis thaliana</i>       | 51.6  | 46.4  | 41.9  | 0.9 | 0.4 | 1.1   | 0.4   |
| 1117 | 019g05 | AV620245 | LCO19e04  | Inorganic pyrophosphatase precursor              | <i>Chlamydomonas reinhardtii</i>  | 49.7  | 40.8  | 45.4  | 0.8 | 0.1 | 1.0   | 0.4   |
| 1118 | 136h03 | AV620963 | LC029c08  | Insoluble protein                                | <i>Pinctada fucata</i>            | 19.3  | 18.8  | 15.9  | 1.0 | 0.3 | 1.3   | 0.5   |
| 1119 | 116h04 | AV631976 | HC002d08  | Insoluble protein                                | <i>Pinctada fucata</i>            | 9.2   | 8.4   | 8.6   | 0.9 | 0.1 | 1.0   | 0.1   |
| 1120 | 002h06 | AV395896 | CL51d06   | Insoluble protein                                | <i>Pinctada fucata</i>            | 7.9   | 7.5   | 9.1   | 0.9 | 0.1 | 0.8   | 0.2   |
| 1121 | 130c04 | AV643322 | HCL067e10 | Insoluble protein                                | <i>Pinctada fucata</i>            | 7.0   | 5.8   | 7.8   | 0.8 | 0.1 | 0.7   | 0.1   |
| 1122 | 125c02 | AV640506 | HCL017e07 | Insoluble protein                                | <i>Pinctada fucata</i>            | 13.0  | 10.7  | 15.9  | 0.8 | 0.1 | 0.7   | 0.2   |
| 1123 | 027g08 | AV629431 | LCL058f06 | Integral membrane protein                        | <i>Pseudomonas putida</i>         | 2.2   | 2.4   | 2.6   | 1.1 | 0.2 | 0.9   | 0.2   |
| 1124 | 149b12 | AV628400 | LCL041c01 | Interferon-gamma induced GTPase                  | <i>Mus musculus</i>               | 12.5  | 122.9 | 60.3  | 9.7 | 3.0 | 2.0   | 0.3   |
| 1125 | 032d12 | BP093313 | MXL006f02 | Integral membrane protein 1                      | <i>Arabidopsis thaliana</i>       | 19.0  | 16.3  | 17.8  | 0.9 | 0.2 | 1.0   | 0.3   |
| 1126 | 032c03 | BP093066 | MXL002h07 | Involved in starch metabolism                    | <i>Solanum tuberosum</i>          | 11.2  | 9.1   | 7.2   | 0.8 | 0.1 | 1.4   | 0.6   |
| 1127 | 167a06 | BP095864 | MXL048e05 | Isoamylase 1                                     | <i>Solanum tuberosum</i>          | 18.8  | 31.5  | 22.9  | 1.8 | 0.4 | 1.9   | 1.2   |
| 1128 | 028g09 | AV630278 | LCL076e11 | Isoamylase 1                                     | <i>Triticum aestivum</i>          | 15.9  | 17.4  | 12.5  | 1.1 | 0.1 | 1.4   | 0.3   |
| 1129 | 010f02 | AV633114 | HC016h10  | Isocitrate lyase                                 | <i>Chlamydomonas reinhardtii</i>  | 304.0 | 248.0 | 312.0 | 0.9 | 0.5 | 0.9   | 0.5   |
| 1130 | 117f11 | AV391188 | CM089h01  | Isocitrate lyase                                 | <i>Chlamydomonas reinhardtii</i>  | 209.3 | 167.8 | 242.8 | 0.8 | 0.1 | 0.7   | 0.1   |
| 1131 | 004g07 | AV387040 | CM013g02  | Isocitrate lyase                                 | <i>Chlamydomonas reinhardtii</i>  | 232.8 | 170.0 | 271.9 | 0.7 | 0.2 | 0.6   | 0.2   |
| 1132 | 160f05 | BP088883 | MX102b10  | Isocitrate lyase                                 | <i>Myxococcus xanthus</i>         | 309.6 | 207.5 | 367.4 | 0.7 | 0.0 | 0.6   | 0.2   |
| 1133 | 034a09 | BP095246 | MXL038g08 | Isoleucine-tRNA ligase-like protein              | <i>Arabidopsis thaliana</i>       | 21.9  | 14.4  | 15.3  | 0.7 | 0.1 | 1.2   | 0.8   |
| 1134 | 154f04 | AV631057 | LCL088b12 | Isoleucyl-tRNA synthetase                        | <i>Nostoc sp. PCC 7120</i>        | 25.3  | 18.9  | 29.6  | 0.8 | 0.1 | 0.6   | 0.1   |
| 1135 | 171d11 | BP097934 | MXL083g06 | J1B crystallin                                   | <i>Triptalia cystophora</i>       | 19.5  | 35.6  | 30.8  | 1.8 | 0.2 | 1.2   | 0.3   |
| 1136 | 143e06 | AV625778 | LC097g02  | KIAA0005 gene product-like                       | <i>Arabidopsis thaliana</i>       | 9.5   | 6.0   | 7.4   | 0.7 | 0.3 | 0.8   | 0.3   |
| 1137 | 024e02 | AV626615 | LCL012d01 | KIAA0017 protein                                 | <i>Homo sapiens</i>               | 15.1  | 10.2  | 9.3   | 0.7 | 0.3 | 1.2   | 0.5   |
| 1138 | 158a04 | BP087351 | MX032f12  | KIAA0304 gene product                            | <i>Homo sapiens</i>               | 18.0  | 17.8  | 12.2  | 1.1 | 0.4 | 3.1   | 2.5   |
| 1139 | 120c01 | AV635896 | HC052d04  | KIAA0346                                         | <i>Homo sapiens</i>               | 39.2  | 54.3  | 27.4  | 1.3 | 0.5 | 2.0   | 1.3   |
| 1140 | 020c10 | AV620925 | LCO28f07  | KIAA0544 protein                                 | <i>Homo sapiens</i>               | 32.3  | 20.3  | 27.4  | 0.6 | 0.1 | 0.8   | 0.2   |
| 1141 | 024g07 | AV626817 | LCL015h10 | KIAA0562 protein                                 | <i>Homo sapiens</i>               | 12.7  | 11.1  | 11.3  | 0.9 | 0.2 | 1.0   | 0.3   |
| 1142 | 104f12 | AV396006 | CL53a08   | KIAA0741 protein                                 | <i>Homo sapiens</i>               | 9.4   | 6.3   | 5.9   | 0.7 | 0.1 | 1.1   | 0.5   |
| 1143 | 146a04 | AV626945 | LCL018e10 | KIAA0780 protein                                 | <i>Homo sapiens</i>               | 13.1  | 12.4  | 8.8   | 0.9 | 0.1 | 1.4   | 0.2   |
| 1144 | 025b03 | AV627119 | LCL021d05 | KIAA0788 protein                                 | <i>Homo sapiens</i>               | 20.8  | 14.2  | 16.4  | 0.7 | 0.2 | 0.9   | 0.0   |
| 1145 | 036g09 | BP098709 | MXL097g03 | KIAA0944 protein                                 | <i>Homo sapiens</i>               | 5.8   | 14.2  | 9.9   | 2.5 | 0.3 | 1.4   | 0.1   |
| 1146 | 125g03 | AV640776 | HCL022c04 | KIAA0944 protein                                 | <i>Homo sapiens</i>               | 5.4   | 5.7   | 5.8   | 1.1 | 0.2 | 1.0   | 0.2   |
| 1147 | 162g01 | BP093891 | MXL015c01 | KIAA0944 protein                                 | <i>Homo sapiens</i>               | 9.1   | 7.0   | 11.5  | 0.8 | 0.3 | 1.0   | 0.8   |
| 1148 | 034a12 | BP095257 | MXL038h11 | KIAA0944 protein                                 | <i>Homo sapiens</i>               | 7.9   | 6.3   | 8.2   | 0.8 | 0.1 | 0.9   | 0.5   |
|      |        |          |           |                                                  |                                   |       |       |       |     |     |       |       |

|      | A      | B        | C         | D                                                                          | E                                    | F      | G      | H      | I    | J    | K   | L   |
|------|--------|----------|-----------|----------------------------------------------------------------------------|--------------------------------------|--------|--------|--------|------|------|-----|-----|
| 1175 | 029a05 | AV630491 | LCL079f12 | Latex-abundant protein                                                     | <i>Hevea brasiliensis</i>            | 85.4   | 53.0   | 74.0   | 0.6  | 0.1  | 0.8 | 0.6 |
| 1176 | 015h06 | AV641519 | HCL035c03 | LD23830                                                                    | <i>Drosophila melanogaster</i>       | 11.9   | 8.0    | 9.0    | 0.7  | 0.1  | 0.9 | 0.3 |
| 1177 | 109g06 | AV388417 | CM029f02  | Learning/memoryprocess protein                                             | <i>Drosophila melanogaster</i>       | 8.5    | 9.0    | 7.6    | 1.1  | 0.1  | 1.2 | 0.3 |
| 1178 | 023f05 | AV625298 | LC090f03  | LEDI-3 protein                                                             | <i>Lithospermum erythrorhizon</i>    | 26.8   | 23.2   | 30.4   | 0.9  | 0.2  | 0.8 | 0.3 |
| 1179 | 154c07 | AV630884 | LCL085f12 | LET 858 gene product-like                                                  | <i>Arabidopsis thaliana</i>          | 47.0   | 37.6   | 50.9   | 0.8  | 0.1  | 0.8 | 0.2 |
| 1180 | 005c07 | AV387887 | CM022a05  | Caenotrien-A4 hydrolase                                                    | <i>Caenorhabditis elegans</i>        | 9.7    | 29.5   | 32.5   | 3.2  | 0.8  | 0.9 | 0.3 |
| 1181 | 172b09 | BP098253 | MXL090c01 | Leukotriene A4 hydrolase                                                   | <i>Homo sapiens</i>                  | 8.3    | 12.4   | 8.8    | 1.7  | 0.9  | 1.8 | 1.1 |
| 1182 | 134d02 | AV619205 | LC005b04  | Lhc4 protein, Type 4 protein of light-harvesting complex of photosystem II | <i>Pinus sylvestris</i>              | 186.8  | 82.3   | 175.2  | 0.4  | 0.2  | 0.5 | 0.3 |
| 1183 | 112h10 | AV392547 | CM062d04  | Ligase I                                                                   | <i>Xenopus laevis</i>                | 6.7    | 6.4    | 5.9    | 1.0  | 0.1  | 1.1 | 0.3 |
| 1184 | 020g07 | AV397762 | CL49e02   | Light harvesting chlorophyll a protein                                     | <i>Chlamydomonas reinhardtii</i>     | 810.9  | 357.3  | 908.1  | 0.5  | 0.3  | 0.4 | 0.1 |
| 1185 | 159a05 | BP087722 | MX042c11  | Light harvesting complex a protein                                         | <i>Volvox carteri</i>                | 334.2  | 265.7  | 180.9  | 0.7  | 0.2  | 2.1 | 1.8 |
| 1186 | 159c03 | BP087752 | MX042h07  | Light harvesting complex a protein                                         | <i>Volvox carteri</i>                | 195.8  | 165.1  | 188.8  | 0.8  | 0.4  | 1.1 | 0.9 |
| 1187 | 138b08 | AV622119 | LC045d02  | Light harvesting complex a protein                                         | <i>Volvox carteri f. nagariensis</i> | 265.6  | 151.0  | 161.6  | 0.5  | 0.1  | 1.0 | 0.7 |
| 1188 | 159d07 | BP087783 | MX043e07  | Light harvesting complex a protein                                         | <i>Volvox carteri f. nagariensis</i> | 364.4  | 226.0  | 279.2  | 0.6  | 0.2  | 0.8 | 0.6 |
| 1189 | 005b10 | AV397473 | CM020e01  | Light harvesting complex a protein                                         | <i>Volvox carteri f. nagariensis</i> | 130.1  | 86.5   | 123.2  | 0.6  | 0.2  | 0.7 | 0.3 |
| 1190 | 143f05 | AV625842 | LC098g03  | Light harvesting complex a protein                                         | <i>Volvox carteri f. nagariensis</i> | 278.7  | 146.4  | 233.8  | 0.5  | 0.0  | 0.7 | 0.4 |
| 1191 | 008b06 | AV392956 | CM066c02  | Light harvesting complex a protein                                         | <i>Volvox carteri f. nagariensis</i> | 182.8  | 116.7  | 191.8  | 0.6  | 0.1  | 0.6 | 0.3 |
| 1192 | 004d09 | AV386738 | CM008c12  | Light harvesting complex a protein                                         | <i>Volvox carteri f. nagariensis</i> | 93.8   | 68.0   | 110.4  | 0.7  | 0.0  | 0.6 | 0.1 |
| 1193 | 009f04 | AV392107 | CM094f03  | Light harvesting complex a protein                                         | <i>Volvox carteri</i>                | 101.6  | 40.3   | 97.0   | 0.4  | 0.3  | 0.4 | 0.2 |
| 1194 | 090c02 | AV390067 | CM086f06  | Light harvesting complex a protein                                         | <i>Volvox carteri f. nagariensis</i> | 119.9  | 106.7  | 128.5  | 0.9  | 0.3  | 0.9 | 0.3 |
| 1195 | 109f04 | AV387987 | CM028b05  | Light harvesting complex A protein precursor                               | <i>Volvox carteri</i>                | 83.9   | 42.5   | 58.5   | 0.5  | 0.3  | 0.7 | 0.4 |
| 1196 | 158c08 | BP087597 | MX038d08  | Light harvesting complex A protein precursor                               | <i>Volvox carteri</i>                | 59.7   | 31.2   | 47.2   | 0.4  | 0.3  | 0.6 | 0.5 |
| 1197 | 019d06 | AV619729 | LC014a01  | Light harvesting complex I chlorophyll binding protein                     | <i>Pyrobrotus stellata</i>           | 302.6  | 171.3  | 258.9  | 0.5  | 0.1  | 0.7 | 0.3 |
| 1198 | 112e02 | AV391919 | CM057d07  | Light harvesting complex I protein precursor                               | <i>Chlamydomonas reinhardtii</i>     | 83.1   | 46.1   | 79.0   | 0.6  | 0.0  | 0.6 | 0.3 |
| 1199 | 007e08 | AV391904 | CM057c07  | Light harvesting complex I protein precursor                               | <i>Chlamydomonas reinhardtii</i>     | 151.0  | 74.9   | 201.7  | 0.5  | 0.2  | 0.4 | 0.1 |
| 1200 | 107f04 | AV386893 | CM011b05  | Light harvesting complex II protein precursor                              | <i>Chlamydomonas reinhardtii</i>     | 791.7  | 417.1  | 565.1  | 0.5  | 0.1  | 0.8 | 0.3 |
| 1201 | 006a12 | AV389096 | CM034h09  | Light harvesting complex II protein precursor                              | <i>Chlamydomonas reinhardtii</i>     | 698.9  | 307.2  | 542.1  | 0.4  | 0.1  | 0.6 | 0.2 |
| 1202 | 107f06 | AV386930 | CM011c06  | Light harvesting complex II protein precursor                              | <i>Chlamydomonas reinhardtii</i>     | 833.0  | 311.8  | 592.9  | 0.4  | 0.2  | 0.5 | 0.1 |
| 1203 | 159c07 | BP087761 | MX043b02  | Light harvesting complex II protein precursor (Lhcb2)                      | <i>Chlamydomonas reinhardtii</i>     | 1394.5 | 876.6  | 1011.3 | 0.6  | 0.4  | 1.0 | 0.9 |
| 1204 | 032a05 | BP087685 | MX041d04  | Light harvesting complex II protein precursor (Lhcb2)                      | <i>Chlamydomonas reinhardtii</i>     | 2228.7 | 966.1  | 1601.3 | 0.4  | 0.2  | 0.6 | 0.4 |
| 1205 | 142f10 | AV625367 | LC091e10  | Light harvesting complex II protein precursor (Lhcb2)                      | <i>Chlamydomonas reinhardtii</i>     | 1725.5 | 745.5  | 1375.3 | 0.4  | 0.3  | 0.6 | 0.6 |
| 1206 | 120f09 | AV636296 | HC057f05  | Light harvesting complex II protein precursor (Lhcb2)                      | <i>Chlamydomonas reinhardtii</i>     | 150.6  | 76.4   | 140.4  | 0.5  | 0.1  | 0.5 | 0.1 |
| 1207 | 159d01 | BP087771 | MX043c07  | Light harvesting complex II protein precursor (Lhcb3)                      | <i>Chlamydomonas reinhardtii</i>     | 1461.4 | 758.8  | 1029.6 | 0.5  | 0.2  | 0.7 | 0.4 |
| 1208 | 008g12 | AV389730 | CM076g03  | Light-harvesting chlorophyll-a/b binding protein Lhcb4                     | <i>Arabidopsis thaliana</i>          | 185.8  | 58.7   | 142.3  | 0.3  | 0.1  | 0.4 | 0.1 |
| 1209 | 026b06 | AV628126 | LCL037b07 | Light-harvesting chlorophyll-a/b binding protein Lhcb4                     | <i>Chlamydomonas reinhardtii</i>     | 507.0  | 214.0  | 331.9  | 0.4  | 0.2  | 0.8 | 0.6 |
| 1210 | 158e06 | BP087658 | MX040e03  | Light-harvesting chlorophyll-a/b binding protein Lhcb1-3                   | <i>Chlamydomonas reinhardtii</i>     | 1688.9 | 1036.7 | 1492.4 | 0.6  | 0.3  | 0.7 | 0.6 |
| 1211 | 162d10 | AV390445 | CM046d05  | Light-harvesting chlorophyll-a/b binding protein Lhcb1-3                   | <i>Chlamydomonas reinhardtii</i>     | 1488.4 | 664.6  | 1104.5 | 0.4  | 0.1  | 0.6 | 0.4 |
| 1212 | 158a02 | BP087340 | MX032c03  | Light-harvesting chlorophyll-a/b binding protein Lhcb1-3                   | <i>Chlamydomonas reinhardtii</i>     | 1311.2 | 846.5  | 870.4  | 0.6  | 0.4  | 1.3 | 1.2 |
| 1213 | 138b06 | AV622111 | LC045c04  | Light-harvesting chlorophyll-a/b binding protein Lhcb1-3                   | <i>Chlamydomonas reinhardtii</i>     | 1106.7 | 538.6  | 701.1  | 0.5  | 0.2  | 0.8 | 0.6 |
| 1214 | 157d04 | BP086856 | MX018f04  | Light-harvesting chlorophyll-a/b binding protein Lhcb1-3                   | <i>Chlamydomonas reinhardtii</i>     | 1491.2 | 868.4  | 1344.4 | 0.6  | 0.2  | 0.7 | 0.4 |
| 1215 | 120b10 | AV635886 | HC052c05  | Light-harvesting chlorophyll-a/b binding protein Lhcb1-3                   | <i>Chlamydomonas reinhardtii</i>     | 999.1  | 492.0  | 822.9  | 0.5  | 0.1  | 0.7 | 0.4 |
| 1216 | 118b01 | AV628818 | LCL047e09 | Light-harvesting chlorophyll-a/b binding protein Lhcb1-3                   | <i>Chlamydomonas reinhardtii</i>     | 410.5  | 331.4  | 566.2  | 0.9  | 0.5  | 0.6 | 0.3 |
| 1217 | 118c10 | AV633677 | HC023h04  | Light-harvesting chlorophyll-a/b binding protein Lhcb1-3                   | <i>Chlamydomonas reinhardtii</i>     | 605.8  | 323.5  | 524.1  | 0.6  | 0.2  | 0.6 | 0.2 |
| 1218 | 118d10 | AV633790 | HC025c06  | Light-harvesting chlorophyll-a/b binding protein Lhcb1-3                   | <i>Chlamydomonas reinhardtii</i>     | 112.6  | 77.4   | 147.4  | 0.7  | 0.3  | 0.5 | 0.2 |
| 1219 | 019c04 | AV619881 | LC013a02  | Light-harvesting chlorophyll-a/b binding protein Lhcb1-3                   | <i>Chlamydomonas reinhardtii</i>     | 1290.1 | 620.3  | 1156.9 | 0.5  | 0.3  | 0.5 | 0.3 |
| 1220 | 160f09 | BP089406 | MX206f08  | Light-harvesting chlorophyll-a/b binding protein Lhcb1-3                   | <i>Chlamydomonas reinhardtii</i>     | 1567.8 | 423.9  | 1319.1 | 0.3  | 0.0  | 0.3 | 0.0 |
| 1221 | 161a05 | BP089468 | MX207h02  | Light-harvesting chlorophyll-a/b binding protein Lhcb1-4                   | <i>Chlamydomonas reinhardtii</i>     | 1424.3 | 865.7  | 692.1  | 0.6  | 0.3  | 1.9 | 1.8 |
| 1222 | 157a01 | BP086446 | MX009a07  | Light-harvesting chlorophyll-a/b binding protein Lhcb1-4                   | <i>Chlamydomonas reinhardtii</i>     | 1256.7 | 969.9  | 843.2  | 0.8  | 0.5  | 1.7 | 1.6 |
| 1223 | 119c08 | AV634846 | HC038g02  | Light-harvesting chlorophyll-a/b binding protein Lhcb1-4                   | <i>Chlamydomonas reinhardtii</i>     | 1215.7 | 551.1  | 912.2  | 0.4  | 0.2  | 0.7 | 0.5 |
| 1224 | 142f10 | AV625361 | LC091e03  | Light-harvesting chlorophyll-a/b binding protein Lhcb1-4                   | <i>Chlamydomonas reinhardtii</i>     | 652.1  | 325.0  | 512.9  | 0.4  | 0.2  | 0.7 | 0.5 |
| 1225 | 108f02 | AV397475 | CM020f05  | Light-harvesting chlorophyll-a/b binding protein Lhcb1-4                   | <i>Chlamydomonas reinhardtii</i>     | 757.6  | 412.4  | 665.2  | 0.5  | 0.2  | 0.7 | 0.4 |
| 1226 | 117b06 | AU301229 | HC006b08  | Light-harvesting chlorophyll-a/b binding protein Lhcb1-4                   | <i>Chlamydomonas reinhardtii</i>     | 922.2  | 403.5  | 660.3  | 0.4  | 0.1  | 0.6 | 0.1 |
| 1227 | 107d02 | AV391983 | CM093g04  | Light-harvesting chlorophyll-a/b binding protein Lhcb1-4                   | <i>Chlamydomonas reinhardtii</i>     | 511.1  | 277.2  | 584.3  | 0.6  | 0.3  | 0.6 | 0.3 |
| 1228 | 013f05 | AV639096 | HC094h11  | Light-harvesting complex II protein                                        | <i>Chlamydomonas reinhardtii</i>     | 535.4  | 270.7  | 535.4  | 0.6  | 0.4  | 0.5 | 0.3 |
| 1229 | 114a12 | AV397229 | CM073b01  | Light-harvesting complex II protein precursor                              | <i>Chlamydomonas reinhardtii</i>     | 607.8  | 360.3  | 549.3  | 0.7  | 0.4  | 0.6 | 0.1 |
| 1230 | 165d11 | AV397229 | CL78e01   | Light-harvesting complex II protein precursor (cab1-2)                     | <i>Chlamydomonas reinhardtii</i>     | 1361.1 | 738.6  | 1219.3 | 0.5  | 0.2  | 0.6 | 0.4 |
| 1231 | 030g01 | BP086118 | MX002c04  | LiI3 protein                                                               | <i>Arabidopsis thaliana</i>          | 115.8  | 31.2   | 62.3   | 0.2  | 0.1  | 0.6 | 0.5 |
| 1232 | 019c02 | AV619723 | LC012c04  | LiI3 protein                                                               | <i>Arabidopsis thaliana</i>          | 57.3   | 20.7   | 37.5   | 0.5  | 0.5  | 0.5 | 0.4 |
| 1233 | 126f09 | AV641386 | HCL032f12 | Lipoxygenase                                                               | <i>Glycine max</i>                   | 19.0   | 11.0   | 10.4   | 0.7  | 0.3  | 1.1 | 0.2 |
| 1234 | 017g10 | AV643732 | HCL075a05 | Lis1 homolog                                                               | <i>Drosophila melanogaster</i>       | 0.9    | 1.1    | 1.3    | 1.4  | 1.1  | 1.2 | 1.3 |
| 1235 | 156c06 | AV631795 | LCL100a02 | Lis1 homolog                                                               | <i>Drosophila melanogaster</i>       | 28.1   | 28.8   | 40.9   | 1.0  | 0.2  | 0.7 | 0.2 |
| 1236 | 140a01 | AV623521 | LC065b01  | L11T chain of axonemal inner dynein arm, p28                               | <i>Chlamydomonas reinhardtii</i>     | 32.8   | 34.0   | 20.6   | 1.0  | 0.1  | 1.7 | 0.9 |
| 1237 | 153b08 | AV630361 | LCL077g10 | LLS1                                                                       | <i>Zea mays</i>                      | 10.3   | 9.2    | 8.1    | 1.0  | 0.2  | 1.3 | 0.6 |
| 1238 | 020f09 | AV621323 | LC034d04  | Low-carbon dioxide inducible protein (Lci3)                                | <i>Chlamydomonas reinhardtii</i>     | 94.8   | 117.1  | 74.1   | 1.6  | 0.7  | 1.7 | 0.9 |
| 1239 | 032a10 | BP087723 | MX042c12  | Low-carbon dioxide inducible protein (Lci3)                                | <i>Chlamydomonas reinhardtii</i>     | 119.9  | 143.0  | 92.8   | 1.5  | 0.7  | 1.6 | 0.6 |
| 1240 | 137c06 | AV621398 | LC035e05  | Low-CO <sub>2</sub> inducible membrane protein, Lci1                       | <i>Chlamydomonas reinhardtii</i>     | 3.8    | 305.9  | 110.6  | 82.2 | 32.0 | 2.7 | 0.4 |
| 1241 | 019d11 | AV619824 | LC015b02  | Low-CO <sub>2</sub> inducible membrane protein, Lci1                       | <i>Chlamydomonas reinhardtii</i>     | 3.9    | 287.2  | 133.3  | 76.3 | 10.3 | 2.1 | 0.9 |
| 1242 | 112b03 | AV391468 | CM054g08  | Low-CO <sub>2</sub> inducible membrane protein, Lci1                       | <i>Chlamydomonas reinhardtii</i>     | 22.6   | 233.9  | 81.3   | 11.4 | 7.1  | 2.9 | 1.4 |
| 1243 | 011e02 | AV634930 | HC039g08  | Low-CO <sub>2</sub> inducible protein, Lci5                                | <i>Chlamydomonas reinhardtii</i>     | 85.0   | 293.5  | 287.8  | 3.4  | 1.0  | 1.1 | 0.5 |
| 1244 | 122f03 | AV638583 | HC088b12  | Low-CO <sub>2</sub> inducible protein, Lci5                                | <i>Chlamydomonas reinhardtii</i>     | 68.6   | 211.2  | 216.2  | 3.3  | 1.2  | 1.0 | 0.1 |
| 1245 | 023e06 | AV625166 | LC088g04  | Low-CO <sub>2</sub> inducible protein, Lci6                                | <i>Chlamydomonas reinhardtii</i>     | 16.9   | 33.1   | 6.7    | 2.0  | 0.2  | 5.0 | 0.6 |
| 1246 | 019d04 | AV619888 | LC013g09  | Low-CO <sub>2</sub> inducible protein, LciA                                | <i>Chlamydomonas reinhardtii</i>     | 5.9    | 224.8  | 147.9  | 46.5 | 23.4 | 1.5 | 0.1 |
| 1247 | 031h05 | BP087443 | MX034f10  | Low-CO <sub>2</sub> inducible protein, LciA                                | <i>Chlamydomonas reinhardtii</i>     | 3.5    | 205.2  | 144.1  | 62.2 | 17.9 | 1.5 | 0.2 |
| 1248 | 018h08 | AV619223 | LC005d03  | Low-CO <sub>2</sub> inducible protein, LciA                                | <i>Chlamydomonas reinhardtii</i>     | 2.2    | 130.5  | 101.9  | 60.7 | 10.6 | 1.3 | 0.4 |
| 1249 | 108g10 | AV621495 | LC036h07  | Low-CO <sub>2</sub> inducible protein, LciA                                | <i>Chlamydomonas reinhardtii</i>     | 124.4  | 79.5   | 68.9   | 0.6  | 0.1  | 1.2 | 0.4 |
| 1250 | 012g07 | AV637344 | HC071h08  | Low-CO <sub>2</sub> inducible protein, LciB                                | <i>Chlamydomonas reinhardtii</i>     | 7.4    | 185.0  | 201.9  | 24.3 | 7.1  | 0.9 | 0.2 |
| 1251 | 019b06 | AV619626 | LC010h12  | Low-CO <sub>2</sub> inducible protein, LciB                                | <i>Chlamydomonas reinhardtii</i>     | 590.4  | 437.5  | 517.6  | 0.7  | 0.0  | 0.8 | 0.1 |
| 1252 | 028e01 | AV630016 | LCL0      |                                                                            |                                      |        |        |        |      |      |     |     |



|      | A      | B        | C         | D                                                               | E                                           | F     | G     | H     | I     | J    | K   | L   |
|------|--------|----------|-----------|-----------------------------------------------------------------|---------------------------------------------|-------|-------|-------|-------|------|-----|-----|
| 1282 | 014d09 | AV640044 | HCL009c11 | Malate synthase                                                 | <i>Emericella nidulans</i>                  | 71.0  | 67.7  | 61.2  | 1.0   | 0.1  | 1.1 | 0.4 |
| 1283 | 009a01 | AV389927 | CM080h12  | Male germ cell-associated kinase (Mak)                          | <i>Rattus norvegicus</i>                    | 12.6  | 19.3  | 14.8  | 1.7   | 0.4  | 1.3 | 0.3 |
| 1284 | 033c09 | BP094286 | MXL020e12 | Malic enzyme 3, NADP(+)-dependent, mitochondrial                | <i>Homo sapiens</i>                         | 14.4  | 13.0  | 15.0  | 0.9   | 0.1  | 0.9 | 0.3 |
| 1285 | 122d01 | AV638156 | HC082f07  | Malonyl CoA decarboxylase                                       | <i>Anser anser</i>                          | 5.7   | 6.3   | 4.3   | 1.3   | 1.0  | 1.4 | 0.5 |
| 1286 | 157b09 | BP086661 | MX013h03  | Mammary tumor integration site 6 oncogene protein               | <i>Mus musculus</i>                         | 28.0  | 23.0  | 16.8  | 0.9   | 0.4  | 1.7 | 1.1 |
| 1287 | 018h12 | AV619328 | LC006g02  | MAP kinase 5                                                    | <i>Zea mays</i>                             | 3.8   | 3.7   | 4.2   | 1.1   | 0.5  | 0.9 | 0.5 |
| 1288 | 014h01 | AV640473 | HCL016h11 | MAP kinase-like protein                                         | <i>Trypanosoma brucei</i>                   | 4.9   | 6.9   | 4.2   | 1.7   | 0.8  | 1.7 | 0.1 |
| 1289 | 023g05 | AV626067 | LCL001h07 | MAP3K delta-1 protein kinase                                    | <i>Arabidopsis thaliana</i>                 | 4.6   | 4.4   | 4.8   | 1.0   | 0.2  | 1.0 | 0.3 |
| 1290 | 016g06 | AV642530 | HCL053d11 | MAP3K delta-1 protein kinase                                    | <i>Arabidopsis thaliana</i>                 | 5.4   | 5.2   | 6.1   | 1.0   | 0.2  | 0.8 | 0.2 |
| 1291 | 155c12 | AV631386 | LCL093a08 | MCM2-related protein                                            | <i>Arabidopsis thaliana</i>                 | 14.5  | 18.3  | 11.0  | 1.9   | 1.3  | 3.3 | 2.7 |
| 1292 | 108f10 | AV387908 | CM021c05  | MDG1                                                            | <i>Homo sapiens</i>                         | 10.9  | 8.9   | 11.4  | 0.8   | 0.1  | 0.8 | 0.3 |
| 1293 | 127g04 | AV641987 | HCL043e04 | Medium-chain fatty acid-CoA ligase                              |                                             | 56.3  | 42.8  | 71.2  | 0.8   | 0.1  | 0.7 | 0.3 |
| 1294 | 106h11 | AV386655 | CM004d09  | Meichroacidin                                                   | <i>Mus musculus</i>                         | 88.3  | 68.7  | 93.7  | 0.8   | 0.0  | 0.8 | 0.1 |
| 1295 | 125a07 | AV640401 | HCL015f06 | Membrane atpase                                                 | <i>Schizosaccharomyces pombe</i>            | 7.6   | 9.1   | 7.0   | 1.3   | 0.5  | 1.3 | 0.2 |
| 1296 | 024e05 | AV626629 | LCL012e11 | Membrane protein                                                | <i>Agrobacterium vitis</i>                  | 2.2   | 1.8   | 1.5   | 0.9   | 0.4  | 1.2 | 0.3 |
| 1297 | 004f03 | AV386884 | CM011e01  | Membrane protein TMS1d-like protein                             | <i>Arabidopsis thaliana</i>                 | 7.6   | 6.6   | 5.8   | 1.1   | 0.5  | 1.1 | 0.3 |
| 1298 | 024g11 | AV626861 | LCL016h03 | Membrane protein TMS1d-like protein                             | <i>Arabidopsis thaliana</i>                 | 12.1  | 14.2  | 14.0  | 1.2   | 0.1  | 1.0 | 0.2 |
| 1299 | 029e04 | AV630903 | LCL086a09 | Membrane-associated 30 kDa protein, chloroplast precursor (M30) | <i>Pisum sativum</i>                        | 37.2  | 53.9  | 61.3  | 1.5   | 0.7  | 0.9 | 0.3 |
| 1300 | 12d203 | AV636627 | HC062a07  | MES (213aa) (638 is 2nd base in codon)                          | <i>Mus musculus</i>                         | 5.7   | 11.1  | 10.9  | 2.0   | 0.3  | 1.0 | 0.4 |
| 1301 | 012a05 | AV629852 | LCL067f07 | Mep-diaminopimelate-adding enzyme                               | <i>Escherichia coli</i>                     | 4.5   | 3.7   | 3.5   | 0.8   | 0.1  | 1.1 | 0.4 |
| 1302 | 006b01 | AV389100 | CM034h10  | Methionine synthase, cobalamin-independent                      | <i>Chlamydomonas reinhardtii</i>            | 141.1 | 78.6  | 73.4  | 0.6   | 0.2  | 1.1 | 0.2 |
| 1303 | 002b05 | AV395046 | CL31e05   | Methionine synthase, cobalamin-independent                      | <i>Chlamydomonas reinhardtii</i>            | 133.7 | 52.6  | 51.0  | 0.4   | 0.0  | 1.1 | 0.1 |
| 1304 | 139c10 | BP098789 | MXL099b11 | Methionine synthase, cobalamin-independent                      | <i>Chlamydomonas reinhardtii</i>            | 183.7 | 84.8  | 88.6  | 0.5   | 0.1  | 1.0 | 0.4 |
| 1305 | 033h07 | BP095078 | MXL035d09 | Methionine synthase, cobalamin-independent                      | <i>Chlamydomonas reinhardtii</i>            | 181.2 | 73.4  | 79.1  | 0.4   | 0.0  | 1.0 | 0.4 |
| 1306 | 026b08 | AV628139 | LCL037c12 | Methionine-tRNA synthetase                                      | <i>Homo sapiens</i>                         | 18.7  | 11.7  | 17.0  | 0.6   | 0.2  | 0.8 | 0.4 |
| 1307 | 145c01 | AV626564 | LCL011d09 | Methyl-accepting chemotaxis protein (MCP) homologue             | <i>Pseudomonas aeruginosa</i>               | 10.5  | 6.5   | 7.4   | 0.7   | 0.3  | 1.0 | 0.5 |
| 1308 | 109h11 | AV388697 | CM031d10  | Methylated-DNA-protein-cysteine S-methyltransferase             | <i>Methanobacterium thermoautotrophicum</i> | 113.2 | 83.2  | 95.4  | 0.7   | 0.1  | 0.9 | 0.1 |
| 1309 | 154c01 | AV630860 | LCL085c12 | Methylmalonate semi-aldehyde dehydrogenase                      | <i>Oryza sativa</i>                         | 19.8  | 26.4  | 24.5  | 1.3   | 0.1  | 1.2 | 0.4 |
| 1310 | 130a03 | AV643160 | HCL064h02 | Methylmalonate semi-aldehyde dehydrogenase                      | <i>Oryza sativa</i>                         | 12.6  | 16.5  | 17.5  | 1.3   | 0.2  | 1.0 | 0.2 |
| 1311 | 013e11 | AV638892 | HC092b09  | Methylmalonate semi-aldehyde dehydrogenase                      | <i>Oryza sativa</i>                         | 10.0  | 12.7  | 15.5  | 1.3   | 0.6  | 0.8 | 0.3 |
| 1312 | 102d09 | AV394213 | CL22c04   | Mg chelatase subunit                                            | <i>Nicotiana tabacum</i>                    | 15.8  | 7.7   | 13.8  | 0.5   | 0.2  | 0.6 | 0.2 |
| 1313 | 123h06 | AV639849 | HCL006b02 | Mg-protoporphyrin IX                                            | <i>Hordeum vulgare</i>                      | 21.5  | 20.4  | 16.9  | 0.9   | 0.5  | 1.3 | 0.9 |
| 1314 | 036a02 | BP097601 | MXL078c10 | Microsomal glutathione S-transferase 3                          | <i>Oryza sativa</i>                         | 28.2  | 20.3  | 20.8  | 0.7   | 0.2  | 1.0 | 0.2 |
| 1315 | 036a01 | BP097598 | MXL078c07 | MigA                                                            | <i>Dictyostelium discoideum</i>             | 61.1  | 36.7  | 66.1  | 0.6   | 0.1  | 0.8 | 0.5 |
| 1316 | 164h03 | BP094965 | MXL039e03 | Mismatch binding protein Mus3                                   | <i>Zea mays</i>                             | 30.8  | 23.9  | 32.8  | 0.8   | 0.2  | 0.8 | 0.4 |
| 1317 | 151c11 | AV629419 | LCL058d11 | Mitochondrial carrier protein                                   | <i>Schizosaccharomyces pombe</i>            | 7.8   | 34.5  | 33.4  | 4.4   | 1.3  | 1.1 | 0.6 |
| 1318 | 161a07 | BP089491 | MX208d03  | Mitochondrial apocytochrome c (cyc)                             | <i>Chlamydomonas reinhardtii</i>            | 83.6  | 104.0 | 46.8  | 1.2   | 0.4  | 3.6 | 3.1 |
| 1319 | 159b08 | BP087745 | MX042g06  | Mitochondrial carbonic anhydrase, Mca                           | <i>Chlamydomonas reinhardtii</i>            | 4.2   | 760.6 | 286.9 | 186.6 | 31.9 | 3.6 | 1.7 |
| 1320 | 135h02 | AV620271 | LC019h06  | Mitochondrial carbonic anhydrase, Mca                           | <i>Chlamydomonas reinhardtii</i>            | 15.7  | 836.4 | 278.6 | 56.3  | 26.9 | 2.9 | 0.6 |
| 1321 | 140g01 | AU301243 | LC072b01  | Mitochondrial carbonic anhydrase, Mca                           | <i>Chlamydomonas reinhardtii</i>            | 6.3   | 790.6 | 356.7 | 127.1 | 46.2 | 2.7 | 1.0 |
| 1322 | 137e03 | AU301239 | LC038g09  | Mitochondrial carbonic anhydrase, Mca                           | <i>Chlamydomonas reinhardtii</i>            | 4.9   | 718.6 | 266.6 | 157.5 | 83.3 | 2.7 | 0.2 |
| 1323 | 142a02 | AU301245 | LC083a02  | Mitochondrial carbonic anhydrase, Mca                           | <i>Chlamydomonas reinhardtii</i>            | 5.8   | 692.4 | 285.7 | 125.2 | 56.2 | 2.5 | 0.3 |
| 1324 | 143d04 | AV625688 | LC096e02  | Mitochondrial carbonic anhydrase, Mca                           | <i>Chlamydomonas reinhardtii</i>            | 7.9   | 796.4 | 347.2 | 100.2 | 24.2 | 2.5 | 0.5 |
| 1325 | 141c05 | AV624371 | LC076g12  | Mitochondrial carbonic anhydrase, Mca                           | <i>Chlamydomonas reinhardtii</i>            | 8.7   | 721.5 | 335.0 | 97.3  | 59.0 | 2.4 | 0.6 |
| 1326 | 136f02 | AU301238 | LC026f10  | Mitochondrial carbonic anhydrase, Mca                           | <i>Chlamydomonas reinhardtii</i>            | 5.0   | 758.3 | 336.9 | 145.0 | 39.7 | 2.3 | 0.2 |
| 1327 | 028b01 | AV631799 | LCL100a08 | Mitochondrial carbonic anhydrase, Mca                           | <i>Chlamydomonas reinhardtii</i>            | 5.9   | 886.8 | 376.6 | 147.9 | 35.2 | 2.3 | 0.2 |
| 1328 | 147e03 | AV627559 | LCL028e06 | Mitochondrial carbonic anhydrase, Mca                           | <i>Chlamydomonas reinhardtii</i>            | 9.3   | 767.4 | 345.5 | 81.5  | 27.6 | 2.3 | 0.2 |
| 1329 | 142b08 | AV388778 | LC085c06  | Mitochondrial carbonic anhydrase, Mca                           | <i>Chlamydomonas reinhardtii</i>            | 86.4  | 871.7 | 426.7 | 9.9   | 2.0  | 2.3 | 0.5 |
| 1330 | 005b02 | AV623094 | LC058h01  | Mitochondrial carbonic anhydrase, Mca                           | <i>Chlamydomonas reinhardtii</i>            | 4.7   | 542.6 | 244.5 | 113.1 | 18.5 | 2.2 | 0.1 |
| 1331 | 137e08 | AV621674 | LC039e05  | Mitochondrial carbonic anhydrase, Mca                           | <i>Chlamydomonas reinhardtii</i>            | 4.0   | 679.2 | 339.0 | 173.4 | 76.9 | 2.2 | 0.6 |
| 1332 | 136c12 | AV388778 | LC024g11  | Mitochondrial carbonic anhydrase, Mca                           | <i>Chlamydomonas reinhardtii</i>            | 9.8   | 585.4 | 254.1 | 63.2  | 40.2 | 2.2 | 0.2 |
| 1333 | 116f06 | AV392849 | CM100f05  | Mitochondrial carbonic anhydrase, Mca                           | <i>Chlamydomonas reinhardtii</i>            | 4.0   | 435.7 | 185.4 | 103.7 | 32.5 | 2.2 | 0.5 |
| 1334 | 111e09 | AV390875 | CM048e12  | Mitochondrial carbonic anhydrase, Mca                           | <i>Chlamydomonas reinhardtii</i>            | 12.5  | 508.5 | 218.8 | 40.8  | 23.1 | 2.2 | 1.0 |
| 1335 | 027f12 | AV629356 | LCL057c09 | Mitochondrial carbonic anhydrase, Mca                           | <i>Chlamydomonas reinhardtii</i>            | 4.5   | 658.4 | 353.6 | 143.7 | 36.0 | 2.1 | 0.6 |
| 1336 | 142e12 | AV388778 | LC090b05  | Mitochondrial carbonic anhydrase, Mca                           | <i>Chlamydomonas reinhardtii</i>            | 5.0   | 531.1 | 254.6 | 106.1 | 37.5 | 2.1 | 0.2 |
| 1337 | 019f02 | AV622476 | LC050c02  | Mitochondrial carbonic anhydrase, Mca                           | <i>Chlamydomonas reinhardtii</i>            | 4.1   | 326.7 | 157.2 | 82.6  | 20.0 | 2.1 | 0.0 |
| 1338 | 143e05 | AU301247 | LC087f02  | Mitochondrial carbonic anhydrase, Mca                           | <i>Chlamydomonas reinhardtii</i>            | 6.4   | 816.9 | 440.9 | 128.1 | 38.3 | 2.0 | 0.3 |
| 1339 | 137f11 | AV621790 | LC041a03  | Mitochondrial carbonic anhydrase, Mca                           | <i>Chlamydomonas reinhardtii</i>            | 7.7   | 501.6 | 264.5 | 86.3  | 62.2 | 2.0 | 0.3 |
| 1340 | 143e11 | AV625799 | LC098a03  | Mitochondrial carbonic anhydrase, Mca                           | <i>Chlamydomonas reinhardtii</i>            | 8.5   | 785.9 | 424.5 | 92.2  | 5.5  | 2.0 | 0.3 |
| 1341 | 021c07 | AV388570 | CM030b11  | Mitochondrial carbonic anhydrase, Mca                           | <i>Chlamydomonas reinhardtii</i>            | 5.7   | 703.0 | 380.7 | 121.0 | 21.7 | 2.0 | 0.3 |
| 1342 | 021h09 | AV622685 | LC053a06  | Mitochondrial carbonic anhydrase, Mca                           | <i>Chlamydomonas reinhardtii</i>            | 6.0   | 837.4 | 462.5 | 137.9 | 25.2 | 2.0 | 0.3 |
| 1343 | 019c08 | AV631543 | LCL095h11 | Mitochondrial carbonic anhydrase, Mca                           | <i>Chlamydomonas reinhardtii</i>            | 3.5   | 423.9 | 231.9 | 122.3 | 42.0 | 1.9 | 0.3 |
| 1344 | 142f11 | AV388778 | CM032c10  | Mitochondrial carbonic anhydrase, Mca                           | <i>Chlamydomonas reinhardtii</i>            | 6.1   | 790.2 | 426.9 | 127.0 | 33.8 | 1.9 | 0.2 |
| 1345 | 019c07 | AV628028 | LCL035f09 | Mitochondrial carbonic anhydrase, Mca                           | <i>Chlamydomonas reinhardtii</i>            | 6.5   | 633.2 | 324.4 | 99.5  | 50.6 | 1.9 | 0.4 |
| 1346 | 121b06 | AV630094 | LCL073a07 | Mitochondrial carbonic anhydrase, Mca                           | <i>Chlamydomonas reinhardtii</i>            | 9.4   | 937.7 | 519.1 | 97.8  | 46.2 | 1.8 | 0.1 |
| 1347 | 144f08 | AV631825 | LCL100d09 | Mitochondrial carbonic anhydrase, Mca                           | <i>Chlamydomonas reinhardtii</i>            | 27.7  | 411.3 | 253.9 | 15.8  | 7.5  | 1.8 | 0.4 |
| 1348 | 018g08 | AV619094 | LC003f11  | Mitochondrial carbonic anhydrase, Mca                           | <i>Chlamydomonas reinhardtii</i>            | 43.1  | 84.0  | 65.5  | 2.1   | 1.0  | 1.3 | 0.4 |
| 1349 | 170b05 | BP097274 | MXL072h02 | Mitochondrial carrier protein                                   | <i>Schizosaccharomyces pombe</i>            | 7.9   | 6.3   | 5.3   | 0.8   | 0.1  | 1.4 | 0.7 |
| 1350 | 119e06 | BP383700 | HC042c05  | Mitochondrial carrier protein                                   | <i>Ribes nigrum</i>                         | 17.5  | 16.1  | 17.6  | 0.9   | 0.1  | 0.9 | 0.2 |
| 1351 | 033d03 | BP094345 | MXL021e11 | Mitochondrial phosphate transporter                             | <i>Arabidopsis thaliana</i>                 | 41.9  | 18.9  | 24.1  | 0.5   | 0.1  | 0.8 | 0.1 |
| 1352 | 006b09 | AV389278 | CM036a01  | Mitochondrial phosphate transporter                             | <i>Zea mays</i>                             | 17.2  | 9.5   | 13.5  | 0.6   | 0.0  | 0.7 | 0.1 |
| 1353 | 029b09 | AV631099 | LCL088g04 | Mitochondrial processing peptidase alpha subunit                | <i>Arabidopsis thaliana</i>                 | 47.4  | 38.1  | 33.9  | 0.8   | 0.3  | 1.1 | 0.3 |
| 1354 | 156g11 | BP086356 | MX007b11  | Mitochondrial processing peptidase alpha subunit                | <i>Solanum tuberosum</i>                    | 14.5  | 8.9   | 13.7  | 0.6   | 0.2  | 0.7 | 0.3 |
| 1355 | 030h07 | BP086250 | MX005b02  | Mitochondrial uncoupling protein                                | <i>Arabidopsis thaliana</i>                 | 21.3  | 30.5  | 27.5  | 1.4   | 0.2  | 1.2 | 0.5 |
| 1356 | 027a05 | AV628752 | LCL046f02 | Mitogen activated protein kinase kinase                         | <i>Oryza sativa</i>                         | 8.3   | 5.4   | 6.8   | 0.7   | 0.2  | 1.0 | 0.5 |
| 1357 | 006a09 | AV388972 | CM034a10  | Mitogen-activated protein kinase homolog NTF3                   | <i>Arabidopsis thaliana</i>                 | 15.9  | 19.4  | 19.5  | 1.2   | 0.2  | 1.0 | 0.3 |
| 1358 | 138d04 | AV622228 | LC046h01  | Mitogen-activated protein kinase                                | <i>Chlamydomonas reinhardtii</i>            | 10.8  | 21.5  | 10.9  | 2.0   | 0.8  | 2.0 | 0.2 |
| 1359 | 009e07 | AV392992 | CM039d12  | Mn superoxide dismutase                                         | <i>Chlamydomonas reinhardtii</i>            | 27.4  | 29.5  | 36.7  | 1.1   | 0.2  | 0.8 | 0.1 |
| 1360 | 007b05 | AV391186 | CM051d09  | MINTH, ANASP Probable manganese transport protein mintH         | <i>Nostoc sp. PCC 7120</i>                  | 4.5   | 4.2   | 4.0   | 1.0   | 0.2  | 1.0 | 0.2 |
| 1361 | 136d10 | AV620708 | LC025g07  | ModA                                                            | <i>Dictyostelium discoideum</i>             |       |       |       |       |      |     |     |



|      | A      | B        | C         | D                                                        | E                                  | F      | G      | H      | I   | J   | K   | L   |
|------|--------|----------|-----------|----------------------------------------------------------|------------------------------------|--------|--------|--------|-----|-----|-----|-----|
| 1389 | 004h11 | AV387459 | CM016e08  | NADH dehydrogenase (ubiquinone), subunit 7               | <i>Prototheca wickerhamii</i>      | 47.4   | 52.6   | 43.5   | 1.1 | 0.1 | 3.0 | 3.3 |
| 1390 | 020d08 | AV621018 | LC030a06  | NADH dehydrogenase (ubiquinone), subunit 9               | <i>Prototheca wickerhamii</i>      | 23.5   | 17.3   | 20.7   | 0.7 | 0.1 | 0.9 | 0.3 |
| 1391 | 170b12 | BP097305 | MXL073d05 | NADH dehydrogenase like protein                          | <i>Arabidopsis thaliana</i>        | 20.7   | 58.3   | 39.9   | 2.8 | 0.2 | 2.3 | 1.4 |
| 1392 | 103g02 | AV395359 | CL40h10   | NADH dehydrogenase like protein                          | <i>Arabidopsis thaliana</i>        | 10.3   | 20.2   | 19.7   | 2.6 | 2.1 | 1.0 | 0.4 |
| 1393 | 031b11 | BP086637 | MX013c06  | NADH dehydrogenase subunit 7                             | <i>Nephroselmis olivacea</i>       | 27.0   | 25.2   | 28.2   | 0.9 | 0.2 | 1.0 | 0.4 |
| 1394 | 158c12 | BP087630 | MX039f03  | NADH dependent glutamate synthase                        | <i>Oryza sativa</i>                | 12.9   | 14.0   | 7.6    | 1.1 | 0.3 | 2.4 | 1.3 |
| 1395 | 006e11 | AV390144 | CM042f02  | NADH/ubiquinone oxidoreductase                           | <i>Neurospora crassa</i>           | 14.4   | 15.7   | 14.9   | 1.1 | 0.0 | 1.1 | 0.2 |
| 1396 | 103b11 | AV638185 | HC083a04  | NADH:ubiquinone oxidoreductase                           | <i>Arabidopsis thaliana</i>        | 15.3   | 15.6   | 14.7   | 1.0 | 0.1 | 1.1 | 0.3 |
| 1397 | 135d11 | AV619968 | LC015f10  | NADH-ubiquinone oxidoreductase 20 kD subunit             | <i>Solanum tuberosum</i>           | 46.9   | 35.6   | 39.4   | 0.8 | 0.0 | 0.9 | 0.3 |
| 1398 | 011g04 | AV635415 | HC046b01  | NADH-ubiquinone oxidoreductase 24 kD subunit             | <i>Arabidopsis thaliana</i>        | 28.9   | 32.4   | 31.1   | 1.2 | 0.6 | 1.0 | 0.3 |
| 1399 | 120d12 | AV636040 | HC054d07  | NADH-ubiquinone oxidoreductase 39 kD subunit             | <i>Caulobacter crescentus CB15</i> | 20.7   | 25.4   | 20.9   | 1.2 | 0.1 | 1.3 | 0.4 |
| 1400 | 017f10 | AV643592 | HCL072d06 | NADH-ubiquinone oxidoreductase 75 kD subunit             | <i>Solanum tuberosum</i>           | 4.3    | 4.1    | 5.1    | 0.9 | 0.3 | 0.8 | 0.3 |
| 1401 | 032d10 | BP093278 | MXL006a08 | NADH-ubiquinone oxidoreductase B8 subunit                | <i>Arabidopsis thaliana</i>        | 21.0   | 19.1   | 22.0   | 0.9 | 0.1 | 0.9 | 0.2 |
| 1402 | 026g03 | AV628525 | LCL043c07 | NADP-DEPENDENT MALIC ENZYME, CHLOROPLAST PRECURSOR       | <i>Oryza sativa</i>                | 16.7   | 17.0   | 15.2   | 1.1 | 0.3 | 1.4 | 0.8 |
| 1403 | 170a02 | AV386682 | CM004g10  | NADPH:ferrihemoprotein oxidoreductase                    | <i>Eschscholzia californica</i>    | 3.2    | 3.5    | 3.7    | 1.3 | 0.6 | 1.0 | 0.4 |
| 1404 | 029e10 | AV630927 | LCL086d10 | NADPH:protochlorophyllide oxidoreductase                 | <i>Chlamydomonas reinhardtii</i>   | 68.0   | 18.1   | 34.6   | 0.3 | 0.1 | 0.5 | 0.3 |
| 1405 | 137g07 | AV621869 | LC042a03  | NADPH:protochlorophyllide oxidoreductase                 | <i>Chlamydomonas reinhardtii</i>   | 56.1   | 13.3   | 25.7   | 0.2 | 0.1 | 0.5 | 0.3 |
| 1406 | 120g05 | AV636400 | HC059a04  | NADPH:protochlorophyllide oxidoreductase                 | <i>Chlamydomonas reinhardtii</i>   | 29.3   | 8.2    | 20.1   | 0.3 | 0.1 | 0.4 | 0.2 |
| 1407 | 148c05 | AV627926 | LCL034a03 | NADP-malate dehydrogenase                                | <i>Chlamydomonas reinhardtii</i>   | 44.1   | 99.6   | 89.4   | 2.3 | 0.1 | 1.2 | 0.4 |
| 1408 | 015e06 | AV641145 | HCL028e07 | NADP-malate dehydrogenase                                | <i>Chlamydomonas reinhardtii</i>   | 25.7   | 63.4   | 57.2   | 2.6 | 0.5 | 1.1 | 0.1 |
| 1409 | 034b01 | BP095261 | MXL039a08 | NADP-reducing hydrogenase, subunit D, putative           | <i>Thermotoga maritima</i>         | 11.6   | 15.7   | 7.9    | 1.5 | 0.6 | 2.1 | 0.6 |
| 1410 | 009g02 | AV392441 | CM097c07  | NADP-reducing hydrogenase, subunit D, putative           | <i>Thermotoga maritima</i>         | 13.1   | 19.5   | 9.5    | 1.6 | 0.5 | 2.1 | 0.2 |
| 1411 | 010g10 | AV633583 | HC022f01  | NAP1Ps                                                   | <i>Pisum sativum</i>               | 19.6   | 13.3   | 14.4   | 0.7 | 0.2 | 0.9 | 0.3 |
| 1412 | 116h08 | AV631999 | HC002h12  | nCpP5                                                    | <i>Arabidopsis thaliana</i>        | 13.0   | 9.4    | 9.8    | 0.7 | 0.1 | 1.0 | 0.3 |
| 1413 | 158d12 | BP087652 | MX040c12  | Negative regulator of cdc42p                             | <i>Schizosaccharomyces pombe</i>   | 14.9   | 10.3   | 11.4   | 0.7 | 0.2 | 0.9 | 0.3 |
| 1414 | 011h08 | AV635286 | HC044d05  | Negative regulator of cdc42p                             | <i>Schizosaccharomyces pombe</i>   | 15.2   | 8.1    | 11.1   | 0.5 | 0.1 | 0.7 | 0.0 |
| 1415 | 110c07 | AV389104 | CM035a08  | N-ethylmaleimide chlorohydrolyase                        | <i>Archaeoglobus fulgidus</i>      | 15.2   | 15.6   | 15.7   | 1.0 | 0.0 | 1.0 | 0.2 |
| 1416 | 156a05 | AV631675 | LCL098a07 | NGD3 gene product                                        | <i>Murinae gen. sp.</i>            | 29.8   | 44.7   | 22.5   | 1.5 | 0.4 | 2.8 | 2.0 |
| 1417 | 004f02 | AV386916 | CM011c12  | N-hydroxy-N-isopropylloxamate                            | <i>Spinacia oleracea</i>           | 26.3   | 25.4   | 25.5   | 1.0 | 0.4 | 1.0 | 0.4 |
| 1418 | 022b04 | AV623473 | LC064c07  | nifU-like protein                                        | <i>Arabidopsis thaliana</i>        | 11.8   | 7.6    | 11.8   | 0.7 | 0.2 | 0.7 | 0.2 |
| 1419 | 142h12 | AV625527 | LC094b06  | Nitrate reductase                                        | <i>Hordeum spontaneum</i>          | 29.6   | 17.4   | 40.9   | 0.6 | 0.2 | 0.7 | 0.5 |
| 1420 | 134a01 | AV645300 | HCL100g10 | NM23-M7                                                  | <i>Mus musculus</i>                | 13.1   | 16.0   | 9.1    | 1.2 | 0.4 | 1.9 | 0.8 |
| 1421 | 016c11 | AV642019 | HCL044a09 | NM23-M7                                                  | <i>Mus musculus</i>                | 3.7    | 4.6    | 3.4    | 1.3 | 0.2 | 1.4 | 0.2 |
| 1422 | 172d07 | BP098361 | MXL092b11 | Nodulin 21-related protein                               | <i>Deinococcus radiodurans</i>     | 14.1   | 14.4   | 12.3   | 1.1 | 0.3 | 1.2 | 0.2 |
| 1423 | 024b02 | AV626347 | LCL007d07 | Nonclathrin coat protein gamma-like protein              | <i>Arabidopsis thaliana</i>        | 32.1   | 24.2   | 25.6   | 0.8 | 0.1 | 0.9 | 0.0 |
| 1424 | 021g03 | AV622773 | LC054c10  | Non-functional folate binding protein                    | <i>Homo sapiens</i>                | 7755.8 | 8072.0 | 7376.9 | 1.0 | 0.2 | 1.4 | 0.8 |
| 1425 | 164c10 | BP094715 | MXL028a09 | Nonphototropic hypocotyl 1b                              | <i>Oryza sativa</i>                | 22.1   | 27.8   | 20.4   | 1.2 | 0.2 | 1.4 | 0.5 |
| 1426 | 017a02 | AV642739 | HCL057a09 | Nonphototropic hypocotyl 2                               | <i>Arabidopsis thaliana</i>        | 7.4    | 11.4   | 9.5    | 1.5 | 0.2 | 1.2 | 0.2 |
| 1427 | 004a06 | AV386512 | CM001g11  | Non-specific lipid-transfer protein                      | <i>Bos taurus</i>                  | 36.9   | 36.1   | 29.1   | 1.0 | 0.1 | 1.3 | 0.3 |
| 1428 | 103h09 | AV395540 | CL43b09   | NRF-related kinase                                       | <i>Tetrahymena pyriformis</i>      | 13.5   | 10.5   | 15.5   | 0.8 | 0.2 | 0.8 | 0.4 |
| 1429 | 033c02 | BP094212 | MXL019f04 | NTPFP2                                                   | <i>Nicotiana tabacum</i>           | 16.2   | 17.9   | 16.0   | 1.1 | 0.1 | 1.2 | 0.2 |
| 1430 | 102b03 | AV394094 | CL18g12   | Nuclear distribution protein C homolog                   | <i>Homo sapiens</i>                | 7.1    | 7.9    | 7.4    | 1.2 | 0.4 | 1.1 | 0.3 |
| 1431 | 013b07 | AV638118 | HC082b09  | Nuclear inhibitor of protein phosphatase-1               | <i>Mus musculus</i>                | 13.7   | 13.1   | 13.3   | 1.0 | 0.1 | 1.0 | 0.4 |
| 1432 | 135d03 | AV619921 | LC015a09  | Nuclear localization signals (NLS)-binding protein       | <i>Mus musculus</i>                | 4.4    | 6.1    | 5.1    | 1.4 | 0.2 | 1.2 | 0.2 |
| 1433 | 119e01 | AV635053 | HC041c09  | Nuclear localization signals (NLS)-binding protein       | <i>Mus musculus</i>                | 17.5   | 14.9   | 19.4   | 0.9 | 0.2 | 0.8 | 0.3 |
| 1434 | 034e02 | BP095848 | MXL048c07 | Nuclear protein                                          | <i>Chlamydomonas reinhardtii</i>   | 7.8    | 11.7   | 7.4    | 1.6 | 0.4 | 1.6 | 0.4 |
| 1435 | 137d08 | AV621538 | LC037e03  | Nuclear protein                                          | <i>Chlamydomonas reinhardtii</i>   | 5.7    | 6.8    | 5.0    | 1.2 | 0.2 | 1.4 | 0.2 |
| 1436 | 016g10 | AV642559 | HCL053h05 | Nucleolar phosphoprotein                                 | <i>Tetrahymena thermophila</i>     | 26.7   | 14.4   | 35.4   | 0.6 | 0.1 | 0.6 | 0.4 |
| 1437 | 009h12 | AV631953 | HC002b04  | Nucleoside diphosphate kinase                            | <i>Saccharum officinarum</i>       | 101.0  | 56.5   | 65.2   | 0.6 | 0.0 | 0.9 | 0.2 |
| 1438 | 117c03 | AV632395 | HC007f11  | Nucleosome assembly protein H-like protein               | <i>Arabidopsis thaliana</i>        | 22.8   | 15.5   | 17.6   | 0.7 | 0.1 | 0.9 | 0.2 |
| 1439 | 112f04 | AV392103 | CM058c08  | Nucleotide binding protein 1                             | <i>Escherichia coli</i>            | 17.6   | 12.2   | 14.1   | 0.7 | 0.0 | 0.9 | 0.2 |
| 1440 | 170a06 | AV387199 | CM006d11  | OBP33pep                                                 | <i>Arabidopsis thaliana</i>        | 15.0   | 14.4   | 16.9   | 1.0 | 0.2 | 0.9 | 0.3 |
| 1441 | 159a09 | BP087728 | MX042d06  | OEE3 protein of photosystem II                           | <i>Chlamydomonas reinhardtii</i>   | 237.8  | 153.4  | 134.4  | 0.6 | 0.4 | 2.3 | 2.3 |
| 1442 | 139f02 | AV623234 | LC060g10  | OEE3 protein of photosystem II , oxygen-evolving protein | <i>Chlamydomonas reinhardtii</i>   | 258.3  | 99.0   | 131.8  | 0.4 | 0.2 | 0.9 | 0.7 |
| 1443 | 001h12 | AV394701 | CL27c05   | Oli2 gene product                                        | <i>Saccharomyces cerevisiae</i>    | 25.9   | 19.1   | 23.0   | 0.8 | 0.1 | 0.8 | 0.1 |
| 1444 | 158f03 | BP087672 | MX041a10  | Omega 6 desaturase                                       | <i>Chlamydomonas reinhardtii</i>   | 50.8   | 58.3   | 67.1   | 1.6 | 1.3 | 0.8 | 0.5 |
| 1445 | 035d10 | BP097029 | MXL06h07  | Omega-3 fatty acid desaturase                            | <i>Chlorella vulgaris</i>          | 37.6   | 21.0   | 41.3   | 0.6 | 0.1 | 0.5 | 0.0 |
| 1446 | 007c01 | AV391291 | CM053a01  | Omega-3 fatty acid desaturase, endoplasmic reticulum     | <i>Chlorella vulgaris</i>          | 10.4   | 11.3   | 16.4   | 1.1 | 0.3 | 0.7 | 0.3 |
| 1447 | 005c04 | AV387969 | CM021b05  | Omnipotent suppressor protein SUP1 homolog               | <i>Arabidopsis thaliana</i>        | 16.8   | 9.3    | 11.8   | 0.6 | 0.3 | 0.8 | 0.1 |
| 1448 | 005e06 | AV388108 | CM025f03  | ORF                                                      | <i>Mus musculus</i>                | 14.2   | 25.2   | 19.7   | 1.8 | 0.6 | 1.6 | 1.0 |
| 1449 | 018g05 | AV619085 | LC003e10  | ORF                                                      | <i>Ricinus communis</i>            | 18.2   | 14.1   | 16.4   | 0.8 | 0.1 | 0.8 | 0.2 |
| 1450 | 120c04 | AV635914 | HC052h04  | ORF T                                                    | <i>Lactobacillus sakei</i>         | 141.7  | 182.4  | 140.9  | 1.3 | 0.2 | 1.4 | 0.4 |
| 1451 | 114a07 | AV388698 | CM072c11  | ORF_o194                                                 | <i>Escherichia coli</i>            | 14.5   | 12.0   | 15.6   | 0.8 | 0.1 | 0.8 | 0.2 |
| 1452 | 026d05 | AV628306 | LCL039h01 | ORF2                                                     | <i>Pseudorabies virus</i>          | 16.4   | 14.1   | 14.8   | 0.9 | 0.1 | 0.9 | 0.1 |
| 1453 | 130h04 | AV643726 | HCL074h09 | ORF2                                                     | <i>Pseudorabies virus</i>          | 18.9   | 14.0   | 16.8   | 0.7 | 0.1 | 0.9 | 0.2 |
| 1454 | 139b11 | AV622892 | LC056b09  | ORF-3 protein                                            | <i>Pseudorabies virus</i>          | 5.8    | 10.7   | 5.4    | 1.8 | 0.5 | 2.0 | 0.8 |
| 1455 | 126h02 | AV641535 | HCL035g03 | ORF-3 protein                                            | <i>Pseudorabies virus</i>          | 8.6    | 10.9   | 11.9   | 1.3 | 0.2 | 0.9 | 0.3 |
| 1456 | 004h06 | AV387427 | CM015e11  | Ornithine aminotransferase                               | <i>Rattus norvegicus</i>           | 8.5    | 7.0    | 7.4    | 0.8 | 0.3 | 1.0 | 0.4 |
| 1457 | 011g11 | AV635530 | HC047e06  | Ornithine decarboxylase                                  | <i>Trypanosoma brucei</i>          | 24.9   | 18.1   | 23.6   | 0.7 | 0.2 | 0.8 | 0.3 |
| 1458 | 100g08 | AV633543 | HC022a05  | Ornithine decarboxylase                                  | <i>Ustilago maydis</i>             | 34.4   | 22.5   | 31.7   | 0.6 | 0.1 | 0.7 | 0.3 |
| 1459 | 129h01 | AV643066 | HCL063b07 | Ornithine aminotransferase                               | <i>Drosophila ananassae</i>        | 7.3    | 7.4    | 5.4    | 1.0 | 0.3 | 1.4 | 0.3 |
| 1460 | 105a02 | AV396124 | CL56b11   | Orthophosphate dikinase                                  | <i>Oryza sativa</i>                | 18.3   | 26.2   | 23.1   | 1.6 | 0.5 | 1.1 | 0.0 |
| 1461 | 020c12 | AV620938 | LC028h03  | Outer arm dynein light chain 1                           | <i>Chlamydomonas reinhardtii</i>   | 15.1   | 15.3   | 12.6   | 1.0 | 0.1 | 1.6 | 1.1 |
| 1462 | 122h12 | AV639064 | HC094e07  | Outer arm dynein light chain, 19K                        | <i>Chlamydomonas reinhardtii</i>   | 70.9   | 77.0   | 50.5   | 1.1 | 0.1 | 1.5 | 0.2 |
| 1463 | 112b07 | AV391531 | CM055a11  | Outer-arm dynein Mr78,000 intermediate chain subunit     | <i>Chlamydomonas reinhardtii</i>   | 21.2   | 27.3   | 24.1   | 1.4 | 0.4 | 1.1 | 0.2 |
| 1464 | 122h07 | AV389431 | CM075e05  | Oxygen evolving enhancer protein 3                       | <i>Chlamydomonas reinhardtii</i>   | 226.0  | 96.3   | 164.2  | 0.4 | 0.2 | 0.7 | 0.5 |
| 1465 | 154h01 | AV631164 | LCL089g02 | oxidoreductase, putative                                 | <i>Deinococcus radiodurans</i>     | 8.0    | 6.1    | 8.0    | 0.8 | 0.2 | 0.8 | 0.0 |
| 1466 | 034a02 | BP095139 | MXL036e03 | Oxoglutarate dehydrogenase - like protein                | <i>Arabidopsis thaliana</i>        | 38.8   | 28.2   | 25.1   | 0.7 | 0.1 | 1.2 | 0.3 |
| 1467 | 031c04 | BP086669 | MX014a07  | Oxoglutarate dehydrogenase - like protein                | <i>Arabidopsis thaliana</i>        | 44.2   | 35.1   | 32.6   | 0.8 | 0.1 | 1.1 | 0.1 |
| 1468 | 005b08 | AV397467 | CM020d02  | Oxygen-evolving enhancer protein 1                       | <i>Chlamydomonas reinhardtii</i>   | 229.5  | 120.3  | 184.3  | 0.5 | 0.3 | 0.6 | 0.4 |
| 1469 | 159b09 | BP087746 | MX042g08  | Oxygen-evolving enhancer protein 2                       | <i>Chlamydomonas reinhardtii</i>   | 472.5  | 365.3  | 200.5  |     |     |     |     |

|      | A      | B        | C         | D                                                              | E                                            | F      | G     | H      | I    | J    | K   | L   |
|------|--------|----------|-----------|----------------------------------------------------------------|----------------------------------------------|--------|-------|--------|------|------|-----|-----|
| 1496 | 110e03 | AV389354 | CM036b12  | Peptide methionine sulfoxide reductase                         | <i>Methanothermobacter thermoautotrophus</i> | 387.9  | 348.8 | 325.5  | 0.9  | 0.5  | 1.1 | 0.7 |
| 1497 | 019d08 | AV619835 | LC014d04  | Peptide methionine sulfoxide reductase                         | <i>Methanobacterium thermoautotrophicum</i>  | 60.8   | 52.1  | 54.9   | 0.9  | 0.2  | 1.1 | 0.5 |
| 1498 | 160h04 | BP089367 | MX205h10  | Peptide methionine sulfoxide reductase                         | <i>Deinococcus radiodurans</i>               | 11.6   | 7.8   | 11.2   | 0.7  | 0.3  | 0.8 | 0.4 |
| 1499 | 020d11 | AV621051 | LC030e01  | Peptidyl-prolyl cis-trans isomerase                            | <i>Arabidopsis thaliana</i>                  | 9.3    | 12.0  | 11.8   | 1.3  | 0.4  | 1.1 | 0.3 |
| 1500 | 008f03 | AV388711 | CM072c03  | Peptidyl-prolyl cis-trans isomerase                            | <i>Arabidopsis thaliana</i>                  | 17.5   | 23.9  | 27.5   | 1.5  | 0.4  | 0.9 | 0.2 |
| 1501 | 015h09 | AV641536 | HCL035g04 | Period protein                                                 | <i>Drosophila simulans</i>                   | 11.5   | 13.3  | 15.1   | 1.2  | 0.1  | 0.9 | 0.2 |
| 1502 | 010d11 | AV632766 | HC012c11  | Periplasmic carbonic anhydrase, CA2                            | <i>Chlamydomonas reinhardtii</i>             | 88.9   | 140.6 | 135.2  | 1.7  | 0.5  | 1.1 | 0.2 |
| 1503 | 168b05 | AV392832 | CM064f05  | Periplasmic carbonic anhydrase, CAH1                           | <i>Chlamydomonas reinhardtii</i>             | 17.0   | 750.8 | 102.4  | 44.3 | 2.6  | 8.4 | 3.8 |
| 1504 | 134f03 | AU301235 | LC008c02  | Periplasmic carbonic anhydrase, CAH1                           | <i>Chlamydomonas reinhardtii</i>             | 9.8    | 876.7 | 124.3  | 87.6 | 28.6 | 6.8 | 1.7 |
| 1505 | 009g03 | AV393043 | CM097d06  | Periplasmic carbonic anhydrase, CAH1                           | <i>Chlamydomonas reinhardtii</i>             | 10.6   | 465.2 | 72.9   | 42.6 | 11.7 | 6.3 | 2.6 |
| 1506 | 029a04 | AV630476 | LCL079d09 | Periplasmic carbonic anhydrase, CAH1                           | <i>Chlamydomonas reinhardtii</i>             | 19.6   | 569.9 | 95.5   | 29.2 | 6.1  | 5.9 | 0.2 |
| 1507 | 002b01 | AV389178 | CM035d02  | Periplasmic carbonic anhydrase, CAH1                           | <i>Chlamydomonas reinhardtii</i>             | 9.6    | 493.1 | 83.4   | 54.9 | 26.8 | 5.9 | 2.1 |
| 1508 | 159d05 | BP087777 | MX043d06  | Periplasmic carbonic anhydrase, CAH1                           | <i>Chlamydomonas reinhardtii</i>             | 9.2    | 760.2 | 146.4  | 84.7 | 15.8 | 5.2 | 0.8 |
| 1509 | 141b05 | AV624314 | LC076a02  | Peroxiredoxin (thioredoxin peroxidase gene)                    | <i>Chlamydomonas reinhardtii</i>             | 79.4   | 90.8  | 100.2  | 1.2  | 0.3  | 1.2 | 0.8 |
| 1510 | 135b10 | AV619885 | LC013b06  | Peroxiredoxin (thioredoxin peroxidase gene)                    | <i>Chlamydomonas reinhardtii</i>             | 72.3   | 91.2  | 105.3  | 1.3  | 0.1  | 1.1 | 0.6 |
| 1511 | 140e12 | AV623921 | LC070e05  | Peroxiredoxin (thioredoxin peroxidase gene)                    | <i>Chlamydomonas reinhardtii</i>             | 70.4   | 46.4  | 57.1   | 0.7  | 0.4  | 0.8 | 0.2 |
| 1512 | 113g07 | AV639476 | HC099h02  | Peroxisomal D2,D4-dienoyl-CoA reductase                        | <i>Mus musculus</i>                          | 6.4    | 8.3   | 7.3    | 1.3  | 0.3  | 1.2 | 0.3 |
| 1513 | 113a05 | AV392664 | CM063a02  | Peroxisomal short-chain alcohol dehydrogenase                  | <i>Homo sapiens</i>                          | 6.1    | 5.4   | 5.6    | 0.9  | 0.1  | 1.0 | 0.2 |
| 1514 | 104c10 | AV395790 | CL48d09   | Perphorin I precursor                                          | <i>Volvox carteri</i>                        | 21.7   | 32.5  | 9.6    | 1.5  | 0.2  | 3.5 | 1.1 |
| 1515 | 030c11 | AV631533 | LCL095g10 | Perphorin I precursor                                          | <i>Volvox carteri</i>                        | 36.7   | 34.0  | 15.8   | 1.0  | 0.2  | 2.1 | 0.2 |
| 1516 | 161c06 | BP093026 | MXL002c12 | Perphorin I precursor                                          | <i>Volvox carteri</i>                        | 10.8   | 12.4  | 10.3   | 1.3  | 0.6  | 1.4 | 0.7 |
| 1517 | 031h09 | BP087492 | MX035f06  | Perphorin I precursor                                          | <i>Volvox carteri</i>                        | 26.5   | 40.5  | 30.4   | 1.8  | 0.6  | 1.3 | 0.3 |
| 1518 | 103h05 | AV395245 | CL37h12   | Perphorin II                                                   | <i>Volvox carteri</i>                        | 154.8  | 166.8 | 118.2  | 1.2  | 0.5  | 1.5 | 0.4 |
| 1519 | 031h06 | BP087452 | MX034h02  | PF16                                                           | <i>Chlamydomonas reinhardtii</i>             | 11.3   | 18.0  | 10.2   | 1.6  | 0.5  | 1.9 | 0.7 |
| 1520 | 109a08 | AV387818 | CM023e04  | PF16                                                           | <i>Chlamydomonas reinhardtii</i>             | 14.3   | 19.7  | 11.6   | 1.4  | 0.2  | 1.7 | 0.1 |
| 1521 | 033b02 | BP094065 | MXL017f07 | P-glycoprotein                                                 | <i>Gossypium hirsutum</i>                    | 7.9    | 7.6   | 9.0    | 0.9  | 0.4  | 0.9 | 0.5 |
| 1522 | 153a03 | AV630277 | LCL076e10 | PHAP2A protein                                                 | <i>Petunia x hybrida</i>                     | 15.8   | 18.7  | 13.2   | 1.2  | 0.3  | 1.4 | 0.2 |
| 1523 | 015f12 | AV641328 | HCL031g01 | PHAP2A protein                                                 | <i>Petunia x hybrida</i>                     | 1.0    | 0.7   | 0.9    | 0.9  | 0.6  | 0.9 | 0.6 |
| 1524 | 020h06 | AV621582 | LC038a11  | Phenylalanine-tRNA synthetase                                  | <i>Arabidopsis thaliana</i>                  | 24.7   | 19.4  | 18.4   | 0.8  | 0.2  | 1.1 | 0.4 |
| 1525 | 024h10 | AV626907 | LCL017h05 | Phenylalanyl-tRNA synthetase beta-subunit                      | <i>Homo sapiens</i>                          | 14.3   | 8.5   | 12.9   | 0.6  | 0.2  | 0.7 | 0.1 |
| 1526 | 146h10 | AV627303 | LCL024f10 | Pherophorin I                                                  | <i>Volvox carteri</i>                        | 1429.7 | 626.2 | 1091.1 | 0.4  | 0.1  | 0.6 | 0.4 |
| 1527 | 023b03 | AV624679 | LC081b06  | Pherophorin I precursor                                        | <i>Volvox carteri</i>                        | 23.3   | 21.1  | 13.4   | 1.0  | 0.3  | 1.6 | 0.4 |
| 1528 | 170f11 | BP097549 | MXL077f02 | Pherophorin-S                                                  | <i>Volvox carteri</i>                        | 80.6   | 98.7  | 81.8   | 1.2  | 0.4  | 1.2 | 0.6 |
| 1529 | 017e04 | AV643278 | HCL066g08 | Pherophorin-S                                                  | <i>Volvox carteri</i>                        | 5.2    | 5.0   | 4.9    | 1.0  | 0.3  | 1.1 | 0.2 |
| 1530 | 028g05 | AV630260 | LCL076c03 | Pherophorin-S                                                  | <i>Volvox carteri</i>                        | 1.5    | 2.7   | 2.7    | 1.8  | 0.5  | 1.0 | 0.3 |
| 1531 | 016a11 | AV641647 | HCL038a07 | Pherophorin-S                                                  | <i>Volvox carteri</i>                        | 30.6   | 22.7  | 45.6   | 0.8  | 0.2  | 0.8 | 0.5 |
| 1532 | 127b03 | AV641638 | HCL037h07 | Pherophorin-S                                                  | <i>Volvox carteri</i>                        | 19.8   | 17.1  | 23.6   | 0.9  | 0.1  | 0.7 | 0.1 |
| 1533 | 020h02 | AV621534 | LC037d05  | Phosphatase like protein                                       | <i>Arabidopsis thaliana</i>                  | 4.7    | 4.3   | 3.8    | 0.9  | 0.2  | 1.1 | 0.2 |
| 1534 | 140f04 | AV623956 | LC071a01  | Phosphatase like protein                                       | <i>Arabidopsis thaliana</i>                  | 12.5   | 8.0   | 10.3   | 0.6  | 0.1  | 0.8 | 0.3 |
| 1535 | 018g12 | AV619137 | LC004c10  | Phosphatase PP1                                                | <i>Chlamydomonas reinhardtii</i>             | 23.3   | 23.2  | 19.6   | 1.0  | 0.1  | 1.2 | 0.1 |
| 1536 | 001d02 | AV393787 | CL11b07   | Phosphate permease                                             | <i>Haemophilus influenzae Rd</i>             | 3.1    | 5.2   | 6.0    | 1.9  | 0.6  | 1.0 | 0.5 |
| 1537 | 007h04 | AV392489 | CM061g11  | Phosphate/phosphoenolpyruvate translocator precursor           | <i>Zea mays</i>                              | 12.5   | 10.9  | 8.5    | 0.9  | 0.2  | 1.3 | 0.2 |
| 1538 | 147g12 | AV627707 | LCL030h03 | Phosphate/phosphoenolpyruvate translocator precursor           | <i>Zea mays</i>                              | 13.9   | 14.3  | 11.1   | 1.0  | 0.3  | 1.3 | 0.3 |
| 1539 | 139e07 | AV623149 | LC059f01  | Phosphate/phosphoenolpyruvate translocator precursor           | <i>Zea mays</i>                              | 9.0    | 5.8   | 5.8    | 0.6  | 0.1  | 1.0 | 0.3 |
| 1540 | 162b02 | BP093502 | MXL009c08 | Phosphate-Repressible Phosphate Kinase                         | <i>Leishmania major</i>                      | 10.4   | 12.7  | 8.8    | 1.2  | 0.2  | 1.9 | 1.1 |
| 1541 | 118b07 | AV636677 | HC062g02  | Phosphoenolpyruvate carboxylase                                | <i>Flavaria pringlei</i>                     | 74.7   | 60.2  | 48.1   | 0.8  | 0.0  | 1.3 | 0.1 |
| 1542 | 015a08 | AV640704 | HCL021a03 | Phosphoenolpyruvate carboxylase (ATP) - like protein           | <i>Arabidopsis thaliana</i>                  | 11.1   | 11.1  | 9.7    | 1.0  | 0.0  | 1.2 | 0.2 |
| 1543 | 151f06 | AV629602 | LCL061g09 | Phosphoenolpyruvate carboxylase                                | <i>Saccharum sp.</i>                         | 19.1   | 18.4  | 20.5   | 1.0  | 0.1  | 0.9 | 0.1 |
| 1544 | 171h02 | BP098115 | MXL087d01 | Phosphoenolpyruvate carboxylase                                | <i>Vanilla planifolia</i>                    | 7.6    | 5.9   | 10.1   | 0.7  | 0.4  | 0.7 | 0.6 |
| 1545 | 007d09 | AV391653 | CM055e10  | Phosphoenolpyruvate carboxylase 3                              | <i>Kalanchoe blossfeldiana</i>               | 21.5   | 20.3  | 38.3   | 1.0  | 0.1  | 0.6 | 0.3 |
| 1546 | 155f03 | AV631506 | LCL095c06 | Phosphoenolpyruvate carboxylase isoform 1                      | <i>Hydrillaverticillata</i>                  | 28.3   | 23.4  | 48.2   | 0.9  | 0.2  | 0.7 | 0.5 |
| 1547 | 138c10 | AV622208 | LC046e12  | Phosphoenolpyruvate carboxylase-like                           | <i>Arabidopsis thaliana</i>                  | 20.0   | 21.3  | 18.4   | 1.1  | 0.1  | 1.2 | 0.2 |
| 1548 | 170b04 | BP097267 | MXL072g06 | Phosphoglucosyltransferase                                     | <i>Arabidopsis thaliana</i>                  | 31.7   | 22.5  | 17.4   | 0.7  | 0.2  | 1.5 | 0.8 |
| 1549 | 170c01 | BP097321 | MXL073g03 | Phosphoglucosyltransferase                                     | <i>Arabidopsis thaliana</i>                  | 38.9   | 34.8  | 25.4   | 0.9  | 0.2  | 1.4 | 0.5 |
| 1550 | 103d05 | AV395160 | CL36b11   | Phosphoglycerate dehydrogenase                                 | <i>Arabidopsis thaliana</i>                  | 18.3   | 10.6  | 13.6   | 0.6  | 0.1  | 0.8 | 0.2 |
| 1551 | 009g06 | AV392705 | CM098g07  | Phosphoglycerate kinase                                        | <i>Arabidopsis thaliana</i>                  | 12.9   | 8.4   | 11.5   | 0.7  | 0.2  | 0.8 | 0.3 |
| 1552 | 018e04 | AU301232 | HCL092e04 | Phosphoglycerate kinase                                        | <i>Chlamydomonas reinhardtii</i>             | 49.5   | 23.6  | 32.5   | 0.5  | 0.3  | 0.7 | 0.3 |
| 1553 | 017e07 | AV643350 | HCL068b03 | Phosphoglycerate kinase precursor                              | <i>Chlamydomonas reinhardtii</i>             | 43.9   | 18.1  | 28.8   | 0.5  | 0.2  | 0.6 | 0.2 |
| 1554 | 011f10 | AV635306 | HC044f08  | Phosphoglycerate kinase, chloroplast                           | <i>Chlamydomonas reinhardtii</i>             | 42.0   | 16.9  | 33.9   | 0.4  | 0.1  | 0.5 | 0.1 |
| 1555 | 028g05 | AV630273 | LCL076e03 | Phosphoglyceromutase                                           | <i>Mesembryanthemum crystallinum</i>         | 39.4   | 26.0  | 23.7   | 0.7  | 0.1  | 1.1 | 0.3 |
| 1556 | 119g03 | AV635342 | HC045b07  | Phosphoglycolate phosphatase, Pgp1                             | <i>Chlamydomonas reinhardtii</i>             | 9.1    | 36.4  | 26.3   | 4.2  | 1.0  | 1.4 | 0.3 |
| 1557 | 021d10 | AU301240 | LC049g05  | Phosphoglycolate phosphatase, Pgp1                             | <i>Chlamydomonas reinhardtii</i>             | 21.2   | 50.9  | 65.9   | 2.4  | 0.3  | 0.8 | 0.2 |
| 1558 | 163d08 | BP094257 | MXL020b10 | Phosphoinositide-specific phospholipase C                      | <i>Ictalurus punctatus</i>                   | 7.2    | 6.4   | 5.9    | 0.9  | 0.2  | 1.1 | 0.2 |
| 1559 | 002e14 | AV395458 | CL42a05   | Phosphoprotein phosphatase 2A 65K regulatory chain homolog pDF | <i>Arabidopsis thaliana</i>                  | 14.6   | 19.9  | 12.9   | 1.4  | 0.3  | 1.6 | 0.5 |
| 1560 | 009a02 | AV390440 | CM083f05  | Phosphoribosylaminoimidazole carboxylase (ade6)                | <i>Schizosaccharomyces pombe</i>             | 197.7  | 192.6 | 149.4  | 1.0  | 0.0  | 1.3 | 0.0 |
| 1561 | 006d09 | AV389909 | CM040e01  | Phosphoribosyl-ATP pyrophosphorylase                           | <i>Arabidopsis thaliana</i>                  | 6.1    | 4.6   | 7.2    | 0.8  | 0.1  | 0.7 | 0.1 |
| 1562 | 168a03 | BP096274 | MXL055g12 | Phosphoribosylformylglycinamide cyclo-ligase                   | <i>Arabidopsis thaliana</i>                  | 27.8   | 27.4  | 13.9   | 1.0  | 0.1  | 2.3 | 1.0 |
| 1563 | 170g10 | BP097602 | MXL078c12 | Phosphoribosylformylglycinamide cyclo-ligase                   | <i>Arabidopsis thaliana</i>                  | 22.1   | 16.7  | 19.8   | 0.7  | 0.1  | 0.9 | 0.6 |
| 1564 | 035g11 | BP097428 | MXL075e08 | Phosphoribulokinase                                            | <i>Chlamydomonas reinhardtii</i>             | 136.9  | 87.4  | 127.4  | 0.7  | 0.3  | 0.7 | 0.3 |
| 1565 | 109a07 | AV387804 | CM023e03  | Phosphorylation regulatory protein HP-10 - human               | <i>Homo sapiens</i>                          | 8.5    | 7.5   | 6.5    | 0.9  | 0.1  | 1.1 | 0.2 |
| 1566 | 014d05 | AV639998 | HCL008e04 | Phosphoserine aminotransferase                                 | <i>Spinacia oleracea</i>                     | 22.1   | 21.5  | 19.4   | 1.0  | 0.1  | 1.1 | 0.1 |
| 1567 | 023h09 | AV626232 | LCL004g09 | Phosphoserine phosphatase                                      | <i>Arabidopsis thaliana</i>                  | 9.0    | 18.7  | 11.9   | 2.2  | 0.6  | 1.6 | 0.2 |
| 1568 | 027b03 | AV628876 | LCL048c12 | Phosphoserine transaminase                                     | <i>Arabidopsis thaliana</i>                  | 46.3   | 26.3  | 23.4   | 0.6  | 0.1  | 1.2 | 0.3 |
| 1569 | 113a10 | AV392707 | CM063c08  | Phosphotransacetylase                                          | <i>Synechocystis sp. PCC 6803</i>            | 7.9    | 10.5  | 5.3    | 1.3  | 0.1  | 2.0 | 0.2 |
| 1570 | 160f04 | BP088844 | MX101g04  | Photosystem I chain III precursor                              | <i>Chlamydomonas reinhardtii</i>             | 156.4  | 127.6 | 128.1  | 0.8  | 0.1  | 1.1 | 0.5 |
| 1571 | 115a11 | AV390345 | CM083h12  | photosystem I hydrophobic protein                              | <i>Hordeum vulgare</i>                       | 116.6  | 118.9 | 149.6  | 1.2  | 0.5  | 0.8 | 0.1 |
| 1572 | 007c05 | AV391372 | CM053e11  | Photosystem I reaction center subunit II                       | <i>Chlamydomonas reinhardtii</i>             | 156.9  | 152.3 | 170.9  | 1.0  | 0.3  | 0.9 | 0.4 |
| 1573 | 005e02 | AV388069 | CM025a02  | Photosystem I reaction center subunit III                      | <i>Chlamydomonas reinhardtii</i>             | 103.4  | 92.6  | 100.9  | 1.0  | 0.2  | 1.0 | 0.2 |
| 1574 | 004a09 | AV397845 | CM002f02  | Photosystem I reaction center subunit V                        | <i>Chlamydomonas reinhardtii</i>             | 85.3   | 90.5  | 62.5   | 1.1  | 0.0  | 1.6 | 0.8 |
| 1575 | 035f09 | BP097286 | MXL073a11 | Photosystem I reaction center subunit V                        | <i>Chlamydomonas reinhardtii</i>             | 339.9  | 176.8 | 209.8  | 0.4  | 0.2  | 0.9 | 0.9 |

|      | A      | B        | C         | D                                                                  | E                                          | F     | G     | H     | I   | J   | K   | L   |
|------|--------|----------|-----------|--------------------------------------------------------------------|--------------------------------------------|-------|-------|-------|-----|-----|-----|-----|
| 1603 | 027e10 | AV629263 | LCL055e09 | Plastoglobule associated protein PG1 precursor                     | <i>Pisum sativum</i>                       | 11.4  | 14.5  | 14.0  | 1.3 | 0.3 | 1.0 | 0.2 |
| 1604 | 036h11 | BP098880 | MXL100g01 | PNIL34                                                             | <i>Ipomoea nil</i>                         | 84.6  | 41.6  | 131.7 | 0.5 | 0.0 | 0.3 | 0.0 |
| 1605 | 144a06 | AV626074 | LCL002a04 | Poly(A) binding protein RB47                                       | <i>Chlamydomonas reinhardtii</i>           | 59.1  | 54.2  | 43.1  | 0.9 | 0.0 | 1.3 | 0.1 |
| 1606 | 005d01 | AV387829 | CM022f05  | Poly(A) binding protein RB47                                       | <i>Chlamydomonas reinhardtii</i>           | 15.8  | 21.9  | 18.1  | 1.5 | 0.4 | 1.2 | 0.2 |
| 1607 | 023c11 | AV624944 | LC084h04  | Poly(A) binding protein RB47                                       | <i>Chlamydomonas reinhardtii</i>           | 70.3  | 59.6  | 58.0  | 0.8 | 0.1 | 1.0 | 0.0 |
| 1608 | 004f10 | AV387162 | CM012e01  | Poly(A) binding protein RB47                                       | <i>Chlamydomonas reinhardtii</i>           | 17.9  | 12.5  | 16.2  | 0.7 | 0.2 | 0.8 | 0.1 |
| 1609 | 017c12 | AV642974 | HCL061e02 | Poly(A) Polymerase                                                 | <i>Pisum sativum</i>                       | 40.2  | 29.3  | 34.8  | 0.7 | 0.0 | 0.9 | 0.2 |
| 1610 | 032b03 | BP092970 | MXL001e11 | Polycystic kidney disease                                          | <i>Chlamydomonas reinhardtii</i>           | 6.8   | 7.5   | 6.8   | 1.1 | 0.2 | 1.1 | 0.1 |
| 1611 | 008f08 | AV389203 | CM074d12  | Polyprotein                                                        | <i>Volvox carteri</i>                      | 7.4   | 6.8   | 8.9   | 0.9 | 0.3 | 0.7 | 0.1 |
| 1612 | 010g02 | AV633442 | HC020h01  | Polubiquitin 5                                                     | <i>Volvox carteri</i>                      | 52.7  | 81.6  | 95.6  | 1.5 | 0.1 | 0.8 | 0.2 |
| 1613 | 116c08 | AV392304 | CM098c11  | Pontin52                                                           | <i>Mus musculus</i>                        | 7.6   | 6.0   | 4.4   | 0.8 | 0.2 | 1.4 | 0.1 |
| 1614 | 163c06 | BP094174 | MXL019b02 | Porphobilinogen deaminase, chloroplast precursor (PBG)             | <i>Pisum sativum</i>                       | 60.3  | 16.7  | 47.5  | 0.3 | 0.1 | 0.3 | 0.2 |
| 1615 | 156h09 | BP086423 | MXL008e11 | Porphobilinogen deaminase, chloroplast precursor (PBG)             | <i>Pisum sativum</i>                       | 89.5  | 11.9  | 76.4  | 0.1 | 0.0 | 0.2 | 0.0 |
| 1616 | 009d04 | AV391237 | CM089e03  | Possible calmodulinlike calcium-binding                            | <i>Homo sapiens</i>                        | 11.8  | 23.8  | 15.2  | 2.1 | 0.5 | 1.6 | 0.5 |
| 1617 | 134d10 | AV619240 | LC005e12  | Possible membrane protein, low CO <sub>2</sub> -induced            | <i>Chlamydomonas reinhardtii</i>           | 5.3   | 41.0  | 16.9  | 7.7 | 3.3 | 2.5 | 1.3 |
| 1618 | 140b07 | AV623648 | LC086g05  | POTATP1                                                            | <i>Solanum tuberosum</i>                   | 18.4  | 42.0  | 28.8  | 2.3 | 0.6 | 1.5 | 0.1 |
| 1619 | 029c06 | AV630739 | LCL083e08 | POTATP1                                                            | <i>Solanum tuberosum</i>                   | 20.7  | 17.0  | 26.8  | 0.8 | 0.1 | 0.6 | 0.1 |
| 1620 | 004c01 | AV386677 | CM004d10  | Predicted protein                                                  | <i>Arabidopsis thaliana</i>                | 45.8  | 74.2  | 49.3  | 1.6 | 0.3 | 1.5 | 0.4 |
| 1621 | 011e04 | AV634944 | HC039h12  | Predicted protein                                                  | <i>Caenorhabditis elegans</i>              | 75.8  | 89.0  | 73.7  | 1.2 | 0.3 | 1.3 | 0.4 |
| 1622 | 116b03 | AV392621 | CM096d12  | Predicted protein                                                  | <i>Arabidopsis thaliana</i>                | 103.6 | 175.3 | 145.8 | 2.0 | 0.9 | 1.2 | 0.1 |
| 1623 | 004f07 | AV386887 | CM011h01  | Predicted protein                                                  | <i>Arabidopsis thaliana</i>                | 12.4  | 11.3  | 9.8   | 0.9 | 0.1 | 1.1 | 0.2 |
| 1624 | 112g06 | AV392291 | CM060f06  | Predicted protein                                                  | <i>Caenorhabditis elegans</i>              | 59.2  | 72.8  | 64.8  | 1.2 | 0.1 | 1.1 | 0.2 |
| 1625 | 022f08 | AV624093 | LC072h02  | Predicted protein                                                  | <i>Arabidopsis thaliana</i>                | 10.1  | 8.4   | 9.8   | 0.9 | 0.2 | 0.9 | 0.1 |
| 1626 | 031g09 | BP087361 | MX033a06  | Predicted protein                                                  | <i>Caenorhabditis elegans</i>              | 16.4  | 12.1  | 16.6  | 0.7 | 0.1 | 0.8 | 0.3 |
| 1627 | 033g08 | BP094900 | MXL032a01 | Predicted protein                                                  | <i>Caenorhabditis elegans</i>              | 31.7  | 20.9  | 37.7  | 0.7 | 0.1 | 0.6 | 0.2 |
| 1628 | 008g10 | AV389567 | CM076d08  | Prefoldin 5                                                        | <i>Drosophila melanogaster</i>             | 6.8   | 7.0   | 9.0   | 1.0 | 0.3 | 0.8 | 0.2 |
| 1629 | 018e07 | AV618922 | LC001d08  | Prefoldin subunit 2                                                | <i>Homo sapiens</i>                        | 8.1   | 6.7   | 9.7   | 0.8 | 0.1 | 0.7 | 0.1 |
| 1630 | 150e08 | AV629050 | LCL050h10 | Pre-mRNA splicing factor                                           | <i>Homo sapiens</i>                        | 7.1   | 8.3   | 8.5   | 1.2 | 0.4 | 1.0 | 0.1 |
| 1631 | 022e04 | AV623922 | LC070e06  | Prenylated SNARE protein Ykt6p                                     | <i>Rattus norvegicus</i>                   | 17.5  | 15.2  | 14.3  | 0.9 | 0.1 | 1.1 | 0.3 |
| 1632 | 139h12 | AV623520 | LC065a11  | prenyltransferases                                                 | <i>Arabidopsis thaliana</i>                | 14.9  | 11.2  | 18.6  | 0.8 | 0.1 | 0.6 | 0.1 |
| 1633 | 001c03 | AV393459 | CL07h03   | Prenyltransferases                                                 | <i>Arabidopsis thaliana</i>                | 7.6   | 8.5   | 12.5  | 1.1 | 0.0 | 0.7 | 0.1 |
| 1634 | 103f08 | AV395373 | CL40e07   | Preprotein translocase                                             | <i>Phormidium laminosum</i>                | 6.8   | 7.0   | 11.0  | 1.0 | 0.2 | 0.7 | 0.2 |
| 1635 | 104a05 | AV395515 | CL43f12   | Preprotein translocase SECA subunit                                | <i>Phormidium laminosum</i>                | 9.5   | 11.4  | 11.2  | 1.3 | 0.4 | 1.0 | 0.1 |
| 1636 | 010g04 | AV633508 | HC021f04  | Prismane                                                           | <i>Thiobacillus ferrooxidans</i>           | 11.8  | 12.3  | 6.7   | 1.1 | 0.2 | 1.9 | 0.4 |
| 1637 | 036c05 | BP097969 | MXL084d07 | Prismane protein                                                   | <i>Thermotoga maritima</i>                 | 24.9  | 18.3  | 7.3   | 1.1 | 0.7 | 2.6 | 0.8 |
| 1638 | 034b12 | BP095429 | MXL041f08 | Prismane protein                                                   | <i>Thermotoga maritima</i>                 | 22.0  | 12.6  | 5.4   | 0.7 | 0.4 | 2.3 | 0.2 |
| 1639 | 133h07 | AV645279 | HCL100e11 | PRO0123                                                            | <i>Homo sapiens</i>                        | 62.2  | 81.1  | 46.9  | 1.3 | 0.1 | 1.8 | 0.5 |
| 1640 | 029f08 | BP383847 | LCL087c03 | Probable 3',5'-cyclic phosphodiesterase                            | <i>Homo sapiens</i>                        | 38.9  | 38.5  | 40.9  | 1.0 | 0.2 | 1.1 | 0.4 |
| 1641 | 168e07 | BP096567 | MXL060h06 | Probable 3',5'-cyclic phosphodiesterase                            | <i>Mus musculus</i>                        | 29.7  | 36.7  | 38.7  | 1.2 | 0.1 | 1.0 | 0.3 |
| 1642 | 008e10 | AV388420 | CM071g03  | Probable 40S ribosomal protein S15                                 | <i>Picea mariana</i>                       | 86.5  | 87.1  | 82.7  | 1.0 | 0.1 | 1.1 | 0.2 |
| 1643 | 001a08 | AV397598 | CL02g05   | Probable 60S ribosomal protein L15                                 | <i>Picea mariana</i>                       | 177.1 | 225.6 | 262.0 | 1.3 | 0.0 | 0.9 | 0.2 |
| 1644 | 036a07 | BP097657 | MXL079b08 | Probable ABC-type transport protein T23J7.80                       | <i>Arabidopsis thaliana</i>                | 11.3  | 15.8  | 17.3  | 1.5 | 0.3 | 0.9 | 0.1 |
| 1645 | 036g11 | BP098737 | MXL098c04 | Probable ABC-type transport protein T23J7.80                       | <i>Arabidopsis thaliana</i>                | 13.4  | 13.0  | 15.1  | 1.0 | 0.2 | 0.9 | 0.1 |
| 1646 | 035h11 | BP097558 | MXL077g02 | Probable ABC-type transport protein T23J7.80                       | <i>Arabidopsis thaliana</i>                | 7.9   | 10.8  | 13.1  | 1.4 | 0.2 | 0.8 | 0.1 |
| 1647 | 164f04 | BP094824 | MXL030d09 | Probable amidohydrolase                                            | <i>Pyrococcus horikoshii</i>               | 21.2  | 15.7  | 24.5  | 0.7 | 0.1 | 0.7 | 0.4 |
| 1648 | 012h04 | AV637553 | HC074e10  | Probable flavoprotein                                              | <i>Nostoc sp. PCC 7120</i>                 | 9.6   | 25.2  | 13.8  | 2.5 | 1.0 | 1.9 | 1.2 |
| 1649 | 012h09 | AV637669 | HC076a06  | Probable glutathione peroxidase                                    | <i>Saccharomyces cerevisiae</i>            | 11.1  | 12.3  | 15.4  | 1.1 | 0.1 | 0.9 | 0.5 |
| 1650 | 115e03 | BP098656 | MXL097a06 | Probable growth regulator                                          | <i>Arabidopsis thaliana</i>                | 19.1  | 14.3  | 16.7  | 0.8 | 0.0 | 0.9 | 0.1 |
| 1651 | 028h11 | AV630412 | LCL078e04 | Probable imbibition protein                                        | <i>Arabidopsis thaliana</i>                | 10.0  | 9.1   | 9.4   | 0.9 | 0.1 | 1.0 | 0.1 |
| 1652 | 158e02 | BP087654 | MX040d10  | Probable inorganic phosphate transport protein 1                   | <i>Pholiota nameko</i>                     | 11.9  | 5.5   | 8.2   | 0.5 | 0.1 | 0.7 | 0.2 |
| 1653 | 171g04 | BP098064 | MXL060h06 | Probable phosphoprotein phosphatase (EC 3.1.3.16) - apple tree     | <i>Malus x domestica</i>                   | 11.8  | 6.9   | 10.9  | 0.6 | 0.1 | 0.6 | 0.1 |
| 1654 | 029a11 | AV630578 | LCL081a05 | Probable phosphoribosylaminoimidazolecarboxamide formyltransferase | <i>Arabidopsis thaliana</i>                | 6.1   | 3.6   | 3.8   | 0.7 | 0.4 | 1.0 | 0.2 |
| 1655 | 122c12 | AV638133 | HC082d05  | Probable proteasome chain protein                                  | <i>Arabidopsis thaliana</i>                | 16.2  | 16.0  | 16.9  | 1.0 | 0.1 | 1.0 | 0.2 |
| 1656 | 002c10 | AV395127 | CL36f01   | Probable serine/threonine-specific protein kinase                  | <i>Arabidopsis thaliana</i>                | 12.1  | 12.0  | 12.4  | 1.0 | 0.2 | 1.1 | 0.3 |
| 1657 | 131e07 | AV644167 | HCL083c02 | Probable serine/threonine-specific protein kinase                  | <i>Arabidopsis thaliana</i>                | 16.0  | 14.4  | 17.3  | 0.9 | 0.0 | 0.8 | 0.2 |
| 1658 | 160g06 | BP089274 | MX204c03  | Probable transcription regulator                                   | <i>Schizosaccharomyces pombe</i>           | 10.2  | 9.3   | 12.5  | 1.0 | 0.4 | 0.8 | 0.4 |
| 1659 | 120g10 | AV636438 | HC059e02  | Probable ubiquitin-conjugating enzyme E2                           | <i>Picea mariana</i>                       | 18.4  | 24.9  | 14.7  | 1.3 | 0.5 | 1.7 | 0.8 |
| 1660 | 160d09 | BP088615 | MX065a06  | Probable uracil phosphoribosyl transferase                         | <i>Arabidopsis thaliana</i>                | 8.9   | 6.8   | 9.2   | 0.8 | 0.2 | 0.8 | 0.2 |
| 1661 | 008a02 | AV392596 | CM062g01  | Probable photosystemII chain X precursor                           | <i>Arabidopsis thaliana</i>                | 110.9 | 131.7 | 146.6 | 1.4 | 0.6 | 1.0 | 0.3 |
| 1662 | 021a04 | AV621795 | LC041a09  | Profilin                                                           | <i>Chlamydomonas reinhardtii</i>           | 34.6  | 36.1  | 35.4  | 1.1 | 0.1 | 1.0 | 0.2 |
| 1663 | 029f05 | AV630953 | LCL086g10 | Prohibitin                                                         | <i>Nicotiana tabacum</i>                   | 30.6  | 16.7  | 26.3  | 0.5 | 0.0 | 0.7 | 0.4 |
| 1664 | 012a07 | AV635912 | HC052i02  | Prohibitin 1                                                       | <i>Arabidopsis thaliana</i>                | 21.4  | 20.1  | 24.1  | 1.0 | 0.3 | 0.9 | 0.2 |
| 1665 | 136c07 | AV620622 | LC024e05  | Prolidase                                                          | <i>Suberites domuncula</i>                 | 74.0  | 77.0  | 64.4  | 1.1 | 0.1 | 1.3 | 0.5 |
| 1666 | 031f04 | BP087182 | MX027e06  | Proliferating cell nuclear antigen                                 | <i>Dunaliella tertiolecta</i>              | 27.2  | 22.5  | 27.0  | 0.8 | 0.1 | 0.8 | 0.1 |
| 1667 | 154b06 | AV630822 | LCL084g09 | Proline-rich mucin homolog                                         | <i>Mycobacterium tuberculosis</i>          | 24.2  | 19.3  | 24.5  | 0.8 | 0.2 | 0.8 | 0.1 |
| 1668 | 005h10 | AV388739 | CM031g06  | Prolyl 4-hydroxylase alpha subunit                                 | <i>Arabidopsis thaliana</i>                | 7.7   | 8.0   | 10.0  | 1.0 | 0.1 | 0.8 | 0.1 |
| 1669 | 105f08 | AV396673 | CL67c07   | Prolyl oligopeptidase                                              | <i>Bos taurus</i>                          | 7.0   | 6.0   | 6.9   | 1.0 | 0.5 | 0.9 | 0.2 |
| 1670 | 132g05 | AV644814 | HCL094b08 | Prolyl-tRNA synthetase (ProS)                                      | <i>Borrelia burgdorferi</i>                | 28.8  | 24.1  | 36.3  | 0.8 | 0.2 | 0.7 | 0.1 |
| 1671 | 169b02 | BP096832 | MXL065e12 | Protease 1                                                         | <i>Pneumocystis carinii f. sp. carinii</i> | 15.6  | 35.0  | 10.6  | 2.2 | 1.0 | 3.5 | 1.3 |
| 1672 | 170d02 | BP097389 | MXL074h05 | Protease 1                                                         | <i>Pneumocystis carinii f. sp. carinii</i> | 17.1  | 12.9  | 13.4  | 0.8 | 0.1 | 1.0 | 0.1 |
| 1673 | 137a01 | AV621095 | LC031b07  | Protease/reverse transcriptase                                     | <i>Volvox carteri</i>                      | 22.9  | 9.0   | 8.4   | 0.5 | 0.1 | 1.1 | 0.2 |
| 1674 | 023b04 | AV624688 | LC081c03  | Proteasome                                                         | <i>Arabidopsis thaliana</i>                | 31.7  | 31.3  | 35.1  | 1.0 | 0.2 | 0.9 | 0.4 |
| 1675 | 010f05 | AV633190 | HC017h01  | Proteasome 27 kD subunit                                           | <i>Spinacia oleracea</i>                   | 29.0  | 20.6  | 25.8  | 0.8 | 0.5 | 0.8 | 0.4 |
| 1676 | 120d11 | AV636035 | HC054c10  | Proteasome component C3                                            | <i>Oryza sativa</i>                        | 20.5  | 18.8  | 17.0  | 0.9 | 0.1 | 1.1 | 0.4 |
| 1677 | 005a05 | AV388151 | CM017d11  | Proteasome component C8                                            | <i>Spinacia oleracea</i>                   | 14.7  | 20.1  | 19.2  | 1.4 | 0.3 | 1.0 | 0.1 |
| 1678 | 163e11 | BP094364 | MXL022a08 | Proteasome subunit beta type 5                                     | <i>Spinacia oleracea</i>                   | 33.9  | 29.1  | 49.4  | 0.9 | 0.1 | 0.6 | 0.1 |
| 1679 | 162b06 | BP093519 | MXL009e09 | Proteasome subunit DD5                                             | <i>Cicer arietinum</i>                     | 22.9  | 20.9  | 17.7  | 0.9 | 0.3 | 1.3 | 0.5 |
| 1680 | 160d03 | BP088568 | MX063f06  | Protein C21                                                        | <i>Homo sapiens</i>                        | 11.8  | 13.2  | 11.1  | 1.1 | 0.2 | 1.2 | 0.3 |
| 1681 | 158b07 | BP087525 | MX036d07  | Protein disulfide isomerase RB60                                   | <i>Chlamydomonas reinhardtii</i>           | 19.4  | 24.4  | 18.5  | 1.2 | 0.3 | 1.5 | 0.9 |
| 1682 | 158f12 | BP087687 | MX041d10  | Protein disulfide isomerase RB60                                   | <i>Chlamydomonas reinhardtii</i>           | 31.6  | 28.7  | 35.1  | 0.9 | 0.2 | 0.8 | 0.2 |
| 1683 | 033d06 | BP094356 | MXL021h03 | Protein disulfide isomerase RB60                                   | <i>Chlamydomonas reinhardtii</i>           | 37.4  | 27.5  | 42.1  | 0.7 | 0.1 | 0.7 | 0.2 |
| 1684 | 031b09 | BP086606 | MX012g03  | Protein disulfide-isom                                             |                                            |       |       |       |     |     |     |     |

|      | A      | B        | C         | D                                                                | E                                 | F     | G     | H     | I   | J   | K   | L   |
|------|--------|----------|-----------|------------------------------------------------------------------|-----------------------------------|-------|-------|-------|-----|-----|-----|-----|
| 1710 | 116a01 | AV392057 | CM094a06  | Psiprotein                                                       | <i>Schizosaccharomyces pombe</i>  | 4.5   | 6.5   | 5.8   | 1.8 | 1.1 | 1.2 | 0.6 |
| 1711 | 167f11 | BP096153 | MXL053f10 | PsiA                                                             | <i>Streptococcus pneumoniae</i>   | 19.9  | 23.3  | 21.0  | 1.1 | 0.6 | 1.1 | 0.8 |
| 1712 | 109a11 | AV387806 | CM023f07  | Pta                                                              | <i>Mycobacterium tuberculosis</i> | 6.1   | 9.5   | 5.3   | 1.7 | 0.6 | 1.8 | 0.1 |
| 1713 | 132b12 | AV644544 | HCL090c10 | Pum gene product                                                 | <i>Drosophila melanogaster</i>    | 14.6  | 15.6  | 16.1  | 1.1 | 0.0 | 1.0 | 0.0 |
| 1714 | 012c09 | AV636486 | HC060b04  | Putative 16kDa membrane protein                                  | <i>Nicotiana tabacum</i>          | 165.2 | 98.6  | 165.2 | 0.6 | 0.0 | 0.6 | 0.1 |
| 1715 | 154f07 | AV631068 | LCL088c11 | Putative 3'-5' exonuclease                                       | <i>Arabidopsis thaliana</i>       | 28.5  | 22.1  | 28.3  | 0.8 | 0.1 | 0.8 | 0.1 |
| 1716 | 160d10 | BP088619 | MX065b01  | Putative 3-phosphoserine phosphatase                             | <i>Arabidopsis thaliana</i>       | 19.1  | 12.2  | 14.1  | 0.6 | 0.1 | 1.0 | 0.6 |
| 1717 | 027f08 | AV629327 | LCL056f09 | Putative 3-phosphoserine phosphatase                             | <i>Arabidopsis thaliana</i>       | 9.2   | 8.7   | 18.7  | 1.0 | 0.1 | 0.5 | 0.2 |
| 1718 | 001c04 | AV393516 | CL08e07   | Putative 40S ribosomal protein S12                               | <i>Fragaria x ananassa</i>        | 105.6 | 115.7 | 79.3  | 1.1 | 0.1 | 1.5 | 0.6 |
| 1719 | 101a09 | AV393344 | CL01e03   | Putative 40S ribosomal protein S12                               | <i>Fragaria x ananassa</i>        | 188.7 | 202.1 | 151.1 | 1.2 | 0.4 | 1.4 | 0.4 |
| 1720 | 124b11 | AV640046 | HCL009d01 | Putative 60 KD Chaperonin Beta subunit                           | <i>Oryza sativa</i>               | 54.0  | 32.9  | 21.0  | 0.6 | 0.3 | 1.6 | 0.6 |
| 1721 | 003c07 | AV396223 | CL58e07   | Putative 60S ribosomal protein L17                               | <i>Arabidopsis thaliana</i>       | 156.3 | 181.2 | 87.2  | 1.1 | 0.1 | 2.3 | 1.5 |
| 1722 | 027d11 | BP383842 | LCL054b09 | Putative ABC transporter                                         | <i>Arabidopsis thaliana</i>       | 4.9   | 4.0   | 3.7   | 0.8 | 0.1 | 1.1 | 0.4 |
| 1723 | 014e07 | BP383725 | HCL010f12 | Putative ABC transporter                                         | <i>Arabidopsis thaliana</i>       | 12.2  | 13.2  | 13.5  | 1.1 | 0.1 | 1.0 | 0.2 |
| 1724 | 035c10 | BP096922 | MXL067b05 | Putative ABC transporter                                         | <i>Oryza sativa</i>               | 9.9   | 7.4   | 9.7   | 0.8 | 0.1 | 0.8 | 0.1 |
| 1725 | 029d06 | BP383846 | LCL084f04 | Putative ABC transporter                                         | <i>Arabidopsis thaliana</i>       | 14.1  | 5.6   | 10.3  | 0.4 | 0.2 | 0.7 | 0.5 |
| 1726 | 003g07 | AV396456 | CL74f02   | Putative ABC transporter                                         | <i>Arabidopsis thaliana</i>       | 13.4  | 8.2   | 24.0  | 0.7 | 0.2 | 0.3 | 0.1 |
| 1727 | 034f11 | BP096164 | MXL053h05 | Putative ABC transporter                                         | <i>Chlamydomonas reinhardtii</i>  | 5.4   | 13.2  | 9.4   | 2.2 | 1.2 | 1.3 | 0.4 |
| 1728 | 024g12 | BP383835 | LCL017a03 | Putative ABC transporter ATPase                                  | <i>Arabidopsis thaliana</i>       | 41.5  | 42.5  | 41.5  | 1.0 | 0.2 | 1.1 | 0.6 |
| 1729 | 171f05 | BP098067 | MXL086d07 | Putative ABC transporter, Mrp1                                   | <i>Chlamydomonas reinhardtii</i>  | 25.2  | 23.2  | 33.8  | 1.1 | 1.1 | 0.9 | 0.9 |
| 1730 | 032g12 | BP093652 | MXL011e06 | Putative alcohol dehydrogenase/ribitoldehydrogenase              | <i>Oryza sativa</i>               | 18.6  | 10.5  | 14.2  | 0.6 | 0.1 | 0.7 | 0.1 |
| 1731 | 006g09 | AV390476 | CM046f04  | Putative alpha-carboxyltransferase                               | <i>Arabidopsis thaliana</i>       | 16.6  | 20.2  | 25.0  | 1.2 | 0.1 | 0.8 | 0.1 |
| 1732 | 012f02 | AV637100 | HC068f10  | Putative arginine N-methyltransferase                            | <i>Arabidopsis thaliana</i>       | 8.1   | 4.9   | 4.3   | 1.0 | 0.7 | 1.2 | 0.5 |
| 1733 | 115h04 | AV391712 | CM092g02  | Putative arginine N-methyltransferase                            | <i>Arabidopsis thaliana</i>       | 11.9  | 5.9   | 5.8   | 0.5 | 0.1 | 1.0 | 0.2 |
| 1734 | 165d09 | BP095201 | MXL037h04 | Putative aspartate aminotransferase                              | <i>Arabidopsis thaliana</i>       | 7.0   | 8.0   | 8.9   | 1.2 | 0.1 | 0.9 | 0.1 |
| 1735 | 029b08 | AV630642 | LCL082a01 | Putative aspartate-tRNA ligase                                   | <i>Arabidopsis thaliana</i>       | 13.3  | 7.5   | 10.6  | 0.6 | 0.1 | 0.7 | 0.0 |
| 1736 | 127h07 | AV642050 | HCL044e11 | Putative aspartic protease                                       | <i>Brassica oleracea</i>          | 14.1  | 32.3  | 29.7  | 2.3 | 0.9 | 1.1 | 0.4 |
| 1737 | 017b07 | AV642923 | HCL060e12 | Putative ATP binding protein                                     | <i>Arabidopsis thaliana</i>       | 6.4   | 6.0   | 6.1   | 0.9 | 0.2 | 1.0 | 0.2 |
| 1738 | 165d07 | BP095187 | MXL037e04 | Putative ATPase                                                  | <i>Arabidopsis thaliana</i>       | 8.3   | 7.1   | 9.7   | 0.9 | 0.2 | 0.8 | 0.2 |
| 1739 | 156c05 | AV631789 | LCL099h06 | Putative ATPase (ISW2-like)                                      | <i>Arabidopsis thaliana</i>       | 11.0  | 15.3  | 12.0  | 1.7 | 1.0 | 1.3 | 0.4 |
| 1740 | 023d01 | AV624974 | LCL085c02 | Putative ATP-dependent citrate lyase                             | <i>Chlorella protothecoides</i>   | 11.9  | 18.2  | 10.0  | 1.5 | 0.2 | 2.3 | 1.3 |
| 1741 | 125f10 | AV640753 | HCL021h01 | Putative ATP-dependent RNA helicase                              | <i>Arabidopsis thaliana</i>       | 97.2  | 76.9  | 65.3  | 0.8 | 0.0 | 1.2 | 0.1 |
| 1742 | 166g08 | AV386592 | CM003c09  | Putative ATP-dependent RNA helicase                              | <i>Schizosaccharomyces pombe</i>  | 13.6  | 11.6  | 12.0  | 0.9 | 0.3 | 1.0 | 0.2 |
| 1743 | 168d03 | BP096462 | MXL059b05 | Putative ATP-dependent RNA helicase A                            | <i>Arabidopsis thaliana</i>       | 19.4  | 17.0  | 23.4  | 0.9 | 0.1 | 0.8 | 0.2 |
| 1744 | 109d04 | AV388136 | CM025f05  | Putative autophagocytosis protein                                | <i>Schizosaccharomyces pombe</i>  | 7.1   | 9.9   | 10.1  | 1.4 | 0.4 | 1.2 | 0.7 |
| 1745 | 125h05 | AV640833 | HCL023b03 | Putative beta-amylase                                            | <i>Arabidopsis thaliana</i>       | 14.2  | 14.8  | 13.7  | 1.0 | 0.2 | 1.1 | 0.4 |
| 1746 | 127e08 | AV641869 | HCL041f04 | Putative branched-chain amino acidaminotransferase               | <i>Arabidopsis thaliana</i>       | 8.0   | 7.1   | 7.3   | 0.9 | 0.1 | 1.0 | 0.2 |
| 1747 | 026b03 | AV628099 | LCL036f12 | Putative Ca <sup>2+</sup> dependent protein kinase               | <i>Arabidopsis thaliana</i>       | 19.7  | 20.9  | 22.4  | 1.1 | 0.3 | 1.0 | 0.3 |
| 1748 | 116d01 | AV392697 | CM098f03  | Putative carbamoyl phosphate synthetase                          | <i>Oryza sativa</i>               | 7.4   | 25.0  | 11.1  | 3.3 | 0.8 | 2.3 | 0.2 |
| 1749 | 136e02 | AV620724 | LC026a05  | Putative carboxyphosphoenolpyruvate mutase                       | <i>Arabidopsis thaliana</i>       | 18.5  | 18.0  | 22.9  | 1.0 | 0.1 | 0.8 | 0.2 |
| 1750 | 142d12 | AV625178 | LC088h09  | Putative carboxyphosphoenolpyruvate mutase                       | <i>Arabidopsis thaliana</i>       | 38.6  | 58.1  | 47.3  | 1.5 | 0.1 | 1.3 | 0.5 |
| 1751 | 143c04 | BP098797 | MXL099c09 | Putative casein kinase I                                         | <i>Arabidopsis thaliana</i>       | 18.8  | 21.0  | 18.9  | 1.1 | 0.0 | 1.1 | 0.1 |
| 1752 | 170a06 | BP097208 | MXL071g11 | Putative chaperonin                                              | <i>Arabidopsis thaliana</i>       | 15.8  | 16.7  | 9.8   | 1.2 | 0.4 | 2.5 | 1.6 |
| 1753 | 009g12 | AV392905 | CM100c04  | putative chelatase subunit                                       | <i>Oryza sativa</i>               | 15.3  | 4.3   | 13.1  | 0.3 | 0.1 | 0.3 | 0.1 |
| 1754 | 127e01 | AV641814 | HCL040g04 | Putative chlorophyll A-B binding protein                         | <i>Arabidopsis thaliana</i>       | 18.8  | 12.0  | 26.8  | 0.7 | 0.2 | 0.4 | 0.1 |
| 1755 | 022d01 | AV623758 | LC068c06  | Putative chlorophyll synthetase                                  | <i>Arabidopsis thaliana</i>       | 29.2  | 16.2  | 14.6  | 0.5 | 0.2 | 1.1 | 0.2 |
| 1756 | 009b05 | AV390355 | CM084e03  | Putative chloroplast 50S ribosomal proteinL28                    | <i>Arabidopsis thaliana</i>       | 254.9 | 196.3 | 238.4 | 0.8 | 0.2 | 0.9 | 0.4 |
| 1757 | 130b02 | AV643248 | HCL066d02 | Putative cinnamyl alcohol dehydrogenase                          | <i>Malus domestica</i>            | 5.3   | 4.6   | 4.4   | 0.9 | 0.2 | 1.1 | 0.4 |
| 1758 | 161d10 | BP098869 | MXL100e03 | Putative cinnamyl alcohol dehydrogenase                          | <i>Arabidopsis thaliana</i>       | 46.2  | 29.8  | 46.7  | 0.7 | 0.2 | 0.7 | 0.2 |
| 1759 | 020a08 | AV620729 | LC026a12  | Putative citrate synthase                                        | <i>Arabidopsis thaliana</i>       | 42.2  | 28.9  | 28.5  | 0.7 | 0.1 | 1.1 | 0.3 |
| 1760 | 036e01 | BP098263 | MXL090d10 | Putative clathrin heavy chain                                    | <i>Arabidopsis thaliana</i>       | 19.0  | 24.2  | 15.2  | 1.3 | 0.1 | 1.7 | 0.7 |
| 1761 | 160f12 | BP098188 | MX202e06  | Putative clathrin heavy chain                                    | <i>Arabidopsis thaliana</i>       | 18.0  | 21.7  | 18.5  | 1.2 | 0.2 | 1.2 | 0.2 |
| 1762 | 144e11 | AV626297 | LCL006b03 | Putative cleavage and polyadenylation specificityfactor          | <i>Schizosaccharomyces pombe</i>  | 17.1  | 15.1  | 18.0  | 1.0 | 0.4 | 0.9 | 0.2 |
| 1763 | 127a08 | AV641614 | HCL037d10 | Putative CMF receptor                                            | <i>Dictyostellium discoideum</i>  | 11.3  | 9.5   | 9.1   | 0.9 | 0.2 | 1.0 | 0.2 |
| 1764 | 105a12 | AV396271 | CL57e10   | Putative coatamer alpha subunit homolog                          | <i>Arabidopsis thaliana</i>       | 132.8 | 192.3 | 174.5 | 1.5 | 0.1 | 1.1 | 0.2 |
| 1765 | 034d10 | BP095771 | MXL047b06 | Putative coatamer alpha subunit homolog                          | <i>Arabidopsis thaliana</i>       | 3.1   | 2.4   | 2.8   | 0.8 | 0.1 | 0.8 | 0.2 |
| 1766 | 021a09 | AV621916 | LC042e12  | Putative coatamer epsilon subunit                                | <i>Arabidopsis thaliana</i>       | 17.6  | 19.0  | 14.7  | 1.1 | 0.3 | 1.3 | 0.1 |
| 1767 | 017h04 | AV643858 | HCL077c08 | Putative coatamer protein complex, subunit beta 2                | <i>Arabidopsis thaliana</i>       | 14.2  | 13.1  | 14.5  | 0.9 | 0.1 | 1.0 | 0.4 |
| 1768 | 021c11 | AV622189 | LC046c12  | Putative copia-like transposable element                         | <i>Arabidopsis thaliana</i>       | 25.6  | 26.0  | 30.0  | 1.0 | 0.3 | 0.8 | 0.2 |
| 1769 | 140g09 | AV624088 | LC072g09  | Putative culin-like 1 protein                                    | <i>Arabidopsis thaliana</i>       | 18.5  | 20.2  | 21.4  | 1.1 | 0.2 | 1.0 | 0.2 |
| 1770 | 024g08 | AV626842 | LCL016d12 | Putative culin-like 1 protein                                    | <i>Arabidopsis thaliana</i>       | 12.9  | 17.7  | 18.6  | 1.4 | 0.2 | 1.0 | 0.2 |
| 1771 | 008h12 | AV390515 | CM080f07  | Putative culin-like 1 protein                                    | <i>Arabidopsis thaliana</i>       | 8.1   | 8.8   | 10.1  | 1.1 | 0.2 | 0.9 | 0.3 |
| 1772 | 144d05 | AV626244 | LCL005a05 | Putative cyclin homolog                                          | <i>Oryza sativa</i>               | 153.7 | 127.7 | 149.3 | 0.9 | 0.4 | 1.0 | 0.5 |
| 1773 | 172e10 | BP098431 | MXL093b10 | Putative cyclophilin type peptidyl-prolyl cis-trans isomerase    | <i>Mus musculus</i>               | 56.7  | 39.6  | 67.2  | 0.7 | 0.1 | 0.7 | 0.3 |
| 1774 | 001g03 | AV394359 | CL21a06   | Putative Cys3His zinc finger protein                             | <i>Arabidopsis thaliana</i>       | 3.3   | 3.7   | 3.5   | 1.2 | 0.4 | 1.2 | 0.7 |
| 1775 | 103f12 | AV395388 | CL40g06   | Putative Cys3His zinc finger protein                             | <i>Arabidopsis thaliana</i>       | 10.7  | 7.8   | 9.9   | 0.7 | 0.2 | 0.8 | 0.2 |
| 1776 | 008d01 | AV397359 | CM068h01  | Putative deoxyribonuclease                                       | <i>Salmonella enterica</i>        | 3.5   | 5.8   | 4.3   | 1.7 | 0.3 | 1.4 | 0.4 |
| 1777 | 025d12 | AV627419 | LCL026d09 | Putative dihydrodipicolinate synthase                            | <i>Arabidopsis thaliana</i>       | 33.0  | 21.5  | 20.3  | 0.7 | 0.2 | 1.1 | 0.5 |
| 1778 | 035d02 | BP096959 | MXL067g06 | Putative dihydroxy-acid dehydratase, mitochondrial               | <i>Arabidopsis thaliana</i>       | 29.8  | 18.6  | 12.5  | 0.6 | 0.2 | 1.5 | 0.5 |
| 1779 | 004h04 | AV387377 | CM014h04  | Putative dihydroxy-aciddehydratase                               | <i>Schizosaccharomyces pombe</i>  | 23.6  | 17.8  | 14.8  | 0.8 | 0.4 | 1.2 | 0.4 |
| 1780 | 122c07 | AV638044 | HC081b04  | Putative dihydroxy-aciddehydratase                               | <i>Schizosaccharomyces pombe</i>  | 35.4  | 25.0  | 23.7  | 0.7 | 0.0 | 1.1 | 0.4 |
| 1781 | 120g03 | AV636378 | HC058f12  | Putative dihydropolipoamideacetyltransferase                     | <i>Arabidopsis thaliana</i>       | 8.8   | 9.0   | 6.7   | 1.0 | 0.3 | 1.3 | 0.4 |
| 1782 | 021g08 | AV622903 | LC056c12  | Putative DNA-binding protein                                     | <i>Arabidopsis thaliana</i>       | 11.8  | 7.8   | 7.2   | 0.7 | 0.3 | 1.1 | 0.2 |
| 1783 | 006d04 | AV389765 | CM039f07  | Putative DNA-directed RNA polymerase III C11 subunit             | <i>Homo sapiens</i>               | 4.2   | 4.3   | 3.8   | 1.0 | 0.2 | 1.2 | 0.3 |
| 1784 | 119g04 | AV635351 | HC045c07  | Putative D-ribulose-5-phosphate                                  | <i>Arabidopsis thaliana</i>       | 7.9   | 5.6   | 4.1   | 0.7 | 0.2 | 1.5 | 0.6 |
| 1785 | 136c04 | AV620603 | LC024b12  | putative dTDP-6-deoxy-L-mannose-dehydrogenase                    | <i>Arabidopsis thaliana</i>       | 10.0  | 8.3   | 9.4   | 0.8 | 0.2 | 0.9 | 0.2 |
| 1786 | 004c09 | AV386851 | CM005a03  | Putative dTDP-glucose 4-6-dehydratase                            | <i>Arabidopsis thaliana</i>       | 25.1  | 32.4  | 27.6  | 1.3 | 0.2 | 1.4 | 0.5 |
| 1787 | 022d05 | AV623773 | LC068d12  | Putative E1protein                                               | <i>Arabidopsis thaliana</i>       | 17.9  | 16.7  | 18.6  | 0.9 | 0.2 | 1.0 | 0.4 |
| 1788 | 011h05 | AV635679 | HC049e01  | Putative electron transfer flavoprotein ubiquinoneoxidoreductase | <i>Arabidopsis thaliana</i>       | 7.1   | 7.0   | 6.1   | 1.0 | 0.2 | 1.2 | 0.3 |
| 1789 | 002h05 | AV395911 | CL51d05   | Putative elongation factor 3                                     | <i>Schizosaccharomyces pombe</i>  | 115.8 | 134.1 | 107.9 | 1.0 | 0.4 | 1.5 | 1.2 |
| 1790 | 159a02 | BP087719 | MX042c03  | Putative enolase                                                 | <i>Arabidopsis thaliana</i>       | 70.3  | 60.2  | 38.2  | 0.9 | 0.4 |     |     |

|      | A      | B        | C         | D                                                                    | E                                | F     | G     | H     | I   | J   | K   | L   |
|------|--------|----------|-----------|----------------------------------------------------------------------|----------------------------------|-------|-------|-------|-----|-----|-----|-----|
| 1817 | 028e06 | AV630075 | LCL072e09 | Putative kinetochore protein                                         | <i>Hordeum vulgare</i>           | 35.5  | 15.2  | 15.0  | 0.5 | 0.3 | 1.0 | 0.5 |
| 1818 | 128g10 | AV642553 | HCL053g11 | Putative leucyl tRNA synthetase                                      | <i>Arabidopsis thaliana</i>      | 11.7  | 12.5  | 10.3  | 1.1 | 0.4 | 1.2 | 0.4 |
| 1819 | 003e07 | AV396762 | CL66g03   | Putative leucyl tRNA synthetase                                      | <i>Arabidopsis thaliana</i>      | 11.6  | 8.8   | 15.5  | 0.8 | 0.0 | 0.6 | 0.1 |
| 1820 | 114e11 | AV388593 | CM078c08  | Putative leucyl-tRNA synthetase                                      | <i>Arabidopsis thaliana</i>      | 10.9  | 9.8   | 7.3   | 0.9 | 0.1 | 1.4 | 0.2 |
| 1821 | 029a08 | AV630526 | LCL080c05 | Putative leucyl-tRNA synthetase                                      | <i>Arabidopsis thaliana</i>      | 36.5  | 24.9  | 32.4  | 0.7 | 0.0 | 0.8 | 0.2 |
| 1822 | 024h07 | AV626896 | LCL017f05 | Putative leucyl-tRNA synthetase                                      | <i>Arabidopsis thaliana</i>      | 22.6  | 14.4  | 18.8  | 0.6 | 0.2 | 0.8 | 0.1 |
| 1823 | 132c08 | AV644631 | HCL091e05 | Putative lupus LA proteins                                           | <i>Caenorhabditis elegans</i>    | 17.8  | 11.2  | 13.4  | 0.6 | 0.2 | 0.9 | 0.3 |
| 1824 | 124a02 | AV639908 | HCL007a07 | Putative lysozyme C                                                  | <i>Dictyostelium discoideum</i>  | 16.9  | 15.2  | 19.1  | 0.9 | 0.1 | 0.8 | 0.2 |
| 1825 | 007c11 | AV391435 | CM054d11  | Putative malonyl-CoA acyl carrier protein transacylase               | <i>Arabidopsis thaliana</i>      | 30.7  | 38.1  | 30.8  | 1.3 | 0.1 | 1.2 | 0.0 |
| 1826 | 018a11 | AV644130 | HCL082e08 | Putative MAP kinase                                                  | <i>Arabidopsis thaliana</i>      | 13.7  | 10.2  | 11.6  | 0.8 | 0.5 | 1.0 | 0.6 |
| 1827 | 023g02 | AV626030 | LCL001c10 | Putative MAP kinase phosphatase                                      | <i>Arabidopsis thaliana</i>      | 4.2   | 3.5   | 3.7   | 0.8 | 0.2 | 0.9 | 0.3 |
| 1828 | 009a06 | AV390232 | CM082c12  | Putative membrane protein                                            | <i>Arabidopsis thaliana</i>      | 8.2   | 7.6   | 7.4   | 0.9 | 0.1 | 1.1 | 0.3 |
| 1829 | 010b09 | AV632333 | HCO06h03  | Putative membrane protein                                            | <i>Arabidopsis thaliana</i>      | 4.5   | 5.1   | 5.4   | 1.1 | 0.1 | 1.0 | 0.2 |
| 1830 | 004b04 | AV386616 | CM003d12  | Putative membrane protein                                            | <i>Yersinia pestis</i>           | 249.6 | 168.6 | 204.0 | 0.7 | 0.0 | 0.8 | 0.1 |
| 1831 | 025a02 | AV626943 | LCL018e08 | Putative membrane related protein                                    | <i>Arabidopsis thaliana</i>      | 22.5  | 17.3  | 19.0  | 0.8 | 0.4 | 1.0 | 0.5 |
| 1832 | 031e07 | BP086999 | MX022e06  | Putative methionine aminopeptidase                                   | <i>Arabidopsis thaliana</i>      | 11.2  | 6.0   | 8.6   | 0.5 | 0.1 | 0.7 | 0.1 |
| 1833 | 023c01 | AV624819 | LCO83b11  | Putative methyltransferase                                           | <i>Streptomyces coelicolor</i>   | 15.3  | 20.0  | 13.6  | 1.3 | 0.3 | 1.6 | 0.5 |
| 1834 | 158f08 | BP087681 | MX041c07  | Putative microtubule-associated protein                              | <i>Arabidopsis thaliana</i>      | 14.0  | 24.4  | 27.4  | 2.2 | 1.6 | 0.9 | 0.4 |
| 1835 | 012b09 | AV636272 | HCO57c10  | Putative microtubule-associated protein                              | <i>Arabidopsis thaliana</i>      | 7.8   | 17.7  | 18.9  | 2.3 | 1.9 | 0.9 | 0.6 |
| 1836 | 168a01 | BP096261 | MXL05f02  | Putative mitochondrial matrix protein                                | <i>Chlamydomonas reinhardtii</i> | 7.9   | 35.3  | 13.7  | 4.8 | 1.5 | 3.4 | 2.0 |
| 1837 | 022e02 | AV623887 | LC070a11  | Putative mitochondrial matrix protein                                | <i>Chlamydomonas reinhardtii</i> | 9.0   | 75.6  | 46.5  | 8.6 | 1.9 | 1.6 | 0.3 |
| 1838 | 025f01 | AV627578 | LCL028h09 | Putative mitochondrial matrix protein                                | <i>Chlamydomonas reinhardtii</i> | 7.4   | 63.1  | 38.9  | 9.0 | 4.4 | 1.6 | 0.5 |
| 1839 | 117g08 | AV633102 | HCO16g06  | Putative mitochondrial processingpeptidase                           | <i>Arabidopsis thaliana</i>      | 34.6  | 32.1  | 32.3  | 0.9 | 0.2 | 1.0 | 0.2 |
| 1840 | 144f07 | AV626314 | LCL006g02 | Putative MO25 protein                                                | <i>Chlorella protothecoides</i>  | 11.1  | 8.5   | 7.8   | 0.8 | 0.1 | 1.1 | 0.3 |
| 1841 | 151f12 | AV629629 | LCL062c09 | Putative mRNA capping enzyme                                         | <i>Arabidopsis thaliana</i>      | 11.2  | 10.1  | 9.2   | 0.9 | 0.3 | 1.2 | 0.5 |
| 1842 | 029e12 | AV630933 | LCL086e05 | Putative mRNA capping enzyme                                         | <i>Arabidopsis thaliana</i>      | 4.5   | 5.4   | 5.1   | 1.2 | 0.2 | 1.1 | 0.2 |
| 1843 | 151g02 | AV629634 | LCL062d08 | Putative mRNA capping enzyme                                         | <i>Arabidopsis thaliana</i>      | 11.3  | 10.7  | 11.3  | 0.9 | 0.1 | 1.0 | 0.1 |
| 1844 | 014e06 | AV640112 | HCL010f04 | Putative MSF transporter                                             | <i>Schizosaccharomyces pombe</i> | 12.0  | 12.2  | 13.0  | 1.1 | 0.3 | 1.0 | 0.4 |
| 1845 | 025a03 | AV626956 | LCL018g07 | Putative multispanning membrane protein                              | <i>Arabidopsis thaliana</i>      | 17.6  | 15.3  | 17.9  | 0.9 | 0.2 | 0.9 | 0.1 |
| 1846 | 031h04 | BP087425 | MX034c06  | Putative mutT protein                                                | <i>Arabidopsis thaliana</i>      | 10.3  | 9.0   | 9.2   | 0.9 | 0.2 | 1.0 | 0.3 |
| 1847 | 027f10 | BP383843 | LCL056h12 | Putative Na <sup>+</sup> -dependent inorganic phosphatocotransporter | <i>Arabidopsis thaliana</i>      | 15.8  | 10.2  | 11.2  | 0.7 | 0.1 | 0.9 | 0.1 |
| 1848 | 017d12 | AV643243 | HCL066c07 | Putative NAD(P)H steroid dehydrogenase                               | <i>Mus musculus</i>              | 7.1   | 5.1   | 6.9   | 0.7 | 0.2 | 0.8 | 0.5 |
| 1849 | 013a12 | AV637960 | HCO80a01  | Putative NADH-ubiquinone oxidoreductase                              | <i>Arabidopsis thaliana</i>      | 19.3  | 15.3  | 14.0  | 0.8 | 0.2 | 1.1 | 0.2 |
| 1850 | 003h09 | AV397339 | CL80f02   | Putative nonsense-mediated mRNA decayprotein                         | <i>Arabidopsis thaliana</i>      | 9.0   | 5.8   | 13.8  | 0.6 | 0.2 | 0.7 | 0.5 |
| 1851 | 007c02 | AV391296 | CM053a08  | Putative O-acetylserine(thiol)ylase precursor                        | <i>Chlamydomonas reinhardtii</i> | 12.6  | 17.7  | 13.1  | 1.4 | 0.2 | 1.4 | 0.3 |
| 1852 | 014c12 | AV639929 | HCL007d03 | Putative oxysterol-binding protein                                   | <i>Arabidopsis thaliana</i>      | 5.9   | 4.3   | 5.4   | 0.7 | 0.1 | 0.8 | 0.2 |
| 1853 | 117c09 | AV632486 | HCO08g12  | Putative peptidyl-prolyl cis-trans isomerase                         | <i>Arabidopsis thaliana</i>      | 5.3   | 4.9   | 4.9   | 0.9 | 0.2 | 1.1 | 0.4 |
| 1854 | 169h08 | BP097165 | MXL071b05 | Putative periplasmic protein                                         | <i>Campylobacter jejuni</i>      | 5.1   | 4.1   | 7.5   | 0.6 | 0.5 | 0.8 | 0.9 |
| 1855 | 010d10 | AV632747 | HCO12a12  | Putative peroxisomal membrane carrier protein                        | <i>Arabidopsis thaliana</i>      | 32.1  | 20.0  | 27.8  | 0.6 | 0.1 | 0.7 | 0.0 |
| 1856 | 169a03 | BP096772 | MXL064f05 | Putative P-glycoprotein-like protein                                 | <i>Arabidopsis thaliana</i>      | 19.3  | 19.1  | 13.6  | 1.0 | 0.1 | 1.8 | 1.0 |
| 1857 | 145b11 | AV626556 | LCL011c03 | Putative phosphatidatecytidyltransferase                             | <i>Arabidopsis thaliana</i>      | 21.8  | 24.7  | 20.2  | 1.1 | 0.1 | 1.2 | 0.3 |
| 1858 | 023a03 | AV624523 | LC078h05  | Putative phosphoglyceride transfer protein                           | <i>Arabidopsis thaliana</i>      | 19.1  | 13.8  | 14.5  | 0.7 | 0.1 | 0.9 | 0.3 |
| 1859 | 021h04 | AV623015 | LC057g11  | Putative phospholipase A2                                            | <i>Oryza sativa</i>              | 8.7   | 9.0   | 11.6  | 1.0 | 0.3 | 0.8 | 0.1 |
| 1860 | 027c08 | AV629090 | LCL051h02 | Putative phosphoprotein phosphatase                                  | <i>Arabidopsis thaliana</i>      | 2.4   | 2.2   | 1.8   | 1.0 | 0.3 | 1.2 | 0.1 |
| 1861 | 115d06 | AV390983 | CM087c06  | Putative phosphoribosylaminoimidazole carboxamideformyltransferase   | <i>Arabidopsis thaliana</i>      | 7.5   | 4.8   | 3.5   | 0.8 | 0.4 | 1.4 | 0.2 |
| 1862 | 163g12 | BP094522 | MXL024d07 | Putative phosphoribosylformylglycinamidesynthase                     | <i>Arabidopsis thaliana</i>      | 14.8  | 10.8  | 17.8  | 0.8 | 0.1 | 0.7 | 0.3 |
| 1863 | 014c08 | AV639890 | HCL006g03 | Putative phospho-ser/thr phosphatase                                 | <i>Arabidopsis thaliana</i>      | 7.5   | 9.0   | 8.5   | 1.2 | 0.3 | 1.1 | 0.4 |
| 1864 | 029h01 | AV631148 | LCL089e07 | Putative plasma membrane ion permease                                | <i>Schizosaccharomyces pombe</i> | 15.3  | 12.2  | 22.1  | 0.8 | 0.1 | 0.6 | 0.1 |
| 1865 | 169b07 | BP096856 | MXL068a02 | Putative poly(A) polymerase                                          | <i>Arabidopsis thaliana</i>      | 16.8  | 16.9  | 13.9  | 1.1 | 0.4 | 1.3 | 0.5 |
| 1866 | 027d08 | AV629182 | LCL053g09 | Putative poly(A) polymerase                                          | <i>Arabidopsis thaliana</i>      | 10.1  | 7.6   | 9.5   | 0.7 | 0.1 | 0.9 | 0.5 |
| 1867 | 150a06 | AV628790 | LCL047b07 | Putative pre-mRNA processing protein                                 | <i>Arabidopsis thaliana</i>      | 9.7   | 7.7   | 7.3   | 0.8 | 0.3 | 1.1 | 0.3 |
| 1868 | 154a03 | AV630754 | LCL083g11 | Putative pre-mRNA splicing factor                                    | <i>Arabidopsis thaliana</i>      | 16.7  | 12.8  | 13.1  | 0.8 | 0.2 | 1.0 | 0.3 |
| 1869 | 161b11 | BP092986 | MXL001g10 | Putative protein                                                     | <i>Arabidopsis thaliana</i>      | 10.0  | 11.4  | 7.5   | 1.2 | 0.4 | 1.9 | 1.0 |
| 1870 | 036c12 | BP098075 | MXL086e08 | Putative protein                                                     | <i>Arabidopsis thaliana</i>      | 1.9   | 1.8   | 1.4   | 1.0 | 0.4 | 1.7 | 1.0 |
| 1871 | 113c10 | AV392928 | CM065g03  | Putative protein                                                     | <i>Arabidopsis thaliana</i>      | 9.6   | 16.5  | 10.3  | 1.7 | 0.6 | 1.6 | 0.7 |
| 1872 | 005h01 | AV388548 | CM030b08  | Putative protein                                                     | <i>Arabidopsis thaliana</i>      | 10.8  | 21.9  | 14.3  | 2.0 | 0.2 | 1.5 | 0.4 |
| 1873 | 140e11 | AV623916 | LC070d12  | Putative protein                                                     | <i>Arabidopsis thaliana</i>      | 7.2   | 32.8  | 22.8  | 4.7 | 1.5 | 1.5 | 0.2 |
| 1874 | 121b01 | AV636802 | HCO64d03  | Putative protein                                                     | <i>Arabidopsis thaliana</i>      | 10.3  | 10.9  | 8.0   | 1.0 | 0.3 | 1.4 | 0.8 |
| 1875 | 022b10 | AV623502 | LC064g06  | Putative protein                                                     | <i>Arabidopsis thaliana</i>      | 17.8  | 52.2  | 42.3  | 3.0 | 0.5 | 1.4 | 0.5 |
| 1876 | 109d01 | AV388077 | CM025d09  | Putative protein                                                     | <i>Arabidopsis thaliana</i>      | 37.6  | 67.0  | 55.4  | 1.8 | 0.2 | 1.4 | 0.4 |
| 1877 | 149e05 | AV628519 | LCL043b07 | Putative protein                                                     | <i>Arabidopsis thaliana</i>      | 6.9   | 11.4  | 8.3   | 1.7 | 0.3 | 1.4 | 0.2 |
| 1878 | 141e05 | AV624552 | LC079c10  | Putative protein                                                     | <i>Arabidopsis thaliana</i>      | 10.9  | 15.8  | 11.9  | 1.5 | 0.2 | 1.3 | 0.2 |
| 1879 | 007h03 | AV392433 | CM061f07  | Putative protein                                                     | <i>Arabidopsis thaliana</i>      | 12.2  | 13.4  | 10.5  | 1.1 | 0.1 | 1.3 | 0.1 |
| 1880 | 025c08 | AV627250 | LCL023g02 | Putative protein                                                     | <i>Arabidopsis thaliana</i>      | 18.6  | 20.1  | 18.8  | 1.1 | 0.1 | 1.3 | 0.7 |
| 1881 | 145b02 | AV626514 | LCL010d08 | Putative protein                                                     | <i>Arabidopsis thaliana</i>      | 10.6  | 14.2  | 11.5  | 1.3 | 0.1 | 1.2 | 0.1 |
| 1882 | 010e04 | AV632931 | HCO14e06  | Putative protein                                                     | <i>Arabidopsis thaliana</i>      | 17.1  | 19.6  | 16.5  | 1.3 | 0.5 | 1.2 | 0.3 |
| 1883 | 007g02 | AV392236 | CM059e02  | Putative protein                                                     | <i>Caenorhabditis elegans</i>    | 6.4   | 8.2   | 6.9   | 1.4 | 0.3 | 1.2 | 0.2 |
| 1884 | 106f04 | AV397836 | CM002c07  | Putative protein                                                     | <i>Arabidopsis thaliana</i>      | 9.9   | 6.1   | 5.1   | 0.6 | 0.1 | 1.2 | 0.2 |
| 1885 | 148f04 | AV628116 | LCL036h12 | Putative protein                                                     | <i>Arabidopsis thaliana</i>      | 9.4   | 18.5  | 16.0  | 2.1 | 0.6 | 1.2 | 0.2 |
| 1886 | 020a04 | AV620671 | LC025c07  | Putative protein                                                     | <i>Arabidopsis thaliana</i>      | 35.6  | 36.1  | 31.0  | 1.0 | 0.0 | 1.2 | 0.2 |
| 1887 | 125f08 | AV640743 | HCL021f08 | Putative protein                                                     | <i>Arabidopsis thaliana</i>      | 18.6  | 16.9  | 16.3  | 1.0 | 0.3 | 1.1 | 0.4 |
| 1888 | 012a02 | AV635784 | HCO65h05  | Putative protein                                                     | <i>Arabidopsis thaliana</i>      | 16.0  | 20.2  | 18.9  | 1.4 | 0.6 | 1.1 | 0.4 |
| 1889 | 113d06 | AV393088 | CM067b05  | Putative protein                                                     | <i>Arabidopsis thaliana</i>      | 4.3   | 4.6   | 4.1   | 1.2 | 0.5 | 1.1 | 0.1 |
| 1890 | 027a11 | AV628803 | LCL047c12 | Putative protein                                                     | <i>Arabidopsis thaliana</i>      | 7.3   | 7.0   | 7.0   | 1.0 | 0.2 | 1.1 | 0.6 |
| 1891 | 007e07 | AV391860 | CM057a08  | Putative protein                                                     | <i>Arabidopsis thaliana</i>      | 19.6  | 24.0  | 21.3  | 1.3 | 0.3 | 1.1 | 0.1 |
| 1892 | 025h06 | AV627903 | LCL039f08 | Putative protein                                                     | <i>Arabidopsis thaliana</i>      | 11.3  | 8.8   | 9.0   | 0.8 | 0.2 | 1.1 | 0.6 |
| 1893 | 164d11 | BP094749 | MXL028f11 | Putative protein                                                     | <i>Arabidopsis thaliana</i>      | 25.7  | 18.4  | 20.9  | 0.8 | 0.2 | 1.1 | 0.5 |
| 1894 | 032h08 | BP093745 | MXL013a06 | Putative protein                                                     | <i>Arabidopsis thaliana</i>      | 20.5  | 24.7  | 22.0  | 1.2 | 0.1 | 1.1 | 0.1 |
| 1895 | 020h10 | AV621679 | LC039e10  | Putative protein                                                     | <i>Arabidopsis thaliana</i>      | 54.5  | 42.3  | 44.1  | 0.7 | 0.3 | 1.1 | 0.8 |
| 1896 | 148b08 | AV627862 | LCL033a09 | Putative protein                                                     | <i>Arabidopsis thaliana</i>      | 11.5  | 9.7   | 9.2   | 0.9 | 0.2 | 1.1 | 0.4 |
| 1897 | 119a10 | AV634571 | HCO35a11  | Putative protein                                                     | <i>Arabidopsis thaliana</i>      | 8.9   | 6.6   | 6.0   | 0.8 | 0.1 | 1.1 | 0.1 |
| 1898 | 153h04 | AV630696 | LCL082h01 | Putative protein                                                     | <i>Arabidopsis thaliana</i>      | 15.9  | 16.2  | 14.9  | 1.0 | 0.1 | 1.1 | 0.1 |
| 1899 | 136e06 | AV620742 | LC026c04  | Putative protein                                                     | <i>Arabidopsis thaliana</i>      | 7.5   | 6.8   | 6.5   | 0.9 | 0.1 | 1.1 | 0.2 |
| 1900 | 140g02 | AV624040 | LC072b05  | Putative protein                                                     | <i>Arabidopsis thaliana</i>      | 8.1   | 6.7   | 6.3   | 0.8 | 0.1 | 1.1 | 0.1 |
| 1901 | 030a01 | AV631249 | LCL090h07 | Putative protein                                                     | <i>Arabidopsis thaliana</i>      | 64.0  | 73.1  | 69.4  | 1.2 | 0.3 | 1.1 | 0.1 |
| 1902 | 121g07 | AV637511 | HCO74a06  | Putative protein                                                     | <i>Arabidopsis thaliana</i>      | 7.4   | 9.6   | 9.4   | 1.3 | 0.7 | 1.0 | 0.5 |
| 1903 | 104g07 | AV395978 | CL53h04   | Putative protein                                                     | <i>Arabidopsis thaliana</i>      | 22.9  | 17.1  | 17.3  | 0.8 | 0.2 | 1.0 | 0.3 |
| 1904 | 030e03 | AV631693 | LCL098c12 | Putative protein                                                     | <i>Arabidopsis thaliana</i>      | 7.8   | 7.6   | 7.8   | 1.0 | 0.1 | 1.0 | 0.1 |
| 1905 | 028b11 | AV629726 | LCL064f09 | Putative protein                                                     | <i>Arabidopsis thaliana</i>      | 36.4  | 34.3  | 35.8  | 0.9 | 0.1 | 1.0 | 0.2 |
| 1906 | 113d04 | AV393063 | CM066h11  | Putative protein                                                     | <i>Arabidopsis thaliana</i>      | 219.0 | 199.3 | 203.7 | 0.9 | 0.1 | 1.0 | 0.2 |
| 1907 | 151b07 | AV629362 | LCL057d05 | Putative protein                                                     | <i>Arabidopsis thaliana</i>      | 17.9  | 14.3  | 15.0  | 0.8 | 0.0 | 1.0 | 0.1 |
| 1908 | 023e04 | AV625149 | LC088e05  | Putative protein                                                     | <i>Arabidopsis thaliana</i>      | 10.8  | 9.6   | 10.1  | 0.9 | 0   |     |     |



|      | A      | B        | C         | D                                                                | E                                    | F     | G     | H     | I   | J   | K   | L   |
|------|--------|----------|-----------|------------------------------------------------------------------|--------------------------------------|-------|-------|-------|-----|-----|-----|-----|
| 1924 | 005b05 | AV387323 | CM019h02  | Putative protein                                                 | <i>Arabidopsis thaliana</i>          | 10.8  | 7.6   | 8.7   | 0.7 | 0.1 | 0.9 | 0.1 |
| 1925 | 133d06 | AV645046 | HCL097d07 | Putative protein                                                 | <i>Arabidopsis thaliana</i>          | 47.4  | 26.1  | 31.8  | 0.6 | 0.1 | 0.9 | 0.2 |
| 1926 | 144a11 | AV626124 | LCL002g04 | Putative protein                                                 | <i>Arabidopsis thaliana</i>          | 17.9  | 14.7  | 17.6  | 0.8 | 0.1 | 0.8 | 0.1 |
| 1927 | 107f02 | AV386881 | CM011a03  | Putative protein                                                 | <i>Arabidopsis thaliana</i>          | 19.3  | 14.6  | 19.1  | 0.8 | 0.1 | 0.8 | 0.3 |
| 1928 | 155d11 | AV631423 | LCL093f10 | Putative protein                                                 | <i>Arabidopsis thaliana</i>          | 31.0  | 31.1  | 37.7  | 1.0 | 0.2 | 0.8 | 0.1 |
| 1929 | 027f03 | AV629304 | LCL056c04 | Putative protein                                                 | <i>Arabidopsis thaliana</i>          | 14.9  | 9.6   | 12.3  | 0.7 | 0.1 | 0.8 | 0.2 |
| 1930 | 032b09 | BP093029 | MXL002d06 | Putative protein                                                 | <i>Arabidopsis thaliana</i>          | 19.9  | 15.5  | 19.9  | 0.8 | 0.1 | 0.8 | 0.2 |
| 1931 | 020d05 | AV621005 | LC029h01  | Putative protein                                                 | <i>Arabidopsis thaliana</i>          | 38.0  | 30.9  | 39.0  | 0.9 | 0.2 | 0.8 | 0.1 |
| 1932 | 013a04 | AV637783 | HC077d11  | Putative protein                                                 | <i>Arabidopsis thaliana</i>          | 7.5   | 8.9   | 11.4  | 1.2 | 0.1 | 0.8 | 0.0 |
| 1933 | 127c12 | AV641759 | HCL039h02 | Putative protein                                                 | <i>Arabidopsis thaliana</i>          | 24.1  | 20.3  | 26.2  | 0.8 | 0.0 | 0.8 | 0.2 |
| 1934 | 110c12 | AV389188 | CM035d05  | Putative protein                                                 | <i>Arabidopsis thaliana</i>          | 8.4   | 5.6   | 7.0   | 0.7 | 0.1 | 0.8 | 0.2 |
| 1935 | 034e09 | BP095936 | MXL049f09 | Putative protein                                                 | <i>Arabidopsis thaliana</i>          | 12.0  | 7.9   | 11.0  | 0.7 | 0.1 | 0.7 | 0.1 |
| 1936 | 150g08 | AV629148 | LCL053a11 | Putative protein                                                 | <i>Arabidopsis thaliana</i>          | 15.6  | 12.1  | 17.3  | 0.8 | 0.1 | 0.7 | 0.2 |
| 1937 | 009f02 | AV392149 | CM094f05  | Putative protein                                                 | <i>Arabidopsis thaliana</i>          | 4.9   | 4.3   | 6.0   | 0.9 | 0.3 | 0.7 | 0.1 |
| 1938 | 129c09 | AV642787 | HCL057h08 | Putative protein                                                 | <i>Arabidopsis thaliana</i>          | 13.7  | 11.2  | 16.8  | 0.8 | 0.0 | 0.7 | 0.2 |
| 1939 | 012d10 | AV636863 | HC065c08  | Putative protein                                                 | <i>Arabidopsis thaliana</i>          | 23.2  | 16.8  | 28.3  | 0.7 | 0.2 | 0.6 | 0.2 |
| 1940 | 022f05 | AV624036 | LC072a11  | Putative protein                                                 | <i>Caenorhabditis elegans</i>        | 59.6  | 39.2  | 82.6  | 0.7 | 0.0 | 0.5 | 0.1 |
| 1941 | 167d07 | BP096041 | MXL051f01 | Putative protein                                                 | <i>Arabidopsis thaliana</i>          | 21.9  | 10.3  | 22.9  | 0.5 | 0.1 | 0.5 | 0.1 |
| 1942 | 016d08 | AV642144 | HCL046c12 | Putative protein (fragment)                                      | <i>Arabidopsis thaliana</i>          | 3.5   | 7.7   | 7.1   | 2.2 | 0.8 | 1.1 | 0.3 |
| 1943 | 135g03 | AV620200 | LC018h09  | Putative protein including conserved glyoxalase domain           | <i>Arabidopsis thaliana</i>          | 7.4   | 41.7  | 32.3  | 5.8 | 1.4 | 1.3 | 0.3 |
| 1944 | 022a04 | AV624187 | LC074b07  | Putative protein including conserved glyoxalase domain           | <i>Arabidopsis thaliana</i>          | 23.1  | 80.4  | 68.2  | 3.7 | 1.0 | 1.2 | 0.4 |
| 1945 | 031a08 | BP086443 | MX008h12  | Putative protein involved in starch metabolism                   | <i>Arabidopsis thaliana</i>          | 22.9  | 20.7  | 17.0  | 0.9 | 0.2 | 1.2 | 0.1 |
| 1946 | 015c07 | AV640968 | HCL025e06 | Putative protein kinase                                          | <i>Arabidopsis thaliana</i>          | 49.9  | 39.8  | 33.3  | 0.8 | 0.2 | 1.2 | 0.3 |
| 1947 | 033c07 | BP094488 | MXL023h03 | Putative protein phosphatase 2C                                  | <i>Arabidopsis thaliana</i>          | 38.2  | 27.8  | 49.6  | 0.7 | 0.0 | 0.7 | 0.4 |
| 1948 | 118h08 | AV634407 | HC033a03  | Putative protein sorting-associated protein                      | <i>Arabidopsis thaliana</i>          | 7.5   | 6.0   | 7.2   | 0.8 | 0.1 | 0.8 | 0.1 |
| 1949 | 031h08 | BP087481 | MX035d11  | Putative protein transport protein SEC13                         | <i>Arabidopsis thaliana</i>          | 16.8  | 14.8  | 15.4  | 0.9 | 0.3 | 1.0 | 0.2 |
| 1950 | 026h11 | AV628696 | LCL045g08 | Putative protein transport protein SEC61 alpha subunit           | <i>Arabidopsis thaliana</i>          | 30.3  | 21.0  | 22.8  | 0.7 | 0.2 | 0.9 | 0.2 |
| 1951 | 126a07 | AV640965 | HCL025e01 | Putative proton pump                                             | <i>Arabidopsis thaliana</i>          | 17.2  | 16.3  | 19.1  | 1.0 | 0.1 | 0.9 | 0.2 |
| 1952 | 140g12 | AV624098 | LC072h09  | Putative PRP19-like spliceosomal protein                         | <i>Arabidopsis thaliana</i>          | 11.1  | 9.4   | 9.1   | 0.9 | 0.1 | 1.0 | 0.1 |
| 1953 | 171f03 | BP098003 | MXL085b03 | Putative PRP19-like spliceosomal protein                         | <i>Arabidopsis thaliana</i>          | 24.0  | 16.5  | 21.9  | 0.7 | 0.1 | 0.8 | 0.3 |
| 1954 | 170f07 | BP097529 | MXL077d02 | Putative PRP19-like spliceosomal protein                         | <i>Arabidopsis thaliana</i>          | 28.6  | 19.1  | 25.8  | 0.7 | 0.1 | 0.8 | 0.2 |
| 1955 | 152b04 | AV629807 | LCL066e04 | Putative P-type ATPase                                           | <i>Arabidopsis thaliana</i>          | 7.7   | 6.9   | 7.6   | 0.9 | 0.1 | 0.9 | 0.2 |
| 1956 | 171e11 | BP097984 | MXL084f10 | Putative pyrophosphate-fructose-6-phosphate 1-phosphotransferase | <i>Arabidopsis thaliana</i>          | 12.6  | 12.5  | 11.2  | 1.0 | 0.1 | 1.1 | 0.2 |
| 1957 | 035g10 | BP097424 | MXL075e02 | Putative pyrophosphate-fructose-6-phosphate 1-phosphotransferase | <i>Arabidopsis thaliana</i>          | 19.9  | 22.5  | 23.7  | 1.1 | 0.2 | 0.9 | 0.0 |
| 1958 | 132a04 | AV644813 | HCL094b07 | Putative pyruvate dehydrogenase E1 beta subunit                  | <i>Arabidopsis thaliana</i>          | 29.2  | 28.0  | 26.2  | 1.0 | 0.0 | 1.1 | 0.2 |
| 1959 | 151b08 | AV629368 | LCL057e05 | Putative pyruvate kinase                                         | <i>Arabidopsis thaliana</i>          | 17.8  | 13.6  | 11.7  | 0.8 | 0.1 | 1.2 | 0.3 |
| 1960 | 128b07 | AV642208 | HCL047d10 | Putative pyruvate kinase                                         | <i>Arabidopsis thaliana</i>          | 16.3  | 14.1  | 13.1  | 0.9 | 0.1 | 1.1 | 0.2 |
| 1961 | 022b05 | AV623474 | LC064c08  | Putative R53.5-related PROTEIN                                   | <i>Mus musculus</i>                  | 11.7  | 22.6  | 17.5  | 2.0 | 0.5 | 1.3 | 0.1 |
| 1962 | 151e12 | AV629583 | LCL061d12 | Putative RAD51C-like DNA repair protein                          | <i>Arabidopsis thaliana</i>          | 9.0   | 8.0   | 8.0   | 0.9 | 0.3 | 1.1 | 0.5 |
| 1963 | 025b08 | AV627143 | LCL021g08 | Putative regulator                                               | <i>Escherichia coli</i>              | 6.0   | 4.8   | 5.6   | 0.8 | 0.3 | 0.9 | 0.2 |
| 1964 | 016c12 | AV642033 | HCL044c05 | Putative riboflavin synthase                                     | <i>Arabidopsis thaliana</i>          | 29.6  | 19.3  | 21.2  | 0.7 | 0.2 | 0.9 | 0.4 |
| 1965 | 163b12 | BP098872 | MXL100e08 | Putative ribose 5-phosphate isomerase                            | <i>Arabidopsis thaliana</i>          | 44.9  | 31.4  | 23.1  | 0.7 | 0.3 | 1.9 | 1.6 |
| 1966 | 001a05 | AV397609 | CL02b08   | Putative ribosomal protein                                       | <i>Arabidopsis thaliana</i>          | 128.1 | 141.5 | 78.8  | 1.1 | 0.1 | 2.0 | 1.1 |
| 1967 | 004h03 | AV387379 | CM014g08  | Putative ribosomal protein L10                                   | <i>Arabidopsis thaliana</i>          | 117.5 | 132.1 | 120.3 | 1.2 | 0.4 | 1.2 | 0.3 |
| 1968 | 002d08 | AV395204 | CL39g08   | Putative ribosomal protein L35                                   | <i>Arabidopsis thaliana</i>          | 126.8 | 126.1 | 99.3  | 1.0 | 0.2 | 1.3 | 0.4 |
| 1969 | 004b09 | AV386644 | CM004b07  | Putative ribosomal protein L7                                    | <i>Arabidopsis thaliana</i>          | 147.9 | 163.3 | 131.7 | 1.1 | 0.1 | 1.3 | 0.4 |
| 1970 | 010e03 | AV632851 | HC013d11  | Putative ribosomal protein S10                                   | <i>Arabidopsis thaliana</i>          | 66.2  | 66.2  | 55.8  | 1.0 | 0.2 | 1.2 | 0.2 |
| 1971 | 010a05 | AV632106 | HC004a05  | Putative RNA binding protein                                     | <i>Arabidopsis thaliana</i>          | 26.0  | 43.9  | 33.1  | 1.7 | 0.1 | 1.3 | 0.1 |
| 1972 | 034e01 | BP095814 | MXL047g12 | Putative RNA helicase                                            | <i>Arabidopsis thaliana</i>          | 12.3  | 10.9  | 9.4   | 0.9 | 0.2 | 1.5 | 0.9 |
| 1973 | 036d01 | BP098088 | MXL086g11 | Putative RNA helicase                                            | <i>Arabidopsis thaliana</i>          | 42.9  | 28.6  | 38.2  | 0.7 | 0.1 | 1.2 | 0.9 |
| 1974 | 114d09 | AV389693 | CM076f12  | Putative RNA helicase                                            | <i>Arabidopsis thaliana</i>          | 32.7  | 20.0  | 26.8  | 0.6 | 0.1 | 0.8 | 0.2 |
| 1975 | 004g08 | AV387081 | CM013g10  | Putative RNA polymerase II subunit Rpb10                         | <i>Arabidopsis thaliana</i>          | 9.2   | 8.1   | 6.7   | 1.0 | 0.2 | 1.2 | 0.3 |
| 1976 | 161g05 | BP093311 | MXL006e11 | Putative RNA-binding protein                                     | <i>Arabidopsis thaliana</i>          | 67.8  | 61.7  | 49.4  | 1.0 | 0.3 | 1.3 | 0.1 |
| 1977 | 164f10 | BP094873 | MXL031d11 | Putative Sec24-like COPII protein                                | <i>Arabidopsis thaliana</i>          | 15.9  | 12.2  | 14.4  | 0.8 | 0.1 | 0.9 | 0.2 |
| 1978 | 011b01 | AV634253 | HC031a10  | Putative SecA-type chloroplast protein transport factor          | <i>Arabidopsis thaliana</i>          | 9.4   | 10.9  | 9.9   | 1.2 | 0.2 | 1.1 | 0.2 |
| 1979 | 125c01 | AV640499 | HCL017d02 | Putative secreted protein                                        | <i>Streptomyces coelicolor</i> A3(2) | 14.5  | 15.2  | 12.7  | 1.0 | 0.1 | 1.2 | 0.3 |
| 1980 | 005e11 | AV639808 | HCL005c12 | Putative Ser/Thr kinase                                          | <i>Arabidopsis thaliana</i>          | 36.2  | 24.7  | 35.8  | 0.7 | 0.2 | 0.8 | 0.4 |
| 1981 | 017a04 | AV642760 | HCL057d06 | Putative serine carboxypeptidase I                               | <i>Arabidopsis thaliana</i>          | 6.6   | 15.5  | 12.5  | 2.4 | 0.5 | 1.3 | 0.3 |
| 1982 | 012h10 | AV637690 | HC076c09  | Putative serine protease-like protein                            | <i>Arabidopsis thaliana</i>          | 8.5   | 9.5   | 9.9   | 1.1 | 0.2 | 1.0 | 0.3 |
| 1983 | 028g02 | AV630227 | LCL075g02 | Putative serine/threonine kinase                                 | <i>Feldmannia sp. virus</i>          | 20.9  | 15.2  | 12.9  | 0.7 | 0.1 | 1.2 | 0.3 |
| 1984 | 017e11 | AV643363 | HCL068d04 | Putative serine/threonine kinase                                 | <i>Collotrichum lindemuthianum</i>   | 7.0   | 7.5   | 8.4   | 1.1 | 0.5 | 0.9 | 0.4 |
| 1985 | 030h06 | BP086246 | MX004h09  | Putative serine/threonine-protein kinase PSK-C3                  | <i>Chlamydomonas reinhardtii</i>     | 19.3  | 22.5  | 18.2  | 1.2 | 0.1 | 1.2 | 0.1 |
| 1986 | 107e11 | AV386977 | CM010h06  | Putative small nuclear ribonucleoprotein                         | <i>Arabidopsis thaliana</i>          | 13.5  | 15.4  | 14.2  | 1.3 | 0.7 | 1.2 | 0.6 |
| 1987 | 022c10 | AV623696 | LC067d08  | Putative small nuclear ribonucleoprotein E                       | <i>Arabidopsis thaliana</i>          | 19.9  | 13.3  | 19.9  | 0.7 | 0.2 | 0.7 | 0.2 |
| 1988 | 156c08 | AV631806 | LCL100b05 | Putative small nuclear ribonucleoprotein polypeptide F           | <i>Arabidopsis thaliana</i>          | 17.7  | 17.7  | 18.8  | 1.0 | 0.2 | 0.9 | 0.1 |
| 1989 | 142e02 | AV625186 | LC089a07  | Putative small nuclear ribonucleoprotein Sm-D1                   | <i>Arabidopsis thaliana</i>          | 19.7  | 12.0  | 12.0  | 0.6 | 0.3 | 1.1 | 0.6 |
| 1990 | 017c03 | AV643016 | HCL062c06 | Putative SNF2 subfamily transcriptional activator                | <i>Arabidopsis thaliana</i>          | 1.7   | 1.9   | 1.3   | 1.2 | 0.5 | 1.6 | 0.7 |
| 1991 | 129g07 | AV643016 | HCL062c06 | Putative SNF2 subfamily transcriptional activator                | <i>Arabidopsis thaliana</i>          | 14.7  | 12.4  | 23.3  | 0.8 | 0.1 | 0.6 | 0.3 |
| 1992 | 122c10 | AV638085 | HC081g03  | Putative spliceosome-associated protein                          | <i>Arabidopsis thaliana</i>          | 17.1  | 14.1  | 17.7  | 0.8 | 0.1 | 0.8 | 0.1 |
| 1993 | 172c11 | BP098335 | MXL091g03 | Putative splicing factor                                         | <i>Oryza sativa</i>                  | 9.9   | 10.0  | 8.0   | 1.1 | 0.2 | 1.3 | 0.5 |
| 1994 | 012f05 | AV637116 | HC068h10  | Putative splicing factor                                         | <i>Arabidopsis thaliana</i>          | 15.4  | 14.7  | 13.3  | 1.0 | 0.2 | 1.1 | 0.2 |
| 1995 | 170c09 | BP097346 | MXL074c01 | Putative splicing factor Prp8                                    | <i>Arabidopsis thaliana</i>          | 17.5  | 18.0  | 15.4  | 1.0 | 0.0 | 1.2 | 0.1 |
| 1996 | 036a11 | BP097741 | MXL080f02 | Putative splicing factor Prp8                                    | <i>Arabidopsis thaliana</i>          | 17.3  | 12.8  | 13.5  | 0.8 | 0.2 | 0.9 | 0.1 |
| 1997 | 025e12 | AV627573 | LCL028g08 | Putative steroid binding protein                                 | <i>Arabidopsis thaliana</i>          | 8.4   | 7.7   | 7.7   | 0.9 | 0.1 | 1.0 | 0.1 |
| 1998 | 140d11 | AV623834 | LC069c10  | Putative synaptobrevin                                           | <i>Arabidopsis thaliana</i>          | 17.3  | 28.6  | 24.2  | 1.7 | 0.3 | 1.2 | 0.2 |
| 1999 | 026a07 | AV628019 | LCL035e02 | Putative thioredoxin reductase                                   | <i>Arabidopsis thaliana</i>          | 12.8  | 25.6  | 20.7  | 2.0 | 0.4 | 1.2 | 0.1 |
| 2000 | 146g02 | AV627209 | LCL022g03 | Putative thylakoid lumen rotamase                                | <i>Arabidopsis thaliana</i>          | 87.8  | 77.4  | 57.6  | 0.9 | 0.1 | 1.4 | 0.7 |
| 2001 | 163b06 | BP094098 | MXL018b07 | Putative toalien-like protein                                    | <i>Oryza sativa</i>                  | 11.8  | 12.0  | 8.2   | 1.0 | 0.2 | 1.7 | 0.7 |
| 2002 | 005f08 | AV387660 | CM027e09  | Putative transcription factor-like protein                       | <i>Arabidopsis thaliana</i>          | 9.5   | 8.5   | 11.4  | 0.9 | 0.2 | 0.7 | 0.2 |
| 2003 | 135c12 | AV619775 | LC014d08  | Putative translation initiation factor                           | <i>Arabidopsis thaliana</i>          | 75.7  | 95.3  | 61.0  | 1.3 | 0.1 | 1.6 | 0.1 |
| 2004 | 147a02 | AV627332 | LCL025b09 | Putative translation initiation factor                           | <i>Arabidopsis thaliana</i>          | 30.4  | 19.4  | 14.1  | 0.6 | 0.1 | 1.4 | 0.1 |
| 2005 | 018b12 | AV644290 | HCL085f04 | Putative translation initiation factor eIF-2B alphasubunit       | <i>Arabidopsis thaliana</i>          | 9.0   | 5.0   | 4.9   | 0.6 | 0.2 | 1.2 | 0.6 |
| 2006 | 029b12 | BP383845 | LCL082f12 | Putative transportin                                             | <i>Arabidopsis thaliana</i>          | 15.0  | 11.2  | 13.8  | 0.8 | 0.2 | 1.0 | 0.5 |
| 2007 | 124c01 | AV640057 | HCL009e09 | Putative trehalose-6-phosphate synthase homolog                  | <i>Arabidopsis thaliana</i>          | 18.7  | 15.4  | 21.2  | 0.8 | 0.1 | 0.8 | 0.2 |
| 2008 | 029f11 | AV631015 | LCL087f07 | Putative triosephosphate isomerase                               | <i>Arabidopsis thaliana</i>          | 27.9  | 19.6  | 13.6  | 0.7 | 0.1 | 1.6 | 0.9 |
| 2009 | 035b07 | BP096662 | MXL062f04 | Putative tropinone reductase                                     | <i>Arabidopsis thaliana</i>          | 9.5   | 15.9  | 10.8  | 1.7 | 0.2 | 1.5 | 0.2 |
| 2010 | 158f01 | BP087669 | MX041a06  | Putative tyrosine phosphatase                                    | <i>Oryza sativa</i>                  | 28.4  | 53.9  | 37.6  | 2.0 | 0.7 | 1.5 | 0.3 |
| 2011 | 019h09 | AV620492 | LC022h05  | Putative tyrosine phosphatase                                    | <i>Oryza sativa</i>                  | 29.4  | 51.2  | 42.4  | 1.8 | 0.4 | 1.3 | 0.2 |
| 2012 | 128c11 | AV642297 | HCL049b11 | Putative U3 small nucleolar ribonucleoprotein protein            | <i>Arabidopsis thaliana</i>          | 16.2  | 11.8  | 19.2  | 0.7 | 0.1 | 0.6 | 0.1 |
| 2013 | 120f02 | AV636171 | HC056a11  | Putative U5 small nucleolar ribonucleoprotein, an RNHelicase     | <i>Arabidopsis thaliana</i>          | 10.5  | 11.7  | 10.4  | 1.2 | 0.2 | 1.2 | 0.2 |
| 2014 | 009b04 | AV390396 | CM084a02  | Putative ubiquinone reductase</                                  |                                      |       |       |       |     |     |     |     |

|      | A      | B        | C         | D                                                           | E                                        | F     | G     | H     | I   | J   | K   | L   |
|------|--------|----------|-----------|-------------------------------------------------------------|------------------------------------------|-------|-------|-------|-----|-----|-----|-----|
| 2031 | 005g04 | AV388337 | CM028g10  | Pyrophosphate-dependent phosphofructo-1-kinase              | <i>Prunus armeniaca</i>                  | 11.9  | 12.6  | 11.7  | 1.2 | 0.4 | 1.1 | 0.3 |
| 2032 | 129g02 | AV643001 | HCL061h11 | Pyruvate carboxylase                                        | <i>Mus musculus</i>                      | 20.7  | 18.9  | 17.2  | 0.9 | 0.1 | 1.1 | 0.2 |
| 2033 | 121a08 | AV637523 | HCO74b08  | Pyruvate decarboxylase isozyme 1                            | <i>Zea mays</i>                          | 8.1   | 6.6   | 12.9  | 0.8 | 0.1 | 0.5 | 0.1 |
| 2034 | 141a11 | AV624259 | LC075c01  | Pyruvate dehydrogenase E1 alpha subunit                     | <i>Arabidopsis thaliana</i>              | 58.1  | 56.8  | 70.7  | 1.0 | 0.1 | 0.8 | 0.1 |
| 2035 | 030d09 | AV631666 | LCL097h07 | Pyruvate dehydrogenase E1 alpha subunit                     | <i>Arabidopsis thaliana</i>              | 61.4  | 53.3  | 83.0  | 0.9 | 0.1 | 0.6 | 0.1 |
| 2036 | 118c03 | AV633627 | HC023b08  | Pyruvate dehydrogenase E1 beta subunit                      | <i>Synechocystis sp. PCC 6803</i>        | 18.1  | 16.2  | 18.5  | 0.9 | 0.2 | 0.9 | 0.3 |
| 2037 | 012d09 | AV636845 | HC065a05  | Pyruvate dehydrogenase E1 beta subunit isoform 1            | <i>Zea mays</i>                          | 24.5  | 21.5  | 27.1  | 0.9 | 0.1 | 0.8 | 0.2 |
| 2038 | 080e01 | AV387740 | CM069g05  | Pyruvate dehydrogenase kinase                               | <i>Arabidopsis thaliana</i>              | 11.0  | 12.9  | 10.9  | 1.2 | 0.2 | 1.2 | 0.4 |
| 2039 | 023e05 | AV625163 | LC088f11  | Pyruvate dehydrogenase kinase isoform 2; PDK2               | <i>Zea mays</i>                          | 21.4  | 18.1  | 20.3  | 0.8 | 0.1 | 1.0 | 0.4 |
| 2040 | 165a09 | BP095038 | MXL034g11 | Pyruvate formate-lyase                                      |                                          | 81.8  | 131.0 | 20.6  | 1.6 | 0.2 | 9.8 | 8.2 |
| 2041 | 130h12 | AV643769 | HCL075f09 | Pyruvate formate-lyase                                      | <i>Zymomonas mobilis</i>                 | 77.3  | 95.8  | 24.8  | 1.4 | 0.4 | 3.9 | 0.6 |
| 2042 | 001d04 | AV393788 | CL11h03   | Pyruvate formate-lyase                                      | <i>Thermosynechococcus elongatus BP-</i> | 34.4  | 48.3  | 12.9  | 1.6 | 0.6 | 3.9 | 1.1 |
| 2043 | 164e03 | BP094763 | MXL029a06 | Pyruvate formate-lyase                                      |                                          | 102.8 | 105.5 | 28.8  | 1.3 | 0.5 | 3.7 | 1.1 |
| 2044 | 154a04 | AV630757 | LCL083h04 | Pyruvate formate-lyase                                      |                                          | 77.5  | 87.7  | 25.3  | 1.2 | 0.3 | 3.6 | 1.0 |
| 2045 | 171h10 | BP098163 | MXL088e04 | Pyruvate kinase                                             | <i>Escherichia coli</i>                  | 7.5   | 5.8   | 7.2   | 0.7 | 0.2 | 0.9 | 0.8 |
| 2046 | 167d05 | BP096030 | MXL051c11 | Pyruvate kinase                                             | <i>Escherichia coli</i>                  | 16.2  | 10.7  | 13.6  | 0.7 | 0.1 | 0.8 | 0.3 |
| 2047 | 126b04 | AV641046 | HCL028g05 | Pyruvate kinase, cytosolic isozyme                          | <i>Arabidopsis thaliana</i>              | 19.9  | 12.8  | 12.7  | 0.6 | 0.1 | 1.0 | 0.1 |
| 2048 | 015g12 | AV641441 | HCL033f08 | Pyruvate kinase, cytosolic isozyme                          | <i>Glycine max</i>                       | 2.2   | 1.5   | 1.9   | 0.7 | 0.1 | 0.8 | 0.3 |
| 2049 | 125d05 | AV640606 | HCL019a12 | Pyruvatekinase                                              | <i>Eimeria tenella</i>                   | 7.8   | 5.7   | 5.9   | 0.8 | 0.2 | 1.0 | 0.3 |
| 2050 | 142f04 | AV625335 | LC091a11  | QM family protein                                           | <i>Solanum melongena</i>                 | 11.6  | 13.5  | 11.2  | 1.1 | 0.4 | 1.2 | 0.5 |
| 2051 | 143f11 | AV625893 | LC099e03  | QM homolog                                                  | <i>Drosophila melanogaster</i>           | 169.2 | 143.9 | 137.0 | 0.9 | 0.0 | 1.1 | 0.4 |
| 2052 | 031a05 | BP086375 | MX007e04  | Quinolinate synthetase, B protein                           | <i>Escherichia coli</i>                  | 44.0  | 23.5  | 62.1  | 0.6 | 0.1 | 0.4 | 0.1 |
| 2053 | 034d04 | BP095696 | MXL046a01 | Quinol-to-oxygen oxidoreductase                             | <i>Chlamydomonas reinhardtii</i>         | 11.9  | 11.9  | 11.5  | 0.9 | 0.4 | 1.2 | 0.9 |
| 2054 | 121h08 | AV637679 | HCO76b06  | RAB, member of RAS oncogenefamily-like 2B                   | <i>Homo sapiens</i>                      | 26.4  | 34.3  | 23.0  | 1.3 | 0.1 | 1.5 | 0.1 |
| 2055 | 011c01 | AV634486 | HC034a05  | RAB5A                                                       | <i>Lotus japonicus</i>                   | 8.2   | 17.8  | 17.9  | 2.2 | 0.5 | 1.0 | 0.1 |
| 2056 | 115f05 | AV391240 | CM089g12  | rADP-ribosylation factor-like 2                             | <i>Homo sapiens</i>                      | 4.6   | 6.7   | 5.2   | 1.5 | 0.4 | 1.3 | 0.3 |
| 2057 | 022a10 | AV623354 | LC062e07  | Ran binding protein 1 homolog                               | <i>Arabidopsis thaliana</i>              | 75.4  | 35.4  | 34.7  | 0.4 | 0.1 | 1.0 | 0.3 |
| 2058 | 012e04 | AV636972 | HC066h06  | rap55                                                       | <i>Pleurodeles waltl</i>                 | 10.6  | 13.2  | 12.1  | 1.2 | 0.2 | 1.1 | 0.2 |
| 2059 | 033g06 | BP094887 | MXL031f12 | RecA                                                        | <i>Rhodothermus marinus</i>              | 16.9  | 19.6  | 11.7  | 1.2 | 0.2 | 1.7 | 0.5 |
| 2060 | 002c03 | AV394936 | CL34h07   | Recombinase (FLP)                                           | <i>Saccharomyces cerevisiae</i>          | 4.7   | 5.7   | 4.9   | 1.3 | 0.2 | 1.1 | 0.2 |
| 2061 | 034h11 | BP096452 | MXL059a02 | Regulatory protein of P-starvationacclimation response Psr1 | <i>Chlamydomonas reinhardtii</i>         | 6.4   | 6.2   | 7.3   | 1.0 | 0.1 | 1.0 | 0.7 |
| 2062 | 034b09 | BP095393 | MXL041b07 | Regulatory subunit of cAMP-dependent proteinkinase          | <i>Chlamydomonas reinhardtii</i>         | 14.2  | 11.5  | 9.7   | 0.8 | 0.1 | 1.2 | 0.3 |
| 2063 | 126b05 | AV641069 | HCL027b12 | Repetitive protein antigen 69/70                            | <i>Trypanosoma cruzi</i>                 | 20.4  | 16.8  | 23.0  | 0.8 | 0.1 | 0.8 | 0.3 |
| 2064 | 149e03 | AV628513 | LCL043a10 | Replication factorC, 37-kDa subunit                         | <i>Arabidopsis thaliana</i>              | 10.3  | 17.2  | 10.9  | 1.6 | 0.2 | 1.6 | 0.4 |
| 2065 | 020e06 | AV621121 | LC031e06  | Required for cell differentiation homolog                   | <i>Arabidopsis thaliana</i>              | 7.5   | 7.2   | 7.2   | 1.0 | 0.2 | 1.0 | 0.2 |
| 2066 | 120a02 | AV636056 | HC054f06  | RER1B protein                                               | <i>Arabidopsis thaliana</i>              | 7.4   | 6.6   | 6.4   | 0.9 | 0.3 | 1.1 | 0.4 |
| 2067 | 030e12 | BP383848 | LCL099g07 | Response regulator                                          | <i>Thermotoga maritima</i>               | 10.3  | 7.8   | 12.0  | 0.9 | 0.7 | 0.7 | 0.3 |
| 2068 | 155e08 | AV631463 | LCL094a04 | Retinoblastoma-related protein 2b                           | <i>Zea mays</i>                          | 12.0  | 10.6  | 13.8  | 0.9 | 0.2 | 0.8 | 0.2 |
| 2069 | 025e10 | AV627536 | LCL028b09 | Reverse transcriptase                                       | <i>Chlorella vulgaris</i>                | 18.7  | 24.6  | 17.4  | 1.4 | 0.4 | 1.4 | 0.1 |
| 2070 | 021d08 | AV622343 | LC048d07  | Reversibly glycosylated polypeptide-1                       | <i>Oryza sativa</i>                      | 64.4  | 53.6  | 59.4  | 0.8 | 0.0 | 0.9 | 0.1 |
| 2071 | 014a06 | AV639689 | HCL003b05 | RF2                                                         | <i>Zea mays</i>                          | 15.3  | 19.2  | 13.1  | 1.6 | 0.9 | 1.5 | 0.3 |
| 2072 | 015c10 | AV640978 | HCL025f07 | Rh antigen-like protein                                     | <i>Geodia cydonium</i>                   | 5.6   | 3.6   | 5.0   | 0.6 | 0.1 | 0.8 | 0.2 |
| 2073 | 107e07 | AV386953 | CM010d12  | Ribonuclease II                                             | <i>Synechocystis sp. PCC 6803</i>        | 20.8  | 11.9  | 21.2  | 0.6 | 0.1 | 0.6 | 0.2 |
| 2074 | 036f08 | BP098522 | MXL094f04 | Ribonucleoside-diphosphate reductase large subunit          | <i>Oryza sativa</i>                      | 14.4  | 15.3  | 14.0  | 1.1 | 0.2 | 1.1 | 0.6 |
| 2075 | 167f05 | BP096135 | MXL053c11 | Ribonucleoside-diphosphate reductase large subunit          | <i>Arabidopsis thaliana</i>              | 14.8  | 15.2  | 15.6  | 1.0 | 0.5 | 1.0 | 0.7 |
| 2076 | 036e07 | BP098333 | MXL091f12 | Ribonucleotide reductase                                    | <i>Nicotiana tabacum</i>                 | 15.3  | 16.6  | 13.6  | 1.1 | 0.0 | 1.3 | 0.6 |
| 2077 | 019g03 | AV620227 | LC019c07  | Ribonucleotide reductase                                    | <i>Nicotiana tabacum</i>                 | 10.6  | 11.2  | 10.9  | 1.1 | 0.2 | 1.0 | 0.3 |
| 2078 | 164a11 | BP094629 | MXL026a03 | Ribonucleotide reductase small subunit                      | <i>Glycine max</i>                       | 13.0  | 17.5  | 12.0  | 1.5 | 0.3 | 2.1 | 1.1 |
| 2079 | 019e04 | AV619974 | LC015g05  | Ribose-5-phosphate isomerase                                | <i>Arabidopsis thaliana</i>              | 60.6  | 32.6  | 31.6  | 0.5 | 0.2 | 1.1 | 0.6 |
| 2080 | 010b06 | AV632277 | HC006b11  | Ribosomal protein                                           | <i>Mus musculus</i>                      | 108.8 | 117.5 | 110.2 | 1.1 | 0.1 | 1.1 | 0.3 |
| 2081 | 116f07 | AV392810 | CM100h11  | Ribosomal protein                                           | <i>Arabidopsis thaliana</i>              | 229.6 | 213.5 | 263.5 | 0.9 | 0.1 | 0.8 | 0.1 |
| 2082 | 012a06 | AV635869 | HC052a07  | Ribosomal protein 30S subunit                               | <i>Spinacia oleracea</i>                 | 60.1  | 63.2  | 26.7  | 1.1 | 0.2 | 2.8 | 1.6 |
| 2083 | 121d03 | AV637099 | HC068f09  | Ribosomal protein I                                         | <i>Ceratopteris richardii</i>            | 14.9  | 10.6  | 12.3  | 0.7 | 0.2 | 0.9 | 0.2 |
| 2084 | 018f12 | AV619044 | LC003a06  | Ribosomal protein L11 homolog                               | <i>Arabidopsis thaliana</i>              | 4.0   | 3.9   | 4.3   | 1.0 | 0.1 | 0.9 | 0.5 |
| 2085 | 101a05 | AV393340 | CL01d02   | Ribosomal protein L12                                       | <i>Prunus armeniaca</i>                  | 38.8  | 50.5  | 50.6  | 1.4 | 0.3 | 1.0 | 0.2 |
| 2086 | 010h06 | AV633765 | HC025a01  | Ribosomal protein L12                                       | <i>Guillardia theta</i>                  | 153.9 | 53.0  | 80.9  | 0.3 | 0.2 | 0.7 | 0.4 |
| 2087 | 001h07 | AV394617 | CL26e09   | Ribosomal protein L13a like protein                         | <i>Arabidopsis thaliana</i>              | 54.7  | 61.2  | 58.6  | 1.1 | 0.1 | 1.1 | 0.3 |
| 2088 | 002c12 | AV395149 | CL36f08   | Ribosomal protein L17                                       | <i>Zea mays</i>                          | 64.7  | 54.9  | 45.1  | 0.8 | 0.0 | 1.2 | 0.3 |
| 2089 | 110h10 | AV389965 | CM041b05  | Ribosomal protein L18a                                      | <i>Arabidopsis thaliana</i>              | 29.3  | 34.6  | 31.6  | 1.2 | 0.1 | 1.1 | 0.1 |
| 2090 | 158g04 | BP087692 | MX041f05  | Ribosomal protein L18a, cytosolic                           | <i>Arabidopsis thaliana</i>              | 84.9  | 82.6  | 80.2  | 1.0 | 0.1 | 1.0 | 0.1 |
| 2091 | 006a05 | AV388850 | CM033b07  | Ribosomal protein L24                                       | <i>Nicotiana tabacum</i>                 | 65.3  | 48.9  | 45.4  | 0.7 | 0.3 | 1.1 | 0.6 |
| 2092 | 013e08 | AV638849 | HC091f04  | Ribosomal protein L24                                       | <i>Nicotiana tabacum</i>                 | 51.8  | 33.0  | 44.4  | 0.6 | 0.2 | 0.8 | 0.4 |
| 2093 | 004h02 | AV387402 | CM014e04  | Ribosomal protein L26                                       | <i>Zea mays</i>                          | 71.5  | 94.2  | 62.7  | 1.3 | 0.5 | 1.6 | 0.8 |
| 2094 | 122b11 | AV637940 | HC079f07  | Ribosomal protein L27a                                      | <i>Petunia x hybrida</i>                 | 118.7 | 119.0 | 86.9  | 1.0 | 0.2 | 1.7 | 1.0 |
| 2095 | 014f08 | AV640287 | HCL013g04 | Ribosomal protein L27a                                      | <i>Arabidopsis thaliana</i>              | 94.6  | 73.6  | 70.5  | 0.8 | 0.1 | 1.2 | 0.5 |
| 2096 | 003b01 | AV396161 | CL54g06   | Ribosomal protein L30                                       | <i>Lupinus luteus</i>                    | 95.9  | 138.3 | 131.9 | 1.5 | 0.2 | 1.1 | 0.2 |
| 2097 | 032e01 | BP093341 | MXL007b03 | Ribosomal protein L32                                       | <i>Spodoptera frugiperda</i>             | 113.4 | 130.1 | 68.1  | 1.1 | 0.3 | 1.9 | 0.8 |
| 2098 | 161g12 | BP093351 | MXL007c03 | Ribosomal protein L32                                       | <i>Spodoptera frugiperda</i>             | 50.5  | 39.5  | 52.2  | 0.8 | 0.2 | 0.8 | 0.1 |
| 2099 | 032a08 | BP087709 | MX041h08  | Ribosomal protein L33                                       | <i>Cyanophora paradoxa</i>               | 81.9  | 52.2  | 42.2  | 0.6 | 0.2 | 1.2 | 0.7 |
| 2100 | 142g10 | AV625442 | LC029f07  | Ribosomal protein L33                                       | <i>Haemophilus influenzae Rd</i>         | 9.8   | 9.2   | 8.2   | 1.0 | 0.2 | 1.1 | 0.2 |
| 2101 | 003a09 | AV395968 | CL53f01   | Ribosomal protein L34 homolog                               | <i>Pisum sativum</i>                     | 43.0  | 56.6  | 38.2  | 1.4 | 0.4 | 1.5 | 0.1 |
| 2102 | 003d03 | AV396378 | CL66d05   | Ribosomal protein L41                                       | <i>Chlamydomonas reinhardtii</i>         | 71.2  | 94.2  | 74.0  | 1.5 | 0.5 | 1.3 | 0.2 |
| 2103 | 119g06 | BP383703 | HC045d09  | Ribosomal protein L5                                        | <i>Myxine glutinosa</i>                  | 143.7 | 121.7 | 125.3 | 0.8 | 0.1 | 1.1 | 0.4 |
| 2104 | 001b11 | AV393630 | CL06g06   | Ribosomal protein L7a                                       | <i>Oryza sativa</i>                      | 70.9  | 89.2  | 76.4  | 1.5 | 0.8 | 1.2 | 0.2 |
| 2105 | 108e05 | AV397438 | CM020a09  | Ribosomal protein L8                                        | <i>Homo sapiens</i>                      | 8.1   | 8.0   | 7.9   | 1.0 | 0.2 | 1.1 | 0.3 |
| 2106 | 157d03 | BP086833 | MX017h10  | Ribosomal protein S10, cytosolic                            | <i>Arabidopsis thaliana</i>              | 41.1  | 59.8  | 46.4  | 1.5 | 0.4 | 1.5 | 0.6 |
| 2107 | 118f03 | BP383694 | HC027f04  | Ribosomal protein S12                                       | <i>Hordeum vulgare</i>                   | 61.5  | 55.3  | 37.7  | 0.9 | 0.0 | 1.5 | 0.8 |
| 2108 | 106g06 | AV386586 | CM003b08  | Ribosomal protein S12                                       | <i>Aquilex aeolicus</i>                  | 9.4   | 8.7   | 7.3   | 0.9 | 0.2 | 1.2 | 0.2 |
| 2109 | 026c07 | AV628241 | LCL039a06 | Ribosomal protein S14                                       | <i>Chlamydomonas reinhardtii</i>         | 164.6 | 184.0 | 124.4 | 1.1 | 0.0 | 1.6 | 0.8 |
| 2110 | 010b10 | AV632338 | HC006h09  | Ribosomal protein S16                                       | <i>Solanum tuberosum</i>                 | 79.4  | 82.7  | 77.6  | 1.0 | 0.5 | 1.0 | 0.6 |
| 2111 | 107g06 | AV387120 | CM012e12  | Ribosomal protein S16                                       | <i>Tortula ruralis</i>                   | 64.1  | 79.3  | 94.5  | 1.2 | 0.2 | 0.9 | 0.3 |
| 2112 | 003h07 | AV397327 | CL80b07   | Ribosomal protein S19                                       | <i>Solanum tuberosum</i>                 | 47.7  | 41.1  |       |     |     |     |     |

|      | A      | B        | C         | D                                                            | E                                    | F      | G      | H      | I    | J   | K   | L   |
|------|--------|----------|-----------|--------------------------------------------------------------|--------------------------------------|--------|--------|--------|------|-----|-----|-----|
| 2138 | 134e04 | AV619342 | LC007a02  | Ribulose biphosphate carboxylase small chain 2               | <i>Chlamydomonas reinhardtii</i>     | 1377.5 | 1242.8 | 1055.2 | 0.9  | 0.1 | 1.2 | 0.1 |
| 2139 | 104f03 | AV395914 | CL51f05   | Ribulose biphosphate carboxylase small chain 2               | <i>Chlamydomonas reinhardtii</i>     | 214.7  | 190.8  | 170.0  | 0.9  | 0.4 | 1.1 | 0.3 |
| 2140 | 019g07 | AV620263 | LC019g07  | Ribulose1,5-biphosphate carboxylase/oxygenase activase       | <i>Chlamydomonas reinhardtii</i>     | 39.4   | 65.0   | 70.2   | 1.7  | 0.3 | 1.0 | 0.4 |
| 2141 | 012b06 | AV636208 | HC056e06  | Ribulose-5-phosphate-3-epimerase                             | <i>Oryza sativa</i>                  | 55.9   | 23.4   | 35.0   | 0.4  | 0.0 | 0.7 | 0.3 |
| 2142 | 034g11 | BP096272 | MXL055g08 | Ribulosebiphosphatecarboxylase                               | <i>Chlamydomonas reinhardtii</i>     | 1836.6 | 1576.4 | 1568.4 | 0.9  | 0.1 | 1.0 | 0.2 |
| 2143 | 140a07 | AV623557 | LC065f03  | Ripening-associated protein                                  | <i>Lycopersicon esculentum</i>       | 16.2   | 10.6   | 9.0    | 0.6  | 0.1 | 1.2 | 0.4 |
| 2144 | 104g01 | AV395981 | CL53b07   | RNA helicase                                                 | <i>Arabidopsis thaliana</i>          | 10.3   | 13.5   | 9.1    | 1.3  | 0.1 | 1.5 | 0.3 |
| 2145 | 151f02 | AV629593 | LCL061f02 | RNA helicase                                                 | <i>Homo sapiens</i>                  | 13.3   | 11.9   | 10.0   | 0.9  | 0.2 | 1.2 | 0.4 |
| 2146 | 108h09 | AV387885 | CM022g11  | RNA helicase                                                 | <i>Mus musculus</i>                  | 25.5   | 13.4   | 14.4   | 0.7  | 0.3 | 1.0 | 0.3 |
| 2147 | 104h09 | AV396055 | CL55e06   | RNA helicase                                                 | <i>Spinacia oleracea</i>             | 12.6   | 11.4   | 12.1   | 0.9  | 0.2 | 1.0 | 0.3 |
| 2148 | 017h10 | AV643995 | HCL079g11 | RNA helicase                                                 | <i>Arabidopsis thaliana</i>          | 25.5   | 15.4   | 20.3   | 0.6  | 0.2 | 0.8 | 0.5 |
| 2149 | 012f10 | AV637263 | HC070g11  | RNA helicase                                                 | <i>Arabidopsis thaliana</i>          | 151.6  | 68.1   | 110.8  | 0.5  | 0.2 | 0.6 | 0.3 |
| 2150 | 019e12 | AV620041 | LC016g07  | RNA helicase isolog                                          | <i>Arabidopsis thaliana</i>          | 4.7    | 7.2    | 4.9    | 1.6  | 0.4 | 1.5 | 0.5 |
| 2151 | 017a01 | AV642731 | HCL056h06 | RNA helicase isolog                                          | <i>Arabidopsis thaliana</i>          | 10.4   | 16.7   | 11.7   | 1.6  | 0.3 | 1.4 | 0.2 |
| 2152 | 028c10 | AV629848 | LCL067e01 | RNA helicase isolog                                          | <i>Arabidopsis thaliana</i>          | 17.6   | 11.1   | 17.4   | 0.6  | 0.0 | 0.6 | 0.1 |
| 2153 | 024d06 | AV626528 | LCL010f06 | RNA polymerase II                                            | <i>Buddleja asiatica</i>             | 10.0   | 9.2    | 8.6    | 1.0  | 0.3 | 1.1 | 0.3 |
| 2154 | 109d07 | AV387541 | CM026c11  | RNA polymerase II 13.6 kDa subunit                           | <i>Arabidopsis thaliana</i>          | 7.1    | 9.3    | 6.2    | 1.3  | 0.2 | 1.5 | 0.4 |
| 2155 | 139f09 | AV623256 | LC061b06  | RNA polymerase II subunit 9                                  | <i>Drosophila melanogaster</i>       | 5.3    | 9.5    | 4.2    | 1.9  | 0.8 | 2.2 | 0.4 |
| 2156 | 112f08 | AV392150 | CM058g10  | RNA polymerase sigma factor                                  | <i>Synechocystis sp. PCC 6803</i>    | 10.2   | 9.9    | 9.8    | 1.0  | 0.2 | 1.0 | 0.1 |
| 2157 | 115g11 | AV391588 | CM092b11  | RNA polymerase subunit                                       | <i>Arabidopsis thaliana</i>          | 8.3    | 6.0    | 9.3    | 0.7  | 0.0 | 0.7 | 0.2 |
| 2158 | 114f11 | AV389777 | CM079d12  | RNA-binding protein                                          | <i>Arabidopsis thaliana</i>          | 164.4  | 120.2  | 139.9  | 0.7  | 0.0 | 0.9 | 0.1 |
| 2159 | 106f11 | AV397881 | CM002f12  | RNA-binding protein-like                                     | <i>Arabidopsis thaliana</i>          | 9.9    | 19.4   | 9.7    | 1.8  | 0.6 | 1.9 | 1.2 |
| 2160 | 009g04 | AV392298 | CM098a09  | RNApolymerase I largest subunit                              | <i>Schizosaccharomyces pombe</i>     | 196.7  | 110.3  | 122.9  | 0.7  | 0.5 | 0.9 | 0.6 |
| 2161 | 141a12 | AV624289 | LC075f07  | RNApolymerase II                                             | <i>Glycine max</i>                   | 31.9   | 23.1   | 19.8   | 0.7  | 0.1 | 1.2 | 0.2 |
| 2162 | 132d01 | AV644663 | HCL091h05 | RNase L inhibitor-like protein                               | <i>Arabidopsis thaliana</i>          | 54.5   | 51.9   | 34.5   | 1.0  | 0.1 | 1.6 | 0.3 |
| 2163 | 035h08 | BP097503 | MXL076h08 | Ro ribonucleoprotein autoantigen                             | <i>Caenorhabditis elegans</i>        | 25.3   | 46.3   | 25.7   | 1.8  | 1.3 | 2.5 | 2.3 |
| 2164 | 008c08 | AV393240 | CM068f07  | Rod protein domain-contained                                 | <i>Chlamydomonas reinhardtii</i>     | 9.1    | 12.0   | 7.6    | 1.4  | 0.1 | 1.5 | 0.6 |
| 2165 | 114g10 | AV389889 | CM081c04  | Rod protein domain-contained                                 | <i>Chlamydomonas reinhardtii</i>     | 13.8   | 15.7   | 10.8   | 1.2  | 0.1 | 1.5 | 0.5 |
| 2166 | 015f06 | AV641272 | HCL030h01 | root hair defective 3                                        | <i>Arabidopsis thaliana</i>          | 6.9    | 5.3    | 5.2    | 0.9  | 0.4 | 0.9 | 0.2 |
| 2167 | 151e10 | AV629572 | LCL061c01 | root hair defective 3                                        | <i>Arabidopsis thaliana</i>          | 35.1   | 28.1   | 53.6   | 0.8  | 0.3 | 0.5 | 0.1 |
| 2168 | 151c03 | AV629397 | LCL058a03 | ROP-1 ribonucleoprotein RO autoantigen                       | <i>Caenorhabditis elegans</i>        | 15.1   | 37.8   | 8.3    | 2.5  | 2.2 | 4.8 | 4.2 |
| 2169 | 025d09 | AV627334 | LCL025b11 | ROP-1 ribonucleoprotein RO autoantigen                       | <i>Caenorhabditis elegans</i>        | 21.0   | 40.7   | 13.2   | 2.0  | 1.8 | 4.0 | 4.2 |
| 2170 | 029b01 | AV630590 | LCL081b11 | ROP-1 ribonucleoprotein RO autoantigen                       | <i>Caenorhabditis elegans</i>        | 11.8   | 37.7   | 12.8   | 3.1  | 1.7 | 3.6 | 3.2 |
| 2171 | 007b08 | AV391258 | CM052d08  | rp528                                                        | <i>Hordeum vulgare</i>               | 24.5   | 22.7   | 24.5   | 0.9  | 0.1 | 0.9 | 0.1 |
| 2172 | 001g01 | AV394191 | CL19h07   | R56/L7A ribosomal protein homolog                            | <i>Schizosaccharomyces pombe</i>     | 137.3  | 162.3  | 89.7   | 1.2  | 0.4 | 1.9 | 0.7 |
| 2173 | 030a06 | AV395998 | CL53b09   | S642a.fluorocitrate complex of aconitase                     | <i>Bos taurus</i>                    | 175.6  | 196.2  | 128.8  | 1.1  | 0.0 | 1.7 | 0.9 |
| 2174 | 105f01 | AV396759 | CL68b03   | S-adenosyl-L-homocystein hydrolase; SAH                      | <i>Mesembryanthemum crystallinum</i> | 76.6   | 70.8   | 55.3   | 0.9  | 0.1 | 1.3 | 0.3 |
| 2175 | 003d04 | AV391538 | CM055b02  | S-adenosyl-L-homocystein hydrolase; SAH                      | <i>Mesembryanthemum crystallinum</i> | 101.0  | 89.1   | 73.1   | 0.9  | 0.2 | 1.3 | 0.3 |
| 2176 | 034d09 | BP094374 | MXL022b11 | S-adenosyl-L-methionine decarboxylase                        | <i>Dendrobium crumenatum</i>         | 34.8   | 16.4   | 21.3   | 0.5  | 0.1 | 0.8 | 0.2 |
| 2177 | 032c02 | BP093058 | MXL002g07 | S-adenosylmethionin decarboxylase preozyme                   |                                      | 28.3   | 9.0    | 12.8   | 0.3  | 0.1 | 0.7 | 0.1 |
| 2178 | 110h04 | AV389899 | CM040d10  | S-adenosylmethionine synthetase                              | <i>Chlamydomonas reinhardtii</i>     | 183.1  | 130.5  | 126.9  | 0.7  | 0.1 | 1.1 | 0.4 |
| 2179 | 10e0e6 | AV632953 | HC014g12  | S-adenosylmethionine synthetase 1                            | <i>Chlamydomonas reinhardtii</i>     | 229.5  | 149.3  | 161.5  | 0.7  | 0.0 | 1.0 | 0.2 |
| 2180 | 123a02 | AV639080 | HC094g05  | S-adenosylmethionine:2-demethylmenaquinone methyltransferase | <i>Deinococcus radiodurans</i>       | 8.5    | 7.4    | 7.6    | 0.9  | 0.2 | 1.0 | 0.3 |
| 2181 | 130e04 | AV643523 | HCL071b05 | SAICAR synthetase                                            | <i>Arabidopsis thaliana</i>          | 6.9    | 7.9    | 6.7    | 1.2  | 0.5 | 1.3 | 0.6 |
| 2182 | 167a01 | BP095847 | MXL048c06 | Salivary cellulase                                           | <i>Reticulitermes speratus</i>       | 10.4   | 16.0   | 8.6    | 1.6  | 0.2 | 2.3 | 1.2 |
| 2183 | 022b11 | AV623507 | LC064g11  | SAR DNA binding protein, putative                            | <i>Arabidopsis thaliana</i>          | 128.8  | 55.5   | 44.4   | 0.4  | 0.3 | 1.2 | 0.7 |
| 2184 | 005d03 | AV387891 | CM022f09  | SAR DNA binding protein, putative                            | <i>Arabidopsis thaliana</i>          | 46.0   | 24.3   | 17.9   | 0.5  | 0.3 | 1.3 | 0.5 |
| 2185 | 016e07 | AV642279 | HCL048h06 | SAR DNA-binding protein-1                                    | <i>Pisum sativum</i>                 | 51.9   | 20.9   | 17.2   | 0.5  | 0.4 | 1.2 | 0.4 |
| 2186 | 020c04 | AV620859 | LC027g07  | SecY homolog                                                 | <i>Arabidopsis thaliana</i>          | 34.4   | 16.4   | 27.0   | 0.5  | 0.2 | 0.6 | 0.3 |
| 2187 | 005f03 | AV387597 | CM027a08  | Sedoheptulose-bisphosphatase                                 | <i>Chlamydomonas reinhardtii</i>     | 63.3   | 47.8   | 59.4   | 0.8  | 0.2 | 0.8 | 0.1 |
| 2188 | 032a11 | BP087739 | MX042i03  | Sedoheptulose-bisphosphatase                                 | <i>Chlamydomonas reinhardtii</i>     | 135.0  | 86.0   | 109.9  | 0.6  | 0.2 | 0.8 | 0.3 |
| 2189 | 119b07 | AV634673 | HC036c11  | Sedoheptulose-bisphosphatase                                 | <i>Chlamydomonas reinhardtii</i>     | 101.1  | 69.6   | 77.6   | 0.7  | 0.1 | 0.9 | 0.3 |
| 2190 | 165e02 | BP095209 | MXL038a11 | Selectin, endothelial cell, ligand                           | <i>Mus musculus</i>                  | 21.2   | 21.4   | 24.4   | 1.0  | 0.1 | 0.9 | 0.1 |
| 2191 | 025b02 | AV627098 | LCL021a12 | Selenium-binding liver protein                               | <i>Mus musculus</i>                  | 13.1   | 18.8   | 19.8   | 1.5  | 0.4 | 1.0 | 0.4 |
| 2192 | 160e11 | BP088749 | MX067h05  | Semenogelin II precursor                                     | <i>Macaca mulatta</i>                | 22.5   | 21.3   | 29.0   | 0.9  | 0.1 | 0.7 | 0.1 |
| 2193 | 142b11 | AV624994 | LC085e04  | Senescence-associated protein (SAG29)                        | <i>Arabidopsis thaliana</i>          | 7.3    | 78.8   | 31.1   | 10.8 | 4.8 | 2.5 | 1.0 |
| 2194 | 136f10 | AV620816 | LC027c02  | Senescence-associated protein sen1                           | <i>Arabidopsis thaliana</i>          | 8.3    | 8.4    | 8.9    | 1.0  | 0.2 | 1.0 | 0.4 |
| 2195 | 034e12 | BP095998 | MXL050g08 | Sensory histidine protein kinase                             | <i>Calothrix viguieri</i>            | 7.2    | 8.6    | 7.2    | 1.2  | 0.2 | 1.2 | 0.2 |
| 2196 | 114a03 | AV388708 | CM072b07  | Ser/Thr protein phosphatase homologous to PP2A               | <i>Malus domestica</i>               | 5.6    | 8.0    | 7.6    | 1.5  | 0.5 | 1.1 | 0.3 |
| 2197 | 027f03 | AV624023 | LC071h06  | Serine hydroxymethyltransferase                              | <i>Chlamydomonas reinhardtii</i>     | 21.4   | 70.8   | 75.9   | 3.3  | 0.7 | 1.0 | 0.3 |
| 2198 | 159g02 | BP088019 | MX049f03  | Serine hydroxymethyltransferase                              | <i>Chlamydomonas reinhardtii</i>     | 29.8   | 72.3   | 97.2   | 2.6  | 0.9 | 0.7 | 0.1 |
| 2199 | 002d10 | AV395337 | CL40d01   | Serine protease                                              | <i>Aquifex aeolicus</i>              | 9.9    | 5.7    | 9.3    | 0.6  | 0.2 | 0.6 | 0.1 |
| 2200 | 008d08 | AV387615 | CM069e03  | Serine/threonin protein phosphatase PP1 isozyme 2            | <i>Chlamydomonas reinhardtii</i>     | 25.2   | 30.9   | 30.0   | 1.2  | 0.1 | 1.1 | 0.4 |
| 2201 | 146e04 | AV627122 | LCL021d11 | Serine/threonin protein phosphatase PP2A-1 catalytic subunit | <i>Acetabularia cliftonii</i>        | 25.2   | 25.2   | 26.1   | 1.0  | 0.3 | 1.1 | 0.4 |
| 2202 | 151e02 | AV641137 | HCL028d03 | Serine/threonine- and tyrosine-specificprotein kinase        | <i>Mus sp.</i>                       | 40.0   | 39.5   | 48.7   | 1.0  | 0.1 | 0.9 | 0.2 |
| 2203 | 001h05 | AV394622 | CL26c10   | Serine/threonine kinase                                      | <i>Arabidopsis thaliana</i>          | 2.6    | 3.3    | 2.1    | 1.5  | 0.4 | 1.5 | 0.8 |
| 2204 | 151c06 | AV629410 | LCL058c07 | Serine/threonine kinase                                      | <i>Arabidopsis thaliana</i>          | 16.3   | 12.1   | 18.9   | 0.7  | 0.2 | 0.8 | 0.4 |
| 2205 | 027e01 | AV629206 | LCL054d05 | Serine/threonine kinase AIE1                                 | <i>Mus musculus</i>                  | 24.1   | 24.5   | 21.4   | 1.0  | 0.1 | 1.5 | 0.8 |
| 2206 | 002g11 | AV397741 | CL49g08   | Serine/threonine protein kinase                              | <i>Homo sapiens</i>                  | 3.7    | 5.5    | 5.8    | 1.4  | 0.6 | 0.9 | 0.5 |
| 2207 | 029c07 | AV630743 | LCL083f04 | Serine-glyoxylate aminotransferase                           | <i>Methylobacterium extorquens</i>   | 6.1    | 7.1    | 4.5    | 1.2  | 0.1 | 1.7 | 0.5 |
| 2208 | 021c08 | AV622166 | LC046a07  | Serine-glyoxylate aminotransferase                           | <i>Methylobacterium extorquens</i>   | 9.3    | 58.5   | 51.5   | 6.3  | 1.2 | 1.1 | 0.1 |
| 2209 | 143f02 | AV625818 | LC098c08  | Serine-pyruvate aminotransferase, mitochondrial              | <i>Drosophila melanogaster</i>       | 21.7   | 32.0   | 27.3   | 1.5  | 0.1 | 1.2 | 0.2 |
| 2210 | 141d03 | AV624438 | LC077g04  | Seryl-tRNA synthetase                                        | <i>Helianthus annuus</i>             | 26.9   | 18.3   | 15.4   | 0.7  | 0.3 | 1.4 | 0.6 |
| 2211 | 015d03 | AV641072 | HCL027c06 | Seryl-tRNA synthetase                                        | <i>Helianthus annuus</i>             | 16.0   | 10.4   | 8.0    | 0.7  | 0.2 | 1.3 | 0.1 |
| 2212 | 102c02 | AV394294 | CL20b02   | Shaggy kinase homolog                                        | <i>Zea mays</i>                      | 19.0   | 27.6   | 24.5   | 1.5  | 0.2 | 1.1 | 0.1 |
| 2213 | 117a04 | AV632085 | HC003g01  | Signal recognition particle 14 kD protein                    | <i>Oryza sativa</i>                  | 7.2    | 7.6    | 7.7    | 1.2  | 0.5 | 1.0 | 0.2 |
| 2214 | 009e12 | AV391065 | CM088e07  | Signal recognition particle 54 kDa subunit                   | <i>Hordeum vulgare</i>               | 7.2    | 6.1    | 5.9    | 0.8  | 0.0 | 1.0 | 0.3 |
| 2215 | 001d10 | AV393918 | CL13e01   | Signal recognition particle 54kD                             | <i>Mus musculus</i>                  | 5.2    | 5.1    | 7.1    | 1.0  | 0.1 | 0.7 | 0.2 |
| 2216 | 029g11 | AV631113 | LCL089a09 | Signal recognition particle receptor-like protein            | <i>Arabidopsis thaliana</i>          | 13.4   | 11.8   | 12.8   | 0.9  | 0.2 | 0.9 | 0.1 |
| 2217 | 020g08 | AV621457 | LC036g07  | Signal sequence receptor alpha subunit                       | <i>Oncorhynchus mykiss</i>           | 21.0   | 15.4   | 21.1   | 0.8  | 0.4 | 0.9 | 0.4 |
| 2218 | 006c03 | AV398546 | CM038c03  | SIK1P protein-like                                           | <i>Arabidopsis thaliana</i>          | 8.1    | 11.1   | 8.6    | 1.4  | 0.2 | 1.3 | 0   |

|      | A      | B        | C         | D                                                               | E                                | F     | G     | H     | I   | J   | K     | L   |
|------|--------|----------|-----------|-----------------------------------------------------------------|----------------------------------|-------|-------|-------|-----|-----|-------|-----|
| 2245 | 170e05 | BP097447 | MXL075h06 | Similar to squalene monooxygenase                               | <i>Arabidopsis thaliana</i>      | 19.1  | 25.1  | 25.0  | 1.3 | 0.1 | 1.1   | 0.3 |
| 2246 | 007f11 | AV392169 | CM058h04  | Similar to the 20.2kd protein                                   | <i>Escherichia coli</i>          | 14.9  | 12.6  | 21.6  | 0.9 | 0.2 | 0.7   | 0.4 |
| 2247 | 141b01 | AV624294 | LC075g01  | Similar to thioredoxin-like protein                             | <i>Arabidopsis thaliana</i>      | 15.0  | 14.1  | 14.5  | 1.0 | 0.3 | 1.0   | 0.1 |
| 2248 | 125b06 | AV640449 | HCL016e06 | Similar to translational activator                              | <i>Arabidopsis thaliana</i>      | 5.8   | 5.1   | 6.9   | 0.9 | 0.2 | 0.7   | 0.1 |
| 2249 | 026a05 | AV628380 | LCL040h01 | Similar to ubiquitin-conjugating enzyme E2-17 KD                | <i>Arabidopsis thaliana</i>      | 30.0  | 24.2  | 28.0  | 0.8 | 0.2 | 1.0   | 0.6 |
| 2250 | 007c12 | AV391459 | CM054g03  | similarity to AMP-activated protein kinase beta                 | <i>Arabidopsis thaliana</i>      | 4.3   | 4.9   | 4.3   | 1.2 | 0.1 | 1.1   | 0.1 |
| 2251 | 030g12 | BP086202 | MX003h08  | Similarity to ycf37 gene product                                | <i>Arabidopsis thaliana</i>      | 7.7   | 10.4  | 14.3  | 1.3 | 0.2 | 0.7   | 0.1 |
| 2252 | 025b01 | AV627093 | LCL021a04 | SKD1-homolog                                                    | <i>Homo sapiens</i>              | 8.8   | 39.3  | 20.2  | 4.3 | 1.4 | 1.9   | 0.6 |
| 2253 | 031g06 | BP087322 | MX031h02  | S-locus protein 7                                               | <i>Brassica rapa</i>             | 7.4   | 8.6   | 7.7   | 1.1 | 0.2 | 1.1   | 0.2 |
| 2254 | 014a06 | AV640427 | HCL016b05 | Small glutamine-rich tetratricopeptide repeatcontaining protein | <i>Saccharomyces cerevisiae</i>  | 143.9 | 151.5 | 92.1  | 1.1 | 0.2 | 1.7   | 0.5 |
| 2255 | 026g01 | AV628517 | LCL043b04 | Small GTP-binding protein ARF                                   | <i>Brassica rapa</i>             | 12.0  | 8.9   | 9.9   | 0.8 | 0.2 | 1.0   | 0.4 |
| 2256 | 031d06 | BP086855 | MX018e10  | Small nuclear ribonucleoprotein D2 polypeptide                  | <i>Homo sapiens</i>              | 18.0  | 11.7  | 15.6  | 0.7 | 0.1 | 0.8   | 0.2 |
| 2257 | 022b03 | AV623461 | LC064b03  | Small zinc finger-like protein                                  | <i>Rattus norvegicus</i>         | 27.8  | 18.0  | 23.3  | 0.7 | 0.1 | 0.8   | 0.3 |
| 2258 | 017g02 | AV643603 | HCL072e11 | SMAP                                                            | <i>Homo sapiens</i>              | 4.2   | 7.6   | 4.1   | 2.0 | 0.9 | 1.9   | 0.7 |
| 2259 | 172g01 | BP098504 | BP0984d01 | SMD cross-reacting protein                                      | <i>Mus musculus</i>              | 16.5  | 11.1  | 16.3  | 0.7 | 0.4 | 0.9   | 0.7 |
| 2260 | 129b10 | BP098746 | MXL098d07 | Sodium/sulfate symporter                                        | <i>Bacillus halodurans</i>       | 8.4   | 23.7  | 21.9  | 3.4 | 2.4 | 1.0   | 0.2 |
| 2261 | 034a08 | BP095215 | MXL038b10 | Sodium/sulfate symporter                                        | <i>Bacillus halodurans</i>       | 6.1   | 12.2  | 17.7  | 2.1 | 1.7 | 0.6   | 0.4 |
| 2262 | 160b06 | BP088378 | MX059a01  | Soluble inorganic pyrophosphatase                               | <i>Chlamydomonas reinhardtii</i> | 39.7  | 18.5  | 19.7  | 0.5 | 0.2 | 1.2   | 1.0 |
| 2263 | 022d12 | AV623840 | LC069d07  | Soluble starch synthase                                         | <i>Chlamydomonas reinhardtii</i> | 8.1   | 22.1  | 31.3  | 2.7 | 1.0 | 1.7   | 0.2 |
| 2264 | 123h02 | BP098683 | MXL097d01 | Soluble starch synthase mRNA                                    | <i>Chlamydomonas reinhardtii</i> | 24.3  | 79.1  | 54.0  | 3.3 | 0.8 | 0.4   | 0.3 |
| 2265 | 024g06 | AV626796 | LCL015e10 | Somatostatin receptor interacting proteinsplice variant a       | <i>Homo sapiens</i>              | 7.4   | 17.0  | 14.7  | 2.3 | 0.6 | 1.1   | 0.1 |
| 2266 | 020e11 | AV621178 | LC032c11  | Splicing factor SR1D                                            | <i>Arabidopsis thaliana</i>      | 77.9  | 43.7  | 72.3  | 0.6 | 0.1 | 0.6   | 0.1 |
| 2267 | 028c09 | AV629847 | LCL067d09 | Splicing factor-like                                            | <i>Caenorhabditis elegans</i>    | 14.3  | 16.9  | 10.0  | 1.2 | 0.1 | 1.7   | 0.3 |
| 2268 | 031f06 | BP087208 | MX028b08  | SPP30                                                           | <i>Solanum chacoense</i>         | 8.2   | 8.9   | 11.4  | 1.1 | 0.3 | 0.8   | 0.3 |
| 2269 | 109h07 | AV388647 | CM031b01  | SPP30                                                           | <i>Solanum chacoense</i>         | 528.7 | 206.1 | 428.9 | 0.4 | 0.1 | 0.5   | 0.1 |
| 2270 | 010d01 | AV632854 | HC010h10  | Starch branching enzyme IIa                                     | <i>Hordeum vulgare</i>           | 6.4   | 15.7  | 16.1  | 2.4 | 0.8 | 1.0   | 0.2 |
| 2271 | 025h02 | AV627888 | LCL033d07 | Starch synthase                                                 | <i>Triticum aestivum</i>         | 28.2  | 23.7  | 20.9  | 1.0 | 0.3 | 1.1   | 0.4 |
| 2272 | 031d10 | BP086883 | MX019e04  | Starch synthase                                                 | <i>Chlamydomonas reinhardtii</i> | 18.4  | 18.3  | 19.7  | 1.1 | 0.3 | 0.9   | 0.2 |
| 2273 | 112b09 | BP098648 | MXL096h08 | Starch synthase I                                               | <i>Chlamydomonas reinhardtii</i> | 21.3  | 63.1  | 50.8  | 3.0 | 0.6 | 1.5   | 0.9 |
| 2274 | 011a12 | AV632135 | HC004d04  | Starch synthase I                                               | <i>Chlamydomonas reinhardtii</i> | 22.2  | 70.6  | 56.1  | 3.4 | 1.7 | 1.4   | 0.8 |
| 2275 | 032h11 | BP093807 | MXL014a11 | Starch synthase isoform SS III                                  | <i>Vigna unguiculata</i>         | 7.5   | 7.8   | 10.1  | 1.0 | 0.3 | 0.8   | 0.4 |
| 2276 | 017h12 | AV644023 | HCL080d07 | Ste20-like kinase homolog                                       | <i>Arabidopsis thaliana</i>      | 4.3   | 3.3   | 3.1   | 0.7 | 0.2 | 1.2   | 0.9 |
| 2277 | 016e09 | AV642299 | HCL049c03 | Sterol 14-demethylase                                           | <i>Oryza sativa</i>              | 7.2   | 4.7   | 6.7   | 0.7 | 0.1 | 0.7   | 0.2 |
| 2278 | 004a02 | AV386522 | CM001d05  | Sterol C-methyltransferase                                      | <i>Arabidopsis thaliana</i>      | 22.2  | 16.3  | 16.1  | 0.8 | 0.2 | 1.0   | 0.1 |
| 2279 | 021b05 | AV622014 | LC043h08  | Sterol-C5-desaturase                                            | <i>Arabidopsis thaliana</i>      | 412.9 | 380.8 | 271.2 | 0.9 | 0.1 | 1.4   | 0.4 |
| 2280 | 143g01 | AV625918 | LC099g12  | Sterol-C-methyltransferase                                      | <i>Arabidopsis thaliana</i>      | 38.0  | 46.6  | 30.4  | 1.3 | 0.4 | 1.7   | 0.6 |
| 2281 | 114f09 | AV389612 | CM079b09  | Sterol-C-methyltransferase                                      | <i>Arabidopsis thaliana</i>      | 19.6  | 13.2  | 12.6  | 0.7 | 0.1 | 1.2   | 0.5 |
| 2282 | 008g09 | AV389558 | CM076d07  | Sterol-C-methyltransferase                                      | <i>Arabidopsis thaliana</i>      | 19.0  | 14.0  | 19.2  | 0.8 | 0.3 | 0.7   | 0.2 |
| 2283 | 113b01 | AV392745 | CM063d03  | Sti (Stress inducible protein)                                  | <i>Glycine max</i>               | 7.7   | 9.5   | 8.0   | 1.3 | 0.7 | 1.3   | 0.7 |
| 2284 | 147f05 | AV627615 | LCL029e07 | STK13                                                           | <i>Homo sapiens</i>              | 10.9  | 15.6  | 11.5  | 1.5 | 0.3 | 1.4   | 0.2 |
| 2285 | 157a10 | BP086567 | MX011g01  | stress protein                                                  | <i>Arabidopsis thaliana</i>      | 10.6  | 15.0  | 6.8   | 1.4 | 0.8 | 2.8   | 2.2 |
| 2286 | 166c10 | BP095584 | MXL044b09 | Stress-induced protein sti1-like protein                        | <i>Arabidopsis thaliana</i>      | 14.2  | 11.3  | 8.5   | 0.8 | 0.3 | 1.4   | 0.6 |
| 2287 | 023d06 | AV625079 | LC087e10  | Stromal cell-derived factor 2                                   | <i>Mus musculus</i>              | 26.9  | 17.9  | 26.9  | 0.7 | 0.2 | 0.8   | 0.5 |
| 2288 | 018f04 | AV619016 | LC002i05  | Structural wall protein                                         | <i>Chlamydomonas reinhardtii</i> | 15.8  | 20.8  | 6.6   | 2.0 | 1.2 | 3.2   | 0.9 |
| 2289 | 117d12 | AV632734 | HC011h11  | submergence induced protein 2A                                  | <i>Oryza sativa</i>              | 9.8   | 9.3   | 6.9   | 0.9 | 0.2 | 1.3   | 0.1 |
| 2290 | 122e02 | AV638381 | HC065i09  | Succinate dehydrogenase flavoprotein alpha subunit              | <i>Arabidopsis thaliana</i>      | 29.8  | 30.7  | 25.3  | 1.0 | 0.0 | 1.3   | 0.5 |
| 2291 | 016c01 | AV641852 | HCL041d03 | Succinate dehydrogenase flavoprotein alpha subunit              | <i>Arabidopsis thaliana</i>      | 3.7   | 5.7   | 4.8   | 1.6 | 0.4 | 1.3   | 0.4 |
| 2292 | 006e05 | AV390045 | CM041f07  | Succinate dehydrogenase iron-sulfur subunit                     | <i>Agaricus bisporus</i>         | 31.5  | 27.6  | 34.2  | 0.9 | 0.0 | 0.8   | 0.1 |
| 2293 | 010h09 | AV633792 | HC025c09  | Succinyl-CoA-ligase alpha subunit                               | <i>Arabidopsis thaliana</i>      | 12.0  | 8.9   | 9.1   | 0.7 | 0.1 | 1.0   | 0.4 |
| 2294 | 005f04 | AV387601 | CM027a11  | Succinyl-CoA-ligase beta subunit                                | <i>Arabidopsis thaliana</i>      | 16.3  | 14.6  | 10.5  | 0.9 | 0.2 | 1.4   | 0.2 |
| 2295 | 007f05 | AV392075 | CM058b09  | Succinyl-CoA-ligase beta subunit                                | <i>Arabidopsis thaliana</i>      | 11.1  | 10.6  | 8.0   | 1.0 | 0.3 | 1.3   | 0.2 |
| 2296 | 128b01 | AV642162 | HCL046f08 | Sulfated surface glycoprotein SSG185                            | <i>Volvox carteri</i>            | 11.8  | 12.7  | 11.0  | 1.1 | 0.1 | 1.2   | 0.2 |
| 2297 | 032e10 | BP093461 | MXL008g02 | Sulfated surface glycoprotein SSG185                            | <i>Volvox carteri</i>            | 63.1  | 34.3  | 30.5  | 0.5 | 0.2 | 1.1   | 0.4 |
| 2298 | 013c02 | AV638222 | HC083e03  | Sulfated surface glycoprotein SSG185                            | <i>Volvox carteri</i>            | 14.8  | 11.3  | 10.5  | 0.8 | 0.2 | 1.1   | 0.2 |
| 2299 | 168d07 | BP096485 | MXL059e05 | Sulfated surface glycoprotein SSG185                            | <i>Volvox carteri</i>            | 12.4  | 8.6   | 14.8  | 0.7 | 0.1 | 0.6   | 0.2 |
| 2300 | 026g12 | AV628571 | LCL043h08 | Sulfite reductase, ferredoxin                                   | <i>Arabidopsis thaliana</i>      | 50.5  | 66.1  | 56.0  | 1.5 | 0.9 | 1.2   | 0.4 |
| 2301 | 005d07 | AV387788 | CM023h12  | Sulfolipid biosynthesis protein                                 | <i>Arabidopsis thaliana</i>      | 28.8  | 17.6  | 23.2  | 0.6 | 0.2 | 0.8   | 0.3 |
| 2302 | 143c02 | AV625636 | LC095g05  | Sulfur deprivation response regulator                           | <i>Chlamydomonas reinhardtii</i> | 9.2   | 14.0  | 7.2   | 1.5 | 0.2 | 2.1   | 0.4 |
| 2303 | 146e01 | AV627109 | LCL021c04 | Sulfur deprivation response regulator                           | <i>Chlamydomonas reinhardtii</i> | 10.0  | 13.4  | 7.1   | 1.3 | 0.2 | 1.9   | 0.5 |
| 2304 | 012a11 | AV636058 | HC065f08  | Sulfur deprivation response regulator                           | <i>Chlamydomonas reinhardtii</i> | 6.4   | 7.7   | 5.5   | 1.3 | 0.7 | 1.6   | 0.9 |
| 2305 | 028h04 | AV630347 | LCL077f05 | Sulfur deprivation response regulator                           | <i>Chlamydomonas reinhardtii</i> | 1.3   | 1.5   | 1.3   | 1.1 | 0.2 | 1.3   | 0.5 |
| 2306 | 017d01 | AV643114 | HCL064a04 | Sulfur deprivation response regulator                           | <i>Chlamydomonas reinhardtii</i> | 2.0   | 9.9   | 11.3  | 5.1 | 2.4 | 0.9   | 0.3 |
| 2307 | 145b06 | AV626537 | LCL010h02 | Sulfur stress regulator                                         | <i>Chlamydomonas reinhardtii</i> | 28.4  | 26.5  | 19.2  | 0.9 | 0.1 | 1.4   | 0.2 |
| 2308 | 015c02 | AV640848 | HCL023d08 | Sulfur stress regulator                                         | <i>Chlamydomonas reinhardtii</i> | 1.4   | 2.1   | 2.1   | 1.5 | 0.1 | 1.1   | 0.3 |
| 2309 | 009d03 | AV391095 | CM088h01  | Sulfur stress regulator                                         | <i>Chlamydomonas reinhardtii</i> | 8.3   | 10.4  | 11.3  | 1.3 | 0.1 | 1.0   | 0.4 |
| 2310 | 151f01 | AV629589 | LCL061e09 | Sulfur stress regulator                                         | <i>Chlamydomonas reinhardtii</i> | 25.6  | 20.8  | 24.8  | 0.8 | 0.1 | 0.9   | 0.2 |
| 2311 | 166h09 | BP095819 | MXL047h07 | Sulfur stress regulator                                         | <i>Chlamydomonas reinhardtii</i> | 27.7  | 20.5  | 30.0  | 0.7 | 0.3 | 0.7   | 0.5 |
| 2312 | 108c08 | BP098637 | MXL096g03 | Sulfur stress regulator                                         | <i>Chlamydomonas reinhardtii</i> | 13.6  | 9.3   | 23.6  | 0.7 | 0.1 | 0.6   | 0.4 |
| 2313 | 003c08 | AV396249 | CL58g11   | Super cysteine rich protein; SCRIP                              | <i>Homo sapiens</i>              | 162.1 | 160.6 | 107.8 | 1.0 | 0.2 | 1.5   | 0.4 |
| 2314 | 102a09 | AV394067 | CL18a10   | Super cysteine rich protein; SCRIP                              | <i>Homo sapiens</i>              | 11.9  | 9.0   | 6.1   | 0.8 | 0.2 | 1.4   | 0.6 |
| 2315 | 036g06 | BP098671 | MXL097b11 | Super cysteine rich protein; SCRIP                              | <i>Homo sapiens</i>              | 11.3  | 11.1  | 9.0   | 1.0 | 0.2 | 1.3   | 0.6 |
| 2316 | 028g01 | AV630222 | LCL075f05 | Super cysteine rich protein; SCRIP                              | <i>Homo sapiens</i>              | 15.1  | 12.6  | 11.9  | 0.8 | 0.1 | 1.3   | 0.4 |
| 2317 | 125g12 | AV640813 | HCL022h01 | Super cysteine rich protein; SCRIP                              | <i>Homo sapiens</i>              | 10.0  | 13.4  | 11.8  | 1.3 | 0.2 | 1.1   | 0.1 |
| 2318 | 108e03 | AV387352 | CM019h11  | Super cysteine rich protein; SCRIP                              | <i>Homo sapiens</i>              | 11.0  | 12.9  | 14.5  | 1.2 | 0.1 | 1.0   | 0.4 |
| 2319 | 025a05 | AV626988 | LCL019d06 | Super cysteine rich protein; SCRIP                              | <i>Homo sapiens</i>              | 7.8   | 4.9   | 5.7   | 0.6 | 0.1 | 0.9   | 0.3 |
| 2320 | 153f05 | AV630576 | LCL081a03 | Super cysteine rich protein; SCRIP                              | <i>Homo sapiens</i>              | 14.2  | 10.9  | 15.3  | 0.8 | 0.3 | 0.8   | 0.2 |
| 2321 | 143d07 | AV625698 | LC096f02  | Super cysteine rich protein; SCRIP                              | <i>Homo sapiens</i>              | 12.1  | 10.9  | 14.6  | 0.9 | 0.2 | 0.8   | 0.0 |
| 2322 | 125c08 | AV640530 | HCL017h05 | Super cysteine rich protein; SCRIP                              | <i>Homo sapiens</i>              | 16.4  | 13.8  | 19.5  | 0.8 | 0.1 | 0.7   | 0.2 |
| 2323 | 121b06 | AV636879 | HC065e08  | Superoxide dismutase                                            | <i>Chlamydomonas reinhardtii</i> | 35.8  | 61.2  | 61.5  | 1.7 | 0.5 | 1.1   | 0.3 |
| 2324 | 122g09 | AV638889 | HC092b04  | Survival protein SurE                                           | <i>Deinococcus radiodurans</i>   | 9.4   | 7.8   | 9.1   | 0.8 | 0.3 | 0.8   | 0.3 |
| 2325 | 138a01 | AV622005 | LC043g07  | Synaptic glycoprotein SC2-like protein                          | <i>Arabidopsis thaliana</i>      | 532.2 | 268.7 | 220.1 | 0.5 | 0.3 | 1.2   | 0.9 |
| 2326 | 130g07 | AV643691 | HCL074c04 | Synaptobrevin-like protein                                      | <i>Arabidopsis thaliana</i>      | 8.4   | 11.2  | 12.1  | 1.3 | 0.3 | 0.9</ |     |

|      | A      | B        | C         | D                                                                  | E                                        | F     | G     | H     | I   | J   | K   | L   |
|------|--------|----------|-----------|--------------------------------------------------------------------|------------------------------------------|-------|-------|-------|-----|-----|-----|-----|
| 2352 | 008e12 | AV388644 | CM071h02  | Thioredoxin peroxidase                                             | <i>Secale cereale</i>                    | 29.7  | 30.9  | 40.3  | 1.0 | 0.0 | 0.8 | 0.2 |
| 2353 | 170a02 | BP097198 | MXL071f09 | Thioredoxin peroxidase                                             | <i>Chlamydomonas reinhardtii</i>         | 71.9  | 113.8 | 85.4  | 1.6 | 0.8 | 2.9 | 2.8 |
| 2354 | 010h07 | AV633771 | HC025a07  | Thioredoxin reductase (NADPH) 2                                    | <i>Arabidopsis thaliana</i>              | 9.7   | 9.1   | 13.6  | 0.9 | 0.3 | 0.7 | 0.2 |
| 2355 | 027b01 | AV628812 | LCL047e01 | Thioredoxin reductase (NADPH) B                                    | <i>Arabidopsis thaliana</i>              | 17.8  | 16.8  | 10.5  | 0.9 | 0.1 | 1.7 | 0.5 |
| 2356 | 144c10 | AV626223 | LCL004f01 | Thioredoxin reductase 3                                            | <i>Homo sapiens</i>                      | 9.1   | 7.2   | 6.8   | 0.8 | 0.1 | 1.1 | 0.3 |
| 2357 | 137g10 | AV621899 | LC042d04  | ThioredoxinIII                                                     | <i>Branchiostoma belcheri</i>            | 37.5  | 33.1  | 38.3  | 0.9 | 0.2 | 0.9 | 0.3 |
| 2358 | 120e07 | AV636111 | HC055c07  | Threonine synthase                                                 | <i>Arabidopsis thaliana</i>              | 28.8  | 13.0  | 16.6  | 0.5 | 0.1 | 0.8 | 0.3 |
| 2359 | 030e07 | AV631718 | LCL098f07 | Threonine synthase                                                 | <i>Arabidopsis thaliana</i>              | 2.4   | 2.8   | 4.2   | 1.2 | 0.3 | 0.7 | 0.1 |
| 2360 | 017e12 | AV643382 | HCL068f05 | Threonine synthase                                                 | <i>Arabidopsis thaliana</i>              | 16.7  | 5.1   | 7.9   | 0.3 | 0.1 | 0.7 | 0.3 |
| 2361 | 153e06 | AV630519 | LCL080b05 | Threonyl-tRNA synthetase                                           | <i>Arabidopsis thaliana</i>              | 22.4  | 19.5  | 17.5  | 0.9 | 0.2 | 1.1 | 0.2 |
| 2362 | 138f08 | AV622466 | LC050b04  | Threonyl-tRNA synthetase                                           | <i>Arabidopsis thaliana</i>              | 33.7  | 29.7  | 29.7  | 0.9 | 0.3 | 1.0 | 0.1 |
| 2363 | 015e10 | AV641204 | HCL029g01 | Threonyl-tRNA synthetase                                           | <i>Arabidopsis thaliana</i>              | 10.5  | 9.5   | 10.9  | 0.9 | 0.3 | 0.9 | 0.5 |
| 2364 | 023d03 | AV625032 | LC086e01  | Thylakoid lumen rotamase                                           | <i>Spinacia oleracea</i>                 | 78.2  | 64.8  | 59.2  | 0.8 | 0.3 | 1.1 | 0.7 |
| 2365 | 107d05 | AV397696 | CM009e01  | Thymidylate kinase                                                 | <i>Arabidopsis thaliana</i>              | 6.5   | 6.7   | 5.5   | 1.1 | 0.3 | 1.2 | 0.2 |
| 2366 | 019c01 | AV619688 | LC011g07  | TLS-associated protein with SR repeats                             | <i>Mus musculus</i>                      | 9.6   | 8.3   | 8.4   | 0.9 | 0.2 | 1.6 | 1.1 |
| 2367 | 135f09 | AV620122 | LC017h05  | Toponlast intrinsic protein bobTIP26-2                             | <i>Brassica oleracea var. botrytis</i>   | 20.3  | 18.6  | 12.7  | 0.9 | 0.2 | 1.5 | 0.4 |
| 2368 | 125h11 | AV640862 | HCL023f12 | Topoisomerase-III                                                  | <i>Homo sapiens</i>                      | 7.6   | 6.7   | 11.4  | 0.9 | 0.1 | 0.8 | 0.5 |
| 2369 | 014b06 | AV639767 | HCL004f09 | Transaldolase B (talB)                                             | <i>Haemophilus influenzae Rd</i>         | 27.3  | 25.7  | 44.3  | 0.9 | 0.1 | 0.7 | 0.3 |
| 2370 | 148g10 | AV628195 | LCL038b06 | Transcription activator                                            | <i>Homo sapiens</i>                      | 15.1  | 19.2  | 16.1  | 1.3 | 0.2 | 1.2 | 0.1 |
| 2371 | 028e07 | AV630082 | LCL072f11 | Transcription activator                                            | <i>Homo sapiens</i>                      | 1.1   | 0.9   | 1.3   | 0.8 | 0.6 | 0.6 | 0.2 |
| 2372 | 019h06 | AV620416 | LC021h08  | Transcription factor BTF3a                                         | <i>Homo sapiens</i>                      | 87.0  | 64.4  | 60.8  | 0.7 | 0.2 | 1.0 | 0.2 |
| 2373 | 116f11 | AV398027 | CS001g10  | Transcriptional regulator                                          | <i>Arabidopsis thaliana</i>              | 13.6  | 13.1  | 19.6  | 1.0 | 0.2 | 0.7 | 0.1 |
| 2374 | 165e01 | BP095208 | MXL038a10 | Transitional endoplasmic reticulum ATPase                          | <i>Arabidopsis thaliana</i>              | 15.5  | 19.4  | 28.0  | 1.3 | 0.1 | 0.7 | 0.3 |
| 2375 | 132h03 | AV644851 | HCL094f08 | Transketolase                                                      | <i>Oryza sativa</i>                      | 140.6 | 180.6 | 93.4  | 1.2 | 0.5 | 2.0 | 1.3 |
| 2376 | 158f02 | BP087671 | MX041a08  | Transketolase                                                      | <i>Arabidopsis thaliana</i>              | 71.0  | 61.8  | 54.3  | 0.9 | 0.1 | 1.1 | 0.1 |
| 2377 | 001d08 | AV393839 | CL12f09   | Transketolase                                                      | <i>Thermosynechococcus elongatus BP-</i> | 76.8  | 69.7  | 67.1  | 0.9 | 0.2 | 1.0 | 0.2 |
| 2378 | 118e01 | BP383692 | HC025d10  | Transketolase, chloroplast                                         | <i>Arabidopsis thaliana</i>              | 33.2  | 39.0  | 32.4  | 1.2 | 0.2 | 1.2 | 0.3 |
| 2379 | 008g01 | AV389456 | CM075e01  | Translation initiation factor                                      | <i>Pisum sativum</i>                     | 18.5  | 21.0  | 26.8  | 1.2 | 0.2 | 0.8 | 0.2 |
| 2380 | 032a06 | BP087693 | MX041f06  | Translation initiation factor                                      | <i>Pisum sativum</i>                     | 49.0  | 38.1  | 52.9  | 0.8 | 0.1 | 0.7 | 0.0 |
| 2381 | 165c01 | BP095122 | MXL036c02 | Translation initiation factor 3-like protein                       | <i>Arabidopsis thaliana</i>              | 26.9  | 14.8  | 14.2  | 0.6 | 0.2 | 1.1 | 0.5 |
| 2382 | 005d08 | AV388224 | CM024a09  | Translation initiation factor 4A2                                  | <i>Zea mays</i>                          | 149.5 | 142.9 | 174.8 | 1.0 | 0.0 | 0.8 | 0.1 |
| 2383 | 117b04 | AV632253 | HC005h03  | Translation initiation factor IF-1, chloroplast                    | <i>Chlorella vulgaris</i>                | 8.2   | 6.1   | 5.9   | 0.8 | 0.2 | 1.1 | 0.1 |
| 2384 | 014b09 | AV639794 | HCL005b06 | Transmembrane protein                                              | <i>Mus musculus</i>                      | 5.7   | 4.7   | 5.6   | 0.8 | 0.1 | 0.8 | 0.2 |
| 2385 | 026f02 | BP383840 | LCL041h08 | Transport protein                                                  | <i>Arabidopsis thaliana</i>              | 13.1  | 11.6  | 13.3  | 0.9 | 0.1 | 0.9 | 0.3 |
| 2386 | 026g10 | AV628555 | LCL043f11 | Trehalose-associated protein kinase                                | <i>Schizosaccharomyces pombe</i>         | 2.3   | 1.8   | 3.3   | 0.8 | 0.2 | 0.6 | 0.2 |
| 2387 | 034d05 | BP095697 | MXL046a02 | Triosephosphate/3-phosphoglycerate/phosphate translocator          | <i>Zea mays</i>                          | 73.0  | 66.7  | 57.8  | 0.9 | 0.3 | 1.2 | 0.4 |
| 2388 | 024g01 | AV626766 | LCL015b03 | tRNA-processing protein SEN3-like                                  | <i>Arabidopsis thaliana</i>              | 3.2   | 2.7   | 2.4   | 0.8 | 0.2 | 1.1 | 0.6 |
| 2389 | 007d12 | AV391732 | CM055h02  | Tryptophan synthase alpha chain                                    | <i>Arabidopsis thaliana</i>              | 9.6   | 5.0   | 7.0   | 0.5 | 0.1 | 0.7 | 0.1 |
| 2390 | 152f05 | AV630041 | LCL071g12 | Tryptophan synthase beta                                           | <i>Chlamydomonas reinhardtii</i>         | 33.7  | 20.4  | 25.7  | 0.6 | 0.2 | 0.9 | 0.4 |
| 2391 | 159b10 | BP087747 | MX042g10  | Tubulin beta-1/beta-2 chain                                        | <i>Chlamydomonas reinhardtii</i>         | 183.3 | 351.6 | 143.0 | 1.9 | 0.3 | 3.3 | 2.2 |
| 2392 | 035g04 | AV625639 | LC095g11  | Tubulin beta-1/beta-2 chain                                        | <i>Chlamydomonas reinhardtii</i>         | 132.5 | 195.1 | 116.7 | 1.5 | 0.0 | 1.8 | 0.6 |
| 2393 | 115h11 | AV391942 | CM093f12  | Tubulin beta-2 chain                                               | <i>Polytomella agilis</i>                | 51.2  | 72.4  | 55.2  | 1.4 | 0.2 | 1.3 | 0.2 |
| 2394 | 156a12 | AV631712 | LCL098f01 | Tubulin Uni3                                                       | <i>Chlamydomonas reinhardtii</i>         | 7.9   | 8.7   | 5.9   | 1.3 | 0.4 | 2.5 | 1.6 |
| 2395 | 031g12 | BP087392 | MX033f01  | Type 2 peroxiredoxin                                               | <i>Brassica rapa subsp. pekinensis</i>   | 18.4  | 11.9  | 15.0  | 0.7 | 0.2 | 0.8 | 0.3 |
| 2396 | 034h07 | BP096417 | MXL058d03 | Type 2A protein serine/threonine phosphatase 55 kDa Bregulatory su | <i>Arabidopsis thaliana</i>              | 39.3  | 48.1  | 29.3  | 1.2 | 0.3 | 1.6 | 0.2 |
| 2397 | 008d02 | AV397400 | CM068h10  | Tyrosin 3-monooxygenase                                            | <i>Anguilla anguilla</i>                 | 3.9   | 4.6   | 4.3   | 1.3 | 0.4 | 1.1 | 0.4 |
| 2398 | 124b04 | AV639994 | HCL008d11 | Tyrosine-tRNA ligase                                               | <i>Escherichia coli</i>                  | 20.5  | 15.1  | 18.2  | 0.7 | 0.1 | 0.8 | 0.1 |
| 2399 | 122e04 | AV638453 | HC086f01  | U2 small nuclear ribonucleoprotein A'                              | <i>Arabidopsis thaliana</i>              | 15.1  | 14.7  | 13.9  | 1.0 | 0.2 | 1.1 | 0.3 |
| 2400 | 021f11 | AV622732 | LC053g01  | U2 snRNA                                                           | <i>Chlamydomonas reinhardtii</i>         | 16.2  | 20.9  | 18.3  | 1.2 | 0.7 | 1.2 | 0.9 |
| 2401 | 121g10 | AV637548 | HC074e03  | U2 snRNP auxiliary factor, large subunit                           | <i>Nicotiana glauca</i>                  | 13.4  | 10.3  | 13.4  | 0.8 | 0.1 | 0.8 | 0.3 |
| 2402 | 019c11 | AV619915 | LC013d08  | U2 snRNP auxiliary factor, small subunit                           | <i>Oryza sativa</i>                      | 5.5   | 4.7   | 4.6   | 0.9 | 0.3 | 1.1 | 0.4 |
| 2403 | 014a07 | AV639691 | HCL003b08 | U5 small nuclear ribonucleoprotein 116 kDa                         | <i>Arabidopsis thaliana</i>              | 10.8  | 10.4  | 9.1   | 1.0 | 0.1 | 1.1 | 0.1 |
| 2404 | 127b10 | AV641679 | HCL038e12 | U5 small nuclear ribonucleoprotein 116 kDa                         | <i>Arabidopsis thaliana</i>              | 14.7  | 12.8  | 11.8  | 0.9 | 0.2 | 1.1 | 0.3 |
| 2405 | 163c02 | BP094149 | MXL018g07 | U5 snRNP-specific protein                                          | <i>Saccharomyces cerevisiae</i>          | 8.1   | 11.4  | 8.8   | 1.8 | 1.2 | 1.8 | 1.2 |
| 2406 | 166g08 | BP095757 | MXL046h11 | U5snRNP-specific protein-like                                      | <i>Arabidopsis thaliana</i>              | 14.1  | 7.9   | 11.9  | 0.5 | 0.2 | 0.7 | 0.5 |
| 2407 | 119c05 | AV634811 | HC038c02  | U6 snRNA-associated Sm-like protein                                | <i>Arabidopsis thaliana</i>              | 148.9 | 150.8 | 124.3 | 1.0 | 0.1 | 1.3 | 0.6 |
| 2408 | 140h01 | AV624103 | LC073a03  | U88                                                                | <i>Human herpesvirus 6</i>               | 7.6   | 6.3   | 6.4   | 0.8 | 0.1 | 1.1 | 0.4 |
| 2409 | 033b03 | BP094068 | MXL017f11 | U88                                                                | <i>Human herpesvirus 6</i>               | 24.3  | 16.4  | 30.8  | 0.7 | 0.2 | 0.6 | 0.3 |
| 2410 | 147h01 | AV627708 | LCL030h06 | UBC13                                                              | <i>Arabidopsis thaliana</i>              | 9.6   | 10.3  | 11.2  | 1.1 | 0.2 | 1.0 | 0.4 |
| 2411 | 011e12 | AV635171 | HC042g11  | Ubiquinol-cytochrome c oxidoreductase                              | <i>Chlamydomonas reinhardtii</i>         | 29.6  | 21.8  | 27.3  | 0.7 | 0.0 | 0.8 | 0.0 |
| 2412 | 117e01 | AV632744 | HC012a09  | Ubiquinol-cytochrome c reductase complex core protein 2            | <i>Neurospora crassa</i>                 | 3.9   | 4.5   | 3.8   | 1.2 | 0.6 | 1.2 | 0.4 |
| 2413 | 031c11 | BP086770 | MX016d05  | Ubiquinol-cytochrome c reductase-like protein                      | <i>Arabidopsis thaliana</i>              | 52.0  | 38.6  | 40.8  | 0.7 | 0.1 | 1.0 | 0.3 |
| 2414 | 002c06 | AV395116 | CL36a06   | Ubiquitin                                                          | <i>Hordeum vulgare</i>                   | 134.6 | 151.4 | 101.0 | 1.2 | 0.2 | 1.5 | 0.5 |
| 2415 | 106e08 | AV386478 | CM001e03  | Ubiquitin / ribosomal protein CEP52                                | <i>Chlamydomonas reinhardtii</i>         | 92.5  | 100.3 | 104.2 | 1.0 | 0.5 | 0.9 | 0.5 |
| 2416 | 025e03 | AV627435 | LCL026f10 | Ubiquitin activating enzyme                                        | <i>Triticum aestivum</i>                 | 14.4  | 10.7  | 13.5  | 0.8 | 0.2 | 0.8 | 0.2 |
| 2417 | 125a11 | BP098714 | MXL097g09 | Ubiquitin activating enzyme 2                                      | <i>Arabidopsis thaliana</i>              | 14.4  | 13.8  | 16.5  | 1.0 | 0.1 | 0.9 | 0.2 |
| 2418 | 161a04 | BP089462 | MX207g07  | Ubiquitin carrier protein E2                                       | <i>Homo sapiens</i>                      | 13.3  | 14.1  | 7.9   | 1.1 | 0.3 | 2.3 | 1.4 |
| 2419 | 033e12 | BP094582 | MXL025c04 | Ubiquitin carrier protein                                          | <i>Triticum vulgare</i>                  | 12.8  | 17.6  | 15.4  | 1.5 | 0.8 | 1.2 | 0.6 |
| 2420 | 020e02 | AV621106 | LC031c10  | Ubiquitin conjugating enzyme                                       | <i>Zea mays</i>                          | 43.1  | 42.0  | 33.3  | 1.0 | 0.2 | 1.3 | 0.0 |
| 2421 | 105d09 | AV396530 | CL63d02   | Ubiquitin extension protein (UBQ5)                                 | <i>Arabidopsis thaliana</i>              | 101.1 | 103.4 | 75.6  | 1.1 | 0.2 | 1.5 | 0.4 |
| 2422 | 104e05 | AV395729 | CL50h02   | Ubiquitin specific protease 14                                     | <i>Oryza sativa</i>                      | 19.3  | 11.8  | 13.2  | 0.6 | 0.3 | 0.9 | 0.3 |
| 2423 | 120b01 | AV635717 | HC050a03  | Ubiquitin/ribosomal protein S27a fusion protein                    | <i>Lupinus albus</i>                     | 133.3 | 131.9 | 81.2  | 1.1 | 0.3 | 1.7 | 0.6 |
| 2424 | 020f03 | AV621239 | LC033c06  | Ubiquitin carrier protein                                          | <i>Medicago sativa</i>                   | 14.0  | 21.6  | 17.5  | 1.6 | 0.4 | 1.4 | 0.5 |
| 2425 | 021g10 | AV622930 | LC056f10  | Ubiquitin-conjugating enzyme                                       | <i>Arabidopsis thaliana</i>              | 8.1   | 10.3  | 8.6   | 1.2 | 0.3 | 1.2 | 0.7 |
| 2426 | 142c11 | AV625089 | LC087g02  | Ubiquitin-conjugating enzyme                                       | <i>Schizosaccharomyces pombe</i>         | 4.5   | 5.3   | 4.5   | 1.2 | 0.1 | 1.2 | 0.2 |
| 2427 | 031g05 | BP087315 | MX031h07  | Ubiquitin-conjugating enzyme E2-23 kD                              | <i>Zea mays</i>                          | 20.4  | 27.5  | 41.5  | 1.4 | 0.3 | 0.7 | 0.1 |
| 2428 | 008l02 | AV393093 | CM067c06  | Ubiquitin-conjugating enzyme protein E2                            | <i>Zea mays</i>                          | 7.1   | 6.3   | 6.3   | 0.9 | 0.2 | 1.0 | 0.1 |
| 2429 | 107c05 | AV386724 | CM008c09  | Ubiquitin-conjugating enzyme UBC1                                  | <i>Arabidopsis thaliana</i>              | 496.0 | 164.1 | 386.3 | 0.3 | 0.0 | 0.4 | 0.0 |
| 2430 | 141f04 | AV624621 | LC080c11  | Ubiquitin-like protein SMT3                                        | <i>Arabidopsis thaliana</i>              | 48.0  | 26.1  | 36.2  | 0.6 | 0.1 | 0.8 | 0.4 |
| 2431 | 141f05 | AV624613 | LC080b11  | Ubiquitin-specific protease                                        | <i>Arabidopsis thaliana</i>              | 21.3  | 15.4  | 17.4  | 0.7 | 0.2 | 1.0 | 0.4 |
| 2432 | 022a09 | AV623353 | LC062e06  | UDP-galactose 4-epimerase-like protein                             | <i>Arabidopsis thaliana</i>              | 19.6  | 13.0  | 12.4  | 0.7 | 0.1 | 1.1 | 0.2 |
| 2433 | 168c06 | BP096385 | MXL058a01 | UDP-glucose dehydro                                                |                                          |       |       |       |     |     |     |     |



|      | A      | B        | C         | D                                             | E                                    | F     | G     | H     | I   | J   | K   | L   |
|------|--------|----------|-----------|-----------------------------------------------|--------------------------------------|-------|-------|-------|-----|-----|-----|-----|
| 2459 | 159f12 | BP088005 | MX049c04  | unknown protein                               | <i>Arabidopsis thaliana</i>          | 14.0  | 11.7  | 14.0  | 0.8 | 0.1 | 0.8 | 0.1 |
| 2460 | 165a04 | BP095021 | MXL034e12 | Unknown protein                               | <i>Arabidopsis thaliana</i>          | 10.8  | 22.2  | 7.5   | 2.0 | 0.5 | 4.6 | 3.6 |
| 2461 | 110a05 | AV388768 | CM032b06  | Unknown protein                               | <i>Arabidopsis thaliana</i>          | 16.4  | 14.8  | 3.7   | 0.9 | 0.1 | 3.9 | 2.2 |
| 2462 | 022e08 | AV623987 | LC071f08  | Unknown protein                               | <i>Arabidopsis thaliana</i>          | 75.8  | 41.7  | 12.7  | 0.6 | 0.1 | 3.4 | 1.4 |
| 2463 | 157b12 | BP086698 | MX014f04  | Unknown protein                               | <i>Arabidopsis thaliana</i>          | 6.7   | 9.4   | 6.4   | 1.5 | 0.8 | 3.1 | 2.9 |
| 2464 | 157a12 | BP086579 | MX012a02  | Unknown protein                               | <i>Arabidopsis thaliana</i>          | 30.8  | 19.3  | 16.4  | 0.7 | 0.2 | 2.2 | 2.0 |
| 2465 | 002a01 | AV394721 | CL27d08   | Unknown protein                               | <i>Arabidopsis thaliana</i>          | 58.4  | 65.7  | 30.1  | 1.2 | 0.1 | 2.0 | 0.9 |
| 2466 | 026d01 | AV628289 | LCL039f04 | Unknown protein                               | <i>Arabidopsis thaliana</i>          | 5.7   | 4.9   | 4.3   | 0.9 | 0.2 | 1.8 | 1.5 |
| 2467 | 129h03 | AV643070 | HCL063c02 | Unknown protein                               | <i>Arabidopsis thaliana</i>          | 9.7   | 11.3  | 7.0   | 1.2 | 0.1 | 1.7 | 0.7 |
| 2468 | 023g03 | AV623550 | LC085e06  | Unknown protein                               | <i>Arabidopsis thaliana</i>          | 31.7  | 47.1  | 40.0  | 1.4 | 0.5 | 1.7 | 1.1 |
| 2469 | 136e12 | AV620774 | LC026f07  | Unknown protein                               | <i>Arabidopsis thaliana</i>          | 7.8   | 13.3  | 8.3   | 1.7 | 0.5 | 1.6 | 0.5 |
| 2470 | 017g01 | AV643596 | HCL072d10 | Unknown protein                               | <i>Arabidopsis thaliana</i>          | 2.8   | 4.2   | 2.9   | 2.0 | 1.0 | 1.5 | 0.7 |
| 2471 | 033b12 | BP094176 | MXL019b05 | Unknown protein                               | <i>Arabidopsis thaliana</i>          | 41.7  | 46.7  | 39.9  | 1.1 | 0.1 | 1.5 | 1.1 |
| 2472 | 036h12 | BP098889 | MXL100h05 | Unknown protein                               | <i>Arabidopsis thaliana</i>          | 20.1  | 37.1  | 24.8  | 1.9 | 0.7 | 1.5 | 0.4 |
| 2473 | 120h06 | AV636504 | HC066d06  | Unknown protein                               | <i>Arabidopsis thaliana</i>          | 28.9  | 28.0  | 19.8  | 1.0 | 0.1 | 1.5 | 0.5 |
| 2474 | 172c05 | BP098293 | MXL091a06 | Unknown protein                               | <i>Arabidopsis thaliana</i>          | 3.1   | 5.4   | 3.8   | 1.7 | 0.3 | 1.5 | 0.3 |
| 2475 | 012a05 | AV635825 | HC051d11  | Unknown protein                               | <i>Arabidopsis thaliana</i>          | 20.6  | 11.4  | 8.0   | 0.6 | 0.3 | 1.4 | 0.5 |
| 2476 | 108a12 | AV387449 | CM016d09  | Unknown protein                               | <i>Arabidopsis thaliana</i>          | 15.2  | 29.8  | 22.5  | 2.0 | 0.1 | 1.4 | 0.6 |
| 2477 | 034f12 | BP096170 | MXL054a03 | Unknown protein                               | <i>Arabidopsis thaliana</i>          | 13.2  | 13.7  | 10.3  | 1.1 | 0.2 | 1.4 | 0.5 |
| 2478 | 158c09 | BP087610 | MX039a02  | Unknown protein                               | <i>Arabidopsis thaliana</i>          | 9.9   | 12.5  | 9.6   | 1.3 | 0.2 | 1.4 | 0.4 |
| 2479 | 014e03 | AV397613 | CL02h04   | Unknown protein                               | <i>Arabidopsis thaliana</i>          | 21.9  | 22.9  | 17.3  | 1.0 | 0.1 | 1.4 | 0.3 |
| 2480 | 114b01 | AV389043 | CM073f11  | Unknown protein                               | <i>Arabidopsis thaliana</i>          | 11.2  | 16.4  | 12.0  | 1.5 | 0.5 | 1.4 | 0.2 |
| 2481 | 035d08 | BP097016 | MXL068g03 | Unknown protein                               | <i>Arabidopsis thaliana</i>          | 231.4 | 179.7 | 164.3 | 0.8 | 0.1 | 1.3 | 0.8 |
| 2482 | 010b02 | AV632213 | HC005d03  | Unknown protein                               | <i>Arabidopsis thaliana</i>          | 13.1  | 35.0  | 26.8  | 2.8 | 0.6 | 1.3 | 0.1 |
| 2483 | 102d05 | AV394272 | CL22a10   | Unknown protein                               | <i>Arabidopsis thaliana</i>          | 116.2 | 128.6 | 98.8  | 1.3 | 0.5 | 1.3 | 0.1 |
| 2484 | 162c03 | BP093584 | MXL010e07 | Unknown protein                               | <i>Arabidopsis thaliana</i>          | 11.5  | 10.9  | 12.5  | 1.1 | 0.8 | 1.3 | 1.0 |
| 2485 | 018e06 | AV618901 | LC001b01  | Unknown protein                               | <i>Arabidopsis thaliana</i>          | 7.1   | 13.4  | 10.7  | 1.9 | 0.3 | 1.3 | 0.3 |
| 2486 | 019b01 | AV619548 | LC009h01  | Unknown protein                               | <i>Arabidopsis thaliana</i>          | 7.0   | 6.7   | 5.9   | 1.1 | 0.4 | 1.2 | 0.4 |
| 2487 | 108c01 | AV388161 | CM017d03  | Unknown protein                               | <i>Arabidopsis thaliana</i>          | 7.6   | 11.9  | 10.2  | 1.6 | 0.3 | 1.2 | 0.2 |
| 2488 | 153h10 | AV630721 | LCL083c06 | Unknown protein                               | <i>Arabidopsis thaliana</i>          | 24.0  | 32.8  | 27.6  | 1.4 | 0.3 | 1.2 | 0.2 |
| 2489 | 025d08 | AV627329 | LCL025b02 | Unknown protein                               | <i>Arabidopsis thaliana</i>          | 13.4  | 15.7  | 13.1  | 1.2 | 0.3 | 1.2 | 0.2 |
| 2490 | 107f10 | AV386935 | CM011g04  | Unknown protein                               | <i>Arabidopsis thaliana</i>          | 63.0  | 56.6  | 55.3  | 0.9 | 0.2 | 1.2 | 0.4 |
| 2491 | 115f03 | AV391194 | CM089f09  | Unknown protein                               | <i>Arabidopsis thaliana</i>          | 9.1   | 8.3   | 7.2   | 0.9 | 0.2 | 1.2 | 0.2 |
| 2492 | 028b06 | AV629663 | LCL063a07 | Unknown protein                               | <i>Arabidopsis thaliana</i>          | 35.2  | 25.5  | 25.6  | 0.7 | 0.1 | 1.1 | 0.6 |
| 2493 | 008g05 | AV389466 | CM075h12  | Unknown protein                               | <i>Arabidopsis thaliana</i>          | 34.6  | 26.6  | 23.5  | 0.8 | 0.1 | 1.1 | 0.2 |
| 2494 | 009b09 | AV390752 | CM085a11  | Unknown protein                               | <i>Arabidopsis thaliana</i>          | 5.8   | 4.9   | 4.5   | 0.9 | 0.2 | 1.1 | 0.3 |
| 2495 | 161e05 | BP093194 | MXL004h01 | Unknown protein                               | <i>Arabidopsis thaliana</i>          | 13.9  | 13.8  | 12.7  | 1.0 | 0.2 | 1.1 | 0.5 |
| 2496 | 030g09 | BP086182 | MX003e01  | Unknown protein                               | <i>Arabidopsis thaliana</i>          | 25.9  | 20.2  | 18.9  | 0.8 | 0.3 | 1.1 | 0.5 |
| 2497 | 023g08 | AV626086 | LCL002b11 | Unknown protein                               | <i>Arabidopsis thaliana</i>          | 8.3   | 9.4   | 8.6   | 1.1 | 0.3 | 1.1 | 0.3 |
| 2498 | 030b05 | AV631424 | LCL093f12 | Unknown protein                               | <i>Arabidopsis thaliana</i>          | 16.1  | 14.9  | 13.8  | 0.9 | 0.2 | 1.1 | 0.2 |
| 2499 | 106f07 | AV397832 | CM002e03  | Unknown protein                               | <i>Arabidopsis thaliana</i>          | 41.2  | 44.7  | 41.8  | 1.1 | 0.2 | 1.1 | 0.2 |
| 2500 | 143f04 | AV625828 | LC098d09  | Unknown protein                               | <i>Arabidopsis thaliana</i>          | 12.0  | 11.9  | 11.2  | 1.0 | 0.1 | 1.1 | 0.0 |
| 2501 | 140f01 | AV623933 | LC070f06  | Unknown protein                               | <i>Arabidopsis thaliana</i>          | 5.6   | 6.0   | 6.8   | 1.2 | 0.5 | 1.1 | 0.6 |
| 2502 | 116h09 | AV632019 | HC002h09  | Unknown protein                               | <i>Arabidopsis thaliana</i>          | 12.3  | 10.6  | 10.2  | 0.9 | 0.3 | 1.1 | 0.2 |
| 2503 | 018f05 | AV619025 | LC002g05  | Unknown protein                               | <i>Arabidopsis thaliana</i>          | 6.3   | 8.5   | 8.2   | 1.3 | 0.2 | 1.1 | 0.3 |
| 2504 | 019e02 | AV619958 | LC015e10  | Unknown protein                               | <i>Volvox carteri f. nagariensis</i> | 16.7  | 40.3  | 39.3  | 2.5 | 0.6 | 1.0 | 0.1 |
| 2505 | 144d11 | AV626255 | LCL005c04 | Unknown protein                               | <i>Arabidopsis thaliana</i>          | 6.4   | 8.0   | 7.8   | 1.2 | 0.2 | 1.0 | 0.2 |
| 2506 | 008b07 | AV392967 | CM066d02  | Unknown protein                               | <i>Arabidopsis thaliana</i>          | 8.3   | 11.9  | 11.7  | 1.5 | 0.7 | 1.0 | 0.2 |
| 2507 | 012b10 | AV636277 | HC057d03  | Unknown protein                               | <i>Arabidopsis thaliana</i>          | 15.4  | 10.0  | 10.2  | 0.7 | 0.3 | 1.0 | 0.4 |
| 2508 | 142f01 | AV625264 | LC090b06  | Unknown protein                               | <i>Arabidopsis thaliana</i>          | 7.0   | 5.7   | 5.9   | 0.8 | 0.1 | 1.0 | 0.2 |
| 2509 | 023c08 | AV624930 | LC084f11  | Unknown protein                               | <i>Arabidopsis thaliana</i>          | 49.5  | 36.8  | 42.5  | 0.7 | 0.1 | 1.0 | 0.4 |
| 2510 | 023h08 | AV626221 | LCL004e10 | Unknown protein                               | <i>Arabidopsis thaliana</i>          | 41.3  | 36.8  | 39.6  | 0.9 | 0.1 | 0.9 | 0.2 |
| 2511 | 165f04 | BP095278 | MXL039c07 | Unknown protein                               | <i>Arabidopsis thaliana</i>          | 10.1  | 10.3  | 11.0  | 1.0 | 0.4 | 0.9 | 0.5 |
| 2512 | 137f07 | AV621772 | LC040g04  | Unknown protein                               | <i>Arabidopsis thaliana</i>          | 10.7  | 11.6  | 13.0  | 1.1 | 0.3 | 0.9 | 0.3 |
| 2513 | 109c09 | AV388115 | CM025d01  | Unknown protein                               | <i>Arabidopsis thaliana</i>          | 18.6  | 17.8  | 21.3  | 1.0 | 0.1 | 0.9 | 0.3 |
| 2514 | 020e04 | AV621114 | LC031d10  | Unknown protein                               | <i>Arabidopsis thaliana</i>          | 9.9   | 6.8   | 7.6   | 0.7 | 0.2 | 0.9 | 0.2 |
| 2515 | 021c09 | AV622182 | LC046c03  | Unknown protein                               | <i>Arabidopsis thaliana</i>          | 33.6  | 30.0  | 35.4  | 0.9 | 0.1 | 0.9 | 0.4 |
| 2516 | 023f06 | AV625306 | LC090f11  | Unknown protein                               | <i>Arabidopsis thaliana</i>          | 10.0  | 19.4  | 23.3  | 1.9 | 0.1 | 0.9 | 0.4 |
| 2517 | 126b06 | AV641053 | HCL026h10 | Unknown protein                               | <i>Arabidopsis thaliana</i>          | 11.7  | 11.8  | 13.3  | 1.0 | 0.1 | 0.9 | 0.1 |
| 2518 | 109f10 | AV388325 | CM028e11  | Unknown protein                               | <i>Arabidopsis thaliana</i>          | 4.6   | 5.2   | 5.9   | 1.1 | 0.1 | 0.9 | 0.1 |
| 2519 | 157c06 | BP086763 | MX016c02  | Unknown protein                               | <i>Arabidopsis thaliana</i>          | 5.4   | 5.9   | 7.0   | 1.1 | 0.4 | 0.9 | 0.3 |
| 2520 | 033c05 | BP094219 | MXL019g02 | Unknown protein                               | <i>Arabidopsis thaliana</i>          | 59.1  | 43.1  | 57.5  | 0.7 | 0.1 | 0.8 | 0.5 |
| 2521 | 008a06 | AV392749 | CM063d05  | Unknown protein                               | <i>Arabidopsis thaliana</i>          | 13.0  | 10.7  | 12.9  | 0.8 | 0.1 | 0.8 | 0.1 |
| 2522 | 034a05 | BP095160 | MXL036h02 | Unknown protein                               | <i>Arabidopsis thaliana</i>          | 25.1  | 19.8  | 26.5  | 0.9 | 0.3 | 0.8 | 0.3 |
| 2523 | 013f02 | AV639046 | HC094c11  | Unknown protein                               | <i>Arabidopsis thaliana</i>          | 23.4  | 34.6  | 43.3  | 1.5 | 0.1 | 0.8 | 0.1 |
| 2524 | 147d11 | AV627545 | LCL028c09 | Unknown protein                               | <i>Arabidopsis thaliana</i>          | 14.7  | 12.6  | 15.8  | 0.9 | 0.3 | 0.8 | 0.1 |
| 2525 | 016c10 | AV641983 | HCL043d11 | Unknown protein                               | <i>Arabidopsis thaliana</i>          | 1.6   | 1.3   | 1.7   | 0.8 | 0.3 | 0.8 | 0.4 |
| 2526 | 148f05 | AV628118 | LCL037a03 | Unknown protein                               | <i>Arabidopsis thaliana</i>          | 9.2   | 8.5   | 10.8  | 0.9 | 0.2 | 0.8 | 0.2 |
| 2527 | 112h12 | AV392591 | CM062f10  | Unknown protein                               | <i>Arabidopsis thaliana</i>          | 7.6   | 7.3   | 10.7  | 1.0 | 0.1 | 0.8 | 0.3 |
| 2528 | 017f11 | AV643594 | HCL072d08 | Unknown protein                               | <i>Bacillus subtilis</i>             | 33.9  | 15.9  | 20.9  | 0.5 | 0.1 | 0.8 | 0.1 |
| 2529 | 150c10 | AV628940 | LCL049c06 | Unknown protein                               | <i>Arabidopsis thaliana</i>          | 42.4  | 29.3  | 39.9  | 0.8 | 0.2 | 0.7 | 0.1 |
| 2530 | 013b03 | AV638032 | HC081a01  | Unknown protein                               | <i>Arabidopsis thaliana</i>          | 8.0   | 5.6   | 7.7   | 0.7 | 0.1 | 0.7 | 0.1 |
| 2531 | 158h08 | BP087712 | MX042a06  | Unknown protein                               | <i>Arabidopsis thaliana</i>          | 8.0   | 6.9   | 10.1  | 0.8 | 0.5 | 0.7 | 0.5 |
| 2532 | 172c01 | BP098285 | MXL090h01 | Unknown protein                               | <i>Oryza sativa</i>                  | 44.3  | 22.9  | 31.6  | 0.5 | 0.1 | 0.7 | 0.5 |
| 2533 | 172d12 | BP098377 | MXL092d11 | Unknown protein                               | <i>Arabidopsis thaliana</i>          | 17.7  | 12.2  | 18.2  | 0.7 | 0.1 | 0.7 | 0.1 |
| 2534 | 127b05 | AV641657 | HCL038c04 | Unknown protein                               | <i>Arabidopsis thaliana</i>          | 23.4  | 20.0  | 30.8  | 0.9 | 0.0 | 0.7 | 0.2 |
| 2535 | 024g09 | AV626858 | LCL016g09 | Unknown protein                               | <i>Arabidopsis thaliana</i>          | 28.1  | 19.8  | 32.3  | 0.7 | 0.2 | 0.6 | 0.1 |
| 2536 | 018h06 | AV619199 | LC005a09  | Unknown protein                               | <i>Arabidopsis thaliana</i>          | 3.7   | 7.1   | 11.6  | 2.0 | 0.4 | 0.6 | 0.1 |
| 2537 | 023d10 | AV625100 | LC087h05  | Unknown protein                               | <i>Arabidopsis thaliana</i>          | 11.0  | 9.1   | 15.3  | 0.8 | 0.2 | 0.6 | 0.1 |
| 2538 | 149h06 | AV628717 | LCL046b04 | Unknown protein                               | <i>Arabidopsis thaliana</i>          | 24.6  | 17.2  | 38.7  | 0.8 | 0.2 | 0.6 | 0.3 |
| 2539 | 109b01 | AV387751 | CM023g02  | Unknown Protein                               | <i>Arabidopsis thaliana</i>          | 385.3 | 243.1 | 537.1 | 0.7 | 0.4 | 0.5 | 0.2 |
| 2540 | 162g12 | BP093953 | MXL016b10 | Unknown protein                               | <i>Arabidopsis thaliana</i>          | 741.3 | 316.2 | 746.2 | 0.4 | 0.2 | 0.5 | 0.3 |
| 2541 | 164b10 | BP094661 | MXL026f06 | Unknown protein containing DUF58 domain       | <i>Arabidopsis thaliana</i>          | 5.2   | 40.6  | 37.0  | 7.7 | 1.2 | 1.1 | 0.1 |
| 2542 | 023a12 | AV624626 | LC080g06  | Unknown protein, 3' partial                   | <i>Arabidopsis thaliana</i>          | 15.4  | 12.0  | 12.9  | 0.8 | 0.2 | 0.9 | 0.1 |
| 2543 | 168b11 | BP096364 | MXL057e09 | Unknown protein, 5' partial                   | <i>Arabidopsis thaliana</i>          | 14.7  | 23.7  | 16.2  | 1.6 | 0.2 | 1.8 | 0.8 |
| 2544 | 017f01 | AV643409 | HCL069c01 | Unnamed protein product                       | <i>Homo sapiens</i>                  | 7.7   | 11.4  | 8.1   | 1.8 | 0.7 | 1.4 | 0.1 |
| 2545 | 120h10 | AV636536 | HC060g05  | Unnamed protein product                       | <i>Homo sapiens</i>                  | 12.4  | 19.2  | 14.3  | 1.6 | 0.3 | 1.4 | 0.3 |
| 2546 | 034f01 | BP095999 | MXL050g09 | Unnamed protein product                       | <i>Homo sapiens</i>                  | 7.6   | 6.3   | 4.9   | 0.8 | 0.2 | 1.3 | 0.2 |
| 2547 | 003b08 | AV396026 | CL55h04   | Unnamed protein product                       | <i>Homo sapiens</i>                  | 6.0   | 8.6   | 7.2   | 1.4 | 0.2 | 1.2 | 0.1 |
| 2548 | 130c06 | AV643338 | HCL067h02 | Unnamed protein product                       | <i>Homo sapiens</i>                  | 19.4  | 19.0  | 18.4  | 1.0 | 0.1 | 1.1 | 0.2 |
| 2549 | 172f03 | BP098451 | MXL093e10 | Unnamed protein product                       | <i>Homo sapiens</i>                  | 20.3  | 23.0  | 23.0  | 1.1 | 0.1 | 1.0 | 0.2 |
| 2550 | 111f12 | BP098647 | MXL096h07 | Unnamed protein product                       | <i>Homo sapiens</i>                  | 13.8  | 14.8  | 15.5  | 1.1 | 0.3 | 1.0 | 0.1 |
| 2551 | 161h09 | BP093383 | MXL007f10 | Unnamed protein product                       | <i>Homo sapiens</i>                  | 14.0  | 14.5  | 20.4  | 0.9 | 0.4 | 0.7 | 0.5 |
| 2552 | 031b08 | BP086582 | MX012b02  | Uracil phosphoribosyltransferase-like protein | <i>Arabidopsis thaliana</i>          | 9.4   | 8.9   | 8.2   | 1.0 | 0.2 | 1.1 | 0.1 |
| 2553 | 159g09 | BP088102 | MX051f05  |                                               |                                      |       |       |       |     |     |     |     |

|      | A      | B        | C         | D                                                | E                                 | F     | G     | H     | I     | J     | K     | L     |
|------|--------|----------|-----------|--------------------------------------------------|-----------------------------------|-------|-------|-------|-------|-------|-------|-------|
| 2566 | 019a06 | AV619421 | LC008b04  | Vacuolar ATPase subunit DVA41                    | <i>Dictyosteliumdiscoideum</i>    | 16.3  | 16.9  | 13.8  | 1.1   | 0.1   | 1.6   | 1.1   |
| 2567 | 030h05 | BP086221 | MX004d09  | Vacuolar H+-ATPase subunit E                     | <i>Gossypiumhirsutum</i>          | 51.7  | 42.9  | 48.6  | 0.8   | 0.0   | 0.9   | 0.3   |
| 2568 | 026f04 | AV628459 | LCL042c01 | Vacuolar H+-pyrophosphatase                      | <i>Oryza sativa</i>               | 54.9  | 54.2  | 55.1  | 1.0   | 0.1   | 1.0   | 0.3   |
| 2569 | 030b02 | AV631387 | LCL093a09 | Vacuolar processing enzyme                       | <i>Arabidopsis thaliana</i>       | 2.1   | 1.3   | 1.2   | 0.6   | 0.2   | 2.4   | 3.1   |
| 2570 | 024d07 | AV626532 | LCL010g01 | Vacuolar protein sorting homolog                 | <i>Mus musculus</i>               | 14.8  | 13.6  | 15.6  | 0.9   | 0.1   | 0.9   | 0.2   |
| 2571 | 161a01 | BP089446 | MX207e03  | VacuolarH(+)-ATPasesubunit-like protein          | <i>Arabidopsis thaliana</i>       | 16.1  | 25.6  | 21.2  | 1.8   | 0.7   | 1.5   | 0.9   |
| 2572 | 026f10 | AV628503 | LCL042h06 | Valosin-containing protein                       | <i>Glycine max</i>                | 11.2  | 10.6  | 14.4  | 1.0   | 0.2   | 0.8   | 0.2   |
| 2573 | 118a03 | AV633305 | HC019c02  | Vallyl-tRNA synthetase                           | <i>Thermotoga maritima</i>        | 8.3   | 8.2   | 10.1  | 1.1   | 0.4   | 0.8   | 0.3   |
| 2574 | 018c09 | AV644416 | HCL088b04 | Vallyl-tRNA synthetase                           | <i>Thermotoga maritima</i>        | 9.0   | 7.0   | 9.6   | 0.8   | 0.1   | 0.7   | 0.1   |
| 2575 | 172a03 | BP098170 | MXL088f05 | Vartul-2 protein                                 | <i>Drosophila melanogaster</i>    | 278.7 | 262.1 | 228.1 | 1.0   | 0.5   | 1.9   | 1.7   |
| 2576 | 106a04 | AV396978 | CL73f04   | Very-long-chain fatty acid condensingenzyme CUT1 | <i>Arabidopsis thaliana</i>       | 8.8   | 10.1  | 11.7  | 1.1   | 0.1   | 1.0   | 0.6   |
| 2577 | 031e04 | BP086924 | MX020d09  | Vesicle trafficking protein-like protein         | <i>Arabidopsis thaliana</i>       | 8.7   | 7.5   | 5.3   | 0.9   | 0.1   | 1.4   | 0.4   |
| 2578 | 033c10 | BP094296 | MXL020g04 | Vesicle-associated membrane protein-like         | <i>Arabidopsis thaliana</i>       | 15.5  | 12.3  | 15.9  | 0.8   | 0.2   | 0.8   | 0.2   |
| 2579 | 118f01 | AV633952 | HC027d01  | v-fos transformation effector protein            | <i>Rattus norvegicus</i>          | 91.1  | 119.9 | 111.1 | 1.4   | 0.3   | 1.1   | 0.2   |
| 2580 | 150h01 | AV629184 | LCL053g11 | Virulence sensor protein BVGS                    | <i>Bordetella parapertussis</i>   | 3.9   | 3.1   | 3.2   | 0.8   | 0.1   | 1.0   | 0.3   |
| 2581 | 022a05 | AV390172 | CM086c03  | Voltage-dependent anion channel protein 2        | <i>Zea mays</i>                   | 32.0  | 65.8  | 47.2  | 2.1   | 0.6   | 1.4   | 0.1   |
| 2582 | 010f11 | AV633406 | HC020d12  | Voltage-dependent anion channel protein 2        | <i>Zea mays</i>                   | 26.2  | 48.8  | 45.6  | 1.9   | 0.4   | 1.1   | 0.2   |
| 2583 | 009c01 | AV390175 | CM086c03  | Voltage-dependent anion channel protein 2        | <i>Zea mays</i>                   | 50.6  | 44.5  | 43.5  | 0.9   | 0.1   | 1.0   | 0.3   |
| 2584 | 106h08 | AV386666 | CM004c08  | Volvoxopsin                                      | <i>Volvox carteri</i>             | 23.2  | 34.4  | 33.4  | 1.5   | 0.0   | 1.0   | 0.1   |
| 2585 | 109g10 | AV388473 | CM029b10  | WD repeat-containing protein 10; WDR10p          | <i>Homo sapiens</i>               | 69.5  | 63.5  | 36.2  | 0.9   | 0.2   | 1.8   | 0.1   |
| 2586 | 143g04 | BP383832 | LC100a01  | Wilm's tumor suppressor homolog                  | <i>Pinus taeda</i>                | 141.9 | 140.3 | 112.2 | 1.0   | 0.1   | 1.4   | 0.7   |
| 2587 | 167a10 | BP095876 | MXL048f06 | Xanthine dehydrogenase homolog                   | <i>Arabidopsis thaliana</i>       | 5.9   | 7.1   | 5.3   | 1.5   | 1.0   | 2.1   | 1.5   |
| 2588 | 036h09 | BP098875 | MXL100f03 | xl-Mago                                          | <i>Xenopus laevis</i>             | 14.5  | 14.8  | 14.4  | 1.0   | 0.1   | 1.0   | 0.2   |
| 2589 | 147e06 | AV627574 | LCL028g10 | YagE family                                      | <i>Chlamydia pneumoniae</i>       | 47.2  | 33.4  | 42.8  | 0.7   | 0.1   | 0.8   | 0.3   |
| 2590 | 002e02 | AV395445 | CL41h06   | Yer036cp                                         | <i>Saccharomyces cerevisiae</i>   | 11.4  | 6.7   | 7.3   | 0.6   | 0.1   | 1.0   | 0.4   |
| 2591 | 102b10 | AV394173 | CL19g05   | Yhr074wp                                         | <i>Saccharomyces cerevisiae</i>   | 17.8  | 15.0  | 35.1  | 0.8   | 0.2   | 0.6   | 0.4   |
| 2592 | 143h09 | AV626043 | LCL001e11 | Yk13g5.3                                         | <i>Caenorhabditis elegans</i>     | 25.6  | 22.5  | 27.5  | 0.9   | 0.1   | 0.8   | 0.1   |
| 2593 | 019e03 | AV619963 | LC015f03  | Ylr388wp                                         | <i>Saccharomyces cerevisiae</i>   | 91.5  | 104.9 | 67.9  | 1.1   | 0.1   | 1.6   | 0.5   |
| 2594 | 011c04 | AV634533 | HC034f06  | YptC1                                            | <i>Chlamydomonas reinhardtii</i>  | 19.1  | 23.1  | 24.1  | 1.2   | 0.1   | 1.0   | 0.1   |
| 2595 | 019d09 | AV619768 | LC014f01  | YptC4                                            | <i>Chlamydomonas reinhardtii</i>  | 89.0  | 81.9  | 64.6  | 0.9   | 0.1   | 1.6   | 1.0   |
| 2596 | 008d06 | AV387616 | CM069d04  | YptC5                                            | <i>Chlamydomonas reinhardtii</i>  | 17.8  | 19.5  | 21.5  | 1.1   | 0.3   | 1.0   | 0.4   |
| 2597 | 022f02 | AV624022 | LC071h05  | YptC6                                            | <i>Chlamydomonas reinhardtii</i>  | 21.6  | 32.4  | 25.7  | 1.5   | 0.1   | 1.2   | 0.1   |
| 2598 | 035e08 | BP097114 | MXL070d03 | Zeaxanthin epoxidase                             | <i>Nicotiana tabacum</i>          | 14.5  | 14.6  | 24.8  | 1.0   | 0.2   | 0.6   | 0.4   |
| 2599 | 027d06 | AV629169 | LCL053f03 | Zeta-carotene desaturase                         | <i>Naricissus pseudonarcissus</i> | 28.1  | 16.4  | 22.3  | 0.6   | 0.0   | 0.8   | 0.2   |
| 2600 | 011c12 | AV634678 | HC036d04  | Zinc-finger protein Lsd1                         | <i>Arabidopsis thaliana</i>       | 11.2  | 12.5  | 13.2  | 1.1   | 0.2   | 1.0   | 0.2   |
| 2601 | 014e11 | AV629697 | LCL064a01 | Zygotte-specific protein, pZS102-2               | <i>Chlamydomonas reinhardtii</i>  | 170.4 | 103.8 | 113.4 | 0.6   | 0.1   | 0.9   | 0.2   |
| 2602 | 029e07 | AV630918 | LCL086c11 | Zygotte-specific protein, pZS102-69              | <i>Chlamydomonas reinhardtii</i>  | 19.4  | 18.8  | 11.5  | 1.0   | 0.2   | 1.6   | 0.1   |
| 2603 | 106h02 | AV386583 | CM003h06  |                                                  |                                   | 4.1   | 4.6   | 3.7   | 1.1   | 0.2   | 1.4   | 0.4   |
| 2604 | 034h01 | BP096329 | MXL05eh02 |                                                  |                                   | 0.2   | 0.3   | 0.5   | 207.3 | 412.1 | 107.6 | 213.3 |
| 2605 | 168a04 | BP096278 | MXL05sh05 |                                                  |                                   | 26.0  | 42.8  | 7.3   | 1.5   | 0.7   | 12.1  | 12.3  |
| 2606 | 033d01 | BP094331 | MXL021d04 |                                                  |                                   | 40.2  | 28.2  | 2.8   | 0.7   | 0.1   | 10.5  | 1.5   |
| 2607 | 024a09 | AV626310 | LCL006f07 |                                                  |                                   | 2.3   | 1.3   | 1.0   | 0.6   | 0.2   | 9.1   | 16.1  |
| 2608 | 157b11 | BP086692 | MX014e02  |                                                  |                                   | 29.3  | 37.6  | 6.4   | 1.3   | 0.2   | 8.5   | 6.6   |
| 2609 | 021e03 | AV622398 | LC049b07  |                                                  |                                   | 36.5  | 66.6  | 7.8   | 1.8   | 0.4   | 8.4   | 3.0   |
| 2610 | 171b02 | BP097733 | MXL080d11 |                                                  |                                   | 4.8   | 30.9  | 6.2   | 6.4   | 0.2   | 7.1   | 4.0   |
| 2611 | 171a09 | BP097712 | MXL080b03 |                                                  |                                   | 16.0  | 21.9  | 10.3  | 1.4   | 0.7   | 6.9   | 7.4   |
| 2612 | 101c05 | AV393402 | CL03h02   |                                                  |                                   | 17.2  | 35.2  | 5.4   | 1.9   | 1.1   | 6.8   | 4.9   |
| 2613 | 018g10 | AV619108 | LC003h05  |                                                  |                                   | 10.9  | 39.4  | 8.8   | 3.8   | 4.0   | 6.8   | 7.5   |
| 2614 | 023a02 | AV624504 | LC078f04  |                                                  |                                   | 70.3  | 67.0  | 11.2  | 1.5   | 1.3   | 6.7   | 4.2   |
| 2615 | 136e04 | AV620728 | LC026a11  |                                                  |                                   | 8.8   | 53.1  | 9.8   | 5.6   | 4.9   | 6.6   | 8.4   |
| 2616 | 154b08 | AV630834 | LCL084h11 |                                                  |                                   | 4.7   | 23.3  | 5.3   | 5.7   | 5.6   | 6.5   | 6.8   |
| 2617 | 164a04 | BP094602 | MXL025e06 |                                                  |                                   | 6.5   | 12.9  | 3.4   | 2.5   | 2.2   | 6.4   | 6.3   |
| 2618 | 134c06 | AV619125 | LC004b05  |                                                  |                                   | 9.0   | 33.4  | 7.2   | 3.3   | 3.0   | 5.9   | 7.5   |
| 2619 | 169a08 | BP096805 | MXL065b08 |                                                  |                                   | 4.7   | 10.5  | 2.5   | 2.3   | 0.3   | 5.9   | 3.5   |
| 2620 | 155a11 | AV631284 | LCL091d09 |                                                  |                                   | 16.4  | 22.6  | 11.4  | 1.8   | 1.2   | 5.9   | 5.8   |
| 2621 | 011a07 | AV634051 | HC028h03  |                                                  |                                   | 45.0  | 27.0  | 4.9   | 0.8   | 0.3   | 5.8   | 3.1   |
| 2622 | 163a09 | BP094050 | MXL017d12 |                                                  |                                   | 21.8  | 20.8  | 14.7  | 1.0   | 0.4   | 5.7   | 6.2   |
| 2623 | 156g12 | BP086360 | MX007c05  |                                                  |                                   | 21.1  | 50.7  | 8.9   | 2.5   | 2.1   | 5.7   | 4.7   |
| 2624 | 164a10 | BP094627 | MXL025h10 |                                                  |                                   | 9.4   | 9.3   | 5.0   | 1.0   | 0.2   | 5.6   | 5.9   |
| 2625 | 110c10 | AV389138 | CM035c06  |                                                  |                                   | 10.2  | 167.3 | 35.4  | 17.9  | 11.6  | 5.4   | 3.8   |
| 2626 | 164b02 | BP094634 | MXL026a11 |                                                  |                                   | 20.1  | 31.6  | 13.2  | 1.6   | 0.4   | 5.4   | 4.6   |
| 2627 | 004a07 | AV397820 | CM002a08  |                                                  |                                   | 3.7   | 6.1   | 1.2   | 1.5   | 1.1   | 5.2   | 3.5   |
| 2628 | 155a08 | AV631276 | LCL091c06 |                                                  |                                   | 7.2   | 11.6  | 3.7   | 2.1   | 1.3   | 5.2   | 3.9   |
| 2629 | 022d07 | AV623782 | LC068e09  |                                                  |                                   | 10.5  | 44.4  | 8.5   | 4.0   | 4.1   | 5.2   | 5.4   |
| 2630 | 156c12 | AV631850 | LCL100g10 |                                                  |                                   | 29.5  | 52.0  | 18.2  | 1.6   | 0.6   | 5.1   | 4.9   |
| 2631 | 172a09 | BP098186 | MXL088h11 |                                                  |                                   | 12.6  | 15.5  | 4.8   | 1.2   | 0.3   | 5.1   | 4.1   |
| 2632 | 155b07 | AV631306 | LCL091g07 |                                                  |                                   | 11.2  | 16.7  | 5.2   | 1.5   | 0.6   | 5.0   | 4.4   |
| 2633 | 158a07 | BP087406 | MX033h04  |                                                  |                                   | 8.8   | 15.2  | 6.7   | 1.7   | 0.6   | 5.0   | 4.8   |
| 2634 | 172b02 | BP098206 | MXL089d01 |                                                  |                                   | 19.0  | 16.3  | 7.7   | 0.9   | 0.3   | 5.0   | 4.5   |
| 2635 | 161a10 | BP092933 | MXL001a06 |                                                  |                                   | 18.2  | 18.0  | 10.5  | 1.0   | 0.1   | 5.0   | 5.2   |
| 2636 | 157a07 | BP086519 | MX010f01  |                                                  |                                   | 11.4  | 17.9  | 3.9   | 1.8   | 1.0   | 5.0   | 1.0   |
| 2637 | 157c03 | BP086713 | MX015a07  |                                                  |                                   | 117.3 | 168.5 | 43.6  | 1.4   | 0.5   | 4.9   | 4.0   |
| 2638 | 172b08 | BP098251 | MXL090b10 |                                                  |                                   | 8.7   | 23.5  | 5.4   | 3.0   | 2.2   | 4.9   | 3.7   |
| 2639 | 030b12 | AV631464 | LCL094e05 |                                                  |                                   | 3.3   | 2.9   | 1.4   | 0.9   | 0.0   | 4.9   | 5.5   |
| 2640 | 163a06 | BP094035 | MXL017c04 |                                                  |                                   | 10.9  | 22.0  | 5.5   | 2.0   | 0.4   | 4.8   | 1.9   |
| 2641 | 156a08 | AV631687 | LCL098c03 |                                                  |                                   | 63.2  | 94.4  | 44.8  | 1.7   | 0.8   | 4.7   | 4.3   |
| 2642 | 160a08 | BP088320 | MX057c11  |                                                  |                                   | 10.0  | 14.4  | 5.3   | 1.6   | 1.0   | 4.7   | 4.1   |
| 2643 | 162d05 | BP093680 | MXL012a01 |                                                  |                                   | 6.6   | 51.0  | 10.9  | 7.8   | 2.7   | 4.7   | 1.8   |
| 2644 | 156c04 | AV631786 | LCL099h03 |                                                  |                                   | 7.7   | 15.9  | 4.4   | 2.3   | 1.1   | 4.6   | 2.9   |
| 2645 | 168a07 | BP096289 | MXL056a06 |                                                  |                                   | 11.7  | 19.4  | 10.0  | 2.0   | 1.3   | 4.5   | 4.5   |
| 2646 | 160b03 | BP088353 | MX058e04  |                                                  |                                   | 4.6   | 9.4   | 2.6   | 2.1   | 0.4   | 4.5   | 1.9   |
| 2647 | 163a08 | BP094037 | MXL017c06 |                                                  |                                   | 10.2  | 14.4  | 5.4   | 1.5   | 0.7   | 4.5   | 3.9   |
| 2648 | 169a09 | BP096807 | MXL065b12 |                                                  |                                   | 4.1   | 5.9   | 2.1   | 1.6   | 0.9   | 4.3   | 3.4   |
| 2649 | 166a11 | BP095451 | MXL042a05 |                                                  |                                   | 9.6   | 15.1  | 9.3   | 1.8   | 0.9   | 4.3   | 4.0   |
| 2650 | 163a11 | BP094062 | MXL017f04 |                                                  |                                   | 8.5   | 12.5  | 6.3   | 1.5   | 0.4   | 4.3   | 3.7   |
| 2651 | 160a11 | BP088347 | MX058d07  |                                                  |                                   | 86.6  | 152.4 | 63.1  | 1.8   | 0.2   | 4.2   | 3.5   |
| 2652 | 167a07 | BP095865 | MXL048e06 |                                                  |                                   | 25.4  | 36.7  | 20.8  | 1.7   | 1.1   | 4.2   | 4.0   |
| 2653 | 170c06 | BP097336 | MXL074a11 |                                                  |                                   | 100.4 | 138.5 | 34.8  | 1.4   | 0.1   | 4.2   | 2.1   |
| 2654 | 16     |          |           |                                                  |                                   |       |       |       |       |       |       |       |

|      | A        | B        | C         | D | E | F     | G     | H    | I    | J   | K   | L   |
|------|----------|----------|-----------|---|---|-------|-------|------|------|-----|-----|-----|
| 2673 | 157a08   | BP086532 | MX010h03  |   |   | 4.9   | 7.9   | 3.0  | 1.7  | 1.0 | 3.7 | 3.1 |
| 2674 | 011b07   | AV634389 | HC032g05  |   |   | 56.1  | 60.8  | 17.1 | 1.3  | 0.6 | 3.7 | 1.1 |
| 2675 | 005e09   | AV387560 | CM026c03  |   |   | 46.5  | 25.1  | 7.1  | 0.8  | 0.4 | 3.6 | 1.6 |
| 2676 | 169a04   | BP096779 | MXL064g02 |   |   | 7.4   | 9.6   | 4.0  | 1.3  | 0.5 | 3.6 | 3.0 |
| 2677 | 163a02   | BP094015 | MXL017a05 |   |   | 7.3   | 6.4   | 3.5  | 0.9  | 0.3 | 3.6 | 3.4 |
| 2678 | 160b11   | BP088442 | MX060f03  |   |   | 4.8   | 7.5   | 3.2  | 1.6  | 0.4 | 3.6 | 2.6 |
| 2679 | 168a12   | BP096315 | MXL056e05 |   |   | 8.0   | 11.7  | 5.6  | 1.5  | 0.2 | 3.6 | 2.8 |
| 2680 | 170b06   | BP097279 | MXL072h08 |   |   | 124.0 | 220.0 | 63.3 | 2.1  | 1.2 | 3.6 | 1.2 |
| 2681 | 171a11   | BP097716 | MXL080b12 |   |   | 124.9 | 188.4 | 99.0 | 1.5  | 0.2 | 3.5 | 2.9 |
| 2682 | 158a06   | BP087383 | MX033e01  |   |   | 18.7  | 27.0  | 9.2  | 1.5  | 0.4 | 3.5 | 2.0 |
| 2683 | 157b01   | BP086581 | MX012a11  |   |   | 11.6  | 19.3  | 7.8  | 1.6  | 0.2 | 3.5 | 2.7 |
| 2684 | 164a09   | BP094623 | MXL025h04 |   |   | 4.9   | 8.0   | 3.2  | 1.6  | 0.8 | 3.5 | 3.5 |
| 2685 | 166a03   | BP095423 | MXL041e08 |   |   | 11.6  | 12.7  | 8.0  | 1.1  | 0.2 | 3.5 | 3.3 |
| 2686 | 035d03   | BP096960 | MXL067g08 |   |   | 4.6   | 9.1   | 2.7  | 2.5  | 1.6 | 3.5 | 0.7 |
| 2687 | 171a12   | BP097724 | MXL080c10 |   |   | 24.9  | 36.2  | 15.5 | 1.4  | 0.2 | 3.5 | 2.8 |
| 2688 | 170a10   | BP097245 | MXL072d11 |   |   | 25.6  | 39.5  | 19.5 | 1.5  | 0.3 | 3.5 | 2.8 |
| 2689 | 158a11   | BP087447 | MX034g03  |   |   | 7.1   | 13.1  | 6.2  | 2.1  | 1.3 | 3.4 | 2.8 |
| 2690 | 159d11   | BP087793 | MX043g04  |   |   | 131.9 | 187.5 | 57.2 | 1.7  | 0.6 | 3.4 | 1.2 |
| 2691 | 168a11   | BP096305 | MXL056c10 |   |   | 12.8  | 15.7  | 7.6  | 1.2  | 0.2 | 3.4 | 2.7 |
| 2692 | 156b12   | AV631774 | LCL099f03 |   |   | 11.9  | 13.6  | 7.6  | 1.4  | 0.6 | 3.4 | 2.7 |
| 2693 | 156d05   | BP086072 | MX001d04  |   |   | 7.3   | 47.0  | 14.5 | 6.5  | 2.4 | 3.4 | 1.7 |
| 2694 | 018h04   | AV619185 | LCO04h06  |   |   | 8.9   | 16.7  | 4.9  | 1.9  | 0.3 | 3.4 | 0.9 |
| 2695 | 161a03   | BP089459 | MX207g04  |   |   | 8.1   | 10.3  | 4.0  | 1.3  | 0.4 | 3.4 | 2.3 |
| 2696 | 157a02   | BP086450 | MX009b02  |   |   | 5.6   | 7.0   | 2.6  | 1.4  | 0.4 | 3.4 | 1.9 |
| 2697 | 158b12   | BP087568 | MX037f06  |   |   | 24.3  | 23.7  | 11.6 | 1.0  | 0.6 | 3.3 | 3.0 |
| 2698 | 161a12   | BP092948 | MXL001c06 |   |   | 6.9   | 9.5   | 5.7  | 1.4  | 0.3 | 3.3 | 2.7 |
| 2699 | 130a09   | AV643233 | HCL066a11 |   |   | 17.9  | 34.5  | 10.9 | 1.8  | 0.6 | 3.3 | 2.1 |
| 2700 | 028b07   | AV629684 | LCL063f10 |   |   | 4.8   | 20.8  | 5.6  | 4.4  | 3.7 | 3.3 | 2.6 |
| 2701 | 165a02   | BP095012 | MXL034d07 |   |   | 10.3  | 12.5  | 6.2  | 1.3  | 0.6 | 3.3 | 2.7 |
| 2702 | 167b06   | BP095909 | MXL049b07 |   |   | 5.9   | 10.9  | 3.8  | 2.2  | 1.4 | 3.3 | 1.9 |
| 2703 | 165a11   | BP095049 | MXL035a02 |   |   | 4.8   | 6.4   | 3.7  | 1.5  | 0.6 | 3.3 | 2.8 |
| 2704 | 033b01   | BP094008 | MXL016h07 |   |   | 11.2  | 14.2  | 4.6  | 1.6  | 1.1 | 3.2 | 0.7 |
| 2705 | 162a06   | BP093453 | MXL008f03 |   |   | 13.7  | 16.9  | 8.5  | 1.3  | 0.4 | 3.2 | 2.5 |
| 2706 | 172b03   | BP098215 | MXL089e02 |   |   | 7.6   | 8.8   | 5.7  | 1.4  | 0.7 | 3.2 | 2.8 |
| 2707 | 163a03   | BP094023 | MXL017b02 |   |   | 9.7   | 10.8  | 4.8  | 1.1  | 0.4 | 3.2 | 2.3 |
| 2708 | 161b12   | BP092991 | MXL001h07 |   |   | 11.4  | 13.3  | 7.0  | 1.2  | 0.6 | 3.2 | 2.8 |
| 2709 | 171a08   | BP097708 | MXL080a10 |   |   | 10.8  | 9.5   | 7.6  | 0.9  | 0.2 | 3.2 | 3.0 |
| 2710 | 168c03   | BP096377 | MXL057g08 |   |   | 32.1  | 62.3  | 20.9 | 1.9  | 0.3 | 3.2 | 1.3 |
| 2711 | 161b02   | BP092954 | MXL001d02 |   |   | 5.3   | 8.4   | 3.6  | 1.6  | 0.2 | 3.2 | 1.9 |
| 2712 | 135f03   | AV620059 | LCO17a08  |   |   | 9.4   | 61.1  | 12.0 | 7.5  | 4.8 | 3.2 | 0.6 |
| 2713 | 155a10   | AV631283 | LCL091d08 |   |   | 8.4   | 7.5   | 4.0  | 1.0  | 0.3 | 3.2 | 2.5 |
| 2714 | 106d07   | AV397181 | CL79h09   |   |   | 4.6   | 8.5   | 2.7  | 1.9  | 0.6 | 3.2 | 0.8 |
| 2715 | 167a08   | BP095868 | MXL048e09 |   |   | 9.1   | 9.7   | 7.1  | 1.2  | 0.3 | 3.2 | 2.8 |
| 2716 | 007d01   | AV391467 | CM054g07  |   |   | 43.3  | 74.6  | 24.9 | 1.9  | 0.7 | 3.2 | 1.0 |
| 2717 | 021f01   | AV622584 | LCO51e12  |   |   | 5.6   | 13.2  | 4.5  | 2.2  | 1.1 | 3.2 | 2.4 |
| 2718 | 156b04   | AV631736 | LCL099a02 |   |   | 10.6  | 12.2  | 5.3  | 1.2  | 0.4 | 3.1 | 2.1 |
| 2719 | 166a02   | BP095416 | MXL041d12 |   |   | 7.0   | 6.1   | 2.8  | 0.8  | 0.2 | 3.1 | 2.6 |
| 2720 | 003b07   | AV396068 | CL55g01   |   |   | 97.7  | 91.1  | 30.5 | 0.9  | 0.1 | 3.1 | 0.9 |
| 2721 | 172a06   | BP098176 | MXL088g06 |   |   | 8.2   | 14.4  | 6.8  | 1.7  | 0.4 | 3.1 | 2.6 |
| 2722 | 157a03   | BP086468 | MX009e05  |   |   | 38.1  | 85.8  | 39.6 | 2.3  | 0.7 | 3.1 | 2.3 |
| 2723 | 163b11   | BP094140 | MXL018f09 |   |   | 5.0   | 8.2   | 3.5  | 1.7  | 0.2 | 3.1 | 1.7 |
| 2724 | 159c12   | BP087770 | MX043c06  |   |   | 6.5   | 18.8  | 9.6  | 3.1  | 1.3 | 3.1 | 2.6 |
| 2725 | 156a10   | AV631700 | LCL098d09 |   |   | 6.8   | 6.8   | 2.8  | 1.1  | 0.7 | 3.1 | 2.2 |
| 2726 | 168a10   | BP096298 | MXL056b12 |   |   | 13.5  | 14.3  | 7.8  | 1.1  | 0.1 | 3.1 | 2.5 |
| 2727 | 135b07   | AV619747 | LCO12f01  |   |   | 6.4   | 27.9  | 10.9 | 4.9  | 3.0 | 3.1 | 2.1 |
| 2728 | 158b03   | BP087502 | MX035g10  |   |   | 4.7   | 4.4   | 1.9  | 1.0  | 0.3 | 3.1 | 2.1 |
| 2729 | 160b04   | BP088369 | MX058g06  |   |   | 6.6   | 17.2  | 8.3  | 2.8  | 1.1 | 3.1 | 1.9 |
| 2730 | 165a12   | BP095063 | MXL035b11 |   |   | 23.0  | 22.5  | 13.9 | 1.0  | 0.1 | 3.0 | 2.5 |
| 2731 | 158b11   | BP087560 | MX037d12  |   |   | 8.2   | 12.3  | 5.6  | 1.7  | 1.2 | 3.0 | 2.5 |
| 2732 | 112e05   | BP096549 | MX048c05  |   |   | 15.4  | 41.0  | 13.2 | 2.6  | 0.6 | 3.0 | 0.5 |
| 2733 | 122a09   | AV637826 | HC078a08  |   |   | 105.1 | 121.2 | 41.8 | 1.2  | 0.1 | 3.0 | 1.1 |
| 2734 | 152h01   | AV630173 | LCL074g11 |   |   | 47.6  | 46.6  | 17.9 | 1.1  | 0.3 | 3.0 | 1.7 |
| 2735 | 033e11   | BP094576 | MXL025b08 |   |   | 34.2  | 54.7  | 22.9 | 1.7  | 0.3 | 3.0 | 1.4 |
| 2736 | 159c05   | BP087755 | MX043a02  |   |   | 14.7  | 26.2  | 8.5  | 1.9  | 1.0 | 3.0 | 0.8 |
| 2737 | 159a11   | BP087731 | MX042e01  |   |   | 84.1  | 129.6 | 80.7 | 1.5  | 0.2 | 3.0 | 2.5 |
| 2738 | 155b02   | AV631294 | LCL091e12 |   |   | 8.7   | 10.8  | 6.2  | 1.4  | 0.8 | 3.0 | 2.7 |
| 2739 | 167a04   | BP095857 | MXL048d08 |   |   | 20.2  | 23.0  | 16.1 | 1.3  | 0.6 | 3.0 | 2.8 |
| 2740 | 158a03   | BP087343 | MX032e02  |   |   | 31.1  | 42.3  | 20.5 | 1.4  | 0.5 | 3.0 | 2.3 |
| 2741 | 165c09   | BP095147 | MXL036f03 |   |   | 157.4 | 229.6 | 76.6 | 1.5  | 0.5 | 3.0 | 0.3 |
| 2742 | 006g03   | AV390392 | CM045h11  |   |   | 10.9  | 26.3  | 9.1  | 2.4  | 0.4 | 3.0 | 0.7 |
| 2743 | 171a07   | BP097700 | MXL079h05 |   |   | 5.2   | 5.8   | 3.2  | 1.3  | 0.9 | 3.0 | 2.4 |
| 2744 | 158c04   | BP087590 | MX038c04  |   |   | 3.6   | 5.6   | 2.6  | 1.8  | 1.1 | 2.9 | 2.2 |
| 2745 | 024f11   | AV626744 | LCL014g04 |   |   | 33.3  | 37.4  | 12.9 | 1.1  | 0.0 | 2.9 | 0.4 |
| 2746 | 134b06   | AV619017 | LCO02f06  |   |   | 13.9  | 34.7  | 13.6 | 2.3  | 2.0 | 2.9 | 3.3 |
| 2747 | 167b11   | BP095942 | MXL049g07 |   |   | 8.9   | 11.9  | 5.3  | 1.4  | 0.5 | 2.9 | 1.9 |
| 2748 | 162b11   | BP093554 | MXL010a10 |   |   | 3.2   | 4.6   | 2.3  | 1.6  | 0.6 | 2.9 | 2.2 |
| 2749 | 019a12   | AV619516 | LCO09d05  |   |   | 35.3  | 38.1  | 13.0 | 1.3  | 0.7 | 2.9 | 0.8 |
| 2750 | 156b10   | AV631750 | LCL099b09 |   |   | 13.9  | 15.5  | 8.6  | 1.5  | 0.8 | 2.9 | 2.1 |
| 2751 | 158b02   | BP087494 | MX035f09  |   |   | 12.7  | 17.6  | 7.1  | 1.5  | 0.6 | 2.9 | 1.1 |
| 2752 | 138a05   | AV622043 | LCO44c09  |   |   | 61.5  | 73.7  | 25.8 | 1.9  | 1.2 | 2.9 | 0.4 |
| 2753 | 105a08   | AV396286 | CL57a06   |   |   | 2.8   | 3.5   | 1.3  | 1.3  | 0.3 | 2.9 | 1.3 |
| 2754 | 137a08   | AV621180 | LCO32d01  |   |   | 9.7   | 14.6  | 5.1  | 1.6  | 0.9 | 2.9 | 1.2 |
| 2755 | 164a07   | BP094618 | MXL025g07 |   |   | 8.3   | 12.1  | 6.5  | 1.6  | 0.7 | 2.8 | 2.2 |
| 2756 | 162a09   | BP093465 | MXL008g06 |   |   | 15.6  | 20.7  | 10.8 | 1.3  | 0.2 | 2.8 | 2.1 |
| 2757 | 158b04   | BP087508 | MX035h12  |   |   | 37.3  | 52.5  | 24.0 | 1.4  | 0.4 | 2.8 | 2.1 |
| 2758 | 144g03   | AV626344 | LCL007d02 |   |   | 79.7  | 73.0  | 30.0 | 0.9  | 0.1 | 2.8 | 2.5 |
| 2759 | 115a10   | AV390348 | CM083h07  |   |   | 6.2   | 14.8  | 5.3  | 2.4  | 0.2 | 2.8 | 0.6 |
| 2760 | 164a05   | BP094606 | MXL025e12 |   |   | 51.0  | 33.3  | 22.3 | 0.6  | 0.3 | 2.8 | 2.8 |
| 2761 | 118f04   | AV633991 | HC027g12  |   |   | 6.1   | 10.8  | 4.3  | 1.7  | 0.8 | 2.8 | 1.8 |
| 2762 | 155h06   | AV631644 | LCL097e03 |   |   | 24.8  | 59.9  | 25.0 | 2.1  | 1.6 | 2.8 | 2.8 |
| 2763 | 158a08   | BP087434 | MX034d11  |   |   | 10.8  | 14.3  | 8.4  | 1.4  | 0.7 | 2.8 | 2.4 |
| 2764 | 166a12   | BP095452 | MXL042a06 |   |   | 8.2   | 9.5   | 5.5  | 1.2  | 0.0 | 2.8 | 2.0 |
| 2765 | 165a10   | BP095040 | MXL034h04 |   |   | 5.8   | 6.3   | 3.5  | 1.1  | 0.2 | 2.8 | 2.5 |
| 2766 | 149c01   | AV628412 | LCL041d06 |   |   | 31.3  | 47.4  | 25.7 | 1.7  | 1.3 | 2.8 | 2.6 |
| 2767 | 028d01   | AV629866 | LCL067h09 |   |   | 1.4   | 20.3  | 8.3  | 15.6 | 7.3 | 2.8 | 1.6 |
| 2768 | 168a09   | BP096297 | MXL056b11 |   |   | 9.4   | 12.2  | 6.3  | 1.4  | 0.6 | 2.8 | 2.1 |
| 2769 | 167a05   | BP095861 | MXL048e02 |   |   | 12.6  | 16.3  | 10.6 | 1.3  | 0.1 | 2.8 | 2.4 |
| 2770 | 157a05   | BP086484 | MX009h06  |   |   | 8.7   | 10.6  | 6.4  | 1.3  | 0.3 | 2.8 | 1.9 |
| 2771 | 163b10   | BP094134 | MXL018f03 |   |   | 5.4   | 8.1   | 4.5  | 1.7  | 0.7 | 2.8 | 2.0 |
| 2772 | 163c11   | BP094209 | MXL019f01 |   |   | 4.0   | 8.9   | 4.1  | 2.4  | 1.3 | 2.7 | 2.0 |
| 2773 | 157a06   | BP086513 | MX010e05  |   |   | 4.4   | 6.4   | 2.7  | 1.5  | 0.4 | 2.7 | 1.3 |
| 2774 | 104c12   | AV395814 | CL48h03   |   |   | 4.1   | 5.3   | 3.1  | 1.4  | 0.7 | 2.7 | 2.3 |
| 2775 | 170e12   | BP097481 | MXL076d11 |   |   | 24.2  | 64.8  | 23.5 | 2.6  | 0.5 | 2.7 | 0.5 |
| 2776 | 166a06   | BP095428 | MXL041f06 |   |   | 25.8  | 32.5  | 14.3 | 1.3  | 0.4 | 2.7 | 1.3 |
| 2777 | 156a03   | AV631670 | LCL097h12 |   |   | 21.5  | 26.7  | 10.2 | 1.3  | 0.4 | 2.7 | 1.0 |
| 2778 | 155b01   | BP098885 | MXL100g11 |   |   | 6.6   | 6.3   | 3.3  | 1.0  | 0.3 | 2.7 | 1.6 |
| 2779 | 134e03</ |          |           |   |   |       |       |      |      |     |     |     |

|      | A      | B        | C         | D | E | F     | G     | H     | I   | J   | K   | L   |
|------|--------|----------|-----------|---|---|-------|-------|-------|-----|-----|-----|-----|
| 2780 | 172a12 | BP098194 | MXL089b02 |   |   | 209.3 | 286.2 | 134.2 | 1.4 | 0.3 | 2.7 | 1.5 |
| 2781 | 124d07 | AV640135 | HCL011a06 |   |   | 18.2  | 39.4  | 17.7  | 2.2 | 0.9 | 2.7 | 1.9 |
| 2782 | 029d12 | AV630861 | LCL085d01 |   |   | 5.6   | 15.1  | 6.0   | 2.6 | 1.9 | 2.7 | 2.3 |
| 2783 | 172a02 | BP098169 | MXL088f03 |   |   | 15.4  | 13.6  | 9.4   | 0.9 | 0.1 | 2.7 | 2.1 |
| 2784 | 156c02 | AV631781 | LCL099g04 |   |   | 9.3   | 19.2  | 9.6   | 2.1 | 0.4 | 2.7 | 1.5 |
| 2785 | 165a06 | BP095030 | MXL034g01 |   |   | 7.6   | 9.3   | 5.1   | 1.4 | 0.7 | 2.7 | 2.1 |
| 2786 | 028h01 | AV630327 | LCL077c09 |   |   | 19.8  | 18.9  | 7.0   | 1.3 | 0.6 | 2.7 | 0.3 |
| 2787 | 159c04 | BP087754 | MX042h11  |   |   | 8.0   | 15.7  | 7.0   | 2.1 | 0.7 | 2.7 | 1.4 |
| 2788 | 166b10 | BP095501 | MXL042g09 |   |   | 11.5  | 14.9  | 7.2   | 1.2 | 0.2 | 2.7 | 2.1 |
| 2789 | 166a01 | BP095414 | MXL041d08 |   |   | 7.0   | 8.3   | 4.9   | 1.4 | 0.7 | 2.7 | 2.1 |
| 2790 | 020e01 | AV621089 | LC031a12  |   |   | 9.2   | 22.4  | 8.8   | 2.5 | 1.0 | 2.7 | 1.1 |
| 2791 | 157b02 | BP086589 | MX012d02  |   |   | 68.9  | 80.5  | 32.3  | 1.2 | 0.0 | 2.7 | 1.4 |
| 2792 | 150b08 | AV628895 | LCL048f02 |   |   | 4.4   | 7.8   | 2.8   | 1.9 | 1.3 | 2.7 | 1.5 |
| 2793 | 155a12 | AV631288 | LCL091e02 |   |   | 4.7   | 4.5   | 3.0   | 1.0 | 0.2 | 2.7 | 2.3 |
| 2794 | 124a06 | AV639943 | HCL007f07 |   |   | 17.0  | 11.5  | 4.3   | 1.1 | 0.7 | 2.7 | 0.2 |
| 2795 | 135g10 | AV620236 | LC019d04  |   |   | 5.8   | 16.7  | 6.2   | 2.8 | 1.1 | 2.7 | 1.0 |
| 2796 | 023h01 | AV626132 | LCL002h05 |   |   | 24.7  | 24.5  | 9.7   | 1.0 | 0.1 | 2.7 | 0.7 |
| 2797 | 162a03 | BP093418 | MXL008b05 |   |   | 25.7  | 22.9  | 11.0  | 0.9 | 0.4 | 2.7 | 2.0 |
| 2798 | 159b12 | BP087749 | MX042g12  |   |   | 36.0  | 36.3  | 22.8  | 1.0 | 0.3 | 2.6 | 2.4 |
| 2799 | 168a06 | BP096282 | MXL055h09 |   |   | 62.4  | 76.3  | 44.5  | 1.2 | 0.5 | 2.6 | 2.2 |
| 2800 | 136c06 | AV620610 | LC024d01  |   |   | 15.3  | 28.7  | 12.9  | 1.8 | 0.6 | 2.6 | 2.0 |
| 2801 | 160b02 | BP088350 | MX058e01  |   |   | 6.5   | 7.5   | 3.8   | 1.1 | 0.2 | 2.6 | 1.6 |
| 2802 | 160a02 | BP088251 | MX055d04  |   |   | 9.2   | 8.7   | 4.4   | 1.0 | 0.1 | 2.6 | 1.6 |
| 2803 | 162b10 | BP093537 | MXL009g10 |   |   | 10.7  | 14.5  | 8.3   | 1.4 | 0.3 | 2.6 | 1.8 |
| 2804 | 161c04 | BP093004 | MXL002a09 |   |   | 5.1   | 6.9   | 4.1   | 1.5 | 0.6 | 2.6 | 1.9 |
| 2805 | 158b06 | BP087522 | MX036d04  |   |   | 5.1   | 6.7   | 2.9   | 1.3 | 0.2 | 2.6 | 1.0 |
| 2806 | 164b12 | BP094666 | MXL026g09 |   |   | 5.2   | 11.4  | 5.7   | 2.5 | 1.0 | 2.6 | 1.4 |
| 2807 | 163b02 | BP094082 | MXL017h07 |   |   | 3.5   | 5.5   | 2.5   | 1.6 | 0.4 | 2.6 | 1.1 |
| 2808 | 120c06 | AV635916 | HC052f06  |   |   | 13.3  | 25.6  | 10.3  | 2.0 | 0.4 | 2.6 | 0.9 |
| 2809 | 172a04 | BP098174 | MXL088g04 |   |   | 45.4  | 65.3  | 39.1  | 1.4 | 0.4 | 2.6 | 2.2 |
| 2810 | 162e04 | BP093754 | MXL013b08 |   |   | 11.6  | 36.4  | 14.2  | 3.1 | 0.3 | 2.6 | 0.7 |
| 2811 | 145a02 | AV626451 | LCL009c09 |   |   | 8.0   | 32.5  | 13.1  | 4.0 | 0.8 | 2.6 | 0.5 |
| 2812 | 155b10 | AV631321 | LCL092a02 |   |   | 9.9   | 9.7   | 6.0   | 1.2 | 0.7 | 2.6 | 2.0 |
| 2813 | 155c02 | AV631338 | LCL092c05 |   |   | 302.2 | 407.9 | 376.8 | 1.6 | 0.8 | 2.6 | 2.4 |
| 2814 | 168b01 | BP096319 | MXL056f02 |   |   | 8.7   | 10.1  | 5.3   | 1.2 | 0.1 | 2.6 | 1.5 |
| 2815 | 171b04 | BP097744 | MXL080f06 |   |   | 4.3   | 7.4   | 3.7   | 2.2 | 1.7 | 2.6 | 1.6 |
| 2816 | 159a04 | BP087721 | MX042c08  |   |   | 18.5  | 13.4  | 8.6   | 0.7 | 0.4 | 2.6 | 2.5 |
| 2817 | 160a07 | BP088273 | MX055h07  |   |   | 6.4   | 6.0   | 3.6   | 0.9 | 0.1 | 2.6 | 1.9 |
| 2818 | 159a07 | BP087725 | MX042c02  |   |   | 3.3   | 4.2   | 2.3   | 1.3 | 0.4 | 2.6 | 1.7 |
| 2819 | 137g11 | AV621903 | LC042d08  |   |   | 27.3  | 24.6  | 9.8   | 1.0 | 0.3 | 2.6 | 0.4 |
| 2820 | 035f02 | BP097200 | MXL071f11 |   |   | 6.3   | 7.8   | 4.3   | 1.2 | 0.2 | 2.6 | 1.5 |
| 2821 | 168c12 | BP096425 | MXL058e09 |   |   | 31.7  | 35.3  | 16.5  | 1.1 | 0.1 | 2.6 | 1.6 |
| 2822 | 162c09 | BP093642 | MXL011d05 |   |   | 33.9  | 28.0  | 13.4  | 0.9 | 0.4 | 2.5 | 1.8 |
| 2823 | 102a03 | AV394133 | CL17f03   |   |   | 2.2   | 1.9   | 2.2   | 1.2 | 0.6 | 2.5 | 3.7 |
| 2824 | 140h03 | AV624107 | LC073a07  |   |   | 151.9 | 130.8 | 68.7  | 0.9 | 0.0 | 2.5 | 2.1 |
| 2825 | 030h08 | BP086268 | MX005d05  |   |   | 12.5  | 14.9  | 5.9   | 1.2 | 0.1 | 2.5 | 0.5 |
| 2826 | 160d05 | BP088585 | MX064c10  |   |   | 9.4   | 29.1  | 11.5  | 3.4 | 2.7 | 2.5 | 1.4 |
| 2827 | 160a05 | BP088266 | MX055g09  |   |   | 20.2  | 22.6  | 12.9  | 1.1 | 0.3 | 2.5 | 2.0 |
| 2828 | 167a03 | BP095851 | MXL048c12 |   |   | 10.0  | 12.9  | 6.8   | 1.3 | 0.3 | 2.5 | 1.4 |
| 2829 | 159c02 | BP087751 | MX042h03  |   |   | 6.7   | 12.0  | 6.7   | 2.0 | 0.8 | 2.5 | 1.5 |
| 2830 | 157b07 | BP086614 | MX012h03  |   |   | 3.2   | 4.3   | 2.5   | 1.9 | 1.1 | 2.5 | 1.6 |
| 2831 | 138c05 | AV622178 | LC046b09  |   |   | 11.3  | 34.2  | 14.2  | 3.0 | 0.8 | 2.5 | 0.4 |
| 2832 | 162a01 | BP093404 | MXL007h10 |   |   | 10.7  | 12.1  | 7.6   | 1.3 | 0.7 | 2.5 | 2.1 |
| 2833 | 007g04 | AV392251 | CM059g10  |   |   | 8.1   | 27.1  | 11.1  | 3.3 | 0.2 | 2.5 | 0.7 |
| 2834 | 158e07 | BP087659 | MX040e04  |   |   | 113.5 | 145.0 | 64.4  | 1.2 | 0.7 | 2.5 | 2.1 |
| 2835 | 170a04 | BP097206 | MXL071g08 |   |   | 7.1   | 5.5   | 3.3   | 0.9 | 0.4 | 2.5 | 1.7 |
| 2836 | 109e12 | AV387715 | CM027g09  |   |   | 12.3  | 14.5  | 5.9   | 1.3 | 0.4 | 2.5 | 0.4 |
| 2837 | 161c05 | BP093012 | MXL002b05 |   |   | 123.3 | 231.6 | 100.1 | 1.8 | 0.6 | 2.5 | 1.4 |
| 2838 | 134f12 | AV619484 | LC008h11  |   |   | 13.4  | 23.5  | 9.5   | 1.8 | 0.2 | 2.5 | 0.1 |
| 2839 | 157b06 | BP086611 | MX012g12  |   |   | 5.6   | 6.8   | 3.3   | 1.2 | 0.2 | 2.5 | 1.3 |
| 2840 | 115e07 | AV391080 | CM089b05  |   |   | 42.9  | 46.1  | 19.5  | 1.1 | 0.1 | 2.5 | 0.8 |
| 2841 | 155a09 | AV631280 | LCL091d04 |   |   | 21.5  | 26.0  | 13.5  | 1.2 | 0.2 | 2.5 | 1.3 |
| 2842 | 143e02 | AV625742 | LC097c05  |   |   | 10.7  | 16.5  | 7.1   | 1.8 | 0.9 | 2.5 | 1.0 |
| 2843 | 157c02 | BP086707 | MX014h07  |   |   | 42.6  | 52.3  | 27.2  | 1.2 | 0.5 | 2.5 | 1.9 |
| 2844 | 172a10 | BP098187 | MXL089a01 |   |   | 18.9  | 16.3  | 13.9  | 1.0 | 0.4 | 2.5 | 2.0 |
| 2845 | 166a04 | BP095424 | MXL041e09 |   |   | 8.0   | 8.9   | 5.0   | 1.2 | 0.4 | 2.5 | 1.8 |
| 2846 | 145c07 | AV626593 | LCL012a06 |   |   | 7.6   | 17.7  | 7.0   | 2.2 | 0.6 | 2.5 | 0.7 |
| 2847 | 004d03 | AV386830 | CM007e07  |   |   | 34.0  | 31.0  | 11.4  | 1.0 | 0.5 | 2.4 | 1.6 |
| 2848 | 163a12 | BP094075 | MXL017g10 |   |   | 4.7   | 4.4   | 3.3   | 0.9 | 0.1 | 2.4 | 2.1 |
| 2849 | 153f01 | AV630557 | LCL080f11 |   |   | 15.9  | 14.7  | 6.7   | 1.0 | 0.3 | 2.4 | 1.2 |
| 2850 | 162a07 | BP093455 | MXL008f05 |   |   | 13.3  | 13.3  | 7.3   | 1.0 | 0.2 | 2.4 | 1.5 |
| 2851 | 162a12 | BP093492 | MXL009b07 |   |   | 6.1   | 6.8   | 3.6   | 1.1 | 0.3 | 2.4 | 1.7 |
| 2852 | 035e02 | BP097042 | MXL069b02 |   |   | 6.4   | 10.0  | 4.1   | 1.6 | 0.3 | 2.4 | 0.1 |
| 2853 | 166b02 | BP095457 | MXL042b01 |   |   | 30.8  | 50.1  | 23.5  | 1.7 | 0.5 | 2.4 | 0.9 |
| 2854 | 156b08 | AV631748 | LCL099b07 |   |   | 9.5   | 31.2  | 14.2  | 3.5 | 1.1 | 2.4 | 0.7 |
| 2855 | 168a08 | BP096293 | MXL056b02 |   |   | 4.9   | 5.4   | 4.2   | 1.2 | 0.3 | 2.4 | 1.8 |
| 2856 | 171g11 | BP098105 | MXL087b08 |   |   | 87.4  | 89.5  | 36.5  | 1.1 | 0.6 | 2.4 | 0.5 |
| 2857 | 142a09 | AV624891 | LC084b08  |   |   | 14.5  | 18.2  | 7.8   | 1.3 | 0.3 | 2.4 | 0.6 |
| 2858 | 151a12 | AV629332 | LCL056g06 |   |   | 26.6  | 39.7  | 23.3  | 1.9 | 1.4 | 2.4 | 2.0 |
| 2859 | 136f04 | BP383787 | LC026h09  |   |   | 9.0   | 11.0  | 4.8   | 1.2 | 0.1 | 2.4 | 0.8 |
| 2860 | 163c08 | BP094188 | MXL019c12 |   |   | 109.9 | 176.8 | 81.1  | 1.7 | 0.3 | 2.4 | 1.1 |
| 2861 | 156b01 | AV631722 | LCL098g02 |   |   | 5.0   | 6.1   | 3.0   | 1.2 | 0.3 | 2.4 | 1.2 |
| 2862 | 016b02 | AV641684 | HCL038f07 |   |   | 4.4   | 8.7   | 3.5   | 2.0 | 0.4 | 2.4 | 0.6 |
| 2863 | 164c09 | BP094713 | MXL027h12 |   |   | 399.2 | 489.4 | 211.0 | 1.2 | 0.2 | 2.4 | 1.1 |
| 2864 | 137h05 | AV621941 | LC042h07  |   |   | 43.3  | 44.6  | 20.9  | 1.0 | 0.2 | 2.4 | 1.4 |
| 2865 | 168e05 | BP096549 | MXL060e10 |   |   | 27.7  | 63.3  | 26.6  | 2.3 | 0.4 | 2.4 | 0.6 |
| 2866 | 170a11 | BP097250 | MXL072e06 |   |   | 9.6   | 11.7  | 8.9   | 1.3 | 0.3 | 2.4 | 1.8 |
| 2867 | 167b05 | BP095908 | MXL049b04 |   |   | 5.0   | 6.2   | 4.9   | 2.0 | 1.4 | 2.4 | 2.0 |
| 2868 | 168b06 | BP096332 | MXL057a01 |   |   | 5.4   | 7.6   | 3.2   | 1.4 | 0.6 | 2.4 | 0.9 |
| 2869 | 158a01 | BP087327 | MX031h08  |   |   | 8.2   | 13.4  | 8.3   | 1.9 | 0.8 | 2.4 | 1.5 |
| 2870 | 006h01 | AV390573 | CM047a01  |   |   | 74.4  | 89.3  | 37.4  | 1.2 | 0.2 | 2.4 | 0.4 |
| 2871 | 025d01 | AV627287 | LCL024d10 |   |   | 13.6  | 14.7  | 16.8  | 1.1 | 0.1 | 2.4 | 2.2 |
| 2872 | 156b07 | AV631744 | LCL099a11 |   |   | 13.1  | 29.2  | 12.4  | 2.2 | 0.3 | 2.4 | 0.4 |
| 2873 | 171c12 | BP097850 | MXL082d01 |   |   | 47.2  | 69.0  | 35.8  | 1.5 | 0.2 | 2.4 | 1.4 |
| 2874 | 122d05 | AV638221 | HC083e02  |   |   | 27.9  | 31.4  | 13.6  | 1.2 | 0.3 | 2.4 | 0.7 |
| 2875 | 163b01 | BP094077 | MXL017h01 |   |   | 6.1   | 6.6   | 4.4   | 1.2 | 0.5 | 2.4 | 1.8 |
| 2876 | 022g09 | AV624266 | LC075c09  |   |   | 50.6  | 55.8  | 25.0  | 1.1 | 0.2 | 2.4 | 1.1 |
| 2877 | 165a03 | BP095014 | MXL034d11 |   |   | 42.4  | 46.0  | 25.9  | 1.1 | 0.3 | 2.4 | 1.6 |
| 2878 | 032c01 | BP093052 | MXL002f11 |   |   | 16.8  | 13.9  | 9.1   | 0.8 | 0.1 | 2.4 | 2.0 |
| 2879 | 171a06 | BP097696 | MXL079g12 |   |   | 12.7  | 14.9  | 8.7   | 1.2 | 0.2 | 2.4 | 1.4 |
| 2880 | 029h11 | AV631230 | LCL090f01 |   |   | 9.5   | 14.4  | 7.3   | 1.4 | 0.7 | 2.4 | 2.1 |
| 2881 | 157b10 | BP086676 | MX014b11  |   |   | 5.9   | 11.6  | 6.5   | 2.2 | 0.5 | 2.4 | 1.4 |
| 2882 | 161a11 | BP092940 | MXL001b05 |   |   | 61.0  | 65.9  | 42.1  | 1.1 | 0.2 | 2.4 | 1.7 |
| 2883 | 134g10 | AV619535 | LC009f08  |   |   | 22.4  | 97.6  | 43.8  | 4.7 | 1.5 | 2.4 | 0.7 |
| 2884 | 158c02 | BP087574 | MX037g03  |   |   | 25.4  | 35.2  | 27.2  | 1.4 | 0.4 | 2.4 | 2.0 |
| 2885 | 160a03 | BP088257 | MX055f04  |   |   | 23.7  | 23.2  | 12.2  | 1.0 | 0.4 | 2.4 |     |

|      | A      | B        | C         | D | E | F     | G     | H     | I   | J   | K   | L   |
|------|--------|----------|-----------|---|---|-------|-------|-------|-----|-----|-----|-----|
| 2887 | 134f01 | AV619407 | LC007h11  |   |   | 9.4   | 19.3  | 8.1   | 2.0 | 0.8 | 2.4 | 1.0 |
| 2888 | 161b04 | BP092963 | MXL001e03 |   |   | 8.9   | 7.8   | 5.2   | 0.9 | 0.0 | 2.4 | 1.7 |
| 2889 | 030f12 | BP086110 | MX002b05  |   |   | 4.9   | 30.0  | 13.4  | 6.0 | 1.4 | 2.4 | 0.3 |
| 2890 | 001b02 | AV393361 | CL04b03   |   |   | 5.2   | 10.7  | 4.6   | 2.1 | 0.8 | 2.4 | 0.5 |
| 2891 | 172a01 | BP098168 | MXL08f02  |   |   | 12.5  | 12.3  | 8.8   | 1.1 | 0.5 | 2.3 | 1.8 |
| 2892 | 004a12 | AV397883 | CM002g12  |   |   | 6.5   | 8.3   | 4.7   | 1.7 | 1.6 | 2.3 | 2.1 |
| 2893 | 127d12 | AV641809 | HCL040f08 |   |   | 26.8  | 48.9  | 20.4  | 1.8 | 0.3 | 2.3 | 0.5 |
| 2894 | 162e02 | BP093741 | MXL012h09 |   |   | 17.3  | 35.5  | 15.1  | 2.1 | 0.6 | 2.3 | 0.6 |
| 2895 | 160a09 | BP088332 | MX05g04   |   |   | 12.7  | 16.4  | 9.3   | 1.3 | 0.4 | 2.3 | 1.6 |
| 2896 | 147d01 | AV627495 | LCL027f02 |   |   | 7.2   | 10.1  | 4.8   | 1.4 | 0.7 | 2.3 | 1.7 |
| 2897 | 162c02 | BP093582 | MXL010e01 |   |   | 5.0   | 8.3   | 4.1   | 1.9 | 0.9 | 2.3 | 1.1 |
| 2898 | 165e07 | BP095239 | MXL038f06 |   |   | 150.4 | 208.7 | 89.9  | 1.4 | 0.4 | 2.3 | 0.2 |
| 2899 | 008a07 | AV392768 | CM063g08  |   |   | 30.0  | 44.0  | 19.0  | 2.1 | 1.4 | 2.3 | 0.4 |
| 2900 | 163b09 | BP094126 | MXL018e05 |   |   | 20.0  | 26.2  | 14.3  | 1.3 | 0.5 | 2.3 | 1.6 |
| 2901 | 016h05 | AV642676 | HCL055h04 |   |   | 0.7   | 0.9   | 0.6   | 2.9 | 3.6 | 2.3 | 1.7 |
| 2902 | 167a02 | BP095849 | MXL048c08 |   |   | 6.6   | 9.8   | 6.5   | 1.5 | 0.7 | 2.3 | 2.0 |
| 2903 | 151a09 | AV629314 | LCL056d06 |   |   | 145.9 | 147.4 | 77.2  | 1.1 | 0.1 | 2.3 | 1.6 |
| 2904 | 168b03 | BP096322 | MXL056g01 |   |   | 18.3  | 22.1  | 12.3  | 1.2 | 0.3 | 2.3 | 1.3 |
| 2905 | 123c10 | AV639494 | HC100a12  |   |   | 32.1  | 21.1  | 10.1  | 0.8 | 0.3 | 2.3 | 1.1 |
| 2906 | 165a07 | BP095032 | MXL034g03 |   |   | 12.4  | 18.1  | 10.4  | 1.5 | 0.2 | 2.3 | 1.4 |
| 2907 | 007e04 | AV391824 | CM056f05  |   |   | 6.0   | 7.9   | 3.5   | 1.4 | 0.2 | 2.3 | 0.5 |
| 2908 | 164c03 | BP094676 | MXL027a10 |   |   | 7.8   | 11.5  | 5.7   | 1.9 | 1.3 | 2.3 | 1.2 |
| 2909 | 019a01 | AV619350 | LC007a12  |   |   | 22.2  | 38.6  | 19.7  | 2.0 | 1.3 | 2.3 | 1.5 |
| 2910 | 004b07 | AV386564 | CM003h01  |   |   | 25.4  | 16.6  | 16.8  | 0.8 | 0.2 | 2.3 | 2.5 |
| 2911 | 029a01 | AV630446 | LCL079a01 |   |   | 9.3   | 15.1  | 6.9   | 1.8 | 1.3 | 2.3 | 1.5 |
| 2912 | 002d12 | AV395380 | CL40h12   |   |   | 7.0   | 7.3   | 3.3   | 1.0 | 0.4 | 2.3 | 1.0 |
| 2913 | 160c01 | BP088463 | MX061a11  |   |   | 185.2 | 282.3 | 155.2 | 1.5 | 0.2 | 2.3 | 1.4 |
| 2914 | 011h06 | AV635680 | HC049e02  |   |   | 18.8  | 15.0  | 6.5   | 0.8 | 0.1 | 2.3 | 0.6 |
| 2915 | 155a07 | AV631258 | LCL091a05 |   |   | 4.5   | 4.1   | 2.6   | 1.0 | 0.4 | 2.3 | 1.5 |
| 2916 | 148f09 | AV628135 | LCL037c08 |   |   | 26.4  | 43.3  | 24.3  | 1.6 | 1.2 | 2.3 | 2.1 |
| 2917 | 167b03 | BP095898 | MXL049a04 |   |   | 26.8  | 23.3  | 12.3  | 0.9 | 0.2 | 2.3 | 1.3 |
| 2918 | 003d06 | AV396314 | CL61g12   |   |   | 21.8  | 33.9  | 14.8  | 1.8 | 0.8 | 2.3 | 0.3 |
| 2919 | 163a04 | BP094029 | MXL017b10 |   |   | 12.9  | 11.2  | 8.1   | 1.0 | 0.5 | 2.3 | 2.0 |
| 2920 | 168b05 | BP096325 | MXL056g09 |   |   | 43.7  | 39.3  | 31.0  | 1.2 | 0.9 | 2.3 | 2.1 |
| 2921 | 103g09 | AV395490 | CL42b10   |   |   | 4.2   | 6.0   | 3.1   | 1.5 | 0.3 | 2.3 | 1.5 |
| 2922 | 161a06 | BP089472 | MX207h07  |   |   | 9.4   | 9.9   | 6.5   | 1.1 | 0.3 | 2.3 | 1.6 |
| 2923 | 163a01 | BP094014 | MXL017a03 |   |   | 14.0  | 13.5  | 8.2   | 1.0 | 0.4 | 2.3 | 1.6 |
| 2924 | 139c01 | AV622904 | LC056d02  |   |   | 11.3  | 10.2  | 4.7   | 0.9 | 0.1 | 2.3 | 0.6 |
| 2925 | 114d02 | AV389240 | CM075h07  |   |   | 29.9  | 40.6  | 18.6  | 1.5 | 0.5 | 2.3 | 0.7 |
| 2926 | 160b08 | BP088401 | MX059e04  |   |   | 8.3   | 22.5  | 11.0  | 2.8 | 1.5 | 2.3 | 1.1 |
| 2927 | 162b08 | BP093524 | MXL009f05 |   |   | 16.1  | 42.9  | 22.0  | 2.7 | 0.3 | 2.3 | 0.8 |
| 2928 | 148c07 | AV627941 | LCL034b12 |   |   | 8.4   | 20.2  | 8.6   | 2.3 | 1.2 | 2.3 | 1.3 |
| 2929 | 122f02 | AV638566 | HC088a05  |   |   | 13.9  | 20.1  | 10.0  | 1.5 | 0.7 | 2.3 | 1.6 |
| 2930 | 132h02 | AV644844 | HCL094e12 |   |   | 4.9   | 28.5  | 12.7  | 6.0 | 2.0 | 2.3 | 0.5 |
| 2931 | 169a07 | BP096795 | MXL065a05 |   |   | 4.7   | 5.8   | 3.9   | 1.3 | 0.3 | 2.3 | 1.7 |
| 2932 | 136b10 | AV620561 | LC023g01  |   |   | 10.3  | 16.6  | 9.2   | 1.5 | 0.4 | 2.3 | 1.8 |
| 2933 | 172b12 | BP098282 | MXL090g10 |   |   | 41.1  | 57.9  | 41.2  | 1.5 | 0.7 | 2.2 | 1.7 |
| 2934 | 137d01 | AV621491 | LC036h02  |   |   | 287.7 | 193.4 | 93.7  | 0.7 | 0.0 | 2.2 | 1.6 |
| 2935 | 162b05 | BP093517 | MXL009e07 |   |   | 16.6  | 18.3  | 12.3  | 1.6 | 1.0 | 2.2 | 1.6 |
| 2936 | 155b08 | AV631313 | LCL091h06 |   |   | 7.2   | 11.4  | 5.5   | 1.8 | 0.6 | 2.2 | 0.5 |
| 2937 | 137d12 | AV621596 | LC038c04  |   |   | 4.7   | 9.4   | 4.6   | 2.0 | 0.7 | 2.2 | 1.1 |
| 2938 | 164c12 | BP094720 | MXL028b08 |   |   | 14.0  | 24.4  | 12.9  | 1.7 | 0.2 | 2.2 | 1.1 |
| 2939 | 127b06 | AV641664 | HCL038d01 |   |   | 32.2  | 67.6  | 29.9  | 2.1 | 0.4 | 2.2 | 0.3 |
| 2940 | 169a01 | BP096763 | MXL064e04 |   |   | 5.7   | 5.9   | 3.4   | 1.2 | 0.7 | 2.2 | 1.5 |
| 2941 | 166b04 | BP095473 | MXL042d04 |   |   | 6.9   | 9.5   | 5.5   | 1.7 | 0.8 | 2.2 | 1.3 |
| 2942 | 156b09 | AV631749 | LCL099b08 |   |   | 51.8  | 49.0  | 33.6  | 1.0 | 0.5 | 2.2 | 2.0 |
| 2943 | 162a08 | BP093463 | MXL008g04 |   |   | 10.6  | 13.1  | 10.3  | 1.4 | 0.7 | 2.2 | 1.9 |
| 2944 | 144b08 | AV626163 | LCL003d07 |   |   | 14.0  | 23.0  | 10.8  | 1.6 | 0.2 | 2.2 | 0.5 |
| 2945 | 144b06 | AV626159 | LCL003c12 |   |   | 13.6  | 22.4  | 11.1  | 1.7 | 0.2 | 2.2 | 0.7 |
| 2946 | 169b11 | BP096865 | MXL066b01 |   |   | 10.4  | 10.5  | 7.7   | 1.3 | 0.6 | 2.2 | 1.4 |
| 2947 | 168a02 | BP096273 | MXL055g11 |   |   | 16.4  | 18.3  | 10.5  | 1.1 | 0.5 | 2.2 | 1.6 |
| 2948 | 167c03 | BP095956 | MXL050a07 |   |   | 30.2  | 47.8  | 26.0  | 1.7 | 1.0 | 2.2 | 1.6 |
| 2949 | 108a03 | AV387391 | CM014h02  |   |   | 9.3   | 25.2  | 12.8  | 2.5 | 0.5 | 2.2 | 1.8 |
| 2950 | 162c05 | BP093588 | MXL010e11 |   |   | 9.1   | 16.2  | 8.4   | 1.8 | 0.6 | 2.2 | 1.1 |
| 2951 | 159a01 | BP087718 | MX042b12  |   |   | 33.9  | 59.4  | 30.5  | 1.8 | 0.7 | 2.2 | 1.3 |
| 2952 | 135d04 | AV619926 | LC015b05  |   |   | 15.8  | 25.8  | 13.5  | 1.6 | 0.9 | 2.2 | 1.9 |
| 2953 | 169b03 | BP096835 | MXL065f05 |   |   | 21.2  | 15.0  | 12.3  | 0.8 | 0.4 | 2.2 | 1.8 |
| 2954 | 166a10 | BP095450 | MXL042a04 |   |   | 8.9   | 8.7   | 6.2   | 1.0 | 0.3 | 2.2 | 1.8 |
| 2955 | 014h11 | AV640566 | HCL018d10 |   |   | 0.7   | 1.0   | 0.8   | 1.3 | 0.3 | 2.2 | 2.1 |
| 2956 | 156a04 | AV631674 | LCL098a06 |   |   | 21.7  | 20.0  | 12.5  | 0.9 | 0.2 | 2.2 | 1.4 |
| 2957 | 157a11 | BP096577 | MX011h10  |   |   | 9.7   | 12.6  | 8.1   | 1.4 | 0.3 | 2.2 | 1.3 |
| 2958 | 165c11 | BP095162 | MXL036h05 |   |   | 9.8   | 10.9  | 8.2   | 1.3 | 0.7 | 2.2 | 1.8 |
| 2959 | 018f07 | AV619033 | LC002h01  |   |   | 109.3 | 102.7 | 47.2  | 0.9 | 0.1 | 2.2 | 0.6 |
| 2960 | 133e03 | AV645070 | HCL097g11 |   |   | 68.2  | 91.7  | 47.4  | 1.3 | 0.2 | 2.2 | 1.4 |
| 2961 | 164c01 | BP094670 | MXL028h05 |   |   | 25.0  | 37.1  | 18.8  | 1.5 | 0.2 | 2.2 | 0.7 |
| 2962 | 136g04 | AV620861 | LC027g09  |   |   | 3.4   | 15.2  | 7.4   | 4.5 | 1.9 | 2.2 | 1.0 |
| 2963 | 172b01 | BP098204 | MXL089c10 |   |   | 33.2  | 38.5  | 21.3  | 1.1 | 0.2 | 2.2 | 1.3 |
| 2964 | 167b07 | BP095915 | MXL049c08 |   |   | 8.0   | 12.6  | 6.9   | 1.7 | 0.7 | 2.2 | 1.2 |
| 2965 | 168c01 | BP096367 | MXL057f03 |   |   | 15.8  | 17.3  | 9.3   | 1.1 | 0.2 | 2.2 | 1.0 |
| 2966 | 154c12 | AV630912 | LCL086c01 |   |   | 112.0 | 95.9  | 45.0  | 0.9 | 0.3 | 2.2 | 0.3 |
| 2967 | 161a08 | BP098868 | MXL100e02 |   |   | 54.3  | 65.4  | 38.2  | 1.2 | 0.2 | 2.2 | 1.5 |
| 2968 | 142b09 | AV624976 | LC085c08  |   |   | 5.2   | 6.3   | 3.1   | 1.2 | 0.2 | 2.2 | 0.6 |
| 2969 | 105b09 | AV396247 | CL58h10   |   |   | 2.8   | 5.9   | 2.7   | 2.4 | 1.6 | 2.2 | 1.0 |
| 2970 | 169b04 | BP096839 | MXL065f11 |   |   | 8.2   | 9.7   | 6.1   | 1.5 | 1.0 | 2.2 | 1.5 |
| 2971 | 140f11 | AV624002 | LC071f02  |   |   | 15.8  | 35.7  | 17.0  | 2.7 | 1.1 | 2.2 | 0.4 |
| 2972 | 128e02 | AV642406 | HCL051c06 |   |   | 24.2  | 32.4  | 15.0  | 1.5 | 0.8 | 2.2 | 0.2 |
| 2973 | 171a10 | BP097715 | MXL080b11 |   |   | 8.6   | 8.6   | 5.7   | 1.0 | 0.2 | 2.2 | 1.5 |
| 2974 | 109a05 | AV387814 | CM023c01  |   |   | 61.5  | 73.0  | 34.4  | 1.2 | 0.1 | 2.2 | 0.3 |
| 2975 | 168b12 | BP096365 | MXL057e12 |   |   | 27.1  | 42.4  | 25.8  | 1.7 | 0.6 | 2.2 | 1.4 |
| 2976 | 103h01 | AV395454 | CL42f06   |   |   | 7.5   | 7.7   | 3.7   | 1.2 | 0.5 | 2.2 | 0.5 |
| 2977 | 004h01 | AV387382 | CM014e03  |   |   | 23.2  | 26.2  | 12.2  | 1.1 | 0.0 | 2.1 | 0.6 |
| 2978 | 155b03 | AV631295 | LCL091f02 |   |   | 6.6   | 7.0   | 4.0   | 1.1 | 0.5 | 2.1 | 0.9 |
| 2979 | 156b05 | AV631738 | LCL099a04 |   |   | 10.5  | 10.0  | 6.7   | 1.0 | 0.3 | 2.1 | 1.4 |
| 2980 | 142g03 | AV625390 | LC091h09  |   |   | 124.9 | 217.8 | 177.7 | 2.0 | 0.6 | 2.1 | 1.8 |
| 2981 | 027h12 | AV629532 | LCL060d09 |   |   | 1.1   | 1.5   | 1.4   | 2.6 | 3.2 | 2.1 | 2.6 |
| 2982 | 011f12 | AV635331 | HC045a06  |   |   | 19.4  | 14.8  | 6.9   | 0.8 | 0.3 | 2.1 | 0.6 |
| 2983 | 155c04 | AV631347 | LCL092d08 |   |   | 5.4   | 6.7   | 3.7   | 1.3 | 0.5 | 2.1 | 0.9 |
| 2984 | 164c04 | BP094679 | MXL027b06 |   |   | 19.4  | 30.2  | 18.6  | 1.5 | 0.8 | 2.1 | 1.8 |
| 2985 | 171b01 | BP097725 | MXL080c11 |   |   | 13.4  | 13.5  | 7.9   | 1.0 | 0.1 | 2.1 | 1.1 |
| 2986 | 167a11 | BP095878 | MXL048f08 |   |   | 10.7  | 9.3   | 7.3   | 1.1 | 0.6 | 2.1 | 1.6 |
| 2987 | 006c11 | AV389705 | CM039b05  |   |   | 3.7   | 5.2   | 2.9   | 1.4 | 0.3 | 2.1 | 0.9 |
| 2988 | 009d06 | AV391328 | CM090b04  |   |   | 6.5   | 9.5   | 4.6   | 1.5 | 0.2 | 2.1 | 0.7 |
| 2989 | 166b12 | BP095510 | MXL042h07 |   |   | 51.8  | 62.4  | 33.5  | 1.3 | 0.5 | 2.1 | 1.0 |
| 2990 | 139a09 | AV622777 | LC054d03  |   |   | 6.3   | 4.0   | 2.5   | 0.7 | 0.2 | 2.1 | 1.3 |
| 2991 | 132d02 | AV644665 | HCL091h07 |   |   | 78.2  | 78.5  | 39.1  | 1.1 | 0.2 | 2.1 | 0.6 |
| 2992 | 155a01 | AV631241 | LCL090g04 |   |   | 12.6  | 16.4  | 8.5   | 1.4 | 0.9 | 2.1 | 1.3 |



|      | A      | B        | C         | D | E | F      | G      | H     | I    | J    | K   | L   |
|------|--------|----------|-----------|---|---|--------|--------|-------|------|------|-----|-----|
| 2994 | 102a06 | BP098609 | MXL096c02 |   |   | 22.7   | 15.1   | 7.7   | 1.4  | 1.2  | 2.1 | 0.6 |
| 2995 | 026a12 | AV628071 | LCL036c07 |   |   | 4.9    | 4.8    | 2.6   | 1.0  | 0.2  | 2.1 | 0.9 |
| 2996 | 014a03 | AV639675 | HCL002h05 |   |   | 6.0    | 6.3    | 3.2   | 1.1  | 0.4  | 2.1 | 0.7 |
| 2997 | 166b11 | BP095506 | MXL042h03 |   |   | 17.2   | 20.7   | 13.2  | 1.3  | 0.3  | 2.1 | 1.2 |
| 2998 | 139c11 | AV623003 | LC05707   |   |   | 6.7    | 13.2   | 7.7   | 1.9  | 0.8  | 2.1 | 1.5 |
| 2999 | 164b11 | BP094665 | MXL026g07 |   |   | 46.2   | 49.6   | 29.4  | 1.1  | 0.1  | 2.1 | 1.1 |
| 3000 | 164a03 | BP094597 | MXL025d11 |   |   | 21.9   | 23.7   | 15.5  | 1.1  | 0.1  | 2.1 | 1.3 |
| 3001 | 160c02 | BP088464 | MX061b02  |   |   | 5.7    | 7.4    | 3.6   | 1.5  | 0.6  | 2.1 | 0.5 |
| 3002 | 159b01 | BP087736 | MX042e12  |   |   | 7.8    | 8.6    | 5.3   | 1.1  | 0.2  | 2.1 | 1.4 |
| 3003 | 162b09 | BP093534 | MXL009g06 |   |   | 35.7   | 40.0   | 22.8  | 1.1  | 0.2  | 2.1 | 1.1 |
| 3004 | 005h11 | AV388755 | CM032a05  |   |   | 87.2   | 69.1   | 43.7  | 0.8  | 0.3  | 2.1 | 1.6 |
| 3005 | 156b11 | AV631770 | LCL099e04 |   |   | 87.8   | 92.4   | 68.0  | 1.1  | 0.1  | 2.1 | 1.5 |
| 3006 | 136h02 | BP383789 | LC029b10  |   |   | 68.5   | 109.8  | 54.0  | 1.6  | 0.4  | 2.1 | 0.6 |
| 3007 | 164a08 | BP094620 | MXL025g11 |   |   | 5.0    | 5.8    | 3.5   | 1.2  | 0.2  | 2.1 | 1.2 |
| 3008 | 125b12 | AV640484 | HCL017a12 |   |   | 21.6   | 18.6   | 9.3   | 1.1  | 0.5  | 2.1 | 0.6 |
| 3009 | 134a10 | AV618977 | LC002b03  |   |   | 12.8   | 20.8   | 11.0  | 1.6  | 0.8  | 2.1 | 1.7 |
| 3010 | 148e03 | AV628048 | LCL035h11 |   |   | 7.1    | 39.0   | 17.4  | 5.5  | 4.5  | 2.1 | 0.8 |
| 3011 | 171a04 | BP097693 | MXL079g07 |   |   | 4.9    | 7.9    | 4.8   | 1.7  | 0.5  | 2.1 | 1.2 |
| 3012 | 168f02 | BP096598 | MXL061e09 |   |   | 43.5   | 81.1   | 40.1  | 1.8  | 0.5  | 2.1 | 1.0 |
| 3013 | 162a05 | BP093444 | MXL008e04 |   |   | 51.4   | 41.3   | 27.9  | 0.8  | 0.3  | 2.1 | 1.7 |
| 3014 | 027h02 | AV629451 | LCL059a03 |   |   | 12.1   | 12.1   | 6.0   | 1.0  | 0.1  | 2.1 | 0.6 |
| 3015 | 106e06 | AV386475 | CM001c03  |   |   | 12.3   | 19.1   | 12.1  | 2.0  | 1.3  | 2.1 | 1.3 |
| 3016 | 158b01 | BP087488 | MX035e11  |   |   | 50.6   | 35.3   | 18.2  | 0.7  | 0.2  | 2.1 | 0.7 |
| 3017 | 156a02 | AV631669 | LCL097h11 |   |   | 12.8   | 11.0   | 6.7   | 0.9  | 0.2  | 2.1 | 1.3 |
| 3018 | 139e12 | AV623221 | LC060f04  |   |   | 12.7   | 30.4   | 15.2  | 2.4  | 0.6  | 2.1 | 0.4 |
| 3019 | 169b06 | BP096850 | MXL065h06 |   |   | 8.9    | 12.0   | 5.9   | 1.4  | 0.2  | 2.1 | 0.3 |
| 3020 | 171c03 | BP097806 | MXL081f04 |   |   | 5.0    | 7.2    | 3.6   | 1.9  | 1.3  | 2.1 | 0.8 |
| 3021 | 026b10 | AV628153 | LCL037e08 |   |   | 43.6   | 30.7   | 15.0  | 0.8  | 0.3  | 2.1 | 0.5 |
| 3022 | 157c11 | BP086809 | MX017c05  |   |   | 97.4   | 152.8  | 96.8  | 1.6  | 0.2  | 2.1 | 1.3 |
| 3023 | 117e06 | AV632807 | HC012h01  |   |   | 8.8    | 10.4   | 5.2   | 1.2  | 0.2  | 2.1 | 0.5 |
| 3024 | 160c08 | BP088521 | MX062d09  |   |   | 14.7   | 25.2   | 11.9  | 1.7  | 0.3  | 2.1 | 0.7 |
| 3025 | 137e07 | BP383791 | LC039e02  |   |   | 5.1    | 324.0  | 166.6 | 64.8 | 29.4 | 2.1 | 0.3 |
| 3026 | 030c01 | AV631484 | LCL094g09 |   |   | 12.4   | 14.4   | 8.0   | 1.2  | 0.2  | 2.1 | 0.9 |
| 3027 | 169b12 | BP096871 | MXL066b09 |   |   | 1218.9 | 1493.5 | 914.4 | 1.2  | 0.1  | 2.1 | 1.1 |
| 3028 | 019d01 | AV619856 | LC013f01  |   |   | 37.5   | 83.7   | 47.7  | 2.2  | 0.4  | 2.1 | 1.1 |
| 3029 | 021a03 | AV621787 | LC040h12  |   |   | 26.5   | 33.0   | 16.6  | 1.2  | 0.1  | 2.1 | 0.5 |
| 3030 | 159a12 | BP087734 | MX042e08  |   |   | 14.7   | 13.2   | 10.5  | 0.9  | 0.1  | 2.1 | 1.5 |
| 3031 | 008g03 | AV389302 | CM075g11  |   |   | 8.8    | 18.7   | 9.5   | 2.3  | 1.1  | 2.1 | 0.9 |
| 3032 | 162a04 | BP093423 | MXL008b11 |   |   | 14.6   | 14.8   | 9.8   | 1.0  | 0.2  | 2.1 | 1.1 |
| 3033 | 031b06 | BP086570 | MX011g05  |   |   | 9.9    | 16.8   | 8.7   | 1.7  | 0.2  | 2.1 | 0.6 |
| 3034 | 166b01 | BP095456 | MXL042a12 |   |   | 26.3   | 21.8   | 14.1  | 0.8  | 0.2  | 2.1 | 1.3 |
| 3035 | 156a01 | AV631667 | LCL097h09 |   |   | 48.4   | 50.7   | 33.3  | 1.2  | 0.8  | 2.1 | 1.4 |
| 3036 | 120e05 | AV636091 | HC055a10  |   |   | 19.8   | 28.5   | 14.8  | 1.3  | 0.6  | 2.0 | 1.6 |
| 3037 | 136b01 | AV620461 | LC022e01  |   |   | 16.5   | 21.3   | 12.3  | 1.2  | 0.4  | 2.0 | 1.5 |
| 3038 | 004h08 | AV387425 | CM015h12  |   |   | 59.0   | 38.6   | 56.6  | 0.8  | 0.2  | 2.0 | 2.5 |
| 3039 | 146b03 | AV626997 | LCL019e08 |   |   | 14.3   | 17.2   | 9.0   | 1.2  | 0.2  | 2.0 | 0.7 |
| 3040 | 016h11 | AV642708 | HCL056d12 |   |   | 20.7   | 17.4   | 8.6   | 0.8  | 0.1  | 2.0 | 0.2 |
| 3041 | 157c04 | BP086738 | MX015f11  |   |   | 2.9    | 5.2    | 3.0   | 2.0  | 1.0  | 2.0 | 1.3 |
| 3042 | 155b11 | AV631322 | LCL092a03 |   |   | 4.2    | 5.4    | 3.5   | 1.5  | 0.9  | 2.0 | 1.4 |
| 3043 | 162b12 | BP093571 | MXL010d01 |   |   | 21.9   | 24.6   | 15.6  | 1.2  | 0.6  | 2.0 | 1.3 |
| 3044 | 010c06 | AV632508 | HC009b02  |   |   | 110.4  | 99.8   | 55.1  | 0.9  | 0.5  | 2.0 | 1.5 |
| 3045 | 162c10 | BP093660 | MXL011f04 |   |   | 21.9   | 20.4   | 12.6  | 0.9  | 0.2  | 2.0 | 1.6 |
| 3046 | 162c12 | BP093666 | MXL011f12 |   |   | 6.4    | 9.6    | 6.2   | 1.6  | 0.5  | 2.0 | 1.2 |
| 3047 | 019b10 | AV619644 | LC011b12  |   |   | 4.9    | 10.7   | 5.6   | 2.2  | 0.3  | 2.0 | 0.9 |
| 3048 | 151c12 | AV629425 | LCL058e10 |   |   | 8.7    | 10.2   | 5.0   | 1.2  | 0.1  | 2.0 | 0.2 |
| 3049 | 157c12 | BP086819 | MX017e11  |   |   | 4.7    | 17.4   | 8.5   | 3.5  | 1.4  | 2.0 | 0.2 |
| 3050 | 161b06 | BP092967 | MXL001e08 |   |   | 6.9    | 7.8    | 5.0   | 1.2  | 0.4  | 2.0 | 1.3 |
| 3051 | 005a06 | AV388169 | CM017e11  |   |   | 80.7   | 89.4   | 53.8  | 1.1  | 0.3  | 2.0 | 1.2 |
| 3052 | 165a05 | BP095022 | MXL034f01 |   |   | 21.1   | 16.7   | 11.3  | 0.8  | 0.2  | 2.0 | 1.3 |
| 3053 | 160c03 | BP088475 | MX061d05  |   |   | 17.0   | 21.5   | 13.6  | 1.4  | 0.5  | 2.0 | 1.2 |
| 3054 | 138f01 | AV622365 | LC048f09  |   |   | 10.0   | 11.4   | 5.8   | 1.2  | 0.5  | 2.0 | 0.6 |
| 3055 | 023e10 | AV625197 | LC089b08  |   |   | 10.0   | 14.6   | 7.4   | 1.5  | 0.2  | 2.0 | 0.4 |
| 3056 | 141a09 | AV624255 | LC075b09  |   |   | 8.2    | 8.9    | 4.9   | 1.3  | 0.8  | 2.0 | 1.0 |
| 3057 | 017h01 | AV643795 | HCL076c03 |   |   | 1.8    | 3.9    | 2.0   | 2.8  | 1.3  | 2.0 | 0.8 |
| 3058 | 138a02 | AV622015 | LC043h10  |   |   | 118.6  | 121.3  | 59.0  | 1.0  | 0.2  | 2.0 | 0.3 |
| 3059 | 139b04 | AV622855 | LC055f03  |   |   | 5.2    | 7.2    | 3.4   | 1.4  | 0.7  | 2.0 | 0.7 |
| 3060 | 133h03 | AV645242 | HCL100b04 |   |   | 9.0    | 15.2   | 7.7   | 1.8  | 0.5  | 2.0 | 0.6 |
| 3061 | 152f08 | AV630063 | LCL072d02 |   |   | 6.2    | 13.8   | 6.9   | 2.3  | 0.8  | 2.0 | 0.3 |
| 3062 | 161c11 | BP093069 | MXL002h11 |   |   | 8.0    | 8.1    | 5.7   | 1.1  | 0.4  | 2.0 | 1.2 |
| 3063 | 135c06 | AV619720 | LC014b03  |   |   | 100.1  | 170.0  | 94.4  | 1.9  | 0.7  | 2.0 | 0.8 |
| 3064 | 144e01 | AV626260 | LCL005d03 |   |   | 22.1   | 25.4   | 13.0  | 1.2  | 0.2  | 2.0 | 0.3 |
| 3065 | 016f04 | AV642368 | HCL050f06 |   |   | 6.6    | 10.9   | 5.9   | 1.7  | 0.5  | 2.0 | 0.7 |
| 3066 | 142g05 | AV625404 | LC092b01  |   |   | 4.2    | 9.9    | 5.6   | 2.5  | 1.3  | 2.0 | 1.3 |
| 3067 | 171b03 | BP097737 | MXL080e09 |   |   | 5.0    | 9.5    | 4.8   | 1.8  | 0.4  | 2.0 | 0.4 |
| 3068 | 169a02 | BP096766 | MXL064e10 |   |   | 11.1   | 9.5    | 5.8   | 0.9  | 0.2  | 2.0 | 1.1 |
| 3069 | 142b06 | BP383819 | LC085b09  |   |   | 102.8  | 102.2  | 55.9  | 1.0  | 0.1  | 2.0 | 1.0 |
| 3070 | 034g08 | BP096237 | MXL055a11 |   |   | 14.5   | 13.2   | 7.5   | 0.9  | 0.2  | 2.0 | 1.0 |
| 3071 | 152a09 | AV629782 | LCL066a11 |   |   | 4.1    | 18.3   | 9.5   | 4.5  | 1.2  | 2.0 | 0.4 |
| 3072 | 165c03 | BP095134 | MXL036d07 |   |   | 29.5   | 53.0   | 36.8  | 2.8  | 2.4  | 2.0 | 1.5 |
| 3073 | 026c03 | AV628209 | LCL038d11 |   |   | 18.4   | 41.3   | 21.2  | 2.3  | 0.5  | 2.0 | 0.3 |
| 3074 | 169b08 | BP096857 | MXL066a04 |   |   | 7.1    | 11.1   | 6.8   | 1.8  | 0.6  | 2.0 | 0.8 |
| 3075 | 161c01 | BP092998 | MXL002a03 |   |   | 5.9    | 7.4    | 4.1   | 1.4  | 0.4  | 2.0 | 0.6 |
| 3076 | 138c06 | AV622185 | LC046c08  |   |   | 5.6    | 14.8   | 7.4   | 2.7  | 1.2  | 2.0 | 0.1 |
| 3077 | 158b10 | BP087559 | MX037d09  |   |   | 7.5    | 9.8    | 6.9   | 1.3  | 0.4  | 2.0 | 1.4 |
| 3078 | 113g01 | AV387696 | CM070a10  |   |   | 4.3    | 7.4    | 4.3   | 1.7  | 0.3  | 2.0 | 0.9 |
| 3079 | 030g05 | BP086136 | MX002e12  |   |   | 79.1   | 85.3   | 50.3  | 1.1  | 0.1  | 2.0 | 1.2 |
| 3080 | 101d05 | AV393604 | CL06h04   |   |   | 5.6    | 7.5    | 3.4   | 1.2  | 0.4  | 2.0 | 0.6 |
| 3081 | 035f08 | BP097280 | MXL072h09 |   |   | 111.6  | 116.1  | 58.4  | 1.1  | 0.4  | 2.0 | 0.1 |
| 3082 | 157c10 | BP086806 | MX017b11  |   |   | 6.8    | 10.1   | 5.4   | 1.5  | 0.4  | 2.0 | 0.9 |
| 3083 | 006c04 | AV389549 | CM038c12  |   |   | 19.6   | 23.1   | 12.2  | 1.2  | 0.2  | 2.0 | 0.6 |
| 3084 | 001a01 | AV393333 | CL01b01   |   |   | 8.2    | 14.4   | 7.4   | 1.8  | 0.3  | 2.0 | 0.6 |
| 3085 | 019g01 | AV620222 | LC019c01  |   |   | 5.7    | 7.7    | 4.8   | 1.5  | 0.5  | 2.0 | 0.9 |
| 3086 | 111c11 | AV390412 | CM046a03  |   |   | 16.4   | 26.3   | 13.6  | 1.9  | 1.0  | 2.0 | 0.6 |
| 3087 | 136d12 | AV620711 | LC025g10  |   |   | 14.4   | 18.3   | 9.5   | 1.2  | 0.4  | 2.0 | 0.9 |
| 3088 | 031a01 | BP086334 | MX006g05  |   |   | 38.7   | 27.2   | 15.1  | 0.9  | 0.4  | 2.0 | 0.5 |
| 3089 | 003c01 | AV396237 | CL58a12   |   |   | 13.6   | 19.4   | 9.8   | 1.9  | 1.1  | 2.0 | 0.2 |
| 3090 | 017g03 | AV643605 | HCL072f06 |   |   | 5.2    | 10.4   | 5.6   | 2.1  | 0.8  | 2.0 | 0.7 |
| 3091 | 029a09 | AV630531 | LCL080c12 |   |   | 4.9    | 2.8    | 2.4   | 0.6  | 0.1  | 2.0 | 1.8 |
| 3092 | 160b09 | BP088417 | MX059h12  |   |   | 312.9  | 444.3  | 278.7 | 1.4  | 0.5  | 2.0 | 1.5 |
| 3093 | 113a09 | AV392699 | CM063c07  |   |   | 5.4    | 7.6    | 4.8   | 1.4  | 0.3  | 2.0 | 1.2 |
| 3094 | 161a09 | BP092930 | MXL001a02 |   |   | 5.5    | 7.0    | 4.3   | 1.5  | 0.9  | 2.0 | 1.2 |
| 3095 | 165b01 | BP095070 | MXL035c09 |   |   | 17.0   | 35.5   | 20.9  | 2.1  | 0.5  | 2.0 | 0.6 |
| 3096 | 027f01 | AV629282 | LCL055h01 |   |   | 8.0    | 8.4    | 7.1   | 1.1  | 0.4  | 2.0 | 1.6 |
| 3097 | 020f07 | AV621290 | LC033h10  |   |   | 11.9   | 17.5   | 8.7   | 1.5  | 0.6  | 2.0 | 0.6 |
| 3098 | 134b07 | AV619018 | LC002f09  |   |   | 13.7   | 45.7   | 23.2  | 31.3 | 9.0  | 2.0 | 0.1 |
| 3099 | 133e09 | AV645095 | HCL098b07 |   |   | 166.4  | 190.6  | 101.6 | 1.4  | 0.7  | 2.0 | 0.6 |

|      | A      | B        | C         | D | E | F     | G     | H     | I     | J     | K   | L   |
|------|--------|----------|-----------|---|---|-------|-------|-------|-------|-------|-----|-----|
| 3101 | 160c11 | BP088539 | MX062g11  |   |   | 18.2  | 47.8  | 27.0  | 2.6   | 0.2   | 2.0 | 1.0 |
| 3102 | 021d04 | AV622299 | LC047g11  |   |   | 20.1  | 46.3  | 24.3  | 2.3   | 0.4   | 2.0 | 0.3 |
| 3103 | 164b06 | BP094648 | MXL026d04 |   |   | 4.8   | 6.1   | 3.9   | 1.8   | 1.2   | 2.0 | 1.1 |
| 3104 | 034c07 | BP095558 | MXL043g12 |   |   | 6.4   | 5.8   | 3.3   | 1.0   | 0.6   | 2.0 | 1.2 |
| 3105 | 160b10 | BP088433 | MX060d08  |   |   | 22.1  | 32.3  | 22.0  | 1.6   | 0.7   | 2.0 | 1.3 |
| 3106 | 164a06 | BP094610 | MXL025f04 |   |   | 12.2  | 9.2   | 7.6   | 0.8   | 0.4   | 2.0 | 1.7 |
| 3107 | 156c10 | AV631837 | LCL100f03 |   |   | 12.7  | 17.4  | 10.2  | 1.3   | 0.3   | 2.0 | 1.3 |
| 3108 | 160a01 | BP088246 | MX055c05  |   |   | 58.9  | 51.5  | 43.3  | 0.9   | 0.6   | 1.9 | 1.9 |
| 3109 | 150d12 | AV629008 | LCL050c11 |   |   | 203.2 | 163.9 | 87.4  | 0.8   | 0.1   | 1.9 | 1.1 |
| 3110 | 143f09 | AV625885 | LC099d05  |   |   | 36.6  | 31.4  | 16.1  | 0.9   | 0.1   | 1.9 | 0.2 |
| 3111 | 013f09 | AV639195 | HC096b11  |   |   | 12.9  | 14.2  | 7.3   | 1.1   | 0.4   | 1.9 | 0.4 |
| 3112 | 147e07 | AV627579 | LCL028h10 |   |   | 13.9  | 37.8  | 20.9  | 2.8   | 0.6   | 1.9 | 0.5 |
| 3113 | 012b01 | AV636105 | HC055c01  |   |   | 9.5   | 47.8  | 25.4  | 5.3   | 1.5   | 1.9 | 0.5 |
| 3114 | 169b09 | BP096858 | MXL066a05 |   |   | 26.7  | 45.1  | 27.2  | 1.8   | 0.7   | 1.9 | 1.1 |
| 3115 | 121e04 | AV637189 | HC069h12  |   |   | 9.1   | 13.1  | 7.6   | 1.5   | 1.1   | 1.9 | 1.5 |
| 3116 | 143b08 | AV625611 | LC095d09  |   |   | 6.3   | 18.2  | 9.0   | 3.2   | 2.4   | 1.9 | 0.6 |
| 3117 | 114f05 | AV389131 | CM078g01  |   |   | 8.4   | 43.5  | 22.9  | 5.7   | 1.8   | 1.9 | 0.4 |
| 3118 | 155a05 | AV631253 | LCL090h12 |   |   | 10.1  | 7.8   | 5.1   | 0.8   | 0.1   | 1.9 | 1.0 |
| 3119 | 155c11 | AV631384 | LCL093a05 |   |   | 7.0   | 7.9   | 5.8   | 1.4   | 0.8   | 1.9 | 1.5 |
| 3120 | 111c04 | AV390350 | CM045d07  |   |   | 10.9  | 14.8  | 7.9   | 1.5   | 0.7   | 1.9 | 0.7 |
| 3121 | 163b03 | BP094084 | MXL017h10 |   |   | 8.2   | 9.0   | 6.2   | 1.1   | 0.2   | 1.9 | 1.2 |
| 3122 | 032e02 | BP093346 | MXL007b10 |   |   | 42.5  | 86.6  | 50.6  | 2.0   | 0.4   | 1.9 | 1.0 |
| 3123 | 138b07 | AV622113 | LC045c07  |   |   | 175.7 | 174.8 | 108.1 | 1.0   | 0.0   | 1.9 | 1.3 |
| 3124 | 120a11 | AV635703 | HC049g08  |   |   | 11.3  | 11.2  | 5.8   | 1.0   | 0.1   | 1.9 | 0.4 |
| 3125 | 115g12 | AV391604 | CM092c09  |   |   | 2.6   | 2.5   | 1.8   | 1.0   | 0.1   | 1.9 | 1.5 |
| 3126 | 162b04 | BP093511 | MXL009d08 |   |   | 10.7  | 10.7  | 7.2   | 1.0   | 0.1   | 1.9 | 1.0 |
| 3127 | 141b07 | AV624330 | LC076c03  |   |   | 105.2 | 106.6 | 57.2  | 1.0   | 0.2   | 1.9 | 0.7 |
| 3128 | 170a01 | BP097193 | MXL071e10 |   |   | 80.2  | 86.1  | 51.5  | 1.1   | 0.2   | 1.9 | 1.0 |
| 3129 | 167b04 | BP095903 | MXL049a09 |   |   | 19.1  | 17.1  | 13.7  | 0.9   | 0.1   | 1.9 | 1.2 |
| 3130 | 018d12 | AV644553 | HCL090d11 |   |   | 0.3   | 0.4   | 0.3   | 337.3 | 672.7 | 1.9 | 0.9 |
| 3131 | 026c01 | AV628173 | LCL037g10 |   |   | 8.5   | 7.1   | 6.3   | 0.8   | 0.1   | 1.9 | 1.6 |
| 3132 | 103g08 | AV395497 | CL42b08   |   |   | 5.5   | 8.1   | 4.6   | 1.4   | 0.2   | 1.9 | 1.1 |
| 3133 | 171a03 | BP097683 | MXL079f05 |   |   | 13.8  | 13.6  | 9.3   | 1.0   | 0.3   | 1.9 | 1.2 |
| 3134 | 166c05 | BP095539 | MXL043e04 |   |   | 7.5   | 14.0  | 8.0   | 1.8   | 0.3   | 1.9 | 1.1 |
| 3135 | 140a05 | AV623546 | LC065e01  |   |   | 7.5   | 9.7   | 5.1   | 1.5   | 0.6   | 1.9 | 0.2 |
| 3136 | 132h04 | AV644853 | HCL094f10 |   |   | 26.7  | 35.6  | 18.7  | 1.3   | 0.2   | 1.9 | 0.1 |
| 3137 | 023b02 | AV624638 | LC080e07  |   |   | 22.0  | 24.6  | 13.0  | 1.1   | 0.1   | 1.9 | 0.2 |
| 3138 | 012e01 | AV636917 | HC066a08  |   |   | 26.2  | 41.7  | 22.4  | 1.6   | 0.2   | 1.9 | 0.4 |
| 3139 | 156h03 | BP086393 | MX007h03  |   |   | 4.3   | 5.3   | 5.4   | 1.2   | 0.4   | 1.9 | 2.1 |
| 3140 | 120f03 | AV636231 | HC056g08  |   |   | 6.3   | 12.9  | 7.0   | 2.1   | 0.9   | 1.9 | 0.6 |
| 3141 | 156d12 | BP086117 | MX002c01  |   |   | 42.5  | 37.4  | 20.2  | 1.0   | 0.3   | 1.9 | 0.8 |
| 3142 | 158a10 | BP087442 | MX034f09  |   |   | 30.0  | 15.0  | 10.5  | 0.6   | 0.3   | 1.9 | 1.1 |
| 3143 | 029g07 | AV631083 | LCL088e05 |   |   | 12.2  | 12.3  | 8.7   | 1.0   | 0.2   | 1.9 | 1.4 |
| 3144 | 124c10 | AV640098 | HCL010d04 |   |   | 26.6  | 19.9  | 11.4  | 0.7   | 0.2   | 1.9 | 1.0 |
| 3145 | 028c01 | AV629763 | LCL065e07 |   |   | 4.8   | 5.0   | 2.7   | 1.1   | 0.3   | 1.9 | 0.5 |
| 3146 | 144e06 | AV626273 | LCL005f04 |   |   | 32.9  | 42.6  | 23.9  | 1.3   | 0.1   | 1.9 | 0.7 |
| 3147 | 006c02 | AV389512 | CM037f11  |   |   | 14.9  | 19.5  | 10.4  | 1.4   | 0.3   | 1.9 | 0.4 |
| 3148 | 005h02 | AV388574 | CM030b12  |   |   | 10.1  | 14.4  | 8.6   | 1.5   | 0.6   | 1.9 | 1.0 |
| 3149 | 158c05 | BP087593 | MX038c10  |   |   | 10.1  | 16.0  | 10.2  | 1.9   | 1.1   | 1.9 | 0.9 |
| 3150 | 172c02 | BP098289 | MXL090h06 |   |   | 12.0  | 28.8  | 15.3  | 2.4   | 0.4   | 1.9 | 0.2 |
| 3151 | 023e01 | AV625140 | LC088d07  |   |   | 9.5   | 10.8  | 6.2   | 1.1   | 0.1   | 1.9 | 0.7 |
| 3152 | 137e05 | AV621665 | LC039c11  |   |   | 5.1   | 8.3   | 4.4   | 1.7   | 0.2   | 1.9 | 0.1 |
| 3153 | 138b03 | AV622095 | LC044h12  |   |   | 230.2 | 241.9 | 124.4 | 1.0   | 0.2   | 1.9 | 0.5 |
| 3154 | 165e03 | BP095211 | MXL038b05 |   |   | 12.1  | 21.6  | 11.5  | 1.8   | 0.6   | 1.9 | 0.4 |
| 3155 | 006g11 | AV390527 | CM046g12  |   |   | 28.6  | 28.2  | 15.2  | 1.1   | 0.4   | 1.9 | 0.3 |
| 3156 | 121c04 | AV636962 | HC066g03  |   |   | 9.7   | 15.2  | 7.9   | 1.5   | 0.7   | 1.9 | 1.1 |
| 3157 | 117c05 | AV632413 | HC007h09  |   |   | 9.0   | 11.2  | 6.0   | 1.3   | 0.6   | 1.9 | 0.8 |
| 3158 | 001f03 | AV394105 | CL17g01   |   |   | 1.5   | 1.9   | 1.1   | 1.3   | 0.5   | 1.9 | 0.6 |
| 3159 | 160b12 | BP088446 | MX060g02  |   |   | 8.4   | 10.0  | 7.4   | 1.2   | 0.3   | 1.9 | 1.3 |
| 3160 | 015a09 | AV640706 | HCL021a06 |   |   | 31.6  | 47.3  | 25.3  | 1.6   | 0.4   | 1.9 | 0.3 |
| 3161 | 162b01 | BP093501 | MXL009c07 |   |   | 4.3   | 5.3   | 3.2   | 1.3   | 0.4   | 1.9 | 0.8 |
| 3162 | 165b03 | BP095075 | MXL035d05 |   |   | 29.6  | 30.1  | 21.6  | 1.0   | 0.3   | 1.9 | 1.3 |
| 3163 | 159b07 | BP087744 | MX042g02  |   |   | 50.8  | 79.8  | 48.2  | 1.6   | 0.1   | 1.9 | 0.6 |
| 3164 | 161c12 | BP093081 | MXL003b04 |   |   | 78.7  | 112.4 | 76.2  | 1.5   | 0.2   | 1.9 | 1.0 |
| 3165 | 171b05 | BP097751 | MXL080g02 |   |   | 6.2   | 5.7   | 3.9   | 1.2   | 0.6   | 1.9 | 1.0 |
| 3166 | 102c07 | AV394299 | CL20f02   |   |   | 12.9  | 22.6  | 12.7  | 1.8   | 0.2   | 1.9 | 0.6 |
| 3167 | 169b05 | BP096845 | MXL065g09 |   |   | 3.9   | 4.3   | 3.0   | 1.4   | 0.8   | 1.9 | 1.1 |
| 3168 | 163d05 | BP094250 | MXL020b03 |   |   | 9.9   | 18.5  | 9.8   | 1.9   | 0.7   | 1.9 | 0.4 |
| 3169 | 024a08 | AV626293 | LCL006a04 |   |   | 9.7   | 12.4  | 6.6   | 1.3   | 0.2   | 1.9 | 0.2 |
| 3170 | 165b09 | BP095110 | MXL036a01 |   |   | 31.7  | 24.7  | 18.3  | 0.8   | 0.4   | 1.9 | 1.6 |
| 3171 | 138e08 | AV622329 | LC048c04  |   |   | 6.4   | 20.8  | 12.2  | 4.0   | 2.7   | 1.9 | 0.6 |
| 3172 | 125c10 | AV640536 | HCL018a01 |   |   | 5.8   | 7.1   | 4.2   | 1.2   | 0.7   | 1.9 | 1.3 |
| 3173 | 155a06 | AV631254 | LCL091a01 |   |   | 4.8   | 6.2   | 4.2   | 1.4   | 0.6   | 1.9 | 1.1 |
| 3174 | 145b08 | AV626545 | LCL010h12 |   |   | 10.3  | 29.0  | 16.0  | 2.8   | 0.5   | 1.9 | 0.2 |
| 3175 | 154e06 | AV630992 | LCL087d01 |   |   | 77.0  | 73.6  | 41.9  | 1.0   | 0.1   | 1.9 | 0.9 |
| 3176 | 145b05 | AV626535 | LCL010g09 |   |   | 50.7  | 70.0  | 41.4  | 1.4   | 0.1   | 1.9 | 0.9 |
| 3177 | 136h12 | AV621093 | LC031b04  |   |   | 24.2  | 41.0  | 21.9  | 1.7   | 0.3   | 1.9 | 0.4 |
| 3178 | 155c06 | AV631352 | LCL092e01 |   |   | 6.0   | 9.1   | 5.0   | 1.7   | 0.7   | 1.9 | 0.4 |
| 3179 | 116h05 | AV631988 | HC002e10  |   |   | 12.9  | 19.5  | 11.6  | 1.9   | 1.3   | 1.9 | 1.0 |
| 3180 | 002e03 | AV395397 | CL41h11   |   |   | 16.1  | 29.7  | 19.3  | 2.1   | 1.0   | 1.9 | 1.1 |
| 3181 | 139d05 | AV623043 | LC058b08  |   |   | 2.6   | 11.9  | 6.2   | 4.4   | 3.1   | 1.9 | 1.3 |
| 3182 | 140e03 | AV623854 | LC069j01  |   |   | 12.0  | 28.5  | 17.2  | 2.4   | 0.2   | 1.9 | 0.6 |
| 3183 | 119b01 | AV634583 | HC035c03  |   |   | 10.6  | 12.0  | 6.9   | 1.2   | 0.3   | 1.9 | 0.4 |
| 3184 | 025c01 | AV627193 | LCL022e03 |   |   | 7.6   | 6.6   | 4.7   | 0.9   | 0.1   | 1.9 | 1.3 |
| 3185 | 032a09 | BP087710 | MX042a01  |   |   | 63.9  | 40.4  | 21.8  | 0.7   | 0.3   | 1.9 | 0.1 |
| 3186 | 156e08 | BP086191 | MX003f10  |   |   | 121.8 | 173.3 | 100.8 | 1.3   | 0.3   | 1.9 | 1.2 |
| 3187 | 010f03 | AV633136 | HC017b11  |   |   | 5.2   | 9.5   | 5.3   | 2.0   | 0.7   | 1.9 | 0.7 |
| 3188 | 171a05 | BP097694 | MXL079g09 |   |   | 14.6  | 19.8  | 13.6  | 1.4   | 0.3   | 1.9 | 1.1 |
| 3189 | 106d12 | AV397348 | CL80f11   |   |   | 6.0   | 8.3   | 4.5   | 1.4   | 0.2   | 1.9 | 0.1 |
| 3190 | 161b10 | BP092978 | MXL001f12 |   |   | 7.5   | 9.7   | 7.1   | 1.4   | 0.5   | 1.9 | 1.1 |
| 3191 | 022c07 | AV623612 | LC066c08  |   |   | 26.4  | 43.5  | 23.4  | 1.7   | 0.5   | 1.9 | 0.2 |
| 3192 | 155c09 | AV631372 | LCL092g12 |   |   | 18.9  | 32.9  | 18.2  | 1.8   | 0.6   | 1.9 | 0.6 |
| 3193 | 011h03 | AV635667 | HC049c10  |   |   | 107.6 | 130.7 | 78.0  | 1.2   | 0.3   | 1.8 | 0.8 |
| 3194 | 137g01 | AV621820 | LC041d05  |   |   | 16.3  | 30.1  | 18.0  | 1.8   | 0.1   | 1.8 | 0.5 |
| 3195 | 140c06 | AV623720 | LC067g02  |   |   | 8.5   | 19.8  | 10.8  | 2.4   | 0.5   | 1.8 | 0.2 |
| 3196 | 169c03 | BP096877 | MXL066c07 |   |   | 11.0  | 18.0  | 10.0  | 1.8   | 0.9   | 1.8 | 0.7 |
| 3197 | 109h03 | AV388597 | CM030e04  |   |   | 6.2   | 7.5   | 4.1   | 1.3   | 0.6   | 1.8 | 0.5 |
| 3198 | 134d12 | AV619296 | LC006c07  |   |   | 47.3  | 49.1  | 31.6  | 1.0   | 0.4   | 1.8 | 1.3 |
| 3199 | 103e02 | AV395229 | CL37a10   |   |   | 5.1   | 5.5   | 3.0   | 1.1   | 0.2   | 1.8 | 0.6 |
| 3200 | 101g08 | BP098606 | MXL096b10 |   |   | 3.2   | 3.9   | 3.0   | 1.2   | 0.2   | 1.8 | 1.3 |
| 3201 | 002c02 | AV394910 | CL34h05   |   |   | 5.9   | 7.8   | 4.5   | 1.3   | 0.4   | 1.8 | 0.9 |
| 3202 | 108d05 | AV387219 | CM018c11  |   |   | 6.7   | 10.5  | 5.6   | 1.5   | 0.3   | 1.8 | 0.4 |
| 3203 | 141c06 | AV624374 | LC076h07  |   |   | 65.7  | 69.0  | 41.9  | 1.0   | 0.2   | 1.8 | 1.0 |
| 3204 | 010a03 | AV632083 | HC003f11  |   |   | 14.8  | 26.8  | 14.6  | 1.8   | 0.5   | 1.8 | 0.5 |
| 3205 | 017h06 | AV643923 | HCL078e04 |   |   | 0.7   | 0.9   | 0.5   | 1.3   | 0.4   | 1.8 | 0.7 |
| 3206 | 104b11 | AV397782 | CL45f01   |   |   | 7.3   | 8.0   | 4.4   | 1.1   | 0.2   | 1.8 | 0.7 |
| 3207 | 1      |          |           |   |   |       |       |       |       |       |     |     |

|      | A      | B        | C         | D | E | F     | G     | H     | I    | J    | K   | L   |
|------|--------|----------|-----------|---|---|-------|-------|-------|------|------|-----|-----|
| 3208 | 167c12 | BP095987 | MXL050f04 |   |   | 8.9   | 11.8  | 8.3   | 1.5  | 0.8  | 1.8 | 1.1 |
| 3209 | 133b10 | AV644985 | HCL096e08 |   |   | 93.0  | 97.3  | 60.8  | 1.1  | 0.2  | 1.8 | 1.1 |
| 3210 | 015h04 | AV641485 | HCL034e05 |   |   | 15.2  | 30.7  | 17.6  | 2.1  | 0.6  | 1.8 | 0.7 |
| 3211 | 112b11 | AV391563 | CM055b12  |   |   | 2.2   | 3.0   | 1.9   | 1.5  | 0.5  | 1.8 | 0.7 |
| 3212 | 154a01 | AV630742 | LCL083f03 |   |   | 239.0 | 244.1 | 147.1 | 1.0  | 0.1  | 1.8 | 1.1 |
| 3213 | 138d03 | BP383796 | LC046g08  |   |   | 11.6  | 21.1  | 11.2  | 1.8  | 0.5  | 1.8 | 0.5 |
| 3214 | 144g11 | AV626404 | LCL008e10 |   |   | 11.6  | 494.5 | 286.5 | 41.6 | 6.0  | 1.8 | 0.3 |
| 3215 | 119f12 | BP098669 | MXL097b09 |   |   | 5.9   | 6.4   | 3.5   | 1.1  | 0.1  | 1.8 | 0.2 |
| 3216 | 007g06 | AV392270 | CM060c01  |   |   | 17.6  | 21.2  | 11.7  | 1.2  | 0.2  | 1.8 | 0.5 |
| 3217 | 154a08 | AV630773 | LCL084b03 |   |   | 19.1  | 16.3  | 9.0   | 0.9  | 0.3  | 1.8 | 0.5 |
| 3218 | 107g11 | AV387049 | CM013b05  |   |   | 16.1  | 20.2  | 11.4  | 1.3  | 0.3  | 1.8 | 0.4 |
| 3219 | 105e12 | AV396752 | CL66a08   |   |   | 4.7   | 5.0   | 2.9   | 1.1  | 0.3  | 1.8 | 0.6 |
| 3220 | 166c01 | BP095513 | MXL043a02 |   |   | 135.7 | 110.8 | 74.5  | 0.8  | 0.3  | 1.8 | 1.2 |
| 3221 | 157a04 | BP086470 | MX009e08  |   |   | 5.8   | 7.0   | 4.8   | 1.3  | 0.5  | 1.8 | 1.2 |
| 3222 | 020f02 | AV621238 | LC033c04  |   |   | 20.7  | 50.1  | 30.1  | 2.5  | 0.8  | 1.8 | 0.6 |
| 3223 | 147e11 | AV627596 | LCL029b11 |   |   | 14.7  | 380.2 | 214.5 | 26.3 | 12.7 | 1.8 | 0.1 |
| 3224 | 165b04 | BP095076 | MXL035d06 |   |   | 36.2  | 35.5  | 22.7  | 1.0  | 0.3  | 1.8 | 1.2 |
| 3225 | 132h12 | AV644872 | HCL094h08 |   |   | 8.0   | 9.4   | 5.3   | 1.2  | 0.1  | 1.8 | 0.5 |
| 3226 | 033c01 | BP094206 | MXL019e10 |   |   | 6.7   | 6.0   | 4.2   | 0.9  | 0.1  | 1.8 | 1.1 |
| 3227 | 139c03 | AV622916 | LC056e05  |   |   | 5.3   | 5.3   | 2.9   | 1.1  | 0.5  | 1.8 | 0.4 |
| 3228 | 153d10 | AV630484 | LCL079f02 |   |   | 6.9   | 9.0   | 5.0   | 1.2  | 0.7  | 1.8 | 1.2 |
| 3229 | 025g12 | AV627879 | LCL033c05 |   |   | 4.2   | 38.7  | 21.0  | 9.3  | 3.5  | 1.8 | 0.3 |
| 3230 | 107e12 | AV386956 | CM010h10  |   |   | 12.6  | 10.0  | 5.8   | 0.8  | 0.2  | 1.8 | 0.4 |
| 3231 | 004e11 | AV386982 | CM010c11  |   |   | 8.5   | 14.2  | 12.4  | 1.6  | 1.1  | 1.8 | 1.7 |
| 3232 | 107a09 | AV387213 | CM006h09  |   |   | 4.7   | 7.4   | 4.3   | 1.6  | 0.1  | 1.8 | 0.4 |
| 3233 | 138f11 | AV622511 | LC050f05  |   |   | 14.9  | 36.3  | 19.8  | 2.6  | 1.4  | 1.8 | 0.5 |
| 3234 | 164c11 | BP094719 | MXL028b06 |   |   | 14.3  | 16.9  | 10.3  | 1.2  | 0.3  | 1.8 | 0.9 |
| 3235 | 116b09 | AV392467 | CM097c02  |   |   | 79.7  | 94.9  | 58.9  | 1.2  | 0.2  | 1.8 | 0.5 |
| 3236 | 165b12 | BP095121 | MXL036b10 |   |   | 16.5  | 19.6  | 13.4  | 1.4  | 0.6  | 1.8 | 1.0 |
| 3237 | 028h05 | AV630349 | LCL077f08 |   |   | 3.2   | 14.6  | 7.7   | 4.3  | 1.8  | 1.8 | 0.9 |
| 3238 | 102c05 | AV394280 | CL20e03   |   |   | 6.8   | 8.1   | 4.6   | 1.2  | 0.1  | 1.8 | 0.3 |
| 3239 | 009c09 | AV390833 | CM087h11  |   |   | 57.6  | 47.2  | 27.4  | 0.9  | 0.2  | 1.8 | 0.4 |
| 3240 | 005g03 | AV388056 | CM028e07  |   |   | 11.4  | 11.6  | 6.8   | 1.1  | 0.4  | 1.8 | 0.5 |
| 3241 | 112d02 | AV391772 | CM056a12  |   |   | 11.1  | 26.0  | 14.7  | 2.4  | 0.4  | 1.8 | 0.2 |
| 3242 | 003e03 | AV396602 | CL65d11   |   |   | 1.0   | 2.0   | 1.2   | 2.5  | 1.5  | 1.8 | 0.7 |
| 3243 | 156c11 | AV631840 | LCL100f08 |   |   | 6.8   | 8.4   | 5.9   | 1.5  | 0.7  | 1.8 | 1.0 |
| 3244 | 117a01 | AV632053 | HC003c10  |   |   | 12.6  | 14.1  | 8.4   | 1.3  | 0.9  | 1.8 | 0.9 |
| 3245 | 015c01 | AV640841 | HCL023c06 |   |   | 3.0   | 4.3   | 2.6   | 1.4  | 0.3  | 1.8 | 0.9 |
| 3246 | 101c04 | AV393423 | CL03f10   |   |   | 6.5   | 11.5  | 7.2   | 1.8  | 0.5  | 1.8 | 1.0 |
| 3247 | 036f02 | BP098436 | MXL093c07 |   |   | 9.0   | 6.9   | 5.1   | 0.8  | 0.2  | 1.8 | 1.3 |
| 3248 | 020c02 | AV620842 | LC027e12  |   |   | 7.8   | 31.6  | 17.7  | 4.2  | 1.1  | 1.8 | 0.4 |
| 3249 | 116d05 | AV393018 | CM099a04  |   |   | 15.4  | 13.2  | 7.6   | 0.9  | 0.3  | 1.8 | 0.7 |
| 3250 | 140d01 | AV623774 | LC068e01  |   |   | 15.2  | 9.7   | 5.5   | 0.7  | 0.1  | 1.8 | 1.0 |
| 3251 | 103d11 | AV395117 | CL36f02   |   |   | 3.3   | 4.4   | 2.4   | 1.3  | 0.4  | 1.8 | 0.6 |
| 3252 | 036h03 | BP098808 | MXL099d10 |   |   | 6.6   | 10.2  | 6.1   | 1.5  | 0.3  | 1.8 | 0.9 |
| 3253 | 167c01 | BP095947 | MXL049h06 |   |   | 28.4  | 51.3  | 29.8  | 2.0  | 0.5  | 1.8 | 0.2 |
| 3254 | 001h02 | AV394441 | CL24g12   |   |   | 3.9   | 6.3   | 4.0   | 1.7  | 0.5  | 1.8 | 0.9 |
| 3255 | 009e01 | AV391601 | CM092a12  |   |   | 8.5   | 14.7  | 8.0   | 1.7  | 0.2  | 1.8 | 0.6 |
| 3256 | 028f01 | AV630141 | LCL074a05 |   |   | 6.2   | 7.4   | 4.2   | 1.2  | 0.3  | 1.8 | 0.4 |
| 3257 | 158b09 | BP087552 | MX037b12  |   |   | 138.7 | 87.6  | 66.3  | 0.6  | 0.1  | 1.8 | 1.5 |
| 3258 | 149d03 | AV628469 | LCL042d04 |   |   | 134.4 | 142.3 | 91.4  | 1.0  | 0.1  | 1.8 | 1.1 |
| 3259 | 131b03 | AV643872 | HCL077e04 |   |   | 15.3  | 21.4  | 13.4  | 1.4  | 0.2  | 1.8 | 0.8 |
| 3260 | 131h12 | AV644389 | HCL087f09 |   |   | 15.9  | 22.6  | 13.3  | 1.4  | 0.3  | 1.8 | 0.6 |
| 3261 | 132f02 | AV644747 | HCL093c03 |   |   | 7.5   | 12.3  | 6.8   | 1.6  | 0.3  | 1.8 | 0.2 |
| 3262 | 139e10 | AV623173 | LC059h11  |   |   | 16.3  | 20.1  | 11.7  | 1.2  | 0.1  | 1.8 | 0.4 |
| 3263 | 029c02 | AV630703 | LCL082h12 |   |   | 23.5  | 35.6  | 20.5  | 1.5  | 0.2  | 1.8 | 0.7 |
| 3264 | 003c12 | AV397905 | CL59f01   |   |   | 40.5  | 29.5  | 18.2  | 0.7  | 0.1  | 1.8 | 0.9 |
| 3265 | 155a02 | AV631243 | LCL090g07 |   |   | 48.7  | 32.6  | 26.7  | 0.6  | 0.2  | 1.8 | 1.5 |
| 3266 | 163a05 | BP094031 | MXL017b12 |   |   | 28.3  | 27.9  | 18.5  | 1.0  | 0.3  | 1.8 | 1.1 |
| 3267 | 137e02 | AV621604 | LC038d02  |   |   | 103.0 | 99.4  | 54.8  | 1.0  | 0.3  | 1.8 | 0.5 |
| 3268 | 111d04 | AV390505 | CM046g05  |   |   | 30.9  | 37.9  | 21.2  | 1.5  | 0.8  | 1.8 | 0.2 |
| 3269 | 018g02 | AV619048 | LC003a10  |   |   | 7.1   | 13.6  | 9.3   | 2.1  | 0.6  | 1.8 | 1.2 |
| 3270 | 143a05 | AV625541 | LC094d01  |   |   | 5.5   | 5.8   | 3.9   | 1.1  | 0.2  | 1.8 | 0.8 |
| 3271 | 158b05 | BP087521 | MX036d01  |   |   | 5.7   | 6.6   | 4.2   | 1.1  | 0.2  | 1.8 | 0.5 |
| 3272 | 023a01 | AV624500 | LC078e11  |   |   | 18.0  | 44.7  | 28.5  | 3.3  | 2.2  | 1.8 | 0.9 |
| 3273 | 015a03 | AV640623 | HCL019d06 |   |   | 49.0  | 61.0  | 34.3  | 1.3  | 0.1  | 1.8 | 0.7 |
| 3274 | 133b08 | BP383769 | HCL096d10 |   |   | 15.1  | 28.1  | 16.4  | 1.9  | 0.4  | 1.8 | 0.6 |
| 3275 | 132g01 | AV644807 | HCL094b01 |   |   | 66.2  | 78.0  | 47.2  | 1.3  | 0.2  | 1.8 | 0.9 |
| 3276 | 112e06 | AV391933 | CM057g01  |   |   | 7.4   | 9.3   | 5.4   | 1.3  | 0.2  | 1.8 | 0.4 |
| 3277 | 028g07 | AV630270 | LCL076d07 |   |   | 14.3  | 18.5  | 10.1  | 1.4  | 0.8  | 1.8 | 0.4 |
| 3278 | 171a02 | BP097677 | MXL079e02 |   |   | 73.9  | 89.8  | 62.6  | 1.2  | 0.4  | 1.8 | 1.1 |
| 3279 | 036f03 | BP098462 | MXL093f10 |   |   | 56.0  | 62.4  | 49.3  | 1.6  | 1.3  | 1.8 | 1.0 |
| 3280 | 137e11 | AV621710 | LC040a03  |   |   | 21.7  | 33.4  | 19.2  | 1.5  | 0.1  | 1.8 | 0.3 |
| 3281 | 024d02 | AV626512 | LCL010d05 |   |   | 4.9   | 8.4   | 5.5   | 1.8  | 0.4  | 1.8 | 0.9 |
| 3282 | 163b05 | BP094094 | MXL018a10 |   |   | 8.4   | 10.8  | 7.8   | 1.4  | 0.3  | 1.8 | 0.8 |
| 3283 | 116b05 | AV392392 | CM096e10  |   |   | 6.5   | 5.2   | 3.0   | 0.8  | 0.3  | 1.8 | 0.5 |
| 3284 | 006d02 | AV389743 | CM039e10  |   |   | 24.0  | 31.6  | 17.9  | 1.3  | 0.2  | 1.8 | 0.2 |
| 3285 | 155a04 | AV631248 | LCL090h05 |   |   | 23.1  | 20.5  | 15.7  | 0.9  | 0.2  | 1.8 | 1.1 |
| 3286 | 007e03 | AV391813 | CM056e02  |   |   | 71.0  | 78.4  | 44.9  | 1.1  | 0.3  | 1.8 | 0.2 |
| 3287 | 164a01 | BP094585 | MXL025c08 |   |   | 7.7   | 9.4   | 6.3   | 1.3  | 0.5  | 1.8 | 0.9 |
| 3288 | 011a02 | AV633897 | HC026f07  |   |   | 15.1  | 18.9  | 11.3  | 1.4  | 0.4  | 1.8 | 0.5 |
| 3289 | 163b08 | BP094111 | MXL018c11 |   |   | 7.3   | 11.3  | 6.9   | 1.7  | 0.9  | 1.8 | 0.7 |
| 3290 | 031c06 | BP086672 | MX014b04  |   |   | 9.8   | 10.3  | 5.9   | 1.0  | 0.3  | 1.8 | 0.6 |
| 3291 | 160b07 | BP088384 | MX059a12  |   |   | 3.7   | 5.7   | 3.5   | 1.6  | 0.3  | 1.8 | 0.4 |
| 3292 | 101a07 | AV393318 | CL01d06   |   |   | 146.9 | 148.5 | 85.9  | 1.0  | 0.1  | 1.8 | 0.2 |
| 3293 | 107g03 | AV387163 | CM012c03  |   |   | 4.5   | 7.3   | 4.2   | 1.6  | 0.7  | 1.8 | 1.0 |
| 3294 | 172b11 | BP098280 | MXL090g05 |   |   | 5.6   | 8.0   | 6.3   | 1.7  | 0.9  | 1.8 | 1.2 |
| 3295 | 162b07 | BP093521 | MXL009f01 |   |   | 8.2   | 13.2  | 8.6   | 1.6  | 0.2  | 1.8 | 0.9 |
| 3296 | 152d03 | AV629939 | LCL069d12 |   |   | 8.6   | 13.5  | 9.2   | 1.7  | 0.7  | 1.8 | 0.7 |
| 3297 | 127b01 | AV641632 | HCL037g12 |   |   | 64.3  | 60.6  | 40.2  | 1.0  | 0.2  | 1.8 | 0.8 |
| 3298 | 133e05 | AV645076 | HCL097h08 |   |   | 13.4  | 15.5  | 9.1   | 1.1  | 0.6  | 1.8 | 1.1 |
| 3299 | 021h01 | AV622945 | LC056h06  |   |   | 5.8   | 11.0  | 7.2   | 2.1  | 1.2  | 1.8 | 1.2 |
| 3300 | 139a07 | AV622990 | LC057e04  |   |   | 10.9  | 9.8   | 6.2   | 0.9  | 0.2  | 1.8 | 0.7 |
| 3301 | 155b09 | AV631318 | LCL091h11 |   |   | 17.4  | 13.1  | 9.0   | 0.8  | 0.2  | 1.8 | 1.0 |
| 3302 | 101g03 | AV393916 | CL13g11   |   |   | 7.5   | 8.5   | 5.2   | 1.2  | 0.4  | 1.8 | 0.5 |
| 3303 | 164c06 | BP094685 | MXL027d09 |   |   | 81.3  | 86.1  | 63.5  | 0.9  | 0.6  | 1.7 | 1.7 |
| 3304 | 010b07 | AV632325 | HC006g07  |   |   | 41.6  | 28.1  | 16.4  | 0.8  | 0.3  | 1.7 | 0.5 |
| 3305 | 034a01 | BP095130 | MXL036d01 |   |   | 18.1  | 19.8  | 12.5  | 1.3  | 0.5  | 1.7 | 0.6 |
| 3306 | 101g12 | AV394022 | CL16b12   |   |   | 2.4   | 2.7   | 1.7   | 1.1  | 0.3  | 1.7 | 0.7 |
| 3307 | 147b10 | AV627418 | LCL026d08 |   |   | 11.3  | 13.5  | 8.5   | 1.2  | 0.0  | 1.7 | 0.7 |
| 3308 | 009c03 | AV390058 | CM086h02  |   |   | 80.2  | 95.0  | 56.9  | 1.2  | 0.2  | 1.7 | 0.8 |
| 3309 | 002b07 | AV394825 | CL32c01   |   |   | 8.5   | 10.1  | 6.0   | 1.3  | 0.6  | 1.7 | 0.5 |
| 3310 | 159e01 | BP087795 | MX043g06  |   |   | 115.5 | 156.9 | 94.2  | 1.8  | 0.8  | 1.7 | 0.8 |
| 3311 | 158c01 | BP087571 | MX037f12  |   |   | 4.6   | 5.9   | 3.7   | 1.4  | 0.4  | 1.7 | 0.6 |
| 3312 | 102e02 | AV394234 | CL22g06   |   |   | 87.5  | 129.8 | 74.7  | 1.6  | 0.6  | 1.7 | 0.1 |
| 3313 | 135d12 | AV619980 | LC015g11  |   |   | 52.0  | 64.8  | 41.7  | 1.2  | 0.0  | 1.7 | 0.9 |
| 3314 | 169g03 |          |           |   |   |       |       |       |      |      |     |     |

|      | A      | B        | C         | D | E | F     | G     | H     | I   | J   | K   | L   |
|------|--------|----------|-----------|---|---|-------|-------|-------|-----|-----|-----|-----|
| 3315 | 144f09 | AV626316 | LCL006g07 |   |   | 8.7   | 10.6  | 6.1   | 1.2 | 0.2 | 1.7 | 0.3 |
| 3316 | 153c03 | AV630391 | LCL078b08 |   |   | 15.2  | 10.7  | 6.2   | 0.8 | 0.2 | 1.7 | 0.2 |
| 3317 | 160c04 | BP088486 | MX061f01  |   |   | 5.1   | 8.6   | 6.0   | 2.1 | 1.2 | 1.7 | 1.0 |
| 3318 | 135e02 | AV620001 | LC016a12  |   |   | 10.2  | 9.1   | 5.9   | 0.9 | 0.3 | 1.7 | 1.0 |
| 3319 | 012h08 | AV637635 | HC075f06  |   |   | 19.9  | 19.2  | 11.2  | 1.0 | 0.3 | 1.7 | 0.6 |
| 3320 | 026a01 | AV627955 | LCL034d11 |   |   | 7.0   | 7.4   | 4.6   | 1.1 | 0.1 | 1.7 | 0.7 |
| 3321 | 163c01 | BP094145 | MXL018g03 |   |   | 17.3  | 20.5  | 13.1  | 1.2 | 0.1 | 1.7 | 0.6 |
| 3322 | 007h02 | AV392403 | CM061e05  |   |   | 5.5   | 7.6   | 4.4   | 1.4 | 0.6 | 1.7 | 0.6 |
| 3323 | 014c03 | AV639867 | HCL006d06 |   |   | 29.4  | 36.3  | 21.9  | 1.2 | 0.0 | 1.7 | 0.6 |
| 3324 | 145a12 | AV626497 | LCL010b06 |   |   | 5.6   | 5.3   | 3.6   | 1.0 | 0.1 | 1.7 | 1.1 |
| 3325 | 164b09 | BP094654 | MXL026e06 |   |   | 10.4  | 8.0   | 6.3   | 0.8 | 0.2 | 1.7 | 1.2 |
| 3326 | 157c01 | BP086701 | MX014f12  |   |   | 33.0  | 34.9  | 27.4  | 1.1 | 0.3 | 1.7 | 1.0 |
| 3327 | 121a09 | AV636765 | HC063h06  |   |   | 17.5  | 29.7  | 16.9  | 1.7 | 0.4 | 1.7 | 0.5 |
| 3328 | 023f01 | AV625251 | LC090a01  |   |   | 16.6  | 19.8  | 11.5  | 1.3 | 0.4 | 1.7 | 0.3 |
| 3329 | 135b05 | AV619740 | LC012e02  |   |   | 9.8   | 17.8  | 10.7  | 1.9 | 0.5 | 1.7 | 0.3 |
| 3330 | 116c09 | AV392325 | CM098d07  |   |   | 10.5  | 10.7  | 8.0   | 1.0 | 0.3 | 1.7 | 1.4 |
| 3331 | 142f09 | AV625366 | LC091e08  |   |   | 25.8  | 26.3  | 18.7  | 1.0 | 0.1 | 1.7 | 1.1 |
| 3332 | 148d03 | AV627977 | LCL034g09 |   |   | 17.3  | 17.5  | 11.9  | 1.0 | 0.3 | 1.7 | 1.0 |
| 3333 | 105b12 | AV397911 | CL59c07   |   |   | 57.4  | 77.5  | 54.6  | 1.2 | 0.4 | 1.7 | 1.4 |
| 3334 | 171b10 | BP097770 | MXL081a11 |   |   | 7.3   | 9.6   | 5.8   | 1.3 | 0.4 | 1.7 | 0.6 |
| 3335 | 132g03 | AV644811 | HCL094b05 |   |   | 6.6   | 10.0  | 5.6   | 1.6 | 0.7 | 1.7 | 0.7 |
| 3336 | 161b03 | BP092962 | MXL001e01 |   |   | 6.9   | 5.1   | 3.8   | 0.8 | 0.2 | 1.7 | 0.9 |
| 3337 | 137c08 | AV621440 | LC036b10  |   |   | 3.3   | 3.0   | 2.3   | 1.0 | 0.3 | 1.7 | 1.1 |
| 3338 | 119g02 | AV635323 | HC044h07  |   |   | 10.0  | 14.1  | 9.3   | 1.4 | 0.2 | 1.7 | 0.8 |
| 3339 | 168c09 | BP096394 | MXL058a12 |   |   | 33.2  | 31.6  | 18.1  | 1.0 | 0.3 | 1.7 | 0.4 |
| 3340 | 125b11 | AV640478 | HCL017a04 |   |   | 13.0  | 15.8  | 10.2  | 1.2 | 0.1 | 1.7 | 0.8 |
| 3341 | 140a11 | AV623587 | LC065h11  |   |   | 38.4  | 50.1  | 29.4  | 1.5 | 0.7 | 1.7 | 0.2 |
| 3342 | 137a10 | AV621184 | LC032d06  |   |   | 7.9   | 6.7   | 4.2   | 0.9 | 0.3 | 1.7 | 0.6 |
| 3343 | 163c03 | BP094153 | MXL018h01 |   |   | 17.8  | 15.7  | 11.8  | 1.0 | 0.7 | 1.7 | 1.3 |
| 3344 | 159f02 | BP087908 | MX046e01  |   |   | 9.3   | 14.2  | 10.9  | 1.7 | 1.2 | 1.7 | 1.4 |
| 3345 | 011a01 | AV633876 | HC026d06  |   |   | 18.6  | 21.5  | 12.8  | 1.2 | 0.2 | 1.7 | 0.7 |
| 3346 | 033a11 | BP093976 | MXL016e03 |   |   | 11.6  | 12.4  | 7.4   | 1.3 | 0.7 | 1.7 | 0.3 |
| 3347 | 009h01 | AV392938 | CM100c05  |   |   | 10.2  | 8.6   | 5.1   | 1.2 | 0.8 | 1.7 | 0.5 |
| 3348 | 162a02 | BP093412 | MXL008a07 |   |   | 24.0  | 33.4  | 23.2  | 1.5 | 0.7 | 1.7 | 1.0 |
| 3349 | 012b04 | AV636185 | HC056c03  |   |   | 15.6  | 13.6  | 8.1   | 0.9 | 0.2 | 1.7 | 0.4 |
| 3350 | 140c05 | AV623718 | LC067f12  |   |   | 5.3   | 16.1  | 9.6   | 3.1 | 2.1 | 1.7 | 0.4 |
| 3351 | 144b04 | AV626145 | LCL003b01 |   |   | 12.7  | 18.5  | 11.0  | 1.5 | 0.2 | 1.7 | 0.4 |
| 3352 | 141a02 | AV624177 | LC074a05  |   |   | 12.5  | 21.9  | 12.8  | 1.8 | 0.9 | 1.7 | 0.3 |
| 3353 | 158c03 | BP087589 | MX038c03  |   |   | 20.6  | 15.2  | 11.2  | 0.7 | 0.2 | 1.7 | 1.2 |
| 3354 | 137a04 | AV621141 | LC031g07  |   |   | 24.8  | 19.0  | 11.4  | 0.8 | 0.1 | 1.7 | 0.4 |
| 3355 | 032g07 | BP093620 | MXL011a10 |   |   | 348.5 | 347.9 | 268.6 | 1.0 | 0.1 | 1.7 | 1.2 |
| 3356 | 111c02 | AV390326 | CM045b08  |   |   | 4.2   | 6.8   | 4.0   | 1.8 | 0.9 | 1.7 | 0.5 |
| 3357 | 009b03 | AV390399 | CM083h09  |   |   | 74.0  | 95.7  | 57.2  | 1.5 | 0.5 | 1.7 | 0.4 |
| 3358 | 121e09 | AV637279 | HC071a07  |   |   | 34.2  | 58.3  | 35.4  | 1.7 | 0.3 | 1.7 | 0.4 |
| 3359 | 022h10 | AV624435 | LC077g01  |   |   | 13.4  | 39.0  | 23.6  | 2.9 | 0.2 | 1.7 | 0.3 |
| 3360 | 135e12 | BP383781 | LC016h02  |   |   | 13.4  | 21.2  | 12.2  | 1.6 | 0.7 | 1.7 | 0.8 |
| 3361 | 107a01 | AV386651 | CM004f05  |   |   | 7.3   | 13.5  | 9.8   | 1.8 | 0.2 | 1.7 | 1.2 |
| 3362 | 035e03 | BP097054 | MXL069c07 |   |   | 19.7  | 18.3  | 11.3  | 0.9 | 0.1 | 1.7 | 0.4 |
| 3363 | 112c11 | AV391722 | CM055g12  |   |   | 5.0   | 5.3   | 3.3   | 1.1 | 0.1 | 1.7 | 0.5 |
| 3364 | 134h12 | AV619599 | LC010e12  |   |   | 8.6   | 24.2  | 15.0  | 2.8 | 0.7 | 1.7 | 0.7 |
| 3365 | 028f02 | AV630145 | LCL074b09 |   |   | 9.4   | 10.0  | 6.0   | 1.1 | 0.2 | 1.7 | 0.4 |
| 3366 | 103f04 | AV395172 | CL39g05   |   |   | 6.7   | 5.9   | 3.5   | 0.9 | 0.1 | 1.7 | 0.4 |
| 3367 | 019g04 | AV620239 | LC019d07  |   |   | 17.2  | 36.1  | 30.3  | 1.9 | 0.7 | 1.7 | 1.2 |
| 3368 | 156b03 | AV631733 | LCL098h09 |   |   | 17.1  | 16.1  | 10.8  | 0.9 | 0.2 | 1.7 | 0.7 |
| 3369 | 103d12 | AV395249 | CL37a04   |   |   | 2.7   | 3.9   | 2.4   | 1.4 | 0.2 | 1.7 | 0.7 |
| 3370 | 137a05 | AV621164 | LC032b06  |   |   | 7.3   | 7.0   | 4.0   | 1.0 | 0.3 | 1.7 | 0.6 |
| 3371 | 011f09 | AV635297 | HC044e08  |   |   | 8.9   | 10.7  | 6.3   | 1.3 | 0.5 | 1.7 | 0.4 |
| 3372 | 022h07 | AV624376 | LC076h10  |   |   | 17.5  | 23.7  | 14.1  | 1.3 | 0.3 | 1.7 | 0.6 |
| 3373 | 019e10 | AV620029 | LC016e09  |   |   | 4.9   | 6.9   | 5.2   | 1.3 | 0.5 | 1.7 | 1.5 |
| 3374 | 166a05 | BP095426 | MXL041f02 |   |   | 6.2   | 5.2   | 3.5   | 0.9 | 0.1 | 1.7 | 0.8 |
| 3375 | 138a10 | AV622077 | LC044g03  |   |   | 133.0 | 123.7 | 89.4  | 0.9 | 0.2 | 1.7 | 1.0 |
| 3376 | 134c03 | AV619102 | LC003g09  |   |   | 10.5  | 14.8  | 9.5   | 1.4 | 0.6 | 1.7 | 1.2 |
| 3377 | 139d09 | AV623075 | LC058f03  |   |   | 201.6 | 217.1 | 127.1 | 1.1 | 0.1 | 1.7 | 0.4 |
| 3378 | 170a03 | BP097205 | MXL071g06 |   |   | 50.8  | 43.4  | 31.0  | 0.9 | 0.1 | 1.7 | 0.9 |
| 3379 | 171b11 | BP097777 | MXL081b09 |   |   | 20.2  | 27.5  | 23.1  | 1.4 | 0.3 | 1.7 | 1.1 |
| 3380 | 133e11 | AV645100 | HCL098c01 |   |   | 33.0  | 59.2  | 33.8  | 1.9 | 1.0 | 1.7 | 0.3 |
| 3381 | 138a09 | AV622070 | LC044f06  |   |   | 26.6  | 21.7  | 12.9  | 0.8 | 0.1 | 1.7 | 0.2 |
| 3382 | 105g09 | AV396782 | CL69b12   |   |   | 6.5   | 6.2   | 3.9   | 0.9 | 0.2 | 1.7 | 0.7 |
| 3383 | 019d12 | AV619935 | LC015c04  |   |   | 4.7   | 9.3   | 6.0   | 1.9 | 0.5 | 1.7 | 1.1 |
| 3384 | 151c08 | AV629412 | LCL058c11 |   |   | 7.1   | 10.8  | 6.1   | 1.4 | 0.7 | 1.7 | 0.9 |
| 3385 | 151d07 | AV629463 | LCL059b09 |   |   | 63.6  | 60.1  | 37.3  | 1.0 | 0.1 | 1.7 | 0.7 |
| 3386 | 140b12 | AV623688 | LC067c11  |   |   | 5.5   | 6.8   | 4.3   | 1.3 | 0.2 | 1.7 | 0.5 |
| 3387 | 171a01 | BP097675 | MXL079d11 |   |   | 37.9  | 40.6  | 27.2  | 1.1 | 0.4 | 1.7 | 0.9 |
| 3388 | 107a03 | AV386854 | CM005b03  |   |   | 9.8   | 17.0  | 11.2  | 1.7 | 0.1 | 1.7 | 0.8 |
| 3389 | 140a03 | AV623541 | LC065d02  |   |   | 58.8  | 50.9  | 30.8  | 0.9 | 0.1 | 1.7 | 0.5 |
| 3390 | 150c12 | AV628945 | LCL049d03 |   |   | 21.9  | 27.3  | 16.2  | 1.3 | 0.3 | 1.7 | 0.1 |
| 3391 | 148b01 | AV627843 | LCL032g10 |   |   | 51.5  | 102.5 | 60.4  | 2.0 | 0.6 | 1.7 | 0.1 |
| 3392 | 021e11 | AV622574 | LC051d09  |   |   | 16.7  | 25.2  | 16.1  | 1.5 | 0.2 | 1.7 | 0.7 |
| 3393 | 167c02 | BP095951 | MXL049h11 |   |   | 4.0   | 5.8   | 3.6   | 1.5 | 0.5 | 1.7 | 0.5 |
| 3394 | 101f12 | AV393897 | CL13c03   |   |   | 1.4   | 1.8   | 1.5   | 1.3 | 0.4 | 1.7 | 1.2 |
| 3395 | 138e03 | AV622295 | LC047g05  |   |   | 9.0   | 23.0  | 13.1  | 3.6 | 3.7 | 1.7 | 0.4 |
| 3396 | 015b02 | AV640727 | HCL021d04 |   |   | 15.7  | 26.3  | 16.2  | 1.7 | 0.5 | 1.7 | 0.6 |
| 3397 | 122f01 | AV638548 | HC087g07  |   |   | 10.9  | 11.7  | 8.5   | 1.1 | 0.3 | 1.7 | 1.1 |
| 3398 | 153f12 | AV630604 | LCL081d08 |   |   | 126.1 | 105.1 | 68.0  | 0.9 | 0.1 | 1.7 | 1.0 |
| 3399 | 138g02 | AV622542 | LC051a07  |   |   | 31.4  | 36.1  | 22.0  | 1.1 | 0.1 | 1.7 | 0.5 |
| 3400 | 148h01 | AV628211 | LCL038e07 |   |   | 15.4  | 19.5  | 12.3  | 1.3 | 0.2 | 1.7 | 0.5 |
| 3401 | 134g06 | AV619504 | LC009c03  |   |   | 7.7   | 12.5  | 7.5   | 1.6 | 0.1 | 1.7 | 0.2 |
| 3402 | 140d04 | BP383808 | LC068g09  |   |   | 19.8  | 38.8  | 25.6  | 2.0 | 0.1 | 1.7 | 0.6 |
| 3403 | 167c04 | BP095961 | MXL050b05 |   |   | 6.9   | 11.2  | 7.1   | 1.6 | 0.3 | 1.7 | 0.4 |
| 3404 | 025f12 | AV627747 | LCL031d10 |   |   | 65.1  | 60.1  | 40.2  | 0.9 | 0.2 | 1.7 | 0.9 |
| 3405 | 139f06 | AV623248 | LC061a07  |   |   | 3.6   | 5.3   | 3.1   | 1.5 | 0.1 | 1.7 | 0.1 |
| 3406 | 169a10 | BP096808 | MXL065c01 |   |   | 41.3  | 36.6  | 28.9  | 0.9 | 0.2 | 1.7 | 1.2 |
| 3407 | 130h07 | AV643744 | HCL075c05 |   |   | 9.2   | 13.1  | 7.8   | 1.4 | 0.7 | 1.7 | 0.6 |
| 3408 | 135h04 | AV620311 | LC020d06  |   |   | 11.0  | 17.2  | 10.9  | 1.5 | 0.2 | 1.7 | 0.9 |
| 3409 | 143f12 | AV625894 | LC099e05  |   |   | 3.0   | 5.1   | 3.2   | 2.0 | 1.1 | 1.7 | 0.4 |
| 3410 | 135b03 | AV619706 | LC012a08  |   |   | 13.0  | 15.6  | 12.8  | 1.3 | 0.8 | 1.7 | 1.6 |
| 3411 | 020e09 | AV621143 | LC031g10  |   |   | 35.3  | 30.8  | 19.6  | 0.9 | 0.2 | 1.7 | 0.5 |
| 3412 | 161b05 | BP092965 | MXL001e05 |   |   | 3.9   | 5.0   | 3.0   | 1.5 | 0.6 | 1.7 | 0.1 |
| 3413 | 170b03 | BP097264 | MXL072g01 |   |   | 6.2   | 5.6   | 3.9   | 1.0 | 0.4 | 1.7 | 0.7 |
| 3414 | 171c02 | BP097805 | MXL081f01 |   |   | 4.1   | 7.3   | 4.6   | 1.9 | 0.5 | 1.7 | 0.4 |
| 3415 | 019b07 | AV619632 | LC011a06  |   |   | 8.8   | 19.6  | 11.8  | 2.4 | 0.9 | 1.7 | 0.2 |
| 3416 | 106g07 | AV386608 | CM003b11  |   |   | 8.3   | 6.8   | 4.1   | 0.8 | 0.1 | 1.7 | 0.2 |
| 3417 | 106c05 | AV397275 | CL77b01   |   |   | 7.5   | 11.1  | 6.9   | 1.5 | 0.5 | 1.7 | 0.8 |
| 3418 | 004f04 | AV386931 | CM011e04  |   |   | 24.8  | 28.3  | 17.0  | 1.1 | 0.1 | 1.7 | 0.1 |
| 3419 | 017d03 | AV643190 | HCL065c10 |   |   | 1.3   | 1.6   | 1.1   | 1.3 | 0.3 | 1.7 | 0.6 |
| 3420 | 109d12 | AV387510 | CM026h09  |   |   | 114.4 | 146.0 | 91.2  | 1.3 | 0.3 | 1.7 | 0.4 |
| 3421 | 143a0  |          |           |   |   |       |       |       |     |     |     |     |

|      | A      | B        | C         | D | E | F     | G     | H     | I    | J    | K   | L   |
|------|--------|----------|-----------|---|---|-------|-------|-------|------|------|-----|-----|
| 3422 | 116e06 | AV393172 | CM100a09  |   |   | 12.8  | 20.7  | 13.1  | 1.6  | 0.3  | 1.7 | 0.6 |
| 3423 | 019e11 | AV620032 | LC016f02  |   |   | 12.2  | 9.6   | 11.2  | 0.8  | 0.3  | 1.7 | 1.5 |
| 3424 | 020g09 | AV621479 | LC036f11  |   |   | 11.4  | 15.0  | 9.6   | 1.4  | 0.3  | 1.7 | 0.6 |
| 3425 | 025e02 | AV627425 | LCL026e04 |   |   | 8.1   | 12.9  | 7.7   | 1.7  | 0.5  | 1.7 | 0.3 |
| 3426 | 133f02 | AV645111 | HCL098d03 |   |   | 11.0  | 34.9  | 21.0  | 3.1  | 0.5  | 1.7 | 0.2 |
| 3427 | 172a08 | BP098181 | MXL088h02 |   |   | 7.9   | 9.1   | 6.6   | 1.1  | 0.1  | 1.7 | 0.6 |
| 3428 | 101e08 | AV393681 | CL10f09   |   |   | 8.0   | 8.5   | 5.3   | 1.1  | 0.0  | 1.7 | 0.4 |
| 3429 | 122f10 | BP383720 | HC089f10  |   |   | 98.3  | 101.4 | 61.5  | 1.5  | 1.0  | 1.7 | 0.2 |
| 3430 | 101c06 | AV393930 | CL04a04   |   |   | 9.1   | 10.1  | 6.3   | 1.2  | 0.8  | 1.7 | 0.7 |
| 3431 | 136f03 | BP383786 | LC026h07  |   |   | 35.4  | 48.9  | 35.1  | 1.4  | 0.4  | 1.7 | 0.9 |
| 3432 | 145a06 | AV626468 | LCL009f05 |   |   | 17.8  | 13.1  | 7.9   | 0.7  | 0.1  | 1.7 | 0.1 |
| 3433 | 150c09 | AV628939 | LCL049c05 |   |   | 61.7  | 52.9  | 33.4  | 0.9  | 0.2  | 1.7 | 0.3 |
| 3434 | 003h01 | AV397282 | CL77e05   |   |   | 4.9   | 10.1  | 6.1   | 2.3  | 0.7  | 1.7 | 0.2 |
| 3435 | 128h08 | AV642599 | HCL054e04 |   |   | 138.8 | 199.0 | 119.2 | 1.3  | 0.5  | 1.7 | 1.3 |
| 3436 | 013f04 | AV639089 | HC094h03  |   |   | 25.4  | 32.4  | 20.2  | 1.3  | 0.3  | 1.7 | 0.4 |
| 3437 | 144a02 | AV626065 | LCL001h05 |   |   | 13.5  | 20.4  | 12.3  | 1.6  | 0.8  | 1.7 | 0.2 |
| 3438 | 156c09 | AV631833 | LCL100e11 |   |   | 127.8 | 113.2 | 79.0  | 0.9  | 0.5  | 1.7 | 1.0 |
| 3439 | 168b08 | BP096339 | MXL057a11 |   |   | 5.0   | 8.1   | 5.2   | 1.7  | 0.5  | 1.7 | 0.5 |
| 3440 | 102g12 | AV394807 | CL28b09   |   |   | 18.2  | 16.4  | 10.8  | 0.9  | 0.1  | 1.7 | 0.8 |
| 3441 | 133g08 | AV645208 | HCL099f03 |   |   | 16.6  | 14.8  | 9.6   | 1.0  | 0.3  | 1.7 | 0.5 |
| 3442 | 120b06 | AV635769 | HC050f09  |   |   | 10.7  | 15.4  | 9.5   | 1.4  | 0.1  | 1.7 | 0.6 |
| 3443 | 026a02 | AV627958 | LCL034e05 |   |   | 31.3  | 60.9  | 36.5  | 2.5  | 1.7  | 1.7 | 0.6 |
| 3444 | 172a05 | BP098175 | MXL088g05 |   |   | 164.8 | 191.7 | 109.5 | 1.1  | 0.4  | 1.7 | 0.4 |
| 3445 | 139a02 | AV622749 | LC054a04  |   |   | 11.8  | 26.7  | 16.0  | 2.4  | 1.0  | 1.7 | 0.2 |
| 3446 | 008e04 | AV388326 | CM070h11  |   |   | 7.7   | 12.2  | 7.5   | 1.6  | 0.2  | 1.7 | 0.4 |
| 3447 | 137a09 | AV621181 | LC032d02  |   |   | 11.8  | 11.4  | 7.0   | 1.0  | 0.2  | 1.7 | 0.2 |
| 3448 | 135b09 | AV619766 | LC012h04  |   |   | 12.3  | 17.2  | 11.0  | 1.4  | 0.5  | 1.7 | 0.9 |
| 3449 | 137c03 | AV621354 | LC034h05  |   |   | 7.5   | 6.5   | 4.0   | 0.9  | 0.2  | 1.7 | 0.2 |
| 3450 | 155d06 | AV631405 | LCL093c11 |   |   | 30.5  | 53.0  | 32.6  | 1.9  | 0.7  | 1.7 | 0.2 |
| 3451 | 030d10 | AV631671 | LCL098a02 |   |   | 1.6   | 2.4   | 2.4   | 1.5  | 0.4  | 1.7 | 1.6 |
| 3452 | 033a08 | BP093937 | MXL015h12 |   |   | 13.8  | 16.4  | 10.2  | 1.2  | 0.2  | 1.7 | 0.4 |
| 3453 | 168c11 | BP096407 | MXL058c03 |   |   | 12.8  | 18.3  | 12.6  | 1.6  | 0.7  | 1.6 | 0.9 |
| 3454 | 142a06 | AV624865 | LC083g07  |   |   | 11.5  | 10.4  | 6.8   | 1.0  | 0.3  | 1.6 | 0.7 |
| 3455 | 144e11 | AV626298 | LCL006b08 |   |   | 11.3  | 41.4  | 25.3  | 4.7  | 3.3  | 1.6 | 0.3 |
| 3456 | 129h08 | AV643127 | HCL064c02 |   |   | 12.7  | 15.4  | 9.5   | 1.2  | 0.3  | 1.6 | 0.6 |
| 3457 | 123f11 | AV639726 | HCL003g12 |   |   | 10.0  | 13.3  | 8.1   | 1.3  | 0.1  | 1.6 | 0.3 |
| 3458 | 034d02 | BP095670 | MXL045e09 |   |   | 10.9  | 13.6  | 9.4   | 1.3  | 0.4  | 1.6 | 0.8 |
| 3459 | 003c10 | AV397917 | CL59c12   |   |   | 3.6   | 4.4   | 2.9   | 1.3  | 0.2  | 1.6 | 0.4 |
| 3460 | 164b04 | BP094644 | MXL026c10 |   |   | 9.0   | 8.1   | 5.5   | 0.9  | 0.1  | 1.6 | 0.6 |
| 3461 | 101h02 | AV394002 | CL16d09   |   |   | 4.9   | 6.1   | 4.0   | 1.3  | 0.0  | 1.6 | 0.5 |
| 3462 | 143c05 | AV625643 | LC095h05  |   |   | 8.5   | 14.5  | 8.7   | 1.7  | 0.2  | 1.6 | 0.3 |
| 3463 | 105h03 | AV396857 | CL70c01   |   |   | 70.5  | 71.0  | 43.4  | 1.1  | 0.2  | 1.6 | 0.8 |
| 3464 | 026h04 | AV628611 | LCL044e06 |   |   | 29.9  | 79.5  | 47.5  | 3.3  | 2.1  | 1.6 | 0.3 |
| 3465 | 151c05 | AV629405 | LCL058b08 |   |   | 98.6  | 112.9 | 77.8  | 1.1  | 0.0  | 1.6 | 0.7 |
| 3466 | 018a02 | AV644070 | HCL081b11 |   |   | 4.6   | 10.1  | 6.1   | 2.2  | 0.4  | 1.6 | 0.3 |
| 3467 | 163a10 | BP094059 | MXL017f01 |   |   | 10.9  | 13.5  | 10.3  | 1.2  | 0.1  | 1.6 | 0.9 |
| 3468 | 133a10 | AV644952 | HCL095h06 |   |   | 113.7 | 133.9 | 94.6  | 1.2  | 0.2  | 1.6 | 0.8 |
| 3469 | 134b05 | AV619010 | LC002e10  |   |   | 10.0  | 14.0  | 8.9   | 1.4  | 0.9  | 1.6 | 1.1 |
| 3470 | 150h03 | AV629194 | LCL054a02 |   |   | 104.1 | 93.1  | 70.4  | 0.9  | 0.1  | 1.6 | 1.1 |
| 3471 | 021f06 | AV622643 | LC052d03  |   |   | 41.5  | 42.5  | 38.6  | 1.1  | 0.3  | 1.6 | 1.1 |
| 3472 | 102c01 | AV394210 | CL19h08   |   |   | 6.9   | 9.9   | 6.4   | 1.6  | 0.6  | 1.6 | 0.5 |
| 3473 | 133b12 | AV644988 | HCL096f02 |   |   | 23.0  | 35.9  | 21.7  | 1.5  | 0.4  | 1.6 | 0.1 |
| 3474 | 016e08 | AV642287 | HCL049a10 |   |   | 25.6  | 27.0  | 16.5  | 1.2  | 0.6  | 1.6 | 0.3 |
| 3475 | 162b03 | BP093507 | MXL009d01 |   |   | 14.9  | 14.2  | 10.2  | 1.0  | 0.4  | 1.6 | 0.9 |
| 3476 | 123c06 | AV639431 | HC099c08  |   |   | 11.8  | 17.7  | 10.8  | 1.4  | 0.8  | 1.6 | 1.1 |
| 3477 | 137b11 | AV621296 | LC034a08  |   |   | 14.3  | 17.5  | 11.2  | 1.5  | 0.9  | 1.6 | 0.5 |
| 3478 | 139f11 | AV623306 | LC061h07  |   |   | 6.6   | 31.4  | 19.3  | 4.8  | 0.9  | 1.6 | 0.2 |
| 3479 | 026f12 | AV628516 | LCL043b02 |   |   | 17.2  | 25.1  | 15.0  | 1.5  | 0.8  | 1.6 | 0.2 |
| 3480 | 014h02 | AV640475 | HCL017a01 |   |   | 3.6   | 5.8   | 3.6   | 1.7  | 0.4  | 1.6 | 0.4 |
| 3481 | 029g03 | AV631059 | LCL088c02 |   |   | 13.4  | 13.0  | 8.3   | 1.0  | 0.0  | 1.6 | 0.4 |
| 3482 | 121b11 | AV636920 | HC066a11  |   |   | 10.0  | 11.3  | 6.8   | 1.1  | 0.2  | 1.6 | 0.3 |
| 3483 | 025c09 | AV627261 | LCL029h10 |   |   | 114.8 | 128.7 | 96.6  | 1.1  | 0.2  | 1.6 | 1.0 |
| 3484 | 116f09 | AV397978 | CS001d02  |   |   | 5.2   | 7.4   | 4.6   | 1.5  | 0.4  | 1.6 | 0.3 |
| 3485 | 149d12 | AV628502 | LCL042h05 |   |   | 14.8  | 21.8  | 13.5  | 1.5  | 0.3  | 1.6 | 0.4 |
| 3486 | 106d08 | AV397298 | CL80b05   |   |   | 371.5 | 482.8 | 298.9 | 1.4  | 0.4  | 1.6 | 0.2 |
| 3487 | 139g09 | AV623387 | LC063a06  |   |   | 5.1   | 8.5   | 4.8   | 1.5  | 0.9  | 1.6 | 1.0 |
| 3488 | 112d01 | AV391756 | CM056a10  |   |   | 42.7  | 68.1  | 56.5  | 1.6  | 0.2  | 1.6 | 0.9 |
| 3489 | 018f01 | AV619009 | LC002e09  |   |   | 4.0   | 6.4   | 4.1   | 1.7  | 0.7  | 1.6 | 0.5 |
| 3490 | 006a01 | AV388773 | CM032c09  |   |   | 6.6   | 9.3   | 5.5   | 1.4  | 0.3  | 1.6 | 0.3 |
| 3491 | 001b01 | AV393410 | CL03h11   |   |   | 59.7  | 96.1  | 58.9  | 1.9  | 0.7  | 1.6 | 0.5 |
| 3492 | 115e12 | AV391192 | CM089e09  |   |   | 11.3  | 12.2  | 7.6   | 1.1  | 0.2  | 1.6 | 0.2 |
| 3493 | 006c05 | AV389551 | CM038d04  |   |   | 15.6  | 24.2  | 14.5  | 1.5  | 0.2  | 1.6 | 0.6 |
| 3494 | 022a11 | AV623365 | LC062f11  |   |   | 123.6 | 78.4  | 48.8  | 0.6  | 0.2  | 1.6 | 0.4 |
| 3495 | 141d04 | BP383816 | LC077h02  |   |   | 260.3 | 329.2 | 207.7 | 1.3  | 0.3  | 1.6 | 0.4 |
| 3496 | 116c10 | AV397521 | CM098d10  |   |   | 39.1  | 14.7  | 9.6   | 0.7  | 0.5  | 1.6 | 0.6 |
| 3497 | 114f10 | AV389647 | CM079d05  |   |   | 4.0   | 5.0   | 3.1   | 1.3  | 0.6  | 1.6 | 0.5 |
| 3498 | 140a02 | AV623526 | LC065b08  |   |   | 7.5   | 7.4   | 4.7   | 1.0  | 0.2  | 1.6 | 0.3 |
| 3499 | 152a04 | AV629746 | LCL065b04 |   |   | 14.7  | 12.8  | 7.9   | 0.9  | 0.2  | 1.6 | 0.1 |
| 3500 | 015g01 | AV641333 | HCL031g09 |   |   | 0.8   | 1.7   | 1.1   | 2.5  | 1.1  | 1.6 | 0.4 |
| 3501 | 114c12 | AV389264 | CM075g02  |   |   | 65.2  | 88.4  | 54.7  | 1.3  | 0.2  | 1.6 | 0.5 |
| 3502 | 121b10 | AV636911 | HC066a01  |   |   | 24.4  | 31.8  | 19.4  | 1.2  | 0.6  | 1.6 | 1.2 |
| 3503 | 165b11 | BP095114 | MXL036a12 |   |   | 16.7  | 15.3  | 12.6  | 0.9  | 0.2  | 1.6 | 0.9 |
| 3504 | 033f03 | BP094612 | MXL025f09 |   |   | 19.0  | 18.7  | 13.0  | 1.0  | 0.1  | 1.6 | 0.6 |
| 3505 | 010a04 | AV632104 | HC004a03  |   |   | 8.2   | 9.3   | 5.8   | 1.3  | 0.4  | 1.6 | 0.1 |
| 3506 | 023a11 | AV624625 | LC080d05  |   |   | 14.5  | 16.0  | 9.9   | 1.1  | 0.2  | 1.6 | 0.3 |
| 3507 | 003b02 | AV396051 | CL55a06   |   |   | 3.7   | 13.3  | 8.5   | 3.9  | 1.9  | 1.6 | 0.4 |
| 3508 | 108h05 | AV387857 | CM022e03  |   |   | 54.5  | 63.6  | 37.7  | 1.2  | 0.0  | 1.6 | 0.7 |
| 3509 | 006f02 | AV390199 | CM043e11  |   |   | 13.7  | 18.9  | 12.0  | 1.4  | 0.3  | 1.6 | 0.4 |
| 3510 | 008c11 | AV393278 | CM068g07  |   |   | 19.1  | 25.5  | 15.9  | 1.4  | 0.3  | 1.6 | 0.2 |
| 3511 | 136a09 | AV620446 | LC022c07  |   |   | 10.1  | 14.2  | 8.6   | 1.4  | 0.3  | 1.6 | 0.3 |
| 3512 | 142b07 | AV624972 | LC085b12  |   |   | 8.4   | 14.7  | 9.4   | 1.8  | 0.2  | 1.6 | 0.3 |
| 3513 | 109f09 | AV388323 | CM028e10  |   |   | 7.3   | 9.5   | 6.1   | 1.3  | 0.4  | 1.6 | 0.6 |
| 3514 | 150h12 | AV629279 | LCL055g10 |   |   | 10.4  | 218.6 | 138.7 | 22.2 | 10.0 | 1.6 | 0.2 |
| 3515 | 167b08 | BP095920 | MXL049d08 |   |   | 5.4   | 6.4   | 4.7   | 1.5  | 0.8  | 1.6 | 0.6 |
| 3516 | 004c07 | AV386685 | CM004h10  |   |   | 19.9  | 26.0  | 17.6  | 1.3  | 0.2  | 1.6 | 0.9 |
| 3517 | 116f05 | AV392836 | CM100f05  |   |   | 28.8  | 66.1  | 41.8  | 2.3  | 0.9  | 1.6 | 0.6 |
| 3518 | 149b09 | AV628381 | LCL040h05 |   |   | 5.0   | 6.8   | 4.4   | 1.4  | 0.5  | 1.6 | 0.6 |
| 3519 | 129h12 | AV643149 | HCL064f10 |   |   | 162.8 | 166.8 | 115.8 | 1.0  | 0.0  | 1.6 | 0.7 |
| 3520 | 110a09 | AV388809 | CM032g12  |   |   | 3.5   | 4.9   | 3.2   | 1.4  | 0.1  | 1.6 | 0.5 |
| 3521 | 134b10 | AV619066 | LC003c11  |   |   | 11.6  | 17.4  | 11.5  | 1.5  | 0.5  | 1.6 | 0.9 |
| 3522 | 119d12 | AV635048 | HC041c04  |   |   | 64.0  | 81.8  | 53.3  | 1.3  | 0.0  | 1.6 | 0.4 |
| 3523 | 151b11 | AV629375 | LCL057f04 |   |   | 7.7   | 12.1  | 7.6   | 1.6  | 0.2  | 1.6 | 0.2 |
| 3524 | 117e11 | AV632817 | HC013a02  |   |   | 4.2   | 4.1   | 2.7   | 1.0  | 0.2  | 1.6 | 0.4 |
| 3525 | 101g05 | BP094556 | MXL024h07 |   |   | 6.8   | 9.3   | 6.1   | 1.5  | 0.5  | 1.6 | 0.6 |
| 3526 | 116g01 | AV398009 | CS001h01  |   |   | 7.6   | 4.5   | 3.0   | 0.9  | 0.6  | 1.6 | 0.5 |
| 3527 | 008b01 | AV392846 | CM064h05  |   |   | 9.8   | 12.0  | 7.5   | 1.3  | 0.2  | 1.6 | 0.1 |
| 35   |        |          |           |   |   |       |       |       |      |      |     |     |

|      | A      | B        | C         | D | E | F     | G     | H     | I   | J   | K   | L   |
|------|--------|----------|-----------|---|---|-------|-------|-------|-----|-----|-----|-----|
| 3529 | 133d07 | BP383773 | HCL097e05 |   |   | 32.0  | 43.7  | 28.6  | 1.6 | 0.6 | 1.6 | 0.4 |
| 3530 | 172c08 | BP098314 | MXL091d01 |   |   | 15.3  | 19.4  | 12.9  | 1.3 | 0.2 | 1.6 | 0.7 |
| 3531 | 020g03 | AV621404 | LC035f03  |   |   | 45.6  | 116.8 | 97.0  | 2.4 | 1.3 | 1.6 | 1.0 |
| 3532 | 123d04 | AV639522 | HC100e01  |   |   | 47.5  | 48.4  | 31.5  | 1.0 | 0.1 | 1.6 | 0.5 |
| 3533 | 169b01 | BP096831 | MXL065e11 |   |   | 27.4  | 22.4  | 15.8  | 0.8 | 0.1 | 1.6 | 0.8 |
| 3534 | 155c05 | AV631349 | LCL092d10 |   |   | 7.1   | 11.8  | 7.4   | 2.0 | 0.9 | 1.6 | 0.2 |
| 3535 | 117h02 | AV633202 | HCO18a01  |   |   | 3.9   | 4.3   | 2.8   | 1.2 | 0.3 | 1.6 | 0.2 |
| 3536 | 132c06 | AV644621 | HCL091d02 |   |   | 14.2  | 15.4  | 10.1  | 1.1 | 0.1 | 1.6 | 0.5 |
| 3537 | 130e11 | AV643572 | HCL072a08 |   |   | 5.4   | 7.1   | 4.5   | 1.3 | 0.1 | 1.6 | 0.2 |
| 3538 | 003a07 | AV395992 | CL53c11   |   |   | 53.6  | 62.8  | 39.1  | 1.4 | 0.5 | 1.6 | 0.4 |
| 3539 | 165d05 | BP095180 | MXL037c04 |   |   | 8.4   | 13.8  | 8.9   | 1.6 | 0.5 | 1.6 | 0.7 |
| 3540 | 017h11 | AV644010 | HCL080b07 |   |   | 5.3   | 3.6   | 2.6   | 0.7 | 0.1 | 1.6 | 0.9 |
| 3541 | 034h05 | BP096372 | MXL057f10 |   |   | 3.8   | 28.1  | 17.8  | 7.4 | 1.5 | 1.6 | 0.3 |
| 3542 | 160e02 | BP088664 | MX066b02  |   |   | 9.8   | 12.0  | 9.1   | 1.3 | 0.7 | 1.6 | 1.1 |
| 3543 | 102e05 | AV394459 | CL23c10   |   |   | 7.0   | 7.7   | 4.7   | 1.1 | 0.2 | 1.6 | 0.4 |
| 3544 | 024a05 | AV626277 | LCL005f09 |   |   | 47.9  | 66.0  | 41.9  | 1.4 | 0.2 | 1.6 | 0.3 |
| 3545 | 112a01 | AV391304 | CM053c12  |   |   | 4.9   | 8.0   | 5.0   | 1.8 | 0.6 | 1.6 | 0.2 |
| 3546 | 171c11 | BP097848 | MXL082c08 |   |   | 40.0  | 53.9  | 34.4  | 1.3 | 0.1 | 1.6 | 0.6 |
| 3547 | 154b05 | AV630814 | LCL084f11 |   |   | 131.3 | 168.5 | 105.3 | 1.2 | 0.6 | 1.6 | 1.0 |
| 3548 | 135h10 | AV620359 | LC021a09  |   |   | 9.1   | 10.6  | 6.8   | 1.2 | 0.1 | 1.6 | 0.5 |
| 3549 | 028b05 | AV629657 | LCL062g12 |   |   | 12.2  | 16.7  | 10.6  | 1.4 | 0.7 | 1.6 | 0.9 |
| 3550 | 103g03 | AV395433 | CL41d12   |   |   | 3.2   | 4.1   | 2.7   | 1.3 | 0.4 | 1.6 | 0.7 |
| 3551 | 140f12 | AV624009 | LC071f11  |   |   | 7.8   | 17.8  | 11.1  | 2.2 | 0.7 | 1.6 | 0.6 |
| 3552 | 002a05 | AV394804 | CL28d05   |   |   | 20.5  | 46.5  | 29.4  | 2.5 | 1.0 | 1.6 | 0.1 |
| 3553 | 025e01 | AV627422 | LCL026d12 |   |   | 29.1  | 34.4  | 21.6  | 1.2 | 0.1 | 1.6 | 0.1 |
| 3554 | 007b01 | AV391076 | CM050e11  |   |   | 11.5  | 16.7  | 10.5  | 1.4 | 0.2 | 1.6 | 0.1 |
| 3555 | 133c12 | AV645025 | HCL097b06 |   |   | 6.6   | 24.8  | 15.1  | 3.7 | 1.3 | 1.6 | 0.4 |
| 3556 | 166c11 | BP095592 | MXL044c10 |   |   | 10.0  | 10.0  | 8.4   | 1.1 | 0.5 | 1.6 | 1.0 |
| 3557 | 105f05 | AV396740 | CL66g01   |   |   | 67.9  | 127.2 | 85.9  | 2.0 | 1.4 | 1.6 | 1.2 |
| 3558 | 164g11 | BP094950 | MXL033b05 |   |   | 103.3 | 152.9 | 106.4 | 1.4 | 0.3 | 1.6 | 1.1 |
| 3559 | 133b05 | BP383766 | HCL096d04 |   |   | 76.8  | 89.6  | 58.7  | 1.5 | 0.8 | 1.6 | 0.4 |
| 3560 | 141b08 | AV624332 | LC076c06  |   |   | 27.5  | 33.9  | 21.2  | 1.3 | 0.6 | 1.6 | 0.3 |
| 3561 | 160e12 | BP088804 | MX101c05  |   |   | 179.4 | 298.2 | 193.9 | 1.7 | 0.0 | 1.6 | 0.4 |
| 3562 | 014b07 | AV639768 | HCL004f12 |   |   | 4.0   | 3.6   | 2.5   | 0.9 | 0.1 | 1.6 | 0.8 |
| 3563 | 006b02 | AV389121 | CM035c05  |   |   | 4.8   | 14.3  | 8.9   | 3.2 | 1.7 | 1.6 | 0.1 |
| 3564 | 132a09 | AV644448 | HCL088g04 |   |   | 15.6  | 19.8  | 13.0  | 1.3 | 0.2 | 1.6 | 0.3 |
| 3565 | 026a04 | AV627989 | LCL035a03 |   |   | 18.9  | 32.6  | 23.3  | 1.8 | 0.4 | 1.6 | 0.7 |
| 3566 | 106c01 | AV397134 | CL76d09   |   |   | 10.4  | 19.0  | 12.0  | 1.8 | 0.2 | 1.6 | 0.1 |
| 3567 | 169e08 | BP097020 | MXL068g09 |   |   | 7.1   | 13.4  | 8.7   | 2.0 | 0.4 | 1.6 | 0.4 |
| 3568 | 116g07 | AV631885 | HC001c07  |   |   | 6.0   | 7.9   | 5.1   | 1.3 | 0.2 | 1.6 | 0.3 |
| 3569 | 169c01 | BP096873 | MXL066c03 |   |   | 13.9  | 13.4  | 8.7   | 1.0 | 0.2 | 1.6 | 0.4 |
| 3570 | 164g05 | BP094897 | MXL031h08 |   |   | 147.9 | 117.7 | 76.6  | 0.9 | 0.2 | 1.6 | 0.5 |
| 3571 | 102f09 | AV394580 | CL26f04   |   |   | 24.6  | 19.8  | 12.8  | 0.8 | 0.1 | 1.6 | 0.3 |
| 3572 | 142f07 | AV625356 | LC091d09  |   |   | 272.7 | 248.4 | 157.8 | 0.9 | 0.1 | 1.6 | 0.5 |
| 3573 | 006b07 | AV389239 | CM035g03  |   |   | 9.5   | 10.9  | 7.2   | 1.2 | 0.3 | 1.6 | 0.5 |
| 3574 | 028h07 | AV630381 | LCL078a09 |   |   | 21.4  | 20.7  | 13.5  | 1.0 | 0.1 | 1.6 | 0.3 |
| 3575 | 161b09 | BP092976 | MXL001f08 |   |   | 31.2  | 27.1  | 19.2  | 0.9 | 0.1 | 1.6 | 0.7 |
| 3576 | 134h04 | AV619578 | LC010c08  |   |   | 13.4  | 14.9  | 9.6   | 1.2 | 0.3 | 1.6 | 0.2 |
| 3577 | 027b02 | AV628870 | LCL048c05 |   |   | 7.7   | 6.9   | 4.9   | 0.9 | 0.2 | 1.6 | 0.7 |
| 3578 | 140d12 | AV623843 | LC069d10  |   |   | 8.3   | 20.9  | 13.4  | 2.6 | 0.7 | 1.6 | 0.4 |
| 3579 | 106d01 | AV397202 | CL78h03   |   |   | 21.3  | 34.6  | 29.7  | 1.7 | 0.4 | 1.6 | 0.9 |
| 3580 | 134b01 | AV618987 | LC002c05  |   |   | 18.0  | 19.6  | 14.5  | 1.1 | 0.3 | 1.6 | 0.9 |
| 3581 | 110g01 | AV389726 | CM039d09  |   |   | 2.1   | 3.1   | 2.0   | 1.5 | 0.2 | 1.6 | 0.6 |
| 3582 | 028h09 | AV630399 | LCL078c08 |   |   | 2.0   | 2.6   | 1.7   | 2.0 | 1.9 | 1.6 | 0.7 |
| 3583 | 161c03 | BP093003 | MXL002a08 |   |   | 7.8   | 11.0  | 8.2   | 2.0 | 1.3 | 1.6 | 0.7 |
| 3584 | 002h02 | AV395744 | CL50a03   |   |   | 15.3  | 22.0  | 13.5  | 1.4 | 0.6 | 1.6 | 0.5 |
| 3585 | 101c08 | AV393363 | CL04d03   |   |   | 51.1  | 51.5  | 32.9  | 1.1 | 0.3 | 1.6 | 0.2 |
| 3586 | 136b02 | AV620462 | LC022e02  |   |   | 42.0  | 41.6  | 26.9  | 1.0 | 0.1 | 1.6 | 0.3 |
| 3587 | 123b05 | BP383723 | HC097g02  |   |   | 42.0  | 42.0  | 27.5  | 1.0 | 0.1 | 1.6 | 0.8 |
| 3588 | 027c05 | AV629069 | LCL051c12 |   |   | 11.3  | 14.7  | 9.9   | 1.3 | 0.6 | 1.6 | 1.0 |
| 3589 | 169c08 | BP096908 | MXL068h07 |   |   | 9.4   | 20.6  | 13.3  | 2.2 | 0.3 | 1.6 | 0.2 |
| 3590 | 001b12 | AV393485 | CL07c01   |   |   | 4.1   | 4.6   | 3.2   | 1.1 | 0.5 | 1.6 | 0.8 |
| 3591 | 031h07 | BP087453 | MX034h03  |   |   | 69.8  | 54.8  | 35.8  | 0.8 | 0.0 | 1.6 | 0.2 |
| 3592 | 155c01 | AV631337 | LCL092c04 |   |   | 20.3  | 18.2  | 15.5  | 0.9 | 0.3 | 1.6 | 1.0 |
| 3593 | 110h09 | AV389951 | CM040h05  |   |   | 34.0  | 42.3  | 27.4  | 1.3 | 0.5 | 1.6 | 0.6 |
| 3594 | 136g02 | AV620853 | LC027f12  |   |   | 6.8   | 10.9  | 6.9   | 1.6 | 0.2 | 1.6 | 0.2 |
| 3595 | 153a01 | AV630262 | LCL076c06 |   |   | 8.5   | 7.0   | 4.6   | 0.8 | 0.2 | 1.6 | 0.9 |
| 3596 | 156f11 | BP086285 | MX005g08  |   |   | 260.5 | 290.3 | 180.2 | 1.1 | 0.1 | 1.6 | 0.4 |
| 3597 | 139b02 | AV622837 | LC055c10  |   |   | 27.3  | 24.9  | 15.7  | 0.9 | 0.1 | 1.6 | 0.1 |
| 3598 | 006e01 | AV390013 | CM041c11  |   |   | 17.1  | 19.8  | 12.9  | 1.2 | 0.2 | 1.6 | 0.3 |
| 3599 | 017e01 | AV643250 | HCL066d04 |   |   | 6.8   | 8.4   | 5.6   | 1.3 | 0.2 | 1.6 | 0.4 |
| 3600 | 157h01 | BP087177 | MX027d07  |   |   | 7.7   | 6.1   | 5.6   | 0.9 | 0.8 | 1.6 | 1.5 |
| 3601 | 021c12 | AV622190 | LC046d01  |   |   | 69.2  | 76.6  | 66.9  | 1.1 | 0.1 | 1.6 | 1.1 |
| 3602 | 119h03 | AV635513 | HC047c08  |   |   | 10.1  | 12.6  | 8.2   | 1.2 | 0.1 | 1.6 | 0.2 |
| 3603 | 141e08 | AV624568 | LC079e04  |   |   | 10.8  | 16.3  | 11.9  | 1.7 | 0.5 | 1.6 | 0.6 |
| 3604 | 172b10 | BP098266 | MXL090e05 |   |   | 5.0   | 6.7   | 4.5   | 1.4 | 0.3 | 1.6 | 0.6 |
| 3605 | 001e01 | AV393856 | CL14b04   |   |   | 124.7 | 183.3 | 117.9 | 1.4 | 0.3 | 1.6 | 0.6 |
| 3606 | 149b03 | AV628351 | LCL040d12 |   |   | 9.9   | 9.4   | 6.2   | 1.1 | 0.5 | 1.6 | 0.2 |
| 3607 | 129e10 | AV642928 | HCL060g01 |   |   | 33.7  | 39.2  | 25.4  | 1.2 | 0.2 | 1.6 | 0.3 |
| 3608 | 164c02 | BP094674 | MXL027a03 |   |   | 16.9  | 19.9  | 14.2  | 1.5 | 0.9 | 1.6 | 0.7 |
| 3609 | 158a12 | BP087460 | MX035a09  |   |   | 15.0  | 14.1  | 12.8  | 0.9 | 0.2 | 1.6 | 1.2 |
| 3610 | 021d01 | AV622191 | LC046d02  |   |   | 29.2  | 21.3  | 14.4  | 0.7 | 0.1 | 1.6 | 0.4 |
| 3611 | 135f12 | AV620175 | LC018f02  |   |   | 5.7   | 7.2   | 4.6   | 1.4 | 0.6 | 1.6 | 0.2 |
| 3612 | 105h08 | AV397031 | CL72b02   |   |   | 18.6  | 17.4  | 11.1  | 1.1 | 0.4 | 1.6 | 0.1 |
| 3613 | 135g12 | AV620256 | LC019f10  |   |   | 6.1   | 6.8   | 4.5   | 1.2 | 0.3 | 1.6 | 0.4 |
| 3614 | 109e06 | AV387635 | CM027c12  |   |   | 3.6   | 4.3   | 2.9   | 1.2 | 0.3 | 1.6 | 0.5 |
| 3615 | 122g10 | AV638896 | HC092c03  |   |   | 121.2 | 111.4 | 74.3  | 1.1 | 0.6 | 1.6 | 0.4 |
| 3616 | 136b04 | AV620467 | LC022e07  |   |   | 5.2   | 6.7   | 5.0   | 1.3 | 0.7 | 1.6 | 1.1 |
| 3617 | 156d08 | BP086101 | MX001h09  |   |   | 18.7  | 29.0  | 19.7  | 1.5 | 0.4 | 1.6 | 0.7 |
| 3618 | 135e03 | AV620004 | LC016b03  |   |   | 10.6  | 11.8  | 8.8   | 1.1 | 0.2 | 1.6 | 0.9 |
| 3619 | 135g02 | AV620196 | LC018h04  |   |   | 15.0  | 23.9  | 14.7  | 1.5 | 0.3 | 1.6 | 0.5 |
| 3620 | 123g05 | AV639770 | HCL004g03 |   |   | 12.4  | 14.5  | 10.1  | 1.1 | 0.6 | 1.6 | 1.3 |
| 3621 | 139e06 | AV623135 | LC059d05  |   |   | 4.4   | 9.2   | 5.8   | 2.1 | 0.6 | 1.6 | 0.4 |
| 3622 | 022a12 | AV623399 | LC063c01  |   |   | 21.2  | 15.6  | 13.6  | 0.7 | 0.1 | 1.6 | 0.9 |
| 3623 | 103h03 | AV395500 | CL42h08   |   |   | 4.4   | 5.1   | 3.3   | 1.2 | 0.2 | 1.6 | 0.2 |
| 3624 | 145d08 | AV626691 | LCL013g08 |   |   | 7.3   | 12.2  | 8.0   | 1.7 | 0.2 | 1.6 | 0.3 |
| 3625 | 107a05 | AV386870 | CM005g03  |   |   | 3.7   | 5.1   | 3.3   | 1.6 | 0.8 | 1.6 | 0.3 |
| 3626 | 019f08 | AV620136 | LC018a10  |   |   | 4.1   | 5.1   | 3.7   | 1.3 | 0.2 | 1.6 | 0.8 |
| 3627 | 001c02 | AV393450 | CL07f04   |   |   | 7.8   | 10.8  | 7.3   | 1.5 | 0.6 | 1.6 | 0.5 |
| 3628 | 019f01 | AV620060 | LC017a09  |   |   | 6.6   | 11.0  | 7.3   | 1.7 | 0.3 | 1.6 | 0.2 |
| 3629 | 001d07 | AV393806 | CL12c07   |   |   | 6.2   | 10.3  | 7.0   | 1.8 | 0.5 | 1.6 | 0.6 |
| 3630 | 127c05 | AV641705 | HCL039a04 |   |   | 11.5  | 16.0  | 9.9   | 1.5 | 0.9 | 1.6 | 0.6 |
| 3631 | 139b08 | AV622872 | LC055h02  |   |   | 68.6  | 73.7  | 47.9  | 1.1 | 0.2 | 1.6 | 0.2 |
| 3632 | 150d06 | AV628964 | LCL049f07 |   |   | 15.2  | 14.6  | 9.0   | 0.9 | 0.2 | 1.6 | 0.6 |
| 3633 | 031c09 | BP086709 | MX014h11  |   |   | 11.4  | 12.8  | 8.8   | 1.1 | 0.3 | 1.6 | 0.8 |
| 3634 | 124a12 | AV639962 | HCL008a01 |   |   | 7.5   | 10.8  | 7.2   | 1.5 | 0.1 | 1.6 | 0.4 |
| 3635 | 153c1  |          |           |   |   |       |       |       |     |     |     |     |



|      | A        | B        | C         | D | E | F     | G     | H     | I   | J   | K   | L   |
|------|----------|----------|-----------|---|---|-------|-------|-------|-----|-----|-----|-----|
| 3636 | 011g06   | AV635449 | HC046e01  |   |   | 12.9  | 15.2  | 9.9   | 1.2 | 0.1 | 1.6 | 0.2 |
| 3637 | 133h04   | AV645253 | HCL100c04 |   |   | 5.8   | 9.1   | 5.7   | 1.6 | 0.8 | 1.6 | 0.4 |
| 3638 | 142a05   | AV624864 | LC083g06  |   |   | 106.2 | 106.1 | 80.2  | 1.0 | 0.1 | 1.6 | 0.8 |
| 3639 | 101f03   | AV393779 | CL11f08   |   |   | 6.9   | 12.0  | 8.6   | 1.7 | 0.1 | 1.6 | 0.6 |
| 3640 | 121g03   | AV637466 | HC073e02  |   |   | 8.0   | 11.3  | 7.4   | 1.5 | 0.5 | 1.6 | 0.5 |
| 3641 | 103a09   | AV395010 | CL31c07   |   |   | 7.0   | 5.6   | 4.8   | 0.7 | 0.3 | 1.6 | 1.4 |
| 3642 | 018h09   | AV619258 | LC005g07  |   |   | 3.3   | 5.2   | 3.7   | 1.3 | 0.7 | 1.6 | 1.4 |
| 3643 | 136e03   | AV620725 | LC026a06  |   |   | 11.4  | 11.3  | 9.3   | 1.0 | 0.1 | 1.6 | 1.0 |
| 3644 | 162e07   | BP093773 | MXL013e12 |   |   | 12.5  | 15.2  | 9.9   | 1.2 | 0.1 | 1.6 | 0.1 |
| 3645 | 171h05   | BP098145 | MXL088b02 |   |   | 21.0  | 22.4  | 26.6  | 1.0 | 0.5 | 1.6 | 1.6 |
| 3646 | 114d04   | AV389527 | CM076b11  |   |   | 20.6  | 18.0  | 11.5  | 1.0 | 0.2 | 1.6 | 0.3 |
| 3647 | 119g07   | AV635362 | HC045d10  |   |   | 4.9   | 6.3   | 4.3   | 1.4 | 0.6 | 1.6 | 0.3 |
| 3648 | 025a09   | AV627036 | LCL020b08 |   |   | 11.1  | 14.9  | 9.7   | 1.4 | 0.2 | 1.6 | 0.2 |
| 3649 | 103c12   | AV394943 | CL34g12   |   |   | 25.1  | 27.8  | 19.2  | 1.2 | 0.6 | 1.6 | 0.6 |
| 3650 | 115a06   | AV390438 | CM083a01  |   |   | 7.0   | 7.0   | 4.7   | 1.0 | 0.3 | 1.6 | 0.6 |
| 3651 | 138g01   | AV622519 | LC050g04  |   |   | 4.5   | 7.9   | 4.9   | 1.8 | 0.9 | 1.6 | 0.2 |
| 3652 | 033f01   | BP094592 | MXL025d05 |   |   | 5.2   | 5.8   | 4.0   | 1.1 | 0.3 | 1.6 | 0.5 |
| 3653 | 033e02   | BP094421 | MXL022g12 |   |   | 19.0  | 16.3  | 13.5  | 0.9 | 0.1 | 1.6 | 1.0 |
| 3654 | 103a08   | AV395016 | CL31b12   |   |   | 3.4   | 4.3   | 4.1   | 1.2 | 0.3 | 1.6 | 1.4 |
| 3655 | 102b08   | AV394161 | CL19f06   |   |   | 4.4   | 4.8   | 3.3   | 1.1 | 0.2 | 1.6 | 0.5 |
| 3656 | 136g08   | AV620897 | LC028c09  |   |   | 227.1 | 260.9 | 189.0 | 1.2 | 0.1 | 1.6 | 0.6 |
| 3657 | 163c05   | BP094166 | MXL019a03 |   |   | 5.4   | 20.4  | 12.9  | 3.7 | 1.2 | 1.6 | 0.4 |
| 3658 | 137b04   | AV621222 | LC032h09  |   |   | 923.2 | 851.7 | 554.5 | 0.9 | 0.0 | 1.6 | 0.2 |
| 3659 | 160b05   | BP088372 | MX058h03  |   |   | 10.6  | 8.9   | 6.5   | 0.8 | 0.2 | 1.6 | 0.9 |
| 3660 | 103d01   | AV395083 | CL35d10   |   |   | 23.3  | 35.1  | 26.6  | 1.5 | 0.2 | 1.5 | 0.8 |
| 3661 | 169c12   | BP096923 | MXL067b07 |   |   | 8.3   | 8.7   | 6.5   | 1.1 | 0.2 | 1.5 | 0.6 |
| 3662 | 111e03   | AV390781 | CM047h09  |   |   | 139.6 | 190.6 | 128.8 | 1.4 | 0.2 | 1.5 | 0.3 |
| 3663 | 022e10   | AV623997 | LC071e07  |   |   | 6.4   | 14.3  | 9.1   | 2.2 | 0.4 | 1.5 | 0.6 |
| 3664 | 029g04   | AV631069 | LCL088d01 |   |   | 6.4   | 7.5   | 5.0   | 1.2 | 0.1 | 1.5 | 0.3 |
| 3665 | 129h02   | AV643068 | HCL063b10 |   |   | 12.9  | 17.3  | 11.7  | 1.3 | 0.2 | 1.5 | 0.7 |
| 3666 | 121h01   | AV637566 | HC074g06  |   |   | 14.2  | 18.7  | 12.2  | 1.4 | 0.4 | 1.5 | 0.2 |
| 3667 | 116e09   | AV393200 | CM100b08  |   |   | 24.5  | 19.5  | 15.3  | 0.8 | 0.1 | 1.5 | 1.0 |
| 3668 | 153a04   | AV630279 | LCL076f02 |   |   | 7.2   | 7.6   | 5.0   | 1.1 | 0.3 | 1.5 | 0.3 |
| 3669 | 119c09   | AV634851 | HC038g08  |   |   | 8.5   | 8.5   | 5.9   | 1.0 | 0.1 | 1.5 | 0.6 |
| 3670 | 132d04   | AV644676 | HCL092a12 |   |   | 98.2  | 96.6  | 83.1  | 1.0 | 0.0 | 1.5 | 1.0 |
| 3671 | 010a07   | AV632110 | HC004a11  |   |   | 2.5   | 2.0   | 1.3   | 0.9 | 0.4 | 1.5 | 0.3 |
| 3672 | 143a01   | AV625529 | LC094b09  |   |   | 8.2   | 7.3   | 4.7   | 1.0 | 0.4 | 1.5 | 0.1 |
| 3673 | 105c09   | AV396341 | CL61e10   |   |   | 62.7  | 74.5  | 48.2  | 1.2 | 0.3 | 1.5 | 0.2 |
| 3674 | 007b03   | AV391116 | CM051a03  |   |   | 12.8  | 14.7  | 9.5   | 1.1 | 0.2 | 1.5 | 0.5 |
| 3675 | 115b08   | AV390743 | CM085b01  |   |   | 99.7  | 117.7 | 80.8  | 1.2 | 0.1 | 1.5 | 0.6 |
| 3676 | 105f04   | AV396746 | CL66e09   |   |   | 62.8  | 45.2  | 32.5  | 0.8 | 0.2 | 1.5 | 0.6 |
| 3677 | 002g02   | AV395681 | CL47d01   |   |   | 47.0  | 52.0  | 34.8  | 1.1 | 0.2 | 1.5 | 0.5 |
| 3678 | 109g09   | AV388461 | CM029g04  |   |   | 4.4   | 4.4   | 2.9   | 1.0 | 0.2 | 1.5 | 0.4 |
| 3679 | 149a04   | AV628292 | LCL039f09 |   |   | 13.7  | 13.9  | 9.6   | 1.0 | 0.1 | 1.5 | 0.6 |
| 3680 | 129a09   | AV642653 | HCL055d09 |   |   | 274.5 | 321.4 | 225.4 | 1.2 | 0.1 | 1.5 | 0.3 |
| 3681 | 151h06   | AV629719 | LCL064e02 |   |   | 145.1 | 131.8 | 87.3  | 0.9 | 0.2 | 1.5 | 0.2 |
| 3682 | 132e09   | AV644719 | HCL092g10 |   |   | 54.0  | 46.6  | 31.5  | 1.0 | 0.5 | 1.5 | 0.4 |
| 3683 | 116g08   | AV631888 | HC001c10  |   |   | 8.1   | 10.0  | 6.5   | 1.3 | 0.5 | 1.5 | 0.2 |
| 3684 | 145h04   | AV626884 | LCL017d01 |   |   | 5.3   | 6.9   | 4.7   | 1.3 | 0.4 | 1.5 | 0.7 |
| 3685 | 121h05   | AV637632 | HC075f03  |   |   | 16.2  | 21.0  | 12.8  | 1.3 | 0.7 | 1.5 | 0.6 |
| 3686 | 138b09   | AV622122 | LC045d06  |   |   | 55.6  | 58.9  | 45.7  | 1.0 | 0.2 | 1.5 | 1.0 |
| 3687 | 156c03   | AV631782 | LCL099g09 |   |   | 37.0  | 33.7  | 25.2  | 1.0 | 0.5 | 1.5 | 0.8 |
| 3688 | 023h07   | AV626220 | LCL004e07 |   |   | 6.3   | 10.9  | 7.3   | 1.7 | 0.2 | 1.5 | 0.6 |
| 3689 | 142c06   | AV625035 | LC087a02  |   |   | 5.8   | 7.0   | 4.6   | 1.2 | 0.4 | 1.5 | 0.6 |
| 3690 | 114e08   | AV388541 | CM078b01  |   |   | 23.4  | 31.3  | 20.7  | 1.4 | 0.2 | 1.5 | 0.3 |
| 3691 | 104b12   | AV397778 | CL45g06   |   |   | 5.5   | 8.1   | 5.4   | 1.4 | 0.6 | 1.5 | 0.8 |
| 3692 | 135f02   | AV620057 | LC017a06  |   |   | 7.6   | 16.7  | 11.1  | 2.2 | 1.2 | 1.5 | 0.5 |
| 3693 | 136c11   | AV620638 | LC024g05  |   |   | 16.7  | 16.2  | 10.8  | 1.0 | 0.2 | 1.5 | 0.5 |
| 3694 | 149b02   | AV628349 | LCL040d10 |   |   | 10.2  | 15.1  | 9.9   | 1.6 | 0.6 | 1.5 | 0.1 |
| 3695 | 143a07   | AV625549 | LC094e02  |   |   | 156.5 | 162.9 | 116.0 | 1.0 | 0.1 | 1.5 | 0.8 |
| 3696 | 166b03   | BP095463 | MXL042b10 |   |   | 29.0  | 23.7  | 19.8  | 0.8 | 0.2 | 1.5 | 0.9 |
| 3697 | 005a01   | AV387458 | CM016h04  |   |   | 20.2  | 23.4  | 14.9  | 1.1 | 0.2 | 1.5 | 0.3 |
| 3698 | 001e04   | AV393938 | CL15a02   |   |   | 2.4   | 4.3   | 2.9   | 1.8 | 0.4 | 1.5 | 0.4 |
| 3699 | 113h05   | AV388507 | CM071b04  |   |   | 25.8  | 20.4  | 13.4  | 0.8 | 0.1 | 1.5 | 0.2 |
| 3700 | 028b02   | AV629608 | LCL061h08 |   |   | 9.7   | 6.8   | 6.2   | 0.7 | 0.1 | 1.5 | 1.1 |
| 3701 | 121b02   | AV636804 | HC064d08  |   |   | 29.9  | 31.7  | 23.2  | 1.0 | 0.2 | 1.5 | 0.8 |
| 3702 | 172b05   | BP098228 | MXL089f11 |   |   | 5.9   | 6.5   | 4.8   | 2.1 | 1.6 | 1.5 | 0.5 |
| 3703 | 116e04   | AV392758 | CM099h01  |   |   | 38.3  | 54.7  | 35.8  | 1.4 | 0.1 | 1.5 | 0.1 |
| 3704 | 146a02   | AV626936 | LCL018d10 |   |   | 10.6  | 12.5  | 8.1   | 1.2 | 0.4 | 1.5 | 0.3 |
| 3705 | 123b09   | AV639344 | HC098b09  |   |   | 13.3  | 21.2  | 14.4  | 1.6 | 0.3 | 1.5 | 0.5 |
| 3706 | 008e11   | AV388655 | CM071g09  |   |   | 32.6  | 41.4  | 30.5  | 1.2 | 0.3 | 1.5 | 1.1 |
| 3707 | 132e07   | AV644716 | HCL092g06 |   |   | 112.2 | 106.8 | 76.8  | 1.0 | 0.3 | 1.5 | 0.7 |
| 3708 | 101a06   | AV393309 | CL01d03   |   |   | 5.5   | 6.2   | 4.1   | 1.2 | 0.4 | 1.5 | 0.3 |
| 3709 | 105g07   | AV396774 | CL69b08   |   |   | 8.1   | 8.3   | 6.2   | 1.1 | 0.4 | 1.5 | 0.8 |
| 3710 | 145h06   | AV626888 | LCL017d12 |   |   | 10.4  | 15.4  | 10.2  | 1.5 | 0.1 | 1.5 | 0.2 |
| 3711 | 139a01   | BP383800 | LC053h04  |   |   | 62.7  | 94.2  | 66.9  | 1.5 | 0.2 | 1.5 | 0.8 |
| 3712 | 135h05   | AV620321 | LC020e07  |   |   | 18.2  | 25.1  | 16.4  | 1.4 | 0.2 | 1.5 | 0.4 |
| 3713 | 148a01   | AV627771 | LCL031g09 |   |   | 70.8  | 79.9  | 54.2  | 1.1 | 0.1 | 1.5 | 0.6 |
| 3714 | 102b05   | AV394192 | CL19c12   |   |   | 31.1  | 31.5  | 20.6  | 1.0 | 0.2 | 1.5 | 0.1 |
| 3715 | 032d08   | BP093242 | MXL005e07 |   |   | 14.5  | 15.3  | 11.0  | 1.1 | 0.1 | 1.5 | 0.6 |
| 3716 | 138b04   | AV622098 | LC045a04  |   |   | 52.2  | 54.7  | 39.8  | 1.0 | 0.2 | 1.5 | 0.8 |
| 3717 | 109d09   | AV387569 | CM026f01  |   |   | 13.4  | 19.6  | 13.2  | 1.4 | 0.4 | 1.5 | 0.7 |
| 3718 | 165f09   | BP095306 | MXL039f07 |   |   | 96.3  | 122.9 | 89.0  | 1.3 | 0.3 | 1.5 | 0.6 |
| 3719 | 170e06   | BP097453 | MXL076a01 |   |   | 205.2 | 266.1 | 204.5 | 1.2 | 0.5 | 1.5 | 1.2 |
| 3720 | 132c12   | AV644662 | HCL091h04 |   |   | 9.1   | 12.8  | 8.5   | 1.4 | 0.3 | 1.5 | 0.3 |
| 3721 | 138c08   | BP383794 | LC046d06  |   |   | 40.0  | 41.5  | 26.8  | 1.0 | 0.1 | 1.5 | 0.3 |
| 3722 | 165b06   | BP095103 | MXL035h05 |   |   | 6.7   | 11.4  | 9.0   | 1.7 | 0.1 | 1.5 | 0.8 |
| 3723 | 007a10   | AV391031 | CM050b06  |   |   | 9.0   | 13.6  | 9.2   | 1.6 | 0.6 | 1.5 | 0.5 |
| 3724 | 132e12   | AV644739 | HCL093b06 |   |   | 5.0   | 5.4   | 3.8   | 1.1 | 0.4 | 1.5 | 0.5 |
| 3725 | 156f01   | BP086216 | MX004c09  |   |   | 159.7 | 181.9 | 116.6 | 1.2 | 0.1 | 1.5 | 0.4 |
| 3726 | 141b11   | AV624340 | LC076d07  |   |   | 17.1  | 19.8  | 13.1  | 1.2 | 0.1 | 1.5 | 0.4 |
| 3727 | 011e09   | AV635115 | HC042a09  |   |   | 20.3  | 23.0  | 16.0  | 1.2 | 0.3 | 1.5 | 0.5 |
| 3728 | 013d04   | AV638603 | HC088d10  |   |   | 111.4 | 173.4 | 123.9 | 1.6 | 0.1 | 1.5 | 0.5 |
| 3729 | 139b01   | AV622834 | LC055c05  |   |   | 10.4  | 8.5   | 5.6   | 0.8 | 0.2 | 1.5 | 0.3 |
| 3730 | 107a11   | AV386804 | CM007a06  |   |   | 3.6   | 5.0   | 3.6   | 1.5 | 0.4 | 1.5 | 0.7 |
| 3731 | 164g03   | BP094891 | MXL031g09 |   |   | 9.4   | 15.4  | 11.1  | 1.8 | 1.3 | 1.5 | 1.0 |
| 3732 | 031d01   | BP086786 | MX016g06  |   |   | 6.1   | 6.2   | 4.5   | 1.0 | 0.1 | 1.5 | 0.6 |
| 3733 | 165a01   | BP095007 | MXL034c11 |   |   | 8.1   | 8.9   | 7.2   | 1.2 | 0.5 | 1.5 | 0.8 |
| 3734 | 015h05   | AV641492 | HCL034f07 |   |   | 5.8   | 5.1   | 4.1   | 0.9 | 0.3 | 1.5 | 0.9 |
| 3735 | 024f01   | AV626663 | LCL013b12 |   |   | 4.6   | 6.4   | 5.1   | 1.4 | 0.4 | 1.5 | 0.8 |
| 3736 | 027g02   | AV629388 | LCL057g08 |   |   | 9.6   | 8.0   | 6.1   | 0.8 | 0.1 | 1.5 | 0.7 |
| 3737 | 133e02   | AV645069 | HCL097g06 |   |   | 92.0  | 94.8  | 74.2  | 1.0 | 0.1 | 1.5 | 0.9 |
| 3738 | 119a03   | AV634489 | HC034a10  |   |   | 79.9  | 77.4  | 50.8  | 1.0 | 0.2 | 1.5 | 0.3 |
| 3739 | 122f05   | AV638634 | HC088g11  |   |   | 8.5   | 8.5   | 5.6   | 1.0 | 0.2 | 1.5 | 0.3 |
| 3740 | 016a10   | AV641646 | HCL038a05 |   |   | 6.6   | 10.5  | 8.2   | 1.8 | 1.1 | 1.5 | 1.0 |
| 3741 | 022e01   | AV623878 | LC069h10  |   |   | 58.8  | 67.5  | 44.2  | 1.2 | 0.0 | 1.5 | 0.2 |
| 3742 | 121f01</ |          |           |   |   |       |       |       |     |     |     |     |

|      | A      | B        | C         | D | E | F     | G     | H     | I    | J   | K   | L   |
|------|--------|----------|-----------|---|---|-------|-------|-------|------|-----|-----|-----|
| 3743 | 165b10 | BP095111 | MXL036a02 |   |   | 6.1   | 7.4   | 5.8   | 1.2  | 0.2 | 1.5 | 0.7 |
| 3744 | 105h02 | AV396842 | CL70a02   |   |   | 10.8  | 24.4  | 16.1  | 2.4  | 1.0 | 1.5 | 0.1 |
| 3745 | 019d07 | BP383778 | LC014b10  |   |   | 6.1   | 6.5   | 5.1   | 1.0  | 0.3 | 1.5 | 1.0 |
| 3746 | 023a10 | AV624617 | LC080c06  |   |   | 16.2  | 25.0  | 17.1  | 1.5  | 0.1 | 1.5 | 0.3 |
| 3747 | 118d01 | AV633708 | HC024c05  |   |   | 18.8  | 35.2  | 23.8  | 1.9  | 0.1 | 1.5 | 0.2 |
| 3748 | 025d02 | AV627293 | LCL024e06 |   |   | 8.9   | 10.7  | 7.5   | 1.3  | 0.3 | 1.5 | 0.4 |
| 3749 | 105e08 | AV396574 | CL65d04   |   |   | 10.4  | 13.6  | 9.0   | 1.3  | 0.2 | 1.5 | 0.1 |
| 3750 | 117f05 | AV632913 | HC014c07  |   |   | 5.5   | 7.8   | 5.2   | 1.5  | 0.5 | 1.5 | 0.4 |
| 3751 | 016a01 | AV641574 | HCL036e12 |   |   | 3.5   | 7.9   | 5.3   | 2.5  | 1.3 | 1.5 | 0.5 |
| 3752 | 017f02 | AV643426 | HCL069e01 |   |   | 1.8   | 2.4   | 1.7   | 1.3  | 0.4 | 1.5 | 0.5 |
| 3753 | 120g02 | AV636376 | HC058f10  |   |   | 5.1   | 9.6   | 6.4   | 1.9  | 0.5 | 1.5 | 0.3 |
| 3754 | 161b01 | BP092951 | MXL001c10 |   |   | 51.4  | 48.2  | 36.5  | 0.9  | 0.2 | 1.5 | 0.8 |
| 3755 | 146c12 | AV627069 | LCL020f01 |   |   | 10.8  | 20.2  | 13.4  | 1.9  | 0.7 | 1.5 | 0.3 |
| 3756 | 003c02 | AV396236 | CL58b10   |   |   | 5.9   | 4.2   | 3.1   | 1.1  | 0.7 | 1.5 | 0.6 |
| 3757 | 109e02 | AV387593 | CM027a04  |   |   | 14.3  | 17.1  | 11.4  | 1.2  | 0.2 | 1.5 | 0.2 |
| 3758 | 013e05 | AV638811 | HC091b04  |   |   | 4.2   | 8.5   | 5.8   | 1.9  | 0.9 | 1.5 | 0.9 |
| 3759 | 146e11 | AV627151 | LCL021h07 |   |   | 11.2  | 44.7  | 30.3  | 4.0  | 0.3 | 1.5 | 0.2 |
| 3760 | 120f05 | AV636239 | HC056h07  |   |   | 181.0 | 176.6 | 128.4 | 1.0  | 0.2 | 1.5 | 0.6 |
| 3761 | 017f06 | AV643498 | HCL070g01 |   |   | 16.0  | 17.9  | 11.9  | 1.2  | 0.4 | 1.5 | 0.1 |
| 3762 | 110b08 | AV388952 | CM033h01  |   |   | 68.5  | 72.0  | 52.3  | 1.1  | 0.3 | 1.5 | 0.6 |
| 3763 | 020c01 | AV620833 | LC027d12  |   |   | 14.9  | 15.1  | 10.6  | 1.0  | 0.2 | 1.5 | 0.6 |
| 3764 | 106e05 | AV386520 | CM001b05  |   |   | 8.6   | 11.6  | 7.8   | 1.4  | 0.2 | 1.5 | 0.2 |
| 3765 | 122c03 | AV637967 | HC080a08  |   |   | 24.1  | 28.8  | 20.3  | 1.2  | 0.6 | 1.5 | 1.0 |
| 3766 | 123g06 | AV639773 | HCL004g10 |   |   | 12.1  | 16.4  | 11.3  | 1.3  | 0.3 | 1.5 | 0.7 |
| 3767 | 140d08 | AV623828 | LC069b10  |   |   | 14.8  | 14.7  | 10.7  | 1.0  | 0.2 | 1.5 | 0.7 |
| 3768 | 115a01 | AV390220 | CM082e12  |   |   | 6.6   | 10.6  | 7.1   | 1.6  | 0.6 | 1.5 | 0.6 |
| 3769 | 103g04 | AV395442 | CL41e06   |   |   | 39.4  | 33.8  | 23.4  | 0.9  | 0.4 | 1.5 | 0.7 |
| 3770 | 026a11 | AV628070 | LCL036c06 |   |   | 9.3   | 9.0   | 6.3   | 1.0  | 0.2 | 1.5 | 0.6 |
| 3771 | 137a07 | AV621176 | LC032c09  |   |   | 7.1   | 4.6   | 3.2   | 0.7  | 0.2 | 1.5 | 0.3 |
| 3772 | 168b09 | BP096340 | MXL057a12 |   |   | 774.6 | 571.6 | 598.1 | 0.7  | 0.4 | 1.5 | 1.4 |
| 3773 | 018g03 | AV619049 | LC003a12  |   |   | 5.0   | 8.0   | 5.4   | 1.8  | 0.7 | 1.5 | 0.3 |
| 3774 | 103b09 | AV394840 | CL32e09   |   |   | 12.8  | 14.4  | 9.7   | 1.1  | 0.3 | 1.5 | 0.7 |
| 3775 | 124h12 | AV640364 | HCL015a03 |   |   | 22.5  | 22.9  | 15.3  | 1.0  | 0.1 | 1.5 | 0.1 |
| 3776 | 118b11 | BP383690 | CM022c10  |   |   | 45.0  | 67.9  | 47.5  | 1.3  | 0.7 | 1.5 | 1.3 |
| 3777 | 143g11 | AV625977 | LC100f03  |   |   | 3.3   | 10.6  | 6.3   | 2.9  | 1.9 | 1.5 | 0.5 |
| 3778 | 120b04 | AV635761 | HC050e12  |   |   | 5.8   | 5.9   | 3.9   | 1.0  | 0.4 | 1.5 | 0.5 |
| 3779 | 025b07 | AV627142 | LCL021g07 |   |   | 8.7   | 18.9  | 13.0  | 2.2  | 0.2 | 1.5 | 0.2 |
| 3780 | 148b03 | AV627847 | LCL032h03 |   |   | 9.5   | 8.1   | 5.5   | 0.9  | 0.1 | 1.5 | 0.2 |
| 3781 | 123b01 | AV639272 | HC097c01  |   |   | 17.0  | 18.6  | 13.3  | 1.1  | 0.3 | 1.5 | 0.5 |
| 3782 | 116a12 | AV392627 | CM096c08  |   |   | 8.4   | 11.6  | 8.7   | 1.5  | 0.3 | 1.5 | 0.8 |
| 3783 | 161c02 | BP093000 | MXL002a05 |   |   | 41.8  | 55.2  | 37.5  | 1.3  | 0.5 | 1.5 | 0.6 |
| 3784 | 152c09 | AV629890 | LCL068d08 |   |   | 11.8  | 16.3  | 11.0  | 1.4  | 0.2 | 1.5 | 0.2 |
| 3785 | 026d09 | AV628340 | LCL040c11 |   |   | 18.3  | 39.8  | 26.4  | 2.2  | 0.9 | 1.5 | 0.5 |
| 3786 | 030g02 | BP086119 | MX002c05  |   |   | 11.0  | 12.4  | 8.6   | 1.1  | 0.1 | 1.5 | 0.4 |
| 3787 | 122c09 | AV638065 | HC081d10  |   |   | 18.7  | 27.9  | 18.7  | 1.6  | 0.4 | 1.5 | 0.3 |
| 3788 | 167f01 | BP096121 | MXL053a12 |   |   | 22.8  | 15.6  | 11.8  | 0.7  | 0.1 | 1.5 | 0.7 |
| 3789 | 146f04 | AV627166 | LCL022b02 |   |   | 7.1   | 85.0  | 59.5  | 11.9 | 4.5 | 1.5 | 0.2 |
| 3790 | 168b07 | BP096338 | MXL057a09 |   |   | 14.6  | 13.9  | 10.1  | 1.1  | 0.5 | 1.5 | 0.4 |
| 3791 | 145d03 | AV626653 | LCL013a11 |   |   | 7.3   | 13.2  | 8.8   | 1.8  | 0.2 | 1.5 | 0.1 |
| 3792 | 131f07 | AV644239 | HCL084e08 |   |   | 7.8   | 10.3  | 7.0   | 1.3  | 0.2 | 1.5 | 0.2 |
| 3793 | 025a07 | AV627024 | LCL020a02 |   |   | 1.9   | 1.8   | 1.5   | 1.1  | 0.6 | 1.5 | 1.1 |
| 3794 | 032f01 | BP093475 | MXL008h07 |   |   | 7.5   | 8.4   | 6.2   | 1.2  | 0.7 | 1.5 | 0.8 |
| 3795 | 123d11 | AV639584 | HCL001d07 |   |   | 14.5  | 20.4  | 14.0  | 1.4  | 0.2 | 1.5 | 0.7 |
| 3796 | 113d05 | AV393068 | CM067a06  |   |   | 16.2  | 25.3  | 16.9  | 1.6  | 0.4 | 1.5 | 0.2 |
| 3797 | 004h05 | AV387418 | CM015b11  |   |   | 24.4  | 16.3  | 10.2  | 0.9  | 0.4 | 1.5 | 1.0 |
| 3798 | 031f01 | BP087111 | MX025f04  |   |   | 19.5  | 25.0  | 17.3  | 1.4  | 0.4 | 1.5 | 0.3 |
| 3799 | 020f08 | AV621316 | LC034c07  |   |   | 22.1  | 30.4  | 21.9  | 1.4  | 0.1 | 1.5 | 0.4 |
| 3800 | 117d01 | AV632530 | HC009d03  |   |   | 3.6   | 7.3   | 5.0   | 2.1  | 0.4 | 1.5 | 0.3 |
| 3801 | 161c09 | BP093054 | MXL002g01 |   |   | 20.3  | 26.1  | 19.5  | 1.3  | 0.3 | 1.5 | 0.9 |
| 3802 | 143b02 | AV625578 | LC094h06  |   |   | 7.9   | 6.8   | 4.8   | 0.9  | 0.3 | 1.5 | 0.4 |
| 3803 | 117g07 | AV633100 | HC016g04  |   |   | 8.1   | 14.4  | 9.6   | 1.8  | 0.1 | 1.5 | 0.3 |
| 3804 | 125a05 | AV640395 | HCL015e08 |   |   | 14.9  | 23.8  | 16.1  | 1.6  | 0.2 | 1.5 | 0.2 |
| 3805 | 169f07 | BP097068 | MXL069e07 |   |   | 12.7  | 13.4  | 11.1  | 1.1  | 0.5 | 1.5 | 1.0 |
| 3806 | 108e11 | AV397439 | CM020e09  |   |   | 9.8   | 11.5  | 8.0   | 1.2  | 0.1 | 1.5 | 0.4 |
| 3807 | 017g12 | AV643775 | HCL075g08 |   |   | 8.6   | 8.3   | 7.5   | 0.9  | 0.4 | 1.5 | 1.1 |
| 3808 | 101f07 | AV393809 | CL12g07   |   |   | 38.8  | 48.4  | 33.2  | 1.3  | 0.1 | 1.5 | 0.3 |
| 3809 | 163f02 | BP094381 | MXL022c09 |   |   | 30.2  | 49.7  | 36.9  | 2.0  | 1.3 | 1.5 | 0.8 |
| 3810 | 103a04 | AV394766 | CL30g11   |   |   | 4.8   | 6.5   | 6.2   | 1.4  | 0.4 | 1.5 | 1.1 |
| 3811 | 031g07 | BP087346 | MX032e08  |   |   | 22.2  | 20.0  | 17.5  | 0.9  | 0.1 | 1.5 | 1.0 |
| 3812 | 024a12 | AV389652 | CM079b06  |   |   | 27.1  | 23.0  | 19.4  | 0.8  | 0.1 | 1.5 | 0.8 |
| 3813 | 116b11 | AV393059 | CM097f03  |   |   | 74.3  | 94.7  | 64.0  | 1.3  | 0.3 | 1.5 | 0.1 |
| 3814 | 161b08 | BP092975 | MXL001f05 |   |   | 8.3   | 12.9  | 9.2   | 1.6  | 0.4 | 1.5 | 0.5 |
| 3815 | 020c07 | AV620909 | LC028e01  |   |   | 5.8   | 29.9  | 19.5  | 5.0  | 2.1 | 1.5 | 0.2 |
| 3816 | 026d02 | AV628294 | LCL039f11 |   |   | 16.7  | 15.0  | 14.8  | 0.9  | 0.1 | 1.5 | 1.0 |
| 3817 | 165c10 | BP095156 | MXL036g10 |   |   | 16.4  | 23.3  | 15.6  | 1.4  | 0.2 | 1.5 | 0.4 |
| 3818 | 129e12 | AV642943 | HCL061a05 |   |   | 16.3  | 17.8  | 12.6  | 1.1  | 0.1 | 1.5 | 0.5 |
| 3819 | 115b03 | AV390351 | CM084e01  |   |   | 4.7   | 11.2  | 7.7   | 2.4  | 0.2 | 1.5 | 0.3 |
| 3820 | 134g11 | AV619539 | LC009f12  |   |   | 11.8  | 15.6  | 10.4  | 1.4  | 0.7 | 1.5 | 0.5 |
| 3821 | 136d02 | AV620644 | LC024h01  |   |   | 16.0  | 17.5  | 12.0  | 1.1  | 0.1 | 1.5 | 0.3 |
| 3822 | 013a01 | AV637721 | HC076f08  |   |   | 3.5   | 7.8   | 5.3   | 2.3  | 0.7 | 1.5 | 0.3 |
| 3823 | 128e10 | AV642436 | HCL051f10 |   |   | 952.6 | 821.7 | 545.8 | 0.9  | 0.2 | 1.5 | 0.4 |
| 3824 | 131e09 | AV644176 | HCL083d01 |   |   | 25.1  | 36.1  | 29.6  | 1.3  | 0.9 | 1.5 | 1.3 |
| 3825 | 122e07 | AV638497 | HC087b03  |   |   | 223.4 | 246.5 | 178.3 | 1.1  | 0.0 | 1.5 | 0.4 |
| 3826 | 136e01 | BP383785 | LC025h10  |   |   | 323.0 | 382.7 | 286.4 | 1.2  | 0.1 | 1.5 | 0.6 |
| 3827 | 135b01 | AV619686 | LC011g04  |   |   | 207.6 | 194.7 | 142.1 | 0.9  | 0.0 | 1.5 | 0.7 |
| 3828 | 116h02 | AV631962 | HC002c01  |   |   | 9.0   | 11.2  | 8.2   | 1.3  | 0.2 | 1.5 | 0.6 |
| 3829 | 002c08 | AV395124 | CL36d01   |   |   | 93.6  | 100.6 | 68.8  | 1.1  | 0.2 | 1.5 | 0.4 |
| 3830 | 104e07 | AV395929 | CL51b04   |   |   | 3.4   | 3.7   | 2.7   | 1.1  | 0.3 | 1.5 | 0.6 |
| 3831 | 111b08 | AV390212 | CM044c09  |   |   | 22.6  | 25.5  | 17.4  | 1.1  | 0.1 | 1.5 | 0.2 |
| 3832 | 031h11 | BP087553 | MX037c01  |   |   | 17.5  | 21.4  | 16.2  | 1.2  | 0.3 | 1.5 | 0.7 |
| 3833 | 139c05 | AV622932 | LC056f12  |   |   | 10.2  | 15.1  | 10.2  | 1.5  | 0.3 | 1.5 | 0.1 |
| 3834 | 021f03 | AV622623 | LC052a10  |   |   | 10.9  | 17.4  | 12.2  | 1.7  | 0.7 | 1.5 | 0.4 |
| 3835 | 167g06 | BP096187 | MXL054c05 |   |   | 22.4  | 71.3  | 48.0  | 3.6  | 2.6 | 1.5 | 0.9 |
| 3836 | 020a12 | AV620747 | LC026c10  |   |   | 9.7   | 9.5   | 6.6   | 1.0  | 0.3 | 1.5 | 0.3 |
| 3837 | 109e09 | AV387671 | CM027f01  |   |   | 11.6  | 17.0  | 12.0  | 1.5  | 0.1 | 1.5 | 0.4 |
| 3838 | 121g01 | AV637437 | HC073b06  |   |   | 8.4   | 10.2  | 7.0   | 1.2  | 0.2 | 1.5 | 0.3 |
| 3839 | 016h03 | AV642661 | HCL055f04 |   |   | 8.2   | 9.5   | 6.5   | 1.2  | 0.1 | 1.5 | 0.3 |
| 3840 | 121g02 | AV637457 | HC073d04  |   |   | 2.8   | 10.0  | 6.6   | 3.7  | 1.4 | 1.5 | 0.2 |
| 3841 | 108f09 | AV387974 | CM021c04  |   |   | 14.3  | 15.4  | 10.6  | 1.1  | 0.2 | 1.5 | 0.4 |
| 3842 | 165c04 | BP095135 | MXL036d09 |   |   | 6.6   | 11.4  | 9.3   | 1.7  | 0.6 | 1.5 | 0.9 |
| 3843 | 035h04 | BP097450 | MXL075h09 |   |   | 8.4   | 17.5  | 11.9  | 2.1  | 0.6 | 1.5 | 0.4 |
| 3844 | 138b11 | AV622129 | LC045e03  |   |   | 156.8 | 172.9 | 123.1 | 1.1  | 0.1 | 1.5 | 0.6 |
| 3845 | 141b04 | AV624313 | LC076a01  |   |   | 11.9  | 15.5  | 10.6  | 1.4  | 0.4 | 1.5 | 0.3 |
| 3846 | 137b07 | AV621230 | LC033a11  |   |   | 7.9   | 7.9   | 5.4   | 1.1  | 0.4 | 1.5 | 0.2 |
| 3847 | 123a09 | AV639234 | HC096f10  |   |   | 22.9  | 32.4  | 21.3  | 1.4  | 0.3 | 1.5 | 0.5 |
| 3848 | 133c03 | BP383771 | HCL096f09 |   |   | 170.0 | 212.0 | 141.5 | 1.1  | 0.6 | 1.5 | 1.1 |

|      | A      | B        | C         | D | E | F     | G     | H     | I   | J   | K   | L   |
|------|--------|----------|-----------|---|---|-------|-------|-------|-----|-----|-----|-----|
| 3850 | 018d01 | AV644440 | HCL088e12 |   |   | 9.6   | 14.1  | 12.1  | 1.5 | 0.1 | 1.5 | 0.8 |
| 3851 | 115f11 | AV391337 | CM090c09  |   |   | 42.0  | 34.3  | 24.2  | 0.8 | 0.3 | 1.5 | 0.6 |
| 3852 | 164d01 | BP094721 | MXL028b09 |   |   | 14.6  | 19.4  | 13.4  | 1.3 | 0.2 | 1.5 | 0.3 |
| 3853 | 014g02 | AV640346 | HCL014f06 |   |   | 14.6  | 19.2  | 13.1  | 1.4 | 0.4 | 1.5 | 0.2 |
| 3854 | 011a03 | AV633931 | HC027b03  |   |   | 15.2  | 22.7  | 15.5  | 1.6 | 0.4 | 1.5 | 0.2 |
| 3855 | 172b07 | BP098246 | MXL090a12 |   |   | 32.0  | 42.4  | 31.8  | 1.4 | 0.4 | 1.5 | 0.6 |
| 3856 | 032h05 | BP093703 | MXL012c07 |   |   | 16.3  | 22.3  | 16.5  | 1.4 | 0.1 | 1.5 | 0.6 |
| 3857 | 172b04 | BP098224 | MXL089f04 |   |   | 20.3  | 39.1  | 28.0  | 2.2 | 1.1 | 1.5 | 0.7 |
| 3858 | 145g06 | BP098829 | MXL099g11 |   |   | 31.7  | 31.5  | 23.2  | 1.0 | 0.1 | 1.5 | 0.8 |
| 3859 | 120g01 | AV636352 | HC058d07  |   |   | 82.7  | 81.2  | 69.7  | 1.0 | 0.3 | 1.5 | 0.8 |
| 3860 | 120g07 | AV636405 | HC059a10  |   |   | 46.7  | 72.9  | 52.7  | 1.6 | 0.1 | 1.5 | 0.6 |
| 3861 | 018h02 | AV619147 | LC004d09  |   |   | 5.6   | 10.7  | 7.4   | 2.3 | 0.8 | 1.5 | 0.8 |
| 3862 | 127h12 | AV642090 | HCL045d06 |   |   | 10.4  | 21.4  | 14.4  | 2.1 | 0.8 | 1.5 | 0.3 |
| 3863 | 144a10 | AV626117 | LCL002f05 |   |   | 573.8 | 520.6 | 458.2 | 0.9 | 0.2 | 1.5 | 1.1 |
| 3864 | 106h03 | AV386619 | CM003h10  |   |   | 6.5   | 5.8   | 3.9   | 1.0 | 0.2 | 1.5 | 0.4 |
| 3865 | 018g01 | AV619046 | LC003a08  |   |   | 2.5   | 6.8   | 4.7   | 3.2 | 1.4 | 1.5 | 0.6 |
| 3866 | 119c03 | AV634798 | HC038a06  |   |   | 220.4 | 261.8 | 200.9 | 1.2 | 0.1 | 1.5 | 0.6 |
| 3867 | 166c02 | BP095524 | MXL043b12 |   |   | 9.5   | 17.6  | 13.1  | 2.3 | 1.2 | 1.5 | 0.5 |
| 3868 | 157c08 | BP086774 | MX016d11  |   |   | 3.1   | 5.7   | 3.9   | 1.9 | 0.6 | 1.5 | 0.3 |
| 3869 | 102a10 | AV394048 | CL18h11   |   |   | 6.0   | 7.8   | 5.4   | 1.4 | 0.3 | 1.5 | 0.3 |
| 3870 | 137b03 | AV621221 | LC032h07  |   |   | 16.0  | 14.6  | 9.8   | 0.9 | 0.2 | 1.5 | 0.4 |
| 3871 | 113e06 | AV393214 | CM068d06  |   |   | 97.9  | 120.4 | 82.6  | 1.2 | 0.2 | 1.5 | 0.4 |
| 3872 | 130b10 | AV643293 | HCL067b02 |   |   | 10.9  | 14.1  | 10.0  | 1.3 | 0.2 | 1.5 | 0.3 |
| 3873 | 122h02 | AV638971 | HC093c05  |   |   | 33.1  | 34.5  | 24.5  | 1.1 | 0.1 | 1.5 | 0.4 |
| 3874 | 112a10 | AV391424 | CM054c03  |   |   | 6.5   | 7.5   | 5.7   | 1.2 | 0.3 | 1.5 | 0.8 |
| 3875 | 009b11 | AV390581 | CM085e12  |   |   | 31.8  | 33.0  | 22.6  | 1.1 | 0.1 | 1.5 | 0.1 |
| 3876 | 111f01 | AV390897 | CM048g11  |   |   | 12.9  | 14.4  | 11.0  | 1.1 | 0.3 | 1.5 | 0.7 |
| 3877 | 001b08 | AV393570 | CL05h04   |   |   | 5.6   | 5.7   | 4.1   | 1.0 | 0.2 | 1.5 | 0.4 |
| 3878 | 165e09 | BP095253 | MXL038h06 |   |   | 56.1  | 42.3  | 29.2  | 0.8 | 0.2 | 1.5 | 0.2 |
| 3879 | 163c04 | BP094160 | MXL018h09 |   |   | 20.7  | 31.1  | 24.3  | 1.9 | 1.1 | 1.5 | 0.7 |
| 3880 | 121d02 | AV637086 | HC068e06  |   |   | 11.8  | 9.7   | 7.3   | 0.8 | 0.2 | 1.5 | 0.7 |
| 3881 | 002h10 | AV395900 | CL51g06   |   |   | 0.5   | 1.1   | 0.9   | 4.4 | 5.6 | 1.5 | 1.3 |
| 3882 | 104d09 | AV395734 | CL50c05   |   |   | 35.3  | 53.4  | 36.6  | 1.5 | 0.3 | 1.5 | 0.2 |
| 3883 | 165g06 | BP095346 | MXL040c09 |   |   | 13.3  | 29.4  | 20.8  | 2.8 | 2.3 | 1.5 | 1.0 |
| 3884 | 136a11 | AV620449 | LC022c10  |   |   | 7.8   | 9.6   | 6.7   | 1.2 | 0.1 | 1.5 | 0.2 |
| 3885 | 147a03 | BP383839 | LCL025c01 |   |   | 11.4  | 10.7  | 7.4   | 0.9 | 0.2 | 1.5 | 0.2 |
| 3886 | 032h10 | BP093796 | MXL013h07 |   |   | 7.6   | 12.5  | 8.5   | 1.7 | 0.5 | 1.5 | 0.3 |
| 3887 | 122f08 | AV638678 | HC089d01  |   |   | 19.0  | 18.3  | 14.6  | 1.0 | 0.4 | 1.5 | 1.0 |
| 3888 | 166c03 | BP095526 | MXL043c02 |   |   | 11.7  | 15.9  | 12.4  | 2.0 | 1.6 | 1.5 | 0.8 |
| 3889 | 027a10 | AV628796 | LCL047c02 |   |   | 9.6   | 9.2   | 6.3   | 1.0 | 0.1 | 1.5 | 0.5 |
| 3890 | 018f10 | AV619038 | LC002h11  |   |   | 27.5  | 22.5  | 15.5  | 0.9 | 0.4 | 1.5 | 0.3 |
| 3891 | 117h09 | AV633261 | HC018f09  |   |   | 4.9   | 6.2   | 4.2   | 1.3 | 0.6 | 1.5 | 0.5 |
| 3892 | 139b05 | AV622857 | LC055f05  |   |   | 152.3 | 243.6 | 179.3 | 1.6 | 0.2 | 1.5 | 0.4 |
| 3893 | 102f04 | AV394554 | CL25b10   |   |   | 7.1   | 8.2   | 5.5   | 1.1 | 0.3 | 1.5 | 0.4 |
| 3894 | 119h10 | AV635617 | HC048f03  |   |   | 3.9   | 4.8   | 3.3   | 1.2 | 0.3 | 1.5 | 0.5 |
| 3895 | 115c09 | AV390167 | CM086d08  |   |   | 21.6  | 18.3  | 13.2  | 0.9 | 0.2 | 1.5 | 0.4 |
| 3896 | 170b07 | BP097281 | MXL073a01 |   |   | 5.9   | 8.4   | 6.4   | 1.7 | 1.1 | 1.5 | 0.8 |
| 3897 | 104c02 | AV395636 | CL46a11   |   |   | 4.8   | 10.2  | 6.9   | 2.1 | 0.2 | 1.5 | 0.2 |
| 3898 | 124d11 | BP098710 | MXL097g04 |   |   | 12.1  | 15.3  | 11.1  | 1.3 | 0.2 | 1.5 | 0.4 |
| 3899 | 003h02 | AV397248 | CL77f08   |   |   | 3.0   | 7.0   | 4.8   | 2.7 | 1.1 | 1.5 | 0.1 |
| 3900 | 140b03 | AV623607 | LC066b12  |   |   | 307.2 | 286.1 | 202.6 | 0.9 | 0.0 | 1.5 | 0.7 |
| 3901 | 155c03 | AV631345 | LCL092d05 |   |   | 20.2  | 20.5  | 16.7  | 1.1 | 0.5 | 1.5 | 0.8 |
| 3902 | 132g12 | AV644838 | HCL094e03 |   |   | 6.7   | 9.0   | 6.1   | 1.3 | 0.1 | 1.5 | 0.1 |
| 3903 | 143e03 | AV625747 | LC097c10  |   |   | 5.6   | 11.8  | 8.8   | 2.4 | 1.3 | 1.5 | 0.4 |
| 3904 | 141h07 | AV624809 | LC083a09  |   |   | 122.0 | 123.6 | 98.6  | 1.0 | 0.1 | 1.5 | 0.8 |
| 3905 | 139e05 | AV623130 | LC059c10  |   |   | 51.5  | 48.6  | 39.9  | 0.9 | 0.4 | 1.5 | 1.1 |
| 3906 | 142a12 | AV624903 | LC084c11  |   |   | 7.8   | 5.6   | 4.0   | 0.7 | 0.3 | 1.5 | 0.6 |
| 3907 | 036d08 | BP098241 | MXL090a02 |   |   | 15.4  | 17.6  | 12.9  | 1.1 | 0.2 | 1.5 | 0.5 |
| 3908 | 114e10 | AV388536 | CM078c06  |   |   | 16.4  | 17.4  | 11.9  | 1.1 | 0.3 | 1.5 | 0.3 |
| 3909 | 015a04 | AV640641 | HCL019f08 |   |   | 16.4  | 21.1  | 14.4  | 1.3 | 0.4 | 1.5 | 0.2 |
| 3910 | 169a06 | BP096791 | MXL064h11 |   |   | 6.9   | 8.1   | 6.0   | 1.2 | 0.2 | 1.5 | 0.5 |
| 3911 | 155e10 | AV631468 | LCL094e11 |   |   | 10.1  | 14.2  | 10.2  | 1.3 | 0.9 | 1.5 | 1.2 |
| 3912 | 160f01 | BP088834 | MX101f05  |   |   | 333.5 | 339.4 | 230.9 | 1.1 | 0.3 | 1.5 | 0.3 |
| 3913 | 014d03 | AV639989 | HCL008d05 |   |   | 5.8   | 17.3  | 12.4  | 3.0 | 1.7 | 1.5 | 0.9 |
| 3914 | 102h11 | AV394647 | CL29g12   |   |   | 4.0   | 3.9   | 2.7   | 1.0 | 0.2 | 1.5 | 0.2 |
| 3915 | 143g03 | AV625928 | LC099h10  |   |   | 9.7   | 13.8  | 9.6   | 1.5 | 0.2 | 1.5 | 0.4 |
| 3916 | 111e11 | AV390877 | CM048f03  |   |   | 13.3  | 15.4  | 10.8  | 1.2 | 0.2 | 1.5 | 0.2 |
| 3917 | 122b06 | AV637894 | HC079a07  |   |   | 11.3  | 14.7  | 11.5  | 1.3 | 0.1 | 1.5 | 0.8 |
| 3918 | 120f01 | AV636160 | HC055h10  |   |   | 159.2 | 182.1 | 133.5 | 1.1 | 0.1 | 1.5 | 0.5 |
| 3919 | 119c10 | AV634857 | HC038h02  |   |   | 8.9   | 9.0   | 6.7   | 1.0 | 0.2 | 1.5 | 0.6 |
| 3920 | 143e07 | AV625788 | LC097h02  |   |   | 5.7   | 8.8   | 6.2   | 1.6 | 0.6 | 1.5 | 0.4 |
| 3921 | 138h02 | AV622607 | LC051h03  |   |   | 20.7  | 37.9  | 27.7  | 1.8 | 0.1 | 1.5 | 0.5 |
| 3922 | 119a09 | AV634562 | HC035a02  |   |   | 77.6  | 89.7  | 70.2  | 1.2 | 0.0 | 1.5 | 0.6 |
| 3923 | 126d04 | AV641230 | HCL030b08 |   |   | 11.5  | 12.4  | 8.9   | 1.1 | 0.1 | 1.5 | 0.3 |
| 3924 | 121e12 | AV637293 | HC071c04  |   |   | 7.3   | 9.7   | 6.8   | 1.3 | 0.3 | 1.5 | 0.5 |
| 3925 | 171b09 | BP097765 | MXL081a03 |   |   | 25.3  | 26.3  | 22.6  | 1.1 | 0.5 | 1.5 | 1.0 |
| 3926 | 005g11 | AV388445 | CM029f07  |   |   | 14.9  | 16.3  | 11.3  | 1.2 | 0.4 | 1.5 | 0.2 |
| 3927 | 129h07 | AV643122 | HCL064b06 |   |   | 53.6  | 59.4  | 40.8  | 1.1 | 0.1 | 1.5 | 0.1 |
| 3928 | 122b03 | AV637880 | HC078h01  |   |   | 16.5  | 19.2  | 13.6  | 1.3 | 0.3 | 1.5 | 0.4 |
| 3929 | 101d12 | AV393546 | CL08d11   |   |   | 8.7   | 10.5  | 8.4   | 1.2 | 0.3 | 1.5 | 0.7 |
| 3930 | 134e05 | AV619351 | LC007b02  |   |   | 8.3   | 8.8   | 6.1   | 1.1 | 0.5 | 1.5 | 0.3 |
| 3931 | 010h03 | AV633635 | HC023c06  |   |   | 13.2  | 15.5  | 10.8  | 1.3 | 0.3 | 1.5 | 0.2 |
| 3932 | 115c03 | AV390641 | CM085f10  |   |   | 47.9  | 70.6  | 49.8  | 1.5 | 0.3 | 1.5 | 0.5 |
| 3933 | 132d12 | AV644697 | HCL092d11 |   |   | 140.3 | 166.5 | 122.3 | 1.2 | 0.1 | 1.5 | 0.3 |
| 3934 | 026f03 | AV628442 | LCL041h09 |   |   | 12.8  | 17.0  | 13.1  | 1.3 | 0.1 | 1.5 | 0.6 |
| 3935 | 126a09 | AV640994 | HCL025h05 |   |   | 15.3  | 18.9  | 13.7  | 1.2 | 0.1 | 1.5 | 0.4 |
| 3936 | 006g12 | AV390541 | CM046h02  |   |   | 12.4  | 12.2  | 8.9   | 1.0 | 0.5 | 1.5 | 0.9 |
| 3937 | 006a06 | AV388851 | CM033c07  |   |   | 23.1  | 29.0  | 22.3  | 1.2 | 0.1 | 1.5 | 0.9 |
| 3938 | 121d04 | AV637103 | HC068g06  |   |   | 12.9  | 12.8  | 8.8   | 1.0 | 0.1 | 1.5 | 0.1 |
| 3939 | 111a09 | AV390171 | CM042h06  |   |   | 4.0   | 5.0   | 3.7   | 1.3 | 0.5 | 1.5 | 0.5 |
| 3940 | 140a09 | AV623572 | LC065g08  |   |   | 11.3  | 7.8   | 5.4   | 0.7 | 0.1 | 1.5 | 0.4 |
| 3941 | 135b08 | AV619754 | LC012f09  |   |   | 10.7  | 10.5  | 8.5   | 1.0 | 0.1 | 1.5 | 0.8 |
| 3942 | 172c03 | BP098290 | MXL090h10 |   |   | 8.1   | 11.0  | 8.6   | 2.1 | 1.4 | 1.4 | 0.6 |
| 3943 | 145f11 | AV626809 | LCL015g11 |   |   | 10.5  | 32.5  | 23.8  | 3.2 | 0.4 | 1.4 | 0.3 |
| 3944 | 107e10 | AV387011 | CM010g07  |   |   | 9.3   | 12.4  | 8.6   | 1.3 | 0.2 | 1.4 | 0.3 |
| 3945 | 123f03 | AV639657 | HCL002e09 |   |   | 18.9  | 29.9  | 21.1  | 1.6 | 0.5 | 1.4 | 0.6 |
| 3946 | 144h01 | AV626413 | LCL008f11 |   |   | 9.2   | 8.5   | 6.6   | 0.9 | 0.1 | 1.4 | 0.7 |
| 3947 | 160d12 | BP088629 | MX065d01  |   |   | 77.5  | 66.1  | 51.6  | 0.8 | 0.3 | 1.4 | 1.1 |
| 3948 | 119b04 | AV634636 | HC035h04  |   |   | 73.5  | 68.7  | 60.1  | 0.9 | 0.1 | 1.4 | 0.8 |
| 3949 | 152b11 | AV629834 | LCL067b09 |   |   | 5.4   | 5.8   | 4.1   | 1.1 | 0.2 | 1.4 | 0.4 |
| 3950 | 109a06 | AV387759 | CM023d10  |   |   | 5.0   | 5.5   | 3.9   | 1.1 | 0.2 | 1.4 | 0.2 |
| 3951 | 146f09 | AV627177 | LCL022c06 |   |   | 119.9 | 113.6 | 80.3  | 1.0 | 0.1 | 1.4 | 0.6 |
| 3952 | 163b07 | BP094102 | MXL018b11 |   |   | 14.0  | 12.4  | 9.9   | 0.9 | 0.4 | 1.4 | 0.8 |
| 3953 | 153b06 | AV630357 | LCL077g05 |   |   | 18.0  | 21.7  | 16.0  | 1.2 | 0.2 | 1.4 | 0.6 |
| 3954 | 028e02 | AV630030 | LCL071e10 |   |   | 1.9   | 2.7   | 2.1   | 1.4 | 0.2 | 1.4 | 0.5 |
| 3955 | 110a06 | AV388770 | CM032c07  |   |   | 8.0   | 11.8  | 8.4   | 1.5 | 0.2 | 1.4 | 0.5 |

|      | A        | B        | C         | D | E | F     | G     | H     | I   | J   | K   | L   |
|------|----------|----------|-----------|---|---|-------|-------|-------|-----|-----|-----|-----|
| 3957 | 161a02   | BP089458 | MX207g01  |   |   | 49.5  | 40.9  | 35.7  | 0.9 | 0.5 | 1.4 | 1.1 |
| 3958 | 119a02   | AV634483 | HC034a02  |   |   | 7.5   | 9.5   | 6.9   | 1.3 | 0.1 | 1.4 | 0.5 |
| 3959 | 025f02   | AV627587 | LCL029a09 |   |   | 23.8  | 19.2  | 21.4  | 0.8 | 0.1 | 1.4 | 1.0 |
| 3960 | 113a07   | AV392674 | CM063b09  |   |   | 14.2  | 18.3  | 14.5  | 1.3 | 0.1 | 1.4 | 0.6 |
| 3961 | 112f06   | AV392116 | CM058d03  |   |   | 13.6  | 16.2  | 11.2  | 1.2 | 0.4 | 1.4 | 0.2 |
| 3962 | 133c09   | AV645001 | HCL096h01 |   |   | 26.3  | 25.0  | 19.0  | 1.0 | 0.2 | 1.4 | 0.6 |
| 3963 | 027b12   | AV628984 | LCL050a01 |   |   | 9.6   | 13.4  | 9.5   | 1.4 | 0.2 | 1.4 | 0.2 |
| 3964 | 170h10   | BP097663 | MXL079c04 |   |   | 18.9  | 39.6  | 27.9  | 2.1 | 1.6 | 1.4 | 1.1 |
| 3965 | 121c12   | AV637031 | HC067f10  |   |   | 12.1  | 15.5  | 10.6  | 1.3 | 0.3 | 1.4 | 0.3 |
| 3966 | 147d09   | AV627541 | LCL028c02 |   |   | 36.8  | 36.3  | 29.5  | 1.0 | 0.3 | 1.4 | 0.7 |
| 3967 | 166g03   | BP095740 | MXL046f07 |   |   | 11.2  | 10.9  | 9.2   | 0.9 | 0.6 | 1.4 | 1.2 |
| 3968 | 106a09   | AV396471 | CL74c09   |   |   | 4.4   | 5.5   | 4.1   | 1.2 | 0.2 | 1.4 | 0.7 |
| 3969 | 167c11   | BP095983 | MXL050e12 |   |   | 8.2   | 8.9   | 7.2   | 1.3 | 0.6 | 1.4 | 0.7 |
| 3970 | 113c06   | AV392896 | CM065b07  |   |   | 14.0  | 13.2  | 9.2   | 1.0 | 0.2 | 1.4 | 0.3 |
| 3971 | 165c12   | BP095166 | MXL037a01 |   |   | 9.6   | 16.1  | 13.0  | 1.7 | 0.5 | 1.4 | 0.8 |
| 3972 | 019a03   | AV619378 | LCL007e09 |   |   | 6.2   | 4.8   | 4.0   | 0.9 | 0.3 | 1.4 | 0.7 |
| 3973 | 114d01   | AV389292 | CM075g03  |   |   | 27.9  | 51.2  | 41.8  | 1.9 | 0.3 | 1.4 | 0.6 |
| 3974 | 125e06   | AV640672 | HCL020c12 |   |   | 100.9 | 120.0 | 82.5  | 1.1 | 0.6 | 1.4 | 1.1 |
| 3975 | 136c01   | AV620585 | LCL024a05 |   |   | 12.0  | 15.4  | 12.4  | 1.3 | 0.8 | 1.4 | 1.1 |
| 3976 | 108h01   | AV387865 | CM022b11  |   |   | 5.9   | 7.2   | 5.1   | 1.3 | 0.2 | 1.4 | 0.4 |
| 3977 | 032f12   | BP093566 | MXL010c01 |   |   | 4.5   | 6.1   | 4.3   | 1.4 | 0.2 | 1.4 | 0.3 |
| 3978 | 107h10   | AV387407 | CM014b03  |   |   | 17.0  | 22.7  | 15.6  | 1.4 | 0.2 | 1.4 | 0.3 |
| 3979 | 102f03   | AV394419 | CL24h09   |   |   | 10.1  | 9.0   | 6.2   | 0.9 | 0.3 | 1.4 | 0.1 |
| 3980 | 150d03   | AV628957 | LCL049e08 |   |   | 22.5  | 48.5  | 33.5  | 2.2 | 0.2 | 1.4 | 0.1 |
| 3981 | 132h05   | AV644858 | HCL094g05 |   |   | 17.1  | 16.1  | 11.3  | 1.0 | 0.1 | 1.4 | 0.5 |
| 3982 | 102a12   | AV394064 | CL18e09   |   |   | 8.5   | 13.0  | 9.1   | 1.6 | 0.3 | 1.4 | 0.4 |
| 3983 | 014b12   | AV639842 | HCL006a04 |   |   | 7.8   | 10.3  | 8.2   | 1.5 | 0.8 | 1.4 | 0.8 |
| 3984 | 134f06   | AV619445 | LCL008d12 |   |   | 16.2  | 20.0  | 15.2  | 1.2 | 0.1 | 1.4 | 0.6 |
| 3985 | 158c06   | BP087594 | MXO38d01  |   |   | 13.0  | 15.5  | 12.7  | 1.3 | 0.4 | 1.4 | 0.8 |
| 3986 | 030a03   | AV631274 | LCL091c04 |   |   | 2.4   | 2.2   | 1.7   | 0.9 | 0.0 | 1.4 | 0.6 |
| 3987 | 015d11   | AV641105 | HCL027h03 |   |   | 94.5  | 105.8 | 79.9  | 1.0 | 0.5 | 1.4 | 1.2 |
| 3988 | 034g07   | BP096221 | MXL054g12 |   |   | 15.9  | 25.6  | 19.9  | 1.8 | 0.6 | 1.4 | 0.5 |
| 3989 | 162c04   | BP093566 | MXL010e09 |   |   | 17.7  | 27.6  | 19.4  | 1.6 | 0.6 | 1.4 | 0.5 |
| 3990 | 005h03   | AV388587 | CM030c05  |   |   | 7.2   | 8.6   | 6.3   | 1.3 | 0.5 | 1.4 | 0.4 |
| 3991 | 036c08   | BP098051 | MXL086a07 |   |   | 6.6   | 12.1  | 8.7   | 1.9 | 0.3 | 1.4 | 0.3 |
| 3992 | 005f07   | AV387643 | CM027e04  |   |   | 22.7  | 21.6  | 16.9  | 1.0 | 0.1 | 1.4 | 0.6 |
| 3993 | 120c05   | AV635915 | HC052i05  |   |   | 9.9   | 13.2  | 8.9   | 1.3 | 0.7 | 1.4 | 0.9 |
| 3994 | 139d12   | AV623103 | LCL059a02 |   |   | 5.4   | 7.9   | 5.5   | 1.5 | 0.2 | 1.4 | 0.0 |
| 3995 | 119d09   | AV635037 | HC041b03  |   |   | 90.1  | 78.5  | 62.9  | 0.9 | 0.1 | 1.4 | 0.7 |
| 3996 | 106h10   | AV386645 | CM004d05  |   |   | 10.0  | 12.7  | 8.9   | 1.3 | 0.2 | 1.4 | 0.2 |
| 3997 | 140a06   | AV623547 | LCL065e02 |   |   | 11.5  | 10.2  | 7.1   | 0.9 | 0.3 | 1.4 | 0.1 |
| 3998 | 017a03   | AV642747 | HCL057b06 |   |   | 3.1   | 3.7   | 2.7   | 1.3 | 0.7 | 1.4 | 0.3 |
| 3999 | 117g02   | AV633055 | HC016b05  |   |   | 30.4  | 29.3  | 20.9  | 1.0 | 0.1 | 1.4 | 0.5 |
| 4000 | 155e03   | AV631448 | LCL094b02 |   |   | 12.4  | 17.8  | 12.4  | 1.5 | 0.2 | 1.4 | 0.1 |
| 4001 | 138a03   | AV622026 | LCL044b02 |   |   | 62.0  | 62.9  | 44.8  | 1.0 | 0.1 | 1.4 | 0.9 |
| 4002 | 010a10   | AV632146 | HC004e06  |   |   | 7.1   | 7.4   | 5.1   | 1.0 | 0.1 | 1.4 | 0.2 |
| 4003 | 153e01   | AV630490 | LCL079f11 |   |   | 10.3  | 11.5  | 8.6   | 1.1 | 0.2 | 1.4 | 0.4 |
| 4004 | 109f07   | AV388305 | CM028e08  |   |   | 48.6  | 54.3  | 38.0  | 1.1 | 0.3 | 1.4 | 0.1 |
| 4005 | 137c05   | AV621390 | LCL035d05 |   |   | 24.0  | 33.0  | 23.0  | 1.5 | 0.3 | 1.4 | 0.1 |
| 4006 | 025a12   | AV627072 | LCL020f08 |   |   | 15.0  | 10.7  | 11.4  | 0.7 | 0.1 | 1.4 | 1.2 |
| 4007 | 157f09   | BP087115 | MXO25g02  |   |   | 15.0  | 23.7  | 16.5  | 1.6 | 0.2 | 1.4 | 0.1 |
| 4008 | 170b09   | BP097294 | MXL073b09 |   |   | 10.5  | 10.2  | 8.1   | 1.0 | 0.2 | 1.4 | 0.5 |
| 4009 | 116b12   | AV393049 | CM097f11  |   |   | 46.2  | 70.0  | 50.9  | 1.5 | 0.2 | 1.4 | 0.5 |
| 4010 | 032h06   | BP093740 | MXL012h04 |   |   | 5.1   | 5.8   | 4.4   | 1.2 | 0.1 | 1.4 | 0.6 |
| 4011 | 119g10   | AV635456 | HC046e08  |   |   | 231.8 | 256.8 | 182.8 | 1.1 | 0.3 | 1.4 | 0.2 |
| 4012 | 113e07   | AV393217 | CM068e04  |   |   | 18.5  | 15.1  | 10.6  | 0.8 | 0.2 | 1.4 | 0.0 |
| 4013 | 126h04   | AV641540 | HCL035g12 |   |   | 9.1   | 9.5   | 7.0   | 1.0 | 0.2 | 1.4 | 0.5 |
| 4014 | 107h01   | AV387093 | CM013c11  |   |   | 5.6   | 8.2   | 5.8   | 1.5 | 0.3 | 1.4 | 0.3 |
| 4015 | 161c10   | BP093064 | MXL002h04 |   |   | 16.2  | 18.7  | 13.6  | 1.1 | 0.1 | 1.4 | 0.7 |
| 4016 | 137d04   | AV621515 | LCL037b06 |   |   | 9.5   | 10.7  | 7.6   | 1.3 | 0.5 | 1.4 | 0.2 |
| 4017 | 133g02   | BP098886 | MXL100g12 |   |   | 13.3  | 14.0  | 10.1  | 1.1 | 0.1 | 1.4 | 0.3 |
| 4018 | 016h02   | AV642649 | HCL055d02 |   |   | 4.5   | 9.5   | 6.7   | 3.2 | 2.0 | 1.4 | 0.3 |
| 4019 | 033e04   | BP094459 | MXL023d03 |   |   | 74.0  | 91.9  | 63.0  | 1.2 | 0.1 | 1.4 | 0.4 |
| 4020 | 016e02   | AV642259 | HCL048e08 |   |   | 9.0   | 12.0  | 8.5   | 1.3 | 0.1 | 1.4 | 0.3 |
| 4021 | 123h07   | AV639853 | HCL006b08 |   |   | 14.0  | 15.4  | 10.6  | 1.1 | 0.7 | 1.4 | 1.0 |
| 4022 | 034c01   | BP095482 | MXL042e11 |   |   | 6.9   | 6.2   | 4.4   | 0.9 | 0.2 | 1.4 | 0.2 |
| 4023 | 109b11   | AV388228 | CM024g10  |   |   | 2.7   | 2.8   | 2.5   | 1.1 | 0.3 | 1.4 | 0.8 |
| 4024 | 140a12   | AV623592 | LCL066a06 |   |   | 8.2   | 8.3   | 5.8   | 1.0 | 0.1 | 1.4 | 0.0 |
| 4025 | 111b10   | AV390263 | CM044f10  |   |   | 83.1  | 113.2 | 81.4  | 1.4 | 0.1 | 1.4 | 0.3 |
| 4026 | 170h05   | BP097630 | MXL078g03 |   |   | 5.2   | 5.8   | 8.3   | 0.9 | 0.6 | 1.4 | 1.6 |
| 4027 | 168h09   | BP096736 | MXL064a02 |   |   | 5.8   | 9.9   | 9.0   | 1.5 | 1.2 | 1.4 | 1.4 |
| 4028 | 007d03   | AV391515 | CM054h10  |   |   | 5.4   | 4.5   | 3.2   | 0.8 | 0.1 | 1.4 | 0.3 |
| 4029 | 172c12   | BP098337 | MXL091g05 |   |   | 12.4  | 11.7  | 8.6   | 0.9 | 0.1 | 1.4 | 0.3 |
| 4030 | 123e02   | AV639613 | HCL001h07 |   |   | 9.2   | 10.9  | 7.7   | 1.2 | 0.2 | 1.4 | 0.2 |
| 4031 | 029h06   | AV631203 | LCL090b10 |   |   | 25.9  | 36.8  | 25.1  | 1.4 | 0.5 | 1.4 | 0.2 |
| 4032 | 163c09   | BP094202 | MXL019e04 |   |   | 27.6  | 37.5  | 26.4  | 1.4 | 0.4 | 1.4 | 0.2 |
| 4033 | 139b06   | AV622859 | LCL055f07 |   |   | 28.1  | 21.5  | 19.2  | 0.8 | 0.4 | 1.4 | 1.0 |
| 4034 | 125a02   | AV640368 | HCL015a07 |   |   | 6.4   | 8.2   | 5.9   | 1.3 | 0.2 | 1.4 | 0.4 |
| 4035 | 028d02   | AV629875 | LCL068b01 |   |   | 4.1   | 4.0   | 4.6   | 1.0 | 0.1 | 1.4 | 1.5 |
| 4036 | 131d10   | BP383751 | HCL082a04 |   |   | 13.8  | 20.3  | 16.7  | 1.5 | 0.7 | 1.4 | 1.0 |
| 4037 | 107g12   | AV387054 | CM013b06  |   |   | 4.4   | 4.9   | 3.8   | 1.1 | 0.2 | 1.4 | 0.7 |
| 4038 | 168b10   | BP096363 | MXL057e08 |   |   | 17.4  | 15.9  | 12.6  | 1.0 | 0.3 | 1.4 | 0.6 |
| 4039 | 148a05   | AV627781 | LCL031h09 |   |   | 17.0  | 13.8  | 10.1  | 0.8 | 0.1 | 1.4 | 0.3 |
| 4040 | 111c01   | AV390322 | CM045b06  |   |   | 54.7  | 96.9  | 78.2  | 1.8 | 0.0 | 1.4 | 0.6 |
| 4041 | 115b11   | AV390639 | CM085c11  |   |   | 16.2  | 16.0  | 13.0  | 1.0 | 0.4 | 1.4 | 0.8 |
| 4042 | 142a04   | AV624851 | LCL083f01 |   |   | 11.3  | 8.1   | 5.8   | 0.7 | 0.1 | 1.4 | 0.4 |
| 4043 | 104h08   | AV396016 | CL55d10   |   |   | 133.0 | 138.8 | 97.3  | 1.2 | 0.3 | 1.4 | 0.0 |
| 4044 | 134c05   | AV619110 | LCL003h11 |   |   | 57.8  | 65.2  | 50.0  | 1.2 | 0.3 | 1.4 | 0.6 |
| 4045 | 014e12   | AV640145 | HCL011b11 |   |   | 6.0   | 4.6   | 3.9   | 0.7 | 0.3 | 1.4 | 1.2 |
| 4046 | 105h12   | AV396990 | CL73d12   |   |   | 6.9   | 6.2   | 4.4   | 0.9 | 0.2 | 1.4 | 0.3 |
| 4047 | 102f10   | AV394618 | CL26i09   |   |   | 56.8  | 44.1  | 30.0  | 0.7 | 0.2 | 1.4 | 0.6 |
| 4048 | 139d11   | AV623089 | LCL058g07 |   |   | 92.1  | 99.0  | 81.3  | 1.1 | 0.2 | 1.4 | 0.8 |
| 4049 | 119h06   | AV635592 | HC048c05  |   |   | 21.9  | 22.5  | 15.9  | 1.0 | 0.1 | 1.4 | 0.2 |
| 4050 | 146g05   | AV627226 | LCL023a05 |   |   | 19.1  | 16.2  | 13.2  | 0.8 | 0.1 | 1.4 | 0.7 |
| 4051 | 124a10   | AV639954 | HCL007h04 |   |   | 32.8  | 66.5  | 47.4  | 2.0 | 0.3 | 1.4 | 0.1 |
| 4052 | 148a02   | AV627778 | LCL031h06 |   |   | 14.9  | 14.2  | 10.3  | 1.0 | 0.1 | 1.4 | 0.4 |
| 4053 | 144a09   | AV626115 | LCL002f01 |   |   | 12.1  | 9.7   | 7.3   | 0.8 | 0.1 | 1.4 | 0.4 |
| 4054 | 142e04   | AV625204 | LCL089c03 |   |   | 10.2  | 10.8  | 7.6   | 1.1 | 0.2 | 1.4 | 0.2 |
| 4055 | 158a09   | BP087441 | MXO34f08  |   |   | 17.2  | 16.7  | 16.3  | 0.9 | 0.3 | 1.4 | 1.2 |
| 4056 | 156a07   | AV631682 | LCL098b05 |   |   | 9.8   | 16.7  | 11.8  | 1.7 | 0.5 | 1.4 | 0.1 |
| 4057 | 152f02   | AV630035 | LCL071f12 |   |   | 19.2  | 25.0  | 17.9  | 1.3 | 0.2 | 1.4 | 0.2 |
| 4058 | 107e05   | AV386997 | CM010c07  |   |   | 5.2   | 6.5   | 4.7   | 1.4 | 0.6 | 1.4 | 0.4 |
| 4059 | 113b08   | AV392837 | CM064f06  |   |   | 5.3   | 6.1   | 4.3   | 1.2 | 0.1 | 1.4 | 0.2 |
| 4060 | 108c09   | AV388147 | CM017g12  |   |   | 76.5  | 84.7  | 60.9  | 1.1 | 0.2 | 1.4 | 0.2 |
| 4061 | 118f09   | AV634048 | HC028e12  |   |   | 5.3   | 6.3   | 4.5   | 1.2 | 0.4 | 1.4 | 0.3 |
| 4062 | 136b06   | AV620499 | LCL022h12 |   |   | 18.0  | 21.4  | 17.5  | 1.2 | 0.1 | 1.4 | 0.6 |
| 4063 | 126d06</ |          |           |   |   |       |       |       |     |     |     |     |

|      | A      | B        | C         | D | E | F     | G     | H     | I   | J   | K   | L   |
|------|--------|----------|-----------|---|---|-------|-------|-------|-----|-----|-----|-----|
| 4064 | 028f05 | AV630181 | LCL074h11 |   |   | 10.1  | 13.6  | 9.0   | 1.3 | 0.4 | 1.4 | 0.5 |
| 4065 | 103d08 | AV395163 | CL36c12   |   |   | 12.3  | 16.4  | 11.7  | 1.6 | 0.8 | 1.4 | 0.3 |
| 4066 | 166e08 | BP095694 | MXL045h11 |   |   | 12.0  | 20.7  | 14.8  | 1.8 | 0.6 | 1.4 | 0.1 |
| 4067 | 140d09 | AV623830 | LC069b12  |   |   | 13.6  | 13.2  | 9.4   | 1.0 | 0.4 | 1.4 | 0.3 |
| 4068 | 104b04 | AV397767 | CL45a03   |   |   | 3.5   | 4.1   | 3.1   | 1.3 | 0.5 | 1.4 | 0.5 |
| 4069 | 126e12 | AV641350 | HCL032a11 |   |   | 9.2   | 9.4   | 6.9   | 1.0 | 0.2 | 1.4 | 0.5 |
| 4070 | 142h02 | AV625476 | LC093c02  |   |   | 11.0  | 11.3  | 8.1   | 1.1 | 0.3 | 1.4 | 0.2 |
| 4071 | 162c01 | BP093572 | MXL010d02 |   |   | 6.7   | 7.7   | 5.6   | 1.1 | 0.1 | 1.4 | 0.4 |
| 4072 | 121h09 | AV637683 | HC076b11  |   |   | 76.5  | 74.2  | 59.5  | 1.0 | 0.2 | 1.4 | 0.5 |
| 4073 | 113f12 | AV387731 | CM070a06  |   |   | 130.4 | 178.2 | 126.2 | 1.4 | 0.2 | 1.4 | 0.1 |
| 4074 | 132c11 | AV644656 | HCL091g10 |   |   | 6.2   | 5.7   | 4.1   | 0.9 | 0.2 | 1.4 | 0.1 |
| 4075 | 001h04 | AV394535 | CL25g03   |   |   | 4.3   | 4.5   | 3.3   | 1.4 | 1.0 | 1.4 | 0.4 |
| 4076 | 132b11 | AV644532 | HCL090b07 |   |   | 26.6  | 31.7  | 23.9  | 1.2 | 0.1 | 1.4 | 0.3 |
| 4077 | 123d12 | AV639594 | HCL001e10 |   |   | 32.0  | 51.6  | 36.3  | 1.6 | 0.4 | 1.4 | 0.2 |
| 4078 | 019a07 | AV619429 | LC008c04  |   |   | 5.1   | 4.7   | 4.4   | 1.0 | 0.2 | 1.4 | 0.9 |
| 4079 | 150e09 | BP098831 | MXL099h04 |   |   | 11.4  | 10.5  | 7.7   | 0.9 | 0.1 | 1.4 | 0.6 |
| 4080 | 153c11 | AV630445 | LCL078h12 |   |   | 2.6   | 3.3   | 2.3   | 1.2 | 0.3 | 1.4 | 0.5 |
| 4081 | 105d06 | AV396450 | CL62f11   |   |   | 6.9   | 7.0   | 4.9   | 1.0 | 0.1 | 1.4 | 0.4 |
| 4082 | 007b04 | AV391117 | CM051a11  |   |   | 54.8  | 57.1  | 42.9  | 1.1 | 0.3 | 1.4 | 0.5 |
| 4083 | 030f02 | AV631801 | LCL100a10 |   |   | 10.8  | 11.6  | 9.3   | 1.1 | 0.2 | 1.4 | 0.7 |
| 4084 | 020b04 | AV620777 | LC026f11  |   |   | 12.8  | 16.8  | 11.9  | 1.3 | 0.1 | 1.4 | 0.0 |
| 4085 | 015f04 | AV641258 | HCL030f05 |   |   | 15.5  | 16.0  | 11.3  | 1.0 | 0.1 | 1.4 | 0.1 |
| 4086 | 124h08 | AV640345 | HCL014f04 |   |   | 30.4  | 32.5  | 23.0  | 1.1 | 0.2 | 1.4 | 0.1 |
| 4087 | 024g02 | AV626773 | LCL015c03 |   |   | 14.2  | 11.0  | 7.7   | 0.8 | 0.2 | 1.4 | 0.2 |
| 4088 | 019h12 | AV620544 | LC023e06  |   |   | 9.2   | 17.6  | 12.5  | 2.1 | 0.7 | 1.4 | 0.2 |
| 4089 | 007a08 | AV391012 | CM049d11  |   |   | 44.3  | 37.8  | 27.2  | 0.8 | 0.2 | 1.4 | 0.5 |
| 4090 | 137a03 | AV621137 | LC031g02  |   |   | 9.4   | 7.2   | 5.3   | 0.8 | 0.2 | 1.4 | 0.4 |
| 4091 | 119d07 | AV635018 | HC040h04  |   |   | 12.7  | 13.7  | 10.4  | 1.0 | 0.3 | 1.4 | 0.8 |
| 4092 | 031b07 | BP086575 | MX011h04  |   |   | 16.3  | 20.7  | 15.4  | 1.3 | 0.7 | 1.4 | 0.8 |
| 4093 | 023a07 | AV624592 | LC079h02  |   |   | 33.6  | 23.5  | 17.5  | 0.7 | 0.1 | 1.4 | 0.4 |
| 4094 | 123b02 | AV639290 | HC097d12  |   |   | 16.6  | 23.7  | 18.2  | 1.4 | 0.1 | 1.4 | 0.5 |
| 4095 | 107h07 | AV387065 | CM013f05  |   |   | 10.9  | 22.1  | 16.0  | 2.1 | 0.4 | 1.4 | 0.2 |
| 4096 | 136b07 | BP383782 | LC023a05  |   |   | 71.2  | 75.6  | 54.2  | 1.1 | 0.1 | 1.4 | 0.2 |
| 4097 | 102c10 | AV394284 | CL20g03   |   |   | 21.0  | 26.3  | 19.3  | 1.3 | 0.2 | 1.4 | 0.4 |
| 4098 | 122e08 | AV638500 | HC087b06  |   |   | 12.8  | 12.5  | 9.7   | 1.0 | 0.1 | 1.4 | 0.7 |
| 4099 | 035h03 | BP097446 | MXL075h03 |   |   | 10.1  | 18.1  | 13.0  | 1.9 | 0.4 | 1.4 | 0.2 |
| 4100 | 128h06 | AV642581 | HCL054b11 |   |   | 25.9  | 29.8  | 21.1  | 1.1 | 0.3 | 1.4 | 0.8 |
| 4101 | 134c11 | AV619177 | LC004g09  |   |   | 7.4   | 8.6   | 6.3   | 1.2 | 0.5 | 1.4 | 0.6 |
| 4102 | 024h12 | AV626927 | LCL018b12 |   |   | 18.2  | 29.3  | 24.1  | 1.9 | 1.3 | 1.4 | 0.9 |
| 4103 | 120a10 | AV635698 | HC049f11  |   |   | 7.6   | 8.2   | 5.8   | 1.1 | 0.4 | 1.4 | 0.2 |
| 4104 | 026g04 | AV628527 | LCL043c09 |   |   | 6.5   | 8.5   | 6.3   | 1.3 | 0.2 | 1.4 | 0.3 |
| 4105 | 106a08 | AV396454 | CL74c02   |   |   | 3.0   | 4.0   | 2.9   | 1.4 | 0.4 | 1.4 | 0.3 |
| 4106 | 017f12 | AV643595 | HCL072d09 |   |   | 2.6   | 2.5   | 2.6   | 0.9 | 0.3 | 1.4 | 1.4 |
| 4107 | 130f03 | AV643590 | HCL072d02 |   |   | 15.6  | 22.6  | 16.0  | 1.4 | 0.2 | 1.4 | 0.3 |
| 4108 | 143f07 | AV625849 | LC098h01  |   |   | 8.8   | 10.7  | 7.6   | 1.2 | 0.1 | 1.4 | 0.2 |
| 4109 | 120h05 | BP383708 | HC060c03  |   |   | 385.1 | 380.0 | 283.5 | 1.0 | 0.1 | 1.4 | 0.3 |
| 4110 | 132f03 | AV644749 | HCL093c06 |   |   | 15.3  | 21.1  | 15.1  | 1.4 | 0.2 | 1.4 | 0.3 |
| 4111 | 137h03 | AV621927 | LC042g04  |   |   | 12.1  | 11.1  | 8.5   | 1.0 | 0.2 | 1.4 | 0.5 |
| 4112 | 112h09 | AV392480 | CM061g07  |   |   | 58.5  | 72.4  | 52.0  | 1.2 | 0.0 | 1.4 | 0.2 |
| 4113 | 025h10 | AV627925 | LCL033h12 |   |   | 6.3   | 7.1   | 5.2   | 1.1 | 0.1 | 1.4 | 0.5 |
| 4114 | 115b10 | AV390638 | CM085c06  |   |   | 9.5   | 11.1  | 8.0   | 1.2 | 0.2 | 1.4 | 0.1 |
| 4115 | 139a05 | AV622763 | LC054b11  |   |   | 11.6  | 9.1   | 6.6   | 0.8 | 0.1 | 1.4 | 0.5 |
| 4116 | 012g09 | AV637409 | HC072g10  |   |   | 4.7   | 7.9   | 5.4   | 1.7 | 0.8 | 1.4 | 0.6 |
| 4117 | 031e02 | BP086913 | MX020b04  |   |   | 5.8   | 6.5   | 4.9   | 1.1 | 0.1 | 1.4 | 0.4 |
| 4118 | 103c03 | AV394972 | CL33d04   |   |   | 5.6   | 6.7   | 4.9   | 1.2 | 0.1 | 1.4 | 0.2 |
| 4119 | 148b04 | AV627848 | LCL032h05 |   |   | 7.1   | 8.3   | 6.2   | 1.3 | 0.3 | 1.4 | 0.4 |
| 4120 | 146b01 | AV626989 | LCL019d07 |   |   | 27.3  | 21.8  | 16.0  | 1.0 | 0.5 | 1.4 | 0.3 |
| 4121 | 021b09 | AV622056 | LC044d11  |   |   | 118.3 | 102.7 | 94.6  | 0.9 | 0.4 | 1.4 | 0.9 |
| 4122 | 114e09 | AV388568 | CM078c03  |   |   | 25.9  | 43.4  | 36.2  | 1.7 | 0.2 | 1.4 | 0.6 |
| 4123 | 009d05 | AV391207 | CM089f04  |   |   | 8.4   | 12.0  | 8.6   | 1.4 | 0.2 | 1.4 | 0.1 |
| 4124 | 114a08 | AV388756 | CM072d06  |   |   | 92.2  | 92.0  | 65.9  | 1.2 | 0.6 | 1.4 | 0.1 |
| 4125 | 137c01 | AV621327 | LC034d10  |   |   | 3.4   | 3.7   | 3.0   | 1.2 | 0.4 | 1.4 | 0.5 |
| 4126 | 133d11 | AV645062 | HCL097f07 |   |   | 18.7  | 18.5  | 13.3  | 1.0 | 0.3 | 1.4 | 0.1 |
| 4127 | 010a02 | AV632069 | HC003e06  |   |   | 11.9  | 15.7  | 11.6  | 1.4 | 0.7 | 1.4 | 0.5 |
| 4128 | 107g09 | BP383674 | CM012h03  |   |   | 33.2  | 31.5  | 23.1  | 0.9 | 0.1 | 1.4 | 0.4 |
| 4129 | 019h07 | AV620474 | LC022f06  |   |   | 7.4   | 11.6  | 9.6   | 1.6 | 0.2 | 1.4 | 0.7 |
| 4130 | 032h02 | BP093663 | MXL011f08 |   |   | 1.6   | 2.1   | 1.6   | 1.4 | 0.3 | 1.4 | 0.5 |
| 4131 | 153c08 | AV630439 | LCL078h01 |   |   | 54.7  | 59.1  | 48.0  | 1.1 | 0.1 | 1.4 | 0.6 |
| 4132 | 012a09 | AV636027 | HC054b12  |   |   | 57.6  | 82.1  | 61.0  | 1.4 | 0.1 | 1.4 | 0.4 |
| 4133 | 151a05 | AV629299 | LCL056b07 |   |   | 9.5   | 14.5  | 10.3  | 1.5 | 0.3 | 1.4 | 0.3 |
| 4134 | 013a03 | AV637749 | HC077a05  |   |   | 144.3 | 229.6 | 167.3 | 1.6 | 0.4 | 1.4 | 0.3 |
| 4135 | 143b12 | AV625632 | LC095f11  |   |   | 5.4   | 6.5   | 4.8   | 1.2 | 0.2 | 1.4 | 0.4 |
| 4136 | 164b05 | BP094646 | MXL026d02 |   |   | 3.0   | 3.1   | 2.4   | 1.2 | 0.5 | 1.4 | 0.4 |
| 4137 | 122h11 | AV639058 | HC094e01  |   |   | 12.1  | 17.9  | 13.4  | 1.5 | 0.4 | 1.4 | 0.3 |
| 4138 | 117b10 | AV632370 | HC007d02  |   |   | 7.5   | 7.0   | 4.9   | 1.0 | 0.5 | 1.4 | 0.4 |
| 4139 | 003c04 | AV396243 | CL58d12   |   |   | 5.0   | 6.5   | 4.7   | 1.4 | 0.5 | 1.4 | 0.3 |
| 4140 | 027a02 | AV628724 | LCL046b12 |   |   | 10.9  | 10.4  | 7.4   | 0.9 | 0.2 | 1.4 | 0.3 |
| 4141 | 164h05 | BP094970 | MXL033e12 |   |   | 6.4   | 10.8  | 11.3  | 1.5 | 0.9 | 1.4 | 1.4 |
| 4142 | 135c11 | AV619784 | LC014d07  |   |   | 23.8  | 25.8  | 18.3  | 1.1 | 0.5 | 1.4 | 0.3 |
| 4143 | 169f12 | BP097089 | MXL069g11 |   |   | 146.4 | 124.7 | 95.1  | 1.0 | 0.6 | 1.4 | 0.4 |
| 4144 | 113f03 | AV397406 | CM068h11  |   |   | 19.0  | 14.5  | 10.4  | 0.8 | 0.2 | 1.4 | 0.4 |
| 4145 | 139g06 | AV623364 | LC062f10  |   |   | 9.6   | 11.1  | 8.2   | 1.2 | 0.3 | 1.4 | 0.4 |
| 4146 | 034g06 | BP096213 | MXL054f10 |   |   | 16.3  | 9.2   | 6.9   | 0.6 | 0.3 | 1.4 | 0.7 |
| 4147 | 122f12 | AV638724 | HC089h12  |   |   | 4.6   | 4.7   | 3.5   | 1.0 | 0.1 | 1.4 | 0.5 |
| 4148 | 107b09 | AV386834 | CM007e08  |   |   | 4.9   | 5.0   | 3.9   | 1.1 | 0.2 | 1.4 | 0.4 |
| 4149 | 121g11 | AV637564 | HC074g03  |   |   | 81.2  | 79.7  | 66.2  | 1.0 | 0.3 | 1.4 | 0.6 |
| 4150 | 134h10 | AV619595 | LC010e06  |   |   | 6.0   | 6.1   | 4.4   | 1.1 | 0.3 | 1.4 | 0.2 |
| 4151 | 106c12 | AV397236 | CL78d09   |   |   | 4.3   | 4.0   | 3.0   | 0.9 | 0.1 | 1.4 | 0.3 |
| 4152 | 165b05 | BP095080 | MXL035e01 |   |   | 10.4  | 11.9  | 9.6   | 1.7 | 1.1 | 1.4 | 0.5 |
| 4153 | 130c12 | AV643392 | HCL068h01 |   |   | 5.9   | 8.5   | 6.1   | 1.4 | 0.2 | 1.4 | 0.1 |
| 4154 | 106g02 | AV386587 | CM003a09  |   |   | 14.8  | 19.0  | 13.9  | 1.3 | 0.1 | 1.4 | 0.2 |
| 4155 | 120g12 | AV636454 | HC059f12  |   |   | 3.8   | 4.4   | 3.1   | 1.2 | 0.5 | 1.4 | 0.1 |
| 4156 | 108g08 | AV387943 | CM021g02  |   |   | 8.2   | 14.1  | 10.1  | 1.7 | 0.5 | 1.4 | 0.5 |
| 4157 | 104f02 | AV395925 | CL51e10   |   |   | 70.6  | 82.2  | 71.1  | 1.3 | 0.5 | 1.4 | 0.7 |
| 4158 | 021f02 | AV622585 | LC051f01  |   |   | 7.7   | 8.8   | 6.8   | 1.1 | 0.1 | 1.4 | 0.5 |
| 4159 | 114d12 | AV388025 | CM077d04  |   |   | 9.5   | 10.2  | 7.4   | 1.1 | 0.1 | 1.4 | 0.2 |
| 4160 | 153a02 | AV630271 | LCL076d10 |   |   | 22.6  | 22.6  | 17.0  | 1.0 | 0.2 | 1.4 | 0.5 |
| 4161 | 020b06 | AV620798 | LC027a04  |   |   | 75.6  | 101.0 | 84.7  | 1.4 | 0.5 | 1.4 | 0.6 |
| 4162 | 158c11 | BP087613 | MX039b01  |   |   | 3.4   | 4.9   | 3.6   | 1.6 | 0.8 | 1.4 | 0.5 |
| 4163 | 121d05 | BP383711 | HC068g07  |   |   | 59.9  | 88.1  | 74.5  | 1.6 | 0.6 | 1.4 | 0.6 |
| 4164 | 107h03 | AV387098 | CM013d10  |   |   | 9.4   | 11.9  | 8.8   | 1.3 | 0.2 | 1.4 | 0.5 |
| 4165 | 109e08 | AV387669 | CM027e12  |   |   | 19.6  | 21.9  | 15.7  | 1.1 | 0.3 | 1.4 | 0.4 |
| 4166 | 107h08 | AV387037 | CM013g01  |   |   | 17.1  | 17.1  | 12.8  | 1.0 | 0.4 | 1.4 | 0.6 |
| 4167 | 008h03 | AV388571 | CM077h03  |   |   | 29.2  | 27.1  | 21.9  | 1.0 | 0.4 | 1.4 | 0.7 |
| 4168 | 023b01 | BP383817 | LC080e02  |   |   | 24.2  | 20.1  | 14.5  | 0.8 | 0.2 | 1.4 | 0.3 |
| 4169 | 017h03 | AV643850 | HCL077b06 |   |   | 43.9  | 37.7  | 27.1  | 0.9 | 0.2 | 1.4 | 0.2 |
| 4170 | 117d04 | AV632621 | HC010     |   |   |       |       |       |     |     |     |     |

|      | A      | B        | C         | D | E | F      | G      | H      | I   | J   | K   | L   |
|------|--------|----------|-----------|---|---|--------|--------|--------|-----|-----|-----|-----|
| 4171 | 164f09 | BP094859 | MXL031c05 |   |   | 7.8    | 10.2   | 7.6    | 1.3 | 0.6 | 1.4 | 0.8 |
| 4172 | 024a01 | AV626248 | LCL005a11 |   |   | 21.1   | 18.3   | 16.9   | 0.9 | 0.4 | 1.4 | 1.0 |
| 4173 | 147e05 | AV627564 | LCL028f03 |   |   | 18.6   | 33.9   | 26.4   | 1.7 | 0.6 | 1.4 | 0.9 |
| 4174 | 026e02 | AV628355 | LCL040e04 |   |   | 11.8   | 16.8   | 12.9   | 1.4 | 0.3 | 1.4 | 0.7 |
| 4175 | 137g03 | AV621848 | LC041f11  |   |   | 13.4   | 26.0   | 19.6   | 2.0 | 0.6 | 1.4 | 0.3 |
| 4176 | 115d02 | AV390070 | CM086h03  |   |   | 6.4    | 8.3    | 6.2    | 1.3 | 0.1 | 1.4 | 0.3 |
| 4177 | 004g05 | AV387077 | CM013e09  |   |   | 78.0   | 93.8   | 67.1   | 1.2 | 0.4 | 1.4 | 0.3 |
| 4178 | 027d02 | AV629149 | LCL053b01 |   |   | 16.3   | 14.2   | 16.0   | 0.9 | 0.1 | 1.4 | 0.9 |
| 4179 | 132b10 | AV644531 | HCL090b05 |   |   | 9.0    | 9.9    | 8.0    | 1.1 | 0.1 | 1.4 | 0.5 |
| 4180 | 005a03 | AV388162 | CM017a07  |   |   | 80.8   | 91.2   | 68.3   | 1.2 | 0.4 | 1.4 | 0.4 |
| 4181 | 122b09 | BP383717 | HC079d12  |   |   | 49.8   | 52.1   | 38.8   | 1.0 | 0.1 | 1.4 | 0.3 |
| 4182 | 148g04 | AV628159 | LCL037f04 |   |   | 21.1   | 30.7   | 22.3   | 1.5 | 0.6 | 1.4 | 0.4 |
| 4183 | 025g05 | AV627798 | LCL032b11 |   |   | 17.7   | 44.3   | 34.0   | 2.5 | 0.3 | 1.4 | 0.5 |
| 4184 | 171d04 | BP097898 | MXL083b07 |   |   | 67.5   | 107.2  | 79.8   | 1.5 | 0.3 | 1.4 | 0.7 |
| 4185 | 124h11 | AV640357 | HCL014g12 |   |   | 14.1   | 14.8   | 11.3   | 1.1 | 0.2 | 1.4 | 0.3 |
| 4186 | 116f03 | AV392798 | CM100e12  |   |   | 162.6  | 199.7  | 149.0  | 1.2 | 0.1 | 1.4 | 0.3 |
| 4187 | 022b02 | AV623434 | LC063f12  |   |   | 35.5   | 23.8   | 16.9   | 0.7 | 0.2 | 1.4 | 0.3 |
| 4188 | 021f04 | AV622636 | LC052c05  |   |   | 117.9  | 100.9  | 82.9   | 0.8 | 0.3 | 1.4 | 0.9 |
| 4189 | 121a04 | AV636603 | HC061f12  |   |   | 3.2    | 3.6    | 2.7    | 1.1 | 0.2 | 1.4 | 0.5 |
| 4190 | 144g01 | AV626329 | LCL007b02 |   |   | 33.3   | 41.0   | 29.8   | 1.3 | 0.2 | 1.4 | 0.2 |
| 4191 | 136f12 | AV620821 | LC027c09  |   |   | 6.3    | 6.7    | 4.9    | 1.1 | 0.2 | 1.4 | 0.2 |
| 4192 | 104d05 | AV397717 | CL49c01   |   |   | 7.4    | 8.5    | 6.2    | 1.1 | 0.1 | 1.4 | 0.1 |
| 4193 | 153b12 | AV630383 | LCL078a12 |   |   | 14.3   | 22.5   | 16.3   | 1.6 | 0.5 | 1.4 | 0.4 |
| 4194 | 006c12 | AV389706 | CM039b12  |   |   | 7.5    | 11.2   | 8.1    | 1.5 | 0.4 | 1.4 | 0.1 |
| 4195 | 102g04 | AV394715 | CL27b04   |   |   | 74.4   | 83.4   | 61.1   | 1.2 | 0.3 | 1.4 | 0.1 |
| 4196 | 003h03 | AV397256 | CL77h03   |   |   | 4.1    | 5.6    | 4.1    | 1.5 | 0.5 | 1.4 | 0.3 |
| 4197 | 017c08 | AV643054 | HCL062h11 |   |   | 7.1    | 6.4    | 4.7    | 0.9 | 0.2 | 1.4 | 0.4 |
| 4198 | 026d12 | AV628352 | LCL040e01 |   |   | 23.0   | 26.3   | 24.0   | 1.2 | 0.6 | 1.4 | 1.0 |
| 4199 | 020h09 | AV621677 | LC039e08  |   |   | 5.1    | 18.5   | 13.3   | 3.8 | 2.4 | 1.4 | 0.4 |
| 4200 | 136c09 | BP383783 | LC024f12  |   |   | 67.4   | 61.1   | 56.2   | 0.9 | 0.2 | 1.4 | 0.7 |
| 4201 | 120e12 | AV636158 | HC055h08  |   |   | 76.7   | 71.7   | 69.1   | 1.0 | 0.2 | 1.4 | 0.8 |
| 4202 | 032d01 | BP093166 | MXL004e03 |   |   | 7.6    | 6.5    | 5.2    | 0.9 | 0.2 | 1.4 | 0.5 |
| 4203 | 118b10 | AV633549 | HC022b05  |   |   | 5.3    | 6.0    | 4.4    | 1.2 | 0.3 | 1.4 | 0.3 |
| 4204 | 114g08 | AV389945 | CM081a01  |   |   | 16.9   | 21.0   | 14.9   | 1.2 | 0.3 | 1.4 | 0.5 |
| 4205 | 136g05 | AV620862 | LC027g11  |   |   | 83.3   | 96.5   | 72.6   | 1.1 | 0.2 | 1.4 | 0.2 |
| 4206 | 018h11 | AV619305 | LC006d06  |   |   | 5.6    | 5.5    | 3.8    | 1.0 | 0.1 | 1.4 | 0.4 |
| 4207 | 102d08 | AV394236 | CL22c01   |   |   | 5.2    | 6.5    | 4.9    | 1.3 | 0.3 | 1.4 | 0.2 |
| 4208 | 133c02 | AV644991 | HCL096f07 |   |   | 211.1  | 242.9  | 178.5  | 1.4 | 0.6 | 1.4 | 0.2 |
| 4209 | 158d02 | BP087641 | MX040a11  |   |   | 22.8   | 25.5   | 18.7   | 1.3 | 0.7 | 1.4 | 0.4 |
| 4210 | 116e03 | AV392772 | CM099g09  |   |   | 45.4   | 56.9   | 47.8   | 1.3 | 0.2 | 1.4 | 0.7 |
| 4211 | 005e04 | AV388129 | CM025d02  |   |   | 11.9   | 22.1   | 16.4   | 1.9 | 0.2 | 1.4 | 0.2 |
| 4212 | 135h01 | AV620257 | LC019f11  |   |   | 6.2    | 8.0    | 5.8    | 1.3 | 0.3 | 1.4 | 0.1 |
| 4213 | 022h12 | AV624457 | LC078a06  |   |   | 9.3    | 13.5   | 9.8    | 1.5 | 0.3 | 1.4 | 0.0 |
| 4214 | 138g03 | AV622552 | LC051b05  |   |   | 91.9   | 144.2  | 137.7  | 1.6 | 0.4 | 1.4 | 0.8 |
| 4215 | 003d12 | AV396660 | CL64d06   |   |   | 3.1    | 2.3    | 2.0    | 0.8 | 0.1 | 1.4 | 0.7 |
| 4216 | 020g02 | AV621389 | LC035d04  |   |   | 15.4   | 24.6   | 17.9   | 1.6 | 0.1 | 1.4 | 0.2 |
| 4217 | 006d05 | AV389774 | CM039f10  |   |   | 4.1    | 5.9    | 4.3    | 1.5 | 0.2 | 1.4 | 0.1 |
| 4218 | 027b07 | AV628960 | LCL049f02 |   |   | 8.4    | 6.6    | 5.0    | 0.8 | 0.2 | 1.4 | 0.5 |
| 4219 | 163g06 | BP094495 | MXL024a05 |   |   | 19.9   | 17.2   | 14.8   | 1.1 | 0.8 | 1.4 | 1.0 |
| 4220 | 013a10 | AV637848 | HC078d08  |   |   | 7.4    | 9.2    | 7.4    | 1.3 | 0.5 | 1.4 | 0.8 |
| 4221 | 143a03 | AV625533 | LC094c01  |   |   | 8.4    | 7.0    | 5.1    | 0.8 | 0.1 | 1.4 | 0.3 |
| 4222 | 121e11 | AV637288 | HC071b08  |   |   | 86.2   | 85.6   | 73.8   | 1.0 | 0.2 | 1.4 | 0.6 |
| 4223 | 150a04 | AV628780 | LCL047a03 |   |   | 7.3    | 6.2    | 4.6    | 0.9 | 0.2 | 1.4 | 0.4 |
| 4224 | 114h01 | AV389923 | CM081e05  |   |   | 7.3    | 9.7    | 7.1    | 1.3 | 0.2 | 1.4 | 0.3 |
| 4225 | 151a03 | AV629291 | LCL056a03 |   |   | 12.6   | 9.9    | 7.4    | 0.8 | 0.2 | 1.4 | 0.2 |
| 4226 | 113d10 | AV393140 | CM067h02  |   |   | 6.8    | 6.7    | 4.9    | 1.0 | 0.2 | 1.4 | 0.2 |
| 4227 | 107d12 | AV397655 | CM009g11  |   |   | 28.1   | 16.7   | 12.0   | 0.7 | 0.3 | 1.4 | 0.2 |
| 4228 | 109a03 | AV387761 | CM023b04  |   |   | 4.9    | 6.9    | 5.1    | 1.8 | 0.8 | 1.4 | 0.4 |
| 4229 | 136f05 | AV620794 | LC026h12  |   |   | 4.1    | 14.5   | 10.4   | 3.5 | 1.4 | 1.4 | 0.5 |
| 4230 | 166b07 | BP095483 | MXL042e12 |   |   | 21.1   | 25.3   | 18.5   | 1.2 | 0.4 | 1.4 | 0.3 |
| 4231 | 139g03 | AV623330 | LC062b11  |   |   | 6352.0 | 6717.6 | 5917.9 | 1.1 | 0.3 | 1.4 | 0.8 |
| 4232 | 103f01 | AV395191 | CL39c07   |   |   | 3.6    | 4.6    | 3.4    | 1.3 | 0.1 | 1.4 | 0.3 |
| 4233 | 024b12 | AV626650 | LCL013a05 |   |   | 13.6   | 16.6   | 13.8   | 1.2 | 0.3 | 1.4 | 0.5 |
| 4234 | 110f01 | AV389505 | CM037b11  |   |   | 7.0    | 6.6    | 4.9    | 1.0 | 0.2 | 1.4 | 0.3 |
| 4235 | 012a03 | AV635812 | HC051c09  |   |   | 9.5    | 9.5    | 7.3    | 1.0 | 0.3 | 1.4 | 0.5 |
| 4236 | 118b04 | AV633459 | HC021a10  |   |   | 8.7    | 10.9   | 7.9    | 1.3 | 0.2 | 1.4 | 0.0 |
| 4237 | 028a02 | AV629543 | LCL060f07 |   |   | 7.9    | 6.9    | 5.2    | 0.9 | 0.1 | 1.4 | 0.5 |
| 4238 | 010e01 | AV632827 | HC013b01  |   |   | 10.7   | 11.0   | 8.0    | 1.1 | 0.5 | 1.4 | 0.4 |
| 4239 | 140g06 | AV624070 | LC072e09  |   |   | 25.2   | 28.5   | 20.6   | 1.1 | 0.1 | 1.4 | 0.3 |
| 4240 | 115c02 | AV390622 | CM085e08  |   |   | 3.8    | 4.3    | 3.2    | 1.3 | 0.6 | 1.4 | 0.3 |
| 4241 | 167c09 | BP095977 | MXL050d05 |   |   | 22.5   | 21.5   | 16.3   | 1.0 | 0.1 | 1.4 | 0.4 |
| 4242 | 150a05 | AV628781 | LCL047a04 |   |   | 18.9   | 19.4   | 17.0   | 1.0 | 0.1 | 1.4 | 0.7 |
| 4243 | 031d05 | BP086841 | MX018c01  |   |   | 25.8   | 34.6   | 26.0   | 1.3 | 0.1 | 1.4 | 0.3 |
| 4244 | 120f10 | AV636311 | HC057g12  |   |   | 15.2   | 28.6   | 20.4   | 2.2 | 1.5 | 1.4 | 0.2 |
| 4245 | 010h11 | AV633833 | HC025h03  |   |   | 5.9    | 9.2    | 6.2    | 1.3 | 0.6 | 1.4 | 1.2 |
| 4246 | 021a01 | AV621785 | LC040h10  |   |   | 18.0   | 20.6   | 15.4   | 1.2 | 0.6 | 1.4 | 0.7 |
| 4247 | 128c09 | AV642268 | HCL048f12 |   |   | 8.4    | 9.4    | 6.7    | 1.1 | 0.5 | 1.4 | 0.3 |
| 4248 | 007a03 | AV390951 | CM049b08  |   |   | 10.1   | 13.2   | 9.8    | 1.3 | 0.4 | 1.4 | 0.5 |
| 4249 | 148d04 | AV627980 | LCL034h02 |   |   | 29.6   | 44.1   | 32.1   | 1.5 | 0.3 | 1.4 | 0.2 |
| 4250 | 142d11 | BP383822 | LC088h08  |   |   | 70.9   | 78.4   | 66.1   | 1.1 | 0.2 | 1.4 | 0.7 |
| 4251 | 111b03 | AV390186 | CM043e01  |   |   | 6.9    | 13.8   | 10.3   | 2.2 | 1.0 | 1.4 | 0.4 |
| 4252 | 102h04 | AV394648 | CL29a02   |   |   | 22.4   | 25.5   | 18.5   | 1.1 | 0.2 | 1.4 | 0.1 |
| 4253 | 036h05 | BP098843 | MXL100a11 |   |   | 7.2    | 9.6    | 7.0    | 1.4 | 0.2 | 1.4 | 0.3 |
| 4254 | 134e02 | BP383776 | LC006g09  |   |   | 14.1   | 21.7   | 15.5   | 1.5 | 0.5 | 1.4 | 0.5 |
| 4255 | 013h05 | AV639622 | HCL002a07 |   |   | 2.2    | 2.9    | 2.0    | 1.3 | 0.4 | 1.4 | 0.6 |
| 4256 | 164c07 | BP094697 | MXL027f06 |   |   | 10.1   | 14.5   | 10.6   | 1.4 | 0.4 | 1.4 | 0.5 |
| 4257 | 149c12 | AV628462 | LCL042c05 |   |   | 6.1    | 6.9    | 5.0    | 1.2 | 0.3 | 1.4 | 0.3 |
| 4258 | 112f12 | AV392241 | CM059f10  |   |   | 16.0   | 18.2   | 13.9   | 1.1 | 0.1 | 1.4 | 0.3 |
| 4259 | 106e02 | AV386513 | CM001a01  |   |   | 3.9    | 4.5    | 3.2    | 1.1 | 0.1 | 1.4 | 0.1 |
| 4260 | 006h04 | AV390613 | CM047b07  |   |   | 8.3    | 12.0   | 8.8    | 1.6 | 0.5 | 1.4 | 0.1 |
| 4261 | 119b06 | AV634656 | HC036b03  |   |   | 150.1  | 180.4  | 134.6  | 1.2 | 0.2 | 1.4 | 0.2 |
| 4262 | 117a10 | AV632132 | HC004d01  |   |   | 4.1    | 4.2    | 3.1    | 1.0 | 0.4 | 1.4 | 0.3 |
| 4263 | 154h11 | AV631204 | LCL090b11 |   |   | 20.0   | 22.6   | 16.7   | 1.1 | 0.1 | 1.4 | 0.2 |
| 4264 | 108f03 | AV397434 | CM020f11  |   |   | 6.3    | 7.3    | 5.5    | 1.2 | 0.2 | 1.4 | 0.3 |
| 4265 | 134a04 | AV618904 | LC001b07  |   |   | 14.6   | 18.9   | 14.2   | 1.3 | 0.2 | 1.4 | 0.3 |
| 4266 | 128h11 | AV642611 | HCL054g01 |   |   | 3.9    | 4.5    | 3.4    | 1.2 | 0.3 | 1.4 | 0.3 |
| 4267 | 147b04 | AV627394 | LCL026b06 |   |   | 16.5   | 14.9   | 11.0   | 0.9 | 0.1 | 1.4 | 0.2 |
| 4268 | 142e05 | AU301246 | LC089d06  |   |   | 46.6   | 104.1  | 77.1   | 2.2 | 0.4 | 1.4 | 0.1 |
| 4269 | 132b04 | AV644504 | HCL089f08 |   |   | 9.4    | 12.7   | 9.0    | 1.3 | 0.4 | 1.4 | 0.3 |
| 4270 | 121c10 | AV637018 | HC067e04  |   |   | 6.4    | 7.0    | 5.3    | 1.1 | 0.2 | 1.4 | 0.7 |
| 4271 | 010h01 | AV633613 | HC023a03  |   |   | 7.7    | 12.2   | 9.2    | 1.6 | 0.2 | 1.4 | 0.4 |
| 4272 | 009h02 | AV392882 | CM100c11  |   |   | 3.3    | 5.3    | 4.0    | 2.1 | 1.0 | 1.4 | 0.5 |
| 4273 | 109d08 | AV387507 | CM026e10  |   |   | 15.9   | 22.2   | 16.3   | 1.5 | 0.4 | 1.4 | 0.2 |
| 4274 | 136b12 | AV620580 | LC023h12  |   |   | 12.3   | 17.6   | 13.2   | 1.5 | 0.4 | 1.4 | 0.4 |
| 4275 | 121h12 | AV637709 | HC076e07  |   |   | 33.2   | 45.8   | 33.8   | 1.4 | 0.1 | 1.4 | 0.1 |
| 4276 | 146e03 | AV627121 | LCL021d10 |   |   | 7.7    | 16.4   | 12.8   | 2.0 | 1.0 | 1.4 | 0.3 |
| 4277 | 155d09 | AV631421 |           |   |   |        |        |        |     |     |     |     |

|      | A      | B        | C         | D | E | F     | G     | H     | I   | J   | K   | L   |
|------|--------|----------|-----------|---|---|-------|-------|-------|-----|-----|-----|-----|
| 4278 | 138b05 | AV622101 | LC045a07  |   |   | 29.0  | 30.0  | 22.4  | 1.0 | 0.1 | 1.4 | 0.3 |
| 4279 | 102d01 | AV394400 | CL21e08   |   |   | 3.9   | 6.2   | 4.7   | 1.6 | 0.2 | 1.4 | 0.2 |
| 4280 | 119h12 | AV635631 | HC048g09  |   |   | 8.9   | 7.5   | 5.6   | 0.8 | 0.1 | 1.4 | 0.4 |
| 4281 | 145a10 | AV626482 | LCL009h09 |   |   | 15.5  | 16.3  | 12.7  | 1.1 | 0.3 | 1.4 | 0.4 |
| 4282 | 025a11 | AV627062 | LCL020e06 |   |   | 14.9  | 10.0  | 7.4   | 0.7 | 0.1 | 1.4 | 0.2 |
| 4283 | 168c05 | BP096383 | MXL057h11 |   |   | 8.2   | 13.7  | 10.3  | 1.7 | 0.4 | 1.4 | 0.5 |
| 4284 | 114a10 | AV388797 | CM072f03  |   |   | 4.7   | 7.5   | 5.5   | 1.6 | 0.2 | 1.4 | 0.2 |
| 4285 | 029d02 | AV630792 | LCL084d05 |   |   | 7.6   | 18.6  | 13.8  | 2.5 | 0.7 | 1.4 | 0.3 |
| 4286 | 125h02 | AV640819 | HCL022h07 |   |   | 10.6  | 11.3  | 8.4   | 1.1 | 0.2 | 1.4 | 0.2 |
| 4287 | 110e09 | AV389464 | CM036h11  |   |   | 12.6  | 25.8  | 19.2  | 2.1 | 0.7 | 1.4 | 0.4 |
| 4288 | 161c07 | BP093044 | MXL002e11 |   |   | 15.6  | 17.1  | 14.0  | 1.3 | 0.7 | 1.4 | 0.6 |
| 4289 | 011a05 | AV633975 | HC027f03  |   |   | 8.2   | 10.0  | 7.4   | 1.2 | 0.3 | 1.4 | 0.3 |
| 4290 | 009h07 | AV392860 | CM100h04  |   |   | 5.0   | 6.4   | 4.8   | 1.3 | 0.6 | 1.4 | 0.7 |
| 4291 | 010d04 | AV632680 | HC011c04  |   |   | 14.9  | 14.5  | 10.6  | 1.0 | 0.3 | 1.4 | 0.1 |
| 4292 | 101e04 | AV393672 | CL10b05   |   |   | 4.6   | 7.0   | 5.1   | 1.5 | 0.3 | 1.4 | 0.3 |
| 4293 | 119h09 | AV635615 | HC048e12  |   |   | 22.4  | 14.7  | 11.1  | 0.7 | 0.1 | 1.4 | 0.2 |
| 4294 | 144a05 | AV626073 | LCL002a02 |   |   | 11.8  | 9.9   | 7.3   | 0.9 | 0.2 | 1.4 | 0.2 |
| 4295 | 111f10 | AV391048 | CM050d01  |   |   | 4.1   | 4.7   | 3.4   | 1.2 | 0.4 | 1.4 | 0.2 |
| 4296 | 152a02 | AV629740 | LCL065a08 |   |   | 16.6  | 19.8  | 16.5  | 1.2 | 0.2 | 1.4 | 0.7 |
| 4297 | 113d03 | AV393061 | CM066h09  |   |   | 138.9 | 233.1 | 170.3 | 1.7 | 0.2 | 1.4 | 0.1 |
| 4298 | 109g02 | AV388385 | CM029b08  |   |   | 203.8 | 261.2 | 195.9 | 1.3 | 0.1 | 1.4 | 0.2 |
| 4299 | 028d11 | AV629998 | LCL070g02 |   |   | 2.2   | 3.6   | 2.6   | 1.6 | 0.3 | 1.4 | 0.3 |
| 4300 | 116c03 | AV393037 | CM097h01  |   |   | 11.8  | 12.5  | 9.5   | 1.1 | 0.4 | 1.4 | 0.5 |
| 4301 | 024c07 | AV626472 | LCL009g01 |   |   | 7.5   | 36.4  | 26.4  | 4.9 | 1.0 | 1.4 | 0.2 |
| 4302 | 131b04 | BP383748 | HCL077h01 |   |   | 123.4 | 169.0 | 116.6 | 1.2 | 0.6 | 1.4 | 0.9 |
| 4303 | 024e08 | AV626641 | LCL012g11 |   |   | 5.2   | 4.2   | 3.5   | 0.8 | 0.1 | 1.4 | 0.6 |
| 4304 | 114a09 | AV388769 | CM072d12  |   |   | 8.8   | 8.8   | 7.3   | 1.1 | 0.4 | 1.4 | 0.5 |
| 4305 | 033d11 | BP094379 | MXL022c05 |   |   | 10.0  | 10.8  | 7.9   | 1.1 | 0.2 | 1.4 | 0.2 |
| 4306 | 127d11 | AV641806 | HCL040f03 |   |   | 10.4  | 11.1  | 8.3   | 1.1 | 0.3 | 1.4 | 0.2 |
| 4307 | 136g10 | AV620916 | LC028e09  |   |   | 6.0   | 12.4  | 9.4   | 2.1 | 0.5 | 1.4 | 0.5 |
| 4308 | 029c03 | AV630722 | LCL083c07 |   |   | 4.3   | 3.5   | 2.8   | 0.8 | 0.2 | 1.4 | 0.4 |
| 4309 | 131g10 | AV644310 | HCL086a08 |   |   | 16.8  | 25.8  | 19.0  | 1.6 | 0.4 | 1.4 | 0.3 |
| 4310 | 102h07 | AV394664 | CL29f05   |   |   | 3.6   | 4.5   | 3.3   | 1.4 | 0.5 | 1.4 | 0.2 |
| 4311 | 121a03 | AV636587 | HC061e04  |   |   | 8.6   | 12.2  | 9.2   | 1.5 | 0.6 | 1.4 | 0.4 |
| 4312 | 121d10 | AV637145 | HC069d03  |   |   | 4.5   | 4.5   | 3.3   | 1.0 | 0.0 | 1.4 | 0.2 |
| 4313 | 027f05 | AV629311 | LCL056d02 |   |   | 12.0  | 13.3  | 14.0  | 1.1 | 0.4 | 1.4 | 1.1 |
| 4314 | 110b04 | AV388917 | CM033f07  |   |   | 5.6   | 8.0   | 6.1   | 1.5 | 0.4 | 1.4 | 0.4 |
| 4315 | 112c09 | AV391708 | CM055g07  |   |   | 8.7   | 9.7   | 7.9   | 1.1 | 0.1 | 1.4 | 0.7 |
| 4316 | 150c03 | AV628928 | LCL049b03 |   |   | 12.8  | 12.3  | 9.4   | 1.0 | 0.2 | 1.4 | 0.4 |
| 4317 | 150d01 | AV628954 | LCL049e05 |   |   | 21.9  | 19.1  | 15.3  | 0.9 | 0.1 | 1.4 | 0.5 |
| 4318 | 160f02 | BP088839 | MX101f10  |   |   | 171.4 | 165.3 | 124.7 | 1.1 | 0.3 | 1.4 | 0.4 |
| 4319 | 022a04 | AV623301 | LC061g08  |   |   | 20.1  | 27.6  | 23.8  | 1.3 | 0.5 | 1.4 | 0.9 |
| 4320 | 027c06 | AV629081 | LCL051f11 |   |   | 7.3   | 8.7   | 6.4   | 1.2 | 0.1 | 1.4 | 0.3 |
| 4321 | 029e01 | AV630868 | LCL085e01 |   |   | 8.3   | 9.2   | 7.0   | 1.2 | 0.5 | 1.4 | 0.3 |
| 4322 | 103e01 | AV395263 | CL37a08   |   |   | 16.8  | 24.7  | 17.7  | 1.5 | 0.3 | 1.4 | 0.5 |
| 4323 | 124h02 | AV640308 | HCL014a03 |   |   | 70.0  | 81.0  | 60.5  | 1.1 | 0.3 | 1.4 | 0.9 |
| 4324 | 004b05 | AV386567 | CM003e04  |   |   | 7.2   | 11.0  | 8.1   | 1.6 | 0.4 | 1.4 | 0.1 |
| 4325 | 162c08 | BP093625 | MXL011b03 |   |   | 9.2   | 13.7  | 10.1  | 1.5 | 0.3 | 1.4 | 0.2 |
| 4326 | 141g03 | AV624711 | LC081e08  |   |   | 41.8  | 50.8  | 47.4  | 1.2 | 0.4 | 1.4 | 0.7 |
| 4327 | 110h01 | AV389853 | CM040c10  |   |   | 46.0  | 60.2  | 45.3  | 1.4 | 0.2 | 1.4 | 0.4 |
| 4328 | 164g01 | BP094888 | MXL031g02 |   |   | 74.2  | 75.7  | 55.6  | 1.0 | 0.1 | 1.4 | 0.2 |
| 4329 | 121d12 | AV637151 | HC069d12  |   |   | 453.8 | 609.1 | 460.0 | 1.3 | 0.0 | 1.4 | 0.4 |
| 4330 | 122d12 | BP098682 | MXL097c12 |   |   | 123.2 | 125.2 | 93.2  | 1.0 | 0.2 | 1.4 | 0.4 |
| 4331 | 135f01 | AV620049 | LC016h07  |   |   | 8.7   | 10.1  | 7.6   | 1.2 | 0.2 | 1.4 | 0.2 |
| 4332 | 101a03 | AV393323 | CL01c09   |   |   | 46.9  | 70.7  | 53.8  | 1.5 | 0.2 | 1.4 | 0.6 |
| 4333 | 022a03 | AV623271 | LC061d04  |   |   | 13.8  | 14.8  | 10.9  | 1.1 | 0.3 | 1.4 | 0.4 |
| 4334 | 120e04 | AV636077 | HC054h06  |   |   | 68.7  | 81.9  | 68.1  | 1.2 | 0.2 | 1.4 | 0.6 |
| 4335 | 118e04 | AV633858 | HC026b09  |   |   | 35.2  | 36.9  | 27.4  | 1.1 | 0.2 | 1.4 | 0.2 |
| 4336 | 146b12 | AV627025 | LCL020a03 |   |   | 6.2   | 9.0   | 6.6   | 1.5 | 0.5 | 1.4 | 0.1 |
| 4337 | 129e07 | AV642916 | HCL060d08 |   |   | 10.8  | 11.8  | 9.0   | 1.1 | 0.1 | 1.4 | 0.5 |
| 4338 | 120h01 | AV636466 | HC059h01  |   |   | 74.1  | 66.2  | 52.5  | 0.9 | 0.1 | 1.4 | 0.9 |
| 4339 | 168h05 | BP096725 | MXL063g07 |   |   | 9.7   | 8.3   | 9.2   | 0.7 | 0.4 | 1.4 | 1.4 |
| 4340 | 126b11 | AV641075 | HCL027c10 |   |   | 31.1  | 44.2  | 32.4  | 1.4 | 0.3 | 1.4 | 0.3 |
| 4341 | 001e03 | AV393891 | CL14f05   |   |   | 3.9   | 4.0   | 3.1   | 1.1 | 0.3 | 1.4 | 0.2 |
| 4342 | 001d03 | AV393776 | CL11b08   |   |   | 2.1   | 2.4   | 1.8   | 1.2 | 0.2 | 1.4 | 0.2 |
| 4343 | 018d03 | AV644472 | HCL089b06 |   |   | 6.0   | 10.5  | 7.7   | 1.8 | 0.8 | 1.4 | 0.5 |
| 4344 | 021g02 | AV622756 | LC054b01  |   |   | 27.1  | 29.7  | 22.1  | 1.1 | 0.2 | 1.4 | 0.1 |
| 4345 | 119c07 | AV634842 | HC038f09  |   |   | 84.4  | 85.2  | 75.7  | 1.0 | 0.1 | 1.4 | 0.6 |
| 4346 | 111f09 | AV391015 | CM049f10  |   |   | 5.5   | 6.6   | 5.0   | 1.2 | 0.4 | 1.4 | 0.4 |
| 4347 | 112a06 | AV391385 | CM053g07  |   |   | 4.1   | 4.7   | 3.5   | 1.2 | 0.2 | 1.4 | 0.3 |
| 4348 | 024b03 | AV626349 | LCL007e08 |   |   | 4.0   | 2.8   | 2.1   | 0.7 | 0.3 | 1.4 | 0.4 |
| 4349 | 010b04 | AV632216 | HC005d07  |   |   | 27.5  | 30.3  | 22.9  | 1.1 | 0.1 | 1.4 | 0.3 |
| 4350 | 163d12 | BP094292 | MXL020f11 |   |   | 55.8  | 43.8  | 35.2  | 0.7 | 0.3 | 1.4 | 1.1 |
| 4351 | 020c11 | AV620930 | LC028g05  |   |   | 40.1  | 18.8  | 14.0  | 0.5 | 0.1 | 1.4 | 0.4 |
| 4352 | 148d05 | AV627996 | LCL035b01 |   |   | 7.6   | 7.7   | 6.0   | 1.1 | 0.2 | 1.4 | 0.3 |
| 4353 | 035d12 | BP097037 | MXL069a07 |   |   | 119.0 | 172.8 | 137.6 | 1.5 | 0.1 | 1.3 | 0.4 |
| 4354 | 104d01 | AV397715 | CL49a01   |   |   | 33.4  | 62.3  | 54.6  | 1.8 | 0.4 | 1.3 | 0.5 |
| 4355 | 140c02 | AV623693 | LC067d04  |   |   | 12.0  | 11.6  | 9.7   | 1.0 | 0.1 | 1.3 | 0.4 |
| 4356 | 157c05 | BP086759 | MX016b07  |   |   | 7.9   | 8.3   | 6.6   | 1.2 | 0.4 | 1.3 | 0.5 |
| 4357 | 101d02 | AV393560 | CL05h06   |   |   | 25.3  | 35.4  | 28.1  | 1.4 | 0.2 | 1.3 | 0.6 |
| 4358 | 147h12 | AV627770 | LCL031g08 |   |   | 6.0   | 12.7  | 9.6   | 2.2 | 0.4 | 1.3 | 0.3 |
| 4359 | 111d02 | AV390469 | CM046e09  |   |   | 15.4  | 13.4  | 10.7  | 0.9 | 0.1 | 1.3 | 0.5 |
| 4360 | 145g11 | AV626868 | LCL017a04 |   |   | 12.7  | 19.0  | 13.3  | 1.5 | 0.9 | 1.3 | 0.4 |
| 4361 | 104g03 | AV395950 | CL53e03   |   |   | 7.5   | 7.7   | 6.1   | 1.1 | 0.4 | 1.3 | 0.4 |
| 4362 | 115b09 | BP383682 | CM085b04  |   |   | 28.5  | 23.7  | 17.7  | 0.8 | 0.3 | 1.3 | 0.1 |
| 4363 | 154a06 | AV630766 | LCL084a07 |   |   | 25.4  | 32.5  | 24.0  | 1.3 | 0.1 | 1.3 | 0.1 |
| 4364 | 009f01 | AV392100 | CM094f03  |   |   | 7.4   | 6.0   | 5.0   | 0.9 | 0.6 | 1.3 | 0.7 |
| 4365 | 126h03 | AV641539 | HCL035g09 |   |   | 4.3   | 5.1   | 3.8   | 1.2 | 0.4 | 1.3 | 0.2 |
| 4366 | 019h02 | AV620316 | LC020d12  |   |   | 7.6   | 7.8   | 5.8   | 1.0 | 0.1 | 1.3 | 0.2 |
| 4367 | 124c12 | AV640107 | HCL010e05 |   |   | 26.0  | 27.7  | 20.7  | 1.1 | 0.1 | 1.3 | 0.1 |
| 4368 | 028g11 | AV630309 | LCL077a06 |   |   | 17.3  | 22.5  | 16.7  | 1.3 | 0.1 | 1.3 | 0.1 |
| 4369 | 117d08 | AV632655 | HC010h12  |   |   | 37.8  | 38.7  | 28.7  | 1.0 | 0.2 | 1.3 | 0.5 |
| 4370 | 028f03 | AV630146 | LCL074b10 |   |   | 16.2  | 79.3  | 59.2  | 4.9 | 0.8 | 1.3 | 0.2 |
| 4371 | 135h12 | AV620370 | LC021c03  |   |   | 12.7  | 14.8  | 11.1  | 1.2 | 0.2 | 1.3 | 0.2 |
| 4372 | 125f02 | AV640714 | HCL021b11 |   |   | 142.1 | 151.4 | 110.9 | 1.0 | 0.4 | 1.3 | 0.9 |
| 4373 | 154d11 | AV630969 | LCL087a07 |   |   | 11.1  | 13.4  | 10.1  | 1.2 | 0.2 | 1.3 | 0.2 |
| 4374 | 164b08 | BP094652 | MXL026d11 |   |   | 7.8   | 10.9  | 8.8   | 1.5 | 0.4 | 1.3 | 0.4 |
| 4375 | 101e02 | AV393521 | CL08h02   |   |   | 16.3  | 18.6  | 15.5  | 1.2 | 0.3 | 1.3 | 0.5 |
| 4376 | 139b03 | AV622852 | LC055e12  |   |   | 13.9  | 10.4  | 7.7   | 0.7 | 0.2 | 1.3 | 0.4 |
| 4377 | 131a11 | AV643857 | HCL077c07 |   |   | 14.4  | 16.1  | 12.2  | 1.1 | 0.2 | 1.3 | 0.3 |
| 4378 | 139c06 | AV622934 | LC056g03  |   |   | 1.9   | 3.9   | 3.0   | 2.3 | 0.9 | 1.3 | 0.4 |
| 4379 | 007d06 | AV391571 | CM055c05  |   |   | 246.9 | 249.1 | 202.7 | 1.0 | 0.1 | 1.3 | 0.6 |
| 4380 | 122g07 | AV638850 | HC091f05  |   |   | 7.0   | 9.5   | 7.2   | 1.4 | 0.3 | 1.3 | 0.2 |
| 4381 | 025f11 | AV627728 | LCL031b12 |   |   | 16.4  | 17.7  | 13.2  | 1.1 | 0.0 | 1.3 | 0.1 |
| 4382 | 148f08 | AV628130 | LCL037b12 |   |   | 14.2  | 21.6  | 15.8  | 1.6 | 0.9 | 1.3 | 0.6 |
| 4383 | 119h01 | AV635498 | HC047b01  |   |   | 9.4   | 10.3  | 7.7   | 1.1 | 0.2 | 1.3 | 0.3 |
| 4384 | 123h01 |          |           |   |   |       |       |       |     |     |     |     |



|      | A      | B        | C         | D | E | F      | G      | H     | I   | J   | K   | L   |
|------|--------|----------|-----------|---|---|--------|--------|-------|-----|-----|-----|-----|
| 4385 | 134e11 | AV619379 | LC007e11  |   |   | 8.6    | 13.6   | 9.8   | 1.5 | 0.7 | 1.3 | 0.4 |
| 4386 | 030e02 | AV631684 | LCL098b09 |   |   | 7.1    | 7.7    | 6.3   | 1.2 | 0.4 | 1.3 | 0.5 |
| 4387 | 128a09 | AV642147 | HCL046d04 |   |   | 11.2   | 13.6   | 10.2  | 1.3 | 0.2 | 1.3 | 0.2 |
| 4388 | 144c08 | AV626215 | LCL004d10 |   |   | 5.1    | 5.5    | 4.1   | 1.1 | 0.4 | 1.3 | 0.2 |
| 4389 | 161d05 | BP093112 | MXL003e07 |   |   | 14.7   | 21.9   | 17.5  | 1.5 | 0.7 | 1.3 | 0.8 |
| 4390 | 115e01 | BP383683 | CM088e10  |   |   | 6.0    | 11.0   | 8.6   | 1.9 | 0.2 | 1.3 | 0.3 |
| 4391 | 167c06 | BP095969 | MXL050c07 |   |   | 10.7   | 12.5   | 9.4   | 1.2 | 0.4 | 1.3 | 0.5 |
| 4392 | 109d11 | AV387553 | CM026g05  |   |   | 4.8    | 5.5    | 4.1   | 1.3 | 0.6 | 1.3 | 0.3 |
| 4393 | 159e08 | BP087834 | MX044f02  |   |   | 9.1    | 10.7   | 8.1   | 1.1 | 0.3 | 1.3 | 0.6 |
| 4394 | 133g04 | AV645194 | HCL099d10 |   |   | 4.9    | 7.2    | 5.3   | 1.5 | 0.5 | 1.3 | 0.3 |
| 4395 | 011c02 | AV634487 | HC034a06  |   |   | 11.5   | 15.0   | 11.3  | 1.3 | 0.3 | 1.3 | 0.2 |
| 4396 | 120d07 | AV636015 | HC054a08  |   |   | 21.2   | 30.2   | 23.3  | 1.7 | 0.5 | 1.3 | 0.6 |
| 4397 | 001e02 | AV393863 | CL14c03   |   |   | 10.9   | 15.3   | 11.4  | 1.4 | 0.3 | 1.3 | 0.1 |
| 4398 | 028g03 | AV630237 | LCL075h05 |   |   | 8.2    | 8.3    | 6.6   | 1.0 | 0.1 | 1.3 | 0.5 |
| 4399 | 023d04 | AV625073 | LC087e04  |   |   | 12.6   | 20.6   | 15.6  | 1.7 | 0.5 | 1.3 | 0.4 |
| 4400 | 118c11 | AV633681 | HC023h09  |   |   | 37.1   | 30.9   | 23.4  | 0.8 | 0.1 | 1.3 | 0.1 |
| 4401 | 119c01 | AV634761 | HC037e10  |   |   | 1301.3 | 1090.2 | 865.6 | 0.8 | 0.1 | 1.3 | 0.3 |
| 4402 | 007h01 | AV392394 | CM061d03  |   |   | 107.8  | 67.9   | 50.2  | 0.6 | 0.2 | 1.3 | 0.5 |
| 4403 | 140d05 | AV623801 | LC068h01  |   |   | 5.3    | 6.9    | 5.3   | 1.3 | 0.1 | 1.3 | 0.3 |
| 4404 | 163e02 | BP094301 | MXL020g11 |   |   | 7.3    | 7.2    | 5.7   | 1.0 | 0.2 | 1.3 | 0.7 |
| 4405 | 140e05 | AV623881 | LC070a03  |   |   | 12.3   | 33.5   | 25.0  | 2.7 | 0.4 | 1.3 | 0.1 |
| 4406 | 151b05 | AV629348 | LCL057b01 |   |   | 11.4   | 10.7   | 8.0   | 1.0 | 0.4 | 1.3 | 0.1 |
| 4407 | 171b08 | BP097761 | MXL080h11 |   |   | 13.5   | 11.4   | 8.8   | 0.9 | 0.3 | 1.3 | 0.3 |
| 4408 | 109f12 | AV388338 | CM028h01  |   |   | 6.9    | 8.0    | 6.1   | 1.2 | 0.1 | 1.3 | 0.2 |
| 4409 | 137c11 | AV621470 | LC036e12  |   |   | 6.7    | 8.1    | 6.1   | 1.2 | 0.2 | 1.3 | 0.5 |
| 4410 | 152b06 | AV629813 | LCL066f10 |   |   | 20.6   | 25.0   | 18.7  | 1.2 | 0.1 | 1.3 | 0.1 |
| 4411 | 127d10 | AV641804 | HCL040e09 |   |   | 7.8    | 6.9    | 5.5   | 0.9 | 0.1 | 1.3 | 0.4 |
| 4412 | 122b05 | BP383716 | HC078h08  |   |   | 96.9   | 72.7   | 57.9  | 0.7 | 0.1 | 1.3 | 0.8 |
| 4413 | 014c02 | AV639863 | HCL006c08 |   |   | 4.9    | 6.7    | 5.1   | 1.4 | 0.4 | 1.3 | 0.3 |
| 4414 | 167b09 | BP095925 | MXL049e03 |   |   | 14.2   | 12.7   | 12.6  | 0.9 | 0.3 | 1.3 | 0.9 |
| 4415 | 030e09 | AV631747 | LCL099b04 |   |   | 12.3   | 33.2   | 25.3  | 3.2 | 2.2 | 1.3 | 0.6 |
| 4416 | 035g02 | BP097311 | MXL073e03 |   |   | 31.0   | 38.6   | 29.2  | 1.3 | 0.2 | 1.3 | 0.2 |
| 4417 | 164f12 | BP094883 | MXL031f07 |   |   | 145.8  | 120.5  | 88.4  | 0.8 | 0.1 | 1.3 | 0.3 |
| 4418 | 002f01 | AV395528 | CL43b11   |   |   | 3.7    | 3.3    | 2.9   | 0.9 | 0.3 | 1.3 | 0.6 |
| 4419 | 136f09 | AV620813 | LC027b11  |   |   | 5.2    | 5.8    | 4.6   | 1.1 | 0.2 | 1.3 | 0.6 |
| 4420 | 029c01 | AV630702 | LCL082h10 |   |   | 14.0   | 13.2   | 11.7  | 1.0 | 0.2 | 1.3 | 0.6 |
| 4421 | 121g06 | AV637494 | HC079g11  |   |   | 6.0    | 7.7    | 5.8   | 1.3 | 0.3 | 1.3 | 0.2 |
| 4422 | 152c12 | AV629913 | LCL068h08 |   |   | 8.7    | 8.9    | 6.6   | 1.0 | 0.3 | 1.3 | 0.3 |
| 4423 | 136h09 | AV621020 | LC030a09  |   |   | 8.0    | 8.6    | 6.4   | 1.1 | 0.4 | 1.3 | 0.2 |
| 4424 | 132a07 | AV644422 | HCL088c02 |   |   | 19.1   | 16.1   | 12.2  | 0.8 | 0.1 | 1.3 | 0.1 |
| 4425 | 152a10 | AV629792 | LCL066c07 |   |   | 7.9    | 9.3    | 7.7   | 1.2 | 0.5 | 1.3 | 0.7 |
| 4426 | 122a12 | AV637849 | HC078d09  |   |   | 22.8   | 30.9   | 23.1  | 1.4 | 0.6 | 1.3 | 0.1 |
| 4427 | 021a05 | AV621833 | LC041e06  |   |   | 11.8   | 9.5    | 7.2   | 0.8 | 0.1 | 1.3 | 0.2 |
| 4428 | 016e03 | AV642263 | HCL048f05 |   |   | 5.3    | 6.1    | 4.5   | 1.2 | 0.2 | 1.3 | 0.3 |
| 4429 | 006a08 | AV388918 | CM033f10  |   |   | 6.1    | 6.3    | 5.1   | 1.1 | 0.2 | 1.3 | 0.5 |
| 4430 | 030h03 | BP086217 | MX004d01  |   |   | 6.6    | 7.0    | 5.3   | 1.1 | 0.1 | 1.3 | 0.1 |
| 4431 | 142f06 | AV625352 | LC091d03  |   |   | 13.3   | 10.9   | 9.3   | 0.9 | 0.5 | 1.3 | 0.7 |
| 4432 | 145c08 | AV626597 | LCL012a11 |   |   | 6.6    | 5.0    | 3.9   | 0.8 | 0.3 | 1.3 | 0.3 |
| 4433 | 147a04 | AV627339 | LCL025c05 |   |   | 24.7   | 22.6   | 17.4  | 0.9 | 0.1 | 1.3 | 0.3 |
| 4434 | 021a12 | AV621952 | LC043b01  |   |   | 83.1   | 69.1   | 52.1  | 0.8 | 0.1 | 1.3 | 0.2 |
| 4435 | 142e08 | BP383823 | LC089h01  |   |   | 326.8  | 341.5  | 285.9 | 1.0 | 0.0 | 1.3 | 0.6 |
| 4436 | 155c10 | AV631373 | LCL092h03 |   |   | 22.1   | 25.1   | 18.9  | 1.2 | 0.3 | 1.3 | 0.2 |
| 4437 | 112a09 | AV391415 | CM054b12  |   |   | 3.7    | 3.5    | 3.1   | 0.9 | 0.3 | 1.3 | 0.9 |
| 4438 | 019h11 | AV620538 | LC023d12  |   |   | 34.9   | 33.3   | 25.3  | 0.9 | 0.1 | 1.3 | 0.3 |
| 4439 | 015d05 | AV641079 | HCL027d06 |   |   | 2.8    | 3.1    | 2.4   | 1.1 | 0.4 | 1.3 | 0.5 |
| 4440 | 108b10 | AV388177 | CM017a08  |   |   | 6.0    | 7.5    | 5.6   | 1.3 | 0.3 | 1.3 | 0.1 |
| 4441 | 016a07 | AV641634 | HCL037h03 |   |   | 96.1   | 82.4   | 66.3  | 0.8 | 0.1 | 1.3 | 0.6 |
| 4442 | 143b04 | AV625596 | LC095b06  |   |   | 7.7    | 9.1    | 6.8   | 1.2 | 0.3 | 1.3 | 0.0 |
| 4443 | 142h09 | BP383826 | LC094a06  |   |   | 124.5  | 131.2  | 103.5 | 1.1 | 0.2 | 1.3 | 0.3 |
| 4444 | 152b08 | AV629824 | LCL067a01 |   |   | 4.9    | 4.3    | 3.3   | 0.9 | 0.1 | 1.3 | 0.4 |
| 4445 | 012f01 | AV637090 | HC068e10  |   |   | 8.8    | 9.9    | 7.6   | 1.2 | 0.6 | 1.3 | 0.3 |
| 4446 | 103c11 | AV394905 | CL34g01   |   |   | 4.2    | 5.0    | 3.8   | 1.2 | 0.2 | 1.3 | 0.1 |
| 4447 | 108d04 | AV387248 | CM018c07  |   |   | 8.4    | 10.5   | 8.2   | 1.3 | 0.4 | 1.3 | 0.4 |
| 4448 | 145a03 | AV626459 | LCL009e02 |   |   | 10.1   | 10.2   | 7.7   | 1.0 | 0.1 | 1.3 | 0.2 |
| 4449 | 002d03 | AV395258 | CL37b06   |   |   | 6.4    | 5.0    | 3.7   | 0.9 | 0.3 | 1.3 | 0.4 |
| 4450 | 115e11 | AV391177 | CM089d06  |   |   | 150.4  | 179.7  | 136.5 | 1.2 | 0.1 | 1.3 | 0.5 |
| 4451 | 122g04 | AV638791 | HC090h02  |   |   | 16.3   | 18.3   | 15.5  | 1.1 | 0.3 | 1.3 | 0.6 |
| 4452 | 035b11 | BP096767 | MXL064e11 |   |   | 19.0   | 21.5   | 16.9  | 1.1 | 0.3 | 1.3 | 0.5 |
| 4453 | 154b02 | AV630798 | LCL084d11 |   |   | 15.1   | 11.8   | 10.1  | 0.8 | 0.2 | 1.3 | 0.5 |
| 4454 | 123g10 | AV639798 | HCL005b10 |   |   | 39.5   | 33.1   | 27.5  | 0.9 | 0.2 | 1.3 | 0.5 |
| 4455 | 026c12 | AV628281 | LCL039e08 |   |   | 6.9    | 8.5    | 6.4   | 1.2 | 0.2 | 1.3 | 0.3 |
| 4456 | 009c06 | AV391103 | CM087e05  |   |   | 7.2    | 9.6    | 7.4   | 1.3 | 0.1 | 1.3 | 0.3 |
| 4457 | 153a08 | AV630292 | LCL076g08 |   |   | 6.4    | 7.1    | 5.4   | 1.1 | 0.2 | 1.3 | 0.1 |
| 4458 | 113g11 | AV397362 | CM070f11  |   |   | 7.2    | 8.0    | 6.0   | 1.1 | 0.4 | 1.3 | 0.4 |
| 4459 | 012b03 | AV636147 | HC055g08  |   |   | 11.7   | 16.0   | 12.0  | 1.4 | 0.2 | 1.3 | 0.1 |
| 4460 | 117d03 | AV632594 | HC010b05  |   |   | 4.4    | 6.0    | 4.6   | 1.4 | 0.4 | 1.3 | 0.3 |
| 4461 | 135b11 | AV619904 | LC013d04  |   |   | 301.6  | 361.1  | 280.5 | 1.2 | 0.2 | 1.3 | 0.2 |
| 4462 | 143b05 | AV625598 | LC095b11  |   |   | 16.5   | 19.1   | 15.0  | 1.2 | 0.1 | 1.3 | 0.5 |
| 4463 | 123a11 | AV639261 | HC097b02  |   |   | 15.3   | 19.1   | 14.6  | 1.3 | 0.0 | 1.3 | 0.2 |
| 4464 | 011h01 | AV635567 | HC048a01  |   |   | 31.0   | 29.0   | 21.9  | 1.0 | 0.2 | 1.3 | 0.2 |
| 4465 | 024f12 | AV626763 | LCL015a07 |   |   | 9.0    | 29.2   | 21.5  | 3.5 | 2.2 | 1.3 | 0.6 |
| 4466 | 133g06 | AV645203 | HCL099e08 |   |   | 2.3    | 2.6    | 2.0   | 1.1 | 0.3 | 1.3 | 0.4 |
| 4467 | 112f01 | AV392042 | CM058b05  |   |   | 17.5   | 15.1   | 11.9  | 0.9 | 0.1 | 1.3 | 0.4 |
| 4468 | 102h02 | AV394821 | CL28f08   |   |   | 3.5    | 4.9    | 3.7   | 1.4 | 0.2 | 1.3 | 0.0 |
| 4469 | 118b12 | AV633572 | HC022d11  |   |   | 4.1    | 6.7    | 5.4   | 1.6 | 0.4 | 1.3 | 0.6 |
| 4470 | 127a09 | AV641618 | HCL037e09 |   |   | 21.1   | 27.3   | 20.3  | 1.3 | 0.5 | 1.3 | 0.3 |
| 4471 | 135c07 | AV619807 | LC014b06  |   |   | 98.4   | 127.9  | 100.5 | 1.3 | 0.3 | 1.3 | 0.2 |
| 4472 | 143a11 | AV625565 | LC094f11  |   |   | 16.9   | 22.0   | 16.9  | 1.4 | 0.4 | 1.3 | 0.2 |
| 4473 | 139b07 | AV622861 | LC055f09  |   |   | 6.1    | 5.8    | 4.4   | 1.0 | 0.0 | 1.3 | 0.3 |
| 4474 | 025f03 | AV627599 | LCL029c05 |   |   | 9.5    | 14.2   | 10.8  | 1.5 | 0.2 | 1.3 | 0.1 |
| 4475 | 172c07 | BP098312 | MXL091c10 |   |   | 15.9   | 20.9   | 17.0  | 1.3 | 0.1 | 1.3 | 0.4 |
| 4476 | 119g12 | AV635496 | HC047a11  |   |   | 13.8   | 15.1   | 11.6  | 1.2 | 0.4 | 1.3 | 0.2 |
| 4477 | 108a08 | AV387443 | CM016a05  |   |   | 53.8   | 55.7   | 43.4  | 1.0 | 0.1 | 1.3 | 0.3 |
| 4478 | 024f07 | AV626708 | LCL014a11 |   |   | 5.5    | 4.6    | 4.0   | 0.8 | 0.2 | 1.3 | 0.8 |
| 4479 | 026b11 | AV628157 | LCL037f01 |   |   | 13.0   | 14.7   | 11.0  | 1.1 | 0.1 | 1.3 | 0.2 |
| 4480 | 143a06 | AV625543 | LC094d05  |   |   | 17.5   | 25.0   | 19.3  | 1.5 | 0.5 | 1.3 | 0.3 |
| 4481 | 156e12 | BP086209 | MX004b04  |   |   | 49.6   | 53.9   | 40.2  | 1.1 | 0.1 | 1.3 | 0.3 |
| 4482 | 157e12 | BP087047 | MX023g08  |   |   | 11.9   | 14.8   | 11.4  | 1.2 | 0.1 | 1.3 | 0.3 |
| 4483 | 123c04 | AV639416 | HC099a10  |   |   | 9.5    | 12.0   | 9.7   | 1.3 | 0.2 | 1.3 | 0.4 |
| 4484 | 103a10 | AV395000 | CL31d08   |   |   | 8.5    | 5.0    | 4.4   | 0.7 | 0.2 | 1.3 | 0.8 |
| 4485 | 117d02 | AV632590 | HC010a10  |   |   | 7.0    | 8.5    | 6.4   | 1.2 | 0.1 | 1.3 | 0.1 |
| 4486 | 031b01 | BP086530 | MX010g11  |   |   | 17.5   | 40.2   | 35.3  | 2.6 | 1.2 | 1.3 | 0.6 |
| 4487 | 142a01 | AV624824 | LC083c05  |   |   | 223.1  | 232.8  | 176.9 | 1.0 | 0.0 | 1.3 | 0.3 |
| 4488 | 171f04 | BP098006 | MXL085b12 |   |   | 6.1    | 7.1    | 5.7   | 1.2 | 0.2 | 1.3 | 0.4 |
| 4489 | 123e01 | AV639602 | HCL001f10 |   |   | 128.7  | 107.0  | 83.4  | 0.8 | 0.2 | 1.3 | 0.4 |
| 4490 | 018f02 | AV619011 | LC002e11  |   |   | 5.9    | 4.3    | 3.5   | 1.0 | 0.6 | 1.3 | 0.6 |
| 4491 | 110f03 | AV389539 | CM037     |   |   |        |        |       |     |     |     |     |

|      | A      | B        | C         | D | E | F     | G     | H     | I    | J   | K   | L   |
|------|--------|----------|-----------|---|---|-------|-------|-------|------|-----|-----|-----|
| 4492 | 128f11 | AV642479 | HCL052e08 |   |   | 3.7   | 5.5   | 4.2   | 1.5  | 0.2 | 1.3 | 0.2 |
| 4493 | 021h02 | AV623000 | LCO57f04  |   |   | 5.1   | 4.8   | 3.8   | 1.1  | 0.7 | 1.3 | 0.6 |
| 4494 | 016e06 | AV642278 | HCL048h05 |   |   | 3.0   | 2.8   | 2.7   | 1.0  | 0.2 | 1.3 | 0.7 |
| 4495 | 101f03 | AV393769 | CL11g05   |   |   | 68.7  | 57.2  | 43.4  | 0.9  | 0.1 | 1.3 | 0.1 |
| 4496 | 109c05 | AV389071 | CM025b06  |   |   | 135.0 | 141.6 | 109.8 | 1.1  | 0.1 | 1.3 | 0.3 |
| 4497 | 159e03 | BP087801 | MX043h04  |   |   | 23.6  | 26.0  | 19.1  | 1.1  | 0.3 | 1.3 | 0.3 |
| 4498 | 034d01 | BP095662 | MXL045d08 |   |   | 68.4  | 60.8  | 44.9  | 0.9  | 0.1 | 1.3 | 0.4 |
| 4499 | 141d11 | AV624485 | LCO78d05  |   |   | 11.2  | 14.5  | 11.0  | 1.4  | 0.3 | 1.3 | 0.2 |
| 4500 | 133h09 | AV645288 | HCL100f09 |   |   | 4.9   | 5.9   | 4.7   | 1.2  | 0.1 | 1.3 | 0.5 |
| 4501 | 161f08 | BP093259 | MXL005g08 |   |   | 93.7  | 90.2  | 76.7  | 1.0  | 0.1 | 1.3 | 0.7 |
| 4502 | 157b03 | BP086592 | MX012d09  |   |   | 17.0  | 15.8  | 12.7  | 0.9  | 0.2 | 1.3 | 0.4 |
| 4503 | 145c03 | AV626573 | LCL011f07 |   |   | 23.6  | 20.4  | 16.1  | 0.9  | 0.2 | 1.3 | 0.3 |
| 4504 | 125b02 | AV640437 | HCL016c07 |   |   | 5.6   | 5.0   | 3.9   | 0.9  | 0.2 | 1.3 | 0.2 |
| 4505 | 121f10 | AV637405 | HC072g06  |   |   | 4.5   | 5.1   | 4.2   | 1.1  | 0.2 | 1.3 | 0.7 |
| 4506 | 132b03 | AV644490 | HCL089d08 |   |   | 10.6  | 12.2  | 10.7  | 1.2  | 0.4 | 1.3 | 0.6 |
| 4507 | 107d11 | AV397644 | CM009g07  |   |   | 5.2   | 8.5   | 6.7   | 1.7  | 0.4 | 1.3 | 0.3 |
| 4508 | 108f01 | AV397460 | CM020f04  |   |   | 15.6  | 20.0  | 15.6  | 1.3  | 0.4 | 1.3 | 0.2 |
| 4509 | 036f01 | BP098426 | MXL093b05 |   |   | 11.3  | 10.6  | 9.4   | 0.9  | 0.2 | 1.3 | 0.7 |
| 4510 | 134h11 | AV619597 | LCO10e10  |   |   | 10.1  | 9.5   | 7.9   | 1.0  | 0.1 | 1.3 | 0.6 |
| 4511 | 130h09 | AV643748 | HCL075c12 |   |   | 19.1  | 40.4  | 29.8  | 2.1  | 0.7 | 1.3 | 0.4 |
| 4512 | 103a04 | AV395276 | CL37e06   |   |   | 8.2   | 10.5  | 7.9   | 1.3  | 0.3 | 1.3 | 0.2 |
| 4513 | 146e05 | AV627124 | LCL021e01 |   |   | 27.1  | 48.6  | 37.7  | 1.9  | 0.3 | 1.3 | 0.2 |
| 4514 | 101h10 | AV394030 | CL16c06   |   |   | 3.5   | 4.5   | 3.5   | 1.3  | 0.3 | 1.3 | 0.4 |
| 4515 | 133e12 | AV645108 | HCL098c11 |   |   | 20.3  | 18.3  | 14.4  | 1.0  | 0.2 | 1.3 | 0.3 |
| 4516 | 131d05 | AV644085 | HCL081e08 |   |   | 7.8   | 7.6   | 5.9   | 1.0  | 0.5 | 1.3 | 0.5 |
| 4517 | 102f05 | AV627999 | LCL035b05 |   |   | 10.9  | 53.5  | 40.8  | 4.9  | 1.4 | 1.3 | 0.5 |
| 4518 | 110c01 | AV389034 | CM034c05  |   |   | 3.9   | 6.7   | 5.4   | 1.7  | 0.1 | 1.3 | 0.3 |
| 4519 | 120c07 | AV635925 | HC052g07  |   |   | 11.3  | 10.0  | 8.4   | 0.9  | 0.2 | 1.3 | 0.7 |
| 4520 | 023e09 | AV625194 | LC089b04  |   |   | 31.0  | 22.7  | 17.2  | 0.7  | 0.0 | 1.3 | 0.1 |
| 4521 | 158d08 | BP087648 | MX040c03  |   |   | 17.3  | 17.1  | 13.2  | 1.0  | 0.1 | 1.3 | 0.3 |
| 4522 | 118g07 | AV634198 | HC030d08  |   |   | 6.9   | 13.5  | 10.4  | 1.9  | 0.1 | 1.3 | 0.1 |
| 4523 | 102b12 | AV394209 | CL19g08   |   |   | 6.5   | 7.6   | 6.0   | 1.2  | 0.1 | 1.3 | 0.5 |
| 4524 | 136d11 | AV620709 | LC025g08  |   |   | 13.8  | 14.5  | 12.0  | 1.1  | 0.2 | 1.3 | 0.5 |
| 4525 | 027c07 | AV629084 | LCL051g05 |   |   | 12.0  | 18.1  | 14.1  | 1.5  | 0.2 | 1.3 | 0.2 |
| 4526 | 151c07 | AV629411 | LCL058c09 |   |   | 12.0  | 17.4  | 13.3  | 1.5  | 0.1 | 1.3 | 0.2 |
| 4527 | 015c12 | AV640997 | HCL025h11 |   |   | 14.0  | 10.5  | 9.7   | 0.8  | 0.4 | 1.3 | 0.9 |
| 4528 | 135a03 | AV619624 | LCO10h09  |   |   | 11.0  | 11.0  | 9.4   | 1.0  | 0.1 | 1.3 | 0.7 |
| 4529 | 123b12 | AV639371 | HC098e05  |   |   | 91.9  | 73.0  | 55.8  | 0.8  | 0.0 | 1.3 | 0.4 |
| 4530 | 141c12 | BP383815 | LC077e10  |   |   | 132.5 | 119.3 | 114.4 | 0.9  | 0.2 | 1.3 | 0.7 |
| 4531 | 019b03 | AV619580 | LCO10c10  |   |   | 3.5   | 2.6   | 2.2   | 0.7  | 0.1 | 1.3 | 0.5 |
| 4532 | 123e05 | AV639616 | HCL001h10 |   |   | 22.1  | 26.2  | 19.8  | 1.3  | 0.6 | 1.3 | 0.3 |
| 4533 | 140e08 | AV623905 | LC070c06  |   |   | 9.5   | 27.5  | 21.0  | 2.9  | 0.3 | 1.3 | 0.1 |
| 4534 | 170e01 | BP097433 | MXL075f07 |   |   | 62.8  | 85.3  | 68.3  | 1.4  | 0.3 | 1.3 | 0.4 |
| 4535 | 135g11 | AV620249 | LC019e12  |   |   | 23.5  | 29.3  | 23.1  | 1.3  | 0.6 | 1.3 | 0.5 |
| 4536 | 138c03 | AV622168 | LC046a09  |   |   | 12.1  | 11.4  | 8.7   | 0.9  | 0.0 | 1.3 | 0.4 |
| 4537 | 103b10 | AV394838 | CL32h05   |   |   | 51.5  | 50.5  | 38.4  | 1.1  | 0.5 | 1.3 | 0.2 |
| 4538 | 133a09 | AV644951 | HCL095h05 |   |   | 13.1  | 12.3  | 9.7   | 0.9  | 0.2 | 1.3 | 0.4 |
| 4539 | 131b11 | AV643933 | HCL078f07 |   |   | 14.2  | 15.3  | 11.6  | 1.1  | 0.2 | 1.3 | 0.2 |
| 4540 | 026h05 | AV628613 | LCL044e08 |   |   | 20.1  | 42.2  | 33.0  | 2.2  | 0.7 | 1.3 | 0.2 |
| 4541 | 002f07 | AV395586 | CL44h12   |   |   | 7.6   | 9.6   | 7.3   | 1.3  | 0.2 | 1.3 | 0.1 |
| 4542 | 141c03 | AV624361 | LCO76f09  |   |   | 5.6   | 5.3   | 4.1   | 1.0  | 0.1 | 1.3 | 0.2 |
| 4543 | 128e07 | AV642429 | HCL051f01 |   |   | 41.7  | 37.9  | 29.6  | 0.9  | 0.1 | 1.3 | 0.1 |
| 4544 | 102h08 | AV394631 | CL29f08   |   |   | 13.1  | 13.5  | 10.8  | 1.0  | 0.1 | 1.3 | 0.4 |
| 4545 | 134h08 | AV619588 | LCO10d09  |   |   | 14.1  | 16.5  | 12.7  | 1.3  | 0.4 | 1.3 | 0.2 |
| 4546 | 121d07 | AV637115 | HC068h08  |   |   | 10.8  | 11.0  | 9.0   | 1.0  | 0.4 | 1.3 | 0.7 |
| 4547 | 109g01 | AV388355 | CM028h09  |   |   | 3.9   | 4.8   | 3.8   | 1.2  | 0.3 | 1.3 | 0.3 |
| 4548 | 131h04 | AV644341 | HCL086g01 |   |   | 7.2   | 7.4   | 5.8   | 1.1  | 0.3 | 1.3 | 0.2 |
| 4549 | 012h02 | AV637526 | HC074c01  |   |   | 5.5   | 6.7   | 5.1   | 1.4  | 0.5 | 1.3 | 0.5 |
| 4550 | 033c03 | BP094216 | MXL019f08 |   |   | 17.5  | 19.9  | 15.2  | 1.2  | 0.3 | 1.3 | 0.2 |
| 4551 | 118d04 | BP383691 | HC024d06  |   |   | 54.3  | 66.9  | 55.2  | 1.2  | 0.2 | 1.3 | 0.6 |
| 4552 | 152f10 | AV630071 | LCL072e04 |   |   | 4.5   | 4.6   | 3.6   | 1.0  | 0.2 | 1.3 | 0.4 |
| 4553 | 022c09 | AV623657 | LC066h02  |   |   | 15.1  | 19.1  | 14.6  | 1.3  | 0.2 | 1.3 | 0.1 |
| 4554 | 146g04 | AV627223 | LCL023a01 |   |   | 12.3  | 11.6  | 9.5   | 0.9  | 0.1 | 1.3 | 0.6 |
| 4555 | 032f11 | BP093546 | MXL009h09 |   |   | 10.0  | 9.9   | 7.9   | 1.0  | 0.1 | 1.3 | 0.4 |
| 4556 | 017e03 | AV643274 | HCL066f10 |   |   | 6.5   | 7.5   | 5.6   | 1.2  | 0.1 | 1.3 | 0.3 |
| 4557 | 161f07 | BP093243 | MXL005e08 |   |   | 8.2   | 6.7   | 6.8   | 0.9  | 0.4 | 1.3 | 0.9 |
| 4558 | 132g11 | AV644830 | HCL094d04 |   |   | 5.7   | 8.0   | 6.3   | 1.5  | 0.3 | 1.3 | 0.4 |
| 4559 | 117b11 | AV632372 | HC007d04  |   |   | 7.8   | 7.6   | 5.9   | 1.0  | 0.1 | 1.3 | 0.2 |
| 4560 | 160c05 | BP088505 | MX062b03  |   |   | 3.1   | 4.6   | 3.5   | 1.8  | 0.9 | 1.3 | 0.2 |
| 4561 | 122h06 | AV639002 | HC093f07  |   |   | 143.7 | 141.2 | 110.0 | 1.0  | 0.1 | 1.3 | 0.1 |
| 4562 | 128d12 | AV642400 | HCL051b08 |   |   | 100.9 | 103.6 | 94.1  | 1.1  | 0.2 | 1.3 | 0.7 |
| 4563 | 036e03 | BP098302 | MXL091b08 |   |   | 14.4  | 13.8  | 11.3  | 1.0  | 0.1 | 1.3 | 0.5 |
| 4564 | 102a11 | AV394079 | CL18e08   |   |   | 9.7   | 14.0  | 10.7  | 1.5  | 0.5 | 1.3 | 0.1 |
| 4565 | 117b02 | AV632229 | HC005e10  |   |   | 25.2  | 39.6  | 32.0  | 1.6  | 0.1 | 1.3 | 0.3 |
| 4566 | 142a03 | AV624850 | LC083e12  |   |   | 100.1 | 106.4 | 95.6  | 1.1  | 0.1 | 1.3 | 0.6 |
| 4567 | 139h06 | AV623442 | LCO63h02  |   |   | 3.7   | 108.7 | 85.3  | 29.8 | 6.8 | 1.3 | 0.2 |
| 4568 | 123c01 | AV639372 | HC098e07  |   |   | 23.2  | 21.4  | 17.0  | 0.9  | 0.2 | 1.3 | 0.5 |
| 4569 | 148c12 | AV625936 | LC100a07  |   |   | 14.7  | 19.2  | 14.2  | 1.2  | 0.4 | 1.3 | 0.7 |
| 4570 | 015a11 | AV640712 | HCL021b09 |   |   | 30.3  | 22.6  | 18.5  | 0.8  | 0.2 | 1.3 | 0.5 |
| 4571 | 024d09 | AV626555 | LCL011c01 |   |   | 5.4   | 8.8   | 7.1   | 1.6  | 0.8 | 1.3 | 0.8 |
| 4572 | 154d12 | AV630971 | LCL087a10 |   |   | 4.9   | 5.5   | 4.3   | 1.1  | 0.3 | 1.3 | 0.4 |
| 4573 | 014e09 | AV640127 | HCL010h02 |   |   | 86.1  | 87.6  | 67.2  | 1.2  | 0.3 | 1.3 | 0.5 |
| 4574 | 151a06 | AV629300 | LCL056b09 |   |   | 13.4  | 15.9  | 12.5  | 1.2  | 0.1 | 1.3 | 0.2 |
| 4575 | 148b10 | AV627869 | LCL033b04 |   |   | 116.2 | 108.1 | 90.0  | 0.9  | 0.2 | 1.3 | 1.0 |
| 4576 | 116f02 | AV392844 | CM100e11  |   |   | 6.8   | 8.5   | 6.6   | 1.2  | 0.1 | 1.3 | 0.2 |
| 4577 | 142c05 | BP383821 | LC085h09  |   |   | 275.3 | 265.4 | 213.3 | 1.0  | 0.1 | 1.3 | 0.2 |
| 4578 | 133f06 | AV645140 | HCL098g02 |   |   | 11.5  | 9.0   | 6.8   | 0.8  | 0.1 | 1.3 | 0.3 |
| 4579 | 140h02 | AV624104 | LC073a04  |   |   | 51.7  | 40.5  | 32.9  | 0.8  | 0.1 | 1.3 | 0.4 |
| 4580 | 153f11 | AV630596 | LCL081c07 |   |   | 98.4  | 82.4  | 65.8  | 0.9  | 0.2 | 1.3 | 0.5 |
| 4581 | 010f01 | AV633037 | HC015h10  |   |   | 63.9  | 71.8  | 61.0  | 1.2  | 0.5 | 1.3 | 0.6 |
| 4582 | 148e06 | AV628058 | LCL036a12 |   |   | 21.9  | 20.6  | 16.1  | 0.9  | 0.1 | 1.3 | 0.2 |
| 4583 | 034e05 | BP095899 | MXL049a05 |   |   | 46.3  | 50.6  | 46.9  | 1.1  | 0.4 | 1.3 | 0.9 |
| 4584 | 010g06 | AV633520 | HC021g04  |   |   | 6.1   | 7.5   | 5.8   | 1.2  | 0.1 | 1.3 | 0.2 |
| 4585 | 116c06 | AV392273 | CM098a04  |   |   | 69.3  | 62.6  | 48.1  | 0.9  | 0.2 | 1.3 | 0.1 |
| 4586 | 001b05 | AV393597 | CL05e08   |   |   | 2.6   | 1.8   | 1.6   | 1.0  | 0.7 | 1.3 | 0.6 |
| 4587 | 009b12 | AV390572 | CM085f12  |   |   | 8.0   | 6.8   | 5.8   | 0.9  | 0.3 | 1.3 | 0.5 |
| 4588 | 102a04 | AV394109 | CL17f05   |   |   | 1.3   | 1.5   | 1.2   | 1.1  | 0.4 | 1.3 | 0.5 |
| 4589 | 110g09 | AV389826 | CM040b04  |   |   | 21.1  | 23.4  | 18.2  | 1.2  | 0.2 | 1.3 | 0.1 |
| 4590 | 132b07 | AV644509 | HCL089g05 |   |   | 6.5   | 8.2   | 6.5   | 1.3  | 0.4 | 1.3 | 0.4 |
| 4591 | 117e02 | AV632748 | HC012b01  |   |   | 51.9  | 75.1  | 56.6  | 1.5  | 0.6 | 1.3 | 0.1 |
| 4592 | 023h06 | AV626218 | LCL004e03 |   |   | 7.2   | 8.0   | 6.4   | 1.1  | 0.1 | 1.3 | 0.6 |
| 4593 | 127b11 | AV641689 | HCL038f12 |   |   | 10.2  | 11.4  | 8.8   | 1.1  | 0.1 | 1.3 | 0.1 |
| 4594 | 156c01 | AV631777 | LCL099f08 |   |   | 56.3  | 49.8  | 37.7  | 0.9  | 0.0 | 1.3 | 0.3 |
| 4595 | 104f01 | AV395912 | CL51e05   |   |   | 5.5   | 7.2   | 5.9   | 1.4  | 0.4 | 1.3 | 0.6 |
| 4596 | 141g12 | AV624775 | LC082e08  |   |   | 95.5  | 94.9  | 79.9  | 1.0  | 0.1 | 1.3 | 0.5 |
| 4597 | 135f04 | AV620062 | LCO17a12  |   |   | 8.7   | 20.0  | 15.4  | 2.3  | 0.7 | 1.3 | 0.1 |
| 4598 | 122c01 | AV637954 |           |   |   |       |       |       |      |     |     |     |

|      | A      | B        | C         | D | E | F     | G     | H     | I   | J   | K   | L   |
|------|--------|----------|-----------|---|---|-------|-------|-------|-----|-----|-----|-----|
| 4599 | 105d03 | AV396423 | CL62d06   |   |   | 6.0   | 8.2   | 6.5   | 1.4 | 0.1 | 1.3 | 0.3 |
| 4600 | 113b07 | AV392821 | CM064e12  |   |   | 6.4   | 9.0   | 6.9   | 1.4 | 0.2 | 1.3 | 0.4 |
| 4601 | 140d06 | AV623804 | LC068h05  |   |   | 15.6  | 12.7  | 9.8   | 0.9 | 0.2 | 1.3 | 0.2 |
| 4602 | 140g08 | AV624082 | LC072f12  |   |   | 10.5  | 12.2  | 9.4   | 1.2 | 0.4 | 1.3 | 0.1 |
| 4603 | 136c03 | AV620591 | LC024a11  |   |   | 18.0  | 19.2  | 14.7  | 1.1 | 0.1 | 1.3 | 0.1 |
| 4604 | 019e07 | AV619992 | LC015h12  |   |   | 7.5   | 6.6   | 5.8   | 0.9 | 0.1 | 1.3 | 0.8 |
| 4605 | 013f07 | AV639126 | HC095c09  |   |   | 17.5  | 19.5  | 17.4  | 1.1 | 0.2 | 1.3 | 0.6 |
| 4606 | 154b12 | AV630854 | LCL085c02 |   |   | 9.9   | 10.6  | 8.2   | 1.1 | 0.1 | 1.3 | 0.1 |
| 4607 | 102a07 | AV394119 | CL17h10   |   |   | 11.8  | 11.7  | 9.2   | 1.0 | 0.2 | 1.3 | 0.3 |
| 4608 | 102h01 | AV394801 | CL28c01   |   |   | 2.3   | 3.8   | 2.9   | 1.6 | 0.3 | 1.3 | 0.4 |
| 4609 | 125a04 | AV640385 | HCL015d01 |   |   | 7.9   | 9.9   | 8.1   | 1.3 | 0.2 | 1.3 | 0.3 |
| 4610 | 023g07 | AV626081 | LCL002b03 |   |   | 13.2  | 11.1  | 9.2   | 0.8 | 0.3 | 1.3 | 0.6 |
| 4611 | 114f06 | AV389094 | CM078h06  |   |   | 6.8   | 10.1  | 7.9   | 1.5 | 0.3 | 1.3 | 0.5 |
| 4612 | 106b10 | AV397077 | CL75h02   |   |   | 9.2   | 13.3  | 10.2  | 1.4 | 0.3 | 1.3 | 0.3 |
| 4613 | 133a01 | BP383763 | HCL094h09 |   |   | 155.4 | 124.5 | 98.4  | 0.8 | 0.1 | 1.3 | 0.3 |
| 4614 | 155g12 | AV631625 | LCL097b10 |   |   | 19.4  | 19.8  | 15.4  | 1.0 | 0.1 | 1.3 | 0.1 |
| 4615 | 135e01 | AV619981 | LC015g12  |   |   | 13.4  | 16.5  | 13.1  | 1.3 | 0.2 | 1.3 | 0.3 |
| 4616 | 148c08 | AV627948 | LCL034c12 |   |   | 6.0   | 7.5   | 5.7   | 1.3 | 0.2 | 1.3 | 0.2 |
| 4617 | 017f09 | AV643579 | HCL072b08 |   |   | 12.9  | 18.8  | 18.8  | 1.7 | 1.1 | 1.3 | 0.9 |
| 4618 | 142b02 | AV624917 | LC084e04  |   |   | 30.1  | 30.2  | 24.7  | 1.0 | 0.3 | 1.3 | 0.7 |
| 4619 | 110a02 | AV388712 | CM031e07  |   |   | 4.8   | 7.1   | 5.6   | 1.5 | 0.4 | 1.3 | 0.2 |
| 4620 | 154e05 | AV630986 | LCL087c06 |   |   | 9.7   | 9.0   | 7.5   | 1.0 | 0.3 | 1.3 | 0.5 |
| 4621 | 120d04 | AV635994 | HC053g09  |   |   | 45.0  | 58.7  | 47.7  | 1.3 | 0.2 | 1.3 | 0.2 |
| 4622 | 029h05 | AV631183 | LCL089h11 |   |   | 31.5  | 28.1  | 22.2  | 0.9 | 0.2 | 1.3 | 0.3 |
| 4623 | 134c08 | AV619150 | LC004d12  |   |   | 103.9 | 129.7 | 105.7 | 1.2 | 0.2 | 1.3 | 0.2 |
| 4624 | 120c08 | AV635932 | HC052h06  |   |   | 100.3 | 97.0  | 89.8  | 1.0 | 0.1 | 1.3 | 0.7 |
| 4625 | 123g02 | AV639742 | HCL004c02 |   |   | 9.5   | 7.2   | 5.8   | 0.8 | 0.2 | 1.3 | 0.5 |
| 4626 | 105d05 | AV396446 | CL62e12   |   |   | 71.8  | 107.3 | 80.8  | 1.4 | 0.3 | 1.3 | 0.6 |
| 4627 | 148a06 | AV627794 | LCL032b06 |   |   | 5.1   | 5.0   | 4.0   | 1.0 | 0.1 | 1.3 | 0.3 |
| 4628 | 113g08 | AV397411 | CM070e06  |   |   | 8.0   | 9.2   | 7.1   | 1.2 | 0.1 | 1.3 | 0.1 |
| 4629 | 001a02 | AV393297 | CL01c11   |   |   | 7.4   | 3.8   | 3.0   | 0.5 | 0.2 | 1.3 | 0.4 |
| 4630 | 014c10 | AV639911 | HCL007a12 |   |   | 9.2   | 14.1  | 11.6  | 1.7 | 1.1 | 1.3 | 0.9 |
| 4631 | 010f04 | AV633142 | HC017c06  |   |   | 20.6  | 14.7  | 12.0  | 0.8 | 0.2 | 1.3 | 0.5 |
| 4632 | 105d02 | AV396435 | CL62a09   |   |   | 11.7  | 14.9  | 12.6  | 1.2 | 0.3 | 1.3 | 0.7 |
| 4633 | 023e07 | AV625171 | LC088h01  |   |   | 21.9  | 28.3  | 22.6  | 1.4 | 0.4 | 1.3 | 0.3 |
| 4634 | 004e01 | AV386770 | CM008h08  |   |   | 47.1  | 56.6  | 44.4  | 1.2 | 0.1 | 1.3 | 0.3 |
| 4635 | 167b01 | BP095884 | MXL048g08 |   |   | 5.7   | 5.6   | 5.2   | 1.0 | 0.2 | 1.3 | 0.7 |
| 4636 | 124f08 | AV640220 | HCL012d08 |   |   | 16.9  | 19.2  | 15.7  | 1.1 | 0.1 | 1.3 | 0.4 |
| 4637 | 104h02 | AV396151 | CL54g07   |   |   | 9.7   | 16.4  | 12.4  | 1.7 | 0.7 | 1.3 | 0.3 |
| 4638 | 025g01 | AV627751 | LCL031e02 |   |   | 6.5   | 6.0   | 4.8   | 0.9 | 0.1 | 1.3 | 0.3 |
| 4639 | 028c08 | AV629843 | LCL067d03 |   |   | 17.3  | 17.1  | 13.1  | 1.0 | 0.3 | 1.3 | 0.1 |
| 4640 | 128c12 | AV642304 | HCL049d07 |   |   | 120.7 | 151.3 | 114.3 | 1.1 | 0.6 | 1.3 | 1.0 |
| 4641 | 137d03 | AV621510 | LC037a11  |   |   | 114.7 | 118.2 | 104.1 | 1.1 | 0.1 | 1.3 | 0.4 |
| 4642 | 035g06 | BP097383 | MXL074g06 |   |   | 37.2  | 28.9  | 22.5  | 0.8 | 0.0 | 1.3 | 0.2 |
| 4643 | 105h01 | AV396791 | CL69h06   |   |   | 25.4  | 25.6  | 20.2  | 1.2 | 0.4 | 1.3 | 0.3 |
| 4644 | 028g06 | AV630266 | LCL076d02 |   |   | 3.0   | 3.1   | 2.7   | 1.1 | 0.3 | 1.3 | 0.6 |
| 4645 | 115h12 | AV392004 | CM093h06  |   |   | 10.9  | 14.4  | 11.3  | 1.4 | 0.3 | 1.3 | 0.2 |
| 4646 | 006h09 | AV390733 | CM047f04  |   |   | 11.5  | 13.9  | 11.1  | 1.2 | 0.4 | 1.3 | 0.6 |
| 4647 | 146b06 | AV627006 | LCL019f12 |   |   | 7.0   | 6.7   | 5.2   | 1.0 | 0.1 | 1.3 | 0.2 |
| 4648 | 022e09 | AV623996 | LC071e06  |   |   | 4.0   | 3.0   | 2.6   | 0.8 | 0.1 | 1.3 | 0.5 |
| 4649 | 102e09 | AV394443 | CL24b02   |   |   | 789.8 | 602.1 | 494.7 | 0.7 | 0.1 | 1.3 | 0.7 |
| 4650 | 109b02 | AV387747 | CM023g07  |   |   | 7.9   | 10.1  | 8.2   | 1.3 | 0.4 | 1.3 | 0.3 |
| 4651 | 115a03 | AV390272 | CM082g06  |   |   | 72.4  | 108.3 | 86.8  | 1.6 | 0.4 | 1.3 | 0.2 |
| 4652 | 105f06 | AV396742 | CL66h01   |   |   | 14.5  | 13.5  | 11.0  | 1.0 | 0.2 | 1.3 | 0.3 |
| 4653 | 136g01 | AV620852 | LC027f11  |   |   | 17.4  | 26.1  | 20.3  | 1.5 | 0.2 | 1.3 | 0.2 |
| 4654 | 012b02 | AV636139 | HC055f07  |   |   | 12.2  | 16.8  | 13.2  | 1.4 | 0.1 | 1.3 | 0.1 |
| 4655 | 137b09 | AV621255 | LC033e01  |   |   | 11.9  | 10.4  | 8.1   | 0.9 | 0.1 | 1.3 | 0.1 |
| 4656 | 128a07 | AV642139 | HCL046c06 |   |   | 4.4   | 4.6   | 3.8   | 1.1 | 0.1 | 1.3 | 0.4 |
| 4657 | 158d03 | BP087642 | MX040a12  |   |   | 6.7   | 7.9   | 6.1   | 1.2 | 0.5 | 1.3 | 0.5 |
| 4658 | 010g03 | AV633488 | HC021d07  |   |   | 160.2 | 211.3 | 175.8 | 1.3 | 0.2 | 1.3 | 0.4 |
| 4659 | 137g02 | AV621846 | LC041f08  |   |   | 13.3  | 25.9  | 20.5  | 2.0 | 0.6 | 1.3 | 0.1 |
| 4660 | 116g10 | BP383687 | HC001e02  |   |   | 13.7  | 13.6  | 10.7  | 1.0 | 0.2 | 1.3 | 0.2 |
| 4661 | 118c06 | AV633647 | HC023d11  |   |   | 87.3  | 99.6  | 78.1  | 1.2 | 0.1 | 1.3 | 0.3 |
| 4662 | 115c08 | AV390152 | CM086c12  |   |   | 2.7   | 3.0   | 2.4   | 1.1 | 0.3 | 1.3 | 0.4 |
| 4663 | 157f01 | BP087052 | MX024a02  |   |   | 17.8  | 17.1  | 13.7  | 1.1 | 0.4 | 1.3 | 0.3 |
| 4664 | 115c04 | AV390575 | CM085h03  |   |   | 79.0  | 85.9  | 66.9  | 1.1 | 0.0 | 1.3 | 0.2 |
| 4665 | 014a10 | AV639715 | HCL003e12 |   |   | 10.2  | 9.0   | 7.4   | 0.9 | 0.2 | 1.3 | 0.4 |
| 4666 | 033h05 | BP095041 | MXL034h05 |   |   | 8.5   | 10.7  | 8.2   | 1.3 | 0.4 | 1.3 | 0.3 |
| 4667 | 121a01 | BP383709 | HC061c05  |   |   | 153.5 | 169.0 | 129.9 | 1.1 | 0.1 | 1.3 | 0.1 |
| 4668 | 170b01 | BP097252 | MXL072e10 |   |   | 11.2  | 10.5  | 8.2   | 0.9 | 0.3 | 1.3 | 0.3 |
| 4669 | 143e12 | AV625811 | LC098b06  |   |   | 7.9   | 9.4   | 7.2   | 1.3 | 0.7 | 1.3 | 0.2 |
| 4670 | 154c03 | AV630865 | LCL085d08 |   |   | 7.3   | 7.7   | 5.9   | 1.2 | 0.4 | 1.3 | 0.3 |
| 4671 | 020d12 | AV621088 | LC031a11  |   |   | 25.7  | 26.7  | 20.9  | 1.0 | 0.1 | 1.3 | 0.3 |
| 4672 | 129d11 | AV642870 | HCL059f04 |   |   | 7.2   | 6.3   | 5.0   | 0.9 | 0.2 | 1.3 | 0.3 |
| 4673 | 140g03 | AV624057 | LC072d01  |   |   | 30.2  | 27.8  | 25.9  | 0.9 | 0.1 | 1.3 | 0.5 |
| 4674 | 115f09 | AV391292 | CM090a09  |   |   | 9.4   | 7.3   | 5.7   | 0.8 | 0.1 | 1.3 | 0.2 |
| 4675 | 023g04 | AV626059 | LCL001g11 |   |   | 7.0   | 9.7   | 7.9   | 1.4 | 0.5 | 1.3 | 0.4 |
| 4676 | 172e06 | BP098413 | MXL093a10 |   |   | 8.9   | 18.8  | 16.6  | 2.1 | 0.2 | 1.3 | 0.8 |
| 4677 | 132e02 | AV644701 | HCL092e10 |   |   | 21.0  | 22.4  | 17.6  | 1.1 | 0.1 | 1.3 | 0.2 |
| 4678 | 160g01 | BP089192 | MX202e10  |   |   | 5.7   | 9.0   | 8.6   | 1.5 | 0.9 | 1.3 | 1.2 |
| 4679 | 141e09 | AV624577 | LC079f03  |   |   | 12.6  | 15.9  | 14.1  | 1.2 | 0.4 | 1.3 | 0.8 |
| 4680 | 129g11 | AV643048 | HCL062h04 |   |   | 7.5   | 8.4   | 6.6   | 1.1 | 0.3 | 1.3 | 0.4 |
| 4681 | 122d04 | AV638177 | HC082h06  |   |   | 97.8  | 99.9  | 81.2  | 1.0 | 0.1 | 1.3 | 0.3 |
| 4682 | 138a07 | AV622053 | LC044d08  |   |   | 31.8  | 31.1  | 24.3  | 1.0 | 0.1 | 1.3 | 0.2 |
| 4683 | 135f11 | AV620164 | LC018e02  |   |   | 17.2  | 24.5  | 19.0  | 1.4 | 0.3 | 1.3 | 0.5 |
| 4684 | 160f07 | BP089097 | MX104g04  |   |   | 246.5 | 319.0 | 245.6 | 1.3 | 0.1 | 1.3 | 0.2 |
| 4685 | 104e06 | AV395773 | CL50h07   |   |   | 25.7  | 21.1  | 16.6  | 0.9 | 0.3 | 1.3 | 0.4 |
| 4686 | 132f12 | AV644803 | HCL094a06 |   |   | 17.7  | 20.2  | 15.7  | 1.1 | 0.1 | 1.3 | 0.1 |
| 4687 | 134g08 | AV619529 | LC009f01  |   |   | 10.8  | 12.2  | 9.5   | 1.1 | 0.1 | 1.3 | 0.2 |
| 4688 | 134b12 | AV619095 | LC003f12  |   |   | 330.7 | 360.7 | 283.7 | 1.1 | 0.1 | 1.3 | 0.1 |
| 4689 | 101d08 | AV393447 | CL07d04   |   |   | 3.1   | 3.9   | 3.4   | 1.4 | 0.3 | 1.3 | 0.7 |
| 4690 | 008a04 | AV392649 | CM062h02  |   |   | 8.7   | 9.8   | 7.6   | 1.1 | 0.2 | 1.3 | 0.2 |
| 4691 | 129e04 | AV642895 | HCL060b01 |   |   | 10.8  | 16.1  | 12.5  | 1.5 | 0.1 | 1.3 | 0.1 |
| 4692 | 003h04 | AV397227 | CL78e11   |   |   | 6.3   | 7.4   | 6.0   | 1.2 | 0.1 | 1.3 | 0.4 |
| 4693 | 117h05 | AV633211 | HC018b03  |   |   | 4.0   | 4.9   | 4.1   | 1.2 | 0.1 | 1.3 | 0.4 |
| 4694 | 122h01 | AV638958 | HC093b03  |   |   | 6.0   | 5.8   | 4.6   | 1.0 | 0.4 | 1.3 | 0.2 |
| 4695 | 156e07 | BP086177 | MX003d05  |   |   | 19.1  | 25.5  | 19.7  | 1.3 | 0.1 | 1.3 | 0.4 |
| 4696 | 107d10 | AV397691 | CM009g06  |   |   | 10.0  | 13.8  | 10.8  | 1.4 | 0.1 | 1.3 | 0.1 |
| 4697 | 121g09 | AV637525 | HC074b11  |   |   | 107.5 | 98.9  | 78.8  | 0.9 | 0.1 | 1.3 | 0.4 |
| 4698 | 111a08 | AV390162 | CM042g10  |   |   | 24.8  | 20.6  | 16.1  | 0.9 | 0.3 | 1.3 | 0.1 |
| 4699 | 161d08 | BP093143 | MXL004a09 |   |   | 55.0  | 38.7  | 30.1  | 0.7 | 0.2 | 1.3 | 0.1 |
| 4700 | 027a01 | AV628716 | LCL046b03 |   |   | 3.8   | 4.5   | 3.5   | 1.2 | 0.5 | 1.3 | 0.4 |
| 4701 | 148a12 | AV627840 | LCL032g06 |   |   | 9.4   | 7.6   | 6.4   | 0.8 | 0.1 | 1.3 | 0.5 |
| 4702 | 112e01 | AV391907 | CM057d02  |   |   | 37.5  | 59.5  | 49.1  | 1.6 | 0.2 | 1.3 | 0.5 |
| 4703 | 110g11 | AV389830 | CM040c05  |   |   | 7.7   | 7.3   | 5.7   | 1.0 | 0.2 | 1.3 | 0.1 |
| 4704 | 012c03 | AV636382 | HC058g07  |   |   | 8.2   | 7.4   | 5.8   | 0.9 | 0.1 | 1.3 | 0.2 |
| 4705 | 013b10 |          |           |   |   |       |       |       |     |     |     |     |

|      | A      | B        | C         | D | E | F     | G     | H     | I   | J   | K   | L   |
|------|--------|----------|-----------|---|---|-------|-------|-------|-----|-----|-----|-----|
| 4706 | 140f07 | AV623978 | LC071c09  |   |   | 41.5  | 36.2  | 29.0  | 0.9 | 0.2 | 1.3 | 0.3 |
| 4707 | 106d03 | AV397232 | CL78h01   |   |   | 15.6  | 16.2  | 13.0  | 1.1 | 0.2 | 1.3 | 0.3 |
| 4708 | 009c11 | AV390932 | CM088a09  |   |   | 5.7   | 5.1   | 4.0   | 0.9 | 0.2 | 1.3 | 0.2 |
| 4709 | 143b03 | BP383827 | LC094h09  |   |   | 15.0  | 12.6  | 10.3  | 0.8 | 0.1 | 1.3 | 0.5 |
| 4710 | 126c10 | AV641183 | HCL029d05 |   |   | 7.1   | 7.2   | 5.7   | 1.0 | 0.1 | 1.3 | 0.1 |
| 4711 | 015f03 | AV641254 | HCL030e09 |   |   | 23.2  | 39.3  | 31.1  | 1.7 | 0.3 | 1.3 | 0.2 |
| 4712 | 171c06 | BP097817 | MXL081g08 |   |   | 54.7  | 66.9  | 51.1  | 1.2 | 0.3 | 1.3 | 0.3 |
| 4713 | 109d05 | AV388097 | CM025g01  |   |   | 25.6  | 43.3  | 34.1  | 1.7 | 0.4 | 1.3 | 0.4 |
| 4714 | 135g09 | AV620228 | LC019c08  |   |   | 8.3   | 9.2   | 7.2   | 1.1 | 0.2 | 1.3 | 0.1 |
| 4715 | 003a10 | AV395979 | CL53g08   |   |   | 7.2   | 6.3   | 5.0   | 0.9 | 0.1 | 1.3 | 0.3 |
| 4716 | 122e03 | AV638397 | HC085h04  |   |   | 8.5   | 7.4   | 6.7   | 0.9 | 0.2 | 1.3 | 0.7 |
| 4717 | 110c11 | AV389172 | CM035c10  |   |   | 7.3   | 6.7   | 5.2   | 0.9 | 0.2 | 1.3 | 0.2 |
| 4718 | 014g01 | AV640337 | HCL014d12 |   |   | 11.8  | 15.9  | 14.1  | 1.5 | 0.4 | 1.3 | 0.7 |
| 4719 | 134d05 | AV619210 | LC005b10  |   |   | 11.8  | 11.1  | 9.1   | 1.0 | 0.4 | 1.3 | 0.4 |
| 4720 | 127f05 | AV641924 | HCL042e07 |   |   | 7.6   | 6.8   | 5.5   | 0.9 | 0.1 | 1.3 | 0.3 |
| 4721 | 125c09 | AV640531 | HCL017h06 |   |   | 9.5   | 12.1  | 9.8   | 1.3 | 0.4 | 1.3 | 0.3 |
| 4722 | 132h08 | AV644866 | HCL094h02 |   |   | 16.7  | 21.9  | 19.3  | 1.3 | 0.2 | 1.3 | 0.5 |
| 4723 | 103c04 | AV394989 | CL33e02   |   |   | 6.5   | 7.8   | 6.4   | 1.2 | 0.2 | 1.3 | 0.4 |
| 4724 | 029a02 | AV630450 | LCL079a08 |   |   | 41.8  | 26.1  | 20.5  | 0.6 | 0.1 | 1.3 | 0.1 |
| 4725 | 140h09 | BP383812 | LC073e07  |   |   | 41.8  | 76.2  | 59.9  | 1.9 | 0.4 | 1.3 | 0.2 |
| 4726 | 030g06 | BP086138 | MX002f02  |   |   | 61.0  | 52.0  | 43.6  | 0.8 | 0.2 | 1.3 | 0.9 |
| 4727 | 144c12 | AV626233 | LCL004g12 |   |   | 13.4  | 17.1  | 13.4  | 1.3 | 0.3 | 1.3 | 0.2 |
| 4728 | 143d12 | AV625718 | LC096h02  |   |   | 4.3   | 5.8   | 4.6   | 1.4 | 0.3 | 1.3 | 0.3 |
| 4729 | 171c01 | BP097794 | MXL081d12 |   |   | 21.0  | 19.6  | 15.4  | 1.0 | 0.3 | 1.3 | 0.1 |
| 4730 | 112d09 | AV391832 | CM056g02  |   |   | 127.3 | 138.7 | 110.7 | 1.1 | 0.1 | 1.3 | 0.6 |
| 4731 | 011a06 | AV634045 | HC028e08  |   |   | 95.2  | 60.0  | 53.0  | 0.6 | 0.3 | 1.3 | 1.0 |
| 4732 | 111a06 | AV390110 | CM042e03  |   |   | 17.6  | 16.8  | 13.4  | 1.0 | 0.2 | 1.3 | 0.2 |
| 4733 | 122e09 | AV638514 | HC087c12  |   |   | 10.1  | 9.2   | 8.4   | 0.9 | 0.3 | 1.3 | 0.7 |
| 4734 | 110f12 | AV389712 | CM039c06  |   |   | 13.7  | 14.2  | 11.2  | 1.1 | 0.2 | 1.3 | 0.1 |
| 4735 | 030d02 | AV631575 | LCL096d05 |   |   | 6.5   | 6.2   | 5.4   | 1.0 | 0.3 | 1.3 | 0.5 |
| 4736 | 033d02 | BP094339 | MXL021e02 |   |   | 11.4  | 12.0  | 10.1  | 1.0 | 0.2 | 1.3 | 0.6 |
| 4737 | 027a09 | AV628782 | LCL047a05 |   |   | 6.1   | 4.9   | 4.2   | 0.8 | 0.2 | 1.3 | 0.6 |
| 4738 | 160h07 | BP089397 | MX206e07  |   |   | 3.5   | 5.7   | 6.8   | 1.5 | 1.4 | 1.3 | 1.4 |
| 4739 | 109f03 | AV387735 | CM028b02  |   |   | 15.0  | 13.7  | 11.0  | 0.9 | 0.1 | 1.3 | 0.3 |
| 4740 | 115d05 | AV390982 | CM087b02  |   |   | 61.5  | 76.0  | 59.6  | 1.3 | 0.1 | 1.3 | 0.1 |
| 4741 | 026b07 | AV628133 | LCL037c04 |   |   | 15.3  | 22.0  | 18.3  | 1.4 | 0.3 | 1.3 | 0.3 |
| 4742 | 147a10 | AV627369 | LCL025g03 |   |   | 24.3  | 24.1  | 20.9  | 1.0 | 0.2 | 1.3 | 0.7 |
| 4743 | 137b08 | AV621251 | LCL033d09 |   |   | 8.3   | 5.6   | 4.8   | 0.8 | 0.3 | 1.3 | 0.4 |
| 4744 | 123d07 | AV639560 | HCL001a06 |   |   | 799.6 | 995.0 | 797.3 | 1.2 | 0.0 | 1.3 | 0.5 |
| 4745 | 004c08 | AV386848 | CM005a01  |   |   | 50.9  | 47.7  | 35.8  | 0.9 | 0.2 | 1.3 | 0.2 |
| 4746 | 141e01 | AV624515 | LC078g08  |   |   | 22.9  | 40.0  | 33.1  | 1.8 | 0.3 | 1.3 | 0.4 |
| 4747 | 023f07 | AV625308 | LC090g02  |   |   | 8.4   | 7.2   | 5.7   | 0.9 | 0.1 | 1.3 | 0.2 |
| 4748 | 035g01 | BP097309 | MXL073d11 |   |   | 14.1  | 12.3  | 9.7   | 0.9 | 0.1 | 1.3 | 0.2 |
| 4749 | 120c02 | AV635897 | HC052d06  |   |   | 6.4   | 7.1   | 5.7   | 1.1 | 0.2 | 1.3 | 0.3 |
| 4750 | 143e08 | AV625789 | LC097h03  |   |   | 9.4   | 12.5  | 10.5  | 1.3 | 0.1 | 1.3 | 0.4 |
| 4751 | 126g07 | AV641460 | HCL034a08 |   |   | 14.2  | 14.3  | 11.4  | 1.2 | 0.7 | 1.3 | 0.5 |
| 4752 | 120a01 | AV635638 | HC048h09  |   |   | 57.1  | 48.9  | 46.4  | 0.9 | 0.2 | 1.3 | 0.6 |
| 4753 | 143b06 | AV625609 | LC095d06  |   |   | 6.8   | 7.0   | 5.5   | 1.1 | 0.4 | 1.3 | 0.2 |
| 4754 | 148g11 | AV628208 | LCL038d10 |   |   | 4.2   | 7.3   | 5.6   | 1.8 | 0.8 | 1.3 | 0.3 |
| 4755 | 138c09 | AV622194 | LC046d08  |   |   | 5.5   | 10.0  | 8.0   | 1.8 | 0.4 | 1.3 | 0.1 |
| 4756 | 023d02 | AV625003 | LC085i06  |   |   | 14.5  | 14.9  | 11.6  | 1.0 | 0.2 | 1.3 | 0.1 |
| 4757 | 143g05 | AV625936 | LC100a07  |   |   | 10.6  | 16.7  | 12.9  | 1.5 | 0.3 | 1.3 | 0.6 |
| 4758 | 012g10 | AV637420 | HC072h12  |   |   | 4.8   | 7.2   | 5.7   | 1.5 | 0.5 | 1.3 | 0.7 |
| 4759 | 102a01 | AV394097 | CL17d11   |   |   | 1.0   | 1.3   | 1.4   | 1.4 | 0.6 | 1.3 | 1.1 |
| 4760 | 101f01 | AV393766 | CL11d05   |   |   | 12.8  | 23.3  | 21.2  | 1.8 | 0.5 | 1.3 | 0.5 |
| 4761 | 128b10 | AV642218 | HCL047f10 |   |   | 8.6   | 8.8   | 7.4   | 1.0 | 0.1 | 1.3 | 0.3 |
| 4762 | 146a11 | AV626984 | LCL019d01 |   |   | 20.7  | 17.2  | 13.6  | 0.8 | 0.1 | 1.3 | 0.3 |
| 4763 | 026g06 | AV628549 | LCL043f03 |   |   | 30.3  | 32.1  | 28.5  | 1.1 | 0.2 | 1.3 | 0.5 |
| 4764 | 108f05 | AV387946 | CM021a05  |   |   | 7.5   | 9.9   | 7.7   | 1.3 | 0.4 | 1.3 | 0.4 |
| 4765 | 115c11 | AV390163 | CM086e04  |   |   | 12.3  | 11.5  | 9.3   | 0.9 | 0.1 | 1.3 | 0.3 |
| 4766 | 125d12 | AV640633 | HCL019e11 |   |   | 29.7  | 32.4  | 25.6  | 1.1 | 0.1 | 1.3 | 0.1 |
| 4767 | 121f03 | AV637325 | HC071f09  |   |   | 6.3   | 8.2   | 6.7   | 1.3 | 0.3 | 1.3 | 0.4 |
| 4768 | 123a10 | BP383722 | HC097a12  |   |   | 25.7  | 20.6  | 16.4  | 0.8 | 0.1 | 1.3 | 0.2 |
| 4769 | 135h11 | AV620363 | LC021b04  |   |   | 10.9  | 16.6  | 13.3  | 1.5 | 0.4 | 1.3 | 0.5 |
| 4770 | 136b08 | AV620508 | LC023a10  |   |   | 6.5   | 5.8   | 5.0   | 0.9 | 0.2 | 1.3 | 0.6 |
| 4771 | 139c08 | AV622979 | LC057c11  |   |   | 7.5   | 7.4   | 5.9   | 1.0 | 0.1 | 1.3 | 0.4 |
| 4772 | 032h07 | BP093743 | MXL012h12 |   |   | 15.3  | 13.0  | 11.9  | 0.9 | 0.1 | 1.3 | 0.6 |
| 4773 | 166d05 | BP095619 | MXL044f10 |   |   | 6.5   | 17.5  | 14.2  | 2.7 | 0.3 | 1.3 | 0.3 |
| 4774 | 170c11 | BP097357 | MXL074d08 |   |   | 16.5  | 22.5  | 17.3  | 1.3 | 0.5 | 1.3 | 0.5 |
| 4775 | 012f03 | AV637107 | HC068g12  |   |   | 7.1   | 7.7   | 6.1   | 1.2 | 0.6 | 1.3 | 0.1 |
| 4776 | 142b01 | AV624912 | LC084d10  |   |   | 23.8  | 19.4  | 15.5  | 0.8 | 0.2 | 1.3 | 0.3 |
| 4777 | 145d05 | AV626661 | LCL013b08 |   |   | 14.6  | 12.8  | 10.4  | 0.9 | 0.3 | 1.3 | 0.4 |
| 4778 | 117a06 | AV632094 | HC003h01  |   |   | 8.0   | 9.6   | 7.6   | 1.2 | 0.5 | 1.3 | 0.2 |
| 4779 | 016e05 | AV642277 | HCL048h04 |   |   | 0.8   | 1.4   | 1.3   | 2.0 | 1.1 | 1.3 | 0.6 |
| 4780 | 103h12 | AV395541 | CL43c09   |   |   | 5.0   | 3.7   | 3.0   | 0.7 | 0.2 | 1.3 | 0.8 |
| 4781 | 134f07 | AV619448 | LC008e03  |   |   | 79.6  | 110.4 | 87.7  | 1.4 | 0.4 | 1.3 | 0.1 |
| 4782 | 157c07 | BP086773 | MX016d10  |   |   | 10.6  | 11.4  | 9.2   | 1.1 | 0.4 | 1.3 | 0.3 |
| 4783 | 022g05 | AV624188 | LC074b08  |   |   | 14.6  | 21.5  | 18.7  | 1.5 | 0.2 | 1.3 | 0.4 |
| 4784 | 147c08 | AV627470 | LCL027c03 |   |   | 25.3  | 26.9  | 21.3  | 1.1 | 0.2 | 1.3 | 0.1 |
| 4785 | 157e08 | BP087021 | MX023a08  |   |   | 6.4   | 9.4   | 7.3   | 1.5 | 0.5 | 1.3 | 0.4 |
| 4786 | 144b01 | AV626133 | LCL002h07 |   |   | 12.4  | 9.1   | 7.2   | 0.7 | 0.1 | 1.3 | 0.2 |
| 4787 | 033h04 | BP095027 | MXL034f10 |   |   | 8.1   | 8.1   | 6.9   | 1.0 | 0.2 | 1.3 | 0.5 |
| 4788 | 154b10 | AV630845 | LCL085b01 |   |   | 6.7   | 7.0   | 5.5   | 1.1 | 0.3 | 1.3 | 0.2 |
| 4789 | 113d01 | AV393010 | CM066g03  |   |   | 63.2  | 127.2 | 102.0 | 2.0 | 0.2 | 1.3 | 0.2 |
| 4790 | 115a05 | AV390270 | CM082h07  |   |   | 23.9  | 24.5  | 19.4  | 1.0 | 0.2 | 1.3 | 0.3 |
| 4791 | 151b02 | AV629339 | LCL056h03 |   |   | 17.7  | 16.4  | 12.9  | 0.9 | 0.2 | 1.3 | 0.1 |
| 4792 | 138g06 | AV622559 | LC051c03  |   |   | 5.7   | 7.3   | 6.2   | 1.3 | 0.5 | 1.3 | 0.5 |
| 4793 | 117b07 | AV632288 | HC006c12  |   |   | 4.8   | 4.4   | 3.6   | 0.9 | 0.2 | 1.3 | 0.2 |
| 4794 | 022e05 | AV623942 | LC070g07  |   |   | 16.2  | 22.2  | 17.8  | 1.4 | 0.1 | 1.3 | 0.1 |
| 4795 | 110b11 | AV388991 | CM034b07  |   |   | 5.3   | 5.5   | 4.4   | 1.0 | 0.1 | 1.3 | 0.4 |
| 4796 | 025c05 | AV627219 | LCL022h06 |   |   | 15.9  | 15.7  | 12.6  | 1.0 | 0.2 | 1.3 | 0.1 |
| 4797 | 153d03 | AV630464 | LCL079c03 |   |   | 16.1  | 15.5  | 12.0  | 1.0 | 0.2 | 1.3 | 0.2 |
| 4798 | 120a09 | AV635692 | HC049f03  |   |   | 176.6 | 206.3 | 162.6 | 1.2 | 0.1 | 1.3 | 0.1 |
| 4799 | 025b09 | AV627146 | LCL021g12 |   |   | 13.7  | 14.0  | 11.0  | 1.0 | 0.2 | 1.3 | 0.1 |
| 4800 | 107g01 | AV387178 | CM012a04  |   |   | 17.6  | 24.7  | 19.6  | 1.6 | 0.8 | 1.3 | 0.3 |
| 4801 | 011h04 | AV635672 | HC049d04  |   |   | 79.7  | 84.5  | 68.5  | 1.1 | 0.3 | 1.3 | 0.4 |
| 4802 | 010d05 | AV632683 | HC011c07  |   |   | 14.1  | 28.0  | 22.0  | 2.1 | 0.6 | 1.3 | 0.2 |
| 4803 | 142e03 | AV625192 | LC089b01  |   |   | 16.0  | 14.5  | 11.5  | 0.9 | 0.2 | 1.3 | 0.1 |
| 4804 | 014h04 | AV640485 | HCL017b01 |   |   | 8.8   | 9.6   | 7.6   | 1.1 | 0.2 | 1.3 | 0.1 |
| 4805 | 133a02 | AV644873 | HCL094h10 |   |   | 13.7  | 12.3  | 9.9   | 1.0 | 0.3 | 1.3 | 0.2 |
| 4806 | 007a06 | AV390980 | CM049c12  |   |   | 14.3  | 16.9  | 15.2  | 1.2 | 0.1 | 1.3 | 0.5 |
| 4807 | 138f12 | AV622513 | LC050f09  |   |   | 16.9  | 20.8  | 16.3  | 1.3 | 0.3 | 1.3 | 0.2 |
| 4808 | 031f12 | BP087272 | MX030a09  |   |   | 7.2   | 9.8   | 8.0   | 1.4 | 0.1 | 1.3 | 0.2 |
| 4809 | 105d08 | AV396507 | CL63b10   |   |   | 33.1  | 32.9  | 26.0  | 1.0 | 0.2 | 1.3 | 0.2 |
| 4810 | 119c06 | AV634839 | HC038f06  |   |   | 112.8 | 161.8 | 137.8 | 1.4 | 0.4 | 1.3 | 0.3 |
| 4811 | 121d09 | AV637131 | HC069b08  |   |   | 185.4 | 185.0 | 144.3 | 1.0 | 0.2 | 1.3 | 0.1 |
| 4812 | 028h10 | AV63     |           |   |   |       |       |       |     |     |     |     |

|      | A      | B        | C         | D | E | F      | G      | H     | I   | J   | K   | L   |
|------|--------|----------|-----------|---|---|--------|--------|-------|-----|-----|-----|-----|
| 4813 | 126g10 | AV641474 | HCL034c06 |   |   | 9.3    | 10.3   | 8.2   | 1.1 | 0.1 | 1.3 | 0.2 |
| 4814 | 113a11 | AV392716 | CM063c12  |   |   | 14.4   | 22.8   | 19.1  | 1.6 | 0.3 | 1.3 | 0.4 |
| 4815 | 146d12 | AV627108 | LCL021c03 |   |   | 6.1    | 5.9    | 4.6   | 0.9 | 0.2 | 1.3 | 0.2 |
| 4816 | 167d02 | BP096005 | MXL050h06 |   |   | 6.3    | 17.1   | 12.5  | 2.5 | 1.9 | 1.3 | 1.0 |
| 4817 | 010c04 | AV632474 | HC008f10  |   |   | 13.7   | 10.0   | 8.9   | 0.7 | 0.3 | 1.3 | 0.7 |
| 4818 | 115d03 | AV390972 | CM086h05  |   |   | 4.5    | 6.1    | 4.8   | 1.4 | 0.3 | 1.3 | 0.1 |
| 4819 | 134a09 | AV618967 | LCO02a03  |   |   | 82.2   | 78.8   | 75.8  | 1.0 | 0.2 | 1.3 | 0.6 |
| 4820 | 145e04 | AV626721 | LCL014c10 |   |   | 20.9   | 21.7   | 17.3  | 1.0 | 0.2 | 1.3 | 0.1 |
| 4821 | 118e03 | AV633816 | HC025f06  |   |   | 3.7    | 3.8    | 3.0   | 1.0 | 0.1 | 1.3 | 0.2 |
| 4822 | 013d02 | AV638597 | HC088d04  |   |   | 20.9   | 34.8   | 27.8  | 1.7 | 0.3 | 1.3 | 0.1 |
| 4823 | 138e11 | BP383798 | LCO48e06  |   |   | 126.4  | 140.2  | 122.9 | 1.1 | 0.1 | 1.3 | 0.4 |
| 4824 | 140e07 | AV623886 | LC070a09  |   |   | 9.6    | 25.7   | 20.4  | 2.8 | 0.6 | 1.3 | 0.1 |
| 4825 | 134g01 | AV619489 | LCO09a05  |   |   | 6.7    | 9.4    | 7.9   | 1.4 | 0.3 | 1.3 | 0.5 |
| 4826 | 139e08 | AV623164 | LC059g11  |   |   | 88.7   | 82.0   | 77.8  | 0.9 | 0.1 | 1.3 | 0.7 |
| 4827 | 107h02 | AV387083 | CM013d08  |   |   | 9.3    | 7.5    | 6.1   | 0.8 | 0.1 | 1.3 | 0.2 |
| 4828 | 130h01 | AV643717 | HCL074g01 |   |   | 4.5    | 4.7    | 3.7   | 1.1 | 0.4 | 1.3 | 0.1 |
| 4829 | 113b09 | AV392838 | CM064f09  |   |   | 11.2   | 12.3   | 9.7   | 1.1 | 0.2 | 1.3 | 0.2 |
| 4830 | 107d04 | AV397669 | CM009d04  |   |   | 33.6   | 24.4   | 21.8  | 0.7 | 0.2 | 1.3 | 0.6 |
| 4831 | 110d03 | AV389200 | CM035e09  |   |   | 41.8   | 47.9   | 43.9  | 1.2 | 0.2 | 1.3 | 0.5 |
| 4832 | 147a06 | AV627347 | LCL025d03 |   |   | 17.9   | 14.5   | 11.8  | 0.8 | 0.1 | 1.3 | 0.3 |
| 4833 | 141b03 | AV624306 | LC075h03  |   |   | 136.8  | 113.3  | 91.2  | 0.8 | 0.1 | 1.3 | 0.1 |
| 4834 | 133f04 | AV645135 | HCL098f09 |   |   | 9.3    | 17.7   | 14.4  | 1.9 | 0.4 | 1.3 | 0.3 |
| 4835 | 034d03 | BP095685 | MXL045g08 |   |   | 8.6    | 7.1    | 6.6   | 0.8 | 0.2 | 1.3 | 0.7 |
| 4836 | 131a07 | AV643829 | HCL076g09 |   |   | 7.2    | 6.4    | 5.0   | 0.9 | 0.2 | 1.3 | 0.3 |
| 4837 | 103b08 | AV394859 | CL32e08   |   |   | 5.6    | 6.6    | 5.7   | 1.2 | 0.4 | 1.3 | 0.4 |
| 4838 | 122e11 | AV638536 | HC087f03  |   |   | 5.0    | 5.4    | 4.4   | 1.1 | 0.2 | 1.3 | 0.3 |
| 4839 | 153g10 | AV630667 | LCL082d08 |   |   | 9.5    | 10.4   | 8.3   | 1.1 | 0.4 | 1.3 | 0.3 |
| 4840 | 137b05 | AV621223 | LC032h10  |   |   | 10.2   | 11.9   | 9.8   | 1.2 | 0.3 | 1.3 | 0.4 |
| 4841 | 011e03 | AV634934 | HC039h01  |   |   | 238.7  | 287.2  | 233.1 | 1.2 | 0.3 | 1.3 | 0.2 |
| 4842 | 129a10 | AV642654 | HCL055d12 |   |   | 109.5  | 76.5   | 64.0  | 0.7 | 0.1 | 1.3 | 0.5 |
| 4843 | 131b07 | AV643891 | HCL077h07 |   |   | 12.6   | 27.4   | 21.7  | 2.3 | 0.8 | 1.3 | 0.3 |
| 4844 | 130d12 | AV643480 | HCL070d03 |   |   | 21.9   | 23.8   | 19.1  | 1.1 | 0.1 | 1.3 | 0.2 |
| 4845 | 136h08 | AV620981 | LC029e08  |   |   | 8.5    | 9.0    | 7.2   | 1.1 | 0.2 | 1.3 | 0.0 |
| 4846 | 120e09 | AV636122 | HC055d11  |   |   | 8.3    | 8.8    | 7.2   | 1.1 | 0.1 | 1.3 | 0.4 |
| 4847 | 033f12 | BP094764 | MXL029a07 |   |   | 44.2   | 41.0   | 35.4  | 0.9 | 0.2 | 1.3 | 0.5 |
| 4848 | 106e01 | AV397349 | CL80g11   |   |   | 65.2   | 97.9   | 80.4  | 1.7 | 0.6 | 1.3 | 0.3 |
| 4849 | 007h10 | AV392532 | CM062b09  |   |   | 5.3    | 5.4    | 4.6   | 1.0 | 0.4 | 1.3 | 0.7 |
| 4850 | 152h05 | AV630228 | LCL075g05 |   |   | 49.4   | 48.2   | 40.6  | 1.0 | 0.1 | 1.3 | 0.3 |
| 4851 | 122c06 | BP383718 | HC080h06  |   |   | 148.2  | 222.7  | 180.7 | 1.6 | 0.6 | 1.3 | 0.2 |
| 4852 | 142g06 | AV625407 | LC092b04  |   |   | 110.1  | 102.0  | 96.5  | 0.9 | 0.2 | 1.3 | 0.8 |
| 4853 | 022a07 | AV623351 | LC062e04  |   |   | 9.2    | 6.6    | 5.3   | 0.7 | 0.1 | 1.3 | 0.2 |
| 4854 | 109c08 | AV388123 | CM025c08  |   |   | 4.4    | 4.1    | 3.4   | 1.0 | 0.4 | 1.3 | 0.3 |
| 4855 | 027g04 | AV629406 | LCL058b12 |   |   | 7.9    | 9.1    | 7.7   | 1.1 | 0.3 | 1.3 | 0.4 |
| 4856 | 140e06 | AV623884 | LC070a07  |   |   | 5.4    | 7.0    | 5.6   | 1.3 | 0.4 | 1.3 | 0.3 |
| 4857 | 153h08 | AV630717 | LCL083b09 |   |   | 30.1   | 34.1   | 27.6  | 1.1 | 0.1 | 1.3 | 0.2 |
| 4858 | 152c11 | AV629912 | LCL068h06 |   |   | 3.6    | 3.8    | 3.2   | 1.1 | 0.3 | 1.3 | 0.4 |
| 4859 | 116b08 | AV392485 | CM097b08  |   |   | 10.6   | 9.2    | 7.4   | 0.9 | 0.2 | 1.3 | 0.2 |
| 4860 | 138b02 | AV622090 | LC044h04  |   |   | 1516.2 | 1213.8 | 981.6 | 0.8 | 0.1 | 1.3 | 0.3 |
| 4861 | 171e10 | BP097983 | MXL084f09 |   |   | 166.3  | 188.2  | 166.5 | 1.2 | 0.2 | 1.3 | 0.4 |
| 4862 | 166e10 | BP095704 | MXL046b02 |   |   | 10.2   | 11.7   | 9.4   | 1.2 | 0.2 | 1.3 | 0.3 |
| 4863 | 150c01 | AV628924 | LCL049a10 |   |   | 8.2    | 6.9    | 5.8   | 0.8 | 0.2 | 1.3 | 0.6 |
| 4864 | 135f06 | AV620109 | LC017f09  |   |   | 19.9   | 17.2   | 16.7  | 0.8 | 0.1 | 1.3 | 0.8 |
| 4865 | 031f03 | BP087169 | MX027b06  |   |   | 9.3    | 10.9   | 9.0   | 1.2 | 0.2 | 1.3 | 0.2 |
| 4866 | 106c07 | AV397293 | CL77c04   |   |   | 5.0    | 5.2    | 4.2   | 1.1 | 0.2 | 1.3 | 0.2 |
| 4867 | 149a08 | AV628322 | LCL040b01 |   |   | 12.2   | 11.9   | 9.5   | 1.0 | 0.2 | 1.3 | 0.3 |
| 4868 | 013g02 | AV639305 | HC097f05  |   |   | 19.4   | 30.8   | 25.3  | 1.6 | 0.3 | 1.3 | 0.3 |
| 4869 | 169c04 | BP096886 | MXL066e01 |   |   | 13.1   | 22.5   | 19.2  | 1.8 | 0.4 | 1.3 | 0.3 |
| 4870 | 148e07 | AV628059 | LCL036b01 |   |   | 21.8   | 37.5   | 32.8  | 1.7 | 0.1 | 1.3 | 0.4 |
| 4871 | 001a03 | AV393312 | CL01d04   |   |   | 15.4   | 12.6   | 10.1  | 0.8 | 0.2 | 1.3 | 0.3 |
| 4872 | 140h04 | BP383811 | LC073b12  |   |   | 1229.5 | 1003.5 | 846.3 | 0.8 | 0.1 | 1.3 | 0.3 |
| 4873 | 033f07 | BP094683 | MXL027c03 |   |   | 11.0   | 15.3   | 15.1  | 1.4 | 0.3 | 1.3 | 0.8 |
| 4874 | 104a06 | AV395538 | CL43h01   |   |   | 64.9   | 70.3   | 58.3  | 1.1 | 0.1 | 1.3 | 0.4 |
| 4875 | 138b12 | AV622140 | LC045f07  |   |   | 119.7  | 142.2  | 120.5 | 1.2 | 0.2 | 1.3 | 0.3 |
| 4876 | 138h12 | AV622731 | LCO53f12  |   |   | 5.0    | 5.1    | 4.2   | 1.0 | 0.1 | 1.3 | 0.4 |
| 4877 | 028e03 | AV630036 | LCL071g04 |   |   | 3.1    | 2.5    | 3.2   | 0.9 | 0.2 | 1.3 | 1.3 |
| 4878 | 124h04 | AV640324 | HCL014c09 |   |   | 14.0   | 19.1   | 14.6  | 1.3 | 0.3 | 1.3 | 0.6 |
| 4879 | 108g11 | AV387836 | CM022a07  |   |   | 164.1  | 225.5  | 184.4 | 1.4 | 0.2 | 1.3 | 0.2 |
| 4880 | 108f04 | AV397477 | CM020g09  |   |   | 56.8   | 23.4   | 21.0  | 0.5 | 0.1 | 1.3 | 0.8 |
| 4881 | 005c11 | AV387884 | CM022c11  |   |   | 5.7    | 6.6    | 5.6   | 1.2 | 0.3 | 1.3 | 0.6 |
| 4882 | 121e02 | AV637172 | HC069g02  |   |   | 135.8  | 160.9  | 143.0 | 1.2 | 0.1 | 1.3 | 0.3 |
| 4883 | 120a03 | AV635646 | HC049a09  |   |   | 5.6    | 6.7    | 5.4   | 1.2 | 0.2 | 1.3 | 0.5 |
| 4884 | 110a03 | AV388740 | CM031h02  |   |   | 27.3   | 53.0   | 42.3  | 2.2 | 0.8 | 1.3 | 0.1 |
| 4885 | 125f05 | AV640718 | HCL021c03 |   |   | 90.0   | 61.7   | 49.1  | 0.7 | 0.2 | 1.3 | 0.1 |
| 4886 | 008b03 | AV392919 | CM065e12  |   |   | 14.0   | 8.4    | 6.8   | 0.7 | 0.2 | 1.3 | 0.3 |
| 4887 | 111d03 | AV390490 | CM046f10  |   |   | 7.0    | 8.2    | 6.9   | 1.2 | 0.3 | 1.3 | 0.4 |
| 4888 | 147e04 | AV627563 | LCL028f02 |   |   | 9.7    | 11.5   | 9.2   | 1.2 | 0.2 | 1.3 | 0.1 |
| 4889 | 018a08 | AV644098 | HCL081g08 |   |   | 4.9    | 8.2    | 6.8   | 1.8 | 0.5 | 1.3 | 0.4 |
| 4890 | 170c03 | BP097324 | MXL073g07 |   |   | 15.5   | 19.5   | 15.9  | 1.8 | 1.3 | 1.3 | 0.4 |
| 4891 | 012g01 | AV637289 | HC071b09  |   |   | 4.8    | 9.1    | 7.2   | 2.0 | 0.3 | 1.3 | 0.1 |
| 4892 | 025c02 | AV627204 | LCL022f07 |   |   | 5.6    | 5.0    | 4.5   | 0.9 | 0.2 | 1.3 | 0.6 |
| 4893 | 108a11 | AV387465 | CM016d07  |   |   | 5.4    | 7.7    | 6.3   | 1.5 | 0.4 | 1.3 | 0.3 |
| 4894 | 164e05 | BP094768 | MXL029b08 |   |   | 169.7  | 214.5  | 176.1 | 1.2 | 0.4 | 1.3 | 0.8 |
| 4895 | 004c03 | AV386691 | CM004e09  |   |   | 10.6   | 11.6   | 9.7   | 1.2 | 0.4 | 1.3 | 0.3 |
| 4896 | 141g08 | AV624738 | LC081h11  |   |   | 203.2  | 182.4  | 167.1 | 0.9 | 0.1 | 1.3 | 0.6 |
| 4897 | 034c02 | BP095498 | MXL042g04 |   |   | 41.7   | 39.6   | 31.7  | 1.0 | 0.1 | 1.3 | 0.1 |
| 4898 | 168f07 | BP096637 | MXL062b10 |   |   | 267.7  | 303.9  | 241.5 | 1.1 | 0.0 | 1.3 | 0.2 |
| 4899 | 105c04 | AV396374 | CL60d01   |   |   | 141.4  | 147.6  | 122.6 | 1.1 | 0.5 | 1.3 | 0.5 |
| 4900 | 019e05 | AV619976 | LC015g07  |   |   | 9.6    | 13.1   | 10.4  | 1.4 | 0.3 | 1.3 | 0.3 |
| 4901 | 111g04 | AV391086 | CM050h11  |   |   | 9.4    | 10.4   | 8.5   | 1.1 | 0.1 | 1.3 | 0.3 |
| 4902 | 113c11 | AV392996 | CM066e11  |   |   | 12.4   | 14.3   | 11.4  | 1.2 | 0.1 | 1.3 | 0.1 |
| 4903 | 123a12 | AV639265 | HC097b06  |   |   | 7.7    | 10.7   | 8.8   | 1.4 | 0.5 | 1.3 | 0.5 |
| 4904 | 144c01 | AV626174 | LCL003f03 |   |   | 9.8    | 9.3    | 7.8   | 0.9 | 0.3 | 1.3 | 0.6 |
| 4905 | 131c05 | AV643980 | HCL079e10 |   |   | 8.9    | 11.0   | 8.8   | 1.3 | 0.2 | 1.3 | 0.2 |
| 4906 | 146e07 | AV627129 | LCL021e11 |   |   | 15.5   | 20.6   | 16.3  | 1.3 | 0.3 | 1.3 | 0.2 |
| 4907 | 134a05 | AV618908 | LC001b12  |   |   | 6.6    | 5.9    | 4.7   | 0.9 | 0.2 | 1.3 | 0.3 |
| 4908 | 135h08 | AV620348 | LC020h05  |   |   | 7.5    | 9.6    | 7.7   | 1.3 | 0.3 | 1.3 | 0.3 |
| 4909 | 006b06 | AV389204 | CM035e11  |   |   | 11.6   | 12.3   | 10.0  | 1.1 | 0.1 | 1.3 | 0.3 |
| 4910 | 019f03 | AV620104 | LC017f04  |   |   | 5.1    | 6.9    | 5.7   | 1.4 | 0.1 | 1.3 | 0.3 |
| 4911 | 132b05 | AV644505 | HCL089f11 |   |   | 5.9    | 5.5    | 4.5   | 0.9 | 0.2 | 1.3 | 0.2 |
| 4912 | 153b03 | AV630320 | LCL077c01 |   |   | 10.6   | 10.4   | 8.5   | 1.0 | 0.2 | 1.3 | 0.2 |
| 4913 | 132e04 | AV644706 | HCL092f06 |   |   | 41.5   | 58.1   | 46.6  | 1.4 | 0.2 | 1.3 | 0.1 |
| 4914 | 118d03 | AV633714 | HC024d01  |   |   | 43.0   | 48.4   | 42.6  | 1.1 | 0.1 | 1.3 | 0.4 |
| 4915 | 027a04 | AV628750 | LCL046e12 |   |   | 67.6   | 63.0   | 59.8  | 0.9 | 0.2 | 1.3 | 0.7 |
| 4916 | 116c01 | AV393038 | CM097f12  |   |   | 2.7    | 4.5    | 3.8   | 1.7 | 0.2 | 1.3 | 0.3 |
| 4917 | 121c07 | AV636998 | HC067c01  |   |   | 7.9    | 6.5    | 6.0   | 0.8 | 0.2 | 1.3 | 0.6 |
| 4918 | 138c07 | AV622187 | LC046c10  |   |   | 4.8    | 4.1    | 3.5   | 0.9 | 0.3 | 1.3 | 0.4 |
| 4919 | 1      |          |           |   |   |        |        |       |     |     |     |     |

|      | A      | B        | C         | D | E | F     | G     | H     | I   | J   | K   | L   |
|------|--------|----------|-----------|---|---|-------|-------|-------|-----|-----|-----|-----|
| 4920 | 149d06 | AV628474 | LCL042d10 |   |   | 10.4  | 12.5  | 10.2  | 1.2 | 0.2 | 1.3 | 0.3 |
| 4921 | 006a03 | AV388799 | CM032f04  |   |   | 8.4   | 11.0  | 8.8   | 1.3 | 0.2 | 1.3 | 0.3 |
| 4922 | 133g03 | AV645188 | HCL099d04 |   |   | 4.8   | 5.9   | 4.8   | 1.2 | 0.2 | 1.3 | 0.2 |
| 4923 | 107e01 | AV397637 | CM009h08  |   |   | 9.9   | 19.3  | 16.1  | 2.0 | 0.5 | 1.3 | 0.3 |
| 4924 | 107c09 | AV386739 | CM008f10  |   |   | 6.7   | 6.5   | 5.8   | 1.0 | 0.2 | 1.3 | 0.4 |
| 4925 | 103b12 | AV394990 | CL33b06   |   |   | 2.9   | 2.9   | 2.8   | 1.2 | 0.5 | 1.3 | 0.7 |
| 4926 | 170b08 | BP097282 | MXL073a04 |   |   | 11.5  | 12.6  | 10.5  | 1.2 | 0.6 | 1.2 | 0.5 |
| 4927 | 136e09 | AV620751 | LC026d04  |   |   | 14.4  | 12.9  | 10.6  | 0.9 | 0.1 | 1.2 | 0.2 |
| 4928 | 102f06 | AV394528 | CL25g04   |   |   | 106.3 | 99.8  | 81.0  | 1.0 | 0.1 | 1.2 | 0.2 |
| 4929 | 134h07 | AV619586 | LC010d06  |   |   | 11.2  | 13.5  | 10.8  | 1.3 | 0.8 | 1.2 | 0.4 |
| 4930 | 005f01 | AV387528 | CM026d12  |   |   | 78.5  | 65.5  | 54.9  | 0.8 | 0.4 | 1.2 | 0.8 |
| 4931 | 170c12 | BP097366 | MXL074e06 |   |   | 5.4   | 5.6   | 5.1   | 1.2 | 0.4 | 1.2 | 0.5 |
| 4932 | 102f07 | AV394546 | CL25g11   |   |   | 14.7  | 16.1  | 14.7  | 1.1 | 0.3 | 1.2 | 0.6 |
| 4933 | 004b08 | AV386646 | CM004a09  |   |   | 109.2 | 81.6  | 65.5  | 0.7 | 0.1 | 1.2 | 0.4 |
| 4934 | 119e09 | AV635151 | HC042e09  |   |   | 100.3 | 68.0  | 58.3  | 0.7 | 0.0 | 1.2 | 0.3 |
| 4935 | 115g06 | AV391470 | CM091a02  |   |   | 6.9   | 6.7   | 5.3   | 1.0 | 0.6 | 1.2 | 0.3 |
| 4936 | 145a04 | AV626460 | LCL009e03 |   |   | 6.6   | 5.3   | 4.3   | 0.8 | 0.1 | 1.2 | 0.2 |
| 4937 | 139e09 | AV623167 | LC059h03  |   |   | 54.7  | 50.0  | 50.0  | 0.9 | 0.3 | 1.2 | 0.8 |
| 4938 | 013h01 | AV639593 | HCL001e09 |   |   | 17.2  | 17.3  | 14.1  | 1.0 | 0.0 | 1.2 | 0.2 |
| 4939 | 026h10 | AV628693 | LCL045g02 |   |   | 1.7   | 1.7   | 1.5   | 1.0 | 0.3 | 1.2 | 0.6 |
| 4940 | 141e04 | AV624538 | LC079b05  |   |   | 12.7  | 13.4  | 11.1  | 1.1 | 0.1 | 1.2 | 0.1 |
| 4941 | 150c02 | AV628927 | LCL049b02 |   |   | 17.2  | 15.0  | 12.2  | 0.9 | 0.1 | 1.2 | 0.1 |
| 4942 | 122a04 | BP383715 | HC076h01  |   |   | 52.5  | 56.7  | 52.5  | 1.1 | 0.1 | 1.2 | 0.5 |
| 4943 | 141d06 | AV624447 | LC077h07  |   |   | 427.4 | 222.7 | 207.2 | 0.5 | 0.3 | 1.2 | 1.1 |
| 4944 | 160g03 | BP089238 | MX203e06  |   |   | 10.7  | 8.0   | 7.8   | 0.8 | 0.3 | 1.2 | 0.7 |
| 4945 | 018b10 | AV644272 | HCL085b08 |   |   | 2.6   | 3.2   | 2.9   | 1.2 | 0.4 | 1.2 | 0.6 |
| 4946 | 103c07 | AV394890 | CL34c06   |   |   | 3.7   | 3.5   | 2.9   | 1.0 | 0.2 | 1.2 | 0.4 |
| 4947 | 145b12 | AV626557 | LCL011c04 |   |   | 31.0  | 31.3  | 25.4  | 1.1 | 0.4 | 1.2 | 0.3 |
| 4948 | 172h05 | BP098560 | MXL095e04 |   |   | 10.6  | 10.0  | 12.5  | 0.8 | 0.4 | 1.2 | 1.3 |
| 4949 | 153b04 | AV630325 | LCL077c06 |   |   | 6.6   | 4.7   | 3.8   | 0.7 | 0.1 | 1.2 | 0.1 |
| 4950 | 103c08 | AV394897 | CL34d11   |   |   | 5.8   | 6.1   | 4.9   | 1.1 | 0.2 | 1.2 | 0.2 |
| 4951 | 012h03 | AV637542 | HC074d08  |   |   | 10.9  | 11.3  | 9.0   | 1.0 | 0.1 | 1.2 | 0.2 |
| 4952 | 016e12 | AV642334 | HCL049h11 |   |   | 4.6   | 4.4   | 5.1   | 0.9 | 0.4 | 1.2 | 1.1 |
| 4953 | 150e05 | AV629035 | LCL050g04 |   |   | 6.6   | 9.5   | 7.5   | 1.5 | 0.3 | 1.2 | 0.3 |
| 4954 | 116d08 | AV393253 | CM099b08  |   |   | 82.2  | 104.1 | 80.7  | 1.3 | 0.1 | 1.2 | 0.2 |
| 4955 | 135c01 | AV619859 | LC013g05  |   |   | 133.6 | 137.0 | 122.2 | 1.0 | 0.0 | 1.2 | 0.5 |
| 4956 | 150b02 | AV628850 | LCL048a05 |   |   | 6.8   | 6.9   | 5.7   | 1.0 | 0.1 | 1.2 | 0.3 |
| 4957 | 032f05 | BP093493 | MXL009b08 |   |   | 26.2  | 21.7  | 21.5  | 0.8 | 0.1 | 1.2 | 0.8 |
| 4958 | 159b02 | BP087737 | MX042f01  |   |   | 57.2  | 78.0  | 64.1  | 1.5 | 0.5 | 1.2 | 0.2 |
| 4959 | 022d03 | AV623769 | LC068d07  |   |   | 30.5  | 28.4  | 23.0  | 0.9 | 0.2 | 1.2 | 0.3 |
| 4960 | 102f01 | AV394458 | CL24g11   |   |   | 5.7   | 8.3   | 6.8   | 1.5 | 0.1 | 1.2 | 0.1 |
| 4961 | 014d12 | AV627409 | LCL026c11 |   |   | 7.7   | 7.0   | 6.5   | 0.9 | 0.2 | 1.2 | 0.8 |
| 4962 | 153h03 | AV630691 | LCL082g06 |   |   | 11.0  | 9.3   | 8.6   | 0.9 | 0.1 | 1.2 | 0.5 |
| 4963 | 019e08 | AV620023 | LC016d12  |   |   | 7.6   | 7.0   | 5.9   | 1.0 | 0.3 | 1.2 | 0.3 |
| 4964 | 130e02 | AV643493 | HCL070e12 |   |   | 9.2   | 9.8   | 8.5   | 1.1 | 0.2 | 1.2 | 0.5 |
| 4965 | 117c02 | AV632376 | HC007d09  |   |   | 3.6   | 4.8   | 3.8   | 1.5 | 0.7 | 1.2 | 0.3 |
| 4966 | 025a01 | AV626941 | LCL018e05 |   |   | 6.7   | 6.0   | 5.0   | 0.9 | 0.2 | 1.2 | 0.3 |
| 4967 | 132e05 | BP383761 | HCL092f09 |   |   | 143.5 | 101.5 | 81.7  | 0.7 | 0.1 | 1.2 | 0.1 |
| 4968 | 123a07 | AV639136 | HC095d09  |   |   | 178.9 | 200.2 | 159.3 | 1.1 | 0.2 | 1.2 | 0.1 |
| 4969 | 101a01 | AV393334 | CL01b09   |   |   | 1.8   | 3.7   | 3.2   | 3.2 | 2.1 | 1.2 | 0.6 |
| 4970 | 128a05 | AV642137 | HCL046c03 |   |   | 102.9 | 111.6 | 88.4  | 1.0 | 0.5 | 1.2 | 0.8 |
| 4971 | 109a10 | AV387808 | CM023e12  |   |   | 83.3  | 92.2  | 76.6  | 1.1 | 0.1 | 1.2 | 0.4 |
| 4972 | 141f07 | AV624656 | LC080g12  |   |   | 13.5  | 11.7  | 9.7   | 0.8 | 0.1 | 1.2 | 0.6 |
| 4973 | 145c05 | AV626575 | LCL011f10 |   |   | 25.0  | 29.8  | 24.3  | 1.2 | 0.1 | 1.2 | 0.1 |
| 4974 | 115e09 | AV391074 | CM089c06  |   |   | 773.2 | 656.9 | 539.0 | 0.9 | 0.1 | 1.2 | 0.4 |
| 4975 | 136h11 | AV621052 | LC030e04  |   |   | 4.9   | 5.1   | 4.1   | 1.1 | 0.3 | 1.2 | 0.2 |
| 4976 | 165d06 | BP095182 | MXL037d01 |   |   | 11.8  | 15.2  | 12.3  | 1.3 | 0.3 | 1.2 | 0.4 |
| 4977 | 146c01 | AV627029 | LCL020a12 |   |   | 20.1  | 18.5  | 16.3  | 0.9 | 0.2 | 1.2 | 0.7 |
| 4978 | 111g11 | AV391163 | CM051d02  |   |   | 18.6  | 23.1  | 18.9  | 1.3 | 0.1 | 1.2 | 0.2 |
| 4979 | 138d05 | AV622233 | LC046h07  |   |   | 3.6   | 4.8   | 3.9   | 1.4 | 0.2 | 1.2 | 0.1 |
| 4980 | 124b07 | AV640011 | HCL008g05 |   |   | 9.9   | 15.9  | 13.0  | 1.6 | 0.3 | 1.2 | 0.3 |
| 4981 | 153d11 | AV630486 | LCL079f05 |   |   | 10.9  | 13.1  | 10.7  | 1.2 | 0.2 | 1.2 | 0.2 |
| 4982 | 032g08 | BP093621 | MXL011a11 |   |   | 12.4  | 11.5  | 9.3   | 0.9 | 0.1 | 1.2 | 0.2 |
| 4983 | 036c01 | BP097921 | MXL083e11 |   |   | 29.4  | 23.7  | 34.2  | 0.8 | 0.1 | 1.2 | 1.0 |
| 4984 | 139e02 | AV623113 | LC059a12  |   |   | 7.9   | 7.8   | 6.3   | 1.1 | 0.4 | 1.2 | 0.3 |
| 4985 | 126b02 | BP383697 | HC031d06  |   |   | 64.7  | 67.8  | 62.0  | 1.1 | 0.0 | 1.2 | 0.5 |
| 4986 | 012c04 | AV636403 | HC059a08  |   |   | 21.6  | 22.2  | 18.3  | 1.1 | 0.3 | 1.2 | 0.3 |
| 4987 | 125a10 | AV640417 | HCL015h06 |   |   | 13.1  | 16.0  | 13.0  | 1.2 | 0.4 | 1.2 | 0.4 |
| 4988 | 106g09 | AV386613 | CM003c12  |   |   | 5.6   | 3.8   | 3.2   | 0.7 | 0.1 | 1.2 | 0.6 |
| 4989 | 132h01 | AV644839 | HCL094e04 |   |   | 7.8   | 8.2   | 7.0   | 1.1 | 0.2 | 1.2 | 0.5 |
| 4990 | 114h02 | AV390006 | CM081e09  |   |   | 8.4   | 9.1   | 8.3   | 1.1 | 0.2 | 1.2 | 0.4 |
| 4991 | 134a12 | AV618984 | LC002c01  |   |   | 8.6   | 9.8   | 8.1   | 1.1 | 0.1 | 1.2 | 0.3 |
| 4992 | 122b02 | AV637873 | HC078g02  |   |   | 10.4  | 11.3  | 9.2   | 1.1 | 0.2 | 1.2 | 0.4 |
| 4993 | 151g10 | AV629689 | LCL063g10 |   |   | 6.1   | 8.6   | 6.9   | 1.4 | 0.3 | 1.2 | 0.3 |
| 4994 | 103e12 | AV395219 | CL39a09   |   |   | 8.3   | 6.9   | 5.8   | 0.8 | 0.0 | 1.2 | 0.3 |
| 4995 | 166g06 | BP095748 | MXL046g12 |   |   | 6.6   | 5.3   | 4.4   | 0.8 | 0.1 | 1.2 | 0.3 |
| 4996 | 156f09 | BP086274 | MX005e10  |   |   | 8.4   | 12.7  | 10.1  | 1.5 | 0.4 | 1.2 | 0.2 |
| 4997 | 035b03 | BP096603 | MXL061f04 |   |   | 16.8  | 22.6  | 18.4  | 1.4 | 0.2 | 1.2 | 0.3 |
| 4998 | 018c03 | AV644315 | HCL086b09 |   |   | 6.4   | 6.1   | 5.0   | 1.0 | 0.1 | 1.2 | 0.2 |
| 4999 | 102a08 | AV394140 | CL17h12   |   |   | 1.2   | 2.0   | 1.5   | 1.6 | 0.9 | 1.2 | 0.5 |
| 5000 | 003f12 | AV397039 | CL72b11   |   |   | 7.0   | 4.1   | 5.6   | 0.6 | 0.1 | 1.2 | 1.0 |
| 5001 | 105c08 | AV396318 | CL61d02   |   |   | 4.9   | 4.8   | 4.1   | 1.0 | 0.1 | 1.2 | 0.3 |
| 5002 | 135a04 | AV619627 | LC011a01  |   |   | 11.5  | 14.8  | 12.5  | 1.3 | 0.1 | 1.2 | 0.3 |
| 5003 | 020a06 | AV620679 | LC025d05  |   |   | 25.4  | 14.5  | 11.9  | 0.6 | 0.1 | 1.2 | 0.6 |
| 5004 | 103h07 | AV395507 | CL42h07   |   |   | 7.4   | 7.3   | 6.0   | 1.1 | 0.3 | 1.2 | 0.2 |
| 5005 | 002h12 | AV395879 | CL52c04   |   |   | 8.4   | 7.5   | 9.4   | 0.8 | 0.5 | 1.2 | 1.2 |
| 5006 | 149e07 | AV628528 | LCL043c10 |   |   | 19.6  | 16.0  | 15.2  | 0.8 | 0.1 | 1.2 | 0.4 |
| 5007 | 152f01 | AV630033 | LCL071f07 |   |   | 19.0  | 16.1  | 14.0  | 0.9 | 0.2 | 1.2 | 0.3 |
| 5008 | 106g11 | AV386597 | CM003e09  |   |   | 7.7   | 9.4   | 7.6   | 1.2 | 0.2 | 1.2 | 0.1 |
| 5009 | 009d07 | AV391336 | CM090b12  |   |   | 7.1   | 9.1   | 7.4   | 1.3 | 0.4 | 1.2 | 0.1 |
| 5010 | 150e12 | AV629059 | LCL051a12 |   |   | 5.4   | 7.8   | 6.3   | 1.5 | 0.4 | 1.2 | 0.2 |
| 5011 | 123f05 | AV639666 | HCL002g01 |   |   | 23.6  | 30.7  | 24.7  | 1.3 | 0.3 | 1.2 | 0.1 |
| 5012 | 029b02 | AV630612 | LCL081e08 |   |   | 4.1   | 3.4   | 3.3   | 0.8 | 0.2 | 1.2 | 0.9 |
| 5013 | 032g04 | BP093598 | MXL010g01 |   |   | 14.2  | 13.4  | 11.8  | 0.9 | 0.1 | 1.2 | 0.5 |
| 5014 | 133e08 | AV645094 | HCL098b06 |   |   | 4.2   | 4.6   | 3.8   | 1.1 | 0.3 | 1.2 | 0.4 |
| 5015 | 024e01 | AV626595 | LCL012a09 |   |   | 13.0  | 13.0  | 11.5  | 1.0 | 0.2 | 1.2 | 0.5 |
| 5016 | 135d05 | AV619927 | LC015b07  |   |   | 12.8  | 10.3  | 9.2   | 0.8 | 0.1 | 1.2 | 0.6 |
| 5017 | 141a06 | AV624240 | LC074h10  |   |   | 10.9  | 7.7   | 6.2   | 0.8 | 0.2 | 1.2 | 0.0 |
| 5018 | 001e12 | AV394143 | CL17d02   |   |   | 3.2   | 5.2   | 4.3   | 1.5 | 0.8 | 1.2 | 0.9 |
| 5019 | 124a01 | AV639895 | HCL006g11 |   |   | 23.7  | 23.4  | 19.2  | 1.0 | 0.1 | 1.2 | 0.3 |
| 5020 | 029g01 | AV631038 | LCL087h11 |   |   | 22.9  | 23.6  | 21.8  | 1.1 | 0.4 | 1.2 | 0.6 |
| 5021 | 011c03 | AV634501 | HC034b12  |   |   | 8.2   | 9.0   | 7.2   | 1.1 | 0.2 | 1.2 | 0.2 |
| 5022 | 108e09 | AV397482 | CM020d08  |   |   | 35.0  | 35.7  | 28.9  | 1.1 | 0.3 | 1.2 | 0.2 |
| 5023 | 112f11 | AV392228 | CM059d07  |   |   | 87.5  | 80.5  | 65.2  | 0.9 | 0.1 | 1.2 | 0.1 |
| 5024 | 137h04 | BP098784 | MXL099b03 |   |   | 26.4  | 33.8  | 29.7  | 1.5 | 0.6 | 1.2 | 0.4 |
| 5025 | 135a05 | AV619636 | LC011b01  |   |   | 12.3  | 13.3  | 11.2  | 1.1 | 0.1 | 1.2 | 0.3 |
| 5026 | 029b09 | AV630652 | LCL082b08 |   |   |       |       |       |     |     |     |     |



|      | A      | B        | C         | D | E | F     | G     | H     | I   | J   | K   | L   |
|------|--------|----------|-----------|---|---|-------|-------|-------|-----|-----|-----|-----|
| 5027 | 123d02 | AV639506 | HC100c05  |   |   | 7.4   | 7.3   | 6.3   | 1.1 | 0.8 | 1.2 | 0.7 |
| 5028 | 025h08 | AV627916 | LCL033g12 |   |   | 18.6  | 11.0  | 9.4   | 0.6 | 0.1 | 1.2 | 0.5 |
| 5029 | 011h11 | AV635729 | HC050b09  |   |   | 8.8   | 5.0   | 4.0   | 0.6 | 0.1 | 1.2 | 0.2 |
| 5030 | 139d02 | AV623019 | LC057h04  |   |   | 10.4  | 9.6   | 8.3   | 1.0 | 0.2 | 1.2 | 0.3 |
| 5031 | 122h09 | AV639029 | HC094a11  |   |   | 7.1   | 6.9   | 5.7   | 1.0 | 0.2 | 1.2 | 0.2 |
| 5032 | 130g12 | AV643713 | HCL074f07 |   |   | 4.6   | 6.1   | 5.6   | 1.3 | 0.2 | 1.2 | 0.6 |
| 5033 | 135c08 | AV619826 | LC014c04  |   |   | 89.8  | 80.5  | 72.1  | 0.9 | 0.0 | 1.2 | 0.5 |
| 5034 | 016e11 | AV642321 | HCL049f12 |   |   | 3.1   | 5.6   | 4.7   | 1.9 | 0.6 | 1.2 | 0.7 |
| 5035 | 015d12 | AV641107 | HCL027h05 |   |   | 6.0   | 5.7   | 5.8   | 1.0 | 0.5 | 1.2 | 1.0 |
| 5036 | 011e01 | AV634919 | HC039f09  |   |   | 7.9   | 10.3  | 8.4   | 1.4 | 0.6 | 1.2 | 0.2 |
| 5037 | 129d04 | BP383734 | HCL058f01 |   |   | 46.9  | 37.9  | 30.8  | 0.8 | 0.2 | 1.2 | 0.2 |
| 5038 | 101f09 | AV393825 | CL12h11   |   |   | 9.5   | 12.5  | 10.2  | 1.4 | 0.3 | 1.2 | 0.2 |
| 5039 | 122c04 | AV637996 | HC080d07  |   |   | 9.7   | 11.2  | 9.5   | 1.2 | 0.3 | 1.2 | 0.5 |
| 5040 | 111d05 | AV390513 | CM046g06  |   |   | 15.5  | 17.2  | 14.0  | 1.1 | 0.1 | 1.2 | 0.1 |
| 5041 | 139a12 | BP383801 | LC055b06  |   |   | 72.2  | 53.4  | 42.3  | 0.7 | 0.2 | 1.2 | 0.4 |
| 5042 | 028a08 | AV629578 | LCL061c10 |   |   | 10.4  | 10.4  | 8.6   | 1.0 | 0.3 | 1.2 | 0.5 |
| 5043 | 137b06 | AV621227 | LC033a05  |   |   | 71.5  | 43.9  | 38.4  | 0.6 | 0.3 | 1.2 | 0.9 |
| 5044 | 149d04 | AV628472 | LCL042d08 |   |   | 5.3   | 8.8   | 7.0   | 1.6 | 0.2 | 1.2 | 0.2 |
| 5045 | 149h04 | AV628709 | LCL046a04 |   |   | 148.5 | 177.5 | 142.2 | 1.5 | 1.0 | 1.2 | 0.5 |
| 5046 | 113f10 | AV387739 | CM069f09  |   |   | 13.9  | 9.6   | 8.0   | 0.7 | 0.1 | 1.2 | 0.3 |
| 5047 | 011f04 | AV635198 | HC043c01  |   |   | 8.6   | 6.2   | 5.1   | 0.7 | 0.1 | 1.2 | 0.2 |
| 5048 | 121d06 | AV637106 | HC068g11  |   |   | 42.3  | 29.2  | 25.2  | 0.7 | 0.1 | 1.2 | 0.6 |
| 5049 | 116b04 | AV392336 | CM096e06  |   |   | 8.8   | 5.8   | 4.8   | 0.7 | 0.3 | 1.2 | 0.2 |
| 5050 | 144a12 | AV626130 | LCL002h01 |   |   | 24.5  | 20.1  | 17.5  | 0.8 | 0.1 | 1.2 | 0.4 |
| 5051 | 017g04 | AV643625 | HCL073a05 |   |   | 15.6  | 20.6  | 16.8  | 1.4 | 0.4 | 1.2 | 0.2 |
| 5052 | 009e04 | AV391643 | CM092e12  |   |   | 9.8   | 14.0  | 11.9  | 1.4 | 0.6 | 1.2 | 0.6 |
| 5053 | 132a04 | AV644404 | HCL087h11 |   |   | 15.8  | 22.8  | 19.1  | 1.4 | 0.4 | 1.2 | 0.4 |
| 5054 | 138e05 | AV622320 | LC048b02  |   |   | 4.5   | 4.8   | 4.2   | 1.2 | 0.4 | 1.2 | 0.4 |
| 5055 | 172e12 | BP098441 | MXL093d01 |   |   | 3.9   | 10.5  | 8.6   | 2.9 | 1.1 | 1.2 | 0.2 |
| 5056 | 112b12 | AV391568 | CM055c04  |   |   | 5.9   | 6.1   | 5.2   | 1.1 | 0.3 | 1.2 | 0.6 |
| 5057 | 124d10 | AV640143 | HCL011b08 |   |   | 16.8  | 17.0  | 14.4  | 1.0 | 0.2 | 1.2 | 0.4 |
| 5058 | 027g06 | AV629422 | LCL058e03 |   |   | 7.6   | 6.3   | 5.4   | 0.8 | 0.1 | 1.2 | 0.3 |
| 5059 | 168e03 | BP096538 | MXL060d06 |   |   | 3.1   | 3.8   | 3.6   | 1.2 | 0.4 | 1.2 | 0.7 |
| 5060 | 119h11 | AV635624 | HC048f11  |   |   | 6.5   | 7.7   | 6.3   | 1.3 | 0.7 | 1.2 | 0.5 |
| 5061 | 146a10 | AV626982 | LCL019c11 |   |   | 13.3  | 13.9  | 11.4  | 1.0 | 0.2 | 1.2 | 0.3 |
| 5062 | 109h04 | AV388622 | CM030f02  |   |   | 81.6  | 97.3  | 79.0  | 1.2 | 0.2 | 1.2 | 0.1 |
| 5063 | 002a07 | AV394644 | CL29b12   |   |   | 9.3   | 9.1   | 10.1  | 1.2 | 0.5 | 1.2 | 0.7 |
| 5064 | 106e12 | BP383671 | CM001g01  |   |   | 71.3  | 71.6  | 58.2  | 1.0 | 0.1 | 1.2 | 0.2 |
| 5065 | 149f09 | AV628588 | LCL044b10 |   |   | 8.7   | 9.6   | 7.9   | 1.1 | 0.2 | 1.2 | 0.1 |
| 5066 | 101b07 | AV397603 | CL02c10   |   |   | 53.7  | 48.6  | 44.0  | 0.9 | 0.0 | 1.2 | 0.5 |
| 5067 | 008e03 | AV397373 | CM070e08  |   |   | 25.5  | 27.7  | 22.5  | 1.1 | 0.2 | 1.2 | 0.0 |
| 5068 | 135h03 | AV620300 | LC020c06  |   |   | 13.9  | 17.1  | 16.2  | 1.3 | 0.1 | 1.2 | 0.7 |
| 5069 | 157f11 | BP087123 | MX026a01  |   |   | 7.4   | 7.9   | 7.4   | 1.1 | 0.5 | 1.2 | 0.7 |
| 5070 | 135h06 | AV620326 | LC020f01  |   |   | 5.4   | 5.9   | 4.8   | 1.2 | 0.5 | 1.2 | 0.1 |
| 5071 | 033f02 | BP094611 | MXL025f05 |   |   | 7.3   | 6.2   | 5.5   | 1.0 | 0.6 | 1.2 | 0.4 |
| 5072 | 133f03 | AV645121 | HCL098e04 |   |   | 166.1 | 230.3 | 179.0 | 1.3 | 0.4 | 1.2 | 0.4 |
| 5073 | 104c07 | AV395704 | CL47f08   |   |   | 15.1  | 15.4  | 12.5  | 1.1 | 0.2 | 1.2 | 0.1 |
| 5074 | 133g09 | AV645217 | HCL099g05 |   |   | 19.3  | 25.7  | 21.1  | 1.3 | 0.1 | 1.2 | 0.2 |
| 5075 | 141a04 | BP383813 | LC074c06  |   |   | 134.6 | 86.6  | 78.1  | 0.6 | 0.2 | 1.2 | 0.7 |
| 5076 | 104e09 | AV395915 | CL51b09   |   |   | 14.8  | 15.4  | 12.4  | 1.0 | 0.2 | 1.2 | 0.3 |
| 5077 | 114c11 | AV389448 | CM075f10  |   |   | 4.6   | 5.0   | 4.2   | 1.1 | 0.2 | 1.2 | 0.3 |
| 5078 | 140d02 | AV623778 | LC068e05  |   |   | 56.0  | 40.9  | 35.8  | 0.7 | 0.1 | 1.2 | 0.5 |
| 5079 | 007f04 | AV392068 | CM058b08  |   |   | 66.8  | 46.5  | 43.5  | 0.7 | 0.4 | 1.2 | 1.0 |
| 5080 | 112c04 | AV391639 | CM055e09  |   |   | 8.8   | 10.3  | 8.4   | 1.2 | 0.1 | 1.2 | 0.1 |
| 5081 | 014g05 | AV640403 | HCL015f08 |   |   | 8.3   | 8.0   | 6.5   | 1.0 | 0.0 | 1.2 | 0.2 |
| 5082 | 036h01 | BP098767 | MXL098g07 |   |   | 23.1  | 28.9  | 23.9  | 1.3 | 0.3 | 1.2 | 0.2 |
| 5083 | 137g12 | AV621908 | LC042e01  |   |   | 8.2   | 8.1   | 6.8   | 1.1 | 0.2 | 1.2 | 0.5 |
| 5084 | 127f02 | AV641919 | HCL042d10 |   |   | 14.5  | 16.2  | 13.2  | 1.1 | 0.1 | 1.2 | 0.1 |
| 5085 | 139e01 | AV623106 | LC059a05  |   |   | 10.4  | 8.5   | 7.9   | 1.0 | 0.5 | 1.2 | 0.5 |
| 5086 | 154a09 | AV630778 | LCL084b08 |   |   | 9.6   | 9.4   | 7.7   | 1.0 | 0.4 | 1.2 | 0.4 |
| 5087 | 121a05 | AV636618 | HC061h06  |   |   | 172.9 | 165.0 | 132.7 | 0.9 | 0.1 | 1.2 | 0.1 |
| 5088 | 132f09 | AV644792 | HCL093h03 |   |   | 10.7  | 11.3  | 9.6   | 1.0 | 0.1 | 1.2 | 0.5 |
| 5089 | 153d08 | AV630477 | LCL079d12 |   |   | 86.0  | 66.3  | 54.7  | 0.8 | 0.2 | 1.2 | 0.3 |
| 5090 | 131f04 | AV644224 | HCL084c09 |   |   | 8.2   | 9.3   | 7.6   | 1.2 | 0.1 | 1.2 | 0.2 |
| 5091 | 140b01 | AV623600 | LC066b02  |   |   | 13.3  | 9.3   | 7.6   | 0.7 | 0.2 | 1.2 | 0.3 |
| 5092 | 104a03 | AV395526 | CL43e06   |   |   | 8.3   | 11.4  | 9.6   | 1.5 | 0.4 | 1.2 | 0.4 |
| 5093 | 139d03 | AV623028 | LC058a01  |   |   | 6.9   | 6.7   | 5.7   | 1.0 | 0.2 | 1.2 | 0.3 |
| 5094 | 130a05 | AV643184 | HCL065c01 |   |   | 13.2  | 15.6  | 12.8  | 1.2 | 0.2 | 1.2 | 0.2 |
| 5095 | 111a05 | AV390092 | CM042b09  |   |   | 5.3   | 7.1   | 5.8   | 1.4 | 0.1 | 1.2 | 0.0 |
| 5096 | 144b05 | AV626154 | LCL003c05 |   |   | 6.6   | 6.9   | 6.0   | 1.1 | 0.3 | 1.2 | 0.5 |
| 5097 | 123f09 | AV639713 | HCL003e09 |   |   | 67.3  | 62.7  | 51.4  | 1.0 | 0.3 | 1.2 | 0.1 |
| 5098 | 115d04 | AV391001 | CM086h10  |   |   | 33.6  | 41.2  | 34.0  | 1.2 | 0.1 | 1.2 | 0.2 |
| 5099 | 021d12 | AV622387 | LC049a06  |   |   | 12.8  | 36.8  | 30.2  | 2.9 | 0.3 | 1.2 | 0.0 |
| 5100 | 142c10 | AV625066 | LC087d06  |   |   | 14.8  | 7.7   | 6.7   | 0.5 | 0.1 | 1.2 | 0.6 |
| 5101 | 103a07 | AV395036 | CL31b01   |   |   | 64.7  | 61.3  | 52.2  | 1.1 | 0.4 | 1.2 | 0.2 |
| 5102 | 131h09 | AV644378 | HCL087d07 |   |   | 11.1  | 11.3  | 9.8   | 1.1 | 0.2 | 1.2 | 0.5 |
| 5103 | 149b07 | AV628366 | LCL040f06 |   |   | 9.0   | 9.2   | 7.5   | 1.0 | 0.2 | 1.2 | 0.2 |
| 5104 | 102f12 | AV394593 | CL26g11   |   |   | 7.2   | 6.3   | 5.1   | 0.9 | 0.2 | 1.2 | 0.3 |
| 5105 | 131g09 | AV644307 | HCL086a04 |   |   | 13.9  | 9.7   | 8.2   | 0.7 | 0.3 | 1.2 | 0.5 |
| 5106 | 027a06 | AV628755 | LCL046f05 |   |   | 9.8   | 16.0  | 13.4  | 1.6 | 0.1 | 1.2 | 0.2 |
| 5107 | 103g11 | AV395452 | CL42c06   |   |   | 11.0  | 11.9  | 10.2  | 1.1 | 0.2 | 1.2 | 0.3 |
| 5108 | 151d12 | AV629508 | LCL060a07 |   |   | 12.8  | 11.7  | 9.7   | 0.9 | 0.1 | 1.2 | 0.4 |
| 5109 | 012f07 | AV637155 | HC069e06  |   |   | 30.3  | 37.9  | 31.0  | 1.3 | 0.4 | 1.2 | 0.1 |
| 5110 | 155d02 | AV631391 | LCL093b05 |   |   | 6.8   | 7.5   | 6.1   | 1.2 | 0.3 | 1.2 | 0.1 |
| 5111 | 009g05 | AV397525 | CM098e01  |   |   | 7.8   | 10.4  | 8.6   | 1.4 | 0.3 | 1.2 | 0.2 |
| 5112 | 122b01 | AV637851 | HC078e01  |   |   | 42.8  | 47.8  | 41.3  | 1.2 | 0.3 | 1.2 | 0.4 |
| 5113 | 035c02 | BP096809 | MXL065c02 |   |   | 18.1  | 12.5  | 10.8  | 0.7 | 0.2 | 1.2 | 0.3 |
| 5114 | 113e05 | AV393212 | CM068d04  |   |   | 66.1  | 45.7  | 37.5  | 0.7 | 0.1 | 1.2 | 0.1 |
| 5115 | 111b11 | AV390309 | CM045b04  |   |   | 5.7   | 5.2   | 4.4   | 0.9 | 0.0 | 1.2 | 0.4 |
| 5116 | 102g08 | AV394729 | CL27g03   |   |   | 4.2   | 3.7   | 3.2   | 0.9 | 0.1 | 1.2 | 0.4 |
| 5117 | 104b09 | AV397794 | CL45d08   |   |   | 4.4   | 4.6   | 4.3   | 1.1 | 0.3 | 1.2 | 0.7 |
| 5118 | 138g04 | AV622557 | LC051c01  |   |   | 267.5 | 258.5 | 218.0 | 1.0 | 0.1 | 1.2 | 0.2 |
| 5119 | 104a09 | AV395594 | CL44a11   |   |   | 12.9  | 15.0  | 12.2  | 1.1 | 0.1 | 1.2 | 0.2 |
| 5120 | 105b08 | AV396232 | CL58f09   |   |   | 3.4   | 3.7   | 3.3   | 1.1 | 0.3 | 1.2 | 0.4 |
| 5121 | 110e12 | AV389504 | CM037b08  |   |   | 20.1  | 18.7  | 15.4  | 0.9 | 0.2 | 1.2 | 0.3 |
| 5122 | 111b09 | AV390255 | CM044d04  |   |   | 6.4   | 9.3   | 8.7   | 1.4 | 0.4 | 1.2 | 0.8 |
| 5123 | 022a08 | AV623352 | LC062e05  |   |   | 9.4   | 10.8  | 9.0   | 1.2 | 0.2 | 1.2 | 0.1 |
| 5124 | 152e04 | AV630005 | LCL070g12 |   |   | 15.1  | 16.7  | 14.5  | 1.1 | 0.1 | 1.2 | 0.3 |
| 5125 | 013e04 | AV638804 | HC091a06  |   |   | 55.5  | 60.8  | 50.7  | 1.1 | 0.2 | 1.2 | 0.3 |
| 5126 | 112c08 | AV391675 | CM055f11  |   |   | 7.1   | 12.1  | 10.5  | 1.7 | 0.1 | 1.2 | 0.4 |
| 5127 | 107a07 | AV387203 | CM006e12  |   |   | 11.0  | 16.6  | 13.9  | 1.5 | 0.1 | 1.2 | 0.1 |
| 5128 | 035h01 | BP097432 | MXL075f03 |   |   | 3.7   | 5.2   | 4.4   | 1.4 | 0.3 | 1.2 | 0.3 |
| 5129 | 135h09 | AV620356 | LC021a03  |   |   | 32.0  | 33.7  | 28.4  | 1.1 | 0.1 | 1.2 | 0.2 |
| 5130 | 123g12 | AV639807 | HCL005c10 |   |   | 16.0  | 18.2  | 14.8  | 1.1 | 0.2 | 1.2 | 0.2 |
| 5131 | 144c06 | AV626205 | LCL004c02 |   |   | 15.8  | 16.8  | 14.3  | 1.1 | 0.2 | 1.2 | 0.2 |
| 5132 | 140g10 | AV624090 | LC072g11  |   |   | 22.1  | 17.5  | 15.8  | 0.8 | 0.2 | 1.2 | 0.8 |
| 5133 | 125a12 | AV640432 | HCL016b10 |   |   | 17.   |       |       |     |     |     |     |

|      | A      | B        | C         | D | E | F     | G     | H     | I   | J   | K   | L   |
|------|--------|----------|-----------|---|---|-------|-------|-------|-----|-----|-----|-----|
| 5134 | 005a08 | AV387240 | CM018c05  |   |   | 19.7  | 21.0  | 17.4  | 1.1 | 0.3 | 1.2 | 0.1 |
| 5135 | 106d06 | AV397180 | CL79g09   |   |   | 6.8   | 8.7   | 7.2   | 1.3 | 0.6 | 1.2 | 0.4 |
| 5136 | 029f09 | AV630985 | LCL087c05 |   |   | 20.5  | 23.6  | 19.8  | 1.1 | 0.1 | 1.2 | 0.1 |
| 5137 | 106c04 | AV397142 | CL78h08   |   |   | 12.4  | 6.8   | 5.7   | 0.7 | 0.3 | 1.2 | 0.3 |
| 5138 | 128a06 | AV642138 | HCL046c04 |   |   | 6.9   | 6.4   | 5.4   | 0.9 | 0.0 | 1.2 | 0.3 |
| 5139 | 014a05 | AV639688 | HCL003b04 |   |   | 64.3  | 59.4  | 52.8  | 0.9 | 0.2 | 1.2 | 0.4 |
| 5140 | 138a04 | AV622029 | LC044b05  |   |   | 26.4  | 21.0  | 18.0  | 0.8 | 0.1 | 1.2 | 0.3 |
| 5141 | 033c06 | BP094226 | MXL019g11 |   |   | 10.2  | 8.8   | 7.4   | 0.9 | 0.1 | 1.2 | 0.2 |
| 5142 | 035g07 | BP097397 | MXL075a10 |   |   | 14.7  | 12.8  | 11.7  | 0.9 | 0.1 | 1.2 | 0.5 |
| 5143 | 133h05 | AV645258 | HCL100c10 |   |   | 11.6  | 13.1  | 11.1  | 1.1 | 0.1 | 1.2 | 0.2 |
| 5144 | 115b01 | AV390384 | CM084a11  |   |   | 134.7 | 223.2 | 184.0 | 1.7 | 0.2 | 1.2 | 0.1 |
| 5145 | 125g01 | AV640767 | HCL022a09 |   |   | 8.8   | 10.1  | 8.3   | 1.2 | 0.3 | 1.2 | 0.1 |
| 5146 | 121c09 | AV637009 | HC067d05  |   |   | 154.4 | 145.8 | 143.1 | 0.9 | 0.1 | 1.2 | 0.6 |
| 5147 | 101d04 | AV393619 | CL06c12   |   |   | 4.0   | 4.6   | 3.8   | 1.2 | 0.3 | 1.2 | 0.0 |
| 5148 | 111g01 | AV391062 | CM050e05  |   |   | 5.1   | 5.9   | 5.0   | 1.2 | 0.2 | 1.2 | 0.3 |
| 5149 | 121e05 | AV637198 | HC070a09  |   |   | 5.3   | 6.5   | 5.3   | 1.2 | 0.2 | 1.2 | 0.3 |
| 5150 | 138b01 | AV622089 | LC044h03  |   |   | 10.4  | 10.3  | 8.8   | 1.0 | 0.4 | 1.2 | 0.5 |
| 5151 | 133b11 | AV644987 | HCL096e11 |   |   | 157.6 | 165.2 | 140.3 | 1.0 | 0.0 | 1.2 | 0.2 |
| 5152 | 008f05 | AV388854 | CM073b07  |   |   | 72.7  | 74.5  | 67.3  | 1.0 | 0.2 | 1.2 | 0.7 |
| 5153 | 109e05 | AV387634 | CM027c11  |   |   | 12.4  | 10.7  | 8.7   | 0.8 | 0.2 | 1.2 | 0.4 |
| 5154 | 003a05 | AV395990 | CL53a11   |   |   | 69.1  | 49.1  | 41.0  | 0.8 | 0.2 | 1.2 | 0.2 |
| 5155 | 150a02 | AV628771 | LCL046g11 |   |   | 12.2  | 9.9   | 8.4   | 0.8 | 0.1 | 1.2 | 0.3 |
| 5156 | 013f01 | AV638967 | HC093c01  |   |   | 50.0  | 56.6  | 47.1  | 1.2 | 0.3 | 1.2 | 0.2 |
| 5157 | 005c08 | AV387823 | CM022a06  |   |   | 9.7   | 9.9   | 8.3   | 1.0 | 0.1 | 1.2 | 0.2 |
| 5158 | 004c12 | AV387206 | CM006h11  |   |   | 7.6   | 5.8   | 4.8   | 0.8 | 0.2 | 1.2 | 0.3 |
| 5159 | 136h10 | AV621025 | LC030b03  |   |   | 6.8   | 7.4   | 6.3   | 1.2 | 0.3 | 1.2 | 0.5 |
| 5160 | 152a11 | AV629795 | LCL066c11 |   |   | 13.8  | 14.6  | 14.3  | 1.1 | 0.3 | 1.2 | 0.7 |
| 5161 | 101e07 | AV393692 | CL10f08   |   |   | 5.2   | 4.5   | 4.3   | 0.9 | 0.2 | 1.2 | 0.6 |
| 5162 | 020h08 | AV621667 | LC039d03  |   |   | 25.0  | 17.5  | 14.5  | 0.7 | 0.1 | 1.2 | 0.1 |
| 5163 | 130c03 | AV643314 | HCL067d10 |   |   | 14.0  | 15.6  | 13.0  | 1.1 | 0.1 | 1.2 | 0.4 |
| 5164 | 029b05 | AV630622 | LCL081f11 |   |   | 10.8  | 9.2   | 7.7   | 0.9 | 0.3 | 1.2 | 0.1 |
| 5165 | 134h05 | AV619582 | LC010c12  |   |   | 7.0   | 6.8   | 5.6   | 1.0 | 0.4 | 1.2 | 0.2 |
| 5166 | 019a11 | AV619494 | LC009a11  |   |   | 15.6  | 10.9  | 8.9   | 0.9 | 0.5 | 1.2 | 0.1 |
| 5167 | 111c03 | AV390337 | CM045b10  |   |   | 17.1  | 12.6  | 10.6  | 0.8 | 0.2 | 1.2 | 0.1 |
| 5168 | 151g04 | AV629640 | LCL062e04 |   |   | 17.4  | 21.0  | 17.6  | 1.2 | 0.2 | 1.2 | 0.3 |
| 5169 | 004a08 | AV397813 | CM002e10  |   |   | 85.6  | 93.9  | 79.3  | 1.1 | 0.3 | 1.2 | 0.3 |
| 5170 | 114a02 | AV388694 | CM072a05  |   |   | 5.9   | 7.6   | 6.3   | 1.4 | 0.6 | 1.2 | 0.1 |
| 5171 | 031h01 | BP087393 | MX033f03  |   |   | 5.4   | 6.8   | 5.6   | 1.3 | 0.4 | 1.2 | 0.2 |
| 5172 | 131b02 | AV643871 | HCL077e03 |   |   | 136.7 | 101.0 | 84.2  | 0.7 | 0.2 | 1.2 | 0.2 |
| 5173 | 027d05 | AV629167 | LCL053e06 |   |   | 2.4   | 2.5   | 2.2   | 1.1 | 0.4 | 1.2 | 0.4 |
| 5174 | 144d02 | AV626236 | LCL004h04 |   |   | 13.1  | 11.5  | 9.6   | 0.9 | 0.2 | 1.2 | 0.2 |
| 5175 | 146a09 | AV626979 | LCL019c05 |   |   | 6.9   | 5.2   | 4.4   | 0.8 | 0.2 | 1.2 | 0.3 |
| 5176 | 021a10 | AV621940 | LC042h06  |   |   | 46.2  | 55.1  | 45.9  | 1.2 | 0.2 | 1.2 | 0.5 |
| 5177 | 105e02 | AV396545 | CL63h01   |   |   | 6.2   | 7.7   | 6.4   | 1.3 | 0.1 | 1.2 | 0.1 |
| 5178 | 111h08 | AV391246 | CM052c01  |   |   | 5.1   | 5.2   | 4.4   | 1.1 | 0.5 | 1.2 | 0.4 |
| 5179 | 122c05 | AV638018 | HC080f12  |   |   | 14.8  | 18.8  | 15.5  | 1.4 | 0.6 | 1.2 | 0.1 |
| 5180 | 147d04 | AV627516 | LCL027h08 |   |   | 9.0   | 14.3  | 12.3  | 1.7 | 0.6 | 1.2 | 0.2 |
| 5181 | 114e02 | AV388038 | CM077d11  |   |   | 8.6   | 8.1   | 6.9   | 1.0 | 0.2 | 1.2 | 0.2 |
| 5182 | 114f08 | AV389646 | CM079b08  |   |   | 5.2   | 7.2   | 6.0   | 1.4 | 0.5 | 1.2 | 0.3 |
| 5183 | 108h12 | AV387840 | CM022h12  |   |   | 4.8   | 5.4   | 4.5   | 1.1 | 0.5 | 1.2 | 0.6 |
| 5184 | 022a02 | AV623253 | LC061b03  |   |   | 14.6  | 16.4  | 13.5  | 1.1 | 0.2 | 1.2 | 0.1 |
| 5185 | 138d09 | AV622266 | LC047d02  |   |   | 16.8  | 15.6  | 12.8  | 0.9 | 0.1 | 1.2 | 0.1 |
| 5186 | 001h06 | AV394600 | CL26e01   |   |   | 93.6  | 84.2  | 70.7  | 0.9 | 0.2 | 1.2 | 0.3 |
| 5187 | 017e06 | AV643318 | HCL067e02 |   |   | 2.1   | 2.0   | 1.7   | 1.1 | 0.6 | 1.2 | 0.4 |
| 5188 | 112f09 | AV392188 | CM058h07  |   |   | 11.8  | 9.2   | 7.8   | 0.8 | 0.0 | 1.2 | 0.6 |
| 5189 | 136d09 | AV620701 | LC025f10  |   |   | 12.5  | 11.9  | 9.8   | 1.0 | 0.4 | 1.2 | 0.3 |
| 5190 | 028c12 | AV629854 | LCL067f12 |   |   | 18.4  | 35.2  | 29.2  | 1.9 | 0.1 | 1.2 | 0.1 |
| 5191 | 127d07 | AV641794 | HCL040d03 |   |   | 9.6   | 10.3  | 8.8   | 1.0 | 0.3 | 1.2 | 0.4 |
| 5192 | 104f09 | AV395866 | CL52d01   |   |   | 103.4 | 124.7 | 102.6 | 1.2 | 0.2 | 1.2 | 0.5 |
| 5193 | 133h02 | AV645239 | HCL100a12 |   |   | 14.2  | 16.4  | 14.1  | 1.2 | 0.4 | 1.2 | 0.4 |
| 5194 | 104f10 | AV395857 | CL52f06   |   |   | 9.4   | 8.7   | 7.3   | 1.0 | 0.3 | 1.2 | 0.2 |
| 5195 | 104g05 | AV395994 | CL53f11   |   |   | 4.4   | 5.0   | 4.2   | 1.2 | 0.4 | 1.2 | 0.1 |
| 5196 | 117b12 | AV632373 | HC007d05  |   |   | 4.2   | 4.6   | 3.8   | 1.1 | 0.1 | 1.2 | 0.2 |
| 5197 | 153g12 | AV630669 | LCL082d12 |   |   | 11.8  | 16.3  | 12.9  | 1.4 | 0.7 | 1.2 | 0.4 |
| 5198 | 014f06 | AV640260 | HCL013c11 |   |   | 302.2 | 295.7 | 246.2 | 1.0 | 0.1 | 1.2 | 0.1 |
| 5199 | 119c02 | AV634764 | HC037f01  |   |   | 3.7   | 3.8   | 3.2   | 1.0 | 0.3 | 1.2 | 0.1 |
| 5200 | 029h09 | AV631213 | LCL090d02 |   |   | 18.3  | 19.0  | 16.8  | 1.0 | 0.1 | 1.2 | 0.4 |
| 5201 | 108b12 | AV388197 | CM017c07  |   |   | 54.3  | 60.5  | 50.7  | 1.1 | 0.1 | 1.2 | 0.2 |
| 5202 | 137h11 | AV621984 | LC043e10  |   |   | 12.5  | 13.5  | 11.4  | 1.1 | 0.3 | 1.2 | 0.4 |
| 5203 | 132b06 | BP383758 | HCL089g04 |   |   | 10.7  | 9.5   | 9.0   | 0.9 | 0.3 | 1.2 | 0.5 |
| 5204 | 123g07 | AV639783 | HCL005a02 |   |   | 6.8   | 9.6   | 7.9   | 1.4 | 0.5 | 1.2 | 0.1 |
| 5205 | 141h12 | AV624818 | LC083b10  |   |   | 10.6  | 11.6  | 9.8   | 1.1 | 0.1 | 1.2 | 0.2 |
| 5206 | 124g06 | AV640264 | HCL013d05 |   |   | 6.0   | 6.0   | 5.2   | 1.0 | 0.2 | 1.2 | 0.4 |
| 5207 | 117f04 | AV632893 | HC014a07  |   |   | 5.4   | 4.6   | 3.9   | 0.9 | 0.2 | 1.2 | 0.2 |
| 5208 | 123d06 | AV639549 | HC100g12  |   |   | 9.0   | 8.2   | 7.0   | 0.9 | 0.1 | 1.2 | 0.3 |
| 5209 | 122b10 | AV637936 | HC079f03  |   |   | 13.7  | 15.8  | 14.8  | 1.2 | 0.2 | 1.2 | 0.5 |
| 5210 | 142c01 | AV625008 | LC085f12  |   |   | 8.5   | 8.6   | 7.4   | 1.1 | 0.2 | 1.2 | 0.2 |
| 5211 | 123h03 | BP098686 | MXL097d04 |   |   | 4.6   | 5.0   | 4.2   | 1.1 | 0.2 | 1.2 | 0.2 |
| 5212 | 104h06 | AV396064 | CL55c01   |   |   | 6.9   | 5.8   | 4.7   | 0.8 | 0.2 | 1.2 | 0.5 |
| 5213 | 135b12 | AV619866 | LC013g03  |   |   | 70.2  | 89.6  | 74.9  | 1.3 | 0.1 | 1.2 | 0.1 |
| 5214 | 027g05 | AV629408 | LCL058c03 |   |   | 8.5   | 8.7   | 7.4   | 1.0 | 0.1 | 1.2 | 0.4 |
| 5215 | 025c04 | AV627213 | LCL022g08 |   |   | 18.4  | 14.6  | 12.5  | 0.8 | 0.1 | 1.2 | 0.3 |
| 5216 | 117b03 | AV632237 | HC005f06  |   |   | 6.0   | 9.6   | 8.2   | 1.7 | 0.4 | 1.2 | 0.3 |
| 5217 | 030a10 | AV631354 | LCL092e06 |   |   | 14.4  | 15.0  | 12.4  | 1.0 | 0.2 | 1.2 | 0.2 |
| 5218 | 005h04 | AV388592 | CM030e02  |   |   | 69.8  | 78.4  | 67.2  | 1.1 | 0.3 | 1.2 | 0.3 |
| 5219 | 109b04 | AV387753 | CM023h06  |   |   | 19.2  | 18.2  | 14.9  | 0.9 | 0.2 | 1.2 | 0.1 |
| 5220 | 013d03 | AV638600 | HC088d07  |   |   | 3.8   | 5.5   | 4.5   | 1.4 | 0.2 | 1.2 | 0.3 |
| 5221 | 137g04 | AV621849 | LC041g01  |   |   | 26.5  | 24.7  | 24.4  | 0.9 | 0.1 | 1.2 | 0.6 |
| 5222 | 151b01 | AV629334 | LCL056g08 |   |   | 15.3  | 11.5  | 9.6   | 0.8 | 0.2 | 1.2 | 0.2 |
| 5223 | 109h08 | AV388661 | CM031b11  |   |   | 9.6   | 9.3   | 7.6   | 1.0 | 0.1 | 1.2 | 0.1 |
| 5224 | 157g03 | BP087137 | MX026d06  |   |   | 11.7  | 11.7  | 10.1  | 1.1 | 0.2 | 1.2 | 0.2 |
| 5225 | 131g07 | BP383756 | HCL085g12 |   |   | 5.0   | 5.2   | 4.5   | 1.1 | 0.2 | 1.2 | 0.3 |
| 5226 | 109f01 | AV387723 | CM027h03  |   |   | 15.8  | 12.7  | 11.0  | 0.8 | 0.1 | 1.2 | 0.5 |
| 5227 | 109a02 | AV387770 | CM023a06  |   |   | 6.0   | 6.6   | 5.8   | 1.4 | 0.6 | 1.2 | 0.6 |
| 5228 | 013a05 | AV637791 | HC077e08  |   |   | 163.5 | 212.5 | 178.5 | 1.3 | 0.1 | 1.2 | 0.2 |
| 5229 | 108c05 | AV388171 | CM017f01  |   |   | 164.6 | 156.8 | 132.8 | 1.1 | 0.5 | 1.2 | 0.4 |
| 5230 | 136d07 | AV620680 | LC025d07  |   |   | 7.8   | 7.0   | 6.2   | 0.9 | 0.1 | 1.2 | 0.3 |
| 5231 | 128f01 | BP383729 | HCL051h08 |   |   | 16.8  | 23.5  | 19.8  | 1.4 | 0.2 | 1.2 | 0.2 |
| 5232 | 118a09 | AV633390 | HC020c07  |   |   | 45.0  | 57.5  | 49.6  | 1.3 | 0.2 | 1.2 | 0.3 |
| 5233 | 035c03 | BP096810 | MXL065c03 |   |   | 17.0  | 12.2  | 10.4  | 0.7 | 0.1 | 1.2 | 0.3 |
| 5234 | 116h06 | AV631996 | HC002f08  |   |   | 7.3   | 12.7  | 10.9  | 1.9 | 0.9 | 1.2 | 0.6 |
| 5235 | 131b12 | AV643947 | HCL078h12 |   |   | 28.0  | 33.2  | 27.5  | 1.2 | 0.3 | 1.2 | 0.1 |
| 5236 | 164b07 | BP094650 | MXL026d07 |   |   | 35.6  | 44.8  | 36.4  | 1.2 | 0.4 | 1.2 | 0.4 |
| 5237 | 144f11 | AV626321 | LCL006h04 |   |   | 53.6  | 38.4  | 35.4  | 0.7 | 0.1 | 1.2 | 0.6 |
| 5238 | 107d01 | AV397656 | CM009b01  |   |   | 20.7  | 29.0  | 25.3  | 1.4 | 0.1 | 1.2 | 0.2 |
| 5239 | 104c09 | AV395823 | CL48a02   |   |   | 5.3   | 5.1   | 4.5   | 1.0 | 0.1 | 1.2 | 0.3 |
| 5240 | 025h07 | AV627905 | LCL033f11 |   |   |       |       |       |     |     |     |     |

|      | A      | B        | C         | D | E | F     | G     | H     | I   | J   | K   | L   |
|------|--------|----------|-----------|---|---|-------|-------|-------|-----|-----|-----|-----|
| 5241 | 009g01 | AV392424 | CM097b05  |   |   | 14.8  | 18.7  | 16.7  | 1.4 | 0.4 | 1.2 | 0.3 |
| 5242 | 105f09 | AV396708 | CL67c10   |   |   | 7.8   | 8.8   | 7.6   | 1.1 | 0.2 | 1.2 | 0.5 |
| 5243 | 114g03 | AV390525 | CM080c07  |   |   | 9.5   | 12.1  | 10.3  | 1.3 | 0.2 | 1.2 | 0.3 |
| 5244 | 137b12 | AV621326 | LC034d07  |   |   | 15.4  | 17.8  | 16.1  | 1.2 | 0.1 | 1.2 | 0.5 |
| 5245 | 146b10 | AV627018 | LCL019h06 |   |   | 5.0   | 4.7   | 4.0   | 0.9 | 0.1 | 1.2 | 0.2 |
| 5246 | 146b05 | AV627000 | LCL019f02 |   |   | 17.0  | 17.8  | 14.7  | 1.1 | 0.3 | 1.2 | 0.1 |
| 5247 | 141g02 | AV624708 | LC081e04  |   |   | 13.3  | 13.8  | 11.6  | 1.1 | 0.2 | 1.2 | 0.2 |
| 5248 | 141d09 | AV624466 | LC078b05  |   |   | 8.5   | 7.4   | 6.2   | 0.9 | 0.1 | 1.2 | 0.3 |
| 5249 | 029g06 | AV631074 | LCL088d06 |   |   | 26.1  | 31.5  | 26.3  | 1.2 | 0.2 | 1.2 | 0.1 |
| 5250 | 108d06 | AV387283 | CM018e02  |   |   | 4.8   | 5.6   | 4.7   | 1.2 | 0.3 | 1.2 | 0.2 |
| 5251 | 138d01 | AV622215 | LC046f11  |   |   | 21.5  | 15.7  | 12.8  | 0.7 | 0.2 | 1.2 | 0.5 |
| 5252 | 115e08 | AV391027 | CM089c05  |   |   | 593.0 | 583.7 | 495.1 | 0.9 | 0.3 | 1.2 | 0.7 |
| 5253 | 113e03 | AV393204 | CM068c03  |   |   | 21.0  | 23.8  | 20.8  | 1.1 | 0.2 | 1.2 | 0.4 |
| 5254 | 109f11 | AV388330 | CM028f06  |   |   | 14.9  | 11.8  | 10.0  | 0.8 | 0.2 | 1.2 | 0.2 |
| 5255 | 154f06 | AV631066 | LCL088c09 |   |   | 74.3  | 38.6  | 32.1  | 0.5 | 0.1 | 1.2 | 0.1 |
| 5256 | 127d04 | AV641766 | HCL039h09 |   |   | 7.3   | 10.2  | 8.4   | 1.4 | 0.3 | 1.2 | 0.1 |
| 5257 | 018c06 | AV644344 | HCL086g07 |   |   | 6.4   | 8.8   | 7.4   | 1.4 | 0.1 | 1.2 | 0.3 |
| 5258 | 111c12 | AV390448 | CM046d12  |   |   | 7.0   | 7.1   | 5.8   | 1.0 | 0.3 | 1.2 | 0.3 |
| 5259 | 138a08 | AV622060 | LC044e05  |   |   | 13.6  | 10.7  | 9.3   | 0.8 | 0.2 | 1.2 | 0.3 |
| 5260 | 131g05 | AV644291 | HCL085f05 |   |   | 57.8  | 33.5  | 33.8  | 0.5 | 0.2 | 1.2 | 0.9 |
| 5261 | 106d11 | AV397330 | CL8e0e7   |   |   | 4.6   | 3.9   | 3.3   | 0.9 | 0.4 | 1.2 | 0.2 |
| 5262 | 129g08 | AV643022 | HCL062d08 |   |   | 194.5 | 198.4 | 158.1 | 1.0 | 0.3 | 1.2 | 0.3 |
| 5263 | 118h01 | AV634280 | HC031d05  |   |   | 8.4   | 7.2   | 6.0   | 1.1 | 0.8 | 1.2 | 0.2 |
| 5264 | 020d02 | AV620950 | LC029a12  |   |   | 15.2  | 12.3  | 10.5  | 0.9 | 0.2 | 1.2 | 0.2 |
| 5265 | 145a05 | AV626466 | LCL009f03 |   |   | 17.9  | 13.1  | 11.5  | 0.7 | 0.2 | 1.2 | 0.4 |
| 5266 | 025a06 | AV627013 | LCL019g09 |   |   | 28.6  | 27.8  | 24.7  | 1.0 | 0.2 | 1.2 | 0.5 |
| 5267 | 025e06 | AV627485 | LCL027d09 |   |   | 2.4   | 1.6   | 1.4   | 0.7 | 0.3 | 1.2 | 0.3 |
| 5268 | 122b04 | AV637881 | HC078h02  |   |   | 9.3   | 7.6   | 6.8   | 0.8 | 0.2 | 1.2 | 0.4 |
| 5269 | 010c12 | AV632597 | HC010b08  |   |   | 4.5   | 4.4   | 3.7   | 1.0 | 0.2 | 1.2 | 0.2 |
| 5270 | 126f01 | AV641353 | HCL032b04 |   |   | 6.4   | 6.5   | 5.8   | 1.0 | 0.2 | 1.2 | 0.4 |
| 5271 | 021a07 | AV621889 | LC042c04  |   |   | 37.2  | 37.0  | 33.0  | 1.0 | 0.3 | 1.2 | 0.6 |
| 5272 | 139h08 | AV623449 | LC063h10  |   |   | 4.8   | 7.5   | 6.3   | 1.6 | 0.4 | 1.2 | 0.2 |
| 5273 | 017h08 | AV643960 | HCL079b06 |   |   | 10.2  | 10.2  | 10.3  | 1.2 | 0.7 | 1.2 | 0.8 |
| 5274 | 014h07 | AV640533 | HCL017h08 |   |   | 4.3   | 6.3   | 5.2   | 1.5 | 0.3 | 1.2 | 0.3 |
| 5275 | 169c02 | BP096875 | MXL066c05 |   |   | 60.8  | 74.9  | 59.9  | 1.2 | 0.1 | 1.2 | 0.2 |
| 5276 | 125f12 | AV640765 | HCL022a07 |   |   | 5.9   | 5.5   | 5.0   | 0.9 | 0.1 | 1.2 | 0.4 |
| 5277 | 140e10 | AV623910 | LC070d02  |   |   | 17.3  | 16.2  | 14.0  | 1.0 | 0.4 | 1.2 | 0.5 |
| 5278 | 131c08 | AV644012 | HCL080b10 |   |   | 17.0  | 19.2  | 16.0  | 1.1 | 0.2 | 1.2 | 0.2 |
| 5279 | 023f12 | AV626017 | LCL001b04 |   |   | 2.0   | 5.7   | 4.6   | 2.6 | 1.7 | 1.2 | 0.1 |
| 5280 | 101d01 | AV393576 | CL05d12   |   |   | 5.1   | 9.7   | 8.5   | 2.0 | 0.5 | 1.2 | 0.3 |
| 5281 | 032a12 | BP087800 | MX043h02  |   |   | 46.1  | 44.1  | 41.2  | 1.0 | 0.4 | 1.2 | 0.7 |
| 5282 | 134g02 | AV619490 | LC009a06  |   |   | 226.5 | 274.0 | 238.5 | 1.2 | 0.0 | 1.2 | 0.3 |
| 5283 | 168h06 | BP096728 | MXL063h01 |   |   | 7.0   | 7.4   | 8.6   | 0.9 | 0.5 | 1.2 | 1.2 |
| 5284 | 032c11 | BP093129 | MXL003g12 |   |   | 27.4  | 32.3  | 26.9  | 1.2 | 0.5 | 1.2 | 0.1 |
| 5285 | 019a04 | AV619383 | LC007f04  |   |   | 6.4   | 6.0   | 5.3   | 1.0 | 0.2 | 1.2 | 0.5 |
| 5286 | 117d05 | AV632624 | HC010e07  |   |   | 9.7   | 8.3   | 6.9   | 0.9 | 0.2 | 1.2 | 0.1 |
| 5287 | 137d05 | AV621517 | LC037b10  |   |   | 7.7   | 6.8   | 5.7   | 1.1 | 0.6 | 1.2 | 0.1 |
| 5288 | 014a04 | AV639678 | HCL002h12 |   |   | 6.3   | 8.8   | 7.3   | 1.4 | 0.2 | 1.2 | 0.3 |
| 5289 | 141h10 | AV624815 | LC083b04  |   |   | 9.7   | 9.1   | 7.8   | 1.0 | 0.3 | 1.2 | 0.2 |
| 5290 | 154b07 | AV630832 | LCL084h08 |   |   | 18.5  | 23.7  | 19.2  | 1.3 | 0.1 | 1.2 | 0.3 |
| 5291 | 026b02 | AV628075 | LCL036c11 |   |   | 57.8  | 69.1  | 71.0  | 1.3 | 0.4 | 1.2 | 0.6 |
| 5292 | 026e04 | AV628364 | LCL040f04 |   |   | 52.5  | 41.9  | 34.4  | 0.8 | 0.3 | 1.2 | 0.2 |
| 5293 | 031g11 | BP087391 | MX033e10  |   |   | 48.0  | 70.9  | 64.9  | 1.9 | 1.2 | 1.2 | 0.3 |
| 5294 | 027d09 | AV629183 | LCL053g10 |   |   | 13.1  | 9.3   | 7.7   | 0.9 | 0.6 | 1.2 | 0.3 |
| 5295 | 008a05 | AV392653 | CM062h12  |   |   | 8.1   | 14.0  | 11.9  | 1.7 | 0.2 | 1.2 | 0.2 |
| 5296 | 148a09 | AV627816 | LCL032d10 |   |   | 35.7  | 32.4  | 27.2  | 0.9 | 0.2 | 1.2 | 0.1 |
| 5297 | 020g12 | AV621525 | LC037c06  |   |   | 4.6   | 7.5   | 6.3   | 1.6 | 0.3 | 1.2 | 0.1 |
| 5298 | 135c05 | BP383777 | LC014b01  |   |   | 42.0  | 55.8  | 47.6  | 1.4 | 0.3 | 1.2 | 0.2 |
| 5299 | 143a10 | AV625562 | LC094f06  |   |   | 22.4  | 20.7  | 17.3  | 1.0 | 0.3 | 1.2 | 0.3 |
| 5300 | 114f04 | AV389116 | CM078f08  |   |   | 7.1   | 6.6   | 6.0   | 1.0 | 0.2 | 1.2 | 0.6 |
| 5301 | 104a04 | AV395534 | CL43f01   |   |   | 3.3   | 4.6   | 4.5   | 1.4 | 0.1 | 1.2 | 0.8 |
| 5302 | 101c03 | AV393418 | CL03e09   |   |   | 6.1   | 8.0   | 6.8   | 1.4 | 0.3 | 1.2 | 0.1 |
| 5303 | 013c04 | AV638252 | HC083h07  |   |   | 7.3   | 6.4   | 5.6   | 0.9 | 0.2 | 1.2 | 0.2 |
| 5304 | 106e03 | AV386495 | CM001a02  |   |   | 8.5   | 7.4   | 5.8   | 0.8 | 0.2 | 1.2 | 0.4 |
| 5305 | 166d07 | BP095625 | MXL044g10 |   |   | 26.2  | 44.3  | 37.9  | 1.8 | 0.6 | 1.2 | 0.3 |
| 5306 | 131e04 | AV644162 | HCL083b05 |   |   | 37.0  | 55.0  | 45.8  | 1.8 | 1.0 | 1.2 | 0.2 |
| 5307 | 120a08 | AV635673 | HC049d05  |   |   | 73.9  | 89.5  | 77.7  | 1.2 | 0.2 | 1.2 | 0.2 |
| 5308 | 151c01 | AV629383 | LCL057f12 |   |   | 6.0   | 5.1   | 4.4   | 0.9 | 0.2 | 1.2 | 0.3 |
| 5309 | 135f05 | AV620090 | LC017d11  |   |   | 4.5   | 5.7   | 4.8   | 1.3 | 0.4 | 1.2 | 0.4 |
| 5310 | 121b05 | AV636858 | HC065c02  |   |   | 15.3  | 19.1  | 17.1  | 1.2 | 0.2 | 1.2 | 0.6 |
| 5311 | 026d04 | AV628305 | LCL039g12 |   |   | 7.0   | 6.8   | 5.7   | 1.0 | 0.1 | 1.2 | 0.1 |
| 5312 | 130f11 | AV643639 | HCL073c02 |   |   | 10.0  | 10.6  | 9.0   | 1.1 | 0.0 | 1.2 | 0.2 |
| 5313 | 168d06 | BP096481 | MXL059d07 |   |   | 15.9  | 24.4  | 21.3  | 1.5 | 0.1 | 1.2 | 0.3 |
| 5314 | 138h11 | AV622728 | LC053f09  |   |   | 37.0  | 41.9  | 37.0  | 1.1 | 0.1 | 1.2 | 0.4 |
| 5315 | 127h05 | AV642046 | HCL044d10 |   |   | 11.3  | 11.6  | 12.2  | 1.0 | 0.1 | 1.2 | 0.6 |
| 5316 | 117c08 | AV632467 | HC008f02  |   |   | 3.0   | 3.2   | 2.7   | 1.1 | 0.4 | 1.2 | 0.3 |
| 5317 | 036e06 | BP098322 | MXL091e04 |   |   | 99.5  | 77.1  | 66.2  | 0.8 | 0.2 | 1.2 | 0.4 |
| 5318 | 008f06 | AV388929 | CM073h11  |   |   | 7.9   | 9.5   | 7.9   | 1.2 | 0.2 | 1.2 | 0.4 |
| 5319 | 029f02 | AV630943 | LCL086f09 |   |   | 35.3  | 27.1  | 37.8  | 0.8 | 0.1 | 1.2 | 0.8 |
| 5320 | 126f05 | AV641372 | HCL032e03 |   |   | 10.1  | 9.5   | 8.3   | 1.0 | 0.2 | 1.2 | 0.4 |
| 5321 | 120e10 | AV636136 | HC055f03  |   |   | 6.8   | 4.5   | 4.1   | 0.7 | 0.1 | 1.2 | 0.6 |
| 5322 | 130e07 | AV643541 | HCL071d05 |   |   | 19.1  | 20.9  | 18.0  | 1.2 | 0.3 | 1.2 | 0.2 |
| 5323 | 025h12 | AV627953 | LCL034d08 |   |   | 29.3  | 49.5  | 45.3  | 2.0 | 0.8 | 1.2 | 0.4 |
| 5324 | 129f02 | AV642953 | HCL061b05 |   |   | 6.6   | 8.2   | 6.9   | 1.3 | 0.1 | 1.2 | 0.1 |
| 5325 | 036f12 | BP098584 | MXL095h04 |   |   | 5.7   | 7.2   | 6.1   | 1.3 | 0.1 | 1.2 | 0.1 |
| 5326 | 019a05 | AV619392 | LC007g03  |   |   | 13.3  | 10.8  | 9.3   | 1.0 | 0.6 | 1.2 | 0.3 |
| 5327 | 128c03 | AV642246 | HCL048c07 |   |   | 5.0   | 5.2   | 4.4   | 1.1 | 0.2 | 1.2 | 0.2 |
| 5328 | 141d01 | AV624426 | LC077f03  |   |   | 12.2  | 11.5  | 10.2  | 0.9 | 0.1 | 1.2 | 0.3 |
| 5329 | 031h03 | BP087413 | MX034a05  |   |   | 17.3  | 17.9  | 15.7  | 1.1 | 0.2 | 1.2 | 0.2 |
| 5330 | 118h02 | AV641036 | HCL026f03 |   |   | 7.7   | 10.1  | 8.5   | 1.3 | 0.3 | 1.2 | 0.5 |
| 5331 | 006d06 | AV389793 | CM039g03  |   |   | 5.5   | 10.0  | 9.1   | 2.0 | 1.3 | 1.2 | 0.8 |
| 5332 | 116e02 | AV392779 | CM099f10  |   |   | 5.5   | 6.2   | 5.4   | 1.2 | 0.3 | 1.2 | 0.3 |
| 5333 | 027e06 | AV629249 | LCL055c02 |   |   | 3.8   | 4.5   | 3.9   | 1.2 | 0.3 | 1.2 | 0.4 |
| 5334 | 104a10 | AV395622 | CL44b08   |   |   | 14.2  | 11.8  | 10.5  | 0.8 | 0.1 | 1.2 | 0.5 |
| 5335 | 124a11 | AV639961 | HCL007h12 |   |   | 10.3  | 8.2   | 6.9   | 0.8 | 0.1 | 1.2 | 0.3 |
| 5336 | 020g06 | AV621428 | LC036a03  |   |   | 21.3  | 21.9  | 21.1  | 1.1 | 0.4 | 1.2 | 0.6 |
| 5337 | 009e02 | AV391593 | CM092c08  |   |   | 7.9   | 10.8  | 9.0   | 1.4 | 0.4 | 1.2 | 0.3 |
| 5338 | 168f11 | BP096657 | MXL062e07 |   |   | 99.3  | 100.7 | 92.4  | 1.0 | 0.1 | 1.2 | 0.5 |
| 5339 | 120f04 | AV636234 | HC056g11  |   |   | 7.6   | 10.8  | 8.9   | 1.4 | 0.2 | 1.2 | 0.2 |
| 5340 | 003b12 | AV396235 | CL58a11   |   |   | 76.0  | 69.4  | 60.0  | 0.9 | 0.1 | 1.2 | 0.2 |
| 5341 | 120a04 | AV635654 | HC049b06  |   |   | 4.7   | 24.9  | 21.3  | 5.3 | 1.2 | 1.2 | 0.2 |
| 5342 | 111d10 | AV390723 | CM047c12  |   |   | 10.7  | 20.5  | 17.5  | 2.0 | 0.4 | 1.2 | 0.1 |
| 5343 | 105f12 | AV396713 | CL67g10   |   |   | 4.4   | 3.7   | 3.1   | 0.9 | 0.2 | 1.2 | 0.3 |
| 5344 | 108d07 | AV387258 | CM018f06  |   |   | 4.6   | 4.0   | 3.4   | 0.9 | 0.2 | 1.2 | 0.3 |
| 5345 | 024d05 | AV626527 | LCL010f05 |   |   | 9.6   | 10.6  | 9.0   | 1.1 | 0.3 | 1.2 | 0.2 |
| 5346 | 117b01 | AV632197 | HC005b10  |   |   | 20.4  | 24.7  | 22.8  | 1.4 | 0.5 | 1.2 | 0.3 |
| 5347 | 137e10 | AV621697 | LC039g09  |   |   | 35.1  |       |       |     |     |     |     |

|      | A      | B        | C         | D | E | F      | G      | H     | I   | J   | K   | L   |
|------|--------|----------|-----------|---|---|--------|--------|-------|-----|-----|-----|-----|
| 5348 | 111e04 | AV390790 | CM048b11  |   |   | 11.7   | 11.0   | 9.3   | 0.9 | 0.1 | 1.2 | 0.2 |
| 5349 | 109d10 | AV387552 | CM026f05  |   |   | 10.7   | 10.4   | 8.9   | 1.0 | 0.3 | 1.2 | 0.1 |
| 5350 | 133f01 | AV645110 | HCL098d02 |   |   | 9.0    | 10.3   | 8.7   | 1.2 | 0.1 | 1.2 | 0.2 |
| 5351 | 013c05 | AV638263 | HC084a09  |   |   | 19.2   | 22.3   | 18.7  | 1.2 | 0.6 | 1.2 | 0.5 |
| 5352 | 141b12 | AV624344 | LC076d11  |   |   | 7.8    | 8.3    | 7.0   | 1.1 | 0.3 | 1.2 | 0.2 |
| 5353 | 144g12 | AV626406 | LCL008e12 |   |   | 15.2   | 13.8   | 12.0  | 0.9 | 0.2 | 1.2 | 0.4 |
| 5354 | 021g12 | AV622943 | LC056h04  |   |   | 4.5    | 7.7    | 6.9   | 1.8 | 0.4 | 1.2 | 0.3 |
| 5355 | 114d06 | AV389670 | CM076e07  |   |   | 4.2    | 4.8    | 4.6   | 1.1 | 0.1 | 1.2 | 0.6 |
| 5356 | 136e05 | AV620732 | LC026b04  |   |   | 8.0    | 7.9    | 6.8   | 1.0 | 0.2 | 1.2 | 0.2 |
| 5357 | 132f04 | AV644772 | HCL093e09 |   |   | 18.0   | 37.8   | 31.8  | 2.2 | 0.9 | 1.2 | 0.0 |
| 5358 | 103e03 | AV395260 | CL37d04   |   |   | 4.7    | 4.8    | 4.4   | 1.0 | 0.1 | 1.2 | 0.5 |
| 5359 | 151c04 | AV629403 | LCL058b05 |   |   | 7.3    | 7.3    | 6.2   | 1.2 | 0.7 | 1.2 | 0.2 |
| 5360 | 159g05 | BP088068 | MX050g05  |   |   | 37.2   | 36.2   | 31.1  | 1.0 | 0.5 | 1.2 | 0.7 |
| 5361 | 132e11 | AV644725 | HCL092h12 |   |   | 22.1   | 30.7   | 26.7  | 1.4 | 0.2 | 1.2 | 0.5 |
| 5362 | 010a06 | AV632108 | HC004a08  |   |   | 9.8    | 9.9    | 8.4   | 1.0 | 0.3 | 1.2 | 0.2 |
| 5363 | 116f04 | AV392864 | CM100f04  |   |   | 5.4    | 5.3    | 4.5   | 1.0 | 0.2 | 1.2 | 0.1 |
| 5364 | 141b06 | AV624324 | LC076b08  |   |   | 44.2   | 31.2   | 28.9  | 0.7 | 0.3 | 1.2 | 0.8 |
| 5365 | 153e08 | AV630532 | LCL080d02 |   |   | 8.5    | 8.7    | 7.3   | 1.0 | 0.2 | 1.2 | 0.2 |
| 5366 | 130e03 | AV643512 | HCL070h09 |   |   | 10.9   | 11.3   | 9.7   | 1.0 | 0.1 | 1.2 | 0.3 |
| 5367 | 119a05 | AV634498 | HC034b08  |   |   | 7.1    | 6.7    | 5.6   | 1.0 | 0.1 | 1.2 | 0.2 |
| 5368 | 141e12 | AV624587 | LC079g08  |   |   | 6.5    | 12.7   | 10.1  | 2.5 | 1.7 | 1.2 | 0.3 |
| 5369 | 114b08 | AV388958 | CM073h08  |   |   | 7.9    | 8.3    | 7.0   | 1.1 | 0.3 | 1.2 | 0.1 |
| 5370 | 036b12 | BP097919 | MXL083e09 |   |   | 16.6   | 11.7   | 10.1  | 0.7 | 0.1 | 1.2 | 0.2 |
| 5371 | 127a02 | AV641601 | HCL037b06 |   |   | 8.7    | 7.7    | 6.9   | 0.9 | 0.2 | 1.2 | 0.4 |
| 5372 | 109d03 | AV388101 | CM025e09  |   |   | 4.5    | 4.3    | 3.7   | 1.0 | 0.1 | 1.2 | 0.3 |
| 5373 | 132d11 | AV644694 | HCL092d06 |   |   | 20.6   | 17.1   | 14.4  | 0.8 | 0.1 | 1.2 | 0.1 |
| 5374 | 147a12 | AV627384 | LCL026a02 |   |   | 9.0    | 7.6    | 7.6   | 0.9 | 0.1 | 1.2 | 0.6 |
| 5375 | 116e01 | AV393293 | CM099e10  |   |   | 6.8    | 8.2    | 6.9   | 1.3 | 0.6 | 1.2 | 0.3 |
| 5376 | 131e12 | AV644192 | HCL083f07 |   |   | 17.9   | 15.6   | 13.2  | 0.9 | 0.1 | 1.2 | 0.1 |
| 5377 | 020c03 | AV620847 | LC027f06  |   |   | 6.5    | 7.5    | 6.3   | 1.2 | 0.4 | 1.2 | 0.4 |
| 5378 | 140b06 | AV623644 | LC066f11  |   |   | 28.6   | 21.8   | 18.3  | 0.8 | 0.1 | 1.2 | 0.2 |
| 5379 | 028f04 | AV630165 | LCL074f05 |   |   | 42.1   | 43.9   | 38.2  | 1.0 | 0.0 | 1.2 | 0.2 |
| 5380 | 103g06 | AV395496 | CL42a08   |   |   | 102.7  | 69.0   | 61.0  | 0.8 | 0.2 | 1.2 | 0.4 |
| 5381 | 024f04 | AV626888 | LCL013g05 |   |   | 37.0   | 35.2   | 29.6  | 1.0 | 0.0 | 1.2 | 0.1 |
| 5382 | 109a01 | AV387803 | CM023a03  |   |   | 3.5    | 5.2    | 4.4   | 1.6 | 0.6 | 1.2 | 0.2 |
| 5383 | 149e01 | AV628504 | LCL042h07 |   |   | 8.1    | 5.7    | 4.9   | 0.7 | 0.1 | 1.2 | 0.1 |
| 5384 | 103f05 | AV395338 | CL40a05   |   |   | 129.5  | 116.2  | 99.9  | 0.9 | 0.0 | 1.2 | 0.3 |
| 5385 | 030e01 | AV631680 | LCL098b03 |   |   | 79.5   | 70.6   | 60.3  | 0.9 | 0.1 | 1.2 | 0.1 |
| 5386 | 163d02 | BP094238 | MXL020a01 |   |   | 3.2    | 3.0    | 2.7   | 1.0 | 0.4 | 1.2 | 0.4 |
| 5387 | 139d07 | AV623051 | LC058c05  |   |   | 16.8   | 16.7   | 14.2  | 1.0 | 0.3 | 1.2 | 0.1 |
| 5388 | 122c11 | AV638096 | HC081h06  |   |   | 88.1   | 92.5   | 82.1  | 1.1 | 0.2 | 1.2 | 0.2 |
| 5389 | 110e02 | AV389353 | CM036b09  |   |   | 10.8   | 12.5   | 10.7  | 1.2 | 0.2 | 1.2 | 0.1 |
| 5390 | 144c04 | AV626199 | LCL004b05 |   |   | 7.6    | 6.9    | 5.9   | 1.0 | 0.3 | 1.2 | 0.1 |
| 5391 | 143c12 | AV625680 | LC096d04  |   |   | 110.4  | 125.1  | 109.2 | 1.1 | 0.2 | 1.2 | 0.2 |
| 5392 | 133e01 | AV645068 | HCL097g05 |   |   | 19.2   | 22.5   | 19.6  | 1.2 | 0.0 | 1.2 | 0.3 |
| 5393 | 101d07 | AV393458 | CL07c07   |   |   | 5.9    | 6.8    | 5.8   | 1.2 | 0.2 | 1.2 | 0.1 |
| 5394 | 109b12 | AV388241 | CM024g11  |   |   | 5.4    | 5.2    | 4.4   | 1.0 | 0.2 | 1.2 | 0.3 |
| 5395 | 108d08 | AV387245 | CM018g03  |   |   | 6.2    | 7.1    | 6.0   | 1.1 | 0.3 | 1.2 | 0.3 |
| 5396 | 003e12 | AV396914 | CL68g01   |   |   | 4.8    | 3.1    | 3.7   | 0.6 | 0.1 | 1.2 | 1.1 |
| 5397 | 116c02 | AV393067 | CM097g04  |   |   | 18.9   | 28.8   | 24.4  | 1.5 | 0.1 | 1.2 | 0.1 |
| 5398 | 119b10 | AV634715 | HC036h07  |   |   | 29.5   | 36.2   | 31.8  | 1.3 | 0.5 | 1.2 | 0.2 |
| 5399 | 149b06 | AV628362 | LCL040f02 |   |   | 78.3   | 80.7   | 74.0  | 1.1 | 0.1 | 1.2 | 0.3 |
| 5400 | 106g01 | AV386584 | CM003a01  |   |   | 3.6    | 4.7    | 4.1   | 1.3 | 0.2 | 1.2 | 0.3 |
| 5401 | 157f12 | BP087126 | MX026b01  |   |   | 17.7   | 18.7   | 15.8  | 1.2 | 0.6 | 1.2 | 0.2 |
| 5402 | 132h11 | AV644871 | HCL094h07 |   |   | 4.7    | 5.3    | 4.6   | 1.2 | 0.2 | 1.2 | 0.4 |
| 5403 | 146g01 | AV627208 | LCL022g01 |   |   | 38.6   | 32.7   | 29.0  | 0.8 | 0.1 | 1.2 | 0.4 |
| 5404 | 117e10 | AV632816 | HC013a01  |   |   | 32.0   | 19.5   | 16.1  | 0.6 | 0.1 | 1.2 | 0.2 |
| 5405 | 123d10 | AV639582 | HCL001c12 |   |   | 13.8   | 16.9   | 14.4  | 1.2 | 0.4 | 1.2 | 0.3 |
| 5406 | 147b12 | AV627423 | LCL026e01 |   |   | 35.8   | 39.3   | 33.3  | 1.3 | 0.6 | 1.2 | 0.1 |
| 5407 | 135b06 | AV619743 | LC012e07  |   |   | 15.7   | 18.3   | 17.2  | 1.2 | 0.6 | 1.2 | 0.7 |
| 5408 | 119f01 | AV635183 | HC043a01  |   |   | 63.9   | 48.3   | 45.6  | 0.8 | 0.2 | 1.2 | 0.6 |
| 5409 | 140g11 | AV624097 | LC072h08  |   |   | 6.1    | 7.7    | 6.4   | 1.3 | 0.4 | 1.2 | 0.1 |
| 5410 | 028f07 | AV630187 | LCL075a06 |   |   | 13.8   | 13.6   | 12.7  | 1.0 | 0.1 | 1.2 | 0.5 |
| 5411 | 119a11 | AV634572 | HC035b01  |   |   | 4.8    | 4.4    | 3.7   | 0.9 | 0.2 | 1.2 | 0.3 |
| 5412 | 015b05 | AV640734 | HCL021e06 |   |   | 1205.0 | 1062.9 | 897.2 | 0.9 | 0.1 | 1.2 | 0.1 |
| 5413 | 123a03 | AV639099 | HC095a02  |   |   | 25.6   | 31.4   | 26.8  | 1.2 | 0.1 | 1.2 | 0.1 |
| 5414 | 001e10 | AV394019 | CL16e07   |   |   | 30.7   | 29.8   | 25.4  | 1.0 | 0.2 | 1.2 | 0.4 |
| 5415 | 010d09 | AV632746 | HC012a11  |   |   | 9.0    | 10.8   | 9.5   | 1.2 | 0.0 | 1.2 | 0.2 |
| 5416 | 128g07 | AV642538 | HCL053e12 |   |   | 7.3    | 7.4    | 6.6   | 1.1 | 0.3 | 1.2 | 0.4 |
| 5417 | 146d04 | AV627080 | LCL020g05 |   |   | 15.8   | 39.9   | 34.3  | 2.6 | 0.5 | 1.2 | 0.1 |
| 5418 | 146f03 | AV627165 | LCL022b01 |   |   | 18.0   | 17.5   | 14.8  | 1.0 | 0.1 | 1.2 | 0.2 |
| 5419 | 171d03 | BP097892 | MXL083a08 |   |   | 23.9   | 40.5   | 34.2  | 1.7 | 0.2 | 1.2 | 0.2 |
| 5420 | 153b10 | AV630378 | LCL078a06 |   |   | 19.3   | 24.3   | 20.3  | 1.3 | 0.1 | 1.2 | 0.3 |
| 5421 | 101d06 | AV393451 | CL07b08   |   |   | 5.8    | 9.0    | 7.6   | 1.6 | 0.4 | 1.2 | 0.1 |
| 5422 | 137f01 | AV621727 | LC040b12  |   |   | 4.3    | 2.8    | 3.2   | 0.7 | 0.3 | 1.2 | 0.8 |
| 5423 | 017b02 | AV642881 | HCL059g12 |   |   | 5.7    | 6.7    | 5.7   | 1.3 | 0.4 | 1.2 | 0.1 |
| 5424 | 137h01 | AV621909 | LC042e03  |   |   | 18.4   | 19.7   | 18.2  | 1.1 | 0.3 | 1.2 | 0.6 |
| 5425 | 116b02 | BP383685 | CM096d09  |   |   | 6.6    | 5.7    | 5.4   | 1.1 | 0.8 | 1.2 | 0.5 |
| 5426 | 129f12 | AV642997 | HCL061h07 |   |   | 15.7   | 14.8   | 13.7  | 1.0 | 0.3 | 1.2 | 0.5 |
| 5427 | 113a04 | AV392630 | CM062g10  |   |   | 4.2    | 5.1    | 4.5   | 1.3 | 0.6 | 1.2 | 0.3 |
| 5428 | 106c08 | AV397260 | CL77f12   |   |   | 11.4   | 10.4   | 13.7  | 0.9 | 0.1 | 1.2 | 0.9 |
| 5429 | 149a03 | AV628284 | LCL039e11 |   |   | 13.1   | 8.3    | 7.2   | 0.7 | 0.1 | 1.2 | 0.2 |
| 5430 | 135d01 | AV619808 | LC014h06  |   |   | 11.7   | 10.8   | 9.3   | 0.9 | 0.2 | 1.2 | 0.4 |
| 5431 | 130f12 | AV643650 | HCL073d06 |   |   | 10.0   | 10.4   | 9.7   | 1.0 | 0.1 | 1.2 | 0.4 |
| 5432 | 152a12 | AV629796 | LCL066c12 |   |   | 13.2   | 14.2   | 14.4  | 1.1 | 0.2 | 1.2 | 0.7 |
| 5433 | 006a07 | AV388882 | CM033e01  |   |   | 8.1    | 10.4   | 8.9   | 1.3 | 0.4 | 1.2 | 0.2 |
| 5434 | 147c07 | AV627463 | LCL027b07 |   |   | 10.3   | 10.7   | 10.0  | 1.1 | 0.2 | 1.2 | 0.4 |
| 5435 | 162c07 | BP093622 | MXL011a12 |   |   | 57.0   | 54.7   | 48.5  | 1.0 | 0.6 | 1.2 | 0.8 |
| 5436 | 028c05 | AV629821 | LCL066g10 |   |   | 12.8   | 12.8   | 10.9  | 1.0 | 0.1 | 1.2 | 0.2 |
| 5437 | 113d12 | AV393144 | CM067h06  |   |   | 48.5   | 59.9   | 50.8  | 1.3 | 0.2 | 1.2 | 0.2 |
| 5438 | 143h12 | BP098807 | MXL099d09 |   |   | 13.9   | 18.9   | 16.0  | 1.4 | 0.2 | 1.2 | 0.0 |
| 5439 | 108b01 | AV387475 | CM016d11  |   |   | 96.9   | 159.1  | 142.8 | 1.7 | 0.4 | 1.2 | 0.2 |
| 5440 | 153a09 | AV630300 | LCL078h05 |   |   | 7.4    | 7.4    | 6.5   | 1.1 | 0.4 | 1.2 | 0.3 |
| 5441 | 167c10 | BP095978 | MXL050d08 |   |   | 7.0    | 8.4    | 7.2   | 1.3 | 0.5 | 1.2 | 0.1 |
| 5442 | 121f04 | AV637346 | HC071h12  |   |   | 24.1   | 29.6   | 27.1  | 1.2 | 0.1 | 1.2 | 0.4 |
| 5443 | 101h11 | AV394147 | CL17d06   |   |   | 3.2    | 3.7    | 3.4   | 1.2 | 0.2 | 1.2 | 0.4 |
| 5444 | 104a02 | AV395556 | CL43e04   |   |   | 3.1    | 6.1    | 6.1   | 1.9 | 0.3 | 1.2 | 0.8 |
| 5445 | 129b06 | AV642701 | HCL056c07 |   |   | 11.3   | 12.9   | 11.3  | 1.1 | 0.1 | 1.2 | 0.3 |
| 5446 | 114g02 | AV389837 | CM080b09  |   |   | 7.9    | 7.1    | 6.3   | 0.9 | 0.2 | 1.2 | 0.3 |
| 5447 | 002f04 | AV395560 | CL43h04   |   |   | 5.8    | 8.4    | 7.6   | 1.5 | 0.2 | 1.2 | 0.8 |
| 5448 | 109h12 | AV388707 | CM031e01  |   |   | 2.1    | 2.0    | 1.9   | 1.0 | 0.2 | 1.2 | 0.6 |
| 5449 | 108d02 | AV387239 | CM018b06  |   |   | 18.8   | 14.4   | 15.2  | 0.8 | 0.2 | 1.2 | 0.7 |
| 5450 | 147b08 | AV627413 | LCL026d03 |   |   | 26.0   | 24.0   | 20.6  | 0.9 | 0.1 | 1.2 | 0.1 |
| 5451 | 019e06 | AV619986 | LC015h06  |   |   | 3.9    | 3.6    | 3.5   | 1.0 | 0.3 | 1.2 | 0.6 |
| 5452 | 170f02 | BP097491 | MXL076f06 |   |   | 10.4   | 7.8    | 7.3   | 0.7 | 0.3 | 1.2 | 0.7 |
| 5453 | 145e08 | AV626731 | LCL014e10 |   |   | 18.4   | 16.9   | 16.2  | 0.9 | 0.1 | 1.2 | 0.6 |
| 5454 | 138e04 | AV622319 | LC048a12  |   |   |        |        |       |     |     |     |     |

|      | A      | B        | C         | D | E | F     | G     | H     | I   | J   | K   | L   |
|------|--------|----------|-----------|---|---|-------|-------|-------|-----|-----|-----|-----|
| 5455 | 147b02 | AV627386 | LCL026a05 |   |   | 18.3  | 16.4  | 14.5  | 0.9 | 0.2 | 1.2 | 0.2 |
| 5456 | 014h06 | AV640529 | HCL017h04 |   |   | 9.2   | 8.7   | 7.6   | 0.9 | 0.4 | 1.2 | 0.6 |
| 5457 | 139a06 | AV622765 | LC054c02  |   |   | 6.4   | 3.8   | 3.5   | 0.7 | 0.4 | 1.2 | 0.4 |
| 5458 | 110a11 | AV388830 | CM033b05  |   |   | 4.6   | 6.0   | 5.3   | 1.3 | 0.3 | 1.2 | 0.4 |
| 5459 | 011c05 | AV634534 | HC034f07  |   |   | 40.7  | 44.1  | 40.6  | 1.1 | 0.1 | 1.2 | 0.5 |
| 5460 | 169f06 | BP097067 | MXL069e06 |   |   | 110.0 | 103.4 | 93.6  | 0.9 | 0.1 | 1.2 | 0.4 |
| 5461 | 108a10 | AV387494 | CM016b08  |   |   | 12.1  | 14.0  | 11.6  | 1.1 | 0.2 | 1.2 | 0.3 |
| 5462 | 113a08 | AV392696 | CM063b11  |   |   | 12.5  | 12.2  | 10.4  | 1.0 | 0.1 | 1.2 | 0.2 |
| 5463 | 108h04 | AV387834 | CM022d08  |   |   | 7.2   | 8.4   | 7.0   | 1.2 | 0.4 | 1.2 | 0.4 |
| 5464 | 014f05 | AV640221 | HCL012d09 |   |   | 21.3  | 27.8  | 25.9  | 1.4 | 0.6 | 1.2 | 0.5 |
| 5465 | 115a07 | AV390434 | CM083c02  |   |   | 161.3 | 195.1 | 167.0 | 1.2 | 0.0 | 1.2 | 0.2 |
| 5466 | 150b09 | AV628908 | LCL048g09 |   |   | 27.0  | 32.9  | 28.0  | 1.2 | 0.2 | 1.2 | 0.1 |
| 5467 | 126b07 | AV641059 | HCL027a11 |   |   | 6.0   | 5.2   | 4.4   | 0.9 | 0.3 | 1.2 | 0.4 |
| 5468 | 016f12 | AV642473 | HCL052d12 |   |   | 6.6   | 5.6   | 7.3   | 0.9 | 0.3 | 1.2 | 0.9 |
| 5469 | 162d03 | BP093672 | MXL011h03 |   |   | 13.1  | 14.4  | 12.3  | 1.1 | 0.1 | 1.2 | 0.1 |
| 5470 | 121a12 | AV636799 | HC064c10  |   |   | 11.7  | 8.2   | 7.0   | 0.7 | 0.1 | 1.2 | 0.1 |
| 5471 | 102c11 | AV394317 | CL20g05   |   |   | 19.5  | 25.9  | 22.5  | 1.4 | 0.4 | 1.2 | 0.3 |
| 5472 | 108d09 | AV387265 | CM018h06  |   |   | 19.1  | 16.9  | 14.5  | 0.9 | 0.1 | 1.2 | 0.1 |
| 5473 | 116h07 | AV631997 | HC002f09  |   |   | 5.9   | 6.3   | 5.5   | 1.1 | 0.5 | 1.2 | 0.5 |
| 5474 | 167g07 | BP096188 | MXL054c06 |   |   | 9.5   | 13.6  | 13.2  | 1.8 | 1.7 | 1.2 | 1.0 |
| 5475 | 142d08 | AV625167 | LC088g06  |   |   | 4.3   | 4.7   | 4.1   | 1.2 | 0.4 | 1.2 | 0.2 |
| 5476 | 164f07 | BP094841 | MXL030h02 |   |   | 5.5   | 6.5   | 5.7   | 1.2 | 0.2 | 1.2 | 0.3 |
| 5477 | 117g01 | AV633041 | HC016a02  |   |   | 6.0   | 5.6   | 4.8   | 1.0 | 0.4 | 1.2 | 0.1 |
| 5478 | 133c11 | AV645020 | HCL097a12 |   |   | 8.9   | 8.6   | 7.6   | 1.0 | 0.0 | 1.2 | 0.2 |
| 5479 | 011a04 | AV633945 | HC027c06  |   |   | 6.9   | 7.2   | 6.3   | 1.1 | 0.2 | 1.2 | 0.2 |
| 5480 | 139c09 | AV622988 | LC057e02  |   |   | 4.4   | 5.7   | 5.0   | 1.3 | 0.3 | 1.2 | 0.4 |
| 5481 | 031d11 | BP086887 | MX019e12  |   |   | 20.7  | 21.2  | 18.5  | 1.0 | 0.0 | 1.2 | 0.2 |
| 5482 | 128f12 | AV642480 | HCL052e09 |   |   | 15.3  | 19.0  | 16.1  | 1.2 | 0.1 | 1.2 | 0.2 |
| 5483 | 024d03 | AV626515 | LCL010d09 |   |   | 13.3  | 9.4   | 8.0   | 0.7 | 0.2 | 1.2 | 0.3 |
| 5484 | 007b02 | AV391078 | CM050f07  |   |   | 24.1  | 24.8  | 22.3  | 1.1 | 0.4 | 1.2 | 0.5 |
| 5485 | 009a09 | AV390336 | CM082h08  |   |   | 24.1  | 27.4  | 23.4  | 1.1 | 0.1 | 1.2 | 0.1 |
| 5486 | 031f10 | BP087255 | MX029b06  |   |   | 13.1  | 28.4  | 23.3  | 2.1 | 0.7 | 1.2 | 0.4 |
| 5487 | 159f01 | BP087901 | MX046b06  |   |   | 18.1  | 15.4  | 13.1  | 0.9 | 0.1 | 1.2 | 0.1 |
| 5488 | 030h11 | BP086313 | MX006d03  |   |   | 99.6  | 75.0  | 69.0  | 0.7 | 0.1 | 1.2 | 0.5 |
| 5489 | 161e10 | BP093215 | MXL005b03 |   |   | 12.5  | 13.4  | 11.2  | 1.1 | 0.4 | 1.2 | 0.3 |
| 5490 | 164h01 | BP094958 | MXL033d01 |   |   | 9.1   | 10.1  | 10.6  | 1.2 | 0.8 | 1.2 | 0.9 |
| 5491 | 143b07 | BP383828 | LC095d08  |   |   | 30.0  | 22.6  | 23.2  | 0.7 | 0.2 | 1.2 | 0.7 |
| 5492 | 112d08 | AV391826 | CM056f12  |   |   | 6.7   | 6.6   | 5.8   | 1.0 | 0.4 | 1.2 | 0.3 |
| 5493 | 033g11 | BP094979 | MXL033g05 |   |   | 41.2  | 32.7  | 33.4  | 0.8 | 0.3 | 1.2 | 0.8 |
| 5494 | 139h01 | BP383804 | LC063d03  |   |   | 180.8 | 160.5 | 149.0 | 0.9 | 0.1 | 1.2 | 0.3 |
| 5495 | 011g01 | AV635337 | HC045b01  |   |   | 51.6  | 45.4  | 38.9  | 0.9 | 0.1 | 1.2 | 0.2 |
| 5496 | 144g08 | AV626375 | LCL008a11 |   |   | 16.2  | 13.3  | 11.7  | 0.8 | 0.1 | 1.2 | 0.2 |
| 5497 | 033a10 | BP093972 | MXL016d11 |   |   | 31.4  | 42.6  | 36.5  | 1.4 | 0.1 | 1.2 | 0.1 |
| 5498 | 151f05 | AV629600 | LCL061g07 |   |   | 11.4  | 25.4  | 25.1  | 2.3 | 0.2 | 1.2 | 0.6 |
| 5499 | 117f09 | AV632984 | HC015b10  |   |   | 23.7  | 23.0  | 21.4  | 1.0 | 0.1 | 1.2 | 0.4 |
| 5500 | 131b01 | AV643868 | HCL077d11 |   |   | 26.2  | 26.6  | 23.8  | 1.1 | 0.2 | 1.2 | 0.3 |
| 5501 | 134f10 | AV619459 | LC008f04  |   |   | 10.0  | 14.0  | 12.1  | 1.4 | 0.4 | 1.2 | 0.2 |
| 5502 | 158e04 | BP087656 | MX040d12  |   |   | 6.8   | 11.0  | 9.5   | 1.6 | 0.3 | 1.2 | 0.4 |
| 5503 | 128g08 | AV642541 | HCL053f05 |   |   | 11.9  | 12.3  | 10.5  | 1.1 | 0.2 | 1.2 | 0.1 |
| 5504 | 151a02 | AV629284 | LCL055h05 |   |   | 8.7   | 23.0  | 19.5  | 3.4 | 2.3 | 1.2 | 0.3 |
| 5505 | 113h03 | AV388374 | CM070h12  |   |   | 62.3  | 55.1  | 52.9  | 0.9 | 0.1 | 1.2 | 0.6 |
| 5506 | 129d12 | AV642875 | HCL059f11 |   |   | 43.4  | 46.4  | 39.6  | 1.1 | 0.1 | 1.2 | 0.3 |
| 5507 | 143d06 | AV625694 | LC096e08  |   |   | 15.2  | 19.5  | 16.7  | 1.3 | 0.4 | 1.2 | 0.2 |
| 5508 | 109e01 | AV387585 | CM026h10  |   |   | 8.9   | 14.1  | 12.5  | 1.6 | 0.2 | 1.2 | 0.3 |
| 5509 | 032h01 | BP093653 | MXL011e07 |   |   | 3.6   | 5.2   | 5.6   | 1.7 | 0.8 | 1.2 | 0.7 |
| 5510 | 101e09 | AV393693 | CL10h08   |   |   | 120.6 | 90.5  | 80.8  | 0.8 | 0.2 | 1.2 | 0.4 |
| 5511 | 157d07 | BP086885 | MX019e09  |   |   | 48.1  | 51.2  | 44.2  | 1.2 | 0.4 | 1.2 | 0.1 |
| 5512 | 141e07 | AV624562 | LC079d10  |   |   | 7.1   | 8.2   | 7.4   | 1.2 | 0.3 | 1.2 | 0.3 |
| 5513 | 109g04 | AV388409 | CM029e08  |   |   | 5.8   | 8.1   | 7.0   | 1.4 | 0.3 | 1.2 | 0.2 |
| 5514 | 103a05 | AV394750 | CL30h01   |   |   | 16.8  | 24.5  | 21.3  | 1.7 | 0.6 | 1.2 | 0.3 |
| 5515 | 145c12 | AV626618 | LCL012d06 |   |   | 13.6  | 13.3  | 11.6  | 1.0 | 0.1 | 1.2 | 0.2 |
| 5516 | 101e10 | AV393772 | CL11a04   |   |   | 3.0   | 3.2   | 2.8   | 1.2 | 0.6 | 1.2 | 0.2 |
| 5517 | 115e06 | AV391052 | CM088h07  |   |   | 23.2  | 26.4  | 23.3  | 1.1 | 0.0 | 1.2 | 0.3 |
| 5518 | 145d11 | AV626709 | LCL014a12 |   |   | 12.5  | 12.6  | 11.6  | 1.0 | 0.2 | 1.2 | 0.4 |
| 5519 | 006f03 | AV390200 | CM043g09  |   |   | 32.1  | 36.0  | 31.1  | 1.2 | 0.5 | 1.2 | 0.1 |
| 5520 | 148e12 | AV628082 | LCL036d08 |   |   | 3.5   | 5.0   | 4.4   | 1.4 | 0.2 | 1.2 | 0.4 |
| 5521 | 148d11 | AV628024 | LCL035f02 |   |   | 38.2  | 39.5  | 35.2  | 1.0 | 0.1 | 1.2 | 0.2 |
| 5522 | 132b01 | AV644466 | HCL089a11 |   |   | 15.1  | 14.0  | 13.2  | 1.0 | 0.2 | 1.2 | 0.4 |
| 5523 | 007f01 | AV392005 | CM058a11  |   |   | 5.1   | 6.0   | 5.5   | 1.4 | 0.8 | 1.2 | 0.5 |
| 5524 | 124c04 | AV640077 | HCL009h08 |   |   | 23.9  | 27.5  | 23.9  | 1.2 | 0.2 | 1.2 | 0.2 |
| 5525 | 136a02 | AV620380 | LC021d08  |   |   | 7.9   | 7.8   | 6.7   | 1.0 | 0.1 | 1.2 | 0.0 |
| 5526 | 165f02 | BP095271 | MXL039b08 |   |   | 10.5  | 9.7   | 10.2  | 0.9 | 0.3 | 1.2 | 0.8 |
| 5527 | 153h11 | AV630724 | LCL083c10 |   |   | 4.5   | 4.8   | 4.2   | 1.0 | 0.2 | 1.2 | 0.3 |
| 5528 | 110b12 | AV388992 | CM034b11  |   |   | 5.2   | 5.2   | 4.6   | 1.0 | 0.4 | 1.2 | 0.4 |
| 5529 | 114h07 | AV390024 | CM082a02  |   |   | 31.9  | 30.1  | 26.0  | 0.9 | 0.1 | 1.2 | 0.1 |
| 5530 | 110a10 | AV388816 | CM033a05  |   |   | 8.8   | 8.8   | 7.4   | 1.1 | 0.4 | 1.2 | 0.2 |
| 5531 | 121a06 | AV636623 | HC062a03  |   |   | 4.9   | 4.9   | 4.2   | 1.0 | 0.1 | 1.2 | 0.3 |
| 5532 | 012e09 | AV637056 | HC068a12  |   |   | 10.7  | 10.4  | 8.9   | 1.0 | 0.2 | 1.2 | 0.3 |
| 5533 | 133b06 | BP383767 | HCL096d06 |   |   | 275.3 | 310.0 | 289.6 | 1.1 | 0.0 | 1.2 | 0.3 |
| 5534 | 123c11 | AV639497 | HC100b04  |   |   | 8.6   | 8.7   | 7.5   | 1.0 | 0.2 | 1.2 | 0.3 |
| 5535 | 026g07 | AV628551 | LCL043f06 |   |   | 10.2  | 11.0  | 9.8   | 1.1 | 0.2 | 1.2 | 0.3 |
| 5536 | 146h04 | AV627276 | LCL024c02 |   |   | 26.9  | 24.0  | 21.6  | 0.9 | 0.2 | 1.2 | 0.2 |
| 5537 | 112a12 | AV391447 | CM054e03  |   |   | 28.0  | 32.8  | 30.2  | 1.3 | 0.4 | 1.2 | 0.5 |
| 5538 | 167c05 | BP095968 | MXL050c06 |   |   | 7.5   | 11.9  | 10.4  | 1.7 | 0.5 | 1.2 | 0.2 |
| 5539 | 157d11 | BP086898 | MX019g07  |   |   | 5.3   | 7.0   | 6.2   | 1.4 | 0.5 | 1.2 | 0.4 |
| 5540 | 113f01 | AV397385 | CM068h04  |   |   | 10.0  | 13.6  | 11.9  | 1.4 | 0.2 | 1.2 | 0.2 |
| 5541 | 008h04 | AV389098 | CM078h09  |   |   | 15.8  | 18.6  | 16.2  | 1.3 | 0.4 | 1.2 | 0.2 |
| 5542 | 139f01 | AV623223 | LC060f07  |   |   | 7.7   | 5.4   | 4.8   | 0.7 | 0.2 | 1.2 | 0.3 |
| 5543 | 115g03 | AV391465 | CM090g08  |   |   | 5.7   | 7.1   | 6.3   | 1.3 | 0.3 | 1.2 | 0.2 |
| 5544 | 117b05 | AV632269 | HC006a10  |   |   | 6.7   | 6.2   | 5.8   | 1.0 | 0.3 | 1.2 | 0.3 |
| 5545 | 124b12 | AV640056 | HCL009e07 |   |   | 42.4  | 44.4  | 38.5  | 1.1 | 0.1 | 1.2 | 0.2 |
| 5546 | 036f11 | BP098575 | MXL095g03 |   |   | 8.8   | 9.1   | 7.7   | 1.1 | 0.2 | 1.2 | 0.2 |
| 5547 | 101a04 | AV383298 | CL01c12   |   |   | 6.9   | 6.6   | 6.3   | 1.0 | 0.1 | 1.2 | 0.7 |
| 5548 | 015e03 | AV641138 | HCL028d05 |   |   | 13.3  | 13.4  | 12.7  | 1.0 | 0.2 | 1.2 | 0.6 |
| 5549 | 138h07 | AV622707 | LC053c12  |   |   | 10.6  | 9.6   | 8.7   | 0.9 | 0.2 | 1.2 | 0.4 |
| 5550 | 026h06 | AV628649 | LCL045b01 |   |   | 6.4   | 7.9   | 7.2   | 1.2 | 0.3 | 1.2 | 0.5 |
| 5551 | 146e09 | AV627144 | LCL021g09 |   |   | 5.5   | 5.4   | 4.7   | 1.0 | 0.3 | 1.2 | 0.1 |
| 5552 | 139h09 | AV623462 | LC064b05  |   |   | 10.3  | 10.5  | 8.8   | 1.1 | 0.5 | 1.2 | 0.4 |
| 5553 | 105g06 | AV396948 | CL68h02   |   |   | 6.6   | 6.9   | 6.0   | 1.1 | 0.3 | 1.2 | 0.2 |
| 5554 | 114c03 | BP383680 | CM074g09  |   |   | 13.7  | 10.2  | 9.0   | 0.8 | 0.2 | 1.2 | 0.3 |
| 5555 | 129g03 | AV643005 | HCL062a04 |   |   | 12.9  | 16.0  | 14.0  | 1.2 | 0.1 | 1.2 | 0.2 |
| 5556 | 138d11 | AV622269 | LC047d06  |   |   | 16.3  | 14.1  | 12.5  | 0.9 | 0.3 | 1.2 | 0.4 |
| 5557 | 106a07 | AV396478 | CL74b04   |   |   | 13.7  | 13.0  | 11.4  | 1.0 | 0.1 | 1.2 | 0.1 |
| 5558 | 140e02 | BP383809 | LC069e04  |   |   | 45.5  | 44.1  | 37.9  | 1.0 | 0.4 | 1.2 | 0.1 |
| 5559 | 004d12 | AV386759 | CM008f04  |   |   | 12.2  | 11.3  | 9.9   | 0.9 | 0.1 | 1.2 | 0.4 |
| 5560 | 007b09 | AV391281 | CM052e07  |   |   | 24.3  | 24.9  | 22.5  | 1.0 | 0.1 | 1.2 | 0.4 |
| 5561 | 168e09 | BP09657  |           |   |   |       |       |       |     |     |     |     |

|      | A      | B        | C         | D | E | F     | G     | H     | I   | J   | K   | L   |
|------|--------|----------|-----------|---|---|-------|-------|-------|-----|-----|-----|-----|
| 5562 | 159c08 | BP087763 | MX043b05  |   |   | 29.3  | 29.8  | 26.2  | 1.0 | 0.3 | 1.2 | 0.4 |
| 5563 | 123g03 | AV639751 | HCL004d07 |   |   | 7.7   | 7.8   | 6.7   | 1.1 | 0.3 | 1.2 | 0.1 |
| 5564 | 139b12 | AV622894 | LC056b11  |   |   | 13.5  | 12.8  | 11.1  | 0.9 | 0.1 | 1.2 | 0.3 |
| 5565 | 112e09 | AV391973 | CM057g12  |   |   | 40.8  | 53.4  | 46.2  | 1.3 | 0.2 | 1.2 | 0.1 |
| 5566 | 001a12 | AV393416 | CL03f05   |   |   | 4.9   | 4.9   | 4.3   | 1.1 | 0.5 | 1.2 | 0.3 |
| 5567 | 134f04 | AV619435 | LC008d01  |   |   | 14.2  | 16.4  | 14.4  | 1.2 | 0.3 | 1.2 | 0.2 |
| 5568 | 101g01 | AV393898 | CL13d03   |   |   | 3.8   | 7.1   | 6.0   | 1.8 | 0.4 | 1.2 | 0.2 |
| 5569 | 019d10 | AV619778 | LC014f11  |   |   | 4.0   | 5.3   | 5.4   | 1.4 | 0.3 | 1.2 | 0.8 |
| 5570 | 157f04 | BP087092 | MX025a02  |   |   | 51.2  | 41.6  | 35.5  | 0.8 | 0.1 | 1.2 | 0.1 |
| 5571 | 021h08 | AV623088 | LC058g06  |   |   | 13.5  | 12.9  | 11.3  | 1.0 | 0.3 | 1.2 | 0.1 |
| 5572 | 139a03 | AV622761 | LC054b07  |   |   | 12.6  | 8.0   | 6.9   | 0.7 | 0.1 | 1.2 | 0.1 |
| 5573 | 133e07 | AV645091 | HCL098b03 |   |   | 20.4  | 23.5  | 20.9  | 1.2 | 0.2 | 1.2 | 0.3 |
| 5574 | 152a07 | AV629769 | LCL065g04 |   |   | 18.8  | 30.1  | 25.9  | 1.6 | 0.1 | 1.2 | 0.1 |
| 5575 | 106f01 | AV396465 | CM001g04  |   |   | 43.5  | 48.5  | 45.3  | 1.3 | 0.5 | 1.2 | 0.3 |
| 5576 | 126d12 | AV641279 | HCL030h10 |   |   | 770.3 | 760.2 | 630.7 | 1.0 | 0.2 | 1.2 | 0.3 |
| 5577 | 002b02 | AV394751 | CL30g05   |   |   | 4.6   | 10.2  | 10.7  | 2.7 | 1.9 | 1.2 | 0.8 |
| 5578 | 018d05 | AV644501 | HCL089f04 |   |   | 12.2  | 13.5  | 12.3  | 1.1 | 0.3 | 1.2 | 0.4 |
| 5579 | 107b02 | AV398603 | CM007b05  |   |   | 7.2   | 7.1   | 6.2   | 1.0 | 0.3 | 1.2 | 0.2 |
| 5580 | 120b12 | AV635892 | HC052c11  |   |   | 10.8  | 9.9   | 8.7   | 0.9 | 0.1 | 1.2 | 0.2 |
| 5581 | 036g05 | BP098633 | MXL096f02 |   |   | 13.7  | 15.0  | 15.2  | 1.1 | 0.1 | 1.2 | 0.4 |
| 5582 | 110f02 | AV389508 | CM037c09  |   |   | 10.2  | 8.6   | 8.3   | 0.8 | 0.1 | 1.2 | 0.7 |
| 5583 | 110d06 | AV389243 | CM035g06  |   |   | 3.7   | 4.2   | 3.6   | 1.2 | 0.4 | 1.2 | 0.1 |
| 5584 | 146f11 | BP383838 | LCL022d03 |   |   | 35.4  | 37.7  | 33.6  | 1.1 | 0.2 | 1.2 | 0.3 |
| 5585 | 162e03 | BP093751 | MXL013b03 |   |   | 6.6   | 7.2   | 6.4   | 1.1 | 0.2 | 1.2 | 0.2 |
| 5586 | 113f09 | AV387599 | CM069e05  |   |   | 4.0   | 4.5   | 3.9   | 1.2 | 0.4 | 1.2 | 0.2 |
| 5587 | 111c06 | AV390363 | CM045e02  |   |   | 103.5 | 121.8 | 105.1 | 1.2 | 0.3 | 1.2 | 0.1 |
| 5588 | 139g05 | AV623362 | LC062f08  |   |   | 4.8   | 6.7   | 5.9   | 1.4 | 0.8 | 1.2 | 0.7 |
| 5589 | 150b07 | AV628894 | LCL048f10 |   |   | 10.9  | 16.2  | 14.0  | 1.5 | 0.1 | 1.2 | 0.2 |
| 5590 | 168f09 | BP096655 | MXL062e05 |   |   | 12.8  | 12.8  | 11.0  | 1.1 | 0.6 | 1.2 | 0.2 |
| 5591 | 130e09 | AV643554 | HCL071f04 |   |   | 32.9  | 25.7  | 22.4  | 0.8 | 0.1 | 1.2 | 0.1 |
| 5592 | 112h03 | AV392348 | CM061a12  |   |   | 6.5   | 9.5   | 8.2   | 1.5 | 0.1 | 1.2 | 0.1 |
| 5593 | 013a06 | AV637793 | HC077e10  |   |   | 4.2   | 4.1   | 3.7   | 1.0 | 0.3 | 1.2 | 0.3 |
| 5594 | 143d01 | AV625681 | LC096d05  |   |   | 7.4   | 5.4   | 4.6   | 0.7 | 0.1 | 1.2 | 0.1 |
| 5595 | 152b03 | AV629806 | LCL066e03 |   |   | 31.9  | 32.4  | 28.6  | 1.0 | 0.2 | 1.2 | 0.1 |
| 5596 | 118h05 | BP383698 | HC032a07  |   |   | 65.8  | 59.8  | 56.5  | 0.9 | 0.2 | 1.2 | 0.4 |
| 5597 | 147d12 | AV627548 | LCL028d01 |   |   | 16.4  | 18.4  | 16.1  | 1.2 | 0.3 | 1.2 | 0.1 |
| 5598 | 104b08 | AV397786 | CL45d05   |   |   | 3.4   | 3.5   | 3.3   | 1.0 | 0.1 | 1.2 | 0.5 |
| 5599 | 017c02 | AV643012 | HCL062b11 |   |   | 10.8  | 12.5  | 11.2  | 1.2 | 0.2 | 1.2 | 0.2 |
| 5600 | 137f09 | BP383792 | LC040h01  |   |   | 9.1   | 13.3  | 11.5  | 1.5 | 0.4 | 1.2 | 0.2 |
| 5601 | 136g09 | AV620906 | LC028d08  |   |   | 5.6   | 7.1   | 6.2   | 1.3 | 0.3 | 1.2 | 0.3 |
| 5602 | 108b04 | AV387502 | CM016g12  |   |   | 14.9  | 15.2  | 13.2  | 1.0 | 0.1 | 1.2 | 0.1 |
| 5603 | 130b06 | AV643263 | HCL066e06 |   |   | 15.1  | 16.4  | 14.7  | 1.1 | 0.1 | 1.2 | 0.2 |
| 5604 | 149a05 | AV628293 | LCL039f10 |   |   | 10.4  | 8.2   | 7.1   | 0.8 | 0.2 | 1.2 | 0.1 |
| 5605 | 109f02 | AV387725 | CM027h05  |   |   | 36.9  | 32.4  | 33.5  | 0.9 | 0.4 | 1.2 | 0.9 |
| 5606 | 020h04 | AV621562 | LC037h01  |   |   | 8.2   | 7.5   | 6.8   | 0.9 | 0.1 | 1.2 | 0.3 |
| 5607 | 020f11 | AV621362 | LC035a05  |   |   | 8.2   | 8.7   | 7.5   | 1.1 | 0.2 | 1.2 | 0.1 |
| 5608 | 011f01 | AV635184 | HC043a03  |   |   | 10.0  | 13.2  | 11.7  | 1.4 | 0.5 | 1.2 | 0.5 |
| 5609 | 023d05 | AV625077 | LC087e08  |   |   | 150.3 | 140.6 | 141.0 | 0.9 | 0.0 | 1.2 | 0.6 |
| 5610 | 134h01 | AV619552 | LC009h06  |   |   | 8.8   | 6.5   | 5.7   | 0.8 | 0.4 | 1.2 | 0.4 |
| 5611 | 016h01 | AV642629 | HCL055a07 |   |   | 34.3  | 42.0  | 38.3  | 1.3 | 0.3 | 1.2 | 0.3 |
| 5612 | 005c10 | AV387867 | CM022c01  |   |   | 304.5 | 317.3 | 273.7 | 1.1 | 0.1 | 1.2 | 0.1 |
| 5613 | 019e01 | AV619954 | LC015e05  |   |   | 47.2  | 28.3  | 23.2  | 0.6 | 0.3 | 1.2 | 0.4 |
| 5614 | 026a10 | AV628066 | LCL036b09 |   |   | 13.8  | 10.7  | 11.3  | 0.8 | 0.1 | 1.2 | 0.7 |
| 5615 | 136a05 | AV620395 | LC021f04  |   |   | 9.0   | 7.6   | 6.8   | 0.9 | 0.2 | 1.2 | 0.5 |
| 5616 | 024c04 | AV626444 | LCL009b09 |   |   | 5.1   | 4.5   | 3.9   | 0.9 | 0.1 | 1.2 | 0.1 |
| 5617 | 105a07 | AV396114 | CL56g06   |   |   | 12.6  | 11.2  | 9.8   | 0.9 | 0.1 | 1.2 | 0.1 |
| 5618 | 121e06 | AV637229 | HC070d08  |   |   | 6.8   | 8.1   | 6.9   | 1.2 | 0.3 | 1.2 | 0.3 |
| 5619 | 029b10 | AV630660 | LCL082c05 |   |   | 4.3   | 3.0   | 2.6   | 0.7 | 0.4 | 1.2 | 0.5 |
| 5620 | 022d09 | AV623802 | LC068h02  |   |   | 11.9  | 12.3  | 11.1  | 1.1 | 0.2 | 1.2 | 0.3 |
| 5621 | 007a09 | AV391030 | CM049h01  |   |   | 5.8   | 6.8   | 6.0   | 1.2 | 0.1 | 1.2 | 0.3 |
| 5622 | 025a08 | AV627034 | LCL020b06 |   |   | 12.8  | 12.4  | 11.0  | 1.0 | 0.2 | 1.2 | 0.3 |
| 5623 | 019c05 | AV619898 | LC013a09  |   |   | 17.2  | 27.1  | 26.2  | 1.7 | 0.6 | 1.2 | 0.3 |
| 5624 | 113g02 | AV389311 | CM070b02  |   |   | 12.5  | 12.7  | 12.2  | 1.1 | 0.2 | 1.2 | 0.5 |
| 5625 | 169d01 | BP096925 | MXL067b10 |   |   | 11.2  | 9.8   | 8.6   | 0.9 | 0.2 | 1.2 | 0.2 |
| 5626 | 113a06 | AV392665 | CM063b07  |   |   | 65.5  | 90.9  | 77.6  | 1.4 | 0.2 | 1.2 | 0.2 |
| 5627 | 107c02 | AV386746 | CM008b02  |   |   | 3.9   | 5.4   | 4.7   | 1.4 | 0.1 | 1.2 | 0.1 |
| 5628 | 031c01 | BP086652 | MX013g03  |   |   | 118.7 | 87.6  | 76.0  | 0.8 | 0.1 | 1.2 | 0.0 |
| 5629 | 015h02 | AV641458 | HCL034a06 |   |   | 21.2  | 19.5  | 18.9  | 0.9 | 0.1 | 1.2 | 0.5 |
| 5630 | 116e11 | AV393231 | CM100b11  |   |   | 7.3   | 4.5   | 4.0   | 0.7 | 0.1 | 1.2 | 0.4 |
| 5631 | 115h03 | AV391667 | CM092f11  |   |   | 18.1  | 20.5  | 18.0  | 1.2 | 0.2 | 1.2 | 0.1 |
| 5632 | 029d01 | AV630789 | LCL084d02 |   |   | 1.6   | 1.2   | 1.1   | 0.8 | 0.4 | 1.2 | 0.3 |
| 5633 | 139f03 | AV623235 | LC060g11  |   |   | 13.6  | 13.1  | 13.1  | 1.0 | 0.2 | 1.2 | 0.5 |
| 5634 | 023c03 | AV624869 | LC083h01  |   |   | 7.4   | 7.0   | 6.3   | 1.0 | 0.2 | 1.2 | 0.3 |
| 5635 | 129b08 | AV642706 | HCL056d09 |   |   | 8.7   | 10.7  | 9.7   | 1.3 | 0.2 | 1.2 | 0.3 |
| 5636 | 014a12 | AV639725 | HCL003g11 |   |   | 10.7  | 14.5  | 12.7  | 1.4 | 0.8 | 1.2 | 0.5 |
| 5637 | 010f06 | AV633217 | HC018b09  |   |   | 99.5  | 128.1 | 111.7 | 1.3 | 0.1 | 1.2 | 0.1 |
| 5638 | 001e05 | AV393980 | CL15a05   |   |   | 5.4   | 6.9   | 6.5   | 1.4 | 0.6 | 1.2 | 0.4 |
| 5639 | 021f05 | AV622640 | LC052c11  |   |   | 13.2  | 15.0  | 13.4  | 1.2 | 0.2 | 1.2 | 0.3 |
| 5640 | 112a11 | AV391439 | CM054e01  |   |   | 14.8  | 11.6  | 10.2  | 0.9 | 0.3 | 1.2 | 0.1 |
| 5641 | 024d12 | AV626582 | LCL011h02 |   |   | 7.1   | 6.6   | 5.8   | 0.9 | 0.3 | 1.2 | 0.3 |
| 5642 | 111a07 | AV390145 | CM042f08  |   |   | 11.7  | 16.1  | 14.9  | 1.4 | 0.1 | 1.2 | 0.4 |
| 5643 | 032f02 | BP093484 | MXL009a08 |   |   | 13.8  | 10.5  | 12.0  | 0.8 | 0.1 | 1.2 | 0.7 |
| 5644 | 119a06 | AV634502 | HC034c05  |   |   | 9.4   | 14.8  | 12.8  | 1.7 | 0.7 | 1.2 | 0.1 |
| 5645 | 165g03 | BP095333 | MXL040b02 |   |   | 11.0  | 6.8   | 7.3   | 0.6 | 0.2 | 1.2 | 0.8 |
| 5646 | 026a05 | AV628006 | LCL035c01 |   |   | 31.8  | 24.4  | 21.7  | 0.8 | 0.2 | 1.1 | 0.3 |
| 5647 | 001c08 | AV393503 | CL08g05   |   |   | 4.9   | 5.5   | 4.9   | 1.1 | 0.2 | 1.1 | 0.2 |
| 5648 | 101f04 | AV393812 | CL12a02   |   |   | 8.6   | 7.4   | 6.5   | 0.9 | 0.3 | 1.1 | 0.2 |
| 5649 | 130c01 | AV643309 | HCL067d02 |   |   | 14.8  | 16.2  | 14.2  | 1.1 | 0.2 | 1.1 | 0.1 |
| 5650 | 159e07 | BP087832 | MX044e12  |   |   | 7.2   | 9.7   | 8.8   | 1.3 | 0.3 | 1.1 | 0.5 |
| 5651 | 028d05 | AV629900 | LCL068f03 |   |   | 15.3  | 27.0  | 24.0  | 1.8 | 0.4 | 1.1 | 0.1 |
| 5652 | 019c12 | AV619862 | LC013e08  |   |   | 151.8 | 132.1 | 120.1 | 0.9 | 0.1 | 1.1 | 0.4 |
| 5653 | 145b03 | AV626521 | LCL010e08 |   |   | 11.0  | 8.7   | 7.6   | 0.8 | 0.2 | 1.1 | 0.2 |
| 5654 | 004c05 | AV386665 | CM004g04  |   |   | 30.1  | 38.4  | 38.0  | 1.3 | 0.1 | 1.1 | 0.6 |
| 5655 | 006h03 | AV390600 | CM047a10  |   |   | 9.6   | 10.7  | 9.4   | 1.2 | 0.3 | 1.1 | 0.1 |
| 5656 | 143d11 | AV625710 | LC096g06  |   |   | 16.3  | 16.5  | 14.8  | 1.0 | 0.1 | 1.1 | 0.3 |
| 5657 | 146c11 | AV627068 | LCL020e12 |   |   | 9.3   | 8.5   | 7.5   | 0.9 | 0.0 | 1.1 | 0.3 |
| 5658 | 120f06 | AV636245 | HC057a03  |   |   | 6.3   | 6.1   | 5.6   | 1.0 | 0.3 | 1.1 | 0.5 |
| 5659 | 111h09 | AV391270 | CM052d09  |   |   | 34.5  | 47.8  | 42.1  | 1.4 | 0.3 | 1.1 | 0.2 |
| 5660 | 144c02 | AV626183 | LCL003g07 |   |   | 28.9  | 27.9  | 24.4  | 1.0 | 0.1 | 1.1 | 0.1 |
| 5661 | 149f04 | AV628550 | LCL043f04 |   |   | 7.9   | 9.0   | 8.0   | 1.2 | 0.3 | 1.1 | 0.2 |
| 5662 | 123d05 | AV639545 | HC100g08  |   |   | 9.7   | 8.9   | 7.9   | 0.9 | 0.3 | 1.1 | 0.4 |
| 5663 | 013e03 | AV638801 | HC091a03  |   |   | 9.0   | 10.2  | 8.8   | 1.2 | 0.4 | 1.1 | 0.2 |
| 5664 | 144e05 | AV626270 | LCL005f01 |   |   | 33.6  | 59.5  | 56.1  | 1.8 | 0.6 | 1.1 | 0.3 |
| 5665 | 102a05 | AV394098 | CL17f11   |   |   | 2.2   | 2.9   | 2.6   | 1.3 | 0.1 | 1.1 | 0.3 |
| 5666 | 109g11 | AV388482 | CM029h04  |   |   | 51.2  | 65.3  | 58.7  | 1.3 | 0.2 | 1.1 | 0.4 |
| 5667 | 002f06 | AV395598 | CL44e11   |   |   | 8.9   | 13.2  | 11.6  | 1.5 | 0.3 | 1.1 | 0.2 |
| 5668 | 171h01 | BP098113 | MXL087c   |   |   |       |       |       |     |     |     |     |



|      | A      | B        | C         | D | E | F     | G     | H     | I   | J   | K   | L   |
|------|--------|----------|-----------|---|---|-------|-------|-------|-----|-----|-----|-----|
| 5669 | 142d03 | AV625119 | LC088b05  |   |   | 27.1  | 32.8  | 29.6  | 1.2 | 0.1 | 1.1 | 0.3 |
| 5670 | 133a03 | AV644874 | HCL094h12 |   |   | 8.3   | 9.7   | 8.5   | 1.2 | 0.1 | 1.1 | 0.2 |
| 5671 | 111e12 | AV390890 | CM048f11  |   |   | 7.2   | 8.1   | 7.2   | 1.2 | 0.3 | 1.1 | 0.2 |
| 5672 | 101g04 | AV393876 | CL14a06   |   |   | 3.5   | 4.0   | 3.3   | 1.1 | 0.3 | 1.1 | 0.3 |
| 5673 | 165b08 | BP095109 | MXL035h12 |   |   | 63.4  | 87.3  | 78.8  | 1.4 | 0.1 | 1.1 | 0.2 |
| 5674 | 029h03 | AV631157 | LCL089f04 |   |   | 3.9   | 4.4   | 4.1   | 1.1 | 0.2 | 1.1 | 0.3 |
| 5675 | 133h10 | AV645290 | HCL100f11 |   |   | 13.5  | 12.9  | 11.5  | 1.0 | 0.2 | 1.1 | 0.4 |
| 5676 | 022h03 | AV624322 | LC076b04  |   |   | 74.5  | 53.9  | 48.5  | 0.7 | 0.1 | 1.1 | 0.5 |
| 5677 | 130g11 | AV643712 | HCL074f06 |   |   | 19.8  | 26.0  | 23.2  | 1.4 | 0.4 | 1.1 | 0.3 |
| 5678 | 018c11 | AV644419 | HCL088b08 |   |   | 4.1   | 9.2   | 8.2   | 2.3 | 0.2 | 1.1 | 0.2 |
| 5679 | 124f05 | AV640210 | HCL012b12 |   |   | 37.6  | 27.3  | 26.7  | 0.7 | 0.2 | 1.1 | 0.6 |
| 5680 | 168c10 | BP096396 | MXL058b02 |   |   | 20.1  | 19.8  | 17.6  | 1.0 | 0.3 | 1.1 | 0.4 |
| 5681 | 120b07 | AV635809 | HC051c06  |   |   | 12.1  | 14.7  | 13.0  | 1.2 | 0.3 | 1.1 | 0.5 |
| 5682 | 026g02 | AV628520 | LCL043b10 |   |   | 16.2  | 11.9  | 10.6  | 0.8 | 0.2 | 1.1 | 0.2 |
| 5683 | 140c08 | AV623730 | LC067h05  |   |   | 11.0  | 9.0   | 8.6   | 0.8 | 0.1 | 1.1 | 0.4 |
| 5684 | 129c12 | AV642799 | HCL058c05 |   |   | 30.0  | 32.6  | 28.7  | 1.1 | 0.1 | 1.1 | 0.2 |
| 5685 | 153h01 | AV630674 | LCL082e06 |   |   | 47.3  | 41.6  | 36.1  | 0.9 | 0.2 | 1.1 | 0.2 |
| 5686 | 122e06 | AV638495 | HC087b01  |   |   | 8.8   | 8.1   | 7.0   | 0.9 | 0.2 | 1.1 | 0.3 |
| 5687 | 118e09 | AV633912 | HC026g12  |   |   | 45.3  | 44.7  | 40.2  | 1.0 | 0.1 | 1.1 | 0.2 |
| 5688 | 146h09 | AV627296 | LCL024e09 |   |   | 24.4  | 31.2  | 27.0  | 1.3 | 0.5 | 1.1 | 0.4 |
| 5689 | 121f08 | AV637359 | HC072b06  |   |   | 145.1 | 123.9 | 112.2 | 0.9 | 0.4 | 1.1 | 0.2 |
| 5690 | 159f04 | BP087943 | MX047e06  |   |   | 9.1   | 10.9  | 9.8   | 1.2 | 0.2 | 1.1 | 0.3 |
| 5691 | 102d04 | AV394246 | CL22a08   |   |   | 12.2  | 13.5  | 12.4  | 1.1 | 0.2 | 1.1 | 0.3 |
| 5692 | 032e12 | BP093473 | MXL008h04 |   |   | 6.2   | 6.4   | 5.7   | 1.1 | 0.2 | 1.1 | 0.1 |
| 5693 | 014g03 | AV640363 | HCL015a01 |   |   | 9.5   | 12.0  | 11.0  | 1.3 | 0.3 | 1.1 | 0.3 |
| 5694 | 152h03 | AV630220 | LCL075f01 |   |   | 5.2   | 4.6   | 4.0   | 0.9 | 0.1 | 1.1 | 0.1 |
| 5695 | 115h01 | AV391663 | CM092c12  |   |   | 4.9   | 6.2   | 5.5   | 1.3 | 0.5 | 1.1 | 0.3 |
| 5696 | 148b05 | AV627851 | LCL032h09 |   |   | 11.9  | 10.8  | 9.6   | 0.9 | 0.2 | 1.1 | 0.2 |
| 5697 | 011b03 | AV634302 | HC031f08  |   |   | 4.4   | 3.5   | 3.1   | 0.8 | 0.1 | 1.1 | 0.2 |
| 5698 | 005b03 | AV387336 | CM019f11  |   |   | 22.3  | 28.7  | 25.4  | 1.4 | 0.5 | 1.1 | 0.3 |
| 5699 | 166c04 | BP095538 | MXL043e03 |   |   | 189.1 | 321.7 | 313.3 | 1.7 | 0.3 | 1.1 | 0.5 |
| 5700 | 136c05 | AV620606 | LC024c09  |   |   | 11.1  | 8.3   | 7.4   | 0.8 | 0.4 | 1.1 | 0.6 |
| 5701 | 166f12 | BP095735 | MXL046e12 |   |   | 12.6  | 13.1  | 11.3  | 1.2 | 0.7 | 1.1 | 0.2 |
| 5702 | 130a10 | AV643235 | HCL066b03 |   |   | 22.0  | 23.6  | 20.9  | 1.1 | 0.1 | 1.1 | 0.2 |
| 5703 | 002a02 | AV394800 | CL28a01   |   |   | 16.1  | 29.9  | 31.2  | 1.9 | 0.4 | 1.1 | 0.5 |
| 5704 | 116f08 | AV397968 | CS001b12  |   |   | 10.1  | 5.8   | 5.6   | 0.6 | 0.2 | 1.1 | 0.5 |
| 5705 | 018a09 | AV644121 | HCL082c10 |   |   | 5.5   | 9.2   | 8.5   | 1.8 | 0.6 | 1.1 | 0.4 |
| 5706 | 027a12 | AV628811 | LCL047d12 |   |   | 7.7   | 5.6   | 6.4   | 0.7 | 0.1 | 1.1 | 0.7 |
| 5707 | 030f05 | AV631831 | LCL100e08 |   |   | 13.4  | 12.3  | 11.2  | 1.0 | 0.2 | 1.1 | 0.3 |
| 5708 | 011g09 | AV635502 | HC047b05  |   |   | 8.2   | 20.1  | 16.2  | 2.3 | 0.9 | 1.1 | 0.4 |
| 5709 | 017g07 | AV643668 | HCL073h01 |   |   | 8.4   | 9.7   | 8.7   | 1.2 | 0.1 | 1.1 | 0.4 |
| 5710 | 003d02 | AV396368 | CL60c11   |   |   | 2.4   | 3.6   | 3.2   | 1.6 | 0.8 | 1.1 | 0.3 |
| 5711 | 110e10 | AV389473 | CM037a07  |   |   | 8.7   | 12.2  | 10.6  | 1.4 | 0.0 | 1.1 | 0.2 |
| 5712 | 139h03 | AV623422 | LC063e11  |   |   | 25.3  | 23.2  | 21.3  | 0.9 | 0.1 | 1.1 | 0.4 |
| 5713 | 140b09 | AV623661 | LC066h09  |   |   | 10.9  | 12.1  | 11.6  | 1.2 | 0.7 | 1.1 | 0.5 |
| 5714 | 137a12 | AV621210 | LC032g05  |   |   | 32.1  | 25.6  | 22.7  | 0.8 | 0.1 | 1.1 | 0.1 |
| 5715 | 001f04 | AV394043 | CL18b06   |   |   | 3.0   | 3.5   | 3.2   | 1.3 | 0.4 | 1.1 | 0.3 |
| 5716 | 155h01 | AV631631 | LCL097c07 |   |   | 6.9   | 7.2   | 7.7   | 0.9 | 0.4 | 1.1 | 1.0 |
| 5717 | 028b09 | AV629707 | LCL064b06 |   |   | 18.5  | 16.5  | 15.2  | 0.9 | 0.2 | 1.1 | 0.4 |
| 5718 | 112g08 | AV392306 | CM060f11  |   |   | 14.3  | 13.6  | 11.8  | 1.0 | 0.1 | 1.1 | 0.2 |
| 5719 | 141g09 | AV624750 | LC082b04  |   |   | 36.8  | 36.5  | 31.9  | 1.0 | 0.2 | 1.1 | 0.0 |
| 5720 | 007d02 | AV391479 | CM054h03  |   |   | 6.9   | 10.6  | 9.6   | 2.1 | 1.5 | 1.1 | 0.3 |
| 5721 | 101c02 | AV393403 | CL03e06   |   |   | 38.3  | 58.1  | 50.3  | 1.5 | 0.4 | 1.1 | 0.1 |
| 5722 | 124f03 | AV640204 | HCL012b03 |   |   | 11.7  | 12.6  | 11.3  | 1.1 | 0.3 | 1.1 | 0.4 |
| 5723 | 134d06 | AV619217 | LC005c08  |   |   | 9.3   | 14.3  | 12.5  | 1.5 | 0.2 | 1.1 | 0.1 |
| 5724 | 011d09 | AV634864 | HC039a01  |   |   | 190.6 | 220.3 | 193.4 | 1.2 | 0.1 | 1.1 | 0.2 |
| 5725 | 114g06 | AV390535 | CM080f03  |   |   | 8.3   | 7.2   | 7.5   | 0.9 | 0.1 | 1.1 | 0.5 |
| 5726 | 135d02 | AV619809 | LC014h07  |   |   | 34.1  | 19.1  | 19.1  | 0.5 | 0.3 | 1.1 | 0.9 |
| 5727 | 018a12 | AV644132 | HCL082e10 |   |   | 28.6  | 19.3  | 23.2  | 0.7 | 0.2 | 1.1 | 0.7 |
| 5728 | 148d01 | AV627972 | LCL034f10 |   |   | 12.7  | 14.0  | 12.3  | 1.1 | 0.2 | 1.1 | 0.0 |
| 5729 | 125h04 | AV640832 | HCL023b02 |   |   | 11.4  | 8.4   | 7.4   | 0.7 | 0.1 | 1.1 | 0.2 |
| 5730 | 014d02 | AV639944 | HCL007f12 |   |   | 11.8  | 14.0  | 15.1  | 1.2 | 0.2 | 1.1 | 0.5 |
| 5731 | 149b10 | AV628384 | LCL041a01 |   |   | 13.9  | 14.6  | 13.6  | 1.1 | 0.1 | 1.1 | 0.3 |
| 5732 | 137h02 | AV621920 | LC042f06  |   |   | 19.0  | 17.3  | 15.3  | 0.9 | 0.3 | 1.1 | 0.2 |
| 5733 | 020h03 | AV621552 | LC037f12  |   |   | 32.2  | 36.8  | 33.6  | 1.2 | 0.2 | 1.1 | 0.3 |
| 5734 | 108d12 | AV387351 | CM019d11  |   |   | 17.7  | 17.5  | 16.3  | 1.0 | 0.1 | 1.1 | 0.4 |
| 5735 | 141g04 | AV624716 | LC081f04  |   |   | 19.3  | 18.1  | 16.0  | 0.9 | 0.0 | 1.1 | 0.1 |
| 5736 | 134c01 | AV619098 | LC003g03  |   |   | 11.5  | 10.0  | 9.3   | 0.9 | 0.1 | 1.1 | 0.3 |
| 5737 | 116g11 | AV631931 | HC001h01  |   |   | 44.6  | 52.2  | 45.6  | 1.2 | 0.2 | 1.1 | 0.1 |
| 5738 | 021c01 | AV622099 | LC045a05  |   |   | 401.0 | 319.7 | 282.6 | 0.8 | 0.0 | 1.1 | 0.1 |
| 5739 | 143d05 | AV625692 | LC096e06  |   |   | 7.5   | 7.1   | 6.6   | 1.0 | 0.2 | 1.1 | 0.2 |
| 5740 | 111f05 | AV390938 | CM049b04  |   |   | 4.9   | 5.7   | 5.1   | 1.2 | 0.0 | 1.1 | 0.2 |
| 5741 | 120h04 | BP383707 | HC060b08  |   |   | 10.4  | 7.6   | 6.7   | 0.8 | 0.1 | 1.1 | 0.1 |
| 5742 | 105f10 | AV396701 | CL67f03   |   |   | 9.0   | 7.6   | 6.7   | 0.9 | 0.1 | 1.1 | 0.1 |
| 5743 | 103a06 | AV395038 | CL31a05   |   |   | 13.8  | 19.2  | 17.5  | 1.4 | 0.2 | 1.1 | 0.6 |
| 5744 | 171h06 | BP098148 | MXL088b08 |   |   | 20.8  | 39.5  | 31.8  | 2.1 | 1.7 | 1.1 | 0.6 |
| 5745 | 127b08 | AV641669 | HCL038d09 |   |   | 10.8  | 13.0  | 11.5  | 1.3 | 0.5 | 1.1 | 0.2 |
| 5746 | 002e12 | AV395472 | CL42h04   |   |   | 3.3   | 4.2   | 4.1   | 1.3 | 1.2 | 1.1 | 1.0 |
| 5747 | 148a04 | AV627780 | LCL031h08 |   |   | 24.1  | 19.1  | 17.0  | 0.8 | 0.1 | 1.1 | 0.1 |
| 5748 | 030b09 | AV631454 | LCL094c08 |   |   | 7.0   | 4.9   | 4.5   | 0.7 | 0.2 | 1.1 | 0.3 |
| 5749 | 172d01 | BP098340 | MXL091g08 |   |   | 6.9   | 8.2   | 7.5   | 1.2 | 0.1 | 1.1 | 0.3 |
| 5750 | 125h10 | AV640859 | HCL023f04 |   |   | 7.2   | 7.6   | 6.7   | 1.1 | 0.2 | 1.1 | 0.2 |
| 5751 | 014a01 | AV639662 | HCL002f06 |   |   | 9.8   | 13.6  | 12.0  | 1.4 | 0.4 | 1.1 | 0.3 |
| 5752 | 032a02 | BP087566 | MX037f02  |   |   | 12.3  | 7.6   | 6.9   | 0.6 | 0.1 | 1.1 | 0.3 |
| 5753 | 101a12 | AV393354 | CL01g01   |   |   | 5.4   | 8.6   | 8.2   | 1.8 | 0.5 | 1.1 | 0.6 |
| 5754 | 152b07 | AV629820 | LCL066g07 |   |   | 15.3  | 15.1  | 13.3  | 1.0 | 0.1 | 1.1 | 0.1 |
| 5755 | 115e04 | AV391084 | CM088g03  |   |   | 15.1  | 18.7  | 16.1  | 1.3 | 0.6 | 1.1 | 0.2 |
| 5756 | 008f12 | AV389438 | CM075d05  |   |   | 6.4   | 4.0   | 4.0   | 0.7 | 0.2 | 1.1 | 0.6 |
| 5757 | 134a06 | AV618913 | LC001c07  |   |   | 7.2   | 6.3   | 5.7   | 0.9 | 0.1 | 1.1 | 0.4 |
| 5758 | 134f02 | AV619408 | LC007h12  |   |   | 12.5  | 14.8  | 13.0  | 1.2 | 0.2 | 1.1 | 0.1 |
| 5759 | 140e09 | BP383810 | LC070c12  |   |   | 12.0  | 10.8  | 9.9   | 0.9 | 0.2 | 1.1 | 0.3 |
| 5760 | 021b12 | AV622092 | LC044h06  |   |   | 496.5 | 439.5 | 398.1 | 0.9 | 0.1 | 1.1 | 0.2 |
| 5761 | 147c12 | AV627492 | LCL027e11 |   |   | 14.4  | 11.4  | 10.0  | 0.8 | 0.2 | 1.1 | 0.2 |
| 5762 | 118d05 | AV633719 | HC024d07  |   |   | 63.9  | 71.0  | 62.7  | 1.1 | 0.1 | 1.1 | 0.2 |
| 5763 | 116d09 | AV393258 | CM099c06  |   |   | 61.4  | 62.7  | 56.5  | 1.0 | 0.1 | 1.1 | 0.3 |
| 5764 | 007h11 | AV392544 | CM062d03  |   |   | 7.5   | 8.6   | 8.0   | 1.1 | 0.3 | 1.1 | 0.7 |
| 5765 | 007f12 | AV392189 | CM058h08  |   |   | 5.6   | 6.5   | 5.9   | 1.2 | 0.4 | 1.1 | 0.3 |
| 5766 | 144b10 | AV626170 | LCL003e08 |   |   | 10.2  | 13.0  | 12.4  | 1.3 | 0.3 | 1.1 | 0.6 |
| 5767 | 108e08 | AV397450 | CM020c02  |   |   | 56.4  | 39.6  | 36.3  | 0.7 | 0.1 | 1.1 | 0.3 |
| 5768 | 013e10 | AV638891 | HC092b07  |   |   | 18.9  | 23.1  | 20.4  | 1.5 | 0.8 | 1.1 | 0.1 |
| 5769 | 161d01 | BP093085 | MXL003b09 |   |   | 20.9  | 20.0  | 19.9  | 1.0 | 0.2 | 1.1 | 0.5 |
| 5770 | 146c02 | AV627035 | LCL020b07 |   |   | 5.1   | 4.2   | 4.2   | 0.9 | 0.3 | 1.1 | 0.5 |
| 5771 | 025f07 | AV627677 | LCL030d08 |   |   | 56.9  | 41.1  | 40.5  | 0.7 | 0.1 | 1.1 | 0.6 |
| 5772 | 012h01 | AV637521 | HC074b06  |   |   | 9.3   | 8.6   | 7.6   | 1.0 | 0.4 | 1.1 | 0.1 |
| 5773 | 123c09 | AV639470 | HC099g07  |   |   | 13.2  | 10.7  | 10.1  | 0.8 | 0.1 | 1.1 | 0.4 |
| 5774 | 110h03 | AV389895 | CM040d06  |   |   | 9.3   | 13.4  | 11.9  | 1.4 | 0.1 | 1.1 | 0.1 |
| 5775 | 146g03 | AV627    |           |   |   |       |       |       |     |     |     |     |

|      | A      | B        | C         | D | E | F     | G     | H     | I   | J   | K   | L   |
|------|--------|----------|-----------|---|---|-------|-------|-------|-----|-----|-----|-----|
| 5776 | 157f06 | BP087094 | MX025a07  |   |   | 61.0  | 56.3  | 49.4  | 0.9 | 0.1 | 1.1 | 0.2 |
| 5777 | 109h05 | AV388633 | CM030g09  |   |   | 13.5  | 14.4  | 12.7  | 1.1 | 0.4 | 1.1 | 0.2 |
| 5778 | 111h03 | AV391205 | CM051g03  |   |   | 8.3   | 8.2   | 7.3   | 1.0 | 0.1 | 1.1 | 0.2 |
| 5779 | 033d10 | BP094376 | MXL022c01 |   |   | 4.3   | 4.2   | 3.9   | 1.0 | 0.3 | 1.1 | 0.3 |
| 5780 | 022b12 | AV623508 | LC064g12  |   |   | 14.3  | 16.0  | 14.2  | 1.2 | 0.4 | 1.1 | 0.1 |
| 5781 | 145h11 | AV626922 | LCL018b06 |   |   | 18.5  | 32.9  | 29.0  | 2.0 | 0.6 | 1.1 | 0.1 |
| 5782 | 120c11 | AV635943 | HC053a12  |   |   | 11.7  | 13.6  | 12.2  | 1.2 | 0.1 | 1.1 | 0.3 |
| 5783 | 117a03 | AV632079 | HC003f05  |   |   | 6.0   | 7.9   | 7.0   | 1.5 | 0.7 | 1.1 | 0.1 |
| 5784 | 138h06 | AV622692 | LC053b05  |   |   | 40.2  | 28.7  | 29.7  | 0.7 | 0.2 | 1.1 | 0.7 |
| 5785 | 170e04 | BP097440 | MXL075g02 |   |   | 9.5   | 9.1   | 8.0   | 1.0 | 0.5 | 1.1 | 0.2 |
| 5786 | 021e02 | AV622391 | LC049a11  |   |   | 48.2  | 46.4  | 40.3  | 0.9 | 0.1 | 1.1 | 0.4 |
| 5787 | 025c12 | AV627265 | LCL024a05 |   |   | 6.8   | 7.1   | 6.7   | 1.0 | 0.1 | 1.1 | 0.5 |
| 5788 | 005g01 | AV388024 | CM028c04  |   |   | 9.6   | 10.4  | 9.2   | 1.2 | 0.4 | 1.1 | 0.0 |
| 5789 | 026c04 | AV628222 | LCL038f08 |   |   | 29.9  | 17.5  | 16.5  | 0.6 | 0.1 | 1.1 | 0.4 |
| 5790 | 131c09 | AV644022 | HCL080d06 |   |   | 29.6  | 30.2  | 27.1  | 1.0 | 0.2 | 1.1 | 0.1 |
| 5791 | 130g08 | AV643692 | HCL074c07 |   |   | 14.1  | 17.4  | 15.2  | 1.3 | 0.3 | 1.1 | 0.1 |
| 5792 | 136c08 | AV620623 | LC024e07  |   |   | 38.3  | 25.7  | 24.2  | 0.7 | 0.1 | 1.1 | 0.3 |
| 5793 | 138d02 | AV622221 | LC046g05  |   |   | 16.9  | 11.3  | 10.2  | 0.7 | 0.2 | 1.1 | 0.4 |
| 5794 | 112d05 | AV391805 | CM056d06  |   |   | 9.5   | 12.2  | 11.1  | 1.3 | 0.3 | 1.1 | 0.2 |
| 5795 | 110a07 | AV388789 | CM032d06  |   |   | 4.5   | 5.7   | 5.0   | 1.3 | 0.2 | 1.1 | 0.2 |
| 5796 | 140b08 | AV623655 | LC066g12  |   |   | 12.9  | 11.3  | 10.3  | 0.9 | 0.1 | 1.1 | 0.2 |
| 5797 | 127b09 | AV641672 | HCL038e02 |   |   | 16.3  | 19.4  | 17.6  | 1.2 | 0.3 | 1.1 | 0.4 |
| 5798 | 120b02 | AV635746 | HC050d05  |   |   | 43.4  | 48.1  | 46.0  | 1.1 | 0.2 | 1.1 | 0.3 |
| 5799 | 112a05 | AV391380 | CM053f06  |   |   | 9.6   | 10.7  | 10.3  | 1.1 | 0.2 | 1.1 | 0.4 |
| 5800 | 154g03 | AV631110 | LCL089a02 |   |   | 14.1  | 13.8  | 12.1  | 1.0 | 0.1 | 1.1 | 0.1 |
| 5801 | 031c07 | BP086682 | MX014c10  |   |   | 9.7   | 8.3   | 7.3   | 0.8 | 0.1 | 1.1 | 0.2 |
| 5802 | 034b08 | BP095367 | MXL040g01 |   |   | 6.0   | 9.2   | 8.0   | 1.5 | 0.3 | 1.1 | 0.2 |
| 5803 | 154g10 | AV631156 | LCL089f03 |   |   | 8.8   | 10.6  | 9.7   | 1.2 | 0.6 | 1.1 | 0.7 |
| 5804 | 156f04 | BP086233 | MX004f12  |   |   | 7.9   | 8.8   | 7.6   | 1.1 | 0.5 | 1.1 | 0.3 |
| 5805 | 030g11 | BP086198 | MX003h03  |   |   | 12.0  | 10.8  | 9.7   | 0.9 | 0.2 | 1.1 | 0.3 |
| 5806 | 016d01 | AV642041 | HCL044d02 |   |   | 2.9   | 4.4   | 4.0   | 1.6 | 0.5 | 1.1 | 0.2 |
| 5807 | 002g12 | AV397751 | CL49h07   |   |   | 5.8   | 7.6   | 6.6   | 1.2 | 0.5 | 1.1 | 0.6 |
| 5808 | 035f12 | BP097307 | MXL073d08 |   |   | 26.3  | 32.7  | 27.8  | 1.2 | 0.2 | 1.1 | 0.3 |
| 5809 | 031a06 | BP086391 | MX007g11  |   |   | 10.4  | 8.8   | 8.2   | 0.9 | 0.2 | 1.1 | 0.3 |
| 5810 | 110d12 | AV389349 | CM036b01  |   |   | 37.3  | 40.8  | 36.9  | 1.1 | 0.1 | 1.1 | 0.2 |
| 5811 | 129c02 | AV642751 | HCL057b11 |   |   | 32.7  | 33.2  | 30.9  | 1.0 | 0.0 | 1.1 | 0.4 |
| 5812 | 110d01 | AV389192 | CM035e04  |   |   | 7.7   | 12.7  | 11.3  | 1.7 | 0.2 | 1.1 | 0.1 |
| 5813 | 023b05 | AV624701 | LC081d08  |   |   | 36.7  | 35.4  | 31.2  | 1.0 | 0.3 | 1.1 | 0.1 |
| 5814 | 139b09 | AV622873 | LC055h03  |   |   | 2.9   | 2.9   | 2.6   | 1.0 | 0.4 | 1.1 | 0.3 |
| 5815 | 003a03 | AV395884 | CL52g04   |   |   | 2.8   | 3.0   | 2.8   | 1.2 | 0.6 | 1.1 | 0.4 |
| 5816 | 114b11 | AV388978 | CM074a11  |   |   | 29.1  | 24.6  | 21.9  | 0.9 | 0.1 | 1.1 | 0.1 |
| 5817 | 110f07 | AV389661 | CM038h04  |   |   | 55.5  | 54.7  | 49.0  | 1.0 | 0.1 | 1.1 | 0.1 |
| 5818 | 124g11 | AV640286 | HCL013f12 |   |   | 18.8  | 20.3  | 18.0  | 1.1 | 0.1 | 1.1 | 0.1 |
| 5819 | 019c03 | AV619758 | LC012g02  |   |   | 5.9   | 5.4   | 4.8   | 1.0 | 0.3 | 1.1 | 0.1 |
| 5820 | 154f10 | AV631077 | LCL088d11 |   |   | 8.4   | 7.2   | 8.1   | 0.9 | 0.2 | 1.1 | 0.8 |
| 5821 | 146a01 | AV626932 | LCL018c12 |   |   | 12.7  | 9.0   | 8.4   | 0.7 | 0.1 | 1.1 | 0.3 |
| 5822 | 111f04 | AV390933 | CM049b02  |   |   | 16.3  | 11.2  | 10.7  | 0.8 | 0.3 | 1.1 | 0.5 |
| 5823 | 006b04 | AV389152 | CM035c09  |   |   | 4.4   | 4.8   | 4.4   | 1.2 | 0.5 | 1.1 | 0.3 |
| 5824 | 142h03 | AV625491 | LC093f01  |   |   | 30.5  | 24.8  | 23.8  | 0.8 | 0.1 | 1.1 | 0.3 |
| 5825 | 153a06 | BP098832 | MXL099h08 |   |   | 18.3  | 13.7  | 12.9  | 0.8 | 0.2 | 1.1 | 0.5 |
| 5826 | 120f12 | AV636334 | HC058b03  |   |   | 6.0   | 5.0   | 4.5   | 0.9 | 0.2 | 1.1 | 0.3 |
| 5827 | 127h09 | AV642061 | HCL044h07 |   |   | 5.2   | 5.9   | 5.2   | 1.1 | 0.1 | 1.1 | 0.1 |
| 5828 | 133c01 | AV644989 | HCL096f03 |   |   | 7.8   | 6.7   | 6.1   | 0.9 | 0.4 | 1.1 | 0.4 |
| 5829 | 131f01 | AV644194 | HCL083f09 |   |   | 15.7  | 13.7  | 12.4  | 0.9 | 0.3 | 1.1 | 0.2 |
| 5830 | 148h06 | AV628233 | LCL038g10 |   |   | 13.3  | 14.1  | 12.2  | 1.0 | 0.3 | 1.1 | 0.3 |
| 5831 | 145g03 | AV626828 | LCL016b05 |   |   | 41.7  | 39.4  | 38.7  | 1.0 | 0.3 | 1.1 | 0.5 |
| 5832 | 103d04 | AV395096 | CL35h08   |   |   | 16.9  | 14.5  | 13.1  | 0.9 | 0.1 | 1.1 | 0.1 |
| 5833 | 152h11 | AV630254 | LCL076b09 |   |   | 5.7   | 5.7   | 5.6   | 1.1 | 0.4 | 1.1 | 0.6 |
| 5834 | 103h10 | AV395519 | CL43c02   |   |   | 5.0   | 5.2   | 4.7   | 1.1 | 0.1 | 1.1 | 0.2 |
| 5835 | 033b05 | BP094110 | MXL018c10 |   |   | 35.0  | 32.9  | 31.4  | 1.0 | 0.2 | 1.1 | 0.3 |
| 5836 | 113a01 | AV392612 | CM062g02  |   |   | 10.6  | 16.0  | 14.6  | 1.6 | 0.5 | 1.1 | 0.2 |
| 5837 | 032d09 | BP093276 | MXL006a05 |   |   | 41.5  | 56.1  | 50.5  | 1.5 | 0.5 | 1.1 | 0.1 |
| 5838 | 107c06 | AV386704 | CM008e01  |   |   | 9.5   | 10.8  | 9.6   | 1.2 | 0.3 | 1.1 | 0.1 |
| 5839 | 029a12 | AV630589 | LCL081b09 |   |   | 4.9   | 4.1   | 3.6   | 0.9 | 0.3 | 1.1 | 0.1 |
| 5840 | 011b11 | AV634474 | HC033h03  |   |   | 6.0   | 6.9   | 6.3   | 1.2 | 0.3 | 1.1 | 0.3 |
| 5841 | 034g04 | BP096191 | MXL054c10 |   |   | 16.1  | 8.8   | 8.7   | 0.6 | 0.2 | 1.1 | 0.5 |
| 5842 | 008a12 | AV392830 | CM064f04  |   |   | 12.9  | 11.6  | 11.3  | 1.0 | 0.4 | 1.1 | 0.5 |
| 5843 | 104a12 | AV395587 | CL44e02   |   |   | 71.2  | 96.7  | 87.1  | 1.4 | 0.2 | 1.1 | 0.5 |
| 5844 | 111b07 | AV390211 | CM044b10  |   |   | 5.0   | 5.8   | 5.2   | 1.2 | 0.2 | 1.1 | 0.2 |
| 5845 | 107a04 | AV386872 | CM005e05  |   |   | 5.0   | 4.8   | 4.4   | 1.1 | 0.3 | 1.1 | 0.4 |
| 5846 | 107b11 | AV386846 | CM007g10  |   |   | 4.9   | 5.1   | 4.5   | 1.0 | 0.2 | 1.1 | 0.1 |
| 5847 | 025a04 | AV628962 | LCL018h12 |   |   | 10.5  | 10.4  | 9.1   | 1.0 | 0.3 | 1.1 | 0.2 |
| 5848 | 104c01 | AV397808 | CL45h10   |   |   | 6.0   | 8.7   | 8.3   | 1.4 | 0.2 | 1.1 | 0.5 |
| 5849 | 112c03 | AV391636 | CM055d11  |   |   | 26.8  | 31.2  | 28.0  | 1.2 | 0.1 | 1.1 | 0.1 |
| 5850 | 001a04 | AV393313 | CL01h01   |   |   | 3.6   | 6.8   | 6.2   | 2.0 | 0.8 | 1.1 | 0.3 |
| 5851 | 118g04 | AV634157 | HC029h12  |   |   | 4.9   | 5.2   | 4.6   | 1.0 | 0.2 | 1.1 | 0.1 |
| 5852 | 031g08 | BP087348 | MX032e12  |   |   | 7.9   | 8.1   | 7.5   | 1.0 | 0.1 | 1.1 | 0.2 |
| 5853 | 131h03 | AV644337 | HCL086f02 |   |   | 16.2  | 16.3  | 15.6  | 1.0 | 0.1 | 1.1 | 0.3 |
| 5854 | 016a02 | AV641578 | HCL036f06 |   |   | 12.1  | 7.7   | 7.0   | 0.7 | 0.3 | 1.1 | 0.4 |
| 5855 | 135c09 | AV619831 | LC014c10  |   |   | 38.9  | 35.0  | 32.0  | 0.9 | 0.1 | 1.1 | 0.2 |
| 5856 | 137b02 | AV621219 | LC032h05  |   |   | 28.1  | 24.0  | 21.5  | 0.8 | 0.2 | 1.1 | 0.4 |
| 5857 | 005d12 | AV388234 | CM024f03  |   |   | 3.9   | 5.5   | 5.1   | 1.4 | 0.4 | 1.1 | 0.6 |
| 5858 | 006e12 | AV390146 | CM042g08  |   |   | 6.2   | 7.6   | 6.9   | 1.2 | 0.7 | 1.1 | 0.7 |
| 5859 | 132a10 | AV644449 | HCL088g06 |   |   | 12.8  | 12.1  | 10.8  | 0.9 | 0.0 | 1.1 | 0.2 |
| 5860 | 026g08 | AV628552 | LCL043f07 |   |   | 6.2   | 6.4   | 5.7   | 1.1 | 0.2 | 1.1 | 0.1 |
| 5861 | 117g12 | AV633181 | HC017g03  |   |   | 100.0 | 95.3  | 83.9  | 1.0 | 0.0 | 1.1 | 0.1 |
| 5862 | 118c08 | AV633672 | HC023g11  |   |   | 5.2   | 4.8   | 4.3   | 0.9 | 0.2 | 1.1 | 0.3 |
| 5863 | 105a11 | AV396270 | CL57b12   |   |   | 63.4  | 93.3  | 86.0  | 1.5 | 0.2 | 1.1 | 0.4 |
| 5864 | 166c06 | BP095546 | MXL043f05 |   |   | 8.4   | 8.1   | 7.4   | 0.9 | 0.3 | 1.1 | 0.5 |
| 5865 | 145c11 | AV626613 | LCL012c09 |   |   | 10.2  | 15.7  | 14.2  | 1.6 | 0.4 | 1.1 | 0.2 |
| 5866 | 022c12 | AV623732 | LC067h08  |   |   | 14.1  | 13.3  | 11.9  | 1.0 | 0.1 | 1.1 | 0.1 |
| 5867 | 164d09 | BP094747 | MXL028f09 |   |   | 9.5   | 16.6  | 15.3  | 1.8 | 0.3 | 1.1 | 0.2 |
| 5868 | 011b02 | AV634293 | HC031e09  |   |   | 9.7   | 16.3  | 14.9  | 1.7 | 0.2 | 1.1 | 0.2 |
| 5869 | 114a06 | AV388703 | CM072c10  |   |   | 116.2 | 131.6 | 119.1 | 1.2 | 0.1 | 1.1 | 0.1 |
| 5870 | 112g05 | AV392290 | CM060f05  |   |   | 15.3  | 20.6  | 19.5  | 1.3 | 0.0 | 1.1 | 0.4 |
| 5871 | 122d09 | AV638264 | HC084a10  |   |   | 15.6  | 15.1  | 13.6  | 1.0 | 0.1 | 1.1 | 0.3 |
| 5872 | 130b03 | AV643249 | HCL066d03 |   |   | 20.5  | 22.0  | 20.4  | 1.1 | 0.1 | 1.1 | 0.3 |
| 5873 | 134b09 | AV619054 | LC003b05  |   |   | 106.5 | 111.8 | 104.0 | 1.1 | 0.1 | 1.1 | 0.3 |
| 5874 | 002b09 | AV394978 | CL33b03   |   |   | 2.1   | 2.5   | 2.3   | 1.3 | 0.2 | 1.1 | 0.2 |
| 5875 | 112e03 | AV391922 | CM057e01  |   |   | 11.2  | 7.9   | 7.4   | 0.8 | 0.3 | 1.1 | 0.2 |
| 5876 | 028e04 | AV630062 | LCL072d01 |   |   | 15.0  | 12.1  | 11.5  | 0.8 | 0.1 | 1.1 | 0.5 |
| 5877 | 102g09 | AV394711 | CL27g09   |   |   | 5.9   | 5.1   | 4.9   | 0.9 | 0.3 | 1.1 | 0.4 |
| 5878 | 110g12 | AV389840 | CM040c09  |   |   | 14.3  | 15.7  | 14.0  | 1.1 | 0.0 | 1.1 | 0.3 |
| 5879 | 150b01 | AV628846 | LCL047h12 |   |   | 12.0  | 7.9   | 7.1   | 0.7 | 0.2 | 1.1 | 0.1 |
| 5880 | 002g03 | AV395694 | CL47g09   |   |   | 15.4  | 23.6  | 20.8  | 1.6 | 0.2 | 1.1 | 0.2 |
| 5881 | 021a02 | AV621786 | LC040h11  |   |   | 8.0   | 5.5   | 5.3   | 0.7 | 0.1 | 1.1 | 0.5 |
| 5882 | 111e07 | AV390827 | CM048e04  |   |   |       |       |       |     |     |     |     |

|      | A      | B        | C         | D | E | F     | G     | H     | I   | J   | K   | L   |
|------|--------|----------|-----------|---|---|-------|-------|-------|-----|-----|-----|-----|
| 5883 | 028a12 | AV629592 | LCL061f01 |   |   | 7.3   | 7.7   | 7.2   | 1.1 | 0.1 | 1.1 | 0.5 |
| 5884 | 114f12 | AV389757 | CM079e05  |   |   | 50.5  | 55.3  | 48.8  | 1.1 | 0.3 | 1.1 | 0.2 |
| 5885 | 034e11 | BP095988 | MXL050f05 |   |   | 55.2  | 79.6  | 70.4  | 1.4 | 0.2 | 1.1 | 0.2 |
| 5886 | 143c09 | AV625665 | LC096b09  |   |   | 7.0   | 6.0   | 5.5   | 0.9 | 0.1 | 1.1 | 0.1 |
| 5887 | 012h05 | AV637593 | HC075b07  |   |   | 38.9  | 32.6  | 29.8  | 0.9 | 0.3 | 1.1 | 0.2 |
| 5888 | 153f04 | AV630563 | LCL080g09 |   |   | 9.9   | 8.8   | 8.1   | 0.9 | 0.1 | 1.1 | 0.2 |
| 5889 | 155e09 | AV631466 | LCL094e08 |   |   | 10.7  | 13.4  | 12.0  | 1.2 | 0.2 | 1.1 | 0.4 |
| 5890 | 122c02 | AV637966 | HC080a07  |   |   | 10.5  | 8.8   | 7.9   | 0.9 | 0.3 | 1.1 | 0.2 |
| 5891 | 165e11 | BP095259 | MXL039a03 |   |   | 8.9   | 11.0  | 9.7   | 1.3 | 0.5 | 1.1 | 0.2 |
| 5892 | 020e03 | AV621107 | LC031c11  |   |   | 8.6   | 6.7   | 6.1   | 0.8 | 0.2 | 1.1 | 0.3 |
| 5893 | 105e11 | AV396600 | CL65h02   |   |   | 5.2   | 5.8   | 6.0   | 1.1 | 0.0 | 1.1 | 0.6 |
| 5894 | 031e08 | BP087011 | MX022g10  |   |   | 17.4  | 14.0  | 12.6  | 0.8 | 0.2 | 1.1 | 0.1 |
| 5895 | 021d07 | AV622340 | LC048d04  |   |   | 17.2  | 17.6  | 16.6  | 1.0 | 0.2 | 1.1 | 0.2 |
| 5896 | 122f06 | AV638650 | HC089a06  |   |   | 9.3   | 10.8  | 9.7   | 1.2 | 0.4 | 1.1 | 0.2 |
| 5897 | 170e03 | BP097436 | MXL075f10 |   |   | 19.9  | 19.4  | 17.2  | 1.0 | 0.2 | 1.1 | 0.1 |
| 5898 | 129b01 | AV642660 | HCL055f03 |   |   | 9.5   | 8.2   | 7.9   | 0.9 | 0.2 | 1.1 | 0.4 |
| 5899 | 149c09 | AV628441 | LCL041h07 |   |   | 22.5  | 23.0  | 20.7  | 1.0 | 0.1 | 1.1 | 0.2 |
| 5900 | 137c07 | AV621426 | LC035h12  |   |   | 3.0   | 3.2   | 2.8   | 1.2 | 0.5 | 1.1 | 0.2 |
| 5901 | 026g05 | AV628537 | LCL043d12 |   |   | 14.4  | 16.2  | 14.4  | 1.1 | 0.2 | 1.1 | 0.1 |
| 5902 | 007d07 | AV391582 | CM055c07  |   |   | 5.5   | 5.3   | 4.9   | 1.0 | 0.1 | 1.1 | 0.2 |
| 5903 | 027h11 | AV629522 | LCL060c02 |   |   | 8.3   | 8.1   | 7.3   | 1.0 | 0.1 | 1.1 | 0.3 |
| 5904 | 008e06 | AV388511 | CM071b12  |   |   | 6.2   | 6.3   | 5.7   | 1.0 | 0.1 | 1.1 | 0.2 |
| 5905 | 018b04 | AV644190 | HCL083f04 |   |   | 10.8  | 14.0  | 11.9  | 1.2 | 0.3 | 1.1 | 0.5 |
| 5906 | 008c02 | AV393126 | CM067g06  |   |   | 8.0   | 8.5   | 7.6   | 1.1 | 0.1 | 1.1 | 0.2 |
| 5907 | 118h09 | AV634426 | HC033c02  |   |   | 5.0   | 5.5   | 5.0   | 1.1 | 0.4 | 1.1 | 0.2 |
| 5908 | 131c11 | AV644035 | HCL080f07 |   |   | 20.2  | 16.4  | 14.5  | 0.8 | 0.1 | 1.1 | 0.1 |
| 5909 | 006g04 | AV390424 | CM046a11  |   |   | 8.0   | 8.2   | 7.2   | 1.3 | 0.9 | 1.1 | 0.3 |
| 5910 | 112g01 | AV392252 | CM059h04  |   |   | 19.1  | 22.4  | 19.9  | 1.2 | 0.2 | 1.1 | 0.1 |
| 5911 | 020e08 | AV621136 | LC031g01  |   |   | 10.1  | 9.0   | 8.1   | 0.9 | 0.2 | 1.1 | 0.1 |
| 5912 | 132g09 | BP383762 | HCL094c09 |   |   | 8.7   | 9.4   | 8.5   | 1.1 | 0.1 | 1.1 | 0.2 |
| 5913 | 034a07 | BP095200 | MXL037h03 |   |   | 10.1  | 11.8  | 10.8  | 1.2 | 0.4 | 1.1 | 0.3 |
| 5914 | 115b02 | AV390381 | CM084d12  |   |   | 6.7   | 11.4  | 10.2  | 1.8 | 0.7 | 1.1 | 0.3 |
| 5915 | 026a03 | AV627970 | LCL034f08 |   |   | 6.1   | 5.8   | 5.5   | 1.0 | 0.2 | 1.1 | 0.4 |
| 5916 | 106c06 | AV397284 | CL77b09   |   |   | 8.1   | 11.1  | 9.9   | 1.4 | 0.2 | 1.1 | 0.2 |
| 5917 | 112d11 | AV391847 | CM057a02  |   |   | 19.8  | 20.4  | 18.3  | 1.0 | 0.2 | 1.1 | 0.3 |
| 5918 | 101b04 | AV397606 | CL02a04   |   |   | 1.6   | 2.0   | 2.2   | 1.4 | 0.7 | 1.1 | 0.5 |
| 5919 | 003b09 | AV396111 | CL56d08   |   |   | 5.2   | 5.9   | 5.4   | 1.3 | 0.6 | 1.1 | 0.2 |
| 5920 | 142a10 | AV624892 | LC084b10  |   |   | 11.2  | 9.1   | 8.3   | 0.8 | 0.1 | 1.1 | 0.2 |
| 5921 | 148a08 | AV627814 | LCL032d08 |   |   | 14.6  | 9.9   | 8.8   | 0.7 | 0.1 | 1.1 | 0.1 |
| 5922 | 119f06 | AV635269 | HC044b11  |   |   | 80.2  | 70.0  | 64.0  | 0.9 | 0.2 | 1.1 | 0.1 |
| 5923 | 140f02 | AV623950 | LC070h04  |   |   | 16.2  | 11.7  | 10.7  | 0.7 | 0.1 | 1.1 | 0.2 |
| 5924 | 027e03 | AV629223 | LCL054g03 |   |   | 17.8  | 14.1  | 13.2  | 0.8 | 0.1 | 1.1 | 0.3 |
| 5925 | 139a10 | AV622789 | LC054e06  |   |   | 11.4  | 8.1   | 7.4   | 0.8 | 0.2 | 1.1 | 0.2 |
| 5926 | 152c05 | AV629876 | LCL068b03 |   |   | 5.3   | 6.5   | 6.0   | 1.2 | 0.2 | 1.1 | 0.4 |
| 5927 | 127b02 | AV641635 | HCL037h04 |   |   | 7.6   | 7.9   | 7.1   | 1.0 | 0.3 | 1.1 | 0.4 |
| 5928 | 101b12 | AV393399 | CL03d02   |   |   | 7.1   | 7.8   | 7.0   | 1.1 | 0.2 | 1.1 | 0.3 |
| 5929 | 116c11 | AV397518 | CM098e10  |   |   | 53.1  | 64.1  | 57.3  | 1.2 | 0.1 | 1.1 | 0.2 |
| 5930 | 036g01 | BP098591 | MXL096a01 |   |   | 12.0  | 11.3  | 10.7  | 0.9 | 0.1 | 1.1 | 0.5 |
| 5931 | 159d09 | BP087788 | MX043f06  |   |   | 12.1  | 11.3  | 10.4  | 1.0 | 0.2 | 1.1 | 0.2 |
| 5932 | 157f07 | BP087108 | MX025e11  |   |   | 12.1  | 16.5  | 15.2  | 1.4 | 0.1 | 1.1 | 0.2 |
| 5933 | 109e10 | AV387698 | CM027f05  |   |   | 21.3  | 23.3  | 20.8  | 1.1 | 0.1 | 1.1 | 0.1 |
| 5934 | 112h08 | AV392478 | CM061f10  |   |   | 10.9  | 12.2  | 11.1  | 1.1 | 0.2 | 1.1 | 0.3 |
| 5935 | 124a04 | AV639936 | HCL007e05 |   |   | 5.2   | 4.6   | 4.1   | 0.9 | 0.3 | 1.1 | 0.3 |
| 5936 | 138c04 | AV622175 | LC046b06  |   |   | 23.2  | 28.6  | 25.7  | 1.2 | 0.3 | 1.1 | 0.2 |
| 5937 | 114h05 | AV390028 | CM081h09  |   |   | 20.0  | 30.0  | 27.3  | 1.5 | 0.2 | 1.1 | 0.2 |
| 5938 | 141a01 | AV624158 | LC073g03  |   |   | 31.4  | 21.9  | 19.4  | 0.7 | 0.1 | 1.1 | 0.4 |
| 5939 | 115c07 | AV390136 | CM086b05  |   |   | 23.4  | 27.5  | 28.6  | 1.5 | 0.9 | 1.1 | 0.6 |
| 5940 | 006e04 | AV390042 | CM041f05  |   |   | 2.7   | 4.6   | 4.1   | 1.8 | 0.6 | 1.1 | 0.2 |
| 5941 | 032c07 | BP093091 | MXL003c04 |   |   | 9.7   | 7.8   | 7.0   | 0.8 | 0.1 | 1.1 | 0.3 |
| 5942 | 164e09 | BP094787 | MXL029f11 |   |   | 31.3  | 27.8  | 25.7  | 0.9 | 0.2 | 1.1 | 0.2 |
| 5943 | 166c08 | BP095560 | MXL043h03 |   |   | 22.0  | 24.9  | 22.6  | 1.1 | 0.1 | 1.1 | 0.1 |
| 5944 | 011g07 | AV635451 | HC046e03  |   |   | 8.7   | 13.9  | 13.2  | 1.7 | 1.0 | 1.1 | 0.6 |
| 5945 | 112f05 | AV392113 | CM058c11  |   |   | 4.7   | 4.9   | 4.4   | 1.2 | 0.5 | 1.1 | 0.2 |
| 5946 | 134e07 | AV619363 | LC007c06  |   |   | 27.0  | 28.7  | 25.9  | 1.1 | 0.3 | 1.1 | 0.2 |
| 5947 | 111g06 | AV391120 | CM051b03  |   |   | 5.2   | 6.1   | 5.7   | 1.2 | 0.0 | 1.1 | 0.3 |
| 5948 | 131c10 | AV644029 | HCL080e07 |   |   | 7.1   | 5.9   | 5.8   | 0.8 | 0.2 | 1.1 | 0.4 |
| 5949 | 148f02 | AV628101 | LCL036g02 |   |   | 7.8   | 7.1   | 6.4   | 0.9 | 0.1 | 1.1 | 0.1 |
| 5950 | 151g08 | AV629685 | LCL063f11 |   |   | 24.0  | 34.3  | 30.4  | 1.4 | 0.2 | 1.1 | 0.5 |
| 5951 | 154c09 | AV630894 | LCL085h09 |   |   | 14.4  | 14.1  | 12.9  | 1.1 | 0.4 | 1.1 | 0.2 |
| 5952 | 144d08 | AV626247 | LCL005a09 |   |   | 5.8   | 5.7   | 5.3   | 1.0 | 0.2 | 1.1 | 0.4 |
| 5953 | 130a08 | AV643226 | HCL065h12 |   |   | 7.4   | 9.9   | 9.1   | 1.3 | 0.1 | 1.1 | 0.3 |
| 5954 | 166c09 | BP095581 | MXL044b06 |   |   | 39.8  | 50.5  | 45.4  | 1.3 | 0.1 | 1.1 | 0.1 |
| 5955 | 020c08 | AV620911 | LC028c03  |   |   | 8.2   | 15.8  | 15.5  | 1.9 | 0.7 | 1.1 | 0.4 |
| 5956 | 031a11 | BP086516 | MX010e09  |   |   | 9.6   | 8.7   | 7.7   | 0.9 | 0.2 | 1.1 | 0.2 |
| 5957 | 002f08 | AV397790 | CL45e04   |   |   | 10.7  | 11.5  | 10.5  | 1.1 | 0.1 | 1.1 | 0.2 |
| 5958 | 167b12 | BP095943 | MXL049g08 |   |   | 4.4   | 13.6  | 14.4  | 3.3 | 0.7 | 1.1 | 0.4 |
| 5959 | 152b09 | AV629829 | LCL067a11 |   |   | 5.3   | 4.9   | 4.4   | 1.0 | 0.3 | 1.1 | 0.1 |
| 5960 | 145f06 | AV626797 | LCL015e12 |   |   | 39.9  | 28.2  | 28.3  | 0.7 | 0.1 | 1.1 | 0.6 |
| 5961 | 004d10 | AV386762 | CM008e06  |   |   | 10.9  | 13.2  | 11.9  | 1.2 | 0.2 | 1.1 | 0.4 |
| 5962 | 143h11 | AV626050 | LCL001f12 |   |   | 15.5  | 12.3  | 11.1  | 0.8 | 0.1 | 1.1 | 0.1 |
| 5963 | 149a11 | AV628336 | LCL040c06 |   |   | 17.9  | 17.0  | 16.0  | 1.0 | 0.2 | 1.1 | 0.4 |
| 5964 | 008e02 | AV397356 | CM070d07  |   |   | 33.7  | 36.1  | 31.9  | 1.1 | 0.2 | 1.1 | 0.2 |
| 5965 | 134c02 | AV619101 | LC003g08  |   |   | 17.3  | 19.9  | 18.0  | 1.1 | 0.2 | 1.1 | 0.3 |
| 5966 | 128e06 | AV642428 | HCL051e12 |   |   | 7.9   | 8.8   | 7.9   | 1.1 | 0.3 | 1.1 | 0.5 |
| 5967 | 171b07 | BP097759 | MXL080h05 |   |   | 8.8   | 10.0  | 10.4  | 1.5 | 1.0 | 1.1 | 0.6 |
| 5968 | 112g12 | AV392340 | CM060h11  |   |   | 5.2   | 4.7   | 4.2   | 0.9 | 0.2 | 1.1 | 0.1 |
| 5969 | 120b08 | AV635831 | HC051e07  |   |   | 15.8  | 10.9  | 11.1  | 0.7 | 0.1 | 1.1 | 0.6 |
| 5970 | 155g04 | AV631589 | LCL096e10 |   |   | 14.0  | 17.4  | 16.0  | 1.3 | 0.3 | 1.1 | 0.2 |
| 5971 | 122e12 | AV638539 | HC087f06  |   |   | 12.1  | 12.6  | 12.3  | 1.1 | 0.2 | 1.1 | 0.4 |
| 5972 | 003g01 | AV396977 | CL73a08   |   |   | 6.4   | 8.2   | 7.6   | 1.4 | 0.4 | 1.1 | 0.2 |
| 5973 | 101e03 | AV393713 | CL09a09   |   |   | 3.5   | 4.0   | 3.6   | 1.2 | 0.3 | 1.1 | 0.2 |
| 5974 | 153a05 | AV630281 | LCL076f04 |   |   | 28.9  | 26.1  | 24.0  | 0.9 | 0.2 | 1.1 | 0.3 |
| 5975 | 016c08 | AV641966 | HCL043b10 |   |   | 5.5   | 8.1   | 7.3   | 1.4 | 0.2 | 1.1 | 0.2 |
| 5976 | 129e05 | AV642899 | HCL060b06 |   |   | 13.5  | 11.7  | 10.5  | 0.9 | 0.1 | 1.1 | 0.1 |
| 5977 | 136g11 | AV620922 | LC028f06  |   |   | 23.3  | 22.6  | 21.0  | 1.0 | 0.2 | 1.1 | 0.2 |
| 5978 | 107e08 | AV386967 | CM010f04  |   |   | 7.8   | 6.5   | 5.9   | 0.8 | 0.2 | 1.1 | 0.2 |
| 5979 | 103b01 | AV394999 | CL31g04   |   |   | 5.7   | 12.0  | 10.8  | 2.3 | 0.7 | 1.1 | 0.2 |
| 5980 | 015c03 | AV640849 | HCL023d12 |   |   | 4.5   | 9.3   | 8.3   | 2.1 | 0.4 | 1.1 | 0.2 |
| 5981 | 122h10 | AV639051 | HC094d05  |   |   | 4.3   | 5.1   | 4.6   | 1.2 | 0.2 | 1.1 | 0.1 |
| 5982 | 118a12 | AV633431 | HC020g02  |   |   | 9.8   | 9.7   | 9.1   | 1.0 | 0.1 | 1.1 | 0.5 |
| 5983 | 009e03 | AV391631 | CM092e02  |   |   | 7.6   | 8.8   | 7.9   | 1.2 | 0.1 | 1.1 | 0.2 |
| 5984 | 130e08 | AV643552 | HCL071e12 |   |   | 31.6  | 37.5  | 31.1  | 1.1 | 0.6 | 1.1 | 0.6 |
| 5985 | 116b06 | AV392410 | CM096g11  |   |   | 201.1 | 209.7 | 188.4 | 1.0 | 0.1 | 1.1 | 0.3 |
| 5986 | 014b02 | AV639735 | HCL004a05 |   |   | 9.3   | 11.4  | 10.3  | 1.2 | 0.1 | 1.1 | 0.2 |
| 5987 | 138e10 | AV622332 | LC048c07  |   |   | 12.4  | 45.8  | 43.5  | 3.8 | 0.6 | 1.1 | 0.3 |
| 5988 | 007a07 | AV391000 | CM049d06  |   |   | 10.0  | 8.6   | 9.0   | 1.0 | 0.6 | 1.1 | 0.6 |
| 5989 | 030h09 | BP086273 | MX005e05  |   |   | 10.6  | 3     |       |     |     |     |     |

|      | A      | B        | C         | D | E | F     | G     | H     | I   | J   | K   | L   |
|------|--------|----------|-----------|---|---|-------|-------|-------|-----|-----|-----|-----|
| 5990 | 119d10 | AV635041 | HC041b07  |   |   | 8.3   | 7.2   | 6.7   | 0.9 | 0.2 | 1.1 | 0.2 |
| 5991 | 024a04 | AV626268 | LCL005e10 |   |   | 24.0  | 21.6  | 19.8  | 0.9 | 0.1 | 1.1 | 0.2 |
| 5992 | 155c07 | AV631362 | LCL092f05 |   |   | 25.6  | 36.6  | 32.6  | 1.5 | 0.8 | 1.1 | 0.2 |
| 5993 | 148b09 | AV627868 | LCL033b03 |   |   | 7.4   | 9.9   | 8.7   | 1.3 | 0.4 | 1.1 | 0.3 |
| 5994 | 161f12 | BP093273 | MXL006a01 |   |   | 16.7  | 14.3  | 12.8  | 0.9 | 0.1 | 1.1 | 0.1 |
| 5995 | 028f12 | AV630215 | LCL075e05 |   |   | 8.4   | 8.5   | 7.7   | 1.0 | 0.1 | 1.1 | 0.2 |
| 5996 | 020a11 | AV620734 | LCO26b07  |   |   | 14.5  | 9.6   | 8.6   | 0.7 | 0.2 | 1.1 | 0.1 |
| 5997 | 148g01 | AV628149 | LCL037e04 |   |   | 21.5  | 18.4  | 16.8  | 0.9 | 0.1 | 1.1 | 0.1 |
| 5998 | 107b04 | BP098625 | MXL096e02 |   |   | 7.0   | 7.2   | 7.2   | 1.0 | 0.1 | 1.1 | 0.5 |
| 5999 | 122c08 | BP383719 | HC081d06  |   |   | 185.7 | 173.2 | 180.0 | 0.9 | 0.2 | 1.1 | 0.5 |
| 6000 | 008g06 | AV389517 | CM076a04  |   |   | 11.9  | 11.9  | 10.9  | 1.1 | 0.6 | 1.1 | 0.4 |
| 6001 | 105e01 | AV396504 | CL63g09   |   |   | 7.6   | 7.5   | 6.8   | 1.0 | 0.2 | 1.1 | 0.1 |
| 6002 | 152a05 | AV629748 | LCL065b07 |   |   | 28.6  | 25.6  | 24.9  | 0.9 | 0.0 | 1.1 | 0.3 |
| 6003 | 135d07 | AV619932 | LCO15b12  |   |   | 38.2  | 25.5  | 26.4  | 0.7 | 0.1 | 1.1 | 0.6 |
| 6004 | 156d02 | BP086061 | MX001b09  |   |   | 2.8   | 3.4   | 3.2   | 1.2 | 0.5 | 1.1 | 0.4 |
| 6005 | 102e04 | AV394464 | CL23b08   |   |   | 16.1  | 16.9  | 16.5  | 1.1 | 0.2 | 1.1 | 0.5 |
| 6006 | 139c07 | AV622977 | LCO57c08  |   |   | 3.0   | 3.2   | 2.9   | 1.1 | 0.2 | 1.1 | 0.1 |
| 6007 | 138f09 | AV622499 | LCO50e04  |   |   | 7.3   | 9.7   | 8.7   | 1.3 | 0.1 | 1.1 | 0.1 |
| 6008 | 007c08 | AV391395 | CM053h02  |   |   | 8.1   | 8.0   | 7.2   | 1.0 | 0.1 | 1.1 | 0.2 |
| 6009 | 125e08 | AV640678 | HCL020d10 |   |   | 5.9   | 6.5   | 6.2   | 1.1 | 0.1 | 1.1 | 0.3 |
| 6010 | 154e04 | AV630981 | LCL087b12 |   |   | 8.8   | 9.2   | 8.3   | 1.0 | 0.1 | 1.1 | 0.3 |
| 6011 | 126h01 | AV641504 | HCL034h03 |   |   | 8.3   | 8.0   | 7.2   | 1.0 | 0.2 | 1.1 | 0.1 |
| 6012 | 171g08 | BP098084 | MXL086f12 |   |   | 8.0   | 7.4   | 7.4   | 0.9 | 0.4 | 1.1 | 0.7 |
| 6013 | 002c04 | AV395068 | CL35b11   |   |   | 2.6   | 2.8   | 2.6   | 1.1 | 0.2 | 1.1 | 0.3 |
| 6014 | 134e06 | AV619359 | LCO07b11  |   |   | 14.7  | 15.3  | 13.8  | 1.0 | 0.2 | 1.1 | 0.2 |
| 6015 | 149c07 | AV628437 | LCL041h02 |   |   | 12.5  | 16.8  | 15.4  | 1.3 | 0.1 | 1.1 | 0.1 |
| 6016 | 136d04 | BP383784 | LCO25c03  |   |   | 17.6  | 33.2  | 30.0  | 2.0 | 0.6 | 1.1 | 0.1 |
| 6017 | 154e07 | AV630994 | LCL087d03 |   |   | 34.5  | 34.6  | 31.7  | 1.1 | 0.2 | 1.1 | 0.3 |
| 6018 | 027b04 | AV628902 | LCL048g01 |   |   | 4.5   | 4.7   | 4.9   | 1.0 | 0.2 | 1.1 | 0.5 |
| 6019 | 140c10 | AV623762 | LCO68c10  |   |   | 21.9  | 20.7  | 18.8  | 1.0 | 0.2 | 1.1 | 0.2 |
| 6020 | 119d08 | AV635021 | HC040h07  |   |   | 10.4  | 7.2   | 7.8   | 0.7 | 0.2 | 1.1 | 0.7 |
| 6021 | 026b12 | AV628165 | LCL037g02 |   |   | 9.0   | 7.7   | 7.9   | 0.9 | 0.2 | 1.1 | 0.5 |
| 6022 | 132e01 | BP383760 | HCL092e06 |   |   | 15.5  | 15.6  | 14.1  | 1.0 | 0.1 | 1.1 | 0.0 |
| 6023 | 019f11 | AV620191 | LCO18g09  |   |   | 16.0  | 14.7  | 13.6  | 0.9 | 0.2 | 1.1 | 0.2 |
| 6024 | 113b02 | AV392753 | CM063f07  |   |   | 7.1   | 5.4   | 5.0   | 1.0 | 0.6 | 1.1 | 0.4 |
| 6025 | 103a02 | AV394769 | CL30b09   |   |   | 2.4   | 2.9   | 2.7   | 1.3 | 0.4 | 1.1 | 0.3 |
| 6026 | 123c08 | AV639453 | HC099f01  |   |   | 22.4  | 18.0  | 17.9  | 0.8 | 0.2 | 1.1 | 0.6 |
| 6027 | 022f07 | AV624067 | LCO72e03  |   |   | 11.1  | 10.5  | 9.5   | 1.0 | 0.1 | 1.1 | 0.2 |
| 6028 | 147c05 | AV627443 | LCL026h01 |   |   | 12.0  | 15.4  | 14.1  | 1.3 | 0.1 | 1.1 | 0.2 |
| 6029 | 133d08 | AV645057 | HCL097f01 |   |   | 50.5  | 44.5  | 40.2  | 0.9 | 0.1 | 1.1 | 0.1 |
| 6030 | 130b01 | AV643244 | HCL066c08 |   |   | 11.3  | 8.0   | 7.7   | 0.7 | 0.1 | 1.1 | 0.5 |
| 6031 | 121f09 | BP383713 | HC072f05  |   |   | 47.7  | 27.6  | 25.7  | 0.6 | 0.4 | 1.1 | 0.7 |
| 6032 | 138d07 | AV622242 | LCO47a05  |   |   | 199.3 | 195.3 | 183.5 | 1.0 | 0.1 | 1.1 | 0.2 |
| 6033 | 013c01 | AV638217 | HC083d07  |   |   | 4.4   | 7.9   | 7.0   | 1.8 | 0.6 | 1.1 | 0.4 |
| 6034 | 016h12 | AV642716 | HCL056f02 |   |   | 3.3   | 4.2   | 3.9   | 1.2 | 0.3 | 1.1 | 0.9 |
| 6035 | 163f07 | BP094413 | MXL022g03 |   |   | 12.8  | 15.9  | 14.5  | 1.2 | 0.1 | 1.1 | 0.2 |
| 6036 | 168g01 | BP096668 | MXL062f12 |   |   | 7.3   | 7.7   | 8.7   | 1.1 | 0.9 | 1.1 | 1.0 |
| 6037 | 117f10 | AV633010 | HC015e11  |   |   | 7.3   | 5.1   | 4.6   | 0.8 | 0.2 | 1.1 | 0.1 |
| 6038 | 167f07 | BP096140 | MXL053d09 |   |   | 61.2  | 76.6  | 68.6  | 1.2 | 0.3 | 1.1 | 0.5 |
| 6039 | 106d05 | AV397149 | CL79d04   |   |   | 15.5  | 14.9  | 13.6  | 1.0 | 0.2 | 1.1 | 0.2 |
| 6040 | 107f03 | BP098627 | MXL096e05 |   |   | 16.0  | 15.6  | 13.8  | 1.0 | 0.3 | 1.1 | 0.1 |
| 6041 | 025g09 | AV627839 | LCL032g05 |   |   | 11.9  | 15.3  | 15.5  | 1.3 | 0.1 | 1.1 | 0.5 |
| 6042 | 109c07 | AV388059 | CM025c04  |   |   | 8.7   | 6.5   | 5.9   | 0.7 | 0.2 | 1.1 | 0.1 |
| 6043 | 003e02 | AV396634 | CL64g08   |   |   | 6.8   | 5.6   | 5.5   | 0.8 | 0.1 | 1.1 | 0.3 |
| 6044 | 006e07 | AV390050 | CM041h06  |   |   | 9.5   | 12.4  | 11.1  | 1.3 | 0.5 | 1.1 | 0.3 |
| 6045 | 102b07 | AV394193 | CL19d12   |   |   | 4.5   | 4.9   | 4.4   | 1.1 | 0.1 | 1.1 | 0.3 |
| 6046 | 118d12 | AV633798 | HC025d07  |   |   | 3.9   | 4.4   | 4.1   | 1.1 | 0.3 | 1.1 | 0.4 |
| 6047 | 135c10 | AV619746 | LCO14d02  |   |   | 11.1  | 10.2  | 9.4   | 0.9 | 0.1 | 1.1 | 0.2 |
| 6048 | 105a03 | AV396095 | CL56c02   |   |   | 3.6   | 4.8   | 5.2   | 1.6 | 0.6 | 1.1 | 0.6 |
| 6049 | 134e09 | AV619368 | LCO07d02  |   |   | 35.5  | 37.8  | 33.9  | 1.1 | 0.3 | 1.1 | 0.1 |
| 6050 | 119b09 | AV634699 | HC036f09  |   |   | 5.2   | 4.4   | 4.1   | 0.9 | 0.1 | 1.1 | 0.2 |
| 6051 | 020e12 | AV621234 | LCO33b08  |   |   | 13.1  | 14.8  | 13.3  | 1.2 | 0.3 | 1.1 | 0.0 |
| 6052 | 114g12 | AV389891 | CM081d03  |   |   | 18.2  | 10.9  | 9.9   | 0.6 | 0.1 | 1.1 | 0.3 |
| 6053 | 036c04 | BP098313 | MXL091c12 |   |   | 6.1   | 4.4   | 4.4   | 0.8 | 0.2 | 1.1 | 0.6 |
| 6054 | 137b10 | AV621271 | LCO33f12  |   |   | 27.2  | 27.1  | 25.0  | 1.0 | 0.1 | 1.1 | 0.1 |
| 6055 | 143f10 | BP098799 | MXL099c11 |   |   | 82.6  | 82.8  | 83.5  | 1.0 | 0.1 | 1.1 | 0.6 |
| 6056 | 107f12 | AV386923 | CM011h12  |   |   | 23.0  | 17.1  | 15.5  | 0.8 | 0.1 | 1.1 | 0.1 |
| 6057 | 135h07 | AV620342 | LCO20g11  |   |   | 7.4   | 7.9   | 7.3   | 1.1 | 0.4 | 1.1 | 0.2 |
| 6058 | 105a06 | AV396098 | CL56g02   |   |   | 26.1  | 24.1  | 21.7  | 0.9 | 0.3 | 1.1 | 0.2 |
| 6059 | 145c02 | AV626568 | LCL011e06 |   |   | 19.7  | 17.4  | 16.0  | 1.0 | 0.4 | 1.1 | 0.2 |
| 6060 | 101g10 | AV393962 | CL15h07   |   |   | 8.2   | 7.1   | 7.3   | 0.8 | 0.2 | 1.1 | 0.7 |
| 6061 | 017b03 | AV642884 | HCL059h05 |   |   | 3.4   | 5.1   | 4.6   | 1.5 | 0.4 | 1.1 | 0.4 |
| 6062 | 168d05 | BP096480 | MXL059d06 |   |   | 11.7  | 12.8  | 11.4  | 1.1 | 0.4 | 1.1 | 0.4 |
| 6063 | 116e10 | AV393218 | CM100b10  |   |   | 15.4  | 12.2  | 11.3  | 0.9 | 0.2 | 1.1 | 0.2 |
| 6064 | 108h06 | AV387860 | CM022e12  |   |   | 9.6   | 9.2   | 8.3   | 0.9 | 0.2 | 1.1 | 0.2 |
| 6065 | 032f04 | BP093488 | MXL009b01 |   |   | 5.8   | 7.1   | 6.5   | 1.2 | 0.1 | 1.1 | 0.1 |
| 6066 | 138c11 | BP383795 | LCO46f03  |   |   | 2.8   | 4.6   | 4.3   | 1.7 | 0.3 | 1.1 | 0.2 |
| 6067 | 117h06 | AV633216 | HC018b08  |   |   | 36.2  | 36.0  | 32.2  | 1.0 | 0.1 | 1.1 | 0.1 |
| 6068 | 170c02 | BP097323 | MXL073g06 |   |   | 10.8  | 11.6  | 11.2  | 1.5 | 0.8 | 1.1 | 0.3 |
| 6069 | 026c08 | AV628257 | LCL039c01 |   |   | 11.7  | 15.3  | 14.2  | 1.3 | 0.2 | 1.1 | 0.3 |
| 6070 | 157e07 | BP086996 | MX022e02  |   |   | 58.7  | 39.4  | 33.2  | 0.6 | 0.2 | 1.1 | 0.6 |
| 6071 | 034f10 | BP096152 | MXL053f09 |   |   | 8.7   | 9.8   | 9.0   | 1.2 | 0.2 | 1.1 | 0.2 |
| 6072 | 171e09 | BP097980 | MXL084f01 |   |   | 20.3  | 27.4  | 25.0  | 1.4 | 0.4 | 1.1 | 0.1 |
| 6073 | 112e10 | AV391976 | CM057h05  |   |   | 229.1 | 249.7 | 219.7 | 1.1 | 0.3 | 1.1 | 0.3 |
| 6074 | 034e07 | BP095907 | MXL049b02 |   |   | 19.1  | 17.9  | 16.2  | 0.9 | 0.0 | 1.1 | 0.0 |
| 6075 | 121c05 | AV636989 | HC067b03  |   |   | 7.5   | 8.3   | 7.8   | 1.1 | 0.2 | 1.1 | 0.3 |
| 6076 | 149b01 | AV628343 | LCL040d02 |   |   | 26.6  | 24.0  | 21.9  | 0.9 | 0.1 | 1.1 | 0.1 |
| 6077 | 003c11 | AV397924 | CL59e11   |   |   | 8.2   | 9.1   | 10.5  | 1.2 | 0.5 | 1.1 | 0.7 |
| 6078 | 126g12 | AV641490 | HCL034f04 |   |   | 13.0  | 11.5  | 11.4  | 0.9 | 0.2 | 1.1 | 0.5 |
| 6079 | 166f07 | BP095729 | MXL046e02 |   |   | 12.4  | 10.8  | 10.4  | 0.9 | 0.2 | 1.1 | 0.4 |
| 6080 | 111a03 | AV390046 | CM041g06  |   |   | 7.6   | 8.9   | 8.2   | 1.2 | 0.2 | 1.1 | 0.3 |
| 6081 | 003f01 | AV396936 | CL68g12   |   |   | 6.3   | 6.9   | 6.4   | 1.2 | 0.4 | 1.1 | 0.2 |
| 6082 | 036f09 | BP098533 | MXL094h03 |   |   | 7.3   | 3.7   | 5.4   | 0.7 | 0.3 | 1.1 | 0.9 |
| 6083 | 032h03 | BP093671 | MXL011g12 |   |   | 19.0  | 15.3  | 26.2  | 0.9 | 0.2 | 1.1 | 0.8 |
| 6084 | 108e01 | AV387355 | CM019e10  |   |   | 32.5  | 56.9  | 54.3  | 1.8 | 0.1 | 1.1 | 0.2 |
| 6085 | 153h02 | AV630689 | LCL082g03 |   |   | 7.4   | 8.6   | 8.2   | 1.2 | 0.1 | 1.1 | 0.3 |
| 6086 | 115a09 | AV390386 | CM083f07  |   |   | 10.0  | 11.9  | 11.6  | 1.2 | 0.2 | 1.1 | 0.5 |
| 6087 | 028g12 | AV630319 | LCL077b12 |   |   | 9.3   | 9.0   | 10.6  | 1.0 | 0.0 | 1.1 | 0.8 |
| 6088 | 138h04 | AV622653 | LCO52e05  |   |   | 32.4  | 29.7  | 27.6  | 0.9 | 0.1 | 1.1 | 0.2 |
| 6089 | 133g05 | AV645201 | HCL099e06 |   |   | 8.8   | 9.2   | 8.4   | 1.1 | 0.1 | 1.1 | 0.1 |
| 6090 | 016h07 | AV642693 | HCL056b07 |   |   | 16.5  | 15.2  | 17.1  | 1.0 | 0.4 | 1.1 | 0.6 |
| 6091 | 101h03 | AV394031 | CL16g02   |   |   | 15.3  | 13.8  | 12.9  | 1.0 | 0.3 | 1.1 | 0.3 |
| 6092 | 108g09 | AV387934 | CM021g10  |   |   | 12.0  | 10.9  | 10.5  | 0.9 | 0.1 | 1.1 | 0.5 |
| 6093 | 136d05 | AV620669 | LCO25c05  |   |   | 5.5   | 5.9   | 5.6   | 1.1 | 0.3 | 1.1 | 0.3 |
| 6094 | 157d12 | BP086893 | MX019f10  |   |   | 20.6  | 9.3   | 9.8   | 0.4 | 0.1 | 1.1 | 0.7 |
| 6095 | 005g06 | AV388359 | CM029a06  |   |   | 9.6   | 7.2   | 6.4   | 0.9 | 0.5 | 1.1 | 0.2 |
| 6096 | 151f04 | AV629596 | LCL061f11 |   |   | 7.9   | 9.5   | 8.8   |     |     |     |     |

|      | A      | B        | C         | D | E | F     | G     | H     | I   | J   | K   | L   |
|------|--------|----------|-----------|---|---|-------|-------|-------|-----|-----|-----|-----|
| 6097 | 131e03 | AV644161 | HCL083b04 |   |   | 9.2   | 8.6   | 8.5   | 1.0 | 0.1 | 1.1 | 0.3 |
| 6098 | 153g01 | AV630609 | LCL081e04 |   |   | 13.9  | 19.6  | 18.5  | 1.4 | 0.2 | 1.1 | 0.2 |
| 6099 | 152b02 | AV629803 | LCL066d09 |   |   | 16.7  | 12.9  | 11.8  | 0.8 | 0.2 | 1.1 | 0.1 |
| 6100 | 120f08 | BP383706 | HC057e06  |   |   | 58.9  | 51.7  | 51.1  | 0.9 | 0.1 | 1.1 | 0.4 |
| 6101 | 103f09 | AV395356 | CL40e10   |   |   | 5.6   | 6.0   | 5.9   | 1.1 | 0.3 | 1.1 | 0.4 |
| 6102 | 117g04 | AV633075 | HC016d12  |   |   | 33.5  | 37.9  | 35.2  | 1.2 | 0.4 | 1.1 | 0.3 |
| 6103 | 167e05 | BP096093 | MXL052e11 |   |   | 12.1  | 14.3  | 13.9  | 1.2 | 0.1 | 1.1 | 0.6 |
| 6104 | 147c09 | AV627471 | LCL027c04 |   |   | 25.3  | 20.8  | 18.9  | 0.8 | 0.0 | 1.1 | 0.1 |
| 6105 | 124d12 | AV640150 | HCL011c07 |   |   | 33.6  | 34.6  | 33.4  | 1.0 | 0.2 | 1.1 | 0.4 |
| 6106 | 151g06 | AV629653 | LCL062f11 |   |   | 11.5  | 14.8  | 13.7  | 1.3 | 0.4 | 1.1 | 0.5 |
| 6107 | 018a10 | AV644127 | HCL082e01 |   |   | 19.7  | 13.7  | 15.4  | 0.8 | 0.4 | 1.1 | 0.6 |
| 6108 | 009d02 | AV391035 | CM088f12  |   |   | 14.1  | 14.9  | 13.6  | 1.1 | 0.3 | 1.1 | 0.1 |
| 6109 | 021f08 | AV622678 | LCO52h07  |   |   | 16.6  | 9.9   | 9.3   | 0.6 | 0.2 | 1.1 | 0.5 |
| 6110 | 102g05 | AV394687 | CL27b06   |   |   | 23.6  | 26.8  | 23.8  | 1.1 | 0.1 | 1.1 | 0.1 |
| 6111 | 030a09 | AV631319 | LCL091h12 |   |   | 11.9  | 12.0  | 11.1  | 1.0 | 0.1 | 1.1 | 0.3 |
| 6112 | 112a08 | AV391410 | CM053h12  |   |   | 90.0  | 87.7  | 81.7  | 1.1 | 0.5 | 1.1 | 0.3 |
| 6113 | 103e08 | AV395316 | CL38f07   |   |   | 14.2  | 13.0  | 12.0  | 0.9 | 0.1 | 1.1 | 0.1 |
| 6114 | 131f03 | BP383753 | HCL084b06 |   |   | 33.4  | 51.3  | 51.8  | 1.5 | 0.2 | 1.1 | 0.5 |
| 6115 | 007a02 | AV390931 | CM048h06  |   |   | 10.3  | 12.5  | 11.5  | 1.2 | 0.2 | 1.1 | 0.3 |
| 6116 | 105h04 | AV396835 | CL70c07   |   |   | 5.0   | 4.7   | 4.4   | 0.9 | 0.2 | 1.1 | 0.3 |
| 6117 | 025h11 | AV627938 | LCL034b08 |   |   | 8.2   | 8.7   | 8.0   | 1.1 | 0.1 | 1.1 | 0.1 |
| 6118 | 143b11 | AV625630 | LCO95f09  |   |   | 172.1 | 189.2 | 186.0 | 1.1 | 0.1 | 1.1 | 0.3 |
| 6119 | 159e02 | BP087796 | MX043g07  |   |   | 24.1  | 23.9  | 25.4  | 1.1 | 0.4 | 1.1 | 0.5 |
| 6120 | 144e03 | AV626265 | LCL005e01 |   |   | 17.3  | 35.4  | 32.1  | 2.0 | 0.1 | 1.1 | 0.1 |
| 6121 | 136g07 | AV620887 | LCO28b08  |   |   | 9.7   | 5.6   | 5.0   | 0.6 | 0.2 | 1.1 | 0.2 |
| 6122 | 147a07 | AV627353 | LCL025e02 |   |   | 13.0  | 11.5  | 10.6  | 0.9 | 0.1 | 1.1 | 0.2 |
| 6123 | 101b05 | AV397596 | CL02b09   |   |   | 6.0   | 6.3   | 5.7   | 1.0 | 0.2 | 1.1 | 0.3 |
| 6124 | 020h11 | AV621750 | LCO40e01  |   |   | 7.4   | 5.5   | 6.0   | 0.8 | 0.1 | 1.1 | 0.4 |
| 6125 | 002b03 | AV395040 | CL31b05   |   |   | 3.2   | 4.5   | 4.1   | 1.4 | 0.2 | 1.1 | 0.1 |
| 6126 | 102d11 | AV394227 | CL22d02   |   |   | 5.0   | 3.8   | 3.6   | 0.9 | 0.4 | 1.1 | 0.1 |
| 6127 | 109c04 | AV388091 | CM025b02  |   |   | 10.9  | 7.7   | 7.2   | 0.7 | 0.1 | 1.1 | 0.2 |
| 6128 | 023a06 | AV624589 | LCO79g11  |   |   | 8.5   | 9.8   | 9.3   | 1.2 | 0.3 | 1.1 | 0.3 |
| 6129 | 034b06 | BP095328 | MXL040a04 |   |   | 8.3   | 5.5   | 5.3   | 0.7 | 0.1 | 1.1 | 0.5 |
| 6130 | 115h02 | AV391697 | CM092f10  |   |   | 10.0  | 14.0  | 13.2  | 1.4 | 0.2 | 1.1 | 0.3 |
| 6131 | 033h08 | BP095085 | MXL035e08 |   |   | 3.8   | 4.9   | 4.4   | 1.3 | 0.3 | 1.1 | 0.2 |
| 6132 | 147g11 | AV627697 | LCL030g01 |   |   | 13.6  | 26.5  | 24.1  | 1.9 | 0.3 | 1.1 | 0.3 |
| 6133 | 165c07 | BP095141 | MXL036e05 |   |   | 17.7  | 21.8  | 19.3  | 1.2 | 0.6 | 1.1 | 0.4 |
| 6134 | 122d11 | AV638275 | HC084c06  |   |   | 327.2 | 348.5 | 341.3 | 1.1 | 0.1 | 1.1 | 0.4 |
| 6135 | 018e01 | AV644558 | HCL090e06 |   |   | 3.8   | 3.7   | 3.6   | 1.1 | 0.5 | 1.1 | 0.3 |
| 6136 | 158d01 | BP087631 | MX039f07  |   |   | 38.5  | 32.4  | 31.6  | 1.0 | 0.4 | 1.1 | 0.2 |
| 6137 | 031b03 | BP086544 | MX011b05  |   |   | 12.7  | 20.2  | 18.8  | 1.7 | 0.5 | 1.1 | 0.2 |
| 6138 | 149h11 | AV628754 | LCL046f04 |   |   | 10.5  | 11.2  | 10.2  | 1.1 | 0.1 | 1.1 | 0.1 |
| 6139 | 103g01 | AV395351 | CL40g09   |   |   | 9.2   | 6.0   | 5.5   | 0.7 | 0.0 | 1.1 | 0.2 |
| 6140 | 160c07 | BP088519 | MX062d04  |   |   | 25.0  | 22.3  | 20.7  | 0.9 | 0.4 | 1.1 | 0.5 |
| 6141 | 142a08 | AV624883 | LCO84a11  |   |   | 268.5 | 276.0 | 266.3 | 1.0 | 0.1 | 1.1 | 0.4 |
| 6142 | 002d02 | AV395154 | CL38h08   |   |   | 3.6   | 4.2   | 3.8   | 1.2 | 0.1 | 1.1 | 0.1 |
| 6143 | 132d06 | AV644684 | HCL092b10 |   |   | 6.3   | 5.4   | 5.1   | 0.9 | 0.1 | 1.1 | 0.3 |
| 6144 | 107g10 | AV387086 | CM013a07  |   |   | 7.8   | 6.4   | 5.9   | 0.8 | 0.1 | 1.1 | 0.1 |
| 6145 | 118a06 | AV633347 | HC019g06  |   |   | 7.8   | 7.3   | 9.0   | 0.9 | 0.2 | 1.1 | 0.7 |
| 6146 | 144c11 | AV626225 | LCL004f06 |   |   | 15.8  | 11.9  | 11.0  | 0.8 | 0.2 | 1.1 | 0.2 |
| 6147 | 010f12 | AV633429 | HC020f11  |   |   | 7.5   | 7.8   | 7.3   | 1.1 | 0.6 | 1.1 | 0.6 |
| 6148 | 111b02 | AV390185 | CM043d06  |   |   | 7.5   | 11.3  | 10.9  | 1.6 | 0.4 | 1.1 | 0.3 |
| 6149 | 127h02 | AV642030 | HCL044c01 |   |   | 7.8   | 8.7   | 7.9   | 1.2 | 0.2 | 1.1 | 0.1 |
| 6150 | 133d09 | AV645058 | HCL097f02 |   |   | 19.9  | 12.6  | 11.6  | 0.6 | 0.2 | 1.1 | 0.3 |
| 6151 | 127c10 | AV641754 | HCL039g09 |   |   | 7.4   | 6.2   | 6.0   | 0.9 | 0.1 | 1.1 | 0.3 |
| 6152 | 113b03 | AV392786 | CM063h08  |   |   | 28.6  | 54.9  | 50.6  | 2.0 | 0.4 | 1.1 | 0.1 |
| 6153 | 154c04 | AV630866 | LCL085d10 |   |   | 9.0   | 8.9   | 8.8   | 1.3 | 0.8 | 1.1 | 0.3 |
| 6154 | 003c03 | AV396206 | CL58c06   |   |   | 7.0   | 5.5   | 5.0   | 0.8 | 0.1 | 1.1 | 0.1 |
| 6155 | 103e09 | AV395321 | CL38h08   |   |   | 31.9  | 19.9  | 19.7  | 0.6 | 0.1 | 1.1 | 0.6 |
| 6156 | 002e01 | AV395444 | CL41g06   |   |   | 9.6   | 13.9  | 12.8  | 1.5 | 0.3 | 1.1 | 0.2 |
| 6157 | 033g02 | BP094814 | MXL030b12 |   |   | 12.1  | 10.3  | 9.5   | 0.9 | 0.5 | 1.1 | 0.4 |
| 6158 | 006a02 | AV398786 | CM032d01  |   |   | 7.2   | 8.0   | 7.4   | 1.2 | 0.3 | 1.1 | 0.2 |
| 6159 | 021h03 | AV623013 | LCO57g09  |   |   | 8.5   | 7.3   | 7.2   | 0.9 | 0.2 | 1.1 | 0.3 |
| 6160 | 154a05 | AV630764 | LCL084a05 |   |   | 25.8  | 22.8  | 20.8  | 0.9 | 0.3 | 1.1 | 0.0 |
| 6161 | 101d09 | AV393504 | CL08a04   |   |   | 5.1   | 6.1   | 5.6   | 1.3 | 0.5 | 1.1 | 0.2 |
| 6162 | 022f12 | AV624120 | LCO73c03  |   |   | 7.4   | 8.3   | 8.1   | 1.1 | 0.2 | 1.1 | 0.5 |
| 6163 | 147f12 | AV627662 | LCL030c02 |   |   | 8.7   | 8.0   | 7.4   | 0.9 | 0.1 | 1.1 | 0.4 |
| 6164 | 129d02 | AV642811 | HCL058e06 |   |   | 10.3  | 8.9   | 8.6   | 0.9 | 0.1 | 1.1 | 0.3 |
| 6165 | 030b10 | AV631455 | LCL094c09 |   |   | 3.6   | 2.9   | 2.6   | 0.9 | 0.2 | 1.1 | 0.2 |
| 6166 | 015g02 | AV641340 | HCL031h07 |   |   | 4.4   | 5.4   | 5.0   | 1.3 | 0.3 | 1.1 | 0.1 |
| 6167 | 104h07 | AV396053 | CL55c06   |   |   | 6.4   | 5.4   | 5.1   | 0.9 | 0.3 | 1.1 | 0.3 |
| 6168 | 122d03 | AV638172 | HC082h01  |   |   | 9.9   | 9.6   | 9.0   | 1.0 | 0.2 | 1.1 | 0.2 |
| 6169 | 140f10 | AV623993 | LCO71e03  |   |   | 10.7  | 9.6   | 9.0   | 0.9 | 0.1 | 1.1 | 0.3 |
| 6170 | 028a11 | AV629588 | LCL061e07 |   |   | 9.4   | 7.1   | 6.5   | 0.8 | 0.1 | 1.1 | 0.2 |
| 6171 | 012c07 | AV636429 | HC059d03  |   |   | 12.6  | 13.0  | 13.0  | 1.1 | 0.4 | 1.1 | 0.4 |
| 6172 | 119d04 | AV634957 | HC040b03  |   |   | 105.9 | 89.9  | 84.5  | 0.8 | 0.1 | 1.1 | 0.3 |
| 6173 | 130b09 | AV643284 | HCL067a02 |   |   | 28.0  | 28.4  | 26.0  | 1.0 | 0.3 | 1.1 | 0.1 |
| 6174 | 154h03 | AV631169 | LCL089g09 |   |   | 13.0  | 8.9   | 8.5   | 0.8 | 0.4 | 1.1 | 0.2 |
| 6175 | 160f06 | BP088927 | MX102g07  |   |   | 112.6 | 116.5 | 105.8 | 1.1 | 0.1 | 1.1 | 0.3 |
| 6176 | 036b07 | BP097868 | MXL082f08 |   |   | 10.4  | 14.9  | 13.5  | 1.4 | 0.1 | 1.1 | 0.3 |
| 6177 | 013a11 | AV637889 | HC079a02  |   |   | 6.5   | 5.0   | 5.4   | 0.8 | 0.4 | 1.1 | 0.6 |
| 6178 | 107h04 | AV387087 | CM013e07  |   |   | 12.3  | 8.2   | 7.6   | 0.7 | 0.1 | 1.1 | 0.2 |
| 6179 | 020h01 | AV621533 | LCO37d04  |   |   | 51.9  | 64.8  | 59.6  | 1.2 | 0.1 | 1.1 | 0.2 |
| 6180 | 112d07 | AV391816 | CM056f02  |   |   | 3.8   | 4.1   | 3.8   | 1.1 | 0.3 | 1.1 | 0.1 |
| 6181 | 002h01 | AV397756 | CL49h12   |   |   | 6.1   | 7.8   | 7.2   | 1.4 | 0.4 | 1.1 | 0.2 |
| 6182 | 013f06 | AV639104 | HC095a08  |   |   | 35.4  | 31.7  | 29.6  | 0.9 | 0.1 | 1.1 | 0.2 |
| 6183 | 035b08 | BP096719 | MXL063f11 |   |   | 6.8   | 6.8   | 6.3   | 1.0 | 0.2 | 1.1 | 0.2 |
| 6184 | 123a01 | AV639066 | HC094e11  |   |   | 214.9 | 150.8 | 152.6 | 0.7 | 0.1 | 1.1 | 0.6 |
| 6185 | 158c07 | BP087596 | MX038d05  |   |   | 23.4  | 21.2  | 19.1  | 1.0 | 0.6 | 1.1 | 0.5 |
| 6186 | 160e08 | BP088723 | MX067c12  |   |   | 5.8   | 5.7   | 5.7   | 1.0 | 0.2 | 1.1 | 0.3 |
| 6187 | 009c10 | AV390821 | CM088a04  |   |   | 9.7   | 10.5  | 9.8   | 1.1 | 0.2 | 1.1 | 0.2 |
| 6188 | 116a11 | AV392181 | CM096a06  |   |   | 98.3  | 69.1  | 63.4  | 0.7 | 0.1 | 1.1 | 0.1 |
| 6189 | 011b05 | AV634378 | HC032f05  |   |   | 17.5  | 15.9  | 14.5  | 0.9 | 0.1 | 1.1 | 0.1 |
| 6190 | 154h05 | AV631182 | LCL089h10 |   |   | 7.6   | 7.1   | 6.7   | 1.0 | 0.2 | 1.1 | 0.2 |
| 6191 | 033g01 | BP094781 | MXL029e08 |   |   | 12.7  | 11.3  | 10.8  | 0.9 | 0.1 | 1.1 | 0.3 |
| 6192 | 137f04 | AV621748 | LCO40d10  |   |   | 12.2  | 8.9   | 8.2   | 0.7 | 0.2 | 1.1 | 0.1 |
| 6193 | 021b11 | AV622080 | LCO44g06  |   |   | 179.6 | 138.9 | 141.3 | 0.8 | 0.1 | 1.1 | 0.5 |
| 6194 | 135c02 | AV619869 | LCO13g07  |   |   | 8.8   | 8.4   | 8.3   | 1.0 | 0.4 | 1.1 | 0.5 |
| 6195 | 016f03 | AV642356 | HCL050d02 |   |   | 5.3   | 6.0   | 5.6   | 1.5 | 0.7 | 1.1 | 0.3 |
| 6196 | 110d05 | AV389216 | CM035f07  |   |   | 4.7   | 4.6   | 4.3   | 1.0 | 0.3 | 1.1 | 0.3 |
| 6197 | 122f07 | AV638651 | HC089a09  |   |   | 10.7  | 8.0   | 7.7   | 0.7 | 0.1 | 1.1 | 0.4 |
| 6198 | 114h03 | AV389978 | CM081g05  |   |   | 22.6  | 19.8  | 18.4  | 0.9 | 0.2 | 1.1 | 0.1 |
| 6199 | 128e05 | AV642420 | HCL051e04 |   |   | 9.2   | 8.5   | 8.2   | 1.0 | 0.2 | 1.1 | 0.3 |
| 6200 | 113c12 | AV392997 | CM066f09  |   |   | 14.1  | 13.3  | 12.1  | 1.0 | 0.3 | 1.1 | 0.2 |
| 6201 | 121f07 | AV637358 | HC072b05  |   |   | 12.1  | 10.8  | 9.9   | 1.0 | 0.3 | 1.1 | 0.1 |
| 6202 | 015h01 | AV641453 | HCL033h10 |   |   | 7.5   | 8.5   | 8.6   | 1.2 | 0.4 | 1.1 | 0.4 |
| 6203 | 112d03 | AV391774 | CM056b03  |   |   | 7.3   | 10.0  | 9.2   |     |     |     |     |

|      | A      | B        | C         | D | E | F     | G     | H     | I   | J   | K   | L   |
|------|--------|----------|-----------|---|---|-------|-------|-------|-----|-----|-----|-----|
| 6204 | 158f05 | BP087674 | MX041b06  |   |   | 8.9   | 11.8  | 11.3  | 1.3 | 0.6 | 1.1 | 0.6 |
| 6205 | 133a06 | AV644921 | HCL095e09 |   |   | 7.5   | 5.8   | 5.3   | 0.9 | 0.3 | 1.1 | 0.2 |
| 6206 | 121f02 | AV637304 | HC071d07  |   |   | 224.0 | 259.0 | 253.9 | 1.2 | 0.1 | 1.1 | 0.4 |
| 6207 | 002d11 | AV395377 | CL40d12   |   |   | 4.0   | 4.3   | 4.0   | 1.1 | 0.2 | 1.1 | 0.1 |
| 6208 | 006f06 | AV390257 | CM044f05  |   |   | 6.7   | 7.6   | 7.1   | 1.2 | 0.5 | 1.1 | 0.3 |
| 6209 | 142e07 | AV625231 | LC089f06  |   |   | 35.9  | 31.6  | 29.3  | 1.0 | 0.3 | 1.1 | 0.3 |
| 6210 | 163f08 | BP094420 | MXL022g11 |   |   | 5.3   | 5.8   | 6.4   | 1.1 | 0.5 | 1.1 | 0.8 |
| 6211 | 108e06 | AV397433 | CM020b11  |   |   | 6.6   | 5.5   | 5.2   | 0.8 | 0.1 | 1.1 | 0.2 |
| 6212 | 117e12 | AV632824 | HC013a10  |   |   | 5.0   | 4.7   | 4.3   | 1.0 | 0.3 | 1.1 | 0.3 |
| 6213 | 168c07 | BP096388 | MXL058a04 |   |   | 10.0  | 13.6  | 12.5  | 1.3 | 0.3 | 1.1 | 0.4 |
| 6214 | 009f11 | AV392507 | CM097a08  |   |   | 3.8   | 4.8   | 4.5   | 1.2 | 0.4 | 1.1 | 0.6 |
| 6215 | 122a07 | AV637803 | HC077f11  |   |   | 11.0  | 12.4  | 12.1  | 1.1 | 0.1 | 1.1 | 0.4 |
| 6216 | 113b05 | AV392804 | CM064c07  |   |   | 9.4   | 9.9   | 9.2   | 1.1 | 0.1 | 1.1 | 0.2 |
| 6217 | 104g08 | AV396005 | CL53h10   |   |   | 9.0   | 10.8  | 9.8   | 1.2 | 0.1 | 1.1 | 0.2 |
| 6218 | 107b08 | AV386806 | CM007e03  |   |   | 7.0   | 7.3   | 7.3   | 1.1 | 0.1 | 1.1 | 0.4 |
| 6219 | 155h07 | AV631648 | LCL097e10 |   |   | 6.7   | 4.6   | 5.8   | 0.7 | 0.5 | 1.1 | 1.1 |
| 6220 | 102h06 | AV394651 | CL29f02   |   |   | 60.4  | 65.0  | 58.0  | 1.1 | 0.6 | 1.1 | 0.3 |
| 6221 | 148e08 | AV628062 | LCL036b04 |   |   | 9.3   | 8.3   | 7.7   | 0.9 | 0.1 | 1.1 | 0.2 |
| 6222 | 005b07 | AV397465 | CM020c12  |   |   | 6.4   | 7.4   | 6.9   | 1.1 | 0.1 | 1.1 | 0.2 |
| 6223 | 170f05 | BP097508 | MXL077a07 |   |   | 13.7  | 12.9  | 12.3  | 0.9 | 0.2 | 1.1 | 0.5 |
| 6224 | 101c11 | AV393378 | CL04g11   |   |   | 9.6   | 10.4  | 11.3  | 1.1 | 0.3 | 1.1 | 0.7 |
| 6225 | 165d10 | BP095202 | MXL037h05 |   |   | 93.9  | 90.0  | 83.0  | 1.1 | 0.5 | 1.1 | 0.0 |
| 6226 | 126g05 | AV641449 | HCL033h02 |   |   | 20.7  | 19.7  | 18.6  | 1.0 | 0.3 | 1.1 | 0.2 |
| 6227 | 014f03 | AV640206 | HCL012b05 |   |   | 4.8   | 6.1   | 6.1   | 1.4 | 0.5 | 1.1 | 0.5 |
| 6228 | 130d04 | AV643418 | HCL069d04 |   |   | 12.9  | 15.2  | 14.1  | 1.2 | 0.2 | 1.1 | 0.1 |
| 6229 | 142c07 | AV625043 | LC087a12  |   |   | 9.5   | 8.2   | 7.8   | 0.8 | 0.2 | 1.1 | 0.5 |
| 6230 | 110e11 | AV389481 | CM037a11  |   |   | 44.3  | 53.9  | 49.6  | 1.3 | 0.4 | 1.1 | 0.0 |
| 6231 | 034h02 | BP096335 | MXL057a06 |   |   | 3.8   | 4.1   | 5.1   | 1.1 | 0.2 | 1.1 | 0.8 |
| 6232 | 124d09 | AV640140 | HCL011b04 |   |   | 27.2  | 19.6  | 18.9  | 0.7 | 0.1 | 1.1 | 0.3 |
| 6233 | 149h01 | AV628689 | LCL045f07 |   |   | 11.4  | 10.1  | 9.5   | 0.9 | 0.1 | 1.1 | 0.1 |
| 6234 | 138h01 | AV622603 | LC051g11  |   |   | 25.6  | 21.3  | 19.8  | 1.0 | 0.3 | 1.1 | 0.1 |
| 6235 | 105h11 | AV397025 | CL72f03   |   |   | 9.6   | 8.6   | 7.9   | 0.9 | 0.1 | 1.1 | 0.1 |
| 6236 | 024c12 | AV626494 | LCL010b03 |   |   | 11.7  | 11.5  | 10.7  | 1.0 | 0.1 | 1.1 | 0.1 |
| 6237 | 022f11 | AV624118 | LC073b10  |   |   | 12.8  | 13.1  | 12.1  | 1.1 | 0.3 | 1.1 | 0.1 |
| 6238 | 011a09 | AV634132 | HC029f09  |   |   | 32.4  | 32.1  | 30.7  | 1.0 | 0.2 | 1.1 | 0.3 |
| 6239 | 033h01 | BP094982 | MXL033g08 |   |   | 8.8   | 9.9   | 9.3   | 1.2 | 0.3 | 1.1 | 0.1 |
| 6240 | 117h01 | AV633196 | HC017h07  |   |   | 77.8  | 91.0  | 84.3  | 1.3 | 0.6 | 1.1 | 0.0 |
| 6241 | 156d11 | BP086112 | MX002b08  |   |   | 20.9  | 16.1  | 15.3  | 0.8 | 0.2 | 1.1 | 0.4 |
| 6242 | 010g01 | AV633440 | HC020g11  |   |   | 6.0   | 8.7   | 8.0   | 1.5 | 0.2 | 1.1 | 0.3 |
| 6243 | 120a12 | AV635706 | HC049g12  |   |   | 59.9  | 59.3  | 53.3  | 1.0 | 0.3 | 1.1 | 0.2 |
| 6244 | 023d11 | AV625127 | LC088c03  |   |   | 16.8  | 13.6  | 12.8  | 0.8 | 0.1 | 1.1 | 0.3 |
| 6245 | 106f09 | AV397860 | CM002f05  |   |   | 4.6   | 4.6   | 4.3   | 1.0 | 0.2 | 1.1 | 0.2 |
| 6246 | 144c05 | AV626201 | LCL004b09 |   |   | 33.8  | 48.7  | 48.7  | 1.4 | 0.1 | 1.1 | 0.4 |
| 6247 | 128h07 | AV642584 | HCL054c03 |   |   | 7.7   | 8.5   | 8.0   | 1.1 | 0.2 | 1.1 | 0.1 |
| 6248 | 153b05 | AV630329 | LCL077c11 |   |   | 141.3 | 124.4 | 126.2 | 0.9 | 0.2 | 1.1 | 0.6 |
| 6249 | 018c07 | AV644392 | HCL087g04 |   |   | 5.0   | 10.9  | 10.4  | 2.3 | 0.7 | 1.1 | 0.2 |
| 6250 | 130f06 | AV643616 | HCL072g11 |   |   | 7.8   | 7.2   | 6.7   | 1.0 | 0.2 | 1.1 | 0.1 |
| 6251 | 109g05 | AV388416 | CM029f01  |   |   | 7.6   | 6.9   | 6.3   | 0.9 | 0.1 | 1.1 | 0.2 |
| 6252 | 026c06 | AV628228 | LCL038g03 |   |   | 25.2  | 20.8  | 19.4  | 0.8 | 0.1 | 1.1 | 0.2 |
| 6253 | 113h04 | AV388327 | CM071a09  |   |   | 14.2  | 8.9   | 8.7   | 0.6 | 0.2 | 1.1 | 0.4 |
| 6254 | 125f03 | AV640715 | HCL021b12 |   |   | 6.3   | 11.7  | 10.9  | 1.9 | 0.3 | 1.1 | 0.1 |
| 6255 | 110h02 | AV389879 | CM040d02  |   |   | 7.4   | 11.3  | 10.6  | 1.5 | 0.2 | 1.1 | 0.3 |
| 6256 | 121f12 | AV637433 | HC073b02  |   |   | 5.4   | 5.6   | 5.4   | 1.0 | 0.2 | 1.1 | 0.3 |
| 6257 | 115h10 | AV391857 | CM093e08  |   |   | 64.1  | 63.0  | 58.5  | 1.0 | 0.2 | 1.1 | 0.2 |
| 6258 | 139c12 | AV623010 | LC057g04  |   |   | 6.0   | 6.7   | 6.3   | 1.1 | 0.2 | 1.1 | 0.2 |
| 6259 | 003b03 | AV396014 | CL55b10   |   |   | 4.3   | 4.1   | 4.1   | 1.0 | 0.3 | 1.1 | 0.4 |
| 6260 | 132f07 | AV644785 | HCL093g04 |   |   | 8.4   | 8.7   | 8.4   | 1.0 | 0.1 | 1.1 | 0.3 |
| 6261 | 105f11 | BP098618 | MXL096d04 |   |   | 5.9   | 6.0   | 5.8   | 1.0 | 0.1 | 1.1 | 0.4 |
| 6262 | 142a11 | AV624894 | LC084c02  |   |   | 7.8   | 5.6   | 5.5   | 0.7 | 0.2 | 1.1 | 0.2 |
| 6263 | 140d03 | AV623781 | LC068e08  |   |   | 9.3   | 8.0   | 7.7   | 0.9 | 0.2 | 1.1 | 0.3 |
| 6264 | 111a11 | AV390177 | CM043b04  |   |   | 6.2   | 7.7   | 7.5   | 1.3 | 0.2 | 1.1 | 0.3 |
| 6265 | 147a11 | AV627377 | LCL025h04 |   |   | 9.9   | 9.0   | 8.4   | 0.9 | 0.2 | 1.1 | 0.3 |
| 6266 | 109e03 | AV387611 | CM027b03  |   |   | 6.6   | 5.4   | 4.9   | 0.8 | 0.3 | 1.1 | 0.3 |
| 6267 | 022h05 | AV624351 | LC076e10  |   |   | 8.6   | 9.7   | 9.2   | 1.1 | 0.1 | 1.1 | 0.2 |
| 6268 | 117d06 | AV632626 | HC010e09  |   |   | 6.2   | 5.9   | 5.8   | 0.9 | 0.1 | 1.1 | 0.3 |
| 6269 | 106b08 | AV397058 | CL75f10   |   |   | 7.3   | 7.1   | 6.7   | 1.0 | 0.2 | 1.1 | 0.3 |
| 6270 | 116g03 | AV397951 | CS001h08  |   |   | 5.3   | 5.7   | 5.6   | 1.1 | 0.2 | 1.1 | 0.2 |
| 6271 | 170c07 | BP097337 | MXL074a12 |   |   | 4.3   | 3.8   | 4.0   | 0.9 | 0.1 | 1.1 | 0.4 |
| 6272 | 002e07 | AV395446 | CL42c02   |   |   | 12.9  | 19.2  | 17.4  | 1.4 | 0.2 | 1.1 | 0.5 |
| 6273 | 145b07 | AV626544 | LCL010h11 |   |   | 5.9   | 6.2   | 6.1   | 1.1 | 0.2 | 1.1 | 0.5 |
| 6274 | 032b05 | BP092980 | MXL001g04 |   |   | 10.0  | 6.7   | 6.8   | 0.7 | 0.1 | 1.1 | 0.5 |
| 6275 | 106h01 | AV386580 | CM003h04  |   |   | 3.3   | 4.1   | 3.8   | 1.3 | 0.2 | 1.1 | 0.1 |
| 6276 | 027g03 | AV629393 | LCL057h09 |   |   | 19.3  | 25.1  | 28.6  | 1.3 | 0.3 | 1.1 | 0.6 |
| 6277 | 103f11 | AV395391 | CL40f11   |   |   | 2.9   | 3.3   | 3.1   | 1.2 | 0.2 | 1.1 | 0.2 |
| 6278 | 146a07 | AV626967 | LCL019a10 |   |   | 17.5  | 21.9  | 20.3  | 1.3 | 0.1 | 1.1 | 0.1 |
| 6279 | 028d09 | AV629957 | LCL070a02 |   |   | 11.4  | 12.4  | 11.9  | 1.1 | 0.1 | 1.1 | 0.4 |
| 6280 | 160d11 | BP088625 | MX065b12  |   |   | 13.8  | 16.9  | 16.1  | 1.3 | 0.3 | 1.1 | 0.3 |
| 6281 | 145f04 | AV626783 | LCL015d03 |   |   | 5.6   | 5.5   | 5.2   | 1.1 | 0.4 | 1.1 | 0.3 |
| 6282 | 011e11 | AV635162 | HC042f12  |   |   | 17.2  | 22.9  | 20.8  | 1.3 | 0.4 | 1.1 | 0.5 |
| 6283 | 159c01 | BP087750 | MX042h02  |   |   | 9.4   | 23.0  | 21.6  | 2.6 | 1.3 | 1.1 | 0.1 |
| 6284 | 115h06 | AV391709 | CM093a11  |   |   | 9.1   | 9.7   | 8.7   | 1.0 | 0.2 | 1.1 | 0.2 |
| 6285 | 142d10 | AV625174 | LC088h04  |   |   | 7.8   | 10.3  | 9.7   | 1.4 | 0.2 | 1.1 | 0.2 |
| 6286 | 122d06 | AV638224 | HC083e06  |   |   | 14.2  | 17.6  | 16.4  | 1.2 | 0.1 | 1.1 | 0.1 |
| 6287 | 151e07 | AV629547 | LCL060g02 |   |   | 11.8  | 10.6  | 9.8   | 0.9 | 0.1 | 1.1 | 0.0 |
| 6288 | 124c07 | AV640086 | HCL010b01 |   |   | 14.5  | 12.1  | 11.3  | 0.8 | 0.2 | 1.1 | 0.1 |
| 6289 | 118h11 | AV634456 | HC033f03  |   |   | 5.5   | 4.7   | 5.0   | 0.9 | 0.3 | 1.1 | 0.5 |
| 6290 | 104c11 | AV395791 | CL48e09   |   |   | 4.9   | 3.9   | 3.7   | 0.8 | 0.2 | 1.1 | 0.2 |
| 6291 | 160e04 | BP088679 | MX066d04  |   |   | 4.7   | 4.9   | 5.9   | 1.0 | 0.2 | 1.1 | 0.8 |
| 6292 | 108g07 | AV387903 | CM021f06  |   |   | 11.1  | 11.0  | 9.9   | 1.0 | 0.4 | 1.1 | 0.4 |
| 6293 | 016d10 | AV642173 | HCL046g12 |   |   | 8.3   | 9.0   | 8.3   | 1.1 | 0.4 | 1.1 | 0.3 |
| 6294 | 137f02 | AV621737 | LC040c11  |   |   | 10.8  | 7.9   | 7.4   | 0.7 | 0.1 | 1.1 | 0.2 |
| 6295 | 014h03 | AV640479 | HCL017a05 |   |   | 111.1 | 130.7 | 127.0 | 1.3 | 0.3 | 1.1 | 0.3 |
| 6296 | 102b11 | AV394162 | CL19g06   |   |   | 19.5  | 22.2  | 20.8  | 1.2 | 0.3 | 1.1 | 0.3 |
| 6297 | 112a07 | AV391389 | CM053g09  |   |   | 13.5  | 14.1  | 13.9  | 1.1 | 0.1 | 1.1 | 0.4 |
| 6298 | 128e09 | AV642433 | HCL051f06 |   |   | 10.0  | 12.2  | 11.3  | 1.2 | 0.6 | 1.1 | 0.6 |
| 6299 | 112h04 | AV392352 | CM061b07  |   |   | 15.5  | 12.1  | 11.7  | 0.8 | 0.0 | 1.1 | 0.3 |
| 6300 | 002h04 | AV395747 | CL50f03   |   |   | 5.9   | 11.2  | 10.4  | 1.9 | 0.1 | 1.1 | 0.2 |
| 6301 | 108b11 | AV388170 | CM017b01  |   |   | 3.2   | 4.0   | 3.8   | 1.3 | 0.6 | 1.1 | 0.3 |
| 6302 | 124e11 | AV640196 | HCL011h12 |   |   | 9.7   | 10.4  | 9.8   | 1.1 | 0.3 | 1.1 | 0.1 |
| 6303 | 126h10 | AV641585 | HCL036g11 |   |   | 6.4   | 7.1   | 6.9   | 1.1 | 0.2 | 1.1 | 0.4 |
| 6304 | 016a08 | AV641643 | HCL037h12 |   |   | 1.2   | 1.1   | 1.5   | 1.0 | 0.3 | 1.1 | 0.7 |
| 6305 | 126d03 | BP098719 | MXL097h11 |   |   | 9.4   | 9.5   | 8.9   | 1.0 | 0.1 | 1.1 | 0.2 |
| 6306 | 108a01 | AV387412 | CM014e07  |   |   | 3.6   | 5.1   | 4.9   | 1.7 | 0.8 | 1.1 | 0.2 |
| 6307 | 021h06 | AV623021 | LC057h06  |   |   | 24.5  | 22.9  | 21.7  | 0.9 | 0.1 | 1.1 | 0.2 |
| 6308 | 124d05 | AV640125 | HCL010g09 |   |   | 9.0   | 7.9   | 7.6   | 0.9 | 0.2 | 1.1 | 0.2 |
| 6309 | 101h06 | AV394141 | CL17a02   |   |   | 5.0   | 5.1   | 5.2   | 1.0 | 0.2 | 1.1 | 0.5 |
| 6310 | 017d04 | AV643201 | HCL065e09 |   |   | 8.9   | 10.9  | 10.0  | 1.2 | 0.2 |     |     |

|      | A      | B        | C         | D | E | F     | G     | H     | I   | J   | K   | L   |
|------|--------|----------|-----------|---|---|-------|-------|-------|-----|-----|-----|-----|
| 6311 | 029c08 | AV630744 | LCL083f06 |   |   | 33.4  | 21.6  | 21.7  | 0.7 | 0.1 | 1.1 | 0.3 |
| 6312 | 111h10 | AV391273 | CM052e03  |   |   | 45.0  | 52.9  | 49.8  | 1.2 | 0.2 | 1.1 | 0.1 |
| 6313 | 141a03 | AV624196 | LC074c04  |   |   | 11.6  | 9.5   | 9.0   | 0.8 | 0.1 | 1.1 | 0.4 |
| 6314 | 115d08 | AV391100 | CM087c10  |   |   | 7.3   | 6.2   | 6.0   | 0.9 | 0.3 | 1.1 | 0.3 |
| 6315 | 144d04 | AV626239 | LCL004h08 |   |   | 25.9  | 39.4  | 36.3  | 1.5 | 0.4 | 1.1 | 0.2 |
| 6316 | 028a03 | AV629556 | LCL060h08 |   |   | 10.1  | 8.0   | 7.5   | 0.8 | 0.1 | 1.1 | 0.2 |
| 6317 | 006a10 | AV389006 | CM034c01  |   |   | 9.8   | 12.2  | 11.6  | 1.2 | 0.4 | 1.1 | 0.4 |
| 6318 | 030g04 | BP086130 | MX002e03  |   |   | 22.8  | 16.4  | 15.2  | 0.7 | 0.1 | 1.1 | 0.2 |
| 6319 | 114c05 | BP383681 | CM074h02  |   |   | 61.5  | 68.3  | 66.6  | 1.1 | 0.1 | 1.1 | 0.3 |
| 6320 | 015b12 | AV640826 | HCL023a07 |   |   | 6.2   | 5.2   | 4.9   | 0.8 | 0.1 | 1.1 | 0.2 |
| 6321 | 024h03 | AV626876 | LCL017b06 |   |   | 15.5  | 12.1  | 11.7  | 0.8 | 0.1 | 1.1 | 0.3 |
| 6322 | 110h08 | AV389944 | CM040h04  |   |   | 7.5   | 8.1   | 7.6   | 1.1 | 0.3 | 1.1 | 0.2 |
| 6323 | 126h06 | AV641543 | HCL035h09 |   |   | 10.2  | 10.1  | 9.5   | 1.0 | 0.2 | 1.1 | 0.1 |
| 6324 | 125c11 | AV640543 | HCL018a10 |   |   | 9.2   | 9.1   | 8.8   | 1.0 | 0.1 | 1.1 | 0.3 |
| 6325 | 126f03 | AV641362 | HCL032c08 |   |   | 28.3  | 27.0  | 25.4  | 1.0 | 0.2 | 1.1 | 0.1 |
| 6326 | 021e12 | AV622579 | LC051e07  |   |   | 6.8   | 7.4   | 6.8   | 1.1 | 0.2 | 1.1 | 0.3 |
| 6327 | 010g09 | AV633564 | HC022d01  |   |   | 10.5  | 12.7  | 12.7  | 1.2 | 0.4 | 1.1 | 0.6 |
| 6328 | 036e10 | BP098385 | MXL092e09 |   |   | 18.1  | 15.7  | 14.6  | 0.9 | 0.2 | 1.1 | 0.2 |
| 6329 | 115g07 | AV391458 | CM091b01  |   |   | 3.1   | 3.9   | 3.8   | 1.3 | 0.4 | 1.1 | 0.3 |
| 6330 | 026b05 | AV628119 | LCL037a04 |   |   | 20.2  | 18.7  | 17.5  | 1.0 | 0.3 | 1.1 | 0.1 |
| 6331 | 137h07 | AV621958 | LC043b10  |   |   | 64.9  | 35.3  | 35.7  | 0.5 | 0.0 | 1.1 | 0.4 |
| 6332 | 148c10 | AV627956 | LCL034d12 |   |   | 11.0  | 13.7  | 13.1  | 1.3 | 0.4 | 1.1 | 0.3 |
| 6333 | 150c07 | AV628935 | LCL049c01 |   |   | 35.1  | 30.4  | 29.5  | 0.9 | 0.2 | 1.1 | 0.4 |
| 6334 | 027e02 | AV629215 | LCL054e10 |   |   | 9.6   | 6.5   | 7.8   | 0.7 | 0.1 | 1.1 | 0.7 |
| 6335 | 110g02 | AV389728 | CM039e03  |   |   | 28.0  | 26.6  | 27.3  | 1.0 | 0.3 | 1.1 | 0.3 |
| 6336 | 003h05 | AV397208 | CL78h07   |   |   | 3.6   | 3.0   | 3.0   | 1.0 | 0.5 | 1.1 | 0.3 |
| 6337 | 103h04 | AV395493 | CL42f10   |   |   | 5.7   | 6.7   | 6.5   | 1.2 | 0.2 | 1.1 | 0.2 |
| 6338 | 009e12 | AV392083 | CM094e07  |   |   | 13.9  | 12.9  | 12.2  | 0.9 | 0.1 | 1.1 | 0.2 |
| 6339 | 135g06 | AV620220 | LC019b11  |   |   | 6.9   | 9.0   | 8.2   | 1.3 | 0.3 | 1.1 | 0.3 |
| 6340 | 128g06 | AV642514 | HCL053b04 |   |   | 15.6  | 14.0  | 13.8  | 0.9 | 0.1 | 1.1 | 0.3 |
| 6341 | 149d10 | AV628484 | LCL042f02 |   |   | 26.0  | 32.0  | 32.8  | 1.2 | 0.1 | 1.1 | 0.3 |
| 6342 | 011b09 | AV634396 | HC032h01  |   |   | 5.9   | 6.7   | 6.2   | 1.1 | 0.2 | 1.1 | 0.2 |
| 6343 | 159e10 | BP087858 | MX045b02  |   |   | 42.0  | 37.0  | 34.4  | 0.9 | 0.1 | 1.1 | 0.1 |
| 6344 | 017b06 | AV642994 | HCL061h03 |   |   | 15.9  | 23.2  | 22.2  | 1.5 | 0.3 | 1.1 | 0.2 |
| 6345 | 152d07 | AV629962 | LCL070b01 |   |   | 9.6   | 14.5  | 12.8  | 1.4 | 0.5 | 1.1 | 0.4 |
| 6346 | 120d01 | AV635957 | HC053c09  |   |   | 7.3   | 7.0   | 6.5   | 1.0 | 0.2 | 1.1 | 0.1 |
| 6347 | 150e10 | AV629052 | LCL051a03 |   |   | 8.0   | 8.0   | 7.6   | 1.0 | 0.3 | 1.1 | 0.2 |
| 6348 | 124d04 | AV640117 | HCL010f11 |   |   | 10.8  | 11.5  | 11.0  | 1.1 | 0.3 | 1.1 | 0.3 |
| 6349 | 108c02 | AV388188 | CM017d05  |   |   | 15.8  | 23.6  | 22.1  | 1.6 | 0.4 | 1.1 | 0.0 |
| 6350 | 146a05 | AV626958 | LCL018g12 |   |   | 41.4  | 37.4  | 39.0  | 0.9 | 0.1 | 1.1 | 0.4 |
| 6351 | 125h06 | AV640838 | HCL023b11 |   |   | 9.8   | 11.2  | 10.5  | 1.2 | 0.1 | 1.1 | 0.1 |
| 6352 | 132c07 | AV644623 | HCL091d05 |   |   | 11.5  | 11.9  | 11.4  | 1.0 | 0.1 | 1.1 | 0.2 |
| 6353 | 167d01 | BP095996 | MXL050g05 |   |   | 9.2   | 8.5   | 8.8   | 0.9 | 0.2 | 1.1 | 0.4 |
| 6354 | 032d02 | BP093176 | MXL004f03 |   |   | 13.4  | 9.5   | 10.3  | 0.7 | 0.0 | 1.1 | 0.5 |
| 6355 | 135e05 | AV620015 | LC016c08  |   |   | 18.8  | 22.0  | 20.9  | 1.2 | 0.5 | 1.1 | 0.3 |
| 6356 | 019g06 | AV620253 | LC019f04  |   |   | 34.4  | 35.5  | 34.3  | 1.1 | 0.4 | 1.1 | 0.4 |
| 6357 | 129a05 | AV642631 | HCL055b01 |   |   | 25.2  | 26.7  | 26.2  | 1.0 | 0.2 | 1.1 | 0.4 |
| 6358 | 121c06 | BP383710 | HC067b09  |   |   | 63.9  | 53.9  | 55.2  | 0.8 | 0.0 | 1.1 | 0.4 |
| 6359 | 133h11 | AV645295 | HCL100g04 |   |   | 6.8   | 5.7   | 5.4   | 0.9 | 0.3 | 1.1 | 0.2 |
| 6360 | 145g04 | AV626835 | LCL016c06 |   |   | 10.4  | 11.9  | 12.1  | 1.2 | 0.2 | 1.1 | 0.4 |
| 6361 | 147h07 | AV627749 | LCL031d12 |   |   | 10.1  | 9.9   | 10.9  | 1.0 | 0.3 | 1.1 | 0.5 |
| 6362 | 101c10 | AV393385 | CL04e05   |   |   | 55.8  | 60.6  | 56.6  | 1.1 | 0.2 | 1.1 | 0.0 |
| 6363 | 129d07 | AV642836 | HCL059a02 |   |   | 16.5  | 17.0  | 16.3  | 1.0 | 0.1 | 1.1 | 0.2 |
| 6364 | 152f04 | AV630040 | LCL071g09 |   |   | 33.1  | 24.3  | 23.8  | 0.7 | 0.1 | 1.1 | 0.3 |
| 6365 | 152d05 | AV629951 | LCL069g09 |   |   | 3.8   | 4.0   | 3.7   | 1.1 | 0.1 | 1.1 | 0.1 |
| 6366 | 030e04 | AV631695 | LCL098d02 |   |   | 18.8  | 16.8  | 15.8  | 0.9 | 0.1 | 1.1 | 0.1 |
| 6367 | 101a10 | AV393345 | CL01e04   |   |   | 72.5  | 92.1  | 90.7  | 1.3 | 0.4 | 1.1 | 0.5 |
| 6368 | 130h10 | AV643751 | HCL075d04 |   |   | 9.3   | 8.7   | 8.1   | 1.0 | 0.1 | 1.1 | 0.3 |
| 6369 | 009g09 | AV393291 | CM099e12  |   |   | 12.8  | 13.1  | 12.3  | 1.0 | 0.2 | 1.1 | 0.4 |
| 6370 | 143f01 | AV625816 | LC098c06  |   |   | 7.7   | 8.1   | 7.6   | 1.1 | 0.2 | 1.1 | 0.1 |
| 6371 | 019b02 | AV619558 | LC010a03  |   |   | 24.7  | 15.1  | 14.6  | 0.6 | 0.3 | 1.1 | 0.2 |
| 6372 | 108g02 | AV387976 | CM021d08  |   |   | 11.7  | 12.5  | 11.8  | 1.1 | 0.3 | 1.1 | 0.1 |
| 6373 | 124h06 | AV640338 | HCL014e01 |   |   | 7.7   | 7.8   | 7.4   | 1.0 | 0.2 | 1.1 | 0.2 |
| 6374 | 130c05 | AV643329 | HCL067f08 |   |   | 19.3  | 20.6  | 19.4  | 1.1 | 0.1 | 1.1 | 0.2 |
| 6375 | 152g05 | AV630104 | LCL073b08 |   |   | 10.5  | 9.9   | 9.3   | 0.9 | 0.2 | 1.1 | 0.1 |
| 6376 | 131a09 | AV643840 | HCL077a05 |   |   | 20.6  | 23.2  | 21.7  | 1.2 | 0.4 | 1.1 | 0.2 |
| 6377 | 111d08 | AV390673 | CM047c05  |   |   | 11.0  | 11.8  | 11.4  | 1.1 | 0.2 | 1.1 | 0.3 |
| 6378 | 152h04 | AV630225 | LCL075f08 |   |   | 342.5 | 354.3 | 348.2 | 1.0 | 0.1 | 1.1 | 0.4 |
| 6379 | 151h10 | AV629730 | LCL064h06 |   |   | 23.7  | 21.8  | 20.4  | 0.9 | 0.0 | 1.1 | 0.2 |
| 6380 | 150f09 | AV629108 | LCL052b08 |   |   | 13.0  | 13.1  | 12.0  | 1.0 | 0.1 | 1.1 | 0.2 |
| 6381 | 103d06 | AV395135 | CL36c04   |   |   | 109.7 | 95.8  | 88.8  | 1.1 | 0.7 | 1.1 | 0.1 |
| 6382 | 145a11 | AV626491 | LCL010a11 |   |   | 9.5   | 9.7   | 9.6   | 1.0 | 0.4 | 1.1 | 0.3 |
| 6383 | 025e09 | AV627498 | LCL027f07 |   |   | 12.2  | 9.5   | 9.1   | 0.8 | 0.1 | 1.1 | 0.3 |
| 6384 | 023d09 | AV624492 | LC078e01  |   |   | 23.0  | 66.4  | 62.8  | 2.9 | 0.3 | 1.1 | 0.2 |
| 6385 | 156f08 | BP086272 | MX005e03  |   |   | 44.9  | 35.8  | 33.1  | 0.8 | 0.1 | 1.1 | 0.1 |
| 6386 | 117f12 | AV633030 | HC015h01  |   |   | 4.0   | 4.5   | 4.3   | 1.1 | 0.1 | 1.1 | 0.2 |
| 6387 | 123f04 | AV639659 | HCL002e12 |   |   | 5.5   | 5.6   | 5.4   | 1.0 | 0.2 | 1.1 | 0.3 |
| 6388 | 027h04 | AV629462 | LCL059b08 |   |   | 3.3   | 4.0   | 3.7   | 1.4 | 0.9 | 1.1 | 0.4 |
| 6389 | 158g01 | BP087688 | MX041e04  |   |   | 6.6   | 5.5   | 6.4   | 1.1 | 0.9 | 1.1 | 0.9 |
| 6390 | 114b04 | AV389051 | CM073g02  |   |   | 12.3  | 12.9  | 11.6  | 1.0 | 0.5 | 1.1 | 0.2 |
| 6391 | 025b05 | AV627130 | LCL021f02 |   |   | 9.2   | 14.5  | 13.6  | 1.6 | 0.2 | 1.1 | 0.1 |
| 6392 | 127e12 | AV641892 | HCL042a01 |   |   | 8.1   | 8.4   | 8.0   | 1.0 | 0.2 | 1.1 | 0.3 |
| 6393 | 008d07 | AV387653 | CM069e02  |   |   | 22.7  | 19.6  | 19.2  | 0.9 | 0.1 | 1.1 | 0.3 |
| 6394 | 114a05 | AV388759 | CM072c06  |   |   | 5.8   | 5.7   | 5.4   | 1.0 | 0.2 | 1.1 | 0.1 |
| 6395 | 163d06 | BP094254 | MXL020b07 |   |   | 9.5   | 8.6   | 8.1   | 0.9 | 0.1 | 1.1 | 0.0 |
| 6396 | 104b10 | AV397773 | CL45e02   |   |   | 4.3   | 4.7   | 5.1   | 1.2 | 0.4 | 1.1 | 0.5 |
| 6397 | 030e10 | AV631767 | LCL099e01 |   |   | 13.3  | 10.0  | 10.7  | 0.8 | 0.2 | 1.1 | 0.5 |
| 6398 | 108b08 | AV387450 | CM016h09  |   |   | 4.5   | 4.8   | 4.6   | 1.1 | 0.1 | 1.1 | 0.2 |
| 6399 | 017b12 | AV643090 | HCL063e10 |   |   | 17.5  | 12.3  | 14.1  | 0.7 | 0.2 | 1.1 | 0.6 |
| 6400 | 103c10 | AV394899 | CL34f11   |   |   | 8.5   | 8.1   | 7.5   | 1.0 | 0.3 | 1.1 | 0.2 |
| 6401 | 031a02 | BP086342 | MX007a03  |   |   | 14.7  | 16.5  | 15.1  | 1.2 | 0.5 | 1.1 | 0.2 |
| 6402 | 118g06 | AV634196 | HC030d06  |   |   | 5.9   | 5.3   | 5.0   | 1.0 | 0.3 | 1.1 | 0.3 |
| 6403 | 109h09 | AV388671 | CM031d01  |   |   | 182.1 | 207.8 | 193.1 | 1.1 | 0.0 | 1.1 | 0.1 |
| 6404 | 015e04 | AV641141 | HCL028d09 |   |   | 13.2  | 16.7  | 16.5  | 1.3 | 0.1 | 1.1 | 0.3 |
| 6405 | 119d05 | AV635005 | HC040g01  |   |   | 72.4  | 55.0  | 57.9  | 0.7 | 0.1 | 1.1 | 0.6 |
| 6406 | 155d10 | AV631422 | LCL093f07 |   |   | 20.2  | 25.2  | 24.5  | 1.3 | 0.1 | 1.1 | 0.2 |
| 6407 | 111e06 | AV390804 | CM048d12  |   |   | 34.3  | 32.8  | 33.9  | 1.0 | 0.2 | 1.1 | 0.4 |
| 6408 | 172c10 | BP098323 | MXL091e06 |   |   | 13.4  | 14.2  | 13.3  | 1.0 | 0.3 | 1.1 | 0.2 |
| 6409 | 145a09 | AV626473 | LCL009g02 |   |   | 14.5  | 10.0  | 9.6   | 0.7 | 0.2 | 1.1 | 0.3 |
| 6410 | 003h11 | AV397345 | CL80h06   |   |   | 4.5   | 4.8   | 5.1   | 1.1 | 0.3 | 1.1 | 0.6 |
| 6411 | 031g03 | BP087311 | MX031d10  |   |   | 17.1  | 19.9  | 18.8  | 1.2 | 0.2 | 1.1 | 0.2 |
| 6412 | 134g09 | AV619530 | LC009f02  |   |   | 22.4  | 18.2  | 17.1  | 0.8 | 0.1 | 1.1 | 0.2 |
| 6413 | 127e11 | AV641885 | HCL041h03 |   |   | 6.3   | 6.9   | 6.6   | 1.1 | 0.1 | 1.1 | 0.2 |
| 6414 | 110f09 | AV389675 | CM039a02  |   |   | 8.8   | 11.2  | 10.6  | 1.3 | 0.3 | 1.1 | 0.2 |
| 6415 | 030g07 | BP086154 | MX002h08  |   |   | 11.5  | 6.7   | 6.6   | 0.6 | 0.2 | 1.1 | 0.3 |
| 6416 | 006a04 | AV388800 | CM032f09  |   |   | 18.5  | 17.8  | 17.0  | 1.0 | 0.1 | 1.1 | 0.3 |
| 6417 | 156e04 | BP086155 | MX        |   |   |       |       |       |     |     |     |     |



|      | A      | B        | C         | D | E | F     | G     | H     | I   | J   | K   | L   |
|------|--------|----------|-----------|---|---|-------|-------|-------|-----|-----|-----|-----|
| 6418 | 124h07 | AV640339 | HCL014e04 |   |   | 12.2  | 13.2  | 14.3  | 1.1 | 0.2 | 1.1 | 0.6 |
| 6419 | 157h07 | BP087281 | MX030e03  |   |   | 11.9  | 8.5   | 15.5  | 0.7 | 0.6 | 1.1 | 1.2 |
| 6420 | 022b01 | AV623412 | LC063d08  |   |   | 8.1   | 15.4  | 14.6  | 1.9 | 0.5 | 1.1 | 0.2 |
| 6421 | 029a07 | AV630504 | LCL079h04 |   |   | 20.0  | 15.8  | 14.9  | 0.8 | 0.1 | 1.1 | 0.1 |
| 6422 | 107e09 | AV387012 | CM010f09  |   |   | 10.4  | 12.5  | 11.6  | 1.2 | 0.1 | 1.1 | 0.1 |
| 6423 | 148b11 | AV627875 | LCL033c01 |   |   | 19.3  | 20.4  | 19.8  | 1.1 | 0.1 | 1.1 | 0.2 |
| 6424 | 115e10 | AV391193 | CM089c09  |   |   | 257.7 | 304.0 | 285.7 | 1.2 | 0.1 | 1.1 | 0.1 |
| 6425 | 122e05 | AV638486 | HC087a02  |   |   | 21.9  | 19.1  | 21.1  | 0.9 | 0.1 | 1.1 | 0.5 |
| 6426 | 035h10 | BP097550 | MXL077f03 |   |   | 7.5   | 8.7   | 8.3   | 1.2 | 0.4 | 1.1 | 0.1 |
| 6427 | 013h11 | AV639652 | HCL002d10 |   |   | 10.5  | 7.8   | 7.3   | 0.7 | 0.2 | 1.1 | 0.4 |
| 6428 | 141f08 | AV624661 | LC080h05  |   |   | 14.4  | 20.3  | 19.9  | 1.6 | 0.6 | 1.1 | 0.2 |
| 6429 | 115d11 | AV390937 | CM088d10  |   |   | 6.0   | 5.6   | 5.3   | 0.9 | 0.1 | 1.1 | 0.2 |
| 6430 | 109b10 | AV388232 | CM024f08  |   |   | 10.0  | 10.4  | 10.0  | 1.1 | 0.2 | 1.1 | 0.3 |
| 6431 | 016d07 | AV642122 | HCL045h11 |   |   | 26.1  | 40.6  | 38.4  | 1.6 | 0.3 | 1.1 | 0.1 |
| 6432 | 011b04 | AV634371 | HC032e09  |   |   | 8.8   | 11.9  | 11.2  | 1.4 | 0.2 | 1.1 | 0.1 |
| 6433 | 116d07 | AV392969 | CM099b01  |   |   | 58.9  | 79.4  | 74.8  | 1.4 | 0.1 | 1.1 | 0.0 |
| 6434 | 136h06 | AV620979 | LC029e04  |   |   | 7.6   | 7.6   | 10.3  | 1.0 | 0.2 | 1.1 | 0.8 |
| 6435 | 018c02 | AV644309 | HCL086a07 |   |   | 18.1  | 19.4  | 18.4  | 1.1 | 0.2 | 1.1 | 0.2 |
| 6436 | 134a11 | AV618980 | LC002b09  |   |   | 67.6  | 41.1  | 40.4  | 0.6 | 0.1 | 1.1 | 0.5 |
| 6437 | 153f02 | AV630560 | LCL080g04 |   |   | 16.8  | 17.0  | 15.9  | 1.0 | 0.1 | 1.1 | 0.2 |
| 6438 | 113a03 | AV392623 | CM062g04  |   |   | 8.2   | 6.1   | 5.9   | 0.8 | 0.4 | 1.1 | 0.1 |
| 6439 | 028b03 | AV629611 | LCL061h11 |   |   | 10.6  | 8.7   | 8.6   | 0.8 | 0.1 | 1.1 | 0.3 |
| 6440 | 002d06 | AV395184 | CL39e03   |   |   | 6.6   | 8.3   | 7.9   | 1.3 | 0.1 | 1.1 | 0.1 |
| 6441 | 116g06 | AV631883 | HC001c05  |   |   | 4.1   | 2.9   | 3.1   | 0.7 | 0.1 | 1.1 | 0.7 |
| 6442 | 113e04 | AV393211 | CM068c12  |   |   | 247.4 | 257.4 | 228.2 | 1.0 | 0.4 | 1.1 | 0.3 |
| 6443 | 142c12 | AV625092 | LC087g07  |   |   | 8.3   | 8.4   | 8.1   | 1.0 | 0.1 | 1.1 | 0.3 |
| 6444 | 001a09 | AV397632 | CL02g06   |   |   | 25.9  | 27.1  | 26.8  | 1.0 | 0.2 | 1.1 | 0.5 |
| 6445 | 102b09 | AV394186 | CL19g03   |   |   | 3.2   | 2.9   | 2.8   | 1.0 | 0.2 | 1.1 | 0.2 |
| 6446 | 133d03 | BP383772 | HCL097c12 |   |   | 5.7   | 4.9   | 4.8   | 0.9 | 0.3 | 1.1 | 0.4 |
| 6447 | 102e07 | AV394491 | CL23d11   |   |   | 4.2   | 4.0   | 3.8   | 1.0 | 0.3 | 1.1 | 0.2 |
| 6448 | 144e02 | AV626261 | LCL005d05 |   |   | 121.9 | 71.9  | 73.0  | 0.6 | 0.4 | 1.1 | 0.8 |
| 6449 | 110b02 | AV388894 | CM033f02  |   |   | 6.2   | 5.8   | 5.5   | 1.1 | 0.4 | 1.1 | 0.1 |
| 6450 | 150b12 | AV628920 | LCL049a05 |   |   | 7.2   | 7.8   | 7.3   | 1.1 | 0.2 | 1.1 | 0.1 |
| 6451 | 141a07 | AV624243 | LC075a02  |   |   | 24.3  | 29.5  | 27.2  | 1.2 | 0.3 | 1.1 | 0.1 |
| 6452 | 167d04 | BP096013 | MXL051a09 |   |   | 30.2  | 29.5  | 28.0  | 1.0 | 0.1 | 1.1 | 0.1 |
| 6453 | 164f03 | BP094821 | MXL030d03 |   |   | 8.0   | 8.6   | 8.6   | 1.1 | 0.5 | 1.1 | 0.5 |
| 6454 | 131e05 | BP383752 | HCL083b12 |   |   | 10.6  | 10.7  | 10.3  | 1.0 | 0.3 | 1.1 | 0.1 |
| 6455 | 105c03 | AV396361 | CL60c06   |   |   | 9.9   | 6.8   | 6.5   | 0.8 | 0.2 | 1.1 | 0.2 |
| 6456 | 016d12 | AV642236 | HCL048a10 |   |   | 2.6   | 2.4   | 2.8   | 0.9 | 0.2 | 1.1 | 0.7 |
| 6457 | 131c06 | AV643992 | HCL079g07 |   |   | 10.0  | 11.7  | 11.2  | 1.2 | 0.1 | 1.1 | 0.2 |
| 6458 | 119f02 | AV635200 | HC043c04  |   |   | 20.4  | 14.7  | 14.0  | 0.7 | 0.1 | 1.1 | 0.3 |
| 6459 | 138g12 | AV622587 | LC051f03  |   |   | 7.3   | 7.0   | 7.0   | 1.0 | 0.4 | 1.1 | 0.4 |
| 6460 | 014c11 | AV639921 | HCL007c05 |   |   | 6.3   | 5.4   | 5.1   | 0.8 | 0.1 | 1.1 | 0.1 |
| 6461 | 145a01 | AV626450 | LCL009c08 |   |   | 21.1  | 18.6  | 17.3  | 0.9 | 0.1 | 1.1 | 0.1 |
| 6462 | 142a07 | AV624882 | LC084a09  |   |   | 8.2   | 5.6   | 5.3   | 0.7 | 0.1 | 1.1 | 0.2 |
| 6463 | 168h01 | BP096711 | MXL063e06 |   |   | 10.0  | 7.3   | 8.7   | 0.6 | 0.4 | 1.1 | 1.0 |
| 6464 | 137f06 | AV621769 | LC040g01  |   |   | 6.8   | 5.1   | 4.9   | 0.8 | 0.4 | 1.1 | 0.2 |
| 6465 | 132f11 | AV644795 | HCL093h06 |   |   | 3.5   | 4.6   | 4.4   | 1.3 | 0.4 | 1.1 | 0.3 |
| 6466 | 126h12 | AV641597 | HCL037b01 |   |   | 30.4  | 31.7  | 30.5  | 1.0 | 0.1 | 1.1 | 0.2 |
| 6467 | 102f11 | AV394576 | CL26g02   |   |   | 3.0   | 3.2   | 3.1   | 1.1 | 0.2 | 1.1 | 0.2 |
| 6468 | 101e01 | AV393500 | CL08h01   |   |   | 3.0   | 4.2   | 4.0   | 1.6 | 0.5 | 1.1 | 0.3 |
| 6469 | 025d03 | AV627300 | LCL024f06 |   |   | 33.7  | 19.6  | 18.4  | 0.6 | 0.2 | 1.1 | 0.1 |
| 6470 | 013a09 | AV637846 | HC078d06  |   |   | 3.0   | 3.7   | 3.6   | 1.2 | 0.1 | 1.1 | 0.3 |
| 6471 | 130a06 | BP383741 | HCL065h03 |   |   | 23.6  | 23.9  | 22.8  | 1.0 | 0.2 | 1.1 | 0.2 |
| 6472 | 023h05 | AV626206 | LCL004c05 |   |   | 12.2  | 9.4   | 8.9   | 0.8 | 0.1 | 1.1 | 0.1 |
| 6473 | 149a09 | AV628329 | LCL040b09 |   |   | 13.3  | 10.9  | 10.6  | 0.8 | 0.1 | 1.1 | 0.4 |
| 6474 | 172f06 | BP098470 | MXL093g10 |   |   | 21.6  | 17.0  | 16.4  | 0.8 | 0.2 | 1.1 | 0.3 |
| 6475 | 006d01 | AV389708 | CM039c05  |   |   | 5.9   | 7.4   | 7.0   | 1.2 | 0.1 | 1.1 | 0.1 |
| 6476 | 118d06 | AV633736 | HC024f05  |   |   | 5.1   | 3.5   | 3.5   | 0.7 | 0.1 | 1.1 | 0.3 |
| 6477 | 117e04 | AV632779 | HC012e03  |   |   | 8.2   | 8.2   | 7.8   | 1.0 | 0.2 | 1.1 | 0.1 |
| 6478 | 141d05 | AV624444 | LC077h04  |   |   | 12.0  | 12.6  | 12.0  | 1.1 | 0.3 | 1.1 | 0.2 |
| 6479 | 122h03 | AV638979 | HC093d03  |   |   | 6.5   | 5.1   | 4.8   | 0.8 | 0.1 | 1.1 | 0.1 |
| 6480 | 154c11 | BP098888 | MXL100h03 |   |   | 7.5   | 7.5   | 7.2   | 1.0 | 0.1 | 1.1 | 0.2 |
| 6481 | 127d02 | AV641762 | HCL039h05 |   |   | 4.2   | 3.7   | 3.5   | 0.9 | 0.1 | 1.1 | 0.2 |
| 6482 | 007h09 | AV392523 | CM062b04  |   |   | 4.0   | 4.8   | 4.7   | 1.2 | 0.5 | 1.1 | 0.6 |
| 6483 | 150g06 | AV629142 | LCL053a01 |   |   | 11.8  | 12.7  | 13.4  | 1.1 | 0.4 | 1.1 | 0.5 |
| 6484 | 114b12 | AV388945 | CM074b05  |   |   | 7.9   | 5.6   | 5.5   | 0.7 | 0.1 | 1.1 | 0.3 |
| 6485 | 103g07 | AV395484 | CL42a09   |   |   | 5.2   | 4.4   | 4.3   | 0.9 | 0.4 | 1.1 | 0.5 |
| 6486 | 128h02 | AV642570 | HCL054a09 |   |   | 4.7   | 5.3   | 5.0   | 1.1 | 0.1 | 1.1 | 0.2 |
| 6487 | 143f08 | AV625878 | LC099c07  |   |   | 14.1  | 16.5  | 15.6  | 1.2 | 0.2 | 1.1 | 0.0 |
| 6488 | 169d09 | BP096972 | MXL068a03 |   |   | 19.0  | 13.5  | 13.3  | 0.7 | 0.1 | 1.1 | 0.4 |
| 6489 | 163g09 | BP094501 | MXL024b02 |   |   | 10.9  | 14.8  | 14.9  | 1.8 | 2.0 | 1.1 | 1.1 |
| 6490 | 128a11 | AV642155 | HCL046e10 |   |   | 29.3  | 31.3  | 29.8  | 1.1 | 0.3 | 1.1 | 0.2 |
| 6491 | 144a08 | AV626112 | LCL002e07 |   |   | 21.6  | 18.1  | 18.1  | 0.8 | 0.1 | 1.1 | 0.3 |
| 6492 | 006h11 | AV390857 | CM048e05  |   |   | 28.8  | 28.1  | 27.0  | 1.0 | 0.1 | 1.1 | 0.1 |
| 6493 | 029b11 | AV630675 | LCL082e08 |   |   | 3.7   | 2.0   | 1.9   | 0.6 | 0.2 | 1.1 | 0.2 |
| 6494 | 133g11 | AV645220 | HCL099g09 |   |   | 67.0  | 98.9  | 96.4  | 1.6 | 0.8 | 1.1 | 0.4 |
| 6495 | 123h05 | AV639843 | HCL006a07 |   |   | 19.7  | 17.1  | 16.1  | 0.9 | 0.1 | 1.1 | 0.1 |
| 6496 | 110c02 | AV389050 | CM034c06  |   |   | 3.7   | 5.2   | 5.1   | 1.5 | 0.4 | 1.1 | 0.3 |
| 6497 | 023a08 | AV624598 | LC080a01  |   |   | 8.2   | 21.1  | 19.7  | 2.6 | 0.5 | 1.1 | 0.1 |
| 6498 | 021h11 | AV623145 | LC059e08  |   |   | 8.1   | 7.1   | 6.7   | 0.9 | 0.2 | 1.1 | 0.1 |
| 6499 | 120d08 | AV636021 | HC054b04  |   |   | 5.6   | 4.7   | 4.7   | 0.8 | 0.2 | 1.1 | 0.4 |
| 6500 | 020b12 | AV620832 | LC027d10  |   |   | 12.7  | 12.0  | 11.0  | 0.9 | 0.2 | 1.1 | 0.2 |
| 6501 | 025h04 | AV627901 | LCL033f05 |   |   | 3.6   | 4.6   | 4.4   | 1.4 | 0.8 | 1.1 | 0.4 |
| 6502 | 016f09 | AV642422 | HCL051e06 |   |   | 8.1   | 17.2  | 16.0  | 2.1 | 0.9 | 1.1 | 0.3 |
| 6503 | 105c10 | AV396325 | CL61f06   |   |   | 8.3   | 8.5   | 8.3   | 1.0 | 0.1 | 1.1 | 0.3 |
| 6504 | 126d10 | AV641267 | HCL030g07 |   |   | 13.4  | 11.9  | 11.5  | 0.9 | 0.2 | 1.1 | 0.3 |
| 6505 | 116g12 | AV631957 | HC002b08  |   |   | 10.2  | 8.1   | 7.8   | 0.8 | 0.1 | 1.1 | 0.2 |
| 6506 | 138c02 | AV622164 | LC046a05  |   |   | 18.4  | 21.3  | 22.9  | 1.1 | 0.2 | 1.1 | 0.6 |
| 6507 | 015a01 | AV640580 | HCL018f04 |   |   | 7.8   | 13.1  | 12.5  | 1.8 | 0.8 | 1.1 | 0.2 |
| 6508 | 117a05 | AV632093 | HC003g12  |   |   | 5.9   | 3.9   | 3.8   | 0.7 | 0.2 | 1.1 | 0.2 |
| 6509 | 171d12 | BP097935 | MXL083g08 |   |   | 24.8  | 41.3  | 39.7  | 1.7 | 0.4 | 1.1 | 0.2 |
| 6510 | 158e10 | BP087664 | MX040h05  |   |   | 7.4   | 5.8   | 5.5   | 0.8 | 0.2 | 1.1 | 0.3 |
| 6511 | 167h06 | BP096235 | MXL055a07 |   |   | 6.6   | 13.2  | 12.7  | 1.9 | 0.5 | 1.1 | 0.6 |
| 6512 | 009a11 | AV390485 | CM083e04  |   |   | 5.5   | 4.1   | 5.3   | 0.8 | 0.5 | 1.1 | 0.9 |
| 6513 | 011c06 | AV634563 | HC035a03  |   |   | 12.1  | 8.6   | 8.2   | 0.7 | 0.2 | 1.1 | 0.3 |
| 6514 | 146h05 | AV627277 | LCL024c03 |   |   | 20.1  | 22.0  | 20.7  | 1.1 | 0.1 | 1.1 | 0.2 |
| 6515 | 027a08 | AV628777 | LCL046h08 |   |   | 5.9   | 5.9   | 5.8   | 1.1 | 0.3 | 1.1 | 0.2 |
| 6516 | 155f10 | AV631547 | LCL096a06 |   |   | 12.7  | 16.2  | 15.4  | 1.3 | 0.1 | 1.1 | 0.1 |
| 6517 | 020h05 | AV621575 | LC038a03  |   |   | 18.9  | 13.0  | 12.6  | 0.7 | 0.0 | 1.1 | 0.2 |
| 6518 | 172e02 | BP098397 | MXL092g03 |   |   | 20.6  | 18.4  | 17.6  | 0.9 | 0.1 | 1.1 | 0.2 |
| 6519 | 140a08 | BP383806 | LC065f12  |   |   | 52.0  | 40.8  | 40.8  | 0.8 | 0.1 | 1.1 | 0.4 |
| 6520 | 140b05 | AV623641 | LC066f08  |   |   | 5.3   | 5.9   | 5.8   | 1.1 | 0.2 | 1.1 | 0.3 |
| 6521 | 149h05 | AV628713 | LCL046a10 |   |   | 49.4  | 46.3  | 45.5  | 0.9 | 0.0 | 1.1 | 0.2 |
| 6522 | 006c01 | AV389424 | CM036f08  |   |   | 13.9  | 16.8  | 16.0  | 1.2 | 0.1 | 1.1 | 0.0 |
| 6523 | 003a02 | AV395852 | CL52e02   |   |   | 4.3   | 5.6   | 5.6   | 1.3 | 0.1 | 1.1 | 0.4 |
| 6524 | 007a05 | AV390968 | CM049c05  |   |   | 11.9  | 14.   |       |     |     |     |     |

|      | A      | B        | C         | D | E | F     | G     | H     | I   | J   | K   | L   |
|------|--------|----------|-----------|---|---|-------|-------|-------|-----|-----|-----|-----|
| 6525 | 151g11 | AV629696 | LCL063h11 |   |   | 6.3   | 6.6   | 6.3   | 1.1 | 0.2 | 1.1 | 0.2 |
| 6526 | 146b08 | AV627016 | LCL019h03 |   |   | 15.8  | 14.8  | 14.3  | 0.9 | 0.1 | 1.1 | 0.2 |
| 6527 | 025h05 | AV627902 | LCL033f07 |   |   | 10.8  | 11.6  | 11.1  | 1.1 | 0.1 | 1.1 | 0.2 |
| 6528 | 124g10 | BP098712 | MXL097g07 |   |   | 9.7   | 10.5  | 10.3  | 1.1 | 0.1 | 1.1 | 0.3 |
| 6529 | 109g07 | AV388444 | CM029f04  |   |   | 5.7   | 4.9   | 4.8   | 0.9 | 0.3 | 1.1 | 0.2 |
| 6530 | 124f11 | AV640227 | HCL012e08 |   |   | 10.2  | 9.9   | 9.6   | 1.0 | 0.1 | 1.1 | 0.2 |
| 6531 | 108d03 | AV387220 | CM018b12  |   |   | 6.3   | 5.6   | 5.5   | 0.9 | 0.1 | 1.1 | 0.2 |
| 6532 | 164e01 | BP094757 | MXL028h08 |   |   | 8.1   | 10.1  | 9.6   | 1.3 | 0.3 | 1.1 | 0.2 |
| 6533 | 117g06 | AV633091 | HC016f06  |   |   | 12.9  | 9.4   | 11.5  | 0.7 | 0.3 | 1.1 | 0.7 |
| 6534 | 104c04 | AV395644 | CL46d03   |   |   | 7.7   | 7.6   | 7.5   | 1.0 | 0.2 | 1.1 | 0.3 |
| 6535 | 142c03 | BP383820 | LC085g07  |   |   | 6.3   | 5.4   | 5.3   | 0.9 | 0.1 | 1.1 | 0.2 |
| 6536 | 023h04 | AV626189 | LCL003h10 |   |   | 2.7   | 3.5   | 3.4   | 1.5 | 0.7 | 1.1 | 0.2 |
| 6537 | 015e12 | AV641240 | HCL030c10 |   |   | 17.6  | 13.8  | 13.3  | 0.8 | 0.2 | 1.1 | 0.3 |
| 6538 | 011d08 | AV634848 | HC038g04  |   |   | 72.4  | 82.7  | 85.8  | 1.1 | 0.1 | 1.1 | 0.4 |
| 6539 | 115d07 | AV391149 | CM087c09  |   |   | 8.3   | 7.4   | 7.1   | 0.9 | 0.1 | 1.1 | 0.1 |
| 6540 | 159e11 | BP087868 | MX045d03  |   |   | 483.1 | 311.2 | 302.7 | 0.6 | 0.4 | 1.1 | 0.8 |
| 6541 | 010f07 | AV633242 | HC018e01  |   |   | 4.7   | 8.1   | 7.8   | 1.9 | 0.8 | 1.1 | 0.2 |
| 6542 | 116g09 | AV631890 | HC001c12  |   |   | 35.9  | 39.0  | 38.6  | 1.1 | 0.2 | 1.1 | 0.3 |
| 6543 | 002h03 | AV395728 | CL50c06   |   |   | 8.5   | 8.1   | 7.9   | 1.0 | 0.3 | 1.1 | 0.2 |
| 6544 | 143a04 | AV625540 | LC094c12  |   |   | 29.1  | 17.8  | 17.1  | 0.6 | 0.1 | 1.1 | 0.4 |
| 6545 | 135d09 | AV619956 | LC015e07  |   |   | 11.5  | 7.7   | 7.3   | 0.7 | 0.1 | 1.1 | 0.3 |
| 6546 | 031a03 | BP086348 | MX007a11  |   |   | 41.5  | 34.6  | 36.1  | 0.8 | 0.2 | 1.1 | 0.5 |
| 6547 | 131g08 | BP098764 | MXL098g02 |   |   | 8.0   | 8.3   | 8.0   | 1.1 | 0.1 | 1.1 | 0.2 |
| 6548 | 154a07 | AV630771 | LCL084b01 |   |   | 28.0  | 27.0  | 26.3  | 1.0 | 0.1 | 1.1 | 0.2 |
| 6549 | 028c03 | AV629804 | LCL066d11 |   |   | 24.6  | 21.2  | 20.0  | 0.8 | 0.1 | 1.1 | 0.4 |
| 6550 | 004d05 | AV386814 | CM007h02  |   |   | 20.7  | 22.8  | 30.7  | 1.2 | 0.3 | 1.1 | 0.8 |
| 6551 | 018h03 | AV619154 | LC004e04  |   |   | 3.4   | 5.4   | 5.0   | 1.6 | 0.4 | 1.1 | 0.3 |
| 6552 | 116g04 | AV631864 | HC001a03  |   |   | 9.7   | 10.9  | 10.4  | 1.1 | 0.3 | 1.1 | 0.1 |
| 6553 | 030c10 | AV631528 | LCL095f11 |   |   | 5.2   | 4.9   | 4.8   | 1.0 | 0.1 | 1.1 | 0.3 |
| 6554 | 033d08 | BP094363 | MXL022a07 |   |   | 6.3   | 8.5   | 8.3   | 1.4 | 0.2 | 1.1 | 0.2 |
| 6555 | 002a04 | AV394781 | CL28d03   |   |   | 6.3   | 9.9   | 12.1  | 1.6 | 0.4 | 1.1 | 0.6 |
| 6556 | 114g04 | AV390532 | CM080d01  |   |   | 16.0  | 20.8  | 20.0  | 1.3 | 0.2 | 1.1 | 0.2 |
| 6557 | 019b11 | AV619668 | LC011e09  |   |   | 8.7   | 3.2   | 3.5   | 0.4 | 0.2 | 1.1 | 0.6 |
| 6558 | 125h03 | AV640823 | HCL023a02 |   |   | 8.8   | 7.5   | 7.2   | 0.9 | 0.3 | 1.1 | 0.1 |
| 6559 | 020a09 | AV620730 | LC026b01  |   |   | 11.6  | 11.5  | 10.9  | 1.0 | 0.4 | 1.0 | 0.1 |
| 6560 | 151e03 | AV629529 | LCL060d01 |   |   | 25.8  | 27.0  | 28.1  | 1.1 | 0.2 | 1.0 | 0.4 |
| 6561 | 126e01 | AV641281 | HCL031a02 |   |   | 11.5  | 10.9  | 11.0  | 1.0 | 0.3 | 1.0 | 0.4 |
| 6562 | 114g01 | AV389785 | CM080a06  |   |   | 5.5   | 6.3   | 5.7   | 1.2 | 0.6 | 1.0 | 0.4 |
| 6563 | 034a03 | BP095151 | MXL036g02 |   |   | 70.4  | 66.8  | 64.4  | 0.9 | 0.1 | 1.0 | 0.2 |
| 6564 | 151e02 | AV629521 | LCL060b12 |   |   | 21.1  | 18.0  | 17.7  | 0.9 | 0.1 | 1.0 | 0.3 |
| 6565 | 119d01 | AV634920 | HC039f10  |   |   | 4.7   | 4.2   | 4.0   | 1.0 | 0.4 | 1.0 | 0.2 |
| 6566 | 145e12 | AV626758 | LCL014h12 |   |   | 25.8  | 37.6  | 36.6  | 1.5 | 0.3 | 1.0 | 0.2 |
| 6567 | 005a11 | AV387270 | CM018f09  |   |   | 10.4  | 8.3   | 8.5   | 0.8 | 0.4 | 1.0 | 0.5 |
| 6568 | 167f02 | BP096122 | MXL053b01 |   |   | 12.8  | 12.1  | 13.3  | 0.9 | 0.2 | 1.0 | 0.7 |
| 6569 | 108b06 | AV387433 | CM016h03  |   |   | 4.7   | 4.5   | 4.4   | 1.0 | 0.1 | 1.0 | 0.1 |
| 6570 | 023f03 | AV625261 | LC090b01  |   |   | 7.9   | 7.9   | 7.7   | 1.1 | 0.3 | 1.0 | 0.2 |
| 6571 | 004b12 | AV386632 | CM004d02  |   |   | 7.0   | 7.7   | 7.4   | 1.3 | 0.8 | 1.0 | 0.3 |
| 6572 | 008d09 | AV387595 | CM069f02  |   |   | 10.5  | 12.6  | 12.5  | 1.2 | 0.2 | 1.0 | 0.3 |
| 6573 | 127c06 | AV641722 | HCL039c11 |   |   | 10.4  | 10.4  | 9.9   | 1.0 | 0.2 | 1.0 | 0.1 |
| 6574 | 015g03 | AV641343 | HCL031h12 |   |   | 10.3  | 11.5  | 11.6  | 1.2 | 0.4 | 1.0 | 0.3 |
| 6575 | 167e06 | BP096094 | MXL052e12 |   |   | 11.6  | 13.4  | 16.1  | 1.1 | 0.2 | 1.0 | 0.7 |
| 6576 | 005d05 | AV387778 | CM023g09  |   |   | 70.9  | 84.0  | 83.4  | 1.2 | 0.1 | 1.0 | 0.2 |
| 6577 | 006b10 | AV389318 | CM036a10  |   |   | 7.7   | 8.9   | 8.7   | 1.2 | 0.3 | 1.0 | 0.2 |
| 6578 | 105g11 | AV396783 | CL69c12   |   |   | 12.4  | 14.1  | 13.5  | 1.1 | 0.1 | 1.0 | 0.0 |
| 6579 | 126b03 | AV641037 | HCL026f04 |   |   | 5.2   | 5.6   | 5.4   | 1.1 | 0.1 | 1.0 | 0.2 |
| 6580 | 131h05 | AV644350 | HCL086h03 |   |   | 7.6   | 8.1   | 8.0   | 1.1 | 0.3 | 1.0 | 0.2 |
| 6581 | 150g05 | AV629141 | LCL052h12 |   |   | 15.0  | 16.4  | 15.9  | 1.1 | 0.1 | 1.0 | 0.3 |
| 6582 | 013b05 | AV638070 | HC081e03  |   |   | 169.0 | 111.9 | 110.4 | 0.7 | 0.2 | 1.0 | 0.5 |
| 6583 | 139g01 | AV623310 | LC061h12  |   |   | 5.3   | 4.2   | 4.2   | 0.8 | 0.1 | 1.0 | 0.3 |
| 6584 | 163d01 | BP094236 | MXL019h10 |   |   | 13.0  | 7.5   | 8.8   | 0.7 | 0.2 | 1.0 | 0.5 |
| 6585 | 109d02 | AV388084 | CM025e08  |   |   | 19.9  | 16.1  | 15.5  | 0.8 | 0.2 | 1.0 | 0.2 |
| 6586 | 136e07 | AV620744 | LC026c07  |   |   | 4.7   | 4.0   | 4.0   | 0.8 | 0.3 | 1.0 | 0.4 |
| 6587 | 014f09 | AV640300 | HCL013h06 |   |   | 4.7   | 5.8   | 5.7   | 1.2 | 0.2 | 1.0 | 0.4 |
| 6588 | 142d09 | AV625172 | LC088h02  |   |   | 30.6  | 27.4  | 26.3  | 0.9 | 0.2 | 1.0 | 0.1 |
| 6589 | 160c06 | BP088514 | MX062c10  |   |   | 11.1  | 9.6   | 10.3  | 0.9 | 0.5 | 1.0 | 0.6 |
| 6590 | 119e08 | AV635146 | HC042e04  |   |   | 7.2   | 6.7   | 6.7   | 0.9 | 0.2 | 1.0 | 0.3 |
| 6591 | 135e08 | BP383780 | LC016f01  |   |   | 4.7   | 4.9   | 4.9   | 1.1 | 0.2 | 1.0 | 0.3 |
| 6592 | 143e09 | AV625794 | LC097h08  |   |   | 5.5   | 5.2   | 5.1   | 0.9 | 0.1 | 1.0 | 0.2 |
| 6593 | 103b03 | AV395050 | CL31h09   |   |   | 5.0   | 5.0   | 5.0   | 1.3 | 0.7 | 1.0 | 0.4 |
| 6594 | 005c01 | AV397469 | CM020h02  |   |   | 7.6   | 9.2   | 9.2   | 1.2 | 0.3 | 1.0 | 0.4 |
| 6595 | 135a01 | AV619608 | LC010f12  |   |   | 15.3  | 14.8  | 16.2  | 1.0 | 0.1 | 1.0 | 0.5 |
| 6596 | 111h06 | AV391242 | CM052a08  |   |   | 7.1   | 6.5   | 6.2   | 0.9 | 0.0 | 1.0 | 0.1 |
| 6597 | 128b09 | AV642216 | HCL047f06 |   |   | 19.9  | 21.6  | 20.7  | 1.1 | 0.1 | 1.0 | 0.1 |
| 6598 | 116a04 | AV392041 | CM094c05  |   |   | 3.4   | 4.1   | 4.1   | 1.2 | 0.4 | 1.0 | 0.2 |
| 6599 | 013g03 | AV639313 | HC097g07  |   |   | 9.1   | 11.5  | 11.0  | 1.3 | 0.2 | 1.0 | 0.1 |
| 6600 | 105e06 | AV396556 | CL65a05   |   |   | 7.0   | 5.4   | 5.2   | 0.8 | 0.1 | 1.0 | 0.1 |
| 6601 | 031b12 | BP086648 | MX013f08  |   |   | 8.6   | 7.5   | 7.4   | 0.9 | 0.2 | 1.0 | 0.3 |
| 6602 | 003b04 | AV396025 | CL55c08   |   |   | 6.8   | 7.7   | 7.3   | 1.1 | 0.0 | 1.0 | 0.2 |
| 6603 | 003e04 | AV396769 | CL66b12   |   |   | 7.1   | 10.5  | 11.1  | 1.5 | 0.4 | 1.0 | 0.5 |
| 6604 | 008b10 | AV393041 | CM066g08  |   |   | 15.9  | 11.9  | 11.6  | 0.7 | 0.1 | 1.0 | 0.3 |
| 6605 | 125f09 | AV640747 | HCL021g06 |   |   | 20.8  | 23.1  | 21.9  | 1.2 | 0.6 | 1.0 | 0.4 |
| 6606 | 109b07 | AV388240 | CM024c11  |   |   | 3.9   | 4.2   | 4.1   | 1.1 | 0.2 | 1.0 | 0.1 |
| 6607 | 128b11 | AV642222 | HCL047g02 |   |   | 70.8  | 58.2  | 56.2  | 0.8 | 0.0 | 1.0 | 0.1 |
| 6608 | 139a04 | AV622762 | LC054b09  |   |   | 6.5   | 4.3   | 4.2   | 0.7 | 0.3 | 1.0 | 0.3 |
| 6609 | 113g09 | AV397357 | CM070e09  |   |   | 9.2   | 9.6   | 9.7   | 1.1 | 0.2 | 1.0 | 0.2 |
| 6610 | 024h09 | AV626901 | LCL017g01 |   |   | 22.1  | 41.9  | 43.4  | 2.0 | 0.8 | 1.0 | 0.5 |
| 6611 | 034c05 | BP095543 | MXL043f02 |   |   | 10.8  | 11.4  | 10.8  | 1.1 | 0.2 | 1.0 | 0.2 |
| 6612 | 029c04 | AV630728 | LCL083d04 |   |   | 27.4  | 9.3   | 8.9   | 0.3 | 0.1 | 1.0 | 0.2 |
| 6613 | 152b10 | AV629830 | LCL067a12 |   |   | 9.7   | 9.0   | 8.8   | 0.9 | 0.1 | 1.0 | 0.2 |
| 6614 | 138e07 | AV622327 | LC048b12  |   |   | 13.1  | 30.1  | 29.2  | 2.5 | 0.9 | 1.0 | 0.2 |
| 6615 | 015h08 | AV641531 | HCL035f02 |   |   | 11.2  | 15.5  | 15.4  | 1.4 | 0.4 | 1.0 | 0.4 |
| 6616 | 105e04 | AV396669 | CL64e11   |   |   | 6.7   | 6.4   | 6.2   | 1.0 | 0.1 | 1.0 | 0.1 |
| 6617 | 107a12 | AV386813 | CM007a08  |   |   | 8.2   | 11.5  | 11.0  | 1.4 | 0.1 | 1.0 | 0.2 |
| 6618 | 148g08 | AV628186 | LCL038a03 |   |   | 5.4   | 5.9   | 6.3   | 1.1 | 0.3 | 1.0 | 0.6 |
| 6619 | 113e08 | AV393224 | CM068f03  |   |   | 13.5  | 9.4   | 9.7   | 0.9 | 0.4 | 1.0 | 0.4 |
| 6620 | 035b05 | BP096651 | MXL062d09 |   |   | 7.0   | 6.0   | 5.8   | 0.9 | 0.1 | 1.0 | 0.2 |
| 6621 | 133a12 | AV644954 | HCL095h08 |   |   | 10.8  | 10.9  | 10.5  | 1.0 | 0.2 | 1.0 | 0.4 |
| 6622 | 145h03 | AV626883 | LCL017c12 |   |   | 36.1  | 34.1  | 34.3  | 0.9 | 0.2 | 1.0 | 0.2 |
| 6623 | 018e10 | AV618952 | LC001g10  |   |   | 23.5  | 32.6  | 31.1  | 1.6 | 0.8 | 1.0 | 0.1 |
| 6624 | 153b07 | AV630358 | LCL077g07 |   |   | 13.2  | 12.4  | 12.0  | 1.0 | 0.2 | 1.0 | 0.1 |
| 6625 | 111e02 | AV390780 | CM047g06  |   |   | 7.3   | 6.8   | 6.5   | 0.9 | 0.1 | 1.0 | 0.0 |
| 6626 | 021e04 | AV622433 | LC049f09  |   |   | 43.5  | 42.6  | 41.2  | 1.0 | 0.2 | 1.0 | 0.1 |
| 6627 | 147e01 | AV627549 | LCL028d05 |   |   | 22.5  | 22.9  | 22.1  | 1.0 | 0.1 | 1.0 | 0.1 |
| 6628 | 022h06 | AV624363 | LC076f12  |   |   | 10.8  | 12.0  | 11.5  | 1.1 | 0.1 | 1.0 | 0.2 |
| 6629 | 035e04 | BP097071 | MXL069e11 |   |   | 7.9   | 7.9   | 7.8   | 1.0 | 0.1 | 1.0 | 0.1 |
| 6630 | 102h09 | BP098615 | MXL096c10 |   |   | 9.3   | 8.9   | 9.7   | 1.0 | 0.3 | 1.0 | 0.6 |
| 6631 | 119f03 | AV635205 | HC043c10  |   |   | 29.2  | 34.2  | 33    |     |     |     |     |

|      | A      | B        | C         | D | E | F     | G     | H     | I   | J   | K   | L   |
|------|--------|----------|-----------|---|---|-------|-------|-------|-----|-----|-----|-----|
| 6632 | 108c04 | AV388159 | CM017d08  |   |   | 55.7  | 45.9  | 44.6  | 0.8 | 0.1 | 1.0 | 0.2 |
| 6633 | 154c05 | AV630876 | LCL085e12 |   |   | 7.1   | 63.5  | 61.2  | 9.0 | 1.1 | 1.0 | 0.1 |
| 6634 | 148f03 | AV628110 | LCL036h05 |   |   | 18.7  | 16.0  | 15.6  | 0.9 | 0.1 | 1.0 | 0.2 |
| 6635 | 011g08 | AV635483 | HC046h05  |   |   | 59.6  | 38.8  | 37.4  | 0.6 | 0.2 | 1.0 | 0.3 |
| 6636 | 143e04 | AV625751 | LC097d03  |   |   | 15.7  | 13.2  | 14.4  | 0.9 | 0.2 | 1.0 | 0.5 |
| 6637 | 013h09 | AV639633 | HCL002b08 |   |   | 3.7   | 4.9   | 5.0   | 1.4 | 0.8 | 1.0 | 0.6 |
| 6638 | 016a12 | AV641671 | HCL038e01 |   |   | 9.6   | 7.0   | 7.7   | 0.9 | 0.6 | 1.0 | 0.7 |
| 6639 | 137g08 | AV621878 | LC042b04  |   |   | 7.6   | 15.3  | 13.7  | 2.3 | 1.7 | 1.0 | 0.4 |
| 6640 | 113h01 | AV397419 | CM070h01  |   |   | 6.0   | 7.7   | 7.5   | 1.3 | 0.4 | 1.0 | 0.3 |
| 6641 | 033a12 | BP094005 | MXL016h02 |   |   | 11.0  | 8.5   | 9.4   | 0.8 | 0.1 | 1.0 | 0.6 |
| 6642 | 131h11 | AV644387 | HCL087f06 |   |   | 10.1  | 10.7  | 10.3  | 1.1 | 0.2 | 1.0 | 0.1 |
| 6643 | 034f02 | BP096000 | MXL050g12 |   |   | 26.5  | 23.7  | 22.9  | 0.9 | 0.1 | 1.0 | 0.2 |
| 6644 | 013e01 | AV638754 | HC090d03  |   |   | 7.0   | 10.0  | 9.5   | 1.4 | 0.1 | 1.0 | 0.3 |
| 6645 | 150e11 | AV629057 | LCL051a10 |   |   | 11.0  | 18.0  | 16.9  | 1.6 | 0.4 | 1.0 | 0.2 |
| 6646 | 018c12 | AV644424 | HCL088c04 |   |   | 2.2   | 3.1   | 3.1   | 1.3 | 0.6 | 1.0 | 0.7 |
| 6647 | 114f03 | AV388585 | CM078f02  |   |   | 9.7   | 9.1   | 8.7   | 0.9 | 0.2 | 1.0 | 0.2 |
| 6648 | 021f10 | AV622724 | LC053f05  |   |   | 9.4   | 7.5   | 7.3   | 0.8 | 0.1 | 1.0 | 0.2 |
| 6649 | 126d02 | AV641215 | HCL029h09 |   |   | 5.3   | 5.4   | 5.3   | 1.1 | 0.3 | 1.0 | 0.2 |
| 6650 | 143a08 | AV625555 | LC094e10  |   |   | 8.1   | 6.6   | 6.5   | 0.9 | 0.2 | 1.0 | 0.3 |
| 6651 | 108d11 | AV387319 | CM019d04  |   |   | 6.9   | 7.0   | 6.7   | 1.1 | 0.3 | 1.0 | 0.1 |
| 6652 | 133h08 | AV645280 | HCL100e12 |   |   | 6.5   | 6.9   | 6.8   | 1.1 | 0.2 | 1.0 | 0.2 |
| 6653 | 136d03 | AV620647 | LC024h10  |   |   | 7.4   | 6.4   | 6.8   | 0.9 | 0.2 | 1.0 | 0.5 |
| 6654 | 147e12 | AV627597 | LCL029c01 |   |   | 3.5   | 4.0   | 3.9   | 1.2 | 0.2 | 1.0 | 0.3 |
| 6655 | 106h09 | AV386652 | CM004c09  |   |   | 12.1  | 12.0  | 11.6  | 1.0 | 0.1 | 1.0 | 0.2 |
| 6656 | 127g03 | AV641981 | HCL043d09 |   |   | 19.5  | 14.6  | 14.7  | 0.8 | 0.0 | 1.0 | 0.3 |
| 6657 | 145e10 | AV626741 | LCL014g01 |   |   | 5.3   | 8.9   | 8.6   | 1.7 | 0.6 | 1.0 | 0.2 |
| 6658 | 109h10 | AV388691 | CM031d07  |   |   | 7.3   | 5.9   | 5.7   | 0.8 | 0.1 | 1.0 | 0.4 |
| 6659 | 017b05 | AV642896 | HCL060b02 |   |   | 14.5  | 14.0  | 13.9  | 1.0 | 0.2 | 1.0 | 0.4 |
| 6660 | 115b04 | AV390703 | CM084h01  |   |   | 154.3 | 173.3 | 167.2 | 1.1 | 0.0 | 1.0 | 0.3 |
| 6661 | 028c07 | AV629837 | LCL067c04 |   |   | 7.0   | 8.4   | 7.9   | 1.2 | 0.3 | 1.0 | 0.3 |
| 6662 | 127c01 | AV641697 | HCL038h04 |   |   | 8.1   | 9.7   | 9.3   | 1.2 | 0.2 | 1.0 | 0.3 |
| 6663 | 110c09 | AV389114 | CM035c04  |   |   | 4.4   | 4.4   | 5.0   | 1.0 | 0.2 | 1.0 | 0.5 |
| 6664 | 005f05 | AV387631 | CM027c10  |   |   | 9.9   | 10.2  | 10.0  | 1.1 | 0.3 | 1.0 | 0.1 |
| 6665 | 005e01 | AV388220 | CM024f11  |   |   | 73.6  | 83.0  | 82.2  | 1.2 | 0.4 | 1.0 | 0.3 |
| 6666 | 152a01 | AV629739 | LCL065a06 |   |   | 17.5  | 12.6  | 12.2  | 0.7 | 0.1 | 1.0 | 0.3 |
| 6667 | 109b03 | AV387816 | CM023g10  |   |   | 10.2  | 18.5  | 21.5  | 1.9 | 0.3 | 1.0 | 0.7 |
| 6668 | 152d08 | AV629964 | LCL070b04 |   |   | 22.5  | 26.0  | 25.0  | 1.2 | 0.1 | 1.0 | 0.0 |
| 6669 | 133d05 | AV645043 | HCL097d04 |   |   | 9.6   | 9.3   | 9.2   | 1.0 | 0.3 | 1.0 | 0.3 |
| 6670 | 171g06 | BP098068 | MXL086d08 |   |   | 20.2  | 42.7  | 38.3  | 2.0 | 1.3 | 1.0 | 0.6 |
| 6671 | 135d06 | AV619930 | LC015b10  |   |   | 6.4   | 6.1   | 6.0   | 1.0 | 0.1 | 1.0 | 0.2 |
| 6672 | 107h09 | AV387088 | CM013g07  |   |   | 384.1 | 344.7 | 343.3 | 0.9 | 0.1 | 1.0 | 0.2 |
| 6673 | 006f08 | AV390273 | CM044g03  |   |   | 44.3  | 60.4  | 54.8  | 1.2 | 0.4 | 1.0 | 0.6 |
| 6674 | 118e07 | AV633900 | HC026f12  |   |   | 5.1   | 4.7   | 4.5   | 0.9 | 0.1 | 1.0 | 0.1 |
| 6675 | 109h01 | AV388543 | CM030b05  |   |   | 14.3  | 10.6  | 10.3  | 0.7 | 0.2 | 1.0 | 0.2 |
| 6676 | 106c03 | AV397117 | CL76f02   |   |   | 72.2  | 56.7  | 54.5  | 0.8 | 0.3 | 1.0 | 0.0 |
| 6677 | 155d03 | AV631395 | LCL093b12 |   |   | 9.4   | 9.3   | 8.9   | 1.3 | 0.7 | 1.0 | 0.2 |
| 6678 | 146g09 | AV627245 | LCL023e09 |   |   | 137.5 | 113.7 | 122.6 | 0.8 | 0.0 | 1.0 | 0.5 |
| 6679 | 138d06 | AV622234 | LC046h08  |   |   | 13.7  | 8.5   | 8.3   | 0.6 | 0.3 | 1.0 | 0.5 |
| 6680 | 169e02 | BP096987 | MXL068c09 |   |   | 7.2   | 5.8   | 5.7   | 0.8 | 0.1 | 1.0 | 0.4 |
| 6681 | 016g04 | BP383731 | HCL052h07 |   |   | 27.9  | 25.6  | 32.6  | 0.9 | 0.2 | 1.0 | 0.6 |
| 6682 | 113e10 | AV393257 | CM068f11  |   |   | 147.0 | 187.9 | 180.5 | 1.3 | 0.1 | 1.0 | 0.2 |
| 6683 | 101h09 | AV394132 | CL17b07   |   |   | 4.6   | 4.9   | 4.8   | 1.1 | 0.3 | 1.0 | 0.1 |
| 6684 | 016c02 | AV641863 | HCL041e06 |   |   | 8.1   | 7.0   | 6.8   | 0.9 | 0.4 | 1.0 | 0.2 |
| 6685 | 151a04 | AV629294 | LCL056a08 |   |   | 10.2  | 13.0  | 13.1  | 1.3 | 0.2 | 1.0 | 0.3 |
| 6686 | 137e01 | AV621601 | LC038c11  |   |   | 38.5  | 34.9  | 33.7  | 1.1 | 0.5 | 1.0 | 0.1 |
| 6687 | 145b04 | AV626534 | LCL010g08 |   |   | 19.8  | 16.7  | 18.7  | 0.9 | 0.1 | 1.0 | 0.5 |
| 6688 | 169c05 | BP096891 | MXL066e10 |   |   | 8.5   | 9.4   | 9.5   | 1.3 | 0.9 | 1.0 | 0.4 |
| 6689 | 106b05 | AV397069 | CL75c04   |   |   | 20.8  | 18.6  | 17.6  | 0.9 | 0.6 | 1.0 | 0.6 |
| 6690 | 149f08 | AV628582 | LCL044b02 |   |   | 4.2   | 4.0   | 3.9   | 1.0 | 0.2 | 1.0 | 0.1 |
| 6691 | 149f05 | AV628556 | LCL043g01 |   |   | 57.8  | 58.7  | 57.3  | 1.0 | 0.1 | 1.0 | 0.1 |
| 6692 | 032g09 | BP093627 | MXL011b06 |   |   | 6.1   | 4.7   | 4.7   | 0.8 | 0.2 | 1.0 | 0.2 |
| 6693 | 149h12 | AV628763 | LCL046g02 |   |   | 3.4   | 6.6   | 6.2   | 1.9 | 1.1 | 1.0 | 0.4 |
| 6694 | 138h09 | AV622721 | LC053e12  |   |   | 8.1   | 6.8   | 6.7   | 0.8 | 0.0 | 1.0 | 0.3 |
| 6695 | 104g04 | AV396002 | CL53e10   |   |   | 7.6   | 7.7   | 7.5   | 1.0 | 0.3 | 1.0 | 0.3 |
| 6696 | 171e06 | BP097968 | MXL084d06 |   |   | 9.3   | 12.8  | 13.2  | 1.3 | 0.4 | 1.0 | 0.6 |
| 6697 | 112h11 | AV392551 | CM062d10  |   |   | 12.3  | 10.6  | 10.4  | 0.9 | 0.2 | 1.0 | 0.1 |
| 6698 | 169d10 | BP096973 | MXL068a05 |   |   | 48.0  | 53.7  | 53.9  | 1.4 | 0.9 | 1.0 | 0.4 |
| 6699 | 138c12 | AV622214 | LC046f09  |   |   | 9.5   | 35.8  | 36.4  | 3.8 | 0.4 | 1.0 | 0.3 |
| 6700 | 125c12 | AV640588 | HCL018g03 |   |   | 15.2  | 16.8  | 16.8  | 1.1 | 0.2 | 1.0 | 0.3 |
| 6701 | 125d08 | AV640619 | HCL019c11 |   |   | 5.9   | 5.0   | 5.0   | 0.9 | 0.1 | 1.0 | 0.2 |
| 6702 | 105c07 | AV396332 | CL61a01   |   |   | 9.2   | 9.3   | 9.1   | 1.0 | 0.3 | 1.0 | 0.1 |
| 6703 | 023h11 | AV626241 | LCL004h11 |   |   | 2.6   | 2.2   | 2.1   | 0.8 | 0.2 | 1.0 | 0.2 |
| 6704 | 130b08 | AV643276 | HCL066f12 |   |   | 9.5   | 9.7   | 9.4   | 1.0 | 0.2 | 1.0 | 0.1 |
| 6705 | 141e11 | AV624582 | LC079f12  |   |   | 22.7  | 20.7  | 22.3  | 1.2 | 0.6 | 1.0 | 0.4 |
| 6706 | 157d02 | BP086832 | MX017h06  |   |   | 14.1  | 29.8  | 28.6  | 2.1 | 0.2 | 1.0 | 0.1 |
| 6707 | 106e09 | AV386526 | CM001f05  |   |   | 10.8  | 10.2  | 10.9  | 1.0 | 0.2 | 1.0 | 0.4 |
| 6708 | 003e01 | AV396649 | CL64e12   |   |   | 3.2   | 4.0   | 3.9   | 1.3 | 0.4 | 1.0 | 0.3 |
| 6709 | 147d08 | AV627537 | LCL028b10 |   |   | 4.6   | 4.3   | 4.4   | 1.0 | 0.3 | 1.0 | 0.4 |
| 6710 | 018a05 | AV644089 | HCL081f01 |   |   | 5.6   | 7.0   | 6.7   | 1.3 | 0.4 | 1.0 | 0.2 |
| 6711 | 026h09 | AV628670 | LCL045d07 |   |   | 6.5   | 7.3   | 7.2   | 1.1 | 0.1 | 1.0 | 0.1 |
| 6712 | 137f05 | AV621766 | LC040f10  |   |   | 5.6   | 5.0   | 4.9   | 0.9 | 0.1 | 1.0 | 0.2 |
| 6713 | 117g05 | AV633084 | HC016e11  |   |   | 7.3   | 8.9   | 8.6   | 1.2 | 0.1 | 1.0 | 0.3 |
| 6714 | 032a03 | BP087588 | MX038b09  |   |   | 6.5   | 5.8   | 5.8   | 1.0 | 0.3 | 1.0 | 0.2 |
| 6715 | 115e02 | AV391094 | CM088f08  |   |   | 7.7   | 7.8   | 7.5   | 1.0 | 0.1 | 1.0 | 0.1 |
| 6716 | 115b06 | AV390664 | CM084h05  |   |   | 11.8  | 10.5  | 10.1  | 1.0 | 0.2 | 1.0 | 0.1 |
| 6717 | 019g11 | AV620294 | LC020b11  |   |   | 7.3   | 5.8   | 6.7   | 0.8 | 0.2 | 1.0 | 0.6 |
| 6718 | 015c08 | AV640969 | HCL025e08 |   |   | 6.6   | 6.6   | 7.2   | 1.0 | 0.2 | 1.0 | 0.5 |
| 6719 | 128h01 | AV642569 | HCL054a08 |   |   | 5.7   | 6.3   | 6.4   | 1.1 | 0.0 | 1.0 | 0.3 |
| 6720 | 172h09 | BP098579 | MXL095g10 |   |   | 8.6   | 9.2   | 9.6   | 1.1 | 0.1 | 1.0 | 0.5 |
| 6721 | 170h06 | BP097637 | MXL078h02 |   |   | 4.1   | 4.6   | 5.6   | 1.0 | 0.7 | 1.0 | 0.9 |
| 6722 | 136h07 | AV620980 | LC029e06  |   |   | 87.2  | 70.8  | 69.7  | 0.9 | 0.2 | 1.0 | 0.1 |
| 6723 | 148a11 | AV627828 | LCL032f04 |   |   | 12.5  | 10.4  | 10.5  | 0.8 | 0.1 | 1.0 | 0.4 |
| 6724 | 145d04 | AV626658 | LCL013b05 |   |   | 13.6  | 16.5  | 16.0  | 1.2 | 0.1 | 1.0 | 0.2 |
| 6725 | 017a12 | AV642857 | HCL059d04 |   |   | 65.2  | 31.0  | 29.6  | 0.5 | 0.1 | 1.0 | 0.3 |
| 6726 | 024f08 | AV626716 | LCL014b11 |   |   | 11.1  | 10.9  | 10.5  | 1.0 | 0.0 | 1.0 | 0.2 |
| 6727 | 106a01 | AV396995 | CL73e02   |   |   | 1.5   | 2.2   | 2.2   | 1.5 | 0.7 | 1.0 | 0.5 |
| 6728 | 135g05 | AV620218 | LC019b09  |   |   | 11.4  | 9.8   | 9.6   | 0.9 | 0.1 | 1.0 | 0.1 |
| 6729 | 116d02 | AV392679 | CM098f07  |   |   | 4.5   | 4.9   | 4.7   | 1.1 | 0.3 | 1.0 | 0.1 |
| 6730 | 013h04 | AV639618 | HCL002a03 |   |   | 12.7  | 10.1  | 9.8   | 0.9 | 0.3 | 1.0 | 0.1 |
| 6731 | 002g04 | AV395719 | CL47h11   |   |   | 7.1   | 8.0   | 8.0   | 1.2 | 0.3 | 1.0 | 0.3 |
| 6732 | 026c09 | AV628260 | LCL039c04 |   |   | 18.6  | 20.2  | 22.2  | 1.1 | 0.1 | 1.0 | 0.4 |
| 6733 | 150f08 | AV629103 | LCL052a12 |   |   | 12.3  | 12.9  | 12.7  | 1.1 | 0.1 | 1.0 | 0.2 |
| 6734 | 113d08 | AV393106 | CM067d07  |   |   | 9.0   | 9.8   | 9.7   | 1.1 | 0.2 | 1.0 | 0.2 |
| 6735 | 105b05 | AV396189 | CL58c01   |   |   | 17.4  | 9.1   | 8.7   | 0.6 | 0.1 | 1.0 | 0.3 |
| 6736 | 106g12 | AV386581 | CM003g05  |   |   | 16.6  | 21.2  | 20.5  | 1.3 | 0.3 | 1.0 | 0.1 |
| 6737 | 110b10 | AV388981 | CM034b05  |   |   | 10.7  | 11.1  | 10.8  | 1.1 | 0.2 | 1.0 | 0.1 |
| 6738 | 012b08 | AV636250 | HC057a08  |   |   | 9.7   | 9.2   | 11.1  |     |     |     |     |

|      | A      | B        | C         | D | E | F     | G     | H     | I   | J   | K   | L   |
|------|--------|----------|-----------|---|---|-------|-------|-------|-----|-----|-----|-----|
| 6739 | 013d12 | AV638730 | HC090a10  |   |   | 6.3   | 6.3   | 6.0   | 1.0 | 0.1 | 1.0 | 0.2 |
| 6740 | 117f02 | AV632850 | HC013d09  |   |   | 23.3  | 22.6  | 23.2  | 1.0 | 0.1 | 1.0 | 0.3 |
| 6741 | 154b01 | AV630788 | LCL084d01 |   |   | 42.2  | 41.1  | 50.5  | 1.0 | 0.0 | 1.0 | 0.5 |
| 6742 | 026f11 | AV628514 | LCL043a12 |   |   | 53.1  | 37.6  | 36.5  | 0.7 | 0.2 | 1.0 | 0.1 |
| 6743 | 166e12 | BP095714 | MXL046c10 |   |   | 22.9  | 29.6  | 28.3  | 1.3 | 0.1 | 1.0 | 0.2 |
| 6744 | 115g02 | AV391364 | CM090f07  |   |   | 8.5   | 8.9   | 8.8   | 1.0 | 0.1 | 1.0 | 0.3 |
| 6745 | 169f09 | BP098882 | MXL100g08 |   |   | 26.5  | 25.1  | 25.2  | 1.0 | 0.4 | 1.0 | 0.4 |
| 6746 | 130g05 | AV643686 | HCL074b05 |   |   | 5.4   | 7.2   | 6.9   | 1.3 | 0.2 | 1.0 | 0.3 |
| 6747 | 015b11 | AV640772 | HCL022b08 |   |   | 12.2  | 9.1   | 10.8  | 0.9 | 0.4 | 1.0 | 0.5 |
| 6748 | 137g09 | BP383793 | LC042c08  |   |   | 218.5 | 226.4 | 225.3 | 1.0 | 0.0 | 1.0 | 0.3 |
| 6749 | 020g10 | AV621481 | LC036g04  |   |   | 4.3   | 6.5   | 6.4   | 1.5 | 0.5 | 1.0 | 0.4 |
| 6750 | 161g03 | BP093300 | MXL006d08 |   |   | 5.6   | 4.4   | 5.1   | 0.8 | 0.2 | 1.0 | 0.6 |
| 6751 | 141f09 | AV624682 | LC081b09  |   |   | 8.8   | 5.2   | 5.2   | 0.6 | 0.3 | 1.0 | 0.4 |
| 6752 | 115f06 | BP383684 | CM089h08  |   |   | 7.7   | 7.0   | 7.4   | 0.9 | 0.2 | 1.0 | 0.4 |
| 6753 | 123c07 | AV639448 | HC099e06  |   |   | 9.1   | 7.5   | 7.7   | 0.8 | 0.1 | 1.0 | 0.3 |
| 6754 | 153d02 | AV630461 | LCL079b10 |   |   | 59.0  | 45.8  | 50.6  | 0.8 | 0.1 | 1.0 | 0.4 |
| 6755 | 125b04 | AV640442 | HCL016d02 |   |   | 7.4   | 6.6   | 6.5   | 0.9 | 0.2 | 1.0 | 0.2 |
| 6756 | 021c05 | AV622123 | LC045d08  |   |   | 12.7  | 10.5  | 10.6  | 0.8 | 0.1 | 1.0 | 0.2 |
| 6757 | 153f09 | AV630591 | LCL081c01 |   |   | 14.3  | 15.4  | 14.8  | 1.1 | 0.3 | 1.0 | 0.2 |
| 6758 | 141f12 | AV624692 | LC081c09  |   |   | 8.0   | 7.8   | 7.9   | 1.0 | 0.1 | 1.0 | 0.2 |
| 6759 | 160d08 | BP088607 | MX064g12  |   |   | 7.0   | 7.6   | 7.1   | 1.0 | 0.2 | 1.0 | 0.3 |
| 6760 | 134g04 | AV619500 | LC009b07  |   |   | 4.6   | 6.4   | 6.3   | 1.4 | 0.6 | 1.0 | 0.3 |
| 6761 | 127f12 | AV641968 | HCL043c01 |   |   | 10.9  | 10.1  | 10.0  | 1.0 | 0.2 | 1.0 | 0.3 |
| 6762 | 111e01 | AV390765 | CM047g04  |   |   | 9.1   | 15.8  | 15.8  | 1.8 | 0.4 | 1.0 | 0.2 |
| 6763 | 149a07 | AV628318 | LCL040a07 |   |   | 7.8   | 6.5   | 6.4   | 0.9 | 0.2 | 1.0 | 0.2 |
| 6764 | 125a01 | AV640365 | HCL015a04 |   |   | 11.6  | 11.4  | 11.2  | 1.0 | 0.1 | 1.0 | 0.1 |
| 6765 | 012c05 | AV636421 | HC059c05  |   |   | 27.3  | 28.4  | 27.7  | 1.1 | 0.1 | 1.0 | 0.1 |
| 6766 | 152a08 | AV629777 | LCL066a03 |   |   | 28.2  | 36.5  | 35.7  | 1.3 | 0.1 | 1.0 | 0.1 |
| 6767 | 126a12 | AV641015 | HCL026c06 |   |   | 13.1  | 14.0  | 14.2  | 1.1 | 0.2 | 1.0 | 0.2 |
| 6768 | 149c05 | AV628434 | LCL041g11 |   |   | 13.1  | 20.0  | 19.4  | 1.6 | 0.2 | 1.0 | 0.1 |
| 6769 | 152c04 | AV629858 | LCL067g07 |   |   | 9.9   | 7.8   | 7.6   | 0.8 | 0.2 | 1.0 | 0.3 |
| 6770 | 165g11 | BP095353 | MXL040d09 |   |   | 26.6  | 31.6  | 31.2  | 1.1 | 0.6 | 1.0 | 0.7 |
| 6771 | 149d11 | AV628498 | LCL042g08 |   |   | 10.7  | 10.4  | 10.3  | 1.0 | 0.1 | 1.0 | 0.2 |
| 6772 | 008b02 | AV392870 | CM065a07  |   |   | 7.0   | 14.8  | 16.0  | 2.2 | 0.7 | 1.0 | 0.5 |
| 6773 | 003h10 | AV397343 | CL80f06   |   |   | 10.7  | 12.5  | 11.6  | 1.0 | 0.6 | 1.0 | 0.8 |
| 6774 | 023f11 | AV626011 | LCL001a10 |   |   | 2.9   | 3.1   | 3.3   | 1.1 | 0.2 | 1.0 | 0.4 |
| 6775 | 106a10 | AV396479 | CL74d04   |   |   | 36.9  | 37.1  | 37.3  | 1.0 | 0.4 | 1.0 | 0.4 |
| 6776 | 124h05 | AV640331 | HCL014d04 |   |   | 9.1   | 9.4   | 9.1   | 1.1 | 0.3 | 1.0 | 0.0 |
| 6777 | 131h02 | AV644333 | HCL086e08 |   |   | 30.0  | 30.0  | 31.6  | 1.0 | 0.1 | 1.0 | 0.4 |
| 6778 | 111b01 | AV390184 | CM043d02  |   |   | 40.1  | 66.3  | 77.0  | 1.7 | 0.4 | 1.0 | 0.5 |
| 6779 | 112a03 | AV391333 | CM053d04  |   |   | 39.7  | 56.4  | 55.1  | 1.6 | 0.5 | 1.0 | 0.1 |
| 6780 | 105h05 | AV396824 | CL70f04   |   |   | 14.2  | 15.3  | 14.7  | 1.1 | 0.2 | 1.0 | 0.2 |
| 6781 | 111a10 | AV390173 | CM043a02  |   |   | 19.8  | 18.4  | 19.0  | 0.9 | 0.2 | 1.0 | 0.4 |
| 6782 | 121h03 | AV637603 | HC075e06  |   |   | 6.5   | 6.0   | 5.8   | 0.9 | 0.3 | 1.0 | 0.2 |
| 6783 | 015e11 | AV641205 | HCL029g02 |   |   | 13.1  | 13.8  | 13.7  | 1.1 | 0.4 | 1.0 | 0.4 |
| 6784 | 119f09 | AV635282 | HC044d01  |   |   | 10.3  | 10.1  | 10.2  | 1.0 | 0.3 | 1.0 | 0.2 |
| 6785 | 153e07 | AV630523 | LCL080c01 |   |   | 5.3   | 4.6   | 4.6   | 0.9 | 0.2 | 1.0 | 0.3 |
| 6786 | 125b08 | AV640460 | HCL016f08 |   |   | 3.5   | 3.2   | 3.2   | 0.9 | 0.2 | 1.0 | 0.5 |
| 6787 | 025e08 | AV627490 | LCL027e08 |   |   | 119.7 | 74.5  | 73.8  | 0.6 | 0.1 | 1.0 | 0.4 |
| 6788 | 109h02 | AV388558 | CM030b10  |   |   | 4.0   | 4.2   | 4.4   | 1.1 | 0.2 | 1.0 | 0.3 |
| 6789 | 111a01 | AV390029 | CM041f01  |   |   | 3.6   | 4.1   | 4.1   | 1.3 | 0.5 | 1.0 | 0.2 |
| 6790 | 007h08 | AV392522 | CM062b02  |   |   | 162.1 | 145.4 | 139.7 | 0.9 | 0.1 | 1.0 | 0.1 |
| 6791 | 110h12 | AV390016 | CM041d10  |   |   | 3.8   | 3.5   | 3.5   | 1.0 | 0.1 | 1.0 | 0.1 |
| 6792 | 114g11 | AV389952 | CM081d01  |   |   | 23.9  | 21.7  | 21.2  | 0.9 | 0.0 | 1.0 | 0.1 |
| 6793 | 152d09 | AV629971 | LCL070c05 |   |   | 7.0   | 9.6   | 9.2   | 1.4 | 0.3 | 1.0 | 0.3 |
| 6794 | 022g01 | AV624154 | LC079f10  |   |   | 37.3  | 29.2  | 28.9  | 0.8 | 0.2 | 1.0 | 0.4 |
| 6795 | 012f12 | AV637276 | HC071a04  |   |   | 9.6   | 7.8   | 7.9   | 0.8 | 0.3 | 1.0 | 0.4 |
| 6796 | 138h08 | AV622716 | LC053e05  |   |   | 20.1  | 19.2  | 19.5  | 1.0 | 0.3 | 1.0 | 0.5 |
| 6797 | 120h03 | AV636476 | HC060a06  |   |   | 9.2   | 8.9   | 10.4  | 1.0 | 0.2 | 1.0 | 0.6 |
| 6798 | 018a03 | AV644083 | HCL081e05 |   |   | 26.4  | 26.4  | 26.0  | 1.0 | 0.1 | 1.0 | 0.1 |
| 6799 | 115f10 | AV391346 | CM090b03  |   |   | 40.3  | 36.7  | 34.7  | 0.9 | 0.2 | 1.0 | 0.5 |
| 6800 | 136g06 | AV620878 | LC028a07  |   |   | 5.9   | 8.8   | 8.6   | 1.5 | 0.3 | 1.0 | 0.2 |
| 6801 | 153d05 | AV630471 | LCL079d03 |   |   | 17.7  | 18.9  | 18.5  | 1.2 | 0.4 | 1.0 | 0.1 |
| 6802 | 165f08 | BP095303 | MXL039f04 |   |   | 120.5 | 103.3 | 100.7 | 1.0 | 0.4 | 1.0 | 0.1 |
| 6803 | 020g11 | AV621485 | LC036g08  |   |   | 5.3   | 5.2   | 5.3   | 1.0 | 0.3 | 1.0 | 0.3 |
| 6804 | 121g12 | BP383714 | HC074g04  |   |   | 11.0  | 10.2  | 10.8  | 0.9 | 0.1 | 1.0 | 0.3 |
| 6805 | 022f10 | AV624117 | LC073b09  |   |   | 10.9  | 9.9   | 9.7   | 0.9 | 0.0 | 1.0 | 0.2 |
| 6806 | 134d04 | AV619209 | LC005b09  |   |   | 195.0 | 230.4 | 232.5 | 1.2 | 0.1 | 1.0 | 0.2 |
| 6807 | 105c12 | AV396329 | CL61f11   |   |   | 5.0   | 6.1   | 6.2   | 1.2 | 0.3 | 1.0 | 0.4 |
| 6808 | 118b08 | AV633519 | HC021g03  |   |   | 10.2  | 8.7   | 8.5   | 0.9 | 0.1 | 1.0 | 0.3 |
| 6809 | 151d04 | AV629456 | LCL059a09 |   |   | 6.0   | 6.2   | 6.1   | 1.1 | 0.3 | 1.0 | 0.1 |
| 6810 | 013d01 | AV638555 | HC087h04  |   |   | 3.3   | 6.2   | 6.3   | 2.0 | 0.5 | 1.0 | 0.3 |
| 6811 | 035g08 | BP097398 | MXL075a11 |   |   | 17.4  | 16.2  | 15.9  | 1.0 | 0.2 | 1.0 | 0.1 |
| 6812 | 171c10 | BP097847 | MXL082c06 |   |   | 36.9  | 38.1  | 37.5  | 1.0 | 0.1 | 1.0 | 0.2 |
| 6813 | 147d02 | AV627502 | LCL027f12 |   |   | 9.7   | 13.1  | 13.0  | 1.3 | 0.1 | 1.0 | 0.1 |
| 6814 | 036b11 | BP097912 | MXL083d10 |   |   | 118.0 | 56.0  | 67.7  | 0.5 | 0.3 | 1.0 | 0.8 |
| 6815 | 128f07 | AV642465 | HCL052d01 |   |   | 4.0   | 3.5   | 3.5   | 0.9 | 0.2 | 1.0 | 0.3 |
| 6816 | 155d08 | AV631414 | LCL093e05 |   |   | 51.9  | 62.7  | 63.7  | 1.2 | 0.1 | 1.0 | 0.3 |
| 6817 | 025a10 | AV627045 | LCL020c05 |   |   | 10.6  | 8.3   | 8.6   | 0.8 | 0.1 | 1.0 | 0.4 |
| 6818 | 018e12 | AV618992 | LC002d01  |   |   | 4.5   | 5.0   | 5.1   | 1.0 | 0.3 | 1.0 | 0.9 |
| 6819 | 151e06 | AV629545 | LCL060f12 |   |   | 9.1   | 8.3   | 8.2   | 0.9 | 0.2 | 1.0 | 0.2 |
| 6820 | 123d01 | AV639503 | HC100c01  |   |   | 9.9   | 9.6   | 10.1  | 1.0 | 0.3 | 1.0 | 0.5 |
| 6821 | 113g10 | AV397387 | CM070f10  |   |   | 8.3   | 5.9   | 5.8   | 0.7 | 0.2 | 1.0 | 0.4 |
| 6822 | 021f12 | AV622738 | LC053g07  |   |   | 10.6  | 10.1  | 10.2  | 1.0 | 0.1 | 1.0 | 0.3 |
| 6823 | 113e12 | AV397364 | CM068h03  |   |   | 14.6  | 14.8  | 16.0  | 1.0 | 0.2 | 1.0 | 0.3 |
| 6824 | 158h04 | BP087706 | MX041h02  |   |   | 16.9  | 12.6  | 13.4  | 0.8 | 0.3 | 1.0 | 0.6 |
| 6825 | 031h02 | BP087402 | MX033g07  |   |   | 5.3   | 4.2   | 4.3   | 0.8 | 0.2 | 1.0 | 0.4 |
| 6826 | 023b11 | AV624778 | LC082f01  |   |   | 23.2  | 19.6  | 19.7  | 0.9 | 0.1 | 1.0 | 0.2 |
| 6827 | 108a02 | AV387367 | CM014f06  |   |   | 4.8   | 6.5   | 6.5   | 1.4 | 0.4 | 1.0 | 0.2 |
| 6828 | 115h08 | AV391743 | CM093d01  |   |   | 64.3  | 40.3  | 40.5  | 0.7 | 0.2 | 1.0 | 0.2 |
| 6829 | 015a06 | AV640683 | HCL020e03 |   |   | 19.1  | 24.9  | 24.6  | 1.5 | 0.7 | 1.0 | 0.1 |
| 6830 | 134b02 | AV618999 | LC002d09  |   |   | 27.4  | 30.4  | 29.7  | 1.1 | 0.0 | 1.0 | 0.2 |
| 6831 | 028a06 | AV629570 | LCL061b11 |   |   | 3.9   | 2.9   | 2.9   | 0.7 | 0.1 | 1.0 | 0.3 |
| 6832 | 136c10 | AV620636 | LC024g02  |   |   | 6.3   | 5.2   | 5.1   | 0.8 | 0.2 | 1.0 | 0.2 |
| 6833 | 014c01 | AV639850 | HCL006b03 |   |   | 8.2   | 13.1  | 13.6  | 2.0 | 1.1 | 1.0 | 0.3 |
| 6834 | 118c02 | AV633607 | HC022h06  |   |   | 6.4   | 6.1   | 6.4   | 1.0 | 0.2 | 1.0 | 0.3 |
| 6835 | 015g09 | AV641420 | HCL033c11 |   |   | 0.8   | 1.2   | 1.2   | 1.6 | 1.1 | 1.0 | 0.6 |
| 6836 | 106a11 | AV396485 | CL74g03   |   |   | 2.5   | 3.0   | 3.1   | 1.2 | 0.1 | 1.0 | 0.3 |
| 6837 | 121e10 | AV637282 | HC071b01  |   |   | 17.7  | 12.6  | 13.1  | 0.7 | 0.1 | 1.0 | 0.3 |
| 6838 | 139d08 | BP383802 | LC058c09  |   |   | 11.0  | 20.0  | 19.7  | 1.9 | 0.6 | 1.0 | 0.1 |
| 6839 | 154c08 | AV630886 | LCL085g04 |   |   | 14.8  | 13.8  | 13.6  | 1.0 | 0.3 | 1.0 | 0.1 |
| 6840 | 163e10 | BP094361 | MXL022a01 |   |   | 6.2   | 4.9   | 4.9   | 0.9 | 0.3 | 1.0 | 0.2 |
| 6841 | 105a05 | AV396130 | CL56f12   |   |   | 5.0   | 6.6   | 6.5   | 1.4 | 0.2 | 1.0 | 0.2 |
| 6842 | 030b03 | AV631390 | LCL093b04 |   |   | 15.0  | 14.3  | 14.3  | 1.0 | 0.3 | 1.0 | 0.2 |
| 6843 | 005a07 | AV388209 | CM017h10  |   |   | 17.7  | 16.7  | 21.6  | 1.2 | 0.7 | 1.0 | 0.6 |
| 6844 | 146a03 | AV626937 | LCL018d12 |   |   | 9.9   | 6.4   | 6.3   | 0.7 | 0.1 | 1.0 | 0.2 |
| 6845 | 116e12 | AV393121 | CM100d08  |   |   |       |       |       |     |     |     |     |

|      | A      | B        | C         | D | E | F     | G     | H     | I   | J   | K   | L   |
|------|--------|----------|-----------|---|---|-------|-------|-------|-----|-----|-----|-----|
| 6846 | 126g03 | AV641445 | HCL033g01 |   |   | 7.8   | 7.2   | 7.2   | 0.9 | 0.1 | 1.0 | 0.3 |
| 6847 | 148h04 | AV628227 | LCL038g02 |   |   | 12.7  | 10.1  | 10.5  | 0.8 | 0.0 | 1.0 | 0.3 |
| 6848 | 153e11 | AV630550 | LCL080f02 |   |   | 10.3  | 11.5  | 12.4  | 1.1 | 0.1 | 1.0 | 0.5 |
| 6849 | 144d01 | AV626235 | LCL004h03 |   |   | 27.6  | 18.4  | 18.3  | 0.7 | 0.0 | 1.0 | 0.1 |
| 6850 | 004e12 | AV386964 | CM010d04  |   |   | 3.8   | 23.3  | 22.6  | 8.3 | 3.7 | 1.0 | 0.4 |
| 6851 | 123e08 | AV639621 | HCL002a06 |   |   | 5.0   | 4.5   | 4.5   | 0.9 | 0.1 | 1.0 | 0.2 |
| 6852 | 134f05 | AV619441 | LCO08d07  |   |   | 4.7   | 4.6   | 4.6   | 1.0 | 0.3 | 1.0 | 0.2 |
| 6853 | 113e09 | AV393256 | CM068f10  |   |   | 128.7 | 110.4 | 108.7 | 0.9 | 0.0 | 1.0 | 0.2 |
| 6854 | 011c07 | AV634595 | HC035d05  |   |   | 13.8  | 18.8  | 19.0  | 1.4 | 0.1 | 1.0 | 0.2 |
| 6855 | 019h03 | AV620325 | LCO20e12  |   |   | 6.4   | 7.3   | 7.1   | 1.1 | 0.1 | 1.0 | 0.1 |
| 6856 | 113e02 | AV393159 | CM068a08  |   |   | 50.4  | 47.4  | 48.0  | 1.0 | 0.1 | 1.0 | 0.3 |
| 6857 | 128f02 | AV642453 | HCL052b03 |   |   | 13.2  | 13.0  | 12.6  | 1.0 | 0.1 | 1.0 | 0.1 |
| 6858 | 022h09 | AV624429 | LCO77f07  |   |   | 127.9 | 134.6 | 146.6 | 1.1 | 0.2 | 1.0 | 0.4 |
| 6859 | 152h09 | AV630242 | LCL076a02 |   |   | 16.0  | 12.4  | 12.4  | 0.8 | 0.3 | 1.0 | 0.4 |
| 6860 | 135e06 | BP383779 | LCO16d01  |   |   | 9.8   | 10.2  | 10.6  | 1.0 | 0.2 | 1.0 | 0.4 |
| 6861 | 115a08 | AV390455 | CM083c12  |   |   | 85.8  | 70.8  | 71.1  | 0.8 | 0.1 | 1.0 | 0.3 |
| 6862 | 113f07 | AV387658 | CM069d05  |   |   | 16.1  | 15.5  | 15.5  | 1.0 | 0.1 | 1.0 | 0.2 |
| 6863 | 156e01 | BP086143 | MX002g01  |   |   | 89.9  | 156.9 | 159.6 | 1.7 | 0.2 | 1.0 | 0.4 |
| 6864 | 132d10 | AV644693 | HCL092d05 |   |   | 14.7  | 13.2  | 13.0  | 0.9 | 0.2 | 1.0 | 0.3 |
| 6865 | 120a05 | AV635655 | HC049b07  |   |   | 39.8  | 23.4  | 23.5  | 0.6 | 0.1 | 1.0 | 0.3 |
| 6866 | 147g01 | AV627663 | LCL030c03 |   |   | 28.2  | 26.5  | 26.8  | 0.9 | 0.1 | 1.0 | 0.2 |
| 6867 | 003h06 | AV397184 | CL79f10   |   |   | 4.6   | 5.0   | 5.0   | 1.1 | 0.2 | 1.0 | 0.3 |
| 6868 | 106c09 | AV397290 | CL77h10   |   |   | 40.3  | 35.1  | 34.6  | 0.9 | 0.1 | 1.0 | 0.1 |
| 6869 | 147g03 | AV627669 | LCL030c11 |   |   | 11.8  | 10.5  | 10.6  | 0.9 | 0.1 | 1.0 | 0.3 |
| 6870 | 105c05 | AV396390 | CL60f10   |   |   | 11.3  | 13.7  | 13.5  | 1.2 | 0.2 | 1.0 | 0.1 |
| 6871 | 149b08 | AV628373 | LCL040g04 |   |   | 12.2  | 9.0   | 9.3   | 0.7 | 0.1 | 1.0 | 0.3 |
| 6872 | 112h01 | AV392343 | CM060h12  |   |   | 4.4   | 4.2   | 4.1   | 1.0 | 0.2 | 1.0 | 0.2 |
| 6873 | 138f05 | AV622450 | LCO49h08  |   |   | 9.4   | 8.8   | 8.7   | 0.9 | 0.1 | 1.0 | 0.1 |
| 6874 | 165b07 | BP095106 | MXL035h09 |   |   | 16.6  | 21.5  | 21.2  | 1.3 | 0.2 | 1.0 | 0.1 |
| 6875 | 104c05 | AV395631 | CL46f02   |   |   | 26.0  | 27.5  | 26.6  | 1.1 | 0.0 | 1.0 | 0.2 |
| 6876 | 142g01 | AV625388 | LC091h06  |   |   | 52.2  | 41.4  | 42.3  | 0.8 | 0.1 | 1.0 | 0.3 |
| 6877 | 140c09 | AV623743 | LCO68a11  |   |   | 13.1  | 13.6  | 13.4  | 1.1 | 0.2 | 1.0 | 0.2 |
| 6878 | 011d07 | AV634829 | HC038e05  |   |   | 84.0  | 94.4  | 94.7  | 1.1 | 0.2 | 1.0 | 0.2 |
| 6879 | 137f03 | AV621746 | LCO40d08  |   |   | 14.4  | 9.4   | 10.8  | 0.7 | 0.2 | 1.0 | 0.5 |
| 6880 | 140h07 | AV624131 | LCO73d02  |   |   | 22.5  | 22.1  | 21.6  | 1.0 | 0.1 | 1.0 | 0.1 |
| 6881 | 013h07 | AV639624 | HCL002a09 |   |   | 13.4  | 12.5  | 12.3  | 0.9 | 0.3 | 1.0 | 0.3 |
| 6882 | 125d02 | AV640601 | HCL018h11 |   |   | 4.8   | 4.2   | 4.3   | 0.9 | 0.4 | 1.0 | 0.4 |
| 6883 | 169f01 | BP097036 | MXL069a06 |   |   | 261.7 | 237.4 | 235.5 | 0.9 | 0.0 | 1.0 | 0.3 |
| 6884 | 002a06 | AV394813 | CL28g10   |   |   | 11.1  | 11.1  | 10.9  | 1.0 | 0.2 | 1.0 | 0.2 |
| 6885 | 136b05 | AV620468 | LCO22e08  |   |   | 27.7  | 29.4  | 29.0  | 1.1 | 0.1 | 1.0 | 0.1 |
| 6886 | 146h03 | AV627273 | LCL024b09 |   |   | 18.2  | 15.6  | 15.4  | 0.9 | 0.2 | 1.0 | 0.1 |
| 6887 | 126f12 | AV641424 | HCL033d03 |   |   | 11.8  | 9.6   | 10.3  | 0.9 | 0.2 | 1.0 | 0.4 |
| 6888 | 013g05 | AV639348 | HC098c02  |   |   | 57.4  | 50.0  | 49.2  | 0.9 | 0.3 | 1.0 | 0.2 |
| 6889 | 157h03 | BP087190 | MX027g08  |   |   | 2.9   | 2.8   | 4.2   | 0.9 | 0.3 | 1.0 | 0.9 |
| 6890 | 129d09 | AV642854 | HCL059c12 |   |   | 8.7   | 6.9   | 6.8   | 0.8 | 0.1 | 1.0 | 0.0 |
| 6891 | 132b09 | AV644527 | HCL090a11 |   |   | 20.7  | 23.7  | 23.1  | 1.1 | 0.4 | 1.0 | 0.4 |
| 6892 | 017g09 | AV643676 | HCL074a04 |   |   | 6.3   | 8.7   | 9.8   | 1.3 | 0.6 | 1.0 | 0.8 |
| 6893 | 002f03 | AV395551 | CL43g10   |   |   | 5.1   | 5.5   | 5.6   | 1.1 | 0.3 | 1.0 | 0.4 |
| 6894 | 148f12 | AV628148 | LCL037e02 |   |   | 6.5   | 6.4   | 6.4   | 1.0 | 0.3 | 1.0 | 0.3 |
| 6895 | 108e12 | AV397510 | CM020e12  |   |   | 7.2   | 5.5   | 5.6   | 0.8 | 0.1 | 1.0 | 0.4 |
| 6896 | 119g05 | AV635359 | HC045d05  |   |   | 11.7  | 12.4  | 14.5  | 1.4 | 0.8 | 1.0 | 0.5 |
| 6897 | 005c05 | AV387931 | CM021h05  |   |   | 11.1  | 11.1  | 10.9  | 1.0 | 0.1 | 1.0 | 0.1 |
| 6898 | 102g02 | AV394699 | CL27a01   |   |   | 5.9   | 6.6   | 6.7   | 1.2 | 0.5 | 1.0 | 0.4 |
| 6899 | 111c10 | AV390389 | CM045h10  |   |   | 36.5  | 45.2  | 45.5  | 1.3 | 0.2 | 1.0 | 0.2 |
| 6900 | 151d01 | AV629429 | LCL058f04 |   |   | 22.9  | 15.7  | 16.2  | 0.7 | 0.1 | 1.0 | 0.2 |
| 6901 | 113g03 | AV389359 | CM070b08  |   |   | 4.8   | 5.5   | 5.4   | 1.1 | 0.2 | 1.0 | 0.2 |
| 6902 | 023c09 | AV624937 | LCO84g08  |   |   | 8.2   | 7.1   | 7.0   | 0.9 | 0.1 | 1.0 | 0.2 |
| 6903 | 119d11 | AV635046 | HC041c02  |   |   | 12.8  | 11.4  | 11.5  | 0.9 | 0.1 | 1.0 | 0.2 |
| 6904 | 101b01 | AV393325 | CL01g05   |   |   | 2.8   | 4.1   | 4.1   | 2.0 | 1.2 | 1.0 | 0.1 |
| 6905 | 016h10 | BP383733 | HCL056d07 |   |   | 10.5  | 8.8   | 8.5   | 0.8 | 0.5 | 1.0 | 0.6 |
| 6906 | 118c07 | AV633655 | HC023e12  |   |   | 28.5  | 21.3  | 20.6  | 0.7 | 0.1 | 1.0 | 0.1 |
| 6907 | 107c07 | AV386723 | CM008e07  |   |   | 133.2 | 132.0 | 129.5 | 1.0 | 0.0 | 1.0 | 0.1 |
| 6908 | 035f07 | BP097244 | MXL072d06 |   |   | 18.6  | 16.6  | 16.5  | 0.9 | 0.1 | 1.0 | 0.1 |
| 6909 | 113c07 | AV392898 | CM065c04  |   |   | 119.5 | 127.4 | 126.0 | 1.1 | 0.1 | 1.0 | 0.4 |
| 6910 | 118h06 | AV634352 | HC032c10  |   |   | 4.4   | 4.0   | 4.0   | 0.9 | 0.0 | 1.0 | 0.2 |
| 6911 | 134g03 | AV619495 | LCO09a12  |   |   | 10.3  | 10.0  | 9.9   | 1.0 | 0.4 | 1.0 | 0.1 |
| 6912 | 107g02 | AV387109 | CM012b11  |   |   | 9.0   | 11.8  | 12.3  | 1.4 | 0.7 | 1.0 | 0.2 |
| 6913 | 154f02 | AV631031 | LCL087h01 |   |   | 12.3  | 13.2  | 13.0  | 1.1 | 0.2 | 1.0 | 0.0 |
| 6914 | 015g08 | AV641419 | HCL033c10 |   |   | 8.9   | 10.5  | 10.5  | 1.2 | 0.3 | 1.0 | 0.4 |
| 6915 | 018a06 | AV644091 | HCL081f05 |   |   | 12.8  | 13.0  | 13.5  | 1.4 | 1.0 | 1.0 | 0.4 |
| 6916 | 147b11 | AV627420 | LCL026d10 |   |   | 10.7  | 12.6  | 12.2  | 1.2 | 0.2 | 1.0 | 0.3 |
| 6917 | 162e08 | BP093809 | MXL014b02 |   |   | 12.4  | 15.9  | 15.9  | 1.3 | 0.2 | 1.0 | 0.2 |
| 6918 | 172e11 | BP098437 | MXL093c08 |   |   | 7.4   | 24.2  | 23.6  | 3.8 | 2.5 | 1.0 | 0.4 |
| 6919 | 145g05 | AV626838 | LCL016c11 |   |   | 10.6  | 12.2  | 12.1  | 1.2 | 0.1 | 1.0 | 0.1 |
| 6920 | 129a12 | BP383732 | HCL055f01 |   |   | 19.1  | 17.9  | 21.1  | 0.9 | 0.2 | 1.0 | 0.6 |
| 6921 | 122d10 | AV638271 | HC084b08  |   |   | 180.8 | 170.4 | 185.8 | 1.0 | 0.1 | 1.0 | 0.3 |
| 6922 | 114e07 | AV388588 | CM078a12  |   |   | 139.8 | 141.3 | 136.7 | 1.0 | 0.1 | 1.0 | 0.3 |
| 6923 | 110b07 | AV388947 | CM033g10  |   |   | 5.6   | 4.3   | 4.2   | 0.8 | 0.1 | 1.0 | 0.2 |
| 6924 | 119b02 | AV634603 | HC035e02  |   |   | 6.2   | 5.5   | 5.4   | 0.9 | 0.1 | 1.0 | 0.2 |
| 6925 | 137e09 | AV621685 | LCO39f05  |   |   | 5.5   | 11.2  | 11.1  | 2.1 | 0.4 | 1.0 | 0.1 |
| 6926 | 142d07 | AV625164 | LC088f12  |   |   | 6.7   | 5.8   | 5.6   | 0.9 | 0.2 | 1.0 | 0.1 |
| 6927 | 162e05 | BP093767 | MXL013d12 |   |   | 38.3  | 44.9  | 44.5  | 1.2 | 0.1 | 1.0 | 0.1 |
| 6928 | 134g12 | AV619545 | LCO09g10  |   |   | 4.3   | 5.1   | 5.1   | 1.2 | 0.1 | 1.0 | 0.2 |
| 6929 | 153c07 | AV630423 | LCL078f06 |   |   | 7.3   | 6.2   | 6.1   | 0.9 | 0.2 | 1.0 | 0.1 |
| 6930 | 130c11 | BP383742 | HCL068f08 |   |   | 49.0  | 33.0  | 32.5  | 0.7 | 0.2 | 1.0 | 0.1 |
| 6931 | 101b09 | AV397620 | CL02g03   |   |   | 6.8   | 6.7   | 9.3   | 1.0 | 0.1 | 1.0 | 0.7 |
| 6932 | 128f10 | AV642478 | HCL052e07 |   |   | 14.0  | 14.3  | 14.3  | 1.0 | 0.2 | 1.0 | 0.2 |
| 6933 | 142b05 | AV624958 | LC085a09  |   |   | 18.9  | 21.6  | 21.2  | 1.1 | 0.1 | 1.0 | 0.0 |
| 6934 | 134a03 | AV618902 | LCO01b03  |   |   | 9.1   | 8.2   | 8.3   | 0.9 | 0.2 | 1.0 | 0.2 |
| 6935 | 025g06 | AV627799 | LCL032b12 |   |   | 12.3  | 19.7  | 19.4  | 1.6 | 0.1 | 1.0 | 0.0 |
| 6936 | 123g01 | AV639738 | HCL004a11 |   |   | 15.8  | 14.6  | 14.3  | 0.9 | 0.2 | 1.0 | 0.1 |
| 6937 | 162h07 | BP093991 | MXL016f07 |   |   | 6.5   | 5.3   | 9.6   | 0.7 | 0.5 | 1.0 | 1.1 |
| 6938 | 158f04 | BP087673 | MX041b02  |   |   | 89.7  | 68.9  | 69.9  | 0.8 | 0.2 | 1.0 | 0.3 |
| 6939 | 008d04 | AV397514 | CM069a11  |   |   | 28.1  | 21.1  | 23.2  | 0.7 | 0.3 | 1.0 | 0.6 |
| 6940 | 119e04 | AV635077 | HC041f01  |   |   | 104.9 | 100.6 | 105.6 | 1.0 | 0.1 | 1.0 | 0.3 |
| 6941 | 008g08 | AV389537 | CM076c11  |   |   | 20.8  | 18.7  | 18.4  | 0.9 | 0.1 | 1.0 | 0.1 |
| 6942 | 151g01 | AV629633 | LCL062d06 |   |   | 31.0  | 23.8  | 24.3  | 0.8 | 0.1 | 1.0 | 0.2 |
| 6943 | 029e02 | AV630878 | LCL085f02 |   |   | 30.7  | 24.8  | 33.1  | 0.8 | 0.0 | 1.0 | 0.6 |
| 6944 | 126d07 | AV641257 | HCL030f03 |   |   | 43.9  | 51.1  | 54.1  | 1.2 | 0.4 | 1.0 | 0.5 |
| 6945 | 165d12 | BP095207 | MXL038a09 |   |   | 13.9  | 19.1  | 18.7  | 1.4 | 0.1 | 1.0 | 0.1 |
| 6946 | 138d10 | AV622268 | LC047d04  |   |   | 63.5  | 55.9  | 60.0  | 0.9 | 0.2 | 1.0 | 0.4 |
| 6947 | 134d07 | AV619220 | LCO05c11  |   |   | 18.2  | 18.0  | 17.9  | 1.0 | 0.0 | 1.0 | 0.1 |
| 6948 | 146d03 | AV627078 | LCL020g03 |   |   | 10.6  | 11.2  | 11.6  | 1.1 | 0.2 | 1.0 | 0.3 |
| 6949 | 136f01 | AV620775 | LCO26f08  |   |   | 19.7  | 23.1  | 22.4  | 1.2 | 0.1 | 1.0 | 0.2 |
| 6950 | 152e07 | AV630014 | LCL071a09 |   |   | 4.9   | 4.2   | 4.2   | 0.9 | 0.2 | 1.0 | 0.2 |
| 6951 | 114d07 | AV389719 | CM076f01  |   |   | 5.0   | 4.6   | 4.6   | 1.0 | 0.2 | 1.0 | 0.1 |
| 6952 | 1      |          |           |   |   |       |       |       |     |     |     |     |

|      | A      | B        | C         | D  | E | F     | G     | H     | I   | J   | K   | L   |
|------|--------|----------|-----------|----|---|-------|-------|-------|-----|-----|-----|-----|
| 6953 | 162f10 | BP093882 | MXL015b02 |    |   | 14.2  | 9.2   | 9.1   | 0.6 | 0.2 | 1.0 | 0.3 |
| 6954 | 167h01 | BP096222 | MXL054h01 |    |   | 10.8  | 7.9   | 12.7  | 0.7 | 0.6 | 1.0 | 1.1 |
| 6955 | 033h02 | BP094987 | MXL033h06 |    |   | 7.6   | 9.0   | 9.3   | 1.2 | 0.5 | 1.0 | 0.4 |
| 6956 | 101f11 | AV393914 | CL13b11   |    |   | 2.9   | 3.3   | 3.4   | 1.2 | 0.2 | 1.0 | 0.3 |
| 6957 | 147f02 | AV627609 | LCL029d10 |    |   | 63.2  | 54.7  | 54.3  | 0.9 | 0.0 | 1.0 | 0.1 |
| 6958 | 104f05 | AV395878 | CL52a04   |    |   | 40.5  | 40.3  | 41.0  | 1.0 | 0.3 | 1.0 | 0.4 |
| 6959 | 144d07 | AV626246 | LCL005a08 |    |   | 41.1  | 44.8  | 43.9  | 1.1 | 0.1 | 1.0 | 0.1 |
| 6960 | 008c04 | AV393147 | CM068a05  |    |   | 5.9   | 6.0   | 6.1   | 1.0 | 0.1 | 1.0 | 0.2 |
| 6961 | 154d07 | AV630956 | LCL086h01 |    |   | 17.6  | 15.8  | 15.8  | 1.0 | 0.3 | 1.0 | 0.2 |
| 6962 | 127a06 | AV641611 | HCL037d05 |    |   | 10.9  | 9.7   | 9.6   | 0.9 | 0.2 | 1.0 | 0.1 |
| 6963 | 140e04 | AV623867 | LC069g05  |    |   | 292.6 | 268.0 | 296.8 | 1.0 | 0.2 | 1.0 | 0.4 |
| 6964 | 161f09 | BP093263 | MXL005h02 |    |   | 12.3  | 9.6   | 9.8   | 0.7 | 0.2 | 1.0 | 0.5 |
| 6965 | 018a07 | AV644093 | HCL081f09 |    |   | 4.8   | 6.4   | 6.5   | 1.4 | 0.7 | 1.0 | 0.5 |
| 6966 | 036d10 | BP098252 | MXL090b12 |    |   | 6.8   | 6.2   | 6.8   | 0.9 | 0.1 | 1.0 | 0.4 |
| 6967 | 107a10 | AV386793 | CM007a03  |    |   | 111.6 | 106.1 | 103.0 | 0.9 | 0.2 | 1.0 | 0.6 |
| 6968 | 119a08 | AV634553 | HC034h04  |    |   | 10.8  | 11.8  | 11.6  | 1.1 | 0.1 | 1.0 | 0.0 |
| 6969 | 147f08 | AV627642 | LCL029h08 |    |   | 11.4  | 20.3  | 20.0  | 1.8 | 0.6 | 1.0 | 0.2 |
| 6970 | 123c03 | AV639414 | HC099a07  |    |   | 51.0  | 30.7  | 37.7  | 0.6 | 0.3 | 1.0 | 0.8 |
| 6971 | 151b04 | AV629344 | LCL057a02 |    |   | 15.7  | 13.3  | 14.4  | 0.9 | 0.1 | 1.0 | 0.4 |
| 6972 | 025b06 | AV627137 | LCL021f12 |    |   | 21.0  | 15.0  | 18.9  | 0.8 | 0.2 | 1.0 | 0.5 |
| 6973 | 032c12 | BP093149 | MXL004b08 |    |   | 8.4   | 8.7   | 8.7   | 1.1 | 0.2 | 1.0 | 0.3 |
| 6974 | 118c12 | AV633700 | HC024b07  |    |   | 8.4   | 5.2   | 5.2   | 0.6 | 0.1 | 1.0 | 0.2 |
| 6975 | 151h03 | AV629710 | LCL064b11 |    |   | 16.6  | 11.1  | 11.7  | 0.7 | 0.1 | 1.0 | 0.4 |
| 6976 | 101a08 | AV393341 | CL01d08   |    |   | 16.8  | 16.0  | 18.3  | 1.0 | 0.3 | 1.0 | 0.5 |
| 6977 | 009a07 | AV390217 | CM082d03  |    |   | 20.4  | 21.6  | 23.7  | 1.1 | 0.4 | 1.0 | 0.4 |
| 6978 | 147d05 | AV627520 | LCL027h12 |    |   | 14.6  | 14.1  | 13.9  | 1.0 | 0.1 | 1.0 | 0.0 |
| 6979 | 013c11 | AV638473 | HC086g11  |    |   | 42.4  | 42.6  | 42.2  | 1.0 | 0.1 | 1.0 | 0.1 |
| 6980 | 112c01 | AV391605 | CM055c12  |    |   | 18.6  | 24.9  | 26.0  | 1.3 | 0.3 | 1.0 | 0.5 |
| 6981 | 118g09 | AV634245 | HC031a01  |    |   | 34.8  | 27.0  | 26.2  | 0.8 | 0.2 | 1.0 | 0.3 |
| 6982 | 150b11 | AV628914 | LCL048h08 |    |   | 9.4   | 10.0  | 10.0  | 1.1 | 0.1 | 1.0 | 0.1 |
| 6983 | 150a03 | AV628776 | LCL046h06 |    |   | 22.4  | 18.4  | 20.2  | 0.8 | 0.1 | 1.0 | 0.4 |
| 6984 | 105c02 | AV397919 | CL59h12   |    |   | 8.2   | 10.6  | 11.6  | 1.4 | 0.4 | 1.0 | 0.3 |
| 6985 | 117d11 | AV632731 | HC011h08  |    |   | 5.4   | 4.8   | 4.8   | 0.9 | 0.2 | 1.0 | 0.1 |
| 6986 | 125h01 | AV640818 | HCL022h06 |    |   | 7.5   | 6.0   | 6.4   | 0.8 | 0.0 | 1.0 | 0.4 |
| 6987 | 137d07 | AV621530 | LC037c12  |    |   | 9.0   | 7.8   | 7.6   | 0.9 | 0.2 | 1.0 | 0.2 |
| 6988 | 130h11 | BP383746 | HCL075d07 |    |   | 14.1  | 12.2  | 12.9  | 0.9 | 0.2 | 1.0 | 0.3 |
| 6989 | 152a03 | AV629745 | LCL065b02 |    |   | 4.1   | 3.7   | 3.7   | 0.9 | 0.3 | 1.0 | 0.1 |
| 6990 | 022f09 | AV624108 | LC073a08  |    |   | 12.6  | 11.3  | 11.2  | 0.9 | 0.2 | 1.0 | 0.2 |
| 6991 | 025b11 | AV627163 | LCL022a11 |    |   | 13.3  | 8.3   | 8.2   | 0.6 | 0.1 | 1.0 | 0.1 |
| 6992 | 002h09 | AV395926 | CL51f10   |    |   | 17.5  | 18.4  | 18.0  | 1.0 | 0.2 | 1.0 | 0.1 |
| 6993 | 014e02 | AV640084 | HCL010a10 |    |   | 35.8  | 37.3  | 41.1  | 1.1 | 0.3 | 1.0 | 0.4 |
| 6994 | 128g01 | AV642482 | HCL052f02 |    |   | 4.7   | 4.6   | 4.9   | 1.0 | 0.2 | 1.0 | 0.3 |
| 6995 | 166f11 | BP095733 | MXL046e10 |    |   | 25.6  | 26.6  | 26.6  | 1.0 | 0.0 | 1.0 | 0.3 |
| 6996 | 028h08 | AV630394 | LCL078b12 |    |   | 6.7   | 4.5   | 4.5   | 0.7 | 0.1 | 1.0 | 0.2 |
| 6997 | 133a11 | AV644953 | HCL095h07 |    |   | 10.9  | 10.8  | 11.1  | 1.0 | 0.2 | 1.0 | 0.4 |
| 6998 | 017d02 | AV643165 | HCL064h07 |    |   | 1.8   | 1.8   | 1.9   | 1.1 | 0.2 | 1.0 | 0.2 |
| 6999 | 116d04 | AV392694 | CM098h11  |    |   | 22.7  | 17.0  | 17.3  | 0.8 | 0.1 | 1.0 | 0.3 |
| 7000 | 152d01 | AV629923 | LCL069b06 |    |   | 27.7  | 24.2  | 27.1  | 0.9 | 0.3 | 1.0 | 0.6 |
| 7001 | 017g06 | AV643646 | HCL073c10 |    |   | 7.7   | 7.4   | 7.3   | 1.0 | 0.1 | 1.0 | 0.0 |
| 7002 | 153b01 | AV630316 | LCL077b07 |    |   | 89.3  | 71.6  | 71.6  | 0.8 | 0.4 | 1.0 | 0.4 |
| 7003 | 159f03 | BP087913 | MX046f03  |    |   | 9.4   | 8.4   | 8.6   | 0.9 | 0.1 | 1.0 | 0.3 |
| 7004 | 021b04 | AV621999 | LC043g01  |    |   | 6.7   | 7.6   | 7.6   | 1.3 | 0.6 | 1.0 | 0.2 |
| 7005 | 017e05 | AV643289 | HCL067a08 |    |   | 3.1   | 3.5   | 3.5   | 1.1 | 0.2 | 1.0 | 0.5 |
| 7006 | 156h06 | BP086409 | MX008c02  |    |   | 21.8  | 22.8  | 27.5  | 1.1 | 0.7 | 1.0 | 0.8 |
| 7007 | 118b03 | AV633452 | HC020h12  |    |   | 37.4  | 48.0  | 49.6  | 1.4 | 0.4 | 1.0 | 0.2 |
| 7008 | 124d01 | AV640110 | HCL010e12 |    |   | 6.3   | 6.2   | 6.2   | 1.0 | 0.2 | 1.0 | 0.2 |
| 7009 | 162d06 | BP093691 | MXL012a12 |    |   | 7.8   | 9.9   | 9.8   | 1.3 | 0.2 | 1.0 | 0.2 |
| 7010 | 142h06 | AV625505 | LC093h01  |    |   | 4.4   | 6.4   | 6.3   | 1.6 | 0.4 | 1.0 | 0.1 |
| 7011 | 171g09 | BP098090 | MXL086h03 |    |   | 86.5  | 49.9  | 49.5  | 0.7 | 0.3 | 1.0 | 0.2 |
| 7012 | 170g06 | BP097583 | MXL078a11 |    |   | 4.0   | 4.6   | 5.3   | 1.1 | 0.5 | 1.0 | 0.8 |
| 7013 | 008h02 | AV388020 | CM077c01  |    |   | 3.6   | 3.6   | 3.6   | 1.0 | 0.3 | 1.0 | 0.3 |
| 7014 | 105b02 | AV396259 | CL57h06   |    |   | 65.9  | 68.3  | 67.7  | 1.0 | 0.1 | 1.0 | 0.0 |
| 7015 | 109b09 | AV388289 | CM024d09  |    |   | 8.7   | 9.0   | 9.1   | 1.0 | 0.0 | 1.0 | 0.3 |
| 7016 | 116d10 | AV393292 | CM099d12  |    |   | 7.4   | 7.9   | 8.3   | 1.1 | 0.2 | 1.0 | 0.2 |
| 7017 | 161f11 | BP093271 | MXL005h10 |    |   | 15.3  | 14.2  | 14.0  | 1.0 | 0.4 | 1.0 | 0.2 |
| 7018 | 165e08 | BP095242 | MXL038f10 |    |   | 6.9   | 9.3   | 9.8   | 1.4 | 0.2 | 1.0 | 0.3 |
| 7019 | 149d02 | AV628465 | LCL042c09 |    |   | 4.4   | 4.0   | 4.1   | 0.9 | 0.1 | 1.0 | 0.2 |
| 7020 | 102c04 | AV394297 | CL20e02   |    |   | 7.2   | 8.1   | 8.6   | 1.1 | 0.2 | 1.0 | 0.3 |
| 7021 | 121a02 | AV636582 | HC061d08  |    |   | 7.9   | 8.3   | 8.2   | 1.1 | 0.0 | 1.0 | 0.1 |
| 7022 | 002c01 | AV394928 | CL34d03   |    |   | 12.0  | 24.1  | 25.5  | 2.2 | 0.8 | 1.0 | 0.3 |
| 7023 | 020b07 | AV620799 | LC027a06  |    |   | 12.6  | 10.6  | 10.5  | 0.9 | 0.3 | 1.0 | 0.1 |
| 7024 | 148c01 | AV627883 | LCL033c12 |    |   | 11.7  | 9.9   | 9.8   | 0.9 | 0.2 | 1.0 | 0.2 |
| 7025 | 109g12 | AV388486 | CM030a02  |    |   | 33.6  | 30.8  | 29.8  | 0.9 | 0.2 | 1.0 | 0.3 |
| 7026 | 009h09 | AV631901 | HC001e03  |    |   | 14.9  | 12.6  | 12.6  | 0.8 | 0.1 | 1.0 | 0.2 |
| 7027 | 105f03 | AV396730 | CL66d06   |    |   | 17.6  | 14.5  | 14.3  | 0.8 | 0.2 | 1.0 | 0.1 |
| 7028 | 111b05 | AV390202 | CM043h01  |    |   | 16.3  | 13.5  | 13.7  | 0.8 | 0.1 | 1.0 | 0.2 |
| 7029 | 153c04 | AV630392 | LCL078b09 |    |   | 25.6  | 22.4  | 22.7  | 1.0 | 0.4 | 1.0 | 0.1 |
| 7030 | 135a12 | AV619683 | LC011g01  |    |   | 9.6   | 9.6   | 9.6   | 1.0 | 0.1 | 1.0 | 0.1 |
| 7031 | 123e04 | AV639615 | HCL001h09 |    |   | 10.3  | 10.6  | 10.5  | 1.0 | 0.2 | 1.0 | 0.2 |
| 7032 | 137b01 | AV621213 | LC032g08  |    |   | 5.2   | 3.6   | 3.9   | 0.7 | 0.1 | 1.0 | 0.4 |
| 7033 | 146g10 | AV627251 | LCL023g05 |    |   | 10.4  | 9.5   | 9.2   | 0.9 | 0.2 | 1.0 | 0.1 |
| 7034 | 005b09 | AV397471 | CM020d11  |    |   | 18.4  | 21.1  | 20.8  | 1.2 | 0.2 | 1.0 | 0.1 |
| 7035 | 163h12 | BP094579 | MXL025c01 |    |   | 13.4  | 12.1  | 19.8  | 1.0 | 0.4 | 1.0 | 0.8 |
| 7036 | 017h09 | AV643964 | HCL079c02 |    |   | 6.0   | 7.6   | 7.5   | 1.3 | 0.7 | 1.0 | 0.4 |
| 7037 | 139g10 | AV623388 | LC063a08  |    |   | 11.4  | 13.8  | 16.4  | 1.1 | 0.3 | 1.0 | 0.7 |
| 7038 | 108d10 | AV387272 | CM018h09  |    |   | 5.1   | 5.0   | 5.1   | 1.0 | 0.2 | 1.0 | 0.3 |
| 7039 | 148d09 | AV628013 | LCL035c12 |    |   | 5.7   | 5.0   | 5.2   | 0.9 | 0.1 | 1.0 | 0.3 |
| 7040 | 111h05 | AV391230 | CM051g11  |    |   | 100.7 | 104.8 | 105.1 | 1.0 | 0.1 | 1.0 | 0.3 |
| 7041 | 121h06 | AV637674 | HC076b01  |    |   | 26.7  | 24.4  | 24.8  | 0.9 | 0.1 | 1.0 | 0.3 |
| 7042 | 109g08 | AV388453 | CM029f12  |    |   | 163.7 | 145.7 | 142.1 | 0.9 | 0.2 | 1.0 | 0.5 |
| 7043 | 029e06 | AV630915 | LCL086c06 |    |   | 2.1   | 1.4   | 1.4   | 0.7 | 0.3 | 1.0 | 0.4 |
| 7044 | 104b05 | AV397781 | CL45a05   |    |   | 107.8 | 87.2  | 89.9  | 0.9 | 0.4 | 1.0 | 0.2 |
| 7045 | 107e04 | AV386962 | CM010c04  |    |   | 11.0  | 11.0  | 11.0  | 1.0 | 0.1 | 1.0 | 0.0 |
| 7046 | 149h08 | AV628720 | LCL046b07 |    |   | 8.9   | 9.4   | 9.7   | 1.1 | 0.4 | 1.0 | 0.4 |
| 7047 | 008b05 | AV392952 | CM065h12  |    |   | 9.3   | 7.7   | 7.6   | 0.9 | 0.2 | 1.0 | 0.2 |
| 7048 | 101e11 | AV393767 | CL11a09   |    |   | 9.3   | 8.0   | 13.4  | 0.9 | 0.1 | 1.0 | 0.9 |
| 7049 | 137f08 | AV621777 | LC040g09  |    |   | 12.0  | 9.0   | 9.0   | 0.8 | 0.2 | 1.0 | 0.1 |
| 7050 | 128f05 | AV642457 | HCL052b10 |    |   | 13.8  | 13.1  | 13.7  | 0.9 | 0.2 | 1.0 | 0.5 |
| 7051 | 031c02 | BP086659 | MX013h01  |    |   | 10.1  | 8.1   | 8.3   | 0.8 | 0.1 | 1.0 | 0.3 |
| 7052 | 146g08 | AV627240 | LCL023d09 |    |   | 13.5  | 10.3  | 10.3  | 0.8 | 0.3 | 1.0 | 0.2 |
| 7053 | 014g10 | AV640459 | HCL016f07 |    |   | 7.9   | 9.0   | 9.8   | 1.1 | 0.4 | 1.0 | 0.7 |
| 7054 | 113h12 | AV388681 | CM071h12  |    |   | 7.7   | 9.4   | 9.8   | 1.2 | 0.1 | 1.0 | 0.4 |
| 7055 | 169c10 | BP096920 | MXL067b03 |    |   | 15.4  | 14.5  | 15.4  | 1.0 | 0.4 | 1.0 | 0.4 |
| 7056 | 135a07 | AV619651 | LC011c09  |    |   | 15.2  | 12.5  | 12.3  | 0.8 | 0.1 | 1.0 | 0.3 |
| 7057 | 134b08 | AV619020 | LC002f11  |    |   | 22.1  | 18.6  | 20.2  | 0.8 | 0.2 | 1.0 | 0.5 |
| 7058 | 139h07 | AV623447 | LC063h08  |    |   | 9.4   | 8.2   | 9.1   | 0.9 | 0.3 | 1.0 | 0.6 |
| 7059 | 111f08 | AV391006 | CM049d10  | </ |   |       |       |       |     |     |     |     |

|      | A      | B        | C         | D | E | F     | G     | H     | I   | J   | K   | L   |
|------|--------|----------|-----------|---|---|-------|-------|-------|-----|-----|-----|-----|
| 7060 | 127f10 | AV641954 | HCL043a05 |   |   | 42.1  | 41.1  | 40.5  | 1.1 | 0.6 | 1.0 | 0.1 |
| 7061 | 121f05 | AV637351 | HC072a09  |   |   | 31.8  | 33.8  | 34.0  | 1.1 | 0.2 | 1.0 | 0.2 |
| 7062 | 026b04 | AV628107 | LCL036g10 |   |   | 8.8   | 9.7   | 9.8   | 1.1 | 0.2 | 1.0 | 0.1 |
| 7063 | 122b08 | AV637925 | HC079d11  |   |   | 4.6   | 3.8   | 4.0   | 0.8 | 0.1 | 1.0 | 0.4 |
| 7064 | 033f11 | BP094760 | MXL028h12 |   |   | 12.6  | 11.3  | 11.9  | 0.9 | 0.2 | 1.0 | 0.3 |
| 7065 | 122h08 | AV639024 | HC094a02  |   |   | 10.3  | 10.8  | 11.1  | 1.1 | 0.3 | 1.0 | 0.2 |
| 7066 | 034a04 | BP095159 | MXL036h01 |   |   | 9.1   | 7.0   | 7.1   | 0.8 | 0.3 | 1.0 | 0.3 |
| 7067 | 132f06 | AV644780 | HCL093f09 |   |   | 5.1   | 4.5   | 4.4   | 0.9 | 0.2 | 1.0 | 0.2 |
| 7068 | 166c07 | BP095553 | MXL043g01 |   |   | 14.1  | 16.1  | 16.1  | 1.2 | 0.5 | 1.0 | 0.1 |
| 7069 | 108g12 | AV387846 | CM022b01  |   |   | 4.6   | 4.8   | 4.7   | 1.0 | 0.4 | 1.0 | 0.1 |
| 7070 | 129f09 | AV642989 | HCL061g04 |   |   | 6.9   | 6.9   | 7.1   | 1.0 | 0.1 | 1.0 | 0.2 |
| 7071 | 163g03 | BP094465 | MXL023e02 |   |   | 6.8   | 4.8   | 5.4   | 0.7 | 0.3 | 1.0 | 0.7 |
| 7072 | 123e09 | AV639625 | HCL002a10 |   |   | 19.5  | 16.2  | 18.4  | 0.8 | 0.2 | 1.0 | 0.5 |
| 7073 | 030c12 | AV631544 | LCL096a01 |   |   | 5.8   | 5.5   | 5.6   | 1.0 | 0.2 | 1.0 | 0.2 |
| 7074 | 005g05 | AV388339 | CM028h07  |   |   | 5.6   | 6.4   | 6.4   | 1.1 | 0.1 | 1.0 | 0.3 |
| 7075 | 115d01 | AV390109 | CM086g02  |   |   | 9.0   | 16.3  | 16.7  | 1.8 | 0.2 | 1.0 | 0.2 |
| 7076 | 112b08 | AV391535 | CM055a12  |   |   | 12.5  | 12.1  | 12.1  | 1.0 | 0.0 | 1.0 | 0.2 |
| 7077 | 029f03 | AV630947 | LCL086g02 |   |   | 12.5  | 13.7  | 13.7  | 1.1 | 0.2 | 1.0 | 0.2 |
| 7078 | 035f06 | BP097238 | MXL072c07 |   |   | 13.6  | 10.7  | 10.7  | 0.8 | 0.1 | 1.0 | 0.2 |
| 7079 | 118g12 | AV634277 | HC031d02  |   |   | 8.8   | 5.3   | 5.5   | 0.6 | 0.1 | 1.0 | 0.3 |
| 7080 | 101h07 | AV394130 | CL17a07   |   |   | 3.3   | 2.1   | 2.2   | 0.7 | 0.2 | 1.0 | 0.3 |
| 7081 | 112f02 | AV392050 | CM058b07  |   |   | 8.8   | 7.1   | 7.3   | 0.8 | 0.2 | 1.0 | 0.3 |
| 7082 | 013g11 | AV639572 | HCL001b10 |   |   | 7.2   | 6.6   | 6.9   | 0.9 | 0.2 | 1.0 | 0.5 |
| 7083 | 034e03 | BP095862 | MXL048a03 |   |   | 6.2   | 5.2   | 5.9   | 0.8 | 0.2 | 1.0 | 0.6 |
| 7084 | 013e06 | AV638814 | HC091b08  |   |   | 9.7   | 8.4   | 8.5   | 0.9 | 0.1 | 1.0 | 0.1 |
| 7085 | 129d10 | AV642864 | HCL059e06 |   |   | 16.9  | 16.4  | 16.4  | 1.0 | 0.1 | 1.0 | 0.1 |
| 7086 | 132a12 | AV644462 | HCL089a06 |   |   | 10.0  | 9.7   | 9.8   | 1.0 | 0.1 | 1.0 | 0.3 |
| 7087 | 149d08 | AV628477 | LCL042e03 |   |   | 13.8  | 11.9  | 13.0  | 0.9 | 0.1 | 1.0 | 0.2 |
| 7088 | 028c04 | AV629808 | LCL066e05 |   |   | 9.5   | 7.4   | 7.8   | 0.8 | 0.1 | 1.0 | 0.3 |
| 7089 | 109c10 | AV388081 | CM025d04  |   |   | 8.5   | 7.0   | 7.0   | 0.8 | 0.2 | 1.0 | 0.1 |
| 7090 | 151b10 | AV629374 | LCL057f02 |   |   | 6.8   | 5.7   | 5.7   | 0.8 | 0.0 | 1.0 | 0.2 |
| 7091 | 145e05 | AV626722 | LCL014c11 |   |   | 5.9   | 9.1   | 9.0   | 1.6 | 0.6 | 1.0 | 0.3 |
| 7092 | 027e04 | AV629233 | LCL054h08 |   |   | 24.1  | 13.5  | 13.3  | 0.6 | 0.1 | 1.0 | 0.1 |
| 7093 | 018b09 | AV644229 | HCL084d06 |   |   | 4.2   | 3.8   | 4.0   | 0.9 | 0.3 | 1.0 | 0.6 |
| 7094 | 148a03 | AV627779 | LCL031h07 |   |   | 49.9  | 38.1  | 42.6  | 0.8 | 0.1 | 1.0 | 0.3 |
| 7095 | 143c03 | AV625637 | LC095g07  |   |   | 16.7  | 15.1  | 16.5  | 0.9 | 0.3 | 1.0 | 0.5 |
| 7096 | 105d12 | AV396523 | CL83f03   |   |   | 9.5   | 8.0   | 8.4   | 0.8 | 0.1 | 1.0 | 0.3 |
| 7097 | 167h05 | BP096229 | MXL054h10 |   |   | 5.6   | 5.1   | 6.8   | 0.8 | 0.4 | 1.0 | 1.0 |
| 7098 | 138g11 | AV622583 | LC051e11  |   |   | 16.8  | 15.5  | 16.7  | 1.0 | 0.3 | 1.0 | 0.3 |
| 7099 | 108h08 | AV387882 | CM022g02  |   |   | 20.4  | 14.4  | 14.6  | 0.7 | 0.1 | 1.0 | 0.2 |
| 7100 | 142d04 | AV625126 | LC088c02  |   |   | 32.3  | 34.4  | 35.6  | 1.2 | 0.4 | 1.0 | 0.3 |
| 7101 | 137d02 | AV621506 | LC037a06  |   |   | 14.4  | 6.6   | 6.6   | 0.5 | 0.2 | 1.0 | 0.2 |
| 7102 | 101f10 | AV393896 | CL13b03   |   |   | 3.8   | 4.7   | 4.8   | 1.3 | 0.6 | 1.0 | 0.3 |
| 7103 | 117h10 | AV633265 | HC018g01  |   |   | 13.1  | 7.2   | 7.3   | 0.6 | 0.2 | 1.0 | 0.3 |
| 7104 | 110f05 | AV389619 | CM038e02  |   |   | 9.8   | 7.2   | 7.2   | 0.7 | 0.1 | 1.0 | 0.1 |
| 7105 | 128c10 | AV642280 | HCL048h08 |   |   | 8.8   | 7.3   | 7.4   | 0.9 | 0.2 | 1.0 | 0.2 |
| 7106 | 149e12 | AV628539 | LCL043e02 |   |   | 3.6   | 3.7   | 3.8   | 1.0 | 0.1 | 1.0 | 0.1 |
| 7107 | 027b09 | AV628969 | LCL049g03 |   |   | 13.1  | 9.8   | 11.1  | 0.7 | 0.2 | 1.0 | 0.6 |
| 7108 | 166b09 | BP095497 | MXL042g03 |   |   | 18.9  | 22.9  | 26.0  | 1.5 | 0.7 | 1.0 | 0.5 |
| 7109 | 002g10 | AV397754 | CL49f12   |   |   | 2.6   | 2.8   | 3.1   | 1.1 | 0.1 | 1.0 | 0.6 |
| 7110 | 167e03 | BP096079 | MXL052c05 |   |   | 15.5  | 15.1  | 15.2  | 1.0 | 0.2 | 1.0 | 0.2 |
| 7111 | 145b10 | AV626553 | LCL011b07 |   |   | 31.3  | 17.4  | 17.7  | 0.5 | 0.2 | 1.0 | 0.5 |
| 7112 | 123c02 | AV639389 | HC098g03  |   |   | 5.1   | 5.1   | 5.1   | 1.0 | 0.1 | 1.0 | 0.1 |
| 7113 | 123h09 | AV639875 | HCL006e06 |   |   | 8.5   | 10.5  | 10.7  | 1.2 | 0.1 | 1.0 | 0.2 |
| 7114 | 006c06 | AV389582 | CM038d08  |   |   | 4.6   | 6.3   | 6.5   | 1.4 | 0.1 | 1.0 | 0.2 |
| 7115 | 028d04 | AV629899 | LCL068e12 |   |   | 1.7   | 1.3   | 1.4   | 0.8 | 0.3 | 1.0 | 0.4 |
| 7116 | 036b03 | BP097788 | MXL081d06 |   |   | 21.9  | 15.7  | 15.8  | 0.7 | 0.2 | 1.0 | 0.1 |
| 7117 | 006e03 | AV390031 | CM041f02  |   |   | 12.3  | 24.1  | 23.9  | 1.9 | 0.2 | 1.0 | 0.2 |
| 7118 | 101h08 | AV394114 | CL17a10   |   |   | 8.1   | 8.1   | 9.0   | 1.0 | 0.0 | 1.0 | 0.3 |
| 7119 | 151d05 | AV629460 | LCL059b01 |   |   | 11.6  | 11.2  | 11.3  | 1.1 | 0.3 | 1.0 | 0.1 |
| 7120 | 132d08 | AV644689 | HCL092c09 |   |   | 614.5 | 511.8 | 515.4 | 0.8 | 0.2 | 1.0 | 0.1 |
| 7121 | 134d11 | AV619247 | LC005f08  |   |   | 23.0  | 23.3  | 23.2  | 1.0 | 0.3 | 1.0 | 0.1 |
| 7122 | 107b01 | AV386792 | CM007b02  |   |   | 5.9   | 5.7   | 5.6   | 1.1 | 0.5 | 1.0 | 0.3 |
| 7123 | 013d06 | AV638627 | HC088f12  |   |   | 4.8   | 3.6   | 3.6   | 0.7 | 0.1 | 1.0 | 0.2 |
| 7124 | 113f11 | AV387694 | CM069h02  |   |   | 9.5   | 5.9   | 6.1   | 0.6 | 0.2 | 1.0 | 0.2 |
| 7125 | 111f06 | AV390969 | CM049c09  |   |   | 7.8   | 7.0   | 6.9   | 1.0 | 0.4 | 1.0 | 0.3 |
| 7126 | 141h03 | AV624786 | LC082f11  |   |   | 146.4 | 150.9 | 154.7 | 1.0 | 0.1 | 1.0 | 0.3 |
| 7127 | 029c05 | AV630738 | LCL083e07 |   |   | 6.9   | 3.8   | 3.8   | 0.6 | 0.3 | 1.0 | 0.3 |
| 7128 | 154h10 | AV631199 | LCL090b06 |   |   | 7.5   | 6.9   | 7.3   | 0.9 | 0.2 | 1.0 | 0.4 |
| 7129 | 106b11 | AV397063 | CL75h12   |   |   | 3.3   | 2.9   | 3.1   | 0.9 | 0.2 | 1.0 | 0.3 |
| 7130 | 105e09 | AV396603 | CL65e11   |   |   | 24.3  | 33.6  | 34.0  | 1.7 | 1.0 | 1.0 | 0.2 |
| 7131 | 027f09 | AV629333 | LCL056g07 |   |   | 3.8   | 5.6   | 5.8   | 1.5 | 0.3 | 1.0 | 0.2 |
| 7132 | 132h09 | AV644867 | HCL094h03 |   |   | 10.3  | 10.6  | 11.2  | 1.0 | 0.1 | 1.0 | 0.3 |
| 7133 | 117c06 | AV632447 | HC008d01  |   |   | 67.8  | 67.9  | 69.7  | 1.0 | 0.1 | 1.0 | 0.2 |
| 7134 | 106b09 | AV397062 | CL75g12   |   |   | 11.0  | 10.2  | 12.5  | 0.9 | 0.2 | 1.0 | 0.6 |
| 7135 | 119b12 | AV634758 | HC037e07  |   |   | 12.4  | 24.4  | 24.4  | 2.2 | 1.1 | 1.0 | 0.2 |
| 7136 | 009a10 | AV390421 | CM082h12  |   |   | 27.8  | 24.0  | 23.9  | 0.9 | 0.1 | 1.0 | 0.1 |
| 7137 | 130g10 | AV643703 | HCL074e03 |   |   | 11.2  | 9.7   | 10.0  | 0.9 | 0.1 | 1.0 | 0.3 |
| 7138 | 021d05 | AV622310 | LC047h11  |   |   | 25.7  | 23.6  | 23.8  | 0.9 | 0.2 | 1.0 | 0.4 |
| 7139 | 032f07 | BP093516 | MXL009e05 |   |   | 8.9   | 7.0   | 7.0   | 0.8 | 0.1 | 1.0 | 0.2 |
| 7140 | 141d02 | AV624431 | LC077f09  |   |   | 149.3 | 141.6 | 143.4 | 1.0 | 0.5 | 1.0 | 0.4 |
| 7141 | 155e04 | AV631449 | LCL094b06 |   |   | 20.7  | 25.6  | 26.5  | 1.3 | 0.2 | 1.0 | 0.2 |
| 7142 | 151e08 | AV629558 | LCL060h11 |   |   | 8.6   | 7.1   | 7.2   | 0.8 | 0.1 | 1.0 | 0.1 |
| 7143 | 142h04 | AV625498 | LC093g02  |   |   | 15.3  | 11.9  | 12.0  | 0.8 | 0.2 | 1.0 | 0.2 |
| 7144 | 034f03 | BP096007 | MXL050h09 |   |   | 31.7  | 26.0  | 28.6  | 0.8 | 0.1 | 1.0 | 0.3 |
| 7145 | 027h10 | AV629518 | LCL060b08 |   |   | 7.7   | 7.5   | 7.5   | 1.0 | 0.1 | 1.0 | 0.2 |
| 7146 | 115g09 | AV391548 | CM091f06  |   |   | 9.2   | 6.0   | 6.6   | 0.7 | 0.2 | 1.0 | 0.3 |
| 7147 | 028c11 | AV629853 | LCL067f08 |   |   | 15.4  | 15.9  | 15.9  | 1.1 | 0.1 | 1.0 | 0.2 |
| 7148 | 113d02 | AV393055 | CM066g09  |   |   | 30.7  | 37.1  | 37.3  | 1.2 | 0.2 | 1.0 | 0.3 |
| 7149 | 146e12 | AV627153 | LCL021h09 |   |   | 7.4   | 5.9   | 5.9   | 0.8 | 0.1 | 1.0 | 0.1 |
| 7150 | 005e05 | AV388066 | CM025e07  |   |   | 7.5   | 8.7   | 8.7   | 1.2 | 0.2 | 1.0 | 0.1 |
| 7151 | 151f11 | AV629628 | LCL062c06 |   |   | 10.5  | 9.0   | 9.2   | 0.9 | 0.2 | 1.0 | 0.1 |
| 7152 | 165e05 | BP095231 | MXL038e04 |   |   | 126.1 | 96.5  | 98.5  | 0.8 | 0.2 | 1.0 | 0.2 |
| 7153 | 157d05 | BP096873 | MX019c12  |   |   | 48.5  | 29.6  | 32.9  | 0.6 | 0.2 | 1.0 | 0.6 |
| 7154 | 024c08 | AV626480 | LCL009h03 |   |   | 11.3  | 11.2  | 12.2  | 1.0 | 0.3 | 1.0 | 0.3 |
| 7155 | 017c09 | AV643058 | HCL063a05 |   |   | 5.6   | 5.7   | 6.0   | 1.0 | 0.7 | 1.0 | 0.8 |
| 7156 | 140h12 | AV624157 | LC073g01  |   |   | 21.8  | 11.1  | 10.9  | 0.5 | 0.2 | 1.0 | 0.3 |
| 7157 | 102e12 | AV394430 | CL24g08   |   |   | 9.1   | 7.5   | 7.5   | 0.8 | 0.1 | 1.0 | 0.1 |
| 7158 | 117b08 | AV632344 | HC007a03  |   |   | 51.1  | 47.9  | 54.2  | 1.0 | 0.1 | 1.0 | 0.4 |
| 7159 | 036h02 | BP098773 | MXL098h09 |   |   | 36.4  | 39.9  | 43.0  | 1.1 | 0.1 | 1.0 | 0.3 |
| 7160 | 013g01 | AV639249 | HC096h06  |   |   | 15.8  | 18.5  | 18.4  | 1.2 | 0.1 | 1.0 | 0.3 |
| 7161 | 122a01 | AV637718 | HC076f05  |   |   | 27.5  | 27.9  | 28.2  | 1.0 | 0.1 | 1.0 | 0.2 |
| 7162 | 012f06 | AV637152 | HC069e01  |   |   | 6.3   | 5.9   | 5.9   | 1.0 | 0.2 | 1.0 | 0.2 |
| 7163 | 113d07 | AV393098 | CM067c10  |   |   | 19.2  | 11.8  | 12.0  | 0.6 | 0.2 | 1.0 | 0.2 |
| 7164 | 118f07 | AV634028 | HC028c10  |   |   | 14.2  | 10.0  | 10.1  | 0.7 | 0.2 | 1.0 | 0.1 |
| 7165 | 102e01 | AV394256 | CL22f12   |   |   | 6.0   | 10.8  | 10.9  | 1.8 | 0.2 | 1.0 | 0.0 |
| 7166 | 140h10 | AV624144 | LC073e09  |   |   | 17.7  | 1     |       |     |     |     |     |

|      | A      | B        | C         | D | E                     | F     | G     | H     | I   | J   | K   | L   |
|------|--------|----------|-----------|---|-----------------------|-------|-------|-------|-----|-----|-----|-----|
| 7167 | 125d11 | AV640626 | HCL019d10 |   |                       | 16.4  | 17.8  | 18.9  | 1.1 | 0.2 | 1.0 | 0.3 |
| 7168 | 016d04 | AV642093 | HCL045e04 |   |                       | 14.9  | 19.2  | 19.5  | 1.3 | 0.2 | 1.0 | 0.0 |
| 7169 | 014b10 | AV387521 | CM026c07  |   |                       | 18.9  | 21.2  | 21.5  | 1.1 | 0.1 | 1.0 | 0.1 |
| 7170 | 120c10 | AV635941 | HC053a09  |   |                       | 19.6  | 22.8  | 25.6  | 1.2 | 0.0 | 1.0 | 0.5 |
| 7171 | 124e09 | AV640192 | HCL011h08 |   |                       | 28.9  | 22.7  | 27.1  | 0.8 | 0.0 | 1.0 | 0.4 |
| 7172 | 146d02 | AV627077 | LCL020g02 |   |                       | 9.7   | 14.6  | 14.8  | 1.6 | 0.5 | 1.0 | 0.2 |
| 7173 | 124c06 | BP098689 | MXL097d10 |   |                       | 14.0  | 12.2  | 13.1  | 0.9 | 0.0 | 1.0 | 0.3 |
| 7174 | 170c10 | BP097348 | MXL074c05 |   |                       | 5.6   | 6.0   | 6.1   | 1.1 | 0.1 | 1.0 | 0.1 |
| 7175 | 166e05 | BP095671 | MXL045f01 |   |                       | 29.6  | 34.6  | 35.7  | 1.2 | 0.2 | 1.0 | 0.2 |
| 7176 | 146f05 | AV627168 | LCL022b05 |   |                       | 22.3  | 18.4  | 18.7  | 0.9 | 0.2 | 1.0 | 0.1 |
| 7177 | 150e06 | AV629039 | LCL050g08 |   |                       | 14.0  | 10.8  | 11.1  | 0.8 | 0.0 | 1.0 | 0.1 |
| 7178 | 146d11 | AV627106 | LCL021b12 |   |                       | 7.6   | 7.9   | 8.3   | 1.1 | 0.2 | 1.0 | 0.2 |
| 7179 | 104d03 | AV397761 | CL49a06   |   |                       | 4.6   | 4.8   | 4.9   | 1.0 | 0.1 | 1.0 | 0.2 |
| 7180 | 011c08 | AV634599 | HC035d09  |   |                       | 4.7   | 5.7   | 5.7   | 1.2 | 0.2 | 1.0 | 0.3 |
| 7181 | 128e11 | AV642445 | HCL051h04 |   |                       | 6.4   | 5.6   | 5.6   | 0.9 | 0.2 | 1.0 | 0.2 |
| 7182 | 129d01 | AV642808 | HCL058d12 |   |                       | 28.9  | 19.5  | 21.5  | 0.7 | 0.1 | 1.0 | 0.3 |
| 7183 | 148b12 | AV627881 | LCL033c09 |   |                       | 6.4   | 5.2   | 5.3   | 0.8 | 0.2 | 1.0 | 0.1 |
| 7184 | 151a10 | AV629328 | LCL056f10 |   |                       | 17.8  | 18.1  | 19.7  | 1.0 | 0.1 | 1.0 | 0.3 |
| 7185 | 104b06 | AV397774 | CL45a06   |   |                       | 5.6   | 4.9   | 5.0   | 0.9 | 0.2 | 1.0 | 0.2 |
| 7186 | 018b08 | AV644221 | HCL084c04 |   |                       | 15.6  | 12.2  | 12.9  | 0.8 | 0.2 | 1.0 | 0.3 |
| 7187 | 016a03 | AV641580 | HCL036f10 |   |                       | 16.7  | 26.9  | 28.4  | 1.6 | 0.3 | 1.0 | 0.2 |
| 7188 | 011f03 | AV635191 | HC043b02  |   |                       | 7.6   | 8.3   | 8.5   | 1.2 | 0.3 | 1.0 | 0.2 |
| 7189 | 113a12 | AV392726 | CM063d02  |   |                       | 14.8  | 13.5  | 15.0  | 1.2 | 0.6 | 1.0 | 0.4 |
| 7190 | 120h02 | AV636473 | HC060a03  |   |                       | 147.3 | 121.1 | 138.0 | 0.8 | 0.2 | 1.0 | 0.5 |
| 7191 | 008b04 | AV392936 | CM065g09  |   |                       | 6.1   | 6.2   | 6.1   | 1.0 | 0.1 | 1.0 | 0.2 |
| 7192 | 107c12 | AV397700 | CM009a09  |   |                       | 6.1   | 5.9   | 6.2   | 1.0 | 0.2 | 1.0 | 0.4 |
| 7193 | 115f04 | AV391175 | CM089g05  |   |                       | 3.8   | 3.2   | 3.4   | 1.0 | 0.4 | 1.0 | 0.3 |
| 7194 | 013g09 | AV639559 | HCL001a04 |   |                       | 4.0   | 4.3   | 4.4   | 1.0 | 0.4 | 1.0 | 0.5 |
| 7195 | 001a10 | AV397615 | CL02g08   |   |                       | 7.2   | 6.2   | 6.5   | 0.9 | 0.3 | 1.0 | 0.2 |
| 7196 | 012f04 | AV637114 | HC068h07  |   |                       | 14.2  | 12.6  | 12.9  | 0.9 | 0.1 | 1.0 | 0.2 |
| 7197 | 011a11 | AV634209 | HC030e09  |   |                       | 6.8   | 4.2   | 4.4   | 0.7 | 0.3 | 1.0 | 0.3 |
| 7198 | 150d05 | AV628963 | LCL049f06 |   |                       | 8.1   | 8.2   | 8.3   | 1.0 | 0.2 | 1.0 | 0.2 |
| 7199 | 161h05 | BP093371 | MXL007e05 |   |                       | 19.3  | 20.3  | 20.4  | 1.0 | 0.3 | 1.0 | 0.6 |
| 7200 | 126h07 | AV641544 | HCL035h11 |   |                       | 9.4   | 8.7   | 9.0   | 0.9 | 0.1 | 1.0 | 0.2 |
| 7201 | 150h07 | AV629252 | LCL055c08 |   |                       | 5.8   | 5.3   | 5.6   | 0.9 | 0.1 | 1.0 | 0.4 |
| 7202 | 128g11 | AV642557 | HCL053h03 |   |                       | 19.9  | 18.6  | 20.1  | 0.9 | 0.2 | 1.0 | 0.3 |
| 7203 | 105d04 | AV396429 | CL62e01   |   |                       | 4.3   | 3.7   | 3.7   | 0.9 | 0.2 | 1.0 | 0.1 |
| 7204 | 149f11 | AV628605 | LCL044d11 |   |                       | 7.4   | 14.3  | 14.5  | 2.0 | 0.3 | 1.0 | 0.0 |
| 7205 | 151a08 | AV629302 | LCL056c02 |   |                       | 16.8  | 15.1  | 15.5  | 0.9 | 0.1 | 1.0 | 0.3 |
| 7206 | 015d01 | AV641024 | HCL026d09 |   |                       | 5.9   | 8.8   | 8.7   | 1.5 | 0.2 | 1.0 | 0.3 |
| 7207 | 110c04 | AV389082 | CM034e02  |   |                       | 20.9  | 19.4  | 19.6  | 0.9 | 0.0 | 1.0 | 0.0 |
| 7208 | 157f03 | BP087073 | MX024e07  |   |                       | 6.4   | 7.6   | 7.7   | 1.2 | 0.1 | 1.0 | 0.1 |
| 7209 | 127e04 | AV641835 | HCL041b02 |   |                       | 7.2   | 8.1   | 8.3   | 1.2 | 0.4 | 1.0 | 0.3 |
| 7210 | 148f06 | AV628123 | LCL037a09 |   |                       | 9.9   | 8.7   | 9.1   | 0.9 | 0.2 | 1.0 | 0.1 |
| 7211 | 113g06 | AV389360 | CM070c12  |   |                       | 4.3   | 4.1   | 4.1   | 0.9 | 0.1 | 1.0 | 0.3 |
| 7212 | 034d07 | BP095736 | MXL046f01 |   |                       | 14.6  | 12.6  | 13.6  | 0.9 | 0.1 | 1.0 | 0.4 |
| 7213 | 134c07 | AV619133 | LC004c06  |   |                       | 9.8   | 9.8   | 10.2  | 1.0 | 0.1 | 1.0 | 0.2 |
| 7214 | 133a04 | AV644882 | HCL095a11 |   |                       | 5.5   | 4.8   | 5.0   | 0.9 | 0.3 | 1.0 | 0.4 |
| 7215 | 134a02 | BP383775 | LC001a01  |   |                       | 15.3  | 16.9  | 17.7  | 1.1 | 0.1 | 1.0 | 0.2 |
| 7216 | 119e10 | AV635164 | HC042g02  |   |                       | 4.0   | 3.2   | 3.3   | 0.8 | 0.1 | 1.0 | 0.1 |
| 7217 | 114d03 | AV389520 | CM076a11  |   |                       | 16.2  | 13.9  | 13.6  | 0.8 | 0.3 | 1.0 | 0.2 |
| 7218 | 016c06 | AV641931 | HCL042f03 |   |                       | 4.5   | 5.2   | 5.3   | 1.2 | 0.2 | 1.0 | 0.1 |
| 7219 | 121e01 | AV637171 | HC069g01  |   |                       | 11.8  | 8.3   | 9.0   | 0.7 | 0.1 | 1.0 | 0.4 |
| 7220 | 131g11 | AV644311 | HCL086b01 |   |                       | 23.8  | 23.6  | 23.4  | 1.0 | 0.3 | 1.0 | 0.4 |
| 7221 | 014b04 | AV639757 | HCL004e04 |   | <i>Volvox carteri</i> | 25.7  | 37.0  | 37.5  | 1.4 | 0.2 | 1.0 | 0.1 |
| 7222 | 106e11 | AV386492 | CM001f12  |   |                       | 6.7   | 5.8   | 6.1   | 0.9 | 0.3 | 1.0 | 0.3 |
| 7223 | 145e07 | AV626730 | LCL014e05 |   |                       | 6.2   | 5.9   | 5.9   | 0.9 | 0.1 | 1.0 | 0.1 |
| 7224 | 113f02 | AV397397 | CM068h06  |   |                       | 28.4  | 29.0  | 29.8  | 1.0 | 0.2 | 1.0 | 0.1 |
| 7225 | 117f08 | AV632976 | HC015b01  |   |                       | 4.3   | 4.4   | 4.6   | 1.1 | 0.4 | 1.0 | 0.2 |
| 7226 | 127f09 | AV641940 | HCL042g09 |   |                       | 8.2   | 12.3  | 12.6  | 1.5 | 0.2 | 1.0 | 0.2 |
| 7227 | 031e03 | BP086923 | MX020d07  |   |                       | 4.4   | 4.5   | 4.6   | 1.0 | 0.1 | 1.0 | 0.2 |
| 7228 | 152c01 | AV629840 | LCL067c10 |   |                       | 20.9  | 14.7  | 14.9  | 0.7 | 0.1 | 1.0 | 0.2 |
| 7229 | 143a12 | AV625566 | LC094g01  |   |                       | 19.7  | 18.5  | 18.9  | 0.9 | 0.1 | 1.0 | 0.1 |
| 7230 | 150f07 | AV629102 | LCL052a11 |   |                       | 7.0   | 10.9  | 10.5  | 1.5 | 0.3 | 1.0 | 0.3 |
| 7231 | 142c02 | AV625012 | LC085g05  |   |                       | 10.1  | 10.3  | 10.9  | 1.1 | 0.4 | 1.0 | 0.2 |
| 7232 | 015g05 | AV641395 | HCL032h03 |   |                       | 10.3  | 10.2  | 11.4  | 1.0 | 0.2 | 1.0 | 0.4 |
| 7233 | 017c04 | AV643020 | HCL062d02 |   |                       | 3.7   | 4.4   | 4.6   | 1.2 | 0.1 | 1.0 | 0.3 |
| 7234 | 134e10 | AV619375 | LC007e04  |   |                       | 22.0  | 19.8  | 20.1  | 0.9 | 0.2 | 1.0 | 0.1 |
| 7235 | 139g02 | AV623327 | LC062b07  |   |                       | 7.3   | 5.9   | 6.4   | 0.8 | 0.1 | 1.0 | 0.4 |
| 7236 | 150f01 | AV629061 | LCL051b02 |   |                       | 7.1   | 5.4   | 5.7   | 0.8 | 0.1 | 1.0 | 0.2 |
| 7237 | 136c02 | AV620590 | LC024a10  |   |                       | 144.3 | 136.8 | 147.5 | 0.9 | 0.1 | 1.0 | 0.3 |
| 7238 | 147g02 | AV627664 | LCL030c04 |   |                       | 14.3  | 13.0  | 13.3  | 0.9 | 0.1 | 1.0 | 0.1 |
| 7239 | 129a02 | AV642622 | HCL054h03 |   |                       | 9.9   | 9.0   | 9.2   | 0.9 | 0.1 | 1.0 | 0.2 |
| 7240 | 131c12 | AV644045 | HCL080g09 |   |                       | 28.1  | 28.2  | 28.8  | 1.0 | 0.2 | 1.0 | 0.4 |
| 7241 | 106a06 | AV396464 | CL74b01   |   |                       | 6.7   | 6.7   | 7.0   | 1.0 | 0.2 | 1.0 | 0.3 |
| 7242 | 035h07 | BP097484 | MXL076e02 |   |                       | 6.8   | 6.8   | 7.1   | 1.0 | 0.3 | 1.0 | 0.2 |
| 7243 | 119e03 | AV635071 | HC041e06  |   |                       | 5.0   | 5.0   | 5.8   | 1.0 | 0.3 | 1.0 | 0.5 |
| 7244 | 033e01 | BP094411 | MXL022f12 |   |                       | 72.0  | 43.0  | 41.7  | 0.6 | 0.1 | 1.0 | 0.3 |
| 7245 | 111a04 | AV390084 | CM042b06  |   |                       | 64.8  | 102.5 | 103.8 | 1.8 | 0.6 | 1.0 | 0.2 |
| 7246 | 138e02 | AV622287 | LC047f05  |   |                       | 50.0  | 27.0  | 29.2  | 0.6 | 0.2 | 1.0 | 0.4 |
| 7247 | 154g02 | AV631102 | LCL088g12 |   |                       | 24.9  | 21.5  | 23.2  | 0.9 | 0.2 | 1.0 | 0.2 |
| 7248 | 148c04 | AV627924 | LCL033h11 |   |                       | 9.4   | 8.4   | 8.5   | 1.0 | 0.2 | 1.0 | 0.1 |
| 7249 | 134c04 | AV619105 | LC003h01  |   |                       | 9.5   | 7.7   | 7.9   | 0.8 | 0.2 | 1.0 | 0.3 |
| 7250 | 118f12 | AV634093 | HC029b09  |   |                       | 3.0   | 3.7   | 3.8   | 1.2 | 0.2 | 1.0 | 0.2 |
| 7251 | 162d08 | BP093702 | MXL012c06 |   |                       | 18.3  | 16.2  | 16.6  | 0.9 | 0.0 | 1.0 | 0.0 |
| 7252 | 023e08 | AV625189 | LC089a10  |   |                       | 22.2  | 11.3  | 11.5  | 0.5 | 0.0 | 1.0 | 0.1 |
| 7253 | 013a02 | AV637744 | HC076h11  |   |                       | 15.4  | 11.2  | 11.6  | 0.8 | 0.5 | 1.0 | 0.5 |
| 7254 | 034e08 | BP095930 | MXL049f01 |   |                       | 23.3  | 22.1  | 23.0  | 0.9 | 0.1 | 1.0 | 0.2 |
| 7255 | 105e07 | AV396553 | CL65b01   |   |                       | 5.3   | 4.9   | 5.0   | 0.9 | 0.2 | 1.0 | 0.2 |
| 7256 | 107e03 | AV387021 | CM010c01  |   |                       | 22.0  | 13.9  | 14.0  | 0.7 | 0.4 | 1.0 | 0.3 |
| 7257 | 007e01 | AV391740 | CM055h10  |   |                       | 63.5  | 60.2  | 61.1  | 1.0 | 0.2 | 1.0 | 0.2 |
| 7258 | 008e09 | AV388419 | CM071f07  |   |                       | 7.9   | 7.6   | 7.8   | 1.0 | 0.2 | 1.0 | 0.1 |
| 7259 | 102g07 | AV394732 | CL27f07   |   |                       | 15.1  | 11.7  | 12.1  | 0.8 | 0.1 | 1.0 | 0.4 |
| 7260 | 029b04 | AV630618 | LCL081f06 |   |                       | 10.1  | 20.1  | 21.7  | 2.0 | 0.3 | 1.0 | 0.3 |
| 7261 | 013b06 | AV638076 | HC081f01  |   |                       | 38.2  | 35.0  | 37.5  | 0.9 | 0.1 | 1.0 | 0.4 |
| 7262 | 031d07 | BP086859 | MX018g09  |   |                       | 24.0  | 23.3  | 23.6  | 1.0 | 0.1 | 1.0 | 0.1 |
| 7263 | 156d09 | BP086105 | MX002a03  |   |                       | 6.1   | 6.4   | 6.6   | 1.1 | 0.2 | 1.0 | 0.2 |
| 7264 | 030f03 | AV631823 | LCL100d05 |   |                       | 17.2  | 15.9  | 16.4  | 0.9 | 0.1 | 1.0 | 0.2 |
| 7265 | 149g02 | AV628619 | LCL044f03 |   |                       | 23.4  | 21.0  | 21.9  | 0.9 | 0.1 | 1.0 | 0.1 |
| 7266 | 001g10 | AV394264 | CL22h11   |   |                       | 2.3   | 2.3   | 2.5   | 1.1 | 0.3 | 1.0 | 0.4 |
| 7267 | 130d08 | AV643449 | HCL069h03 |   |                       | 15.7  | 14.6  | 14.9  | 0.9 | 0.1 | 1.0 | 0.1 |
| 7268 | 102e08 | AV394465 | CL23g04   |   |                       | 13.0  | 10.3  | 11.6  | 0.8 | 0.1 | 1.0 | 0.5 |
| 7269 | 148e11 | AV628078 | LCL036d04 |   |                       | 54.7  | 52.2  | 53.0  | 1.0 | 0.1 | 1.0 | 0.1 |
| 7270 | 124f01 | AV640201 | HCL012a11 |   |                       | 7.5   | 7.7   | 8.0   | 1.0 | 0.1 | 1.0 | 0.2 |
| 7271 | 148d12 | AV628030 | LCL035f11 |   |                       | 3.4   | 3.2   | 3.3   | 0.9 | 0.2 | 1.0 | 0.3 |
| 7272 | 144g10 | BP383834 | LCL008e09 |   |                       | 14.7  | 13.2  | 13.2  | 0.9 | 0.1 | 1.0 | 0.2 |
| 7273 | 103c01 | AV394975 | CL33b08   |   |                       |       |       |       |     |     |     |     |



|      | A      | B        | C         | D | E | F     | G     | H     | I   | J   | K   | L   |
|------|--------|----------|-----------|---|---|-------|-------|-------|-----|-----|-----|-----|
| 7274 | 151b09 | AV629369 | LCL057e06 |   |   | 12.5  | 11.8  | 12.1  | 0.9 | 0.1 | 1.0 | 0.1 |
| 7275 | 152e03 | AV629995 | LCL070f11 |   |   | 33.0  | 26.0  | 27.0  | 0.8 | 0.2 | 1.0 | 0.3 |
| 7276 | 161f04 | BP093233 | MXL005d07 |   |   | 6.4   | 6.2   | 6.4   | 1.0 | 0.3 | 1.0 | 0.3 |
| 7277 | 118e11 | AV633917 | HC026h06  |   |   | 6.7   | 5.2   | 5.5   | 0.8 | 0.1 | 1.0 | 0.3 |
| 7278 | 103g05 | AV395420 | CL41g04   |   |   | 2.9   | 3.3   | 3.5   | 1.1 | 0.3 | 1.0 | 0.3 |
| 7279 | 150e01 | AV629020 | LCL050e01 |   |   | 9.9   | 7.0   | 7.3   | 0.7 | 0.1 | 1.0 | 0.1 |
| 7280 | 165e04 | BP095212 | MXL038b07 |   |   | 7.6   | 10.3  | 10.5  | 1.5 | 0.5 | 1.0 | 0.2 |
| 7281 | 008a08 | AV392775 | CM063h02  |   |   | 10.6  | 10.5  | 10.7  | 1.0 | 0.2 | 1.0 | 0.1 |
| 7282 | 137c04 | AV621383 | LC035c06  |   |   | 16.7  | 10.5  | 11.9  | 0.7 | 0.3 | 1.0 | 0.4 |
| 7283 | 151h01 | AV629703 | LCL064b02 |   |   | 8.6   | 8.5   | 9.0   | 1.0 | 0.4 | 1.0 | 0.3 |
| 7284 | 034f07 | BP096112 | MXL052h08 |   |   | 8.0   | 6.5   | 7.0   | 0.8 | 0.1 | 1.0 | 0.3 |
| 7285 | 168f08 | BP096648 | MXL062c12 |   |   | 8.0   | 7.1   | 7.8   | 1.0 | 0.6 | 1.0 | 0.5 |
| 7286 | 110d10 | AV389326 | CM036a11  |   |   | 3.4   | 3.5   | 3.8   | 1.1 | 0.1 | 1.0 | 0.3 |
| 7287 | 106h05 | AV386624 | CM004b01  |   |   | 105.8 | 94.3  | 98.5  | 0.9 | 0.1 | 1.0 | 0.1 |
| 7288 | 018b01 | AV644140 | HCL082g01 |   |   | 2.7   | 4.4   | 4.5   | 1.6 | 0.1 | 1.0 | 0.3 |
| 7289 | 146g12 | AV627253 | LCL023g10 |   |   | 21.1  | 19.3  | 19.7  | 0.9 | 0.1 | 1.0 | 0.1 |
| 7290 | 030a05 | AV631279 | LCL091d03 |   |   | 24.1  | 21.7  | 23.7  | 0.9 | 0.2 | 1.0 | 0.3 |
| 7291 | 123f08 | AV639712 | HCL003e08 |   |   | 28.4  | 23.2  | 26.9  | 0.8 | 0.4 | 1.0 | 0.7 |
| 7292 | 146h02 | AV627270 | LCL024b05 |   |   | 13.7  | 16.6  | 17.2  | 1.2 | 0.2 | 1.0 | 0.1 |
| 7293 | 168h04 | BP096721 | MXL063g02 |   |   | 11.1  | 14.9  | 18.4  | 1.2 | 1.1 | 1.0 | 1.0 |
| 7294 | 119d06 | AV635011 | HC040g08  |   |   | 12.2  | 12.0  | 12.7  | 1.1 | 0.3 | 1.0 | 0.1 |
| 7295 | 122b12 | AV637952 | HC079h01  |   |   | 34.0  | 31.7  | 33.2  | 0.9 | 0.1 | 1.0 | 0.2 |
| 7296 | 166d12 | BP095650 | MXL045c02 |   |   | 29.3  | 34.2  | 34.9  | 1.2 | 0.1 | 1.0 | 0.1 |
| 7297 | 024e03 | AV626616 | LCL012d02 |   |   | 13.7  | 9.9   | 12.6  | 0.7 | 0.1 | 1.0 | 0.5 |
| 7298 | 115g05 | AV391444 | CM090h11  |   |   | 11.7  | 9.0   | 9.5   | 0.8 | 0.3 | 1.0 | 0.2 |
| 7299 | 125e04 | AV640668 | HCL020c07 |   |   | 13.2  | 12.6  | 12.7  | 1.0 | 0.3 | 1.0 | 0.1 |
| 7300 | 023d07 | AV625088 | LC087g01  |   |   | 13.3  | 9.9   | 10.3  | 0.7 | 0.1 | 1.0 | 0.2 |
| 7301 | 015d02 | AV641070 | HCL027c02 |   |   | 12.3  | 11.4  | 11.6  | 1.0 | 0.3 | 1.0 | 0.1 |
| 7302 | 118a07 | AV633362 | HC019h10  |   |   | 9.5   | 9.8   | 11.9  | 1.1 | 0.3 | 1.0 | 0.4 |
| 7303 | 144h04 | AV626422 | LCL008g10 |   |   | 32.7  | 28.7  | 29.8  | 0.9 | 0.1 | 1.0 | 0.1 |
| 7304 | 111g02 | AV391073 | CM050e10  |   |   | 9.2   | 8.2   | 8.4   | 0.9 | 0.1 | 1.0 | 0.1 |
| 7305 | 032d03 | BP093178 | MXL004f05 |   |   | 6.7   | 5.9   | 6.2   | 1.0 | 0.3 | 1.0 | 0.2 |
| 7306 | 143f03 | AV625825 | LC098d05  |   |   | 30.5  | 27.2  | 27.8  | 0.9 | 0.2 | 1.0 | 0.1 |
| 7307 | 167f03 | BP096126 | MXL053b07 |   |   | 25.4  | 22.3  | 26.2  | 1.0 | 0.5 | 1.0 | 0.6 |
| 7308 | 115c06 | AV390169 | CM085h11  |   |   | 83.2  | 73.6  | 73.9  | 0.9 | 0.1 | 1.0 | 0.4 |
| 7309 | 004e04 | AV397673 | CM009h04  |   |   | 7.7   | 7.7   | 8.8   | 1.0 | 0.2 | 1.0 | 0.5 |
| 7310 | 164c05 | BP094680 | MXL027b11 |   |   | 25.1  | 57.7  | 62.2  | 2.3 | 0.4 | 1.0 | 0.3 |
| 7311 | 159h12 | BP088231 | MX054h01  |   |   | 8.3   | 8.6   | 9.8   | 1.0 | 0.3 | 1.0 | 0.7 |
| 7312 | 003f05 | AV396805 | CL69g02   |   |   | 8.1   | 9.7   | 10.1  | 1.2 | 0.1 | 1.0 | 0.3 |
| 7313 | 029h07 | AV631206 | LCL090c02 |   |   | 8.8   | 8.1   | 8.4   | 0.9 | 0.2 | 1.0 | 0.2 |
| 7314 | 142d05 | AV625151 | LC088e07  |   |   | 11.1  | 11.3  | 12.3  | 1.2 | 0.7 | 1.0 | 0.4 |
| 7315 | 147c03 | AV627434 | LCL026f09 |   |   | 19.9  | 17.2  | 17.8  | 0.9 | 0.3 | 1.0 | 0.1 |
| 7316 | 161f02 | BP093224 | MXL005c05 |   |   | 14.9  | 10.5  | 11.0  | 0.7 | 0.1 | 1.0 | 0.2 |
| 7317 | 148f10 | AV628138 | LCL037c11 |   |   | 28.1  | 23.3  | 24.6  | 0.8 | 0.1 | 1.0 | 0.2 |
| 7318 | 101h10 | AV394102 | CL17d01   |   |   | 5.7   | 5.8   | 6.6   | 1.0 | 0.2 | 1.0 | 0.4 |
| 7319 | 143d03 | AV625685 | LC096d11  |   |   | 8.1   | 11.4  | 11.6  | 1.5 | 0.7 | 1.0 | 0.2 |
| 7320 | 101h12 | AV394135 | CL17d07   |   |   | 7.2   | 5.3   | 6.1   | 0.7 | 0.2 | 1.0 | 0.5 |
| 7321 | 033h06 | BP095062 | MXL035b10 |   |   | 12.5  | 13.1  | 16.1  | 1.1 | 0.1 | 1.0 | 0.5 |
| 7322 | 022g10 | AV624291 | LC075f10  |   |   | 26.4  | 32.2  | 33.1  | 1.2 | 0.2 | 1.0 | 0.1 |
| 7323 | 007e11 | AV391924 | CM057e10  |   |   | 17.4  | 19.4  | 19.8  | 1.1 | 0.0 | 1.0 | 0.0 |
| 7324 | 028h02 | AV630330 | LCL077d03 |   |   | 2.2   | 1.6   | 1.6   | 0.8 | 0.3 | 1.0 | 0.1 |
| 7325 | 172e09 | BP098427 | MXL093b06 |   |   | 8.7   | 9.6   | 10.1  | 1.1 | 0.1 | 1.0 | 0.2 |
| 7326 | 031e12 | BP087110 | MX025f02  |   |   | 11.4  | 16.1  | 16.9  | 1.5 | 0.6 | 1.0 | 0.1 |
| 7327 | 101b02 | AV393319 | CL01h03   |   |   | 4.7   | 6.1   | 6.4   | 1.6 | 0.8 | 1.0 | 0.2 |
| 7328 | 110d11 | AV389348 | CM036a12  |   |   | 13.3  | 13.0  | 13.2  | 1.0 | 0.2 | 1.0 | 0.2 |
| 7329 | 101g02 | AV393900 | CL13f03   |   |   | 12.4  | 9.8   | 10.1  | 1.0 | 0.7 | 1.0 | 0.1 |
| 7330 | 014f07 | AV640282 | HCL013f07 |   |   | 3.3   | 2.5   | 2.7   | 0.8 | 0.2 | 1.0 | 0.4 |
| 7331 | 010d02 | AV632658 | HC011a03  |   |   | 3.3   | 4.3   | 4.4   | 1.6 | 0.9 | 1.0 | 0.1 |
| 7332 | 161d06 | BP093114 | MXL003e10 |   |   | 19.0  | 25.9  | 27.0  | 1.4 | 0.2 | 1.0 | 0.2 |
| 7333 | 148g06 | AV628175 | LCL037g12 |   |   | 7.1   | 6.7   | 7.0   | 1.0 | 0.1 | 1.0 | 0.2 |
| 7334 | 113f05 | AV397574 | CM069b08  |   |   | 13.1  | 17.2  | 18.1  | 1.3 | 0.2 | 1.0 | 0.2 |
| 7335 | 121c02 | AV636946 | HC066e06  |   |   | 24.2  | 28.0  | 35.5  | 1.2 | 0.2 | 1.0 | 0.5 |
| 7336 | 142g07 | BP098793 | MXL099c04 |   |   | 12.8  | 12.4  | 12.7  | 1.0 | 0.2 | 1.0 | 0.0 |
| 7337 | 124g05 | AV640253 | HCL013b08 |   |   | 7.2   | 6.2   | 6.5   | 0.9 | 0.2 | 1.0 | 0.1 |
| 7338 | 138a06 | AV627220 | LCL022h07 |   |   | 54.2  | 39.4  | 40.7  | 1.1 | 0.8 | 1.0 | 0.1 |
| 7339 | 138e01 | AV622279 | LC047e05  |   |   | 11.9  | 8.0   | 8.3   | 0.7 | 0.1 | 1.0 | 0.1 |
| 7340 | 112g02 | AV392265 | CM060b01  |   |   | 11.7  | 11.2  | 11.6  | 1.0 | 0.1 | 1.0 | 0.2 |
| 7341 | 150d04 | AV628961 | LCL049f03 |   |   | 9.6   | 8.2   | 8.5   | 0.9 | 0.1 | 1.0 | 0.1 |
| 7342 | 104f04 | AV395864 | CL52a01   |   |   | 40.7  | 28.7  | 30.3  | 0.7 | 0.2 | 1.0 | 0.3 |
| 7343 | 147b01 | AV627385 | LCL026a03 |   |   | 19.3  | 14.7  | 15.2  | 0.8 | 0.1 | 1.0 | 0.2 |
| 7344 | 171e12 | BP097991 | MXL084g11 |   |   | 7.5   | 9.3   | 9.6   | 1.2 | 0.2 | 1.0 | 0.3 |
| 7345 | 109e07 | AV387641 | CM027e03  |   |   | 101.8 | 84.5  | 88.4  | 0.8 | 0.1 | 1.0 | 0.1 |
| 7346 | 124d03 | AV640116 | HCL010f10 |   |   | 22.6  | 19.8  | 20.3  | 0.9 | 0.2 | 1.0 | 0.2 |
| 7347 | 143h01 | AV626006 | LCL001a01 |   |   | 8.0   | 5.8   | 6.1   | 0.8 | 0.2 | 1.0 | 0.1 |
| 7348 | 027b05 | AV628906 | LCL048g07 |   |   | 22.1  | 17.9  | 18.3  | 0.8 | 0.2 | 1.0 | 0.1 |
| 7349 | 110e04 | AV389375 | CM036c06  |   |   | 76.1  | 77.4  | 76.1  | 1.0 | 0.2 | 1.0 | 0.2 |
| 7350 | 120e01 | AV636046 | HC054e04  |   |   | 10.3  | 9.4   | 10.0  | 0.9 | 0.1 | 1.0 | 0.2 |
| 7351 | 140a10 | AV623578 | LC065h02  |   |   | 9.6   | 7.1   | 7.5   | 0.7 | 0.0 | 1.0 | 0.2 |
| 7352 | 119g01 | AV635311 | HC044g03  |   |   | 12.4  | 10.5  | 12.5  | 0.8 | 0.2 | 1.0 | 0.6 |
| 7353 | 141c09 | AV624402 | LC077c08  |   |   | 21.4  | 15.3  | 15.9  | 0.7 | 0.1 | 1.0 | 0.1 |
| 7354 | 141c11 | AV624422 | LC077e08  |   |   | 5.6   | 6.0   | 6.2   | 1.1 | 0.1 | 1.0 | 0.1 |
| 7355 | 031h12 | BP087554 | MX037c07  |   |   | 37.2  | 43.6  | 44.5  | 1.2 | 0.2 | 1.0 | 0.1 |
| 7356 | 153c05 | AV630406 | LCL078d08 |   |   | 8.2   | 7.6   | 7.8   | 0.9 | 0.1 | 1.0 | 0.1 |
| 7357 | 011d10 | AV634875 | HC039b05  |   |   | 68.8  | 78.5  | 79.8  | 1.1 | 0.3 | 1.0 | 0.1 |
| 7358 | 117h07 | BP383689 | HC018d04  |   |   | 5.1   | 4.4   | 4.6   | 0.9 | 0.1 | 1.0 | 0.1 |
| 7359 | 021g06 | AV622877 | LC055h09  |   |   | 6.7   | 7.5   | 8.1   | 1.1 | 0.2 | 1.0 | 0.2 |
| 7360 | 104h10 | AV396057 | CL55g06   |   |   | 82.6  | 89.7  | 93.9  | 1.1 | 0.4 | 1.0 | 0.2 |
| 7361 | 020c05 | AV620884 | LC028b03  |   |   | 247.1 | 222.9 | 245.2 | 0.9 | 0.0 | 1.0 | 0.4 |
| 7362 | 118d09 | AV633762 | HC024h10  |   |   | 10.2  | 9.7   | 9.9   | 1.0 | 0.3 | 1.0 | 0.2 |
| 7363 | 032e07 | BP093389 | MXL007g04 |   |   | 12.1  | 10.2  | 12.9  | 0.8 | 0.1 | 1.0 | 0.6 |
| 7364 | 012e11 | AV637065 | HC068c01  |   |   | 5.4   | 5.0   | 5.3   | 0.9 | 0.2 | 1.0 | 0.5 |
| 7365 | 115c01 | AV390586 | CM085e03  |   |   | 29.6  | 55.0  | 73.4  | 1.9 | 0.1 | 1.0 | 0.5 |
| 7366 | 016a09 | AV641644 | HCL038a01 |   |   | 5.4   | 7.4   | 7.7   | 1.4 | 0.4 | 1.0 | 0.4 |
| 7367 | 131a01 | AV643772 | HCL075g05 |   |   | 20.2  | 15.6  | 16.3  | 0.8 | 0.1 | 1.0 | 0.1 |
| 7368 | 148d08 | AV628004 | LCL035b11 |   |   | 9.8   | 8.4   | 8.7   | 0.9 | 0.1 | 1.0 | 0.1 |
| 7369 | 163e04 | BP094311 | MXL021a06 |   |   | 4.4   | 5.2   | 5.9   | 1.3 | 0.2 | 1.0 | 0.6 |
| 7370 | 021c06 | AV622137 | LC045f03  |   |   | 469.2 | 403.1 | 416.6 | 0.9 | 0.3 | 1.0 | 0.1 |
| 7371 | 108g01 | AV387944 | CM021d06  |   |   | 3.0   | 4.1   | 4.2   | 1.3 | 0.3 | 1.0 | 0.1 |
| 7372 | 015h03 | AV641462 | HCL034a10 |   |   | 9.6   | 9.5   | 10.0  | 1.0 | 0.2 | 1.0 | 0.2 |
| 7373 | 143g09 | AV625953 | LC100c04  |   |   | 18.2  | 15.2  | 15.6  | 0.8 | 0.0 | 1.0 | 0.1 |
| 7374 | 154a10 | AV630782 | LCL084c04 |   |   | 21.6  | 19.4  | 20.1  | 0.9 | 0.2 | 1.0 | 0.3 |
| 7375 | 122e10 | AV638518 | HC087d04  |   |   | 8.8   | 7.2   | 8.1   | 0.8 | 0.1 | 1.0 | 0.3 |
| 7376 | 139g07 | AV623380 | LC062h09  |   |   | 6.3   | 5.1   | 5.5   | 0.8 | 0.0 | 1.0 | 0.2 |
| 7377 | 168g11 | BP096707 | MXL063d10 |   |   | 21.6  | 24.0  | 24.9  | 1.1 | 0.3 | 1.0 | 0.1 |
| 7378 | 108d01 | AV387237 | CM018b05  |   |   | 6.5   | 10.5  | 11.2  | 1.6 | 0.2 | 1.0 | 0.2 |
| 7379 | 147f09 | AV627647 | LCL030a04 |   |   | 17.7  | 12.4  | 12.9  | 0.7 | 0.1 | 1.0 | 0.2 |
| 7380 | 130a07 | AV643225 | HCL       |   |   |       |       |       |     |     |     |     |

|      | A      | B        | C         | D | E | F     | G     | H     | I   | J   | K   | L   |
|------|--------|----------|-----------|---|---|-------|-------|-------|-----|-----|-----|-----|
| 7381 | 167f09 | BP096144 | MXL053e05 |   |   | 8.3   | 7.0   | 7.9   | 0.8 | 0.4 | 1.0 | 0.8 |
| 7382 | 036d07 | BP098237 | MXL089h06 |   |   | 27.0  | 22.1  | 24.5  | 0.8 | 0.2 | 1.0 | 0.4 |
| 7383 | 011h09 | AV635722 | HC050a10  |   |   | 41.7  | 44.3  | 45.7  | 1.1 | 0.1 | 1.0 | 0.1 |
| 7384 | 106d09 | AV397337 | CL80d02   |   |   | 40.7  | 34.2  | 36.3  | 0.9 | 0.3 | 1.0 | 0.3 |
| 7385 | 150f02 | AV629076 | LCL051e11 |   |   | 12.8  | 11.2  | 11.6  | 0.9 | 0.1 | 1.0 | 0.1 |
| 7386 | 023d08 | AV625094 | LC087g09  |   |   | 11.8  | 10.5  | 10.8  | 0.9 | 0.2 | 1.0 | 0.1 |
| 7387 | 024f06 | AV626693 | LCL013g10 |   |   | 10.8  | 10.2  | 10.5  | 1.0 | 0.1 | 1.0 | 0.1 |
| 7388 | 119f05 | AV635267 | HC044b07  |   |   | 7.9   | 7.2   | 7.5   | 0.9 | 0.1 | 1.0 | 0.2 |
| 7389 | 166b08 | BP095488 | MXL042f05 |   |   | 13.1  | 12.5  | 13.1  | 1.0 | 0.2 | 1.0 | 0.1 |
| 7390 | 119d03 | AV634941 | HC039h09  |   |   | 5.6   | 4.3   | 4.7   | 0.8 | 0.3 | 1.0 | 0.4 |
| 7391 | 156g03 | BP086312 | MX006d02  |   |   | 4.9   | 4.2   | 5.4   | 0.8 | 0.3 | 1.0 | 0.7 |
| 7392 | 103f02 | AV395185 | CL39d04   |   |   | 6.1   | 7.2   | 7.6   | 1.2 | 0.3 | 1.0 | 0.2 |
| 7393 | 123e03 | AV639614 | HCL001h08 |   |   | 6.5   | 5.0   | 5.3   | 0.8 | 0.2 | 1.0 | 0.1 |
| 7394 | 018b02 | AV644141 | HCL082g03 |   |   | 6.3   | 6.4   | 6.8   | 1.1 | 0.3 | 1.0 | 0.3 |
| 7395 | 141g10 | AV624751 | LC082b05  |   |   | 29.4  | 35.1  | 36.0  | 1.2 | 0.2 | 1.0 | 0.1 |
| 7396 | 025e04 | AV627437 | LCL026g02 |   |   | 12.5  | 11.0  | 11.9  | 0.9 | 0.2 | 1.0 | 0.4 |
| 7397 | 133f05 | AV645136 | HCL098f10 |   |   | 3.9   | 4.1   | 4.3   | 1.1 | 0.2 | 1.0 | 0.2 |
| 7398 | 144f02 | AV626305 | LCL006e01 |   |   | 12.6  | 11.6  | 12.2  | 1.0 | 0.2 | 1.0 | 0.1 |
| 7399 | 033d05 | BP094354 | MXL021g11 |   |   | 6.4   | 7.2   | 7.5   | 1.2 | 0.3 | 1.0 | 0.1 |
| 7400 | 111d06 | AV390610 | CM047b04  |   |   | 3.2   | 3.0   | 3.3   | 1.0 | 0.2 | 1.0 | 0.2 |
| 7401 | 118e12 | AV633934 | HC027b06  |   |   | 166.4 | 117.7 | 121.6 | 0.7 | 0.1 | 1.0 | 0.0 |
| 7402 | 020g05 | AV621418 | LC035g11  |   |   | 13.0  | 11.6  | 12.1  | 0.9 | 0.0 | 1.0 | 0.1 |
| 7403 | 143g06 | AV625940 | LC100a12  |   |   | 11.1  | 12.0  | 13.2  | 1.1 | 0.1 | 1.0 | 0.3 |
| 7404 | 154c10 | AV630900 | LCL086a06 |   |   | 7.2   | 7.2   | 7.4   | 1.1 | 0.2 | 1.0 | 0.3 |
| 7405 | 123h08 | AV639870 | HCL006d12 |   |   | 10.4  | 10.9  | 11.4  | 1.0 | 0.2 | 1.0 | 0.2 |
| 7406 | 138h03 | AV622627 | LC052b03  |   |   | 18.9  | 15.2  | 15.7  | 0.8 | 0.2 | 1.0 | 0.1 |
| 7407 | 018d04 | AV644485 | HCL089d01 |   |   | 7.7   | 12.4  | 14.1  | 2.0 | 1.1 | 1.0 | 0.4 |
| 7408 | 125f01 | AV640713 | HCL021b10 |   |   | 25.8  | 24.6  | 25.7  | 1.0 | 0.1 | 1.0 | 0.1 |
| 7409 | 147g09 | AV627687 | LCL030e10 |   |   | 13.9  | 12.4  | 12.9  | 0.9 | 0.1 | 1.0 | 0.2 |
| 7410 | 018d02 | AV644444 | HCL088f10 |   |   | 8.3   | 7.7   | 8.7   | 1.0 | 0.2 | 1.0 | 0.4 |
| 7411 | 115h05 | AV391699 | CM092h07  |   |   | 6.4   | 6.7   | 7.2   | 1.0 | 0.2 | 1.0 | 0.3 |
| 7412 | 102g01 | AV394606 | CL26h01   |   |   | 5.8   | 9.1   | 9.5   | 1.6 | 0.3 | 1.0 | 0.2 |
| 7413 | 144e04 | AV626269 | LCL005e11 |   |   | 11.1  | 9.8   | 10.1  | 0.9 | 0.1 | 1.0 | 0.2 |
| 7414 | 117e07 | AV632808 | HC012h04  |   |   | 16.2  | 13.6  | 14.2  | 0.9 | 0.2 | 1.0 | 0.3 |
| 7415 | 108f12 | AV387959 | CM021c12  |   |   | 6.3   | 4.4   | 4.7   | 0.7 | 0.1 | 1.0 | 0.2 |
| 7416 | 110h06 | AV389917 | CM040f05  |   |   | 11.9  | 12.0  | 12.5  | 1.1 | 0.3 | 1.0 | 0.1 |
| 7417 | 143g02 | AV625927 | LC099h09  |   |   | 21.3  | 18.9  | 20.3  | 0.9 | 0.1 | 1.0 | 0.1 |
| 7418 | 030a06 | AV631291 | LCL091e09 |   |   | 38.1  | 26.5  | 32.2  | 0.7 | 0.0 | 1.0 | 0.4 |
| 7419 | 105g02 | AV396937 | CL68b02   |   |   | 7.6   | 5.9   | 6.2   | 0.8 | 0.2 | 1.0 | 0.2 |
| 7420 | 154h06 | AV631184 | LCL090a10 |   |   | 8.9   | 7.5   | 7.8   | 0.9 | 0.2 | 1.0 | 0.1 |
| 7421 | 033e08 | BP094490 | MXL023h10 |   |   | 8.9   | 7.5   | 8.2   | 0.8 | 0.1 | 1.0 | 0.3 |
| 7422 | 010e02 | AV632838 | HC013c02  |   |   | 18.3  | 21.6  | 22.3  | 1.2 | 0.2 | 1.0 | 0.0 |
| 7423 | 146b04 | AV626999 | LCL019e12 |   |   | 15.6  | 12.8  | 14.5  | 0.9 | 0.2 | 1.0 | 0.4 |
| 7424 | 108g04 | AV387935 | CM021e04  |   |   | 11.9  | 7.8   | 8.1   | 0.7 | 0.0 | 1.0 | 0.0 |
| 7425 | 031g10 | BP087372 | MX033b08  |   |   | 9.9   | 19.0  | 20.1  | 1.9 | 0.2 | 1.0 | 0.2 |
| 7426 | 117h08 | AV633241 | HC018d10  |   |   | 9.3   | 9.3   | 10.3  | 1.0 | 0.2 | 1.0 | 0.3 |
| 7427 | 008h06 | AV389634 | CM079c12  |   |   | 20.8  | 16.7  | 18.0  | 0.8 | 0.2 | 1.0 | 0.4 |
| 7428 | 003g02 | AV396967 | CL73b01   |   |   | 12.4  | 14.2  | 17.1  | 1.2 | 0.2 | 1.0 | 0.4 |
| 7429 | 101d11 | AV393543 | CL08a11   |   |   | 8.4   | 10.1  | 14.2  | 1.2 | 0.3 | 1.0 | 0.6 |
| 7430 | 149g05 | AV628629 | LCL044g05 |   |   | 9.3   | 7.4   | 7.6   | 0.8 | 0.1 | 1.0 | 0.1 |
| 7431 | 125b01 | AV640436 | HCL016c04 |   |   | 12.7  | 10.2  | 10.7  | 0.8 | 0.2 | 1.0 | 0.1 |
| 7432 | 108f07 | AV387918 | CM021b07  |   |   | 9.3   | 9.2   | 9.7   | 1.0 | 0.2 | 1.0 | 0.1 |
| 7433 | 136h01 | AV620937 | LC028h02  |   |   | 53.4  | 63.8  | 68.5  | 1.2 | 0.1 | 1.0 | 0.2 |
| 7434 | 141b09 | BP383814 | LC076c09  |   |   | 10.4  | 9.1   | 9.4   | 0.9 | 0.0 | 1.0 | 0.0 |
| 7435 | 124a03 | AV639919 | HCL007c02 |   |   | 22.6  | 21.5  | 22.4  | 1.0 | 0.1 | 1.0 | 0.1 |
| 7436 | 157e01 | BP086904 | MX019h03  |   |   | 7.8   | 7.8   | 8.7   | 1.0 | 0.2 | 1.0 | 0.5 |
| 7437 | 130f04 | AV643597 | HCL072e02 |   |   | 8.4   | 8.4   | 8.9   | 1.1 | 0.5 | 1.0 | 0.3 |
| 7438 | 134d03 | AV619207 | LC005b06  |   |   | 7.1   | 7.7   | 8.0   | 1.1 | 0.2 | 1.0 | 0.1 |
| 7439 | 112d10 | AV391839 | CM056h08  |   |   | 77.8  | 68.0  | 70.6  | 0.9 | 0.1 | 1.0 | 0.1 |
| 7440 | 111c05 | BP098640 | MXL096g08 |   |   | 24.0  | 20.3  | 21.0  | 0.8 | 0.1 | 1.0 | 0.1 |
| 7441 | 149f02 | AV628543 | LCL043e06 |   |   | 7.5   | 6.6   | 6.9   | 0.9 | 0.2 | 1.0 | 0.2 |
| 7442 | 147f03 | AV627611 | LCL029e02 |   |   | 16.6  | 15.6  | 16.2  | 0.9 | 0.1 | 1.0 | 0.1 |
| 7443 | 129g06 | BP383739 | HCL062b09 |   |   | 9.2   | 7.9   | 8.4   | 0.9 | 0.1 | 1.0 | 0.2 |
| 7444 | 168e06 | BP096556 | MXL060f09 |   |   | 16.0  | 18.9  | 21.7  | 1.2 | 0.1 | 1.0 | 0.4 |
| 7445 | 015a10 | AV640710 | HCL021b01 |   |   | 6.2   | 5.1   | 5.3   | 0.9 | 0.3 | 1.0 | 0.2 |
| 7446 | 162c06 | BP093600 | MXL010g04 |   |   | 26.8  | 23.4  | 24.4  | 0.9 | 0.5 | 1.0 | 0.4 |
| 7447 | 014c09 | AV639898 | HCL006h02 |   |   | 15.1  | 13.8  | 14.4  | 0.9 | 0.1 | 1.0 | 0.1 |
| 7448 | 141e06 | AV624556 | LC079d04  |   |   | 10.6  | 10.6  | 11.1  | 1.0 | 0.2 | 1.0 | 0.2 |
| 7449 | 114h06 | AV390012 | CM081h12  |   |   | 11.0  | 10.1  | 10.8  | 0.9 | 0.1 | 1.0 | 0.2 |
| 7450 | 151h07 | AV629725 | LCL064f08 |   |   | 6.3   | 5.9   | 6.1   | 0.9 | 0.3 | 1.0 | 0.2 |
| 7451 | 102g06 | AV394697 | CL27e11   |   |   | 12.5  | 11.3  | 13.5  | 0.9 | 0.2 | 1.0 | 0.5 |
| 7452 | 033f06 | BP094660 | MXL026f05 |   |   | 23.8  | 31.5  | 32.7  | 1.3 | 0.1 | 1.0 | 0.0 |
| 7453 | 164c08 | BP094703 | MXL027g08 |   |   | 23.1  | 14.0  | 14.8  | 1.0 | 0.6 | 1.0 | 0.2 |
| 7454 | 172g03 | BP098514 | MXL094e04 |   |   | 9.9   | 12.0  | 13.3  | 1.1 | 0.4 | 1.0 | 0.7 |
| 7455 | 125c03 | AV640508 | HCL017e09 |   |   | 5.9   | 6.6   | 7.0   | 1.1 | 0.3 | 1.0 | 0.2 |
| 7456 | 021f07 | AV622654 | LC052e06  |   |   | 5.0   | 4.2   | 4.4   | 0.8 | 0.1 | 1.0 | 0.3 |
| 7457 | 120h12 | AV636563 | HC061b06  |   |   | 6.7   | 6.7   | 7.0   | 1.0 | 0.2 | 1.0 | 0.1 |
| 7458 | 027c11 | AV629111 | LCL052c01 |   |   | 21.5  | 15.2  | 15.9  | 0.8 | 0.2 | 1.0 | 0.1 |
| 7459 | 148h07 | AV628234 | LCL038g11 |   |   | 38.3  | 42.4  | 44.2  | 1.1 | 0.2 | 1.0 | 0.1 |
| 7460 | 155g02 | AV631567 | LCL096c06 |   |   | 14.2  | 14.0  | 15.5  | 1.0 | 0.4 | 1.0 | 0.6 |
| 7461 | 129h06 | AV643109 | HCL063h06 |   |   | 5.4   | 4.8   | 5.0   | 0.9 | 0.2 | 1.0 | 0.1 |
| 7462 | 145f03 | AV626771 | LCL015b12 |   |   | 13.0  | 10.2  | 11.7  | 0.8 | 0.3 | 1.0 | 0.5 |
| 7463 | 014b01 | AV639733 | HCL003h12 |   |   | 14.0  | 13.3  | 14.1  | 0.9 | 0.2 | 1.0 | 0.4 |
| 7464 | 171c08 | BP097823 | MXL081h07 |   |   | 7.6   | 8.4   | 9.1   | 1.1 | 0.1 | 1.0 | 0.2 |
| 7465 | 129h04 | AV643076 | HCL063d01 |   |   | 24.1  | 22.2  | 32.1  | 0.9 | 0.1 | 1.0 | 0.6 |
| 7466 | 026d08 | AV628331 | LCL040b12 |   |   | 8.6   | 13.3  | 14.0  | 1.5 | 0.1 | 1.0 | 0.1 |
| 7467 | 135b04 | AV619722 | LC012c03  |   |   | 60.1  | 68.5  | 71.7  | 1.1 | 0.3 | 1.0 | 0.0 |
| 7468 | 018b05 | AV644201 | HCL083g09 |   |   | 28.6  | 43.2  | 44.5  | 2.2 | 1.6 | 1.0 | 0.1 |
| 7469 | 016b10 | AV641816 | HCL040g10 |   |   | 5.7   | 5.4   | 5.9   | 1.0 | 0.1 | 1.0 | 0.2 |
| 7470 | 034c03 | BP095515 | MXL043a05 |   |   | 9.4   | 6.2   | 6.6   | 0.7 | 0.1 | 1.0 | 0.3 |
| 7471 | 122b07 | AV637896 | HC079a09  |   |   | 12.7  | 10.5  | 11.4  | 0.8 | 0.1 | 1.0 | 0.2 |
| 7472 | 111h02 | AV391200 | CM051f08  |   |   | 6.8   | 8.0   | 8.3   | 1.2 | 0.2 | 1.0 | 0.0 |
| 7473 | 032c09 | BP093121 | MXL003g02 |   |   | 17.9  | 16.4  | 17.1  | 0.9 | 0.0 | 1.0 | 0.2 |
| 7474 | 001d05 | AV393803 | CL12a07   |   |   | 4.1   | 4.4   | 5.0   | 1.1 | 0.2 | 1.0 | 0.3 |
| 7475 | 010c09 | AV632554 | HC009f05  |   |   | 58.2  | 80.1  | 87.6  | 1.4 | 0.1 | 1.0 | 0.3 |
| 7476 | 030e05 | AV631704 | LCL098e01 |   |   | 3.1   | 2.0   | 2.1   | 0.8 | 0.4 | 1.0 | 0.2 |
| 7477 | 109d06 | AV387549 | CM026a09  |   |   | 5.8   | 6.6   | 7.3   | 1.1 | 0.1 | 1.0 | 0.3 |
| 7478 | 143c07 | AV625646 | LC095h08  |   |   | 49.9  | 42.9  | 44.9  | 0.9 | 0.0 | 1.0 | 0.1 |
| 7479 | 126c11 | AV641198 | HCL029f04 |   |   | 6.4   | 5.4   | 5.6   | 0.8 | 0.1 | 1.0 | 0.2 |
| 7480 | 103h06 | AV395501 | CL42g08   |   |   | 38.1  | 37.0  | 38.6  | 1.0 | 0.1 | 1.0 | 0.1 |
| 7481 | 016h08 | AV642697 | HCL056b11 |   |   | 9.6   | 8.4   | 10.1  | 0.9 | 0.4 | 1.0 | 0.5 |
| 7482 | 114h08 | AV390179 | CM082b04  |   |   | 23.4  | 23.7  | 24.8  | 1.0 | 0.2 | 1.0 | 0.2 |
| 7483 | 109c11 | AV388098 | CM025d05  |   |   | 11.7  | 5.7   | 6.0   | 0.5 | 0.2 | 1.0 | 0.2 |
| 7484 | 141c02 | AV624357 | LC076f04  |   |   | 330.0 | 350.4 | 372.6 | 1.1 | 0.1 | 1.0 | 0.2 |
| 7485 | 153g02 | AV630625 | LCL081g03 |   |   | 7.3   | 6.0   | 6.6   | 0.8 | 0.1 | 1.0 | 0.2 |
| 7486 | 161h07 | BP093377 | MXL007e12 |   |   | 4.8   | 4.9   | 7.1   | 1.1 | 1.0 | 1.0 | 1.0 |
| 7487 | 035a02 | BP096504 | MXL059g10 |   |   |       |       |       |     |     |     |     |

|      | A      | B        | C         | D | E | F     | G     | H     | I   | J   | K   | L   |
|------|--------|----------|-----------|---|---|-------|-------|-------|-----|-----|-----|-----|
| 7488 | 136a07 | AV620421 | LC022a01  |   |   | 11.6  | 12.6  | 13.2  | 1.1 | 0.1 | 1.0 | 0.1 |
| 7489 | 132g07 | AV644823 | HCL094c06 |   |   | 4.7   | 4.6   | 4.8   | 1.0 | 0.1 | 1.0 | 0.1 |
| 7490 | 138a12 | AV622088 | LCL044h02 |   |   | 216.4 | 112.0 | 118.3 | 0.5 | 0.0 | 1.0 | 0.2 |
| 7491 | 022f01 | AV624013 | LC071g06  |   |   | 19.5  | 20.2  | 25.8  | 1.1 | 0.2 | 1.0 | 0.4 |
| 7492 | 153a12 | AV630313 | LCL077a11 |   |   | 16.7  | 13.0  | 14.9  | 0.8 | 0.2 | 1.0 | 0.5 |
| 7493 | 025d05 | AV627313 | LCL024g12 |   |   | 20.2  | 22.3  | 23.7  | 1.1 | 0.1 | 1.0 | 0.1 |
| 7494 | 105b01 | AV396261 | CL57f09   |   |   | 8.9   | 11.8  | 13.5  | 1.5 | 0.6 | 1.0 | 0.4 |
| 7495 | 136d06 | AV620670 | LC025c06  |   |   | 33.6  | 29.8  | 32.5  | 0.9 | 0.1 | 1.0 | 0.2 |
| 7496 | 121a10 | AV636771 | HC063h12  |   |   | 20.2  | 20.4  | 21.9  | 1.1 | 0.4 | 1.0 | 0.2 |
| 7497 | 170c04 | BP097326 | MXL073h04 |   |   | 12.6  | 7.3   | 7.5   | 0.6 | 0.1 | 1.0 | 0.2 |
| 7498 | 016e01 | AV642256 | HCL048e02 |   |   | 13.3  | 16.5  | 18.5  | 1.2 | 0.2 | 1.0 | 0.4 |
| 7499 | 115a04 | AV390293 | CM082g10  |   |   | 7.7   | 9.1   | 9.5   | 1.3 | 0.4 | 1.0 | 0.1 |
| 7500 | 158h03 | BP087705 | MX041g12  |   |   | 4.6   | 6.0   | 6.9   | 1.3 | 0.4 | 1.0 | 0.5 |
| 7501 | 127a11 | AV641629 | HCL037g07 |   |   | 11.2  | 12.0  | 12.6  | 1.1 | 0.1 | 1.0 | 0.2 |
| 7502 | 020d09 | AV621022 | LC030a12  |   |   | 18.4  | 22.4  | 23.6  | 1.3 | 0.4 | 1.0 | 0.1 |
| 7503 | 133c10 | AV645011 | HCL097a02 |   |   | 20.0  | 18.0  | 19.2  | 0.9 | 0.2 | 1.0 | 0.2 |
| 7504 | 012d05 | AV636739 | HC063f01  |   |   | 28.7  | 24.2  | 25.0  | 0.8 | 0.3 | 1.0 | 0.5 |
| 7505 | 036f10 | BP098564 | MXL095e11 |   |   | 19.7  | 17.0  | 17.9  | 0.9 | 0.1 | 1.0 | 0.2 |
| 7506 | 030d08 | AV631659 | LCL097g05 |   |   | 17.7  | 18.6  | 19.5  | 1.1 | 0.1 | 1.0 | 0.1 |
| 7507 | 117c10 | AV632504 | HC009a09  |   |   | 152.1 | 158.1 | 168.2 | 1.1 | 0.4 | 1.0 | 0.3 |
| 7508 | 147h10 | AV627766 | LCL031g03 |   |   | 120.2 | 93.5  | 99.8  | 0.8 | 0.2 | 1.0 | 0.1 |
| 7509 | 023h02 | AV626175 | LCL003f05 |   |   | 8.6   | 8.9   | 9.8   | 1.1 | 0.4 | 1.0 | 0.3 |
| 7510 | 114c09 | AV389392 | CM075c12  |   |   | 6.8   | 6.2   | 6.7   | 1.0 | 0.3 | 1.0 | 0.2 |
| 7511 | 010c08 | AV632521 | HC009c05  |   |   | 48.0  | 37.2  | 39.5  | 0.8 | 0.2 | 1.0 | 0.2 |
| 7512 | 157d01 | BP086830 | MX017g12  |   |   | 17.2  | 12.4  | 13.2  | 0.7 | 0.1 | 1.0 | 0.1 |
| 7513 | 138g09 | AV622575 | LC051d11  |   |   | 11.9  | 14.5  | 14.8  | 1.2 | 0.4 | 1.0 | 0.3 |
| 7514 | 152f03 | AV630037 | LCL071g06 |   |   | 12.8  | 10.9  | 11.9  | 0.9 | 0.2 | 1.0 | 0.2 |
| 7515 | 117c12 | AV632519 | HC009c03  |   |   | 5.9   | 5.9   | 6.2   | 1.0 | 0.2 | 1.0 | 0.0 |
| 7516 | 120e03 | AV636070 | HC054g11  |   |   | 3.9   | 2.9   | 3.2   | 0.8 | 0.2 | 1.0 | 0.3 |
| 7517 | 142f03 | BP383825 | LC090d02  |   |   | 170.0 | 129.5 | 138.7 | 0.8 | 0.2 | 1.0 | 0.4 |
| 7518 | 144d06 | BP098824 | MXL099g04 |   |   | 84.3  | 75.6  | 79.9  | 0.9 | 0.1 | 1.0 | 0.1 |
| 7519 | 123d03 | AV639516 | HCL100d05 |   |   | 118.6 | 94.3  | 99.9  | 0.8 | 0.1 | 1.0 | 0.3 |
| 7520 | 013h08 | AV639630 | HCL002b03 |   |   | 11.0  | 11.7  | 13.5  | 1.1 | 0.4 | 1.0 | 0.5 |
| 7521 | 013e02 | AV638778 | HC090f09  |   |   | 38.8  | 40.6  | 42.8  | 1.0 | 0.1 | 1.0 | 0.2 |
| 7522 | 026e06 | AV628382 | LCL040h06 |   |   | 8.7   | 7.7   | 8.3   | 0.9 | 0.2 | 1.0 | 0.3 |
| 7523 | 142h01 | AV625461 | LC092h10  |   |   | 20.0  | 19.4  | 20.5  | 1.0 | 0.1 | 1.0 | 0.2 |
| 7524 | 160e10 | BP088744 | MX067g12  |   |   | 9.6   | 7.8   | 8.2   | 0.8 | 0.1 | 1.0 | 0.1 |
| 7525 | 117c07 | AV632456 | HC008e02  |   |   | 32.3  | 27.2  | 27.4  | 0.8 | 0.2 | 1.0 | 0.3 |
| 7526 | 133h01 | AV645231 | HCL100a01 |   |   | 16.5  | 16.7  | 21.8  | 1.1 | 0.2 | 1.0 | 0.5 |
| 7527 | 027e08 | AV629256 | LCL055d09 |   |   | 13.9  | 10.1  | 12.0  | 0.7 | 0.1 | 1.0 | 0.3 |
| 7528 | 164h08 | BP094983 | MXL033g09 |   |   | 11.8  | 7.1   | 8.1   | 0.7 | 0.5 | 1.0 | 0.6 |
| 7529 | 108c03 | BP383675 | CM017d07  |   |   | 55.2  | 49.5  | 52.0  | 0.9 | 0.1 | 1.0 | 0.1 |
| 7530 | 104b01 | AV395615 | CL44f10   |   |   | 10.1  | 8.8   | 9.4   | 0.9 | 0.4 | 1.0 | 0.4 |
| 7531 | 130h05 | AV643728 | HCL074h11 |   |   | 15.1  | 11.4  | 12.0  | 0.7 | 0.1 | 1.0 | 0.3 |
| 7532 | 111b06 | AV390204 | CM044a10  |   |   | 36.9  | 33.5  | 38.0  | 0.9 | 0.2 | 1.0 | 0.3 |
| 7533 | 015d04 | AV641074 | HCL027c09 |   |   | 20.1  | 21.1  | 23.2  | 1.1 | 0.1 | 1.0 | 0.2 |
| 7534 | 010h04 | AV633639 | HC023d02  |   |   | 179.4 | 86.9  | 97.5  | 0.5 | 0.4 | 1.0 | 0.7 |
| 7535 | 103e06 | AV395300 | CL38a07   |   |   | 3.8   | 4.4   | 9.1   | 1.2 | 0.1 | 1.0 | 0.9 |
| 7536 | 137c10 | AV621469 | LC036e11  |   |   | 317.5 | 315.4 | 333.4 | 1.0 | 0.1 | 1.0 | 0.2 |
| 7537 | 101d03 | AV393609 | CL06a07   |   |   | 8.6   | 7.5   | 8.1   | 0.9 | 0.1 | 1.0 | 0.2 |
| 7538 | 008c01 | AV393103 | CM067c11  |   |   | 22.8  | 36.2  | 39.5  | 1.6 | 0.1 | 1.0 | 0.2 |
| 7539 | 016e04 | AV642265 | HCL048f08 |   |   | 5.4   | 7.4   | 7.7   | 1.4 | 0.2 | 1.0 | 0.2 |
| 7540 | 129f03 | BP383737 | HCL061d12 |   |   | 104.2 | 54.6  | 59.7  | 0.5 | 0.2 | 1.0 | 0.5 |
| 7541 | 117d09 | AV632656 | HC011a01  |   |   | 23.3  | 23.9  | 25.1  | 1.1 | 0.3 | 1.0 | 0.0 |
| 7542 | 157g01 | BP087128 | MX026b05  |   |   | 11.1  | 10.2  | 12.9  | 0.9 | 0.2 | 1.0 | 0.6 |
| 7543 | 011g02 | AV635344 | HC045b11  |   |   | 7.3   | 7.3   | 7.8   | 1.0 | 0.1 | 1.0 | 0.2 |
| 7544 | 145c09 | AV626602 | LCL012b06 |   |   | 8.1   | 7.0   | 7.6   | 0.9 | 0.2 | 1.0 | 0.3 |
| 7545 | 014a08 | AV639692 | HCL003b10 |   |   | 56.2  | 59.2  | 70.8  | 1.1 | 0.0 | 1.0 | 0.3 |
| 7546 | 002a08 | AV394639 | CL29f03   |   |   | 9.5   | 11.9  | 13.5  | 1.3 | 0.3 | 1.0 | 0.3 |
| 7547 | 107h11 | AV387395 | CM014c01  |   |   | 5.4   | 5.4   | 5.7   | 1.0 | 0.1 | 1.0 | 0.0 |
| 7548 | 003a11 | AV395986 | CL53h07   |   |   | 7.9   | 5.1   | 7.2   | 0.8 | 0.6 | 1.0 | 0.8 |
| 7549 | 152a06 | AV629767 | LCL065f12 |   |   | 13.5  | 12.9  | 13.6  | 0.9 | 0.2 | 1.0 | 0.1 |
| 7550 | 008e05 | AV388500 | CM071a11  |   |   | 14.2  | 14.7  | 15.5  | 1.0 | 0.1 | 1.0 | 0.1 |
| 7551 | 126e06 | AV641313 | HCL031e02 |   |   | 11.0  | 9.4   | 10.2  | 0.8 | 0.2 | 1.0 | 0.4 |
| 7552 | 144b09 | AV626166 | LCL003e02 |   |   | 9.1   | 7.0   | 7.7   | 0.8 | 0.1 | 1.0 | 0.2 |
| 7553 | 119e02 | AV635060 | HC041d05  |   |   | 6.2   | 6.2   | 6.6   | 1.0 | 0.2 | 1.0 | 0.2 |
| 7554 | 006b11 | AV389406 | CM036e02  |   |   | 7.8   | 5.0   | 5.3   | 0.7 | 0.1 | 1.0 | 0.2 |
| 7555 | 033h12 | BP095119 | MXL036b05 |   |   | 27.1  | 29.5  | 31.6  | 1.1 | 0.2 | 1.0 | 0.5 |
| 7556 | 112e07 | AV391943 | CM057g04  |   |   | 131.8 | 158.2 | 166.7 | 1.2 | 0.0 | 1.0 | 0.1 |
| 7557 | 149a02 | AV628279 | LCL039e05 |   |   | 21.0  | 17.2  | 18.7  | 0.8 | 0.1 | 1.0 | 0.1 |
| 7558 | 155h05 | AV631642 | LCL097d12 |   |   | 69.5  | 46.4  | 48.8  | 0.7 | 0.2 | 1.0 | 0.1 |
| 7559 | 116c05 | AV392229 | CM097h08  |   |   | 28.2  | 25.3  | 29.3  | 0.9 | 0.0 | 1.0 | 0.3 |
| 7560 | 009b08 | AV390732 | CM085a02  |   |   | 7.4   | 8.7   | 9.4   | 1.2 | 0.2 | 1.0 | 0.3 |
| 7561 | 032g11 | BP093637 | MXL011c07 |   |   | 27.7  | 22.0  | 22.7  | 0.8 | 0.1 | 1.0 | 0.1 |
| 7562 | 019f12 | AV620201 | LC019a01  |   |   | 4.4   | 7.7   | 8.2   | 1.8 | 0.4 | 1.0 | 0.2 |
| 7563 | 168f05 | BP096632 | MXL062b03 |   |   | 11.1  | 9.8   | 13.4  | 1.1 | 0.7 | 1.0 | 0.7 |
| 7564 | 036b02 | BP097784 | MXL081c09 |   |   | 10.9  | 11.6  | 12.1  | 1.0 | 0.3 | 1.0 | 0.3 |
| 7565 | 017a07 | AV642813 | HCL058e08 |   |   | 9.5   | 12.3  | 12.8  | 1.4 | 0.8 | 1.0 | 0.3 |
| 7566 | 160f11 | BP089181 | MX202d02  |   |   | 6.8   | 4.6   | 4.9   | 0.7 | 0.1 | 1.0 | 0.1 |
| 7567 | 135a02 | AV619618 | LC010h02  |   |   | 7.0   | 6.5   | 6.8   | 0.9 | 0.1 | 1.0 | 0.2 |
| 7568 | 102e03 | AV394278 | CL22g10   |   |   | 29.0  | 21.6  | 22.7  | 0.8 | 0.2 | 1.0 | 0.1 |
| 7569 | 131g02 | AV644268 | HCL085b02 |   |   | 17.4  | 16.8  | 17.6  | 1.0 | 0.1 | 1.0 | 0.1 |
| 7570 | 143c06 | AV625645 | LC095h07  |   |   | 16.7  | 13.7  | 14.7  | 0.9 | 0.1 | 1.0 | 0.1 |
| 7571 | 019e09 | AV620027 | LC016e06  |   |   | 9.1   | 8.1   | 8.3   | 0.9 | 0.2 | 1.0 | 0.2 |
| 7572 | 015f05 | AV641271 | HCL030g12 |   |   | 19.5  | 18.5  | 20.8  | 1.0 | 0.1 | 1.0 | 0.2 |
| 7573 | 155e01 | AV631439 | LCL094a01 |   |   | 15.1  | 13.8  | 15.3  | 0.9 | 0.1 | 1.0 | 0.3 |
| 7574 | 118a11 | AV633427 | HC020f09  |   |   | 6.9   | 7.8   | 8.1   | 1.2 | 0.2 | 1.0 | 0.2 |
| 7575 | 104e03 | AV395736 | CL50f05   |   |   | 3.7   | 3.3   | 3.5   | 0.9 | 0.3 | 1.0 | 0.3 |
| 7576 | 010f10 | AV633358 | HC019h05  |   |   | 14.5  | 12.9  | 13.5  | 0.9 | 0.3 | 1.0 | 0.4 |
| 7577 | 163f06 | BP094406 | MXL022f06 |   |   | 10.4  | 12.5  | 13.8  | 1.2 | 0.3 | 1.0 | 0.3 |
| 7578 | 026d10 | AV628346 | LCL040d05 |   |   | 24.2  | 22.5  | 24.4  | 1.0 | 0.2 | 1.0 | 0.2 |
| 7579 | 150a12 | AV628835 | LCL047g05 |   |   | 9.7   | 8.4   | 8.8   | 0.9 | 0.1 | 1.0 | 0.1 |
| 7580 | 161g04 | BP083309 | MXL006e08 |   |   | 31.3  | 30.7  | 33.8  | 1.0 | 0.2 | 1.0 | 0.2 |
| 7581 | 111c09 | AV390388 | CM045g10  |   |   | 7.8   | 6.9   | 7.3   | 0.9 | 0.3 | 1.0 | 0.2 |
| 7582 | 006f01 | AV390190 | CM043e05  |   |   | 41.5  | 28.0  | 32.2  | 0.6 | 0.3 | 1.0 | 0.7 |
| 7583 | 128a01 | AV642103 | HCL045f11 |   |   | 9.3   | 6.9   | 7.4   | 0.8 | 0.1 | 1.0 | 0.1 |
| 7584 | 020b03 | AV620771 | LC026f03  |   |   | 8.6   | 6.1   | 6.7   | 0.8 | 0.3 | 1.0 | 0.2 |
| 7585 | 112g03 | AV392272 | CM060c11  |   |   | 81.5  | 64.4  | 80.2  | 0.8 | 0.2 | 1.0 | 0.5 |
| 7586 | 147f06 | AV627616 | LCL029e08 |   |   | 19.5  | 29.4  | 30.4  | 1.5 | 0.4 | 1.0 | 0.3 |
| 7587 | 147a01 | AV627330 | LCL025b07 |   |   | 20.8  | 14.8  | 15.7  | 0.7 | 0.1 | 1.0 | 0.1 |
| 7588 | 028f08 | AV630189 | LCL075a08 |   |   | 354.5 | 358.5 | 399.6 | 1.0 | 0.1 | 1.0 | 0.3 |
| 7589 | 138g08 | AV622568 | LC051c12  |   |   | 12.1  | 9.5   | 10.6  | 0.8 | 0.2 | 1.0 | 0.3 |
| 7590 | 103g12 | AV395464 | CL42d05   |   |   | 96.1  | 104.0 | 109.4 | 1.1 | 0.3 | 1.0 | 0.1 |
| 7591 | 154f08 | AV631072 | LCL088d04 |   |   | 7.0   | 7.3   | 7.7   | 1.0 | 0.2 | 1.0 | 0.3 |
| 7592 | 169f04 | BP097053 | MXL069c05 |   |   | 9.1   | 8.8   | 9.9   | 1.0 | 0.3 | 1.0 | 0.4 |
| 7593 | 027f06 | AV629317 | LCL056d11 |   |   | 10.5  | 8.7   | 9.3   | 0.8 | 0.1 | 1.0 | 0.4 |
| 759  |        |          |           |   |   |       |       |       |     |     |     |     |

|      | A      | B        | C         | D | E | F     | G     | H     | I   | J   | K   | L   |
|------|--------|----------|-----------|---|---|-------|-------|-------|-----|-----|-----|-----|
| 7595 | 010e12 | AV633029 | HC015g12  |   |   | 4.8   | 5.6   | 5.9   | 1.1 | 0.5 | 1.0 | 0.6 |
| 7596 | 127a10 | AV641619 | HCL037e10 |   |   | 13.2  | 13.0  | 13.7  | 1.0 | 0.1 | 1.0 | 0.1 |
| 7597 | 129e06 | AV642904 | HCL060c03 |   |   | 7.4   | 6.9   | 7.4   | 0.9 | 0.2 | 1.0 | 0.3 |
| 7598 | 027g09 | AV629436 | LCL058g03 |   |   | 10.4  | 8.4   | 9.8   | 0.8 | 0.2 | 1.0 | 0.4 |
| 7599 | 033a06 | BP093893 | MXL015c03 |   |   | 22.7  | 18.3  | 22.2  | 0.8 | 0.1 | 1.0 | 0.3 |
| 7600 | 107e06 | AV387017 | CM010c10  |   |   | 7.4   | 5.5   | 5.9   | 0.7 | 0.2 | 1.0 | 0.2 |
| 7601 | 147h05 | AV627744 | LCL031d07 |   |   | 5.1   | 4.3   | 4.8   | 0.8 | 0.1 | 1.0 | 0.2 |
| 7602 | 163e12 | BP094377 | MXL022c03 |   |   | 19.1  | 22.3  | 23.5  | 1.2 | 0.2 | 1.0 | 0.0 |
| 7603 | 118f08 | AV634035 | HC028d08  |   |   | 5.0   | 4.6   | 4.9   | 1.0 | 0.4 | 1.0 | 0.2 |
| 7604 | 171f12 | BP098045 | MXL085h05 |   |   | 9.6   | 10.0  | 10.2  | 1.0 | 0.2 | 1.0 | 0.4 |
| 7605 | 125g11 | AV640809 | HCL022g08 |   |   | 77.4  | 54.8  | 57.3  | 0.7 | 0.1 | 1.0 | 0.1 |
| 7606 | 016g12 | AV642621 | HCL054h02 |   |   | 22.6  | 15.7  | 20.0  | 0.7 | 0.2 | 1.0 | 0.6 |
| 7607 | 162f02 | BP093829 | MXL014d07 |   |   | 19.3  | 18.6  | 27.7  | 1.0 | 0.3 | 1.0 | 0.7 |
| 7608 | 124b10 | AV640045 | HCL009c12 |   |   | 17.9  | 17.8  | 18.8  | 1.0 | 0.2 | 1.0 | 0.1 |
| 7609 | 172e08 | BP098425 | MXL093b04 |   |   | 10.5  | 8.8   | 10.2  | 0.8 | 0.1 | 1.0 | 0.3 |
| 7610 | 023b08 | AV624732 | LC081h01  |   |   | 22.9  | 15.5  | 16.4  | 0.7 | 0.2 | 0.9 | 0.1 |
| 7611 | 140f05 | AV623962 | LC071a08  |   |   | 46.8  | 38.5  | 40.5  | 0.8 | 0.1 | 0.9 | 0.0 |
| 7612 | 152c07 | AV629879 | LCL068b08 |   |   | 27.0  | 23.9  | 25.4  | 0.9 | 0.0 | 0.9 | 0.1 |
| 7613 | 122g01 | AV638727 | HC090a06  |   |   | 7.5   | 8.2   | 8.4   | 1.1 | 0.4 | 0.9 | 0.3 |
| 7614 | 116a09 | AV392179 | CM095f10  |   |   | 4.0   | 3.0   | 3.2   | 0.8 | 0.2 | 0.9 | 0.2 |
| 7615 | 147h11 | AV627769 | LCL031g07 |   |   | 9.3   | 13.8  | 14.9  | 1.4 | 0.4 | 0.9 | 0.5 |
| 7616 | 005b12 | AV397447 | CM020g07  |   |   | 9.3   | 8.0   | 9.5   | 0.9 | 0.3 | 0.9 | 0.5 |
| 7617 | 143h07 | AV626038 | LCL001d12 |   |   | 7.2   | 3.8   | 4.2   | 0.6 | 0.2 | 0.9 | 0.2 |
| 7618 | 004b10 | AV386673 | CM004b10  |   |   | 6.4   | 6.6   | 6.9   | 1.0 | 0.4 | 0.9 | 0.4 |
| 7619 | 115b07 | AV390731 | CM084h10  |   |   | 14.0  | 17.4  | 18.7  | 1.2 | 0.2 | 0.9 | 0.3 |
| 7620 | 106d04 | AV397188 | CL79b11   |   |   | 6.1   | 6.0   | 6.7   | 1.0 | 0.2 | 0.9 | 0.4 |
| 7621 | 027e05 | AV629242 | LCL055b02 |   |   | 4.4   | 4.1   | 4.5   | 1.1 | 0.8 | 0.9 | 0.6 |
| 7622 | 167f10 | BP096151 | MXL053f06 |   |   | 313.5 | 262.9 | 275.2 | 0.8 | 0.1 | 0.9 | 0.1 |
| 7623 | 009b06 | AV390693 | CM084g12  |   |   | 131.8 | 148.6 | 159.0 | 1.1 | 0.1 | 0.9 | 0.2 |
| 7624 | 146g06 | AV627232 | LCL023c05 |   |   | 21.7  | 21.8  | 23.2  | 1.0 | 0.1 | 0.9 | 0.1 |
| 7625 | 147e08 | AV627584 | LCL029a05 |   |   | 6.8   | 7.7   | 8.1   | 1.1 | 0.3 | 0.9 | 0.3 |
| 7626 | 130c09 | AV643349 | HCL068b01 |   |   | 18.6  | 14.3  | 15.1  | 0.8 | 0.1 | 0.9 | 0.1 |
| 7627 | 014a02 | AV639663 | HCL002f07 |   |   | 10.1  | 11.4  | 14.4  | 1.1 | 0.2 | 0.9 | 0.5 |
| 7628 | 033b06 | BP094123 | MXL018e01 |   |   | 12.6  | 10.1  | 10.9  | 0.8 | 0.1 | 0.9 | 0.1 |
| 7629 | 029c09 | AV630750 | LCL083g04 |   |   | 8.3   | 8.7   | 9.4   | 1.1 | 0.1 | 0.9 | 0.4 |
| 7630 | 011e06 | AV635068 | HC041e02  |   |   | 10.1  | 7.4   | 7.8   | 0.8 | 0.2 | 0.9 | 0.0 |
| 7631 | 144e12 | AV626301 | LCL006c01 |   |   | 12.1  | 11.7  | 12.4  | 1.0 | 0.3 | 0.9 | 0.3 |
| 7632 | 112c06 | AV391665 | CM055f06  |   |   | 82.9  | 82.4  | 89.5  | 1.0 | 0.2 | 0.9 | 0.2 |
| 7633 | 133f10 | AV645151 | HCL098h03 |   |   | 6.8   | 6.6   | 7.1   | 1.0 | 0.0 | 0.9 | 0.1 |
| 7634 | 162f01 | BP093826 | MXL014d03 |   |   | 9.0   | 7.4   | 7.7   | 0.8 | 0.1 | 0.9 | 0.1 |
| 7635 | 164f06 | BP094839 | MXL030g12 |   |   | 17.9  | 12.6  | 14.1  | 0.8 | 0.4 | 0.9 | 0.2 |
| 7636 | 104f07 | AV395847 | CL52a12   |   |   | 4.6   | 4.1   | 4.3   | 0.9 | 0.2 | 0.9 | 0.1 |
| 7637 | 114e04 | AV387989 | CM077f07  |   |   | 50.4  | 59.7  | 67.9  | 1.2 | 0.1 | 0.9 | 0.2 |
| 7638 | 027h06 | AV629472 | LCL059d07 |   |   | 7.1   | 8.0   | 8.6   | 1.2 | 0.3 | 0.9 | 0.1 |
| 7639 | 165f12 | BP095318 | MXL039h04 |   |   | 6.5   | 5.9   | 6.6   | 1.0 | 0.2 | 0.9 | 0.3 |
| 7640 | 003f04 | AV396785 | CL69e12   |   |   | 5.5   | 5.2   | 5.9   | 0.9 | 0.1 | 0.9 | 0.3 |
| 7641 | 134g05 | AV619502 | LC009b10  |   |   | 7.6   | 7.0   | 7.2   | 0.9 | 0.3 | 0.9 | 0.2 |
| 7642 | 034e10 | BP095975 | MXL050d02 |   |   | 10.1  | 14.5  | 15.1  | 1.4 | 0.5 | 0.9 | 0.3 |
| 7643 | 108b02 | AV387473 | CM016e06  |   |   | 8.9   | 11.2  | 11.8  | 1.3 | 0.3 | 0.9 | 0.0 |
| 7644 | 153e02 | AV630492 | LCL079g01 |   |   | 32.7  | 25.9  | 29.5  | 0.8 | 0.1 | 0.9 | 0.3 |
| 7645 | 104d02 | AV397731 | CL49a04   |   |   | 21.6  | 16.9  | 21.8  | 0.8 | 0.5 | 0.9 | 0.7 |
| 7646 | 124b09 | AV640042 | HCL009c09 |   |   | 22.9  | 22.8  | 24.1  | 1.0 | 0.2 | 0.9 | 0.1 |
| 7647 | 138g05 | AV622558 | LC051c02  |   |   | 49.7  | 46.8  | 49.0  | 1.0 | 0.3 | 0.9 | 0.1 |
| 7648 | 126a11 | AV641010 | HCL026b08 |   |   | 30.4  | 29.6  | 31.6  | 1.0 | 0.2 | 0.9 | 0.1 |
| 7649 | 145f07 | AV626799 | LCL015f04 |   |   | 18.3  | 16.7  | 18.1  | 0.9 | 0.1 | 0.9 | 0.2 |
| 7650 | 130a12 | AV643242 | HCL066c06 |   |   | 5.4   | 8.9   | 9.3   | 1.6 | 0.2 | 0.9 | 0.2 |
| 7651 | 007d11 | AV391713 | CM055g09  |   |   | 16.5  | 21.9  | 23.3  | 1.4 | 0.3 | 0.9 | 0.1 |
| 7652 | 002f12 | AV395675 | CL47b04   |   |   | 2.5   | 2.1   | 2.8   | 0.8 | 0.3 | 0.9 | 0.7 |
| 7653 | 156g04 | BP086323 | MX006e09  |   |   | 19.5  | 14.0  | 17.0  | 0.7 | 0.3 | 0.9 | 0.6 |
| 7654 | 111g10 | AV391161 | CM051c11  |   |   | 15.2  | 13.5  | 14.4  | 0.9 | 0.0 | 0.9 | 0.1 |
| 7655 | 136e10 | AV620755 | LC026d08  |   |   | 128.7 | 106.0 | 117.1 | 0.8 | 0.3 | 0.9 | 0.1 |
| 7656 | 132a06 | AV644421 | HCL088c01 |   |   | 8.7   | 7.7   | 8.7   | 0.9 | 0.2 | 0.9 | 0.3 |
| 7657 | 133f12 | AV645169 | HCL099b04 |   |   | 15.5  | 14.3  | 17.8  | 0.9 | 0.1 | 0.9 | 0.4 |
| 7658 | 111g05 | AV391088 | CM050h12  |   |   | 12.9  | 12.8  | 13.7  | 1.0 | 0.1 | 0.9 | 0.2 |
| 7659 | 161e04 | BP093193 | MXL004g12 |   |   | 7.4   | 11.4  | 11.7  | 1.5 | 0.1 | 0.9 | 0.5 |
| 7660 | 001f02 | AV394138 | CL17f12   |   |   | 3.1   | 3.4   | 3.9   | 1.1 | 0.4 | 0.9 | 0.4 |
| 7661 | 102b02 | AV394071 | CL18g10   |   |   | 8.4   | 11.9  | 13.2  | 1.5 | 0.6 | 0.9 | 0.2 |
| 7662 | 128g05 | AV642506 | HCL053a04 |   |   | 14.5  | 15.5  | 16.6  | 1.1 | 0.1 | 0.9 | 0.1 |
| 7663 | 115g08 | AV391399 | CM091d06  |   |   | 5.6   | 7.1   | 8.1   | 1.2 | 0.3 | 0.9 | 0.5 |
| 7664 | 105g04 | AV396947 | CL68h04   |   |   | 9.3   | 10.4  | 11.4  | 1.1 | 0.1 | 0.9 | 0.2 |
| 7665 | 134g07 | AV619521 | LC009e03  |   |   | 24.2  | 18.3  | 20.5  | 0.8 | 0.1 | 0.9 | 0.3 |
| 7666 | 154e03 | AV630980 | LCL087b11 |   |   | 6.5   | 6.1   | 6.4   | 0.9 | 0.2 | 0.9 | 0.2 |
| 7667 | 128d09 | AV642366 | HCL050f02 |   |   | 16.4  | 14.6  | 15.5  | 0.9 | 0.2 | 0.9 | 0.3 |
| 7668 | 132h07 | AV644861 | HCL094g08 |   |   | 11.8  | 11.9  | 12.9  | 1.0 | 0.2 | 0.9 | 0.2 |
| 7669 | 130b12 | AV643301 | HCL067c03 |   |   | 6.3   | 7.3   | 8.0   | 1.2 | 0.1 | 0.9 | 0.3 |
| 7670 | 035a06 | BP096529 | MXL060c04 |   |   | 23.1  | 22.6  | 24.2  | 1.0 | 0.3 | 0.9 | 0.2 |
| 7671 | 020f05 | AV621261 | LC033e11  |   |   | 13.5  | 8.4   | 10.1  | 0.6 | 0.2 | 0.9 | 0.4 |
| 7672 | 154c02 | AV630863 | LCL085d05 |   |   | 14.2  | 11.5  | 12.4  | 0.8 | 0.1 | 0.9 | 0.2 |
| 7673 | 114d05 | AV389544 | CM076e01  |   |   | 59.1  | 57.2  | 60.7  | 1.0 | 0.0 | 0.9 | 0.1 |
| 7674 | 136g12 | AV620929 | LC028g03  |   |   | 10.9  | 9.4   | 10.4  | 0.9 | 0.1 | 0.9 | 0.2 |
| 7675 | 142e10 | AV625248 | LC089h08  |   |   | 11.3  | 12.8  | 13.5  | 1.2 | 0.2 | 0.9 | 0.2 |
| 7676 | 111d11 | AV390726 | CM047e01  |   |   | 50.5  | 59.9  | 63.1  | 1.5 | 0.6 | 0.9 | 0.2 |
| 7677 | 107f09 | AV386899 | CM011g03  |   |   | 127.9 | 126.4 | 143.7 | 1.0 | 0.2 | 0.9 | 0.5 |
| 7678 | 127b07 | AV641665 | HCL038d04 |   |   | 3.7   | 3.9   | 4.3   | 1.1 | 0.2 | 0.9 | 0.3 |
| 7679 | 008c09 | AV393263 | CM068g04  |   |   | 5.0   | 5.5   | 6.2   | 1.1 | 0.3 | 0.9 | 0.4 |
| 7680 | 163e01 | BP094295 | MXL020g03 |   |   | 4.9   | 6.0   | 6.4   | 1.3 | 0.4 | 0.9 | 0.3 |
| 7681 | 107c11 | AV397676 | CM009a03  |   |   | 4.6   | 4.3   | 4.6   | 0.9 | 0.1 | 0.9 | 0.1 |
| 7682 | 142g08 | AV625434 | LC092e05  |   |   | 11.0  | 8.5   | 9.1   | 0.8 | 0.1 | 0.9 | 0.1 |
| 7683 | 118h10 | AV634441 | HC033d10  |   |   | 13.3  | 12.0  | 15.0  | 0.9 | 0.1 | 0.9 | 0.4 |
| 7684 | 125a09 | AV640410 | HCL015g07 |   |   | 19.9  | 19.1  | 21.3  | 1.0 | 0.1 | 0.9 | 0.2 |
| 7685 | 149c08 | AV628438 | LCL041h03 |   |   | 12.7  | 10.5  | 11.1  | 0.8 | 0.1 | 0.9 | 0.0 |
| 7686 | 131a03 | AV643797 | HCL076c05 |   |   | 13.3  | 12.3  | 13.1  | 0.9 | 0.1 | 0.9 | 0.1 |
| 7687 | 120d06 | AV636013 | HC054a06  |   |   | 7.7   | 7.4   | 8.2   | 1.0 | 0.1 | 0.9 | 0.3 |
| 7688 | 035f10 | BP097292 | MXL073b07 |   |   | 10.7  | 9.1   | 11.0  | 0.9 | 0.2 | 0.9 | 0.5 |
| 7689 | 110b03 | AV388897 | CM033f03  |   |   | 5.2   | 8.4   | 9.2   | 1.6 | 0.4 | 0.9 | 0.3 |
| 7690 | 131f08 | AV644241 | HCL084e12 |   |   | 5.7   | 4.8   | 5.2   | 0.9 | 0.1 | 0.9 | 0.1 |
| 7691 | 140c12 | AV623768 | LC068d05  |   |   | 49.4  | 46.6  | 52.9  | 0.9 | 0.1 | 0.9 | 0.2 |
| 7692 | 030e11 | AV631779 | LCL099f12 |   |   | 15.1  | 13.8  | 14.9  | 1.0 | 0.2 | 0.9 | 0.1 |
| 7693 | 162h11 | BP094009 | MXL016h08 |   |   | 6.7   | 6.5   | 7.9   | 0.9 | 0.3 | 0.9 | 0.8 |
| 7694 | 170h09 | BP097659 | MXL079b10 |   |   | 11.5  | 7.9   | 14.1  | 0.7 | 0.2 | 0.9 | 0.8 |
| 7695 | 159h11 | BP088225 | MX054e11  |   |   | 5.1   | 5.4   | 7.5   | 1.1 | 0.6 | 0.9 | 0.7 |
| 7696 | 102g10 | AV394793 | CL28b02   |   |   | 46.8  | 52.1  | 55.1  | 1.1 | 0.2 | 0.9 | 0.0 |
| 7697 | 108b03 | AV387444 | CM016f01  |   |   | 55.6  | 77.7  | 82.5  | 1.6 | 0.6 | 0.9 | 0.0 |
| 7698 | 163h11 | BP094577 | MXL025b09 |   |   | 3.3   | 3.0   | 3.3   | 0.8 | 0.2 | 0.9 | 0.7 |
| 7699 | 030c08 | AV631520 | LCL095e04 |   |   | 12.5  | 11.8  | 13.6  | 0.9 | 0.1 | 0.9 | 0.3 |
| 7700 | 127c04 | AV641704 | HCL039a02 |   |   | 8.2   | 9.3   | 9.7   | 1.1 | 0.4 | 0.9 | 0.2 |
| 7701 | 110h05 | AV389913 |           |   |   |       |       |       |     |     |     |     |

|      | A      | B        | C         | D | E | F     | G     | H     | I   | J   | K   | L   |
|------|--------|----------|-----------|---|---|-------|-------|-------|-----|-----|-----|-----|
| 7702 | 130f09 | AV643633 | HCL073b02 |   |   | 7.0   | 8.9   | 11.5  | 1.3 | 0.2 | 0.9 | 0.5 |
| 7703 | 125d06 | AV640608 | HCL019b03 |   |   | 50.7  | 49.4  | 53.3  | 1.0 | 0.2 | 0.9 | 0.2 |
| 7704 | 132b02 | AV644488 | HCL089d05 |   |   | 19.2  | 18.1  | 19.0  | 0.9 | 0.2 | 0.9 | 0.1 |
| 7705 | 156f02 | BP086219 | MX004d03  |   |   | 6.6   | 8.4   | 9.3   | 1.3 | 0.2 | 0.9 | 0.2 |
| 7706 | 138f02 | AV622394 | LC049b03  |   |   | 8.1   | 6.2   | 6.6   | 0.8 | 0.2 | 0.9 | 0.3 |
| 7707 | 010e11 | AV633026 | HC015g08  |   |   | 51.8  | 72.1  | 81.9  | 1.4 | 0.1 | 0.9 | 0.4 |
| 7708 | 108c10 | AV388178 | CM017h04  |   |   | 10.2  | 10.4  | 11.5  | 1.1 | 0.2 | 0.9 | 0.3 |
| 7709 | 106f03 | AV386531 | CM001h05  |   |   | 16.8  | 13.0  | 13.8  | 0.8 | 0.2 | 0.9 | 0.1 |
| 7710 | 012c01 | AV636361 | HC058e05  |   |   | 6.8   | 9.1   | 9.6   | 1.3 | 0.1 | 0.9 | 0.1 |
| 7711 | 002a11 | AV394746 | CL30c01   |   |   | 24.9  | 19.6  | 23.6  | 0.8 | 0.3 | 0.9 | 0.5 |
| 7712 | 136f11 | AV620820 | LC027c08  |   |   | 12.2  | 11.5  | 12.3  | 0.9 | 0.1 | 0.9 | 0.1 |
| 7713 | 032g10 | BP093632 | MXL011b12 |   |   | 14.2  | 13.5  | 15.4  | 0.9 | 0.1 | 0.9 | 0.4 |
| 7714 | 014d01 | AV639938 | HCL007e12 |   |   | 0.6   | 1.2   | 1.2   | 2.1 | 1.1 | 0.9 | 0.3 |
| 7715 | 103b04 | AV394828 | CL32b02   |   |   | 5.2   | 4.2   | 4.5   | 0.8 | 0.1 | 0.9 | 0.1 |
| 7716 | 119b03 | AV634624 | HC035g04  |   |   | 20.5  | 14.3  | 15.3  | 0.7 | 0.1 | 0.9 | 0.2 |
| 7717 | 022e11 | AV624001 | LC071f01  |   |   | 7.2   | 6.0   | 6.5   | 0.9 | 0.2 | 0.9 | 0.2 |
| 7718 | 148g03 | AV628155 | LCL037e11 |   |   | 21.8  | 19.9  | 21.2  | 0.9 | 0.2 | 0.9 | 0.1 |
| 7719 | 129g09 | AV643027 | HCL062e05 |   |   | 19.1  | 19.0  | 20.1  | 1.0 | 0.1 | 0.9 | 0.1 |
| 7720 | 124c11 | AV640106 | HCL010e04 |   |   | 16.5  | 21.9  | 23.1  | 1.3 | 0.1 | 0.9 | 0.1 |
| 7721 | 005h12 | AV388763 | CM032a09  |   |   | 7.7   | 5.1   | 5.4   | 0.7 | 0.1 | 0.9 | 0.3 |
| 7722 | 150a01 | AV628765 | LCL046g04 |   |   | 16.1  | 11.2  | 11.6  | 0.7 | 0.2 | 0.9 | 0.2 |
| 7723 | 108f08 | AV387927 | CM021c01  |   |   | 24.9  | 13.7  | 16.6  | 0.6 | 0.2 | 0.9 | 0.5 |
| 7724 | 114h10 | AV390180 | CM082c09  |   |   | 28.0  | 34.3  | 36.6  | 1.2 | 0.3 | 0.9 | 0.2 |
| 7725 | 108b07 | AV387467 | CM016h07  |   |   | 6.0   | 5.0   | 5.2   | 0.8 | 0.4 | 0.9 | 0.3 |
| 7726 | 158f07 | BP087680 | MX041c06  |   |   | 4.5   | 5.3   | 6.0   | 1.2 | 0.2 | 0.9 | 0.3 |
| 7727 | 152e02 | AV629993 | LCL070f08 |   |   | 16.8  | 14.8  | 17.1  | 0.9 | 0.2 | 0.9 | 0.3 |
| 7728 | 104h01 | AV396146 | CL54f03   |   |   | 27.5  | 30.3  | 32.1  | 1.3 | 0.5 | 0.9 | 0.1 |
| 7729 | 150c06 | AV628932 | LCL049b07 |   |   | 13.7  | 11.1  | 12.0  | 0.9 | 0.2 | 0.9 | 0.1 |
| 7730 | 011f05 | AV635227 | HC043e12  |   |   | 19.2  | 37.7  | 40.9  | 2.0 | 0.3 | 0.9 | 0.1 |
| 7731 | 034h09 | BP096431 | MXL058f05 |   |   | 5.5   | 4.9   | 6.2   | 0.9 | 0.2 | 0.9 | 0.5 |
| 7732 | 022e12 | AV624005 | LC071f06  |   |   | 33.7  | 33.7  | 35.8  | 1.0 | 0.2 | 0.9 | 0.1 |
| 7733 | 128a10 | AV642153 | HCL046e03 |   |   | 16.0  | 14.4  | 16.3  | 0.9 | 0.1 | 0.9 | 0.3 |
| 7734 | 161f10 | BP093267 | MXL005h06 |   |   | 21.7  | 17.2  | 18.2  | 0.8 | 0.1 | 0.9 | 0.2 |
| 7735 | 143g08 | AV625945 | LC100b05  |   |   | 6.0   | 4.7   | 5.1   | 0.8 | 0.1 | 0.9 | 0.1 |
| 7736 | 015h10 | AV641537 | HCL035g05 |   |   | 18.7  | 14.6  | 16.9  | 0.8 | 0.2 | 0.9 | 0.4 |
| 7737 | 001a07 | AV397594 | CL02d05   |   |   | 4.1   | 3.2   | 3.9   | 0.8 | 0.3 | 0.9 | 0.5 |
| 7738 | 120b09 | AV635846 | HC051g05  |   |   | 15.6  | 13.9  | 14.4  | 0.9 | 0.3 | 0.9 | 0.2 |
| 7739 | 004f06 | AV386937 | CM011g06  |   |   | 150.9 | 211.7 | 229.7 | 1.4 | 0.2 | 0.9 | 0.2 |
| 7740 | 140b10 | AV623664 | LC067a01  |   |   | 19.0  | 15.7  | 16.9  | 0.8 | 0.2 | 0.9 | 0.2 |
| 7741 | 166f09 | BP095731 | MXL046e07 |   |   | 8.6   | 26.1  | 26.2  | 3.2 | 2.3 | 0.9 | 0.5 |
| 7742 | 106b03 | AV397101 | CL75b07   |   |   | 19.2  | 27.5  | 28.9  | 1.4 | 0.1 | 0.9 | 0.1 |
| 7743 | 104a08 | AV395611 | CL44a10   |   |   | 5.2   | 5.5   | 7.9   | 1.2 | 0.5 | 0.9 | 0.6 |
| 7744 | 013c03 | AV638230 | HC083e12  |   |   | 6.7   | 4.8   | 5.2   | 0.8 | 0.3 | 0.9 | 0.1 |
| 7745 | 108h11 | AV387888 | CM022h01  |   |   | 9.8   | 7.8   | 8.3   | 0.8 | 0.1 | 0.9 | 0.2 |
| 7746 | 117a08 | BP383688 | HC004c08  |   |   | 10.6  | 9.3   | 10.8  | 0.9 | 0.0 | 0.9 | 0.3 |
| 7747 | 141a10 | AV624256 | LC075b10  |   |   | 37.7  | 30.4  | 32.6  | 0.8 | 0.2 | 0.9 | 0.2 |
| 7748 | 019f06 | AV620131 | LC018a04  |   |   | 15.7  | 23.8  | 25.5  | 1.7 | 0.6 | 0.9 | 0.1 |
| 7749 | 006d03 | AV389750 | CM039f06  |   |   | 31.6  | 20.4  | 21.7  | 0.6 | 0.2 | 0.9 | 0.3 |
| 7750 | 105a04 | AV396074 | CL56d01   |   |   | 4.2   | 5.0   | 5.8   | 1.2 | 0.2 | 0.9 | 0.4 |
| 7751 | 033c07 | BP094228 | MXL019h01 |   |   | 9.5   | 6.7   | 7.6   | 0.7 | 0.1 | 0.9 | 0.3 |
| 7752 | 130h06 | AV643739 | HCL075b05 |   |   | 4.4   | 4.2   | 4.7   | 1.0 | 0.3 | 0.9 | 0.2 |
| 7753 | 011g12 | AV635545 | HC047f12  |   |   | 15.4  | 10.7  | 11.3  | 0.8 | 0.2 | 0.9 | 0.2 |
| 7754 | 144h07 | AV626426 | LCL008h02 |   |   | 24.9  | 14.4  | 15.9  | 0.6 | 0.1 | 0.9 | 0.3 |
| 7755 | 140c04 | AV623700 | LC067e02  |   |   | 14.4  | 10.9  | 11.7  | 0.8 | 0.1 | 0.9 | 0.2 |
| 7756 | 114d08 | AV389676 | CM076f03  |   |   | 44.1  | 54.0  | 55.9  | 1.2 | 0.4 | 0.9 | 0.3 |
| 7757 | 123f10 | AV639720 | HCL003f11 |   |   | 13.1  | 13.2  | 14.1  | 1.0 | 0.2 | 0.9 | 0.2 |
| 7758 | 101e05 | AV393657 | CL10d02   |   |   | 11.1  | 12.1  | 12.9  | 1.1 | 0.4 | 0.9 | 0.2 |
| 7759 | 166f02 | BP095716 | MXL046c12 |   |   | 15.0  | 11.5  | 12.3  | 0.7 | 0.2 | 0.9 | 0.4 |
| 7760 | 133a05 | AV644883 | HCL095a12 |   |   | 16.0  | 12.8  | 14.1  | 0.8 | 0.1 | 0.9 | 0.2 |
| 7761 | 148c06 | AV627940 | LCL034b11 |   |   | 8.9   | 7.6   | 8.2   | 0.9 | 0.3 | 0.9 | 0.2 |
| 7762 | 106h12 | AV386679 | CM004d11  |   |   | 5.3   | 7.3   | 8.0   | 1.4 | 0.1 | 0.9 | 0.2 |
| 7763 | 033a01 | BP093825 | MXL014d02 |   |   | 13.5  | 13.6  | 14.8  | 1.0 | 0.0 | 0.9 | 0.1 |
| 7764 | 113c02 | AV392865 | CM065a05  |   |   | 4.1   | 4.3   | 4.6   | 1.0 | 0.1 | 0.9 | 0.1 |
| 7765 | 033b10 | BP094163 | MXL018h12 |   |   | 55.9  | 57.7  | 60.0  | 1.0 | 0.1 | 0.9 | 0.1 |
| 7766 | 013b08 | AV638128 | HC082c09  |   |   | 11.1  | 8.6   | 9.5   | 0.9 | 0.2 | 0.9 | 0.1 |
| 7767 | 110b05 | AV388935 | CM033g05  |   |   | 31.6  | 8.5   | 9.2   | 0.4 | 0.2 | 0.9 | 0.5 |
| 7768 | 129e09 | AV642919 | HCL060d11 |   |   | 18.5  | 14.8  | 16.7  | 0.8 | 0.1 | 0.9 | 0.3 |
| 7769 | 154b03 | AV630805 | LCL084e07 |   |   | 31.6  | 26.6  | 29.3  | 0.8 | 0.2 | 0.9 | 0.1 |
| 7770 | 021e06 | AV622506 | LC050e11  |   |   | 20.0  | 18.1  | 19.5  | 0.9 | 0.1 | 0.9 | 0.1 |
| 7771 | 102c09 | AV394308 | CL20f11   |   |   | 28.4  | 18.3  | 19.5  | 0.6 | 0.3 | 0.9 | 0.1 |
| 7772 | 121h02 | AV637595 | HC075b09  |   |   | 132.7 | 121.6 | 135.7 | 0.9 | 0.1 | 0.9 | 0.2 |
| 7773 | 113c04 | AV392879 | CM065b03  |   |   | 235.9 | 248.2 | 271.3 | 1.1 | 0.1 | 0.9 | 0.2 |
| 7774 | 152d10 | AV629973 | LCL070c07 |   |   | 6.6   | 6.1   | 6.5   | 0.9 | 0.2 | 0.9 | 0.1 |
| 7775 | 136a06 | AV620414 | LC021h03  |   |   | 7.0   | 15.0  | 17.1  | 2.2 | 0.4 | 0.9 | 0.3 |
| 7776 | 172e04 | BP098403 | MXL092g11 |   |   | 13.1  | 15.3  | 20.0  | 1.2 | 0.2 | 0.9 | 0.5 |
| 7777 | 128e04 | AV642415 | HCL051d09 |   |   | 22.1  | 22.6  | 24.5  | 1.0 | 0.1 | 0.9 | 0.1 |
| 7778 | 124c08 | AV640088 | HCL010b04 |   |   | 5.4   | 4.4   | 5.0   | 0.8 | 0.1 | 0.9 | 0.3 |
| 7779 | 111f11 | AV391050 | CM050d07  |   |   | 13.4  | 11.4  | 12.3  | 0.9 | 0.2 | 0.9 | 0.2 |
| 7780 | 034d11 | BP095787 | MXL047d07 |   |   | 2.6   | 2.1   | 2.1   | 0.8 | 0.3 | 0.9 | 0.2 |
| 7781 | 017a09 | AV642844 | HCL059b06 |   |   | 3.3   | 4.0   | 4.5   | 1.2 | 0.2 | 0.9 | 0.3 |
| 7782 | 014g11 | AV640461 | HCL018f09 |   |   | 7.9   | 6.7   | 7.3   | 0.9 | 0.0 | 0.9 | 0.4 |
| 7783 | 005f06 | AV387640 | CM027d06  |   |   | 25.2  | 33.5  | 36.8  | 1.3 | 0.1 | 0.9 | 0.1 |
| 7784 | 013b09 | AV638138 | HC082d11  |   |   | 14.2  | 27.7  | 30.1  | 2.0 | 0.2 | 0.9 | 0.2 |
| 7785 | 141c04 | AV624368 | LC076g07  |   |   | 16.8  | 14.6  | 15.6  | 0.9 | 0.4 | 0.9 | 0.1 |
| 7786 | 117a02 | AV632064 | HC003d11  |   |   | 10.5  | 14.0  | 15.3  | 1.4 | 0.3 | 0.9 | 0.2 |
| 7787 | 123a06 | AV639129 | HC095d01  |   |   | 18.6  | 20.3  | 22.0  | 1.1 | 0.2 | 0.9 | 0.1 |
| 7788 | 107g05 | AV387135 | CM012d06  |   |   | 4.0   | 3.5   | 3.8   | 0.9 | 0.2 | 0.9 | 0.2 |
| 7789 | 020f10 | AV621347 | LC034g07  |   |   | 4.8   | 3.6   | 3.9   | 0.8 | 0.2 | 0.9 | 0.2 |
| 7790 | 102b06 | AV394165 | CL19d01   |   |   | 2.6   | 2.7   | 3.0   | 1.0 | 0.1 | 0.9 | 0.3 |
| 7791 | 110a12 | AV388864 | CM033c09  |   |   | 9.4   | 9.9   | 13.3  | 1.2 | 0.5 | 0.9 | 0.6 |
| 7792 | 125d03 | AV640602 | HCL018h12 |   |   | 14.1  | 12.5  | 13.4  | 0.9 | 0.3 | 0.9 | 0.3 |
| 7793 | 133h12 | AV645299 | HCL100g09 |   |   | 27.0  | 25.0  | 33.2  | 0.9 | 0.1 | 0.9 | 0.5 |
| 7794 | 116f12 | AV397997 | CS001g11  |   |   | 9.7   | 10.0  | 10.8  | 1.0 | 0.1 | 0.9 | 0.1 |
| 7795 | 126a03 | AV640909 | HCL024e06 |   |   | 9.2   | 9.0   | 9.6   | 1.0 | 0.2 | 0.9 | 0.1 |
| 7796 | 019f05 | AV620117 | LC017g10  |   |   | 15.2  | 10.5  | 11.3  | 0.7 | 0.1 | 0.9 | 0.2 |
| 7797 | 123d08 | AV639565 | HCL001a12 |   |   | 6.4   | 5.5   | 5.9   | 0.9 | 0.1 | 0.9 | 0.1 |
| 7798 | 149d07 | AV628475 | LCL042d11 |   |   | 14.8  | 13.0  | 14.5  | 0.9 | 0.1 | 0.9 | 0.3 |
| 7799 | 103h02 | AV395505 | CL42f07   |   |   | 4.2   | 4.2   | 4.5   | 1.0 | 0.2 | 0.9 | 0.2 |
| 7800 | 146h11 | AV627319 | LCL024h10 |   |   | 37.5  | 39.0  | 46.4  | 1.0 | 0.2 | 0.9 | 0.4 |
| 7801 | 111g09 | AV391147 | CM051c04  |   |   | 11.7  | 10.2  | 11.0  | 0.9 | 0.1 | 0.9 | 0.1 |
| 7802 | 130c10 | AV643373 | HCL068e06 |   |   | 8.9   | 7.4   | 8.0   | 0.8 | 0.1 | 0.9 | 0.2 |
| 7803 | 022g06 | AV624192 | LC074b12  |   |   | 25.9  | 28.5  | 30.4  | 1.1 | 0.1 | 0.9 | 0.1 |
| 7804 | 151c09 | AV629413 | LCL058c12 |   |   | 16.1  | 12.4  | 13.5  | 0.8 | 0.1 | 0.9 | 0.2 |
| 7805 | 121b03 | AV636829 | HC064g09  |   |   | 11.4  | 7.8   | 8.6   | 0.7 | 0.1 | 0.9 | 0.3 |
| 7806 | 032c05 | BP093072 | MXL003a03 |   |   | 12.7  | 12.0  | 13.2  | 1.0 | 0.1 | 0.9 | 0.2 |
| 7807 | 005g10 | AV388423 | CM029f03  |   |   | 17.2  | 15.8  | 17.0  | 0.9 | 0.2 | 0.9 | 0.2 |
| 7808 | 036e08 | BP09     |           |   |   |       |       |       |     |     |     |     |

|      | A      | B        | C         | D | E | F     | G     | H     | I   | J   | K   | L   |
|------|--------|----------|-----------|---|---|-------|-------|-------|-----|-----|-----|-----|
| 7809 | 033a07 | BP093907 | MXL015d10 |   |   | 8.6   | 7.4   | 7.9   | 0.9 | 0.1 | 0.9 | 0.0 |
| 7810 | 017a06 | AV642807 | HCL058d09 |   |   | 11.6  | 12.0  | 12.8  | 1.3 | 0.9 | 0.9 | 0.1 |
| 7811 | 152h06 | AV630233 | LCL075g12 |   |   | 15.5  | 13.3  | 16.8  | 0.9 | 0.2 | 0.9 | 0.4 |
| 7812 | 143d02 | BP098798 | MXL099c10 |   |   | 16.3  | 12.1  | 13.6  | 0.8 | 0.2 | 0.9 | 0.2 |
| 7813 | 017c07 | AV643044 | HCL062g07 |   |   | 6.1   | 5.9   | 6.3   | 1.0 | 0.3 | 0.9 | 0.0 |
| 7814 | 109f06 | AV388027 | CM028c06  |   |   | 5.9   | 4.5   | 4.8   | 0.8 | 0.2 | 0.9 | 0.2 |
| 7815 | 123h12 | AV639884 | HCL006f07 |   |   | 20.7  | 21.1  | 24.0  | 1.0 | 0.2 | 0.9 | 0.3 |
| 7816 | 031c05 | BP086670 | MX014a08  |   |   | 12.8  | 10.9  | 11.6  | 0.8 | 0.1 | 0.9 | 0.2 |
| 7817 | 123h11 | AV639882 | HCL006f04 |   |   | 14.3  | 14.2  | 19.0  | 1.0 | 0.1 | 0.9 | 0.6 |
| 7818 | 126h08 | AV641553 | HCL036b08 |   |   | 9.5   | 10.2  | 11.6  | 1.1 | 0.2 | 0.9 | 0.3 |
| 7819 | 139h02 | AV623414 | LC063d12  |   |   | 11.6  | 12.1  | 12.9  | 1.0 | 0.2 | 0.9 | 0.2 |
| 7820 | 148c02 | AV627893 | LCL033e02 |   |   | 32.9  | 27.4  | 30.5  | 0.9 | 0.2 | 0.9 | 0.2 |
| 7821 | 128c06 | AV642255 | HCL048d09 |   |   | 5.3   | 4.2   | 4.6   | 0.8 | 0.4 | 0.9 | 0.3 |
| 7822 | 160g02 | BP089227 | MX203c01  |   |   | 36.6  | 31.2  | 33.8  | 0.9 | 0.0 | 0.9 | 0.2 |
| 7823 | 126f11 | AV641391 | HCL032g07 |   |   | 5.1   | 4.9   | 5.3   | 1.0 | 0.2 | 0.9 | 0.2 |
| 7824 | 154b04 | AV630811 | LCL084f07 |   |   | 10.7  | 8.3   | 9.2   | 0.8 | 0.1 | 0.9 | 0.3 |
| 7825 | 008f02 | AV388733 | CM072b10  |   |   | 13.7  | 13.4  | 14.8  | 1.1 | 0.4 | 0.9 | 0.2 |
| 7826 | 005d02 | AV387859 | CM022f07  |   |   | 7.3   | 12.6  | 13.4  | 1.7 | 0.2 | 0.9 | 0.2 |
| 7827 | 027h01 | AV629449 | LCL058h10 |   |   | 12.1  | 9.1   | 10.9  | 0.8 | 0.1 | 0.9 | 0.4 |
| 7828 | 118a08 | AV633370 | HC020a07  |   |   | 16.5  | 12.3  | 13.2  | 0.7 | 0.1 | 0.9 | 0.1 |
| 7829 | 159e12 | BP087876 | MX045e08  |   |   | 7.2   | 8.9   | 9.4   | 1.2 | 0.2 | 0.9 | 0.2 |
| 7830 | 112f03 | AV392095 | CM058c01  |   |   | 28.3  | 18.4  | 20.5  | 0.7 | 0.1 | 0.9 | 0.2 |
| 7831 | 105d07 | AV396522 | CL63b07   |   |   | 2.4   | 2.6   | 3.0   | 1.1 | 0.3 | 0.9 | 0.6 |
| 7832 | 128b04 | AV642189 | HCL047b04 |   |   | 13.3  | 14.1  | 15.4  | 1.1 | 0.1 | 0.9 | 0.3 |
| 7833 | 021c04 | AV622116 | LC045c10  |   |   | 18.1  | 21.4  | 23.5  | 1.3 | 0.3 | 0.9 | 0.1 |
| 7834 | 147g08 | AV627681 | LCL030e02 |   |   | 15.8  | 14.6  | 15.7  | 0.9 | 0.1 | 0.9 | 0.1 |
| 7835 | 118a10 | AV633423 | HC020f05  |   |   | 40.2  | 43.5  | 48.8  | 1.1 | 0.1 | 0.9 | 0.3 |
| 7836 | 027f07 | AV629319 | LCL056e02 |   |   | 2.6   | 1.9   | 2.4   | 0.9 | 0.3 | 0.9 | 0.4 |
| 7837 | 155d12 | AV631436 | LCL093h07 |   |   | 28.6  | 34.2  | 37.5  | 1.2 | 0.2 | 0.9 | 0.1 |
| 7838 | 016b05 | AV641718 | HCL039c06 |   |   | 14.1  | 17.5  | 19.3  | 1.3 | 0.4 | 0.9 | 0.3 |
| 7839 | 114b05 | AV389016 | CM073g05  |   |   | 10.2  | 9.7   | 11.4  | 1.0 | 0.2 | 0.9 | 0.3 |
| 7840 | 024g05 | AV626804 | LCL015g03 |   |   | 26.0  | 23.1  | 25.7  | 0.9 | 0.1 | 0.9 | 0.2 |
| 7841 | 106e04 | AV386459 | CM001b04  |   |   | 77.7  | 85.0  | 87.0  | 1.0 | 0.4 | 0.9 | 0.3 |
| 7842 | 124c03 | AV640076 | HCL009h07 |   |   | 28.5  | 24.0  | 25.9  | 0.8 | 0.1 | 0.9 | 0.1 |
| 7843 | 127d05 | AV641772 | HCL040a03 |   |   | 13.6  | 16.1  | 18.9  | 1.2 | 0.3 | 0.9 | 0.4 |
| 7844 | 113c09 | AV392918 | CM065d09  |   |   | 5.7   | 4.7   | 5.6   | 0.9 | 0.2 | 0.9 | 0.4 |
| 7845 | 012a08 | AV635946 | HC053b06  |   |   | 13.5  | 14.9  | 16.2  | 1.1 | 0.2 | 0.9 | 0.2 |
| 7846 | 134d09 | AV619235 | LC005e06  |   |   | 8.4   | 7.4   | 8.0   | 0.9 | 0.1 | 0.9 | 0.1 |
| 7847 | 104d11 | AV395732 | CL50d01   |   |   | 6.9   | 8.5   | 10.1  | 1.2 | 0.2 | 0.9 | 0.5 |
| 7848 | 160e05 | BP088692 | MX066f08  |   |   | 12.6  | 11.1  | 12.9  | 1.0 | 0.3 | 0.9 | 0.2 |
| 7849 | 114c04 | AV389205 | CM074g11  |   |   | 28.4  | 12.8  | 13.8  | 0.5 | 0.1 | 0.9 | 0.3 |
| 7850 | 122f11 | AV638706 | HC089g01  |   |   | 79.9  | 46.9  | 50.1  | 0.6 | 0.2 | 0.9 | 0.2 |
| 7851 | 036d11 | BP098256 | MXL090c07 |   |   | 12.2  | 11.0  | 12.3  | 0.9 | 0.2 | 0.9 | 0.3 |
| 7852 | 129f04 | AV642975 | HCL061e03 |   |   | 20.6  | 18.6  | 20.3  | 0.9 | 0.2 | 0.9 | 0.1 |
| 7853 | 172h03 | BP098558 | MXL095d07 |   |   | 5.0   | 5.7   | 8.1   | 1.0 | 0.6 | 0.9 | 0.9 |
| 7854 | 169e01 | BP096983 | MXL068b11 |   |   | 5.8   | 6.3   | 9.6   | 1.1 | 0.1 | 0.9 | 0.7 |
| 7855 | 144f06 | AV626311 | LCL006f09 |   |   | 4.9   | 4.2   | 4.6   | 0.9 | 0.2 | 0.9 | 0.1 |
| 7856 | 128d03 | AV642327 | HCL049g08 |   |   | 33.0  | 37.8  | 43.4  | 1.2 | 0.4 | 0.9 | 0.4 |
| 7857 | 129b07 | AV642702 | HCL056c09 |   |   | 7.3   | 7.7   | 8.4   | 1.1 | 0.1 | 0.9 | 0.1 |
| 7858 | 129h05 | AV643105 | HCL063g10 |   |   | 10.7  | 9.1   | 10.0  | 0.9 | 0.3 | 0.9 | 0.1 |
| 7859 | 118e10 | BP383693 | HC026h03  |   |   | 55.2  | 56.3  | 61.6  | 1.0 | 0.1 | 0.9 | 0.1 |
| 7860 | 023b06 | AV624721 | LC081f11  |   |   | 32.3  | 25.0  | 28.3  | 0.8 | 0.2 | 0.9 | 0.2 |
| 7861 | 159f07 | BP087978 | MX048e03  |   |   | 17.9  | 15.7  | 16.9  | 0.9 | 0.2 | 0.9 | 0.2 |
| 7862 | 156h02 | BP086392 | MX007h02  |   |   | 138.4 | 116.4 | 125.8 | 0.9 | 0.4 | 0.9 | 0.1 |
| 7863 | 027g07 | AV629423 | LCL058e05 |   |   | 4.9   | 4.2   | 4.5   | 0.9 | 0.0 | 0.9 | 0.2 |
| 7864 | 006g05 | AV390436 | CM046b12  |   |   | 6.2   | 5.8   | 6.4   | 0.9 | 0.0 | 0.9 | 0.1 |
| 7865 | 008h09 | AV389820 | CM080a10  |   |   | 4.8   | 4.3   | 4.6   | 0.9 | 0.1 | 0.9 | 0.1 |
| 7866 | 129c10 | AV642789 | HCL057h11 |   |   | 16.5  | 14.8  | 16.2  | 0.9 | 0.1 | 0.9 | 0.2 |
| 7867 | 125g06 | AV640788 | HCL022d10 |   |   | 12.9  | 13.7  | 15.9  | 1.1 | 0.1 | 0.9 | 0.4 |
| 7868 | 154h12 | AV631208 | LCL090c04 |   |   | 13.1  | 9.1   | 12.1  | 0.7 | 0.2 | 0.9 | 0.6 |
| 7869 | 032g05 | BP093605 | MXL010g10 |   |   | 5.8   | 6.1   | 6.9   | 1.1 | 0.2 | 0.9 | 0.2 |
| 7870 | 150a09 | AV628827 | LCL047f08 |   |   | 23.8  | 19.6  | 21.7  | 0.8 | 0.0 | 0.9 | 0.2 |
| 7871 | 149h07 | AV628718 | LCL046b05 |   |   | 16.2  | 12.6  | 13.6  | 0.8 | 0.1 | 0.9 | 0.1 |
| 7872 | 101c07 | AV392490 | CM097a11  |   |   | 45.9  | 50.1  | 54.0  | 1.1 | 0.1 | 0.9 | 0.1 |
| 7873 | 144g04 | AV626359 | LCL007g07 |   |   | 15.5  | 13.0  | 14.0  | 0.8 | 0.1 | 0.9 | 0.0 |
| 7874 | 110c05 | AV389083 | CM034e12  |   |   | 25.0  | 16.4  | 18.2  | 0.7 | 0.1 | 0.9 | 0.3 |
| 7875 | 142h10 | AV625521 | LC094a11  |   |   | 14.4  | 10.6  | 11.5  | 0.7 | 0.1 | 0.9 | 0.1 |
| 7876 | 112d06 | AV391807 | CM056d09  |   |   | 4.2   | 3.1   | 3.4   | 0.8 | 0.3 | 0.9 | 0.1 |
| 7877 | 152h08 | AV630235 | LCL075h02 |   |   | 34.6  | 27.5  | 29.7  | 0.8 | 0.2 | 0.9 | 0.2 |
| 7878 | 120g11 | AV636449 | HC059f07  |   |   | 7.4   | 6.2   | 7.0   | 0.8 | 0.1 | 0.9 | 0.2 |
| 7879 | 146g11 | AV627252 | LCL023g06 |   |   | 15.4  | 22.3  | 24.6  | 1.4 | 0.3 | 0.9 | 0.1 |
| 7880 | 151e05 | AV629542 | LCL060f06 |   |   | 16.6  | 18.5  | 20.9  | 1.1 | 0.3 | 0.9 | 0.4 |
| 7881 | 133f09 | AV645150 | HCL098h01 |   |   | 7.2   | 6.9   | 7.5   | 1.0 | 0.2 | 0.9 | 0.1 |
| 7882 | 101f05 | AV393801 | CL12b03   |   |   | 4.6   | 5.4   | 5.9   | 1.1 | 0.2 | 0.9 | 0.2 |
| 7883 | 010h08 | AV633782 | HC025b10  |   |   | 9.3   | 9.9   | 10.4  | 1.1 | 0.2 | 0.9 | 0.4 |
| 7884 | 125e10 | AV640690 | HCL020g03 |   |   | 21.8  | 28.0  | 33.7  | 1.5 | 0.8 | 0.9 | 0.3 |
| 7885 | 121f11 | AV637415 | HC072h05  |   |   | 10.7  | 8.5   | 9.9   | 0.8 | 0.2 | 0.9 | 0.3 |
| 7886 | 167e01 | BP098876 | MXL100f05 |   |   | 12.4  | 11.7  | 12.8  | 1.0 | 0.3 | 0.9 | 0.1 |
| 7887 | 101c12 | AV393590 | CL05b10   |   |   | 7.2   | 5.4   | 6.7   | 0.7 | 0.2 | 0.9 | 0.5 |
| 7888 | 154f12 | AV631089 | LCL088f01 |   |   | 55.5  | 35.9  | 38.6  | 0.7 | 0.1 | 0.9 | 0.1 |
| 7889 | 007a12 | AV391060 | CM050d09  |   |   | 8.7   | 9.4   | 11.9  | 1.2 | 0.6 | 0.9 | 0.5 |
| 7890 | 017b04 | AV642893 | HCL060a10 |   |   | 8.7   | 6.4   | 6.9   | 0.7 | 0.1 | 0.9 | 0.1 |
| 7891 | 152g08 | AV630128 | LCL073f08 |   |   | 9.1   | 8.0   | 8.4   | 0.9 | 0.3 | 0.9 | 0.3 |
| 7892 | 114f07 | AV389588 | CM079b01  |   |   | 13.9  | 14.5  | 16.1  | 1.0 | 0.1 | 0.9 | 0.1 |
| 7893 | 139g04 | AV623348 | LC062d11  |   |   | 21.7  | 21.4  | 23.2  | 1.0 | 0.1 | 0.9 | 0.1 |
| 7894 | 001g12 | AV394422 | CL24e10   |   |   | 15.7  | 13.8  | 14.9  | 0.9 | 0.2 | 0.9 | 0.2 |
| 7895 | 010c03 | AV632453 | HC008d09  |   |   | 12.9  | 12.6  | 13.9  | 1.0 | 0.2 | 0.9 | 0.2 |
| 7896 | 026e08 | AV628395 | LCL041b04 |   |   | 5.5   | 3.2   | 3.3   | 0.6 | 0.1 | 0.9 | 0.2 |
| 7897 | 102h12 | AV394737 | CL30a03   |   |   | 15.1  | 10.9  | 11.9  | 0.7 | 0.2 | 0.9 | 0.5 |
| 7898 | 155f12 | AV631559 | LCL096b07 |   |   | 30.5  | 29.8  | 32.5  | 1.0 | 0.1 | 0.9 | 0.1 |
| 7899 | 141c08 | AV624389 | LC077b02  |   |   | 8.3   | 7.9   | 8.6   | 1.0 | 0.1 | 0.9 | 0.1 |
| 7900 | 137e12 | AV621722 | LC040b05  |   |   | 9.1   | 6.4   | 7.2   | 0.7 | 0.1 | 0.9 | 0.2 |
| 7901 | 150g07 | AV629147 | LCL053a10 |   |   | 26.5  | 23.4  | 25.5  | 0.9 | 0.2 | 0.9 | 0.1 |
| 7902 | 151a01 | AV629280 | LCL055g11 |   |   | 34.5  | 30.1  | 34.1  | 0.9 | 0.0 | 0.9 | 0.2 |
| 7903 | 164d03 | BP094731 | MXL028d01 |   |   | 7.9   | 6.1   | 7.0   | 0.8 | 0.1 | 0.9 | 0.3 |
| 7904 | 124a09 | AV639950 | HCL007g08 |   |   | 28.2  | 26.5  | 31.0  | 0.9 | 0.1 | 0.9 | 0.3 |
| 7905 | 130d09 | AV643454 | HCL069h10 |   |   | 8.3   | 6.3   | 6.9   | 0.8 | 0.1 | 0.9 | 0.0 |
| 7906 | 113g07 | AV389365 | CM070d04  |   |   | 25.7  | 18.6  | 29.9  | 0.7 | 0.1 | 0.9 | 0.6 |
| 7907 | 123f12 | AV639729 | HCL003h04 |   |   | 5.5   | 5.4   | 5.9   | 1.0 | 0.2 | 0.9 | 0.2 |
| 7908 | 132c05 | AV644620 | HCL091d01 |   |   | 24.1  | 16.9  | 18.5  | 0.7 | 0.1 | 0.9 | 0.1 |
| 7909 | 164d02 | BP094725 | MXL028c04 |   |   | 21.3  | 20.8  | 23.7  | 1.0 | 0.1 | 0.9 | 0.3 |
| 7910 | 020b08 | AV620810 | LC027b07  |   |   | 6.4   | 5.6   | 6.1   | 0.9 | 0.2 | 0.9 | 0.1 |
| 7911 | 167e09 | BP096107 | MXL052g08 |   |   | 6.5   | 7.0   | 8.8   | 1.1 | 0.1 | 0.9 | 0.4 |
| 7912 | 148b06 | AV627853 | LCL032h12 |   |   | 14.8  | 12.2  | 13.6  | 0.9 | 0.2 | 0.9 | 0.2 |
| 7913 | 022e07 | AV623965 | LC071b03  |   |   | 17.7  | 12.1  | 14.9  | 0.8 | 0.3 | 0.9 | 0.4 |
| 7914 | 120h08 | AV636528 | HC060f08  |   |   | 142.9 | 182.5 | 196.4 | 1.3 | 0.1 | 0.9 | 0.1 |
| 7915 | 129f06 | AV642    |           |   |   |       |       |       |     |     |     |     |

|      | A      | B        | C         | D | E | F     | G     | H     | I   | J   | K   | L   |
|------|--------|----------|-----------|---|---|-------|-------|-------|-----|-----|-----|-----|
| 7916 | 154a12 | AV630785 | LCL084c08 |   |   | 22.4  | 14.1  | 19.0  | 0.7 | 0.1 | 0.9 | 0.5 |
| 7917 | 149a10 | AV628333 | LCL040c02 |   |   | 8.0   | 6.9   | 7.7   | 0.9 | 0.1 | 0.9 | 0.1 |
| 7918 | 170g07 | BP097590 | MXL078b08 |   |   | 6.2   | 3.2   | 4.3   | 0.5 | 0.5 | 0.9 | 0.9 |
| 7919 | 145d01 | AV626640 | LCL012g10 |   |   | 31.4  | 22.5  | 25.4  | 0.8 | 0.2 | 0.9 | 0.2 |
| 7920 | 168e12 | BP096591 | MXL061c06 |   |   | 53.6  | 55.6  | 65.0  | 1.1 | 0.1 | 0.9 | 0.3 |
| 7921 | 002c09 | AV395147 | CL36e08   |   |   | 3.6   | 3.8   | 4.3   | 1.0 | 0.2 | 0.9 | 0.3 |
| 7922 | 012c11 | AV636551 | HC061a04  |   |   | 65.4  | 53.7  | 58.6  | 0.8 | 0.1 | 0.9 | 0.1 |
| 7923 | 135g07 | AV620221 | LCO19b12  |   |   | 12.5  | 8.2   | 8.9   | 0.7 | 0.2 | 0.9 | 0.2 |
| 7924 | 157g02 | BP087130 | MX026b10  |   |   | 8.1   | 6.6   | 7.4   | 0.8 | 0.3 | 0.9 | 0.6 |
| 7925 | 028a10 | AV629584 | LCL061e01 |   |   | 2.5   | 1.7   | 1.9   | 0.7 | 0.3 | 0.9 | 0.4 |
| 7926 | 105a09 | AV396283 | CL57b04   |   |   | 24.2  | 21.0  | 23.8  | 0.9 | 0.4 | 0.9 | 0.4 |
| 7927 | 024e06 | AV626635 | LCL012g02 |   |   | 26.7  | 23.3  | 34.7  | 0.9 | 0.4 | 0.9 | 0.7 |
| 7928 | 032d11 | BP093290 | MXL006c03 |   |   | 17.9  | 12.1  | 13.2  | 0.7 | 0.1 | 0.9 | 0.1 |
| 7929 | 145d10 | AV626699 | LCL013h08 |   |   | 6.2   | 5.9   | 6.6   | 1.0 | 0.1 | 0.9 | 0.3 |
| 7930 | 104g12 | AV396158 | CL54e02   |   |   | 4.6   | 3.9   | 4.3   | 0.9 | 0.2 | 0.9 | 0.1 |
| 7931 | 145d09 | AV626696 | LCL013h04 |   |   | 18.0  | 16.6  | 18.7  | 0.9 | 0.1 | 0.9 | 0.2 |
| 7932 | 104h11 | AV396046 | CL55h12   |   |   | 8.8   | 12.6  | 14.7  | 1.4 | 0.1 | 0.9 | 0.2 |
| 7933 | 107b06 | AV386774 | CM007c12  |   |   | 8.3   | 8.0   | 8.7   | 1.0 | 0.1 | 0.9 | 0.2 |
| 7934 | 110f11 | AV389700 | CM039a11  |   |   | 4.8   | 4.9   | 5.3   | 1.0 | 0.1 | 0.9 | 0.2 |
| 7935 | 159d12 | BP087794 | MX043g05  |   |   | 59.3  | 55.8  | 67.0  | 0.9 | 0.2 | 0.9 | 0.5 |
| 7936 | 172f01 | BP098442 | MXL093d02 |   |   | 16.6  | 17.8  | 21.1  | 1.1 | 0.4 | 0.9 | 0.5 |
| 7937 | 161f06 | BP093238 | MXL005d12 |   |   | 24.2  | 24.6  | 27.8  | 1.0 | 0.3 | 0.9 | 0.3 |
| 7938 | 140d10 | AV623832 | LC069c08  |   |   | 5.6   | 5.2   | 5.7   | 0.9 | 0.2 | 0.9 | 0.2 |
| 7939 | 165f01 | BP095268 | MXL039b04 |   |   | 11.7  | 8.8   | 9.7   | 0.8 | 0.2 | 0.9 | 0.2 |
| 7940 | 119c11 | AV634869 | HC039a06  |   |   | 96.0  | 111.1 | 120.6 | 1.2 | 0.2 | 0.9 | 0.1 |
| 7941 | 141h02 | AV624782 | LC082f06  |   |   | 9.1   | 8.3   | 9.0   | 0.9 | 0.1 | 0.9 | 0.2 |
| 7942 | 146c09 | AV627056 | LCL020d07 |   |   | 63.1  | 55.7  | 62.6  | 0.9 | 0.1 | 0.9 | 0.1 |
| 7943 | 105c01 | AV397914 | CL59h07   |   |   | 4.1   | 5.1   | 5.7   | 1.4 | 0.7 | 0.9 | 0.3 |
| 7944 | 128b06 | AV642202 | HCL047d02 |   |   | 16.7  | 18.9  | 20.7  | 1.1 | 0.2 | 0.9 | 0.2 |
| 7945 | 154g07 | AV631134 | LCL089d01 |   |   | 13.9  | 13.0  | 14.7  | 1.0 | 0.2 | 0.9 | 0.2 |
| 7946 | 128b03 | AV642179 | HCL046h12 |   |   | 11.4  | 10.3  | 11.2  | 0.9 | 0.2 | 0.9 | 0.1 |
| 7947 | 109b06 | AV388246 | CM024b09  |   |   | 5.5   | 4.5   | 5.0   | 0.8 | 0.2 | 0.9 | 0.1 |
| 7948 | 147c02 | AV627431 | LCL026f06 |   |   | 13.6  | 12.9  | 14.8  | 1.0 | 0.3 | 0.9 | 0.2 |
| 7949 | 160f03 | BP088842 | MX101g02  |   |   | 43.9  | 56.8  | 61.4  | 1.3 | 0.3 | 0.9 | 0.1 |
| 7950 | 106g03 | AV386604 | CM003a10  |   |   | 11.6  | 7.0   | 7.8   | 0.6 | 0.1 | 0.9 | 0.2 |
| 7951 | 153h09 | AV630720 | LCL083c05 |   |   | 28.0  | 24.1  | 31.9  | 1.0 | 0.4 | 0.9 | 0.5 |
| 7952 | 022f04 | AV624034 | LC072a06  |   |   | 22.7  | 16.7  | 19.4  | 0.8 | 0.2 | 0.9 | 0.3 |
| 7953 | 147g06 | AV627674 | LCL030d04 |   |   | 10.7  | 14.3  | 15.7  | 1.3 | 0.1 | 0.9 | 0.1 |
| 7954 | 172c06 | BP098296 | MXL091a12 |   |   | 10.9  | 10.1  | 11.0  | 0.9 | 0.2 | 0.9 | 0.2 |
| 7955 | 147d06 | AV627526 | LCL028a10 |   |   | 16.0  | 14.2  | 15.5  | 0.9 | 0.1 | 0.9 | 0.0 |
| 7956 | 032e04 | BP093360 | MXL007d02 |   |   | 21.1  | 15.2  | 21.1  | 0.7 | 0.1 | 0.9 | 0.5 |
| 7957 | 117e05 | AV632796 | HC012f11  |   |   | 7.0   | 5.8   | 6.4   | 0.8 | 0.1 | 0.9 | 0.2 |
| 7958 | 107a08 | AV387205 | CM006g11  |   |   | 13.0  | 11.1  | 12.6  | 0.8 | 0.2 | 0.9 | 0.3 |
| 7959 | 125e05 | AV640669 | HCL020c08 |   |   | 10.0  | 8.6   | 9.4   | 0.9 | 0.1 | 0.9 | 0.1 |
| 7960 | 124e01 | AV640151 | HCL011c08 |   |   | 19.5  | 19.7  | 21.5  | 1.1 | 0.5 | 0.9 | 0.3 |
| 7961 | 109e11 | AV387706 | CM027g03  |   |   | 11.5  | 10.3  | 11.2  | 0.9 | 0.1 | 0.9 | 0.1 |
| 7962 | 169d02 | BP096926 | MXL067b11 |   |   | 8.2   | 5.0   | 5.6   | 0.6 | 0.1 | 0.9 | 0.3 |
| 7963 | 103a03 | AV394740 | CL30f03   |   |   | 2.4   | 2.8   | 3.2   | 1.3 | 0.3 | 0.9 | 0.4 |
| 7964 | 010a11 | AV632179 | HC004h12  |   |   | 12.4  | 10.2  | 11.0  | 0.8 | 0.3 | 0.9 | 0.3 |
| 7965 | 028e10 | AV630101 | LCL073b04 |   |   | 6.6   | 5.8   | 6.7   | 0.9 | 0.1 | 0.9 | 0.2 |
| 7966 | 132g02 | AV644810 | HCL094b04 |   |   | 15.8  | 14.5  | 16.2  | 0.9 | 0.1 | 0.9 | 0.2 |
| 7967 | 150c05 | AV628930 | LCL049b05 |   |   | 23.9  | 23.1  | 25.4  | 1.0 | 0.2 | 0.9 | 0.1 |
| 7968 | 019g08 | AV620282 | LC020a07  |   |   | 19.3  | 20.4  | 22.4  | 1.1 | 0.2 | 0.9 | 0.1 |
| 7969 | 146f08 | AV627175 | LCL022c03 |   |   | 15.9  | 13.4  | 14.9  | 0.8 | 0.0 | 0.9 | 0.1 |
| 7970 | 147g07 | AV627675 | LCL030d05 |   |   | 5.8   | 5.2   | 5.9   | 0.9 | 0.0 | 0.9 | 0.2 |
| 7971 | 031e09 | BP087014 | MX022h07  |   |   | 126.4 | 110.0 | 124.5 | 0.9 | 0.1 | 0.9 | 0.3 |
| 7972 | 169h11 | BP097181 | MXL071d05 |   |   | 10.3  | 12.9  | 16.6  | 1.3 | 0.7 | 0.9 | 0.7 |
| 7973 | 019b04 | AV619607 | LCO10f10  |   |   | 57.9  | 37.2  | 42.8  | 0.7 | 0.2 | 0.9 | 0.3 |
| 7974 | 015e09 | AV641197 | HCL029f02 |   |   | 13.3  | 12.8  | 13.8  | 1.0 | 0.4 | 0.9 | 0.2 |
| 7975 | 154g01 | AV631091 | LCL088f03 |   |   | 13.0  | 10.0  | 11.9  | 0.8 | 0.2 | 0.9 | 0.5 |
| 7976 | 146b09 | AV627017 | LCL019h05 |   |   | 19.0  | 14.8  | 16.7  | 0.8 | 0.1 | 0.9 | 0.2 |
| 7977 | 034c04 | BP095532 | MXL043d01 |   |   | 9.2   | 8.0   | 9.5   | 0.9 | 0.2 | 0.9 | 0.3 |
| 7978 | 157f02 | BP087071 | MX024e03  |   |   | 7.5   | 6.6   | 7.4   | 0.9 | 0.1 | 0.9 | 0.2 |
| 7979 | 130g06 | AV643688 | HCL074c01 |   |   | 12.4  | 12.4  | 13.8  | 1.0 | 0.2 | 0.9 | 0.3 |
| 7980 | 017a11 | AV642849 | HCL059c03 |   |   | 17.5  | 11.7  | 21.9  | 0.8 | 0.4 | 0.9 | 0.7 |
| 7981 | 001h09 | AV394681 | CL27a12   |   |   | 3.9   | 3.8   | 4.4   | 1.0 | 0.1 | 0.9 | 0.4 |
| 7982 | 025h09 | AV627917 | LCL033h02 |   |   | 8.3   | 8.2   | 9.2   | 1.0 | 0.2 | 0.9 | 0.2 |
| 7983 | 151a11 | AV629329 | LCL056f11 |   |   | 15.1  | 18.1  | 20.4  | 1.2 | 0.2 | 0.9 | 0.2 |
| 7984 | 160e01 | BP088654 | MX065h07  |   |   | 11.7  | 9.9   | 11.2  | 0.9 | 0.1 | 0.9 | 0.3 |
| 7985 | 137h08 | AV621961 | LC043c02  |   |   | 45.1  | 74.3  | 87.5  | 1.7 | 0.2 | 0.9 | 0.3 |
| 7986 | 107h05 | AV387102 | CM013e08  |   |   | 11.4  | 7.4   | 8.1   | 0.7 | 0.2 | 0.9 | 0.2 |
| 7987 | 157d06 | BP086880 | MX019d10  |   |   | 16.5  | 15.0  | 17.0  | 1.0 | 0.3 | 0.9 | 0.2 |
| 7988 | 123f06 | AV639677 | HCL002h08 |   |   | 7.3   | 5.8   | 6.5   | 0.8 | 0.1 | 0.9 | 0.3 |
| 7989 | 151f09 | AV629623 | LCL062b12 |   |   | 7.5   | 7.6   | 8.4   | 1.0 | 0.2 | 0.9 | 0.1 |
| 7990 | 124f10 | AV640226 | HCL012e06 |   |   | 10.9  | 10.5  | 11.4  | 1.0 | 0.1 | 0.9 | 0.1 |
| 7991 | 155e07 | AV631462 | LCL094e03 |   |   | 10.0  | 9.4   | 10.6  | 1.0 | 0.3 | 0.9 | 0.1 |
| 7992 | 166e01 | BP095651 | MXL045c03 |   |   | 7.3   | 6.8   | 7.8   | 0.9 | 0.2 | 0.9 | 0.6 |
| 7993 | 135a10 | AV619674 | LCO11f03  |   |   | 39.6  | 36.5  | 40.0  | 0.9 | 0.1 | 0.9 | 0.1 |
| 7994 | 017c01 | AV642982 | HCL061f05 |   |   | 12.8  | 15.9  | 19.1  | 1.5 | 0.6 | 0.9 | 0.2 |
| 7995 | 009c08 | AV390850 | CM087h09  |   |   | 9.9   | 6.6   | 7.2   | 0.7 | 0.1 | 0.9 | 0.1 |
| 7996 | 009c05 | AV391135 | CM087d05  |   |   | 15.6  | 21.1  | 23.1  | 1.4 | 0.2 | 0.9 | 0.1 |
| 7997 | 011b08 | AV634392 | HC032g09  |   |   | 9.3   | 8.4   | 9.2   | 0.9 | 0.1 | 0.9 | 0.1 |
| 7998 | 101f08 | AV393810 | CL12h07   |   |   | 6.1   | 5.0   | 5.7   | 0.9 | 0.3 | 0.9 | 0.3 |
| 7999 | 004f11 | AV387113 | CM012e10  |   |   | 61.7  | 61.1  | 67.0  | 1.0 | 0.2 | 0.9 | 0.0 |
| 8000 | 012b11 | AV636304 | HC057g03  |   |   | 6.2   | 5.4   | 6.1   | 0.9 | 0.1 | 0.9 | 0.2 |
| 8001 | 013e07 | AV638816 | HC091b12  |   |   | 8.1   | 7.9   | 8.6   | 1.0 | 0.3 | 0.9 | 0.1 |
| 8002 | 124a05 | AV639942 | HCL007f05 |   |   | 15.6  | 14.0  | 15.5  | 0.9 | 0.1 | 0.9 | 0.1 |
| 8003 | 149h02 | AV628691 | LCL045f09 |   |   | 6.5   | 6.1   | 6.7   | 1.0 | 0.1 | 0.9 | 0.1 |
| 8004 | 010a09 | AV632139 | HC004d09  |   |   | 12.1  | 10.3  | 11.4  | 0.9 | 0.2 | 0.9 | 0.1 |
| 8005 | 030a08 | AV631310 | LCL091h01 |   |   | 5.2   | 4.8   | 5.2   | 1.0 | 0.3 | 0.9 | 0.2 |
| 8006 | 153e12 | AV630552 | LCL080f04 |   |   | 23.9  | 18.3  | 31.0  | 0.8 | 0.1 | 0.9 | 0.6 |
| 8007 | 015g10 | AV641431 | HCL033e03 |   |   | 18.2  | 14.5  | 21.7  | 0.8 | 0.3 | 0.9 | 0.6 |
| 8008 | 015b03 | AV640729 | HCL021d06 |   |   | 5.3   | 4.7   | 5.3   | 0.8 | 0.2 | 0.9 | 0.5 |
| 8009 | 031c10 | BP086747 | MX015h04  |   |   | 11.5  | 17.2  | 19.1  | 1.5 | 0.3 | 0.9 | 0.1 |
| 8010 | 030b07 | AV631442 | LCL094a05 |   |   | 28.7  | 20.2  | 22.8  | 0.7 | 0.1 | 0.9 | 0.2 |
| 8011 | 150a11 | AV628834 | LCL047g04 |   |   | 12.6  | 11.9  | 14.9  | 1.0 | 0.1 | 0.9 | 0.4 |
| 8012 | 171c09 | BP097828 | MXL082a05 |   |   | 31.5  | 28.7  | 36.5  | 1.0 | 0.3 | 0.9 | 0.4 |
| 8013 | 009g10 | AV392734 | CM099h05  |   |   | 3.7   | 4.3   | 4.9   | 1.2 | 0.1 | 0.9 | 0.3 |
| 8014 | 170c08 | BP097339 | MXL074b02 |   |   | 4.6   | 5.2   | 5.8   | 1.2 | 0.6 | 0.9 | 0.3 |
| 8015 | 130g01 | AV643654 | HCL073e05 |   |   | 11.6  | 12.7  | 13.9  | 1.1 | 0.2 | 0.9 | 0.1 |
| 8016 | 153g06 | AV630639 | LCL081h10 |   |   | 15.9  | 11.3  | 12.7  | 0.7 | 0.0 | 0.9 | 0.1 |
| 8017 | 122a11 | AV637834 | HC078b09  |   |   | 7.6   | 7.1   | 7.9   | 0.9 | 0.1 | 0.9 | 0.1 |
| 8018 | 131g12 | AV644318 | HCL086c03 |   |   | 30.9  | 24.4  | 27.5  | 0.8 | 0.1 | 0.9 | 0.2 |
| 8019 | 005d11 | AV388214 | CM024e12  |   |   | 6.4   | 7.7   | 8.8   | 1.2 | 0.4 | 0.9 | 0.3 |
| 8020 | 143g07 | AV625943 | LC100b03  |   |   | 4.5   | 3.3   | 3.9   | 0.7 | 0.0 | 0.9 | 0.3 |
| 8021 | 130d06 | AV643441 | HCL069g03 |   |   | 11.9  | 9.3   | 10.5  | 0.8 | 0.1 | 0.9 | 0.2 |
| 8022 | 013f08 | AV639179 | HC096a03  |   |   |       |       |       |     |     |     |     |

|      | A      | B        | C         | D | E | F     | G     | H     | I   | J   | K   | L   |
|------|--------|----------|-----------|---|---|-------|-------|-------|-----|-----|-----|-----|
| 8023 | 160h10 | BP089428 | MX207b05  |   |   | 3.8   | 4.0   | 5.1   | 1.1 | 0.4 | 0.9 | 0.5 |
| 8024 | 010b08 | AV632331 | HC006h01  |   |   | 9.2   | 13.3  | 13.9  | 1.4 | 0.5 | 0.9 | 0.4 |
| 8025 | 013d08 | AV638660 | HC089b06  |   |   | 6.0   | 7.0   | 8.1   | 1.2 | 0.1 | 0.9 | 0.3 |
| 8026 | 014g12 | AV640472 | HCL016h09 |   |   | 8.1   | 8.5   | 9.7   | 1.0 | 0.3 | 0.9 | 0.4 |
| 8027 | 112i07 | AV392144 | CM058e06  |   |   | 12.1  | 10.2  | 11.4  | 0.9 | 0.1 | 0.9 | 0.1 |
| 8028 | 137h12 | AV621990 | LC043f04  |   |   | 31.7  | 32.3  | 35.4  | 1.0 | 0.0 | 0.9 | 0.1 |
| 8029 | 149g04 | AV628624 | LCL044f09 |   |   | 17.1  | 14.9  | 16.5  | 0.9 | 0.1 | 0.9 | 0.1 |
| 8030 | 032c06 | BP093074 | MXL003a07 |   |   | 11.0  | 8.6   | 9.4   | 0.8 | 0.2 | 0.9 | 0.2 |
| 8031 | 122g12 | AV638955 | HC093a11  |   |   | 183.6 | 193.3 | 213.7 | 1.1 | 0.2 | 0.9 | 0.1 |
| 8032 | 150d02 | AV628956 | LCL049e07 |   |   | 17.6  | 13.2  | 15.8  | 0.8 | 0.0 | 0.9 | 0.4 |
| 8033 | 140f09 | AV623991 | LC071d12  |   |   | 16.0  | 13.8  | 15.7  | 0.9 | 0.1 | 0.9 | 0.2 |
| 8034 | 002b10 | AV394949 | CL33d09   |   |   | 6.0   | 4.5   | 5.1   | 0.8 | 0.4 | 0.9 | 0.4 |
| 8035 | 153i07 | AV630580 | LCL081a09 |   |   | 5.5   | 4.9   | 5.4   | 0.9 | 0.1 | 0.9 | 0.1 |
| 8036 | 155d04 | AV631396 | LCL093c01 |   |   | 16.2  | 8.1   | 9.8   | 0.5 | 0.0 | 0.9 | 0.5 |
| 8037 | 124f07 | AV640212 | HCL012c05 |   |   | 9.5   | 7.3   | 8.1   | 0.8 | 0.1 | 0.9 | 0.1 |
| 8038 | 137d10 | AV621579 | LC038a07  |   |   | 8.8   | 8.7   | 9.8   | 1.0 | 0.3 | 0.9 | 0.2 |
| 8039 | 162f09 | BP093872 | MXL015a02 |   |   | 17.0  | 15.5  | 18.9  | 0.9 | 0.1 | 0.9 | 0.3 |
| 8040 | 141c10 | AV624405 | LC077c11  |   |   | 8.3   | 7.6   | 8.3   | 0.9 | 0.2 | 0.9 | 0.2 |
| 8041 | 027d12 | AV629204 | LCL054d03 |   |   | 3.4   | 3.4   | 3.7   | 1.0 | 0.4 | 0.9 | 0.3 |
| 8042 | 118f02 | AV633968 | HC027e06  |   |   | 7.7   | 8.5   | 9.7   | 1.1 | 0.1 | 0.9 | 0.1 |
| 8043 | 143b09 | AV625623 | LC095f01  |   |   | 23.2  | 19.1  | 22.5  | 0.9 | 0.2 | 0.9 | 0.3 |
| 8044 | 014d06 | AV639999 | HCL008e07 |   |   | 4.9   | 3.4   | 4.2   | 0.7 | 0.2 | 0.9 | 0.5 |
| 8045 | 166f03 | BP095719 | MXL046d03 |   |   | 8.1   | 8.8   | 10.8  | 1.1 | 0.1 | 0.9 | 0.4 |
| 8046 | 011h10 | AV635724 | HC050b02  |   |   | 14.9  | 16.9  | 18.3  | 1.1 | 0.1 | 0.9 | 0.1 |
| 8047 | 116c07 | AV392230 | CM098c02  |   |   | 20.0  | 21.4  | 23.6  | 1.1 | 0.1 | 0.9 | 0.1 |
| 8048 | 118g03 | AV634117 | HC029e03  |   |   | 9.5   | 7.0   | 7.8   | 0.7 | 0.1 | 0.9 | 0.1 |
| 8049 | 036b09 | BP097895 | MXL083a11 |   |   | 18.5  | 8.7   | 11.6  | 0.5 | 0.2 | 0.9 | 0.6 |
| 8050 | 116a03 | BP098664 | MXL097b02 |   |   | 7.7   | 10.4  | 13.4  | 1.4 | 0.2 | 0.9 | 0.6 |
| 8051 | 128e08 | AV642432 | HCL051f05 |   |   | 21.4  | 26.8  | 29.3  | 1.2 | 0.2 | 0.9 | 0.1 |
| 8052 | 156f12 | BP086290 | MX005h09  |   |   | 252.7 | 261.9 | 290.8 | 1.1 | 0.1 | 0.9 | 0.2 |
| 8053 | 125e02 | AV640640 | HCL019f06 |   |   | 10.8  | 9.6   | 10.9  | 0.9 | 0.2 | 0.9 | 0.2 |
| 8054 | 159d02 | BP087772 | MX043c08  |   |   | 4.5   | 4.0   | 4.4   | 0.9 | 0.1 | 0.9 | 0.3 |
| 8055 | 132g10 | AV644826 | HCL094c10 |   |   | 18.2  | 14.9  | 16.4  | 0.8 | 0.1 | 0.9 | 0.2 |
| 8056 | 152d02 | AV629934 | LCL069d04 |   |   | 37.9  | 38.9  | 42.4  | 1.1 | 0.1 | 0.9 | 0.1 |
| 8057 | 033d12 | BP094394 | MXL022e02 |   |   | 22.7  | 29.8  | 33.3  | 1.3 | 0.2 | 0.9 | 0.1 |
| 8058 | 154d01 | AV630928 | LCL086d11 |   |   | 25.5  | 21.5  | 27.9  | 0.8 | 0.1 | 0.9 | 0.4 |
| 8059 | 167g11 | BP096205 | MXL054f01 |   |   | 12.1  | 18.9  | 19.9  | 1.5 | 0.2 | 0.9 | 0.3 |
| 8060 | 117h12 | AV633293 | HC019a10  |   |   | 3.5   | 3.1   | 3.8   | 0.9 | 0.3 | 0.9 | 0.4 |
| 8061 | 131h07 | AV644361 | HCL087a11 |   |   | 17.1  | 17.7  | 22.9  | 1.1 | 0.2 | 0.9 | 0.4 |
| 8062 | 142g12 | AV625449 | LC092g03  |   |   | 8.8   | 8.5   | 9.3   | 1.0 | 0.1 | 0.9 | 0.2 |
| 8063 | 030d07 | AV631655 | LCL097f10 |   |   | 6.7   | 4.7   | 5.6   | 0.7 | 0.0 | 0.9 | 0.4 |
| 8064 | 162e09 | BP093812 | MXL014b06 |   |   | 8.9   | 7.7   | 8.6   | 0.9 | 0.2 | 0.9 | 0.1 |
| 8065 | 024a02 | AV626262 | LCL005d09 |   |   | 17.1  | 9.9   | 11.1  | 0.6 | 0.1 | 0.9 | 0.1 |
| 8066 | 114c07 | AV389222 | CM074h08  |   |   | 11.8  | 9.8   | 10.8  | 0.8 | 0.1 | 0.9 | 0.1 |
| 8067 | 159e05 | BP087808 | MX044a03  |   |   | 7.2   | 7.8   | 9.1   | 1.1 | 0.3 | 0.9 | 0.3 |
| 8068 | 153d09 | AV630480 | LCL079e03 |   |   | 22.1  | 18.8  | 21.6  | 0.9 | 0.2 | 0.9 | 0.2 |
| 8069 | 142d06 | AV625162 | LC088f10  |   |   | 12.3  | 9.4   | 10.1  | 0.8 | 0.2 | 0.9 | 0.2 |
| 8070 | 137h09 | AV621969 | LC043d01  |   |   | 7.0   | 6.2   | 6.9   | 0.9 | 0.0 | 0.9 | 0.1 |
| 8071 | 104a07 | AV395542 | CL43h05   |   |   | 103.2 | 117.5 | 131.6 | 1.2 | 0.2 | 0.9 | 0.1 |
| 8072 | 125e03 | AV640644 | HCL019g03 |   |   | 5.8   | 4.9   | 5.6   | 0.9 | 0.1 | 0.9 | 0.2 |
| 8073 | 144f03 | AV626306 | LCL006e07 |   |   | 16.8  | 13.9  | 15.6  | 0.8 | 0.1 | 0.9 | 0.1 |
| 8074 | 159h07 | BP088183 | MX053e05  |   |   | 4.3   | 4.9   | 6.8   | 1.2 | 0.7 | 0.9 | 0.7 |
| 8075 | 142b04 | AV624951 | LC084h12  |   |   | 14.3  | 15.1  | 17.9  | 1.0 | 0.2 | 0.9 | 0.4 |
| 8076 | 110c06 | AV389091 | CM034g07  |   |   | 25.2  | 20.5  | 26.4  | 0.8 | 0.1 | 0.9 | 0.3 |
| 8077 | 146f02 | AV627162 | LCL022a10 |   |   | 32.6  | 28.4  | 31.2  | 0.9 | 0.1 | 0.9 | 0.1 |
| 8078 | 147d03 | AV627509 | LCL027g10 |   |   | 14.5  | 22.4  | 25.6  | 1.5 | 0.1 | 0.9 | 0.2 |
| 8079 | 162h01 | BP093959 | MXL016c05 |   |   | 5.3   | 5.1   | 8.5   | 0.9 | 0.5 | 0.9 | 0.8 |
| 8080 | 117h04 | AV633209 | HC018a10  |   |   | 6.2   | 6.1   | 6.6   | 1.0 | 0.1 | 0.9 | 0.1 |
| 8081 | 029h04 | AV631173 | LCL089h01 |   |   | 16.0  | 13.8  | 19.8  | 0.9 | 0.2 | 0.9 | 0.5 |
| 8082 | 148d07 | AV628003 | LCL035b10 |   |   | 40.6  | 33.9  | 39.0  | 0.9 | 0.2 | 0.9 | 0.2 |
| 8083 | 148e09 | AV628076 | LCL036c12 |   |   | 18.3  | 19.7  | 21.7  | 1.1 | 0.1 | 0.9 | 0.1 |
| 8084 | 121h10 | AV637684 | HC076c01  |   |   | 9.9   | 9.6   | 10.7  | 1.0 | 0.1 | 0.9 | 0.3 |
| 8085 | 144h06 | AV626425 | LCL008h01 |   |   | 26.5  | 20.6  | 22.7  | 0.8 | 0.0 | 0.9 | 0.0 |
| 8086 | 139d10 | AV623087 | LC058g04  |   |   | 4.2   | 4.4   | 4.9   | 1.1 | 0.1 | 0.9 | 0.1 |
| 8087 | 148g05 | AV628164 | LCL037g01 |   |   | 9.6   | 7.1   | 7.9   | 0.7 | 0.1 | 0.9 | 0.2 |
| 8088 | 135e09 | AV620038 | LC016g02  |   |   | 16.1  | 13.6  | 15.3  | 0.8 | 0.1 | 0.9 | 0.2 |
| 8089 | 010g11 | AV633586 | HC022f04  |   |   | 14.0  | 17.2  | 20.8  | 1.2 | 0.3 | 0.9 | 0.4 |
| 8090 | 026a08 | AV628020 | LCL035e03 |   |   | 22.7  | 17.8  | 25.1  | 0.8 | 0.1 | 0.9 | 0.5 |
| 8091 | 126f02 | AV641360 | HCL032c06 |   |   | 21.1  | 19.7  | 23.3  | 0.9 | 0.1 | 0.9 | 0.3 |
| 8092 | 032b02 | BP092961 | MXL001d12 |   |   | 30.6  | 12.5  | 16.2  | 0.5 | 0.2 | 0.9 | 0.5 |
| 8093 | 029d10 | AV630837 | LCL085a02 |   |   | 47.5  | 44.1  | 69.0  | 1.0 | 0.2 | 0.9 | 0.6 |
| 8094 | 168d08 | BP096494 | MXL059f06 |   |   | 13.5  | 13.3  | 14.7  | 1.0 | 0.1 | 0.9 | 0.1 |
| 8095 | 142g09 | AV625440 | LC092f01  |   |   | 5.8   | 5.1   | 5.8   | 0.9 | 0.3 | 0.9 | 0.3 |
| 8096 | 142c09 | AV625055 | LC087c01  |   |   | 7.8   | 6.9   | 7.8   | 0.9 | 0.3 | 0.9 | 0.2 |
| 8097 | 145b01 | AV626508 | LCL010c11 |   |   | 7.6   | 10.4  | 11.6  | 1.4 | 0.2 | 0.9 | 0.1 |
| 8098 | 169f08 | BP097072 | MXL069e12 |   |   | 8.7   | 6.4   | 7.4   | 0.7 | 0.2 | 0.9 | 0.3 |
| 8099 | 028a07 | AV629573 | LCL061c04 |   |   | 4.2   | 2.6   | 3.8   | 0.6 | 0.1 | 0.9 | 0.5 |
| 8100 | 160d02 | BP088563 | MX063e01  |   |   | 4.9   | 5.5   | 6.1   | 1.1 | 0.1 | 0.9 | 0.1 |
| 8101 | 129c06 | AV642774 | HCL057f11 |   |   | 20.9  | 22.4  | 26.2  | 1.1 | 0.3 | 0.9 | 0.3 |
| 8102 | 114c01 | AV388925 | CM074b08  |   |   | 53.9  | 89.2  | 100.6 | 1.7 | 0.1 | 0.9 | 0.1 |
| 8103 | 030c07 | AV631518 | LCL095d12 |   |   | 8.9   | 13.1  | 14.6  | 1.5 | 0.3 | 0.9 | 0.2 |
| 8104 | 003g10 | AV397079 | CL75e06   |   |   | 4.1   | 4.4   | 5.3   | 1.1 | 0.1 | 0.9 | 0.4 |
| 8105 | 031f09 | BP087240 | MX028g06  |   |   | 9.0   | 7.3   | 8.2   | 0.8 | 0.1 | 0.9 | 0.2 |
| 8106 | 147c04 | AV627440 | LCL026g09 |   |   | 7.0   | 6.5   | 7.2   | 1.0 | 0.2 | 0.9 | 0.2 |
| 8107 | 009g11 | AV392748 | CM099h08  |   |   | 11.6  | 7.9   | 8.9   | 0.7 | 0.3 | 0.9 | 0.2 |
| 8108 | 152f11 | AV630076 | LCL072e10 |   |   | 8.4   | 8.3   | 9.6   | 1.0 | 0.0 | 0.9 | 0.2 |
| 8109 | 131e06 | AV644166 | HCL083c01 |   |   | 18.9  | 22.0  | 26.1  | 1.2 | 0.3 | 0.9 | 0.4 |
| 8110 | 113c05 | AV392888 | CM065b05  |   |   | 19.2  | 10.4  | 11.7  | 0.6 | 0.2 | 0.9 | 0.1 |
| 8111 | 122a08 | AV637822 | HC078a02  |   |   | 5.3   | 4.4   | 5.1   | 0.9 | 0.3 | 0.9 | 0.3 |
| 8112 | 018d07 | AV644512 | HCL089g09 |   |   | 22.1  | 20.7  | 23.8  | 0.9 | 0.1 | 0.9 | 0.1 |
| 8113 | 161f01 | BP093221 | MXL005c01 |   |   | 16.0  | 15.7  | 18.7  | 1.0 | 0.2 | 0.9 | 0.4 |
| 8114 | 010b03 | AV632214 | HC005d04  |   |   | 7.8   | 6.3   | 6.8   | 0.8 | 0.1 | 0.9 | 0.2 |
| 8115 | 156f07 | BP086261 | MX005c05  |   |   | 6.2   | 7.6   | 9.0   | 1.2 | 0.1 | 0.9 | 0.3 |
| 8116 | 008g07 | AV389474 | CM076a08  |   |   | 9.8   | 10.1  | 11.1  | 1.1 | 0.2 | 0.9 | 0.1 |
| 8117 | 120g04 | AV636389 | HC058h03  |   |   | 3.7   | 3.4   | 3.8   | 0.9 | 0.2 | 0.9 | 0.2 |
| 8118 | 105a10 | AV396287 | CL57b05   |   |   | 8.6   | 8.8   | 11.0  | 1.1 | 0.1 | 0.9 | 0.4 |
| 8119 | 026a09 | AV628047 | LCL035h10 |   |   | 43.4  | 33.0  | 46.1  | 0.8 | 0.0 | 0.9 | 0.4 |
| 8120 | 016b11 | AV641824 | HCL040h08 |   |   | 8.5   | 8.0   | 9.7   | 1.0 | 0.3 | 0.9 | 0.4 |
| 8121 | 102c06 | AV394329 | CL20e04   |   |   | 15.6  | 13.8  | 15.5  | 0.9 | 0.5 | 0.9 | 0.3 |
| 8122 | 127f06 | AV641932 | HCL042f04 |   |   | 6.1   | 5.1   | 5.7   | 0.8 | 0.1 | 0.9 | 0.1 |
| 8123 | 102c08 | AV394330 | CL20f04   |   |   | 7.6   | 5.8   | 6.5   | 0.8 | 0.1 | 0.9 | 0.1 |
| 8124 | 133d04 | AV645041 | HCL097d02 |   |   | 21.7  | 26.4  | 29.5  | 1.2 | 0.4 | 0.9 | 0.2 |
| 8125 | 141h05 | AV624796 | LC082h05  |   |   | 7.3   | 5.3   | 6.0   | 0.8 | 0.4 | 0.9 | 0.2 |
| 8126 | 144g06 | AV626366 | LCL007h09 |   |   | 24.1  | 20.8  | 23.3  | 0.9 | 0.1 | 0.9 | 0.0 |
| 8127 | 034a06 | BP095178 | MXL037c02 |   |   | 14.2  | 14.4  | 16.5  | 1.0 | 0.1 | 0.9 | 0.2 |
| 8128 | 127a04 | AV641606 | HCL037c06 |   |   | 4.0   | 3.2   | 3.5   | 0.8 | 0.1 | 0.9 | 0.2 |
| 8129 | 114f02 | AV388595 | CM078e08  |   |   |       |       |       |     |     |     |     |



|      | A      | B        | C         | D | E | F     | G     | H     | I   | J   | K   | L   |
|------|--------|----------|-----------|---|---|-------|-------|-------|-----|-----|-----|-----|
| 8130 | 126c09 | AV641172 | HCL029b02 |   |   | 13.0  | 10.9  | 12.2  | 0.9 | 0.1 | 0.9 | 0.1 |
| 8131 | 170d04 | BP097404 | MXL075b08 |   |   | 10.6  | 14.5  | 16.2  | 1.4 | 0.1 | 0.9 | 0.1 |
| 8132 | 135e07 | AV620020 | LCL016d08 |   |   | 13.6  | 11.5  | 12.9  | 0.8 | 0.1 | 0.9 | 0.2 |
| 8133 | 150f06 | AV629096 | LCL051h12 |   |   | 29.2  | 27.1  | 30.7  | 0.9 | 0.0 | 0.9 | 0.1 |
| 8134 | 150f04 | AV629088 | LCL051g11 |   |   | 12.6  | 11.1  | 12.5  | 1.0 | 0.3 | 0.9 | 0.1 |
| 8135 | 014h10 | AV640549 | HCL018b07 |   |   | 4.1   | 4.4   | 5.0   | 1.1 | 0.1 | 0.9 | 0.2 |
| 8136 | 145g02 | AV626825 | LCL016b01 |   |   | 26.6  | 21.2  | 23.6  | 0.8 | 0.1 | 0.9 | 0.1 |
| 8137 | 027f04 | AV629308 | LCL056c10 |   |   | 9.1   | 7.6   | 8.5   | 0.8 | 0.1 | 0.9 | 0.2 |
| 8138 | 127g08 | AV642001 | HCL043f11 |   |   | 15.0  | 14.7  | 16.2  | 1.0 | 0.1 | 0.9 | 0.1 |
| 8139 | 147b05 | AV627396 | LCL026b08 |   |   | 26.1  | 23.3  | 26.1  | 0.9 | 0.2 | 0.9 | 0.1 |
| 8140 | 143b10 | BP098794 | MXL099c06 |   |   | 13.2  | 11.7  | 13.1  | 0.9 | 0.3 | 0.9 | 0.2 |
| 8141 | 005d06 | AV387760 | CM023h10  |   |   | 8.0   | 9.0   | 10.1  | 1.2 | 0.2 | 0.9 | 0.1 |
| 8142 | 009f07 | AV392405 | CM096f01  |   |   | 19.6  | 14.7  | 16.7  | 0.8 | 0.1 | 0.9 | 0.1 |
| 8143 | 144c07 | AV626209 | LCL004c10 |   |   | 22.2  | 19.7  | 23.9  | 0.9 | 0.2 | 0.9 | 0.3 |
| 8144 | 136a10 | AV620448 | LC022c09  |   |   | 27.4  | 28.7  | 31.9  | 1.0 | 0.1 | 0.9 | 0.0 |
| 8145 | 012g05 | AV637332 | HC071g06  |   |   | 35.8  | 34.2  | 37.9  | 1.0 | 0.1 | 0.9 | 0.2 |
| 8146 | 034c06 | BP095545 | MXL043f04 |   |   | 3.4   | 2.5   | 2.8   | 0.8 | 0.2 | 0.9 | 0.2 |
| 8147 | 163g04 | BP094473 | MXL023f04 |   |   | 10.5  | 8.3   | 9.1   | 0.8 | 0.3 | 0.9 | 0.3 |
| 8148 | 146h06 | AV627280 | LCL024c11 |   |   | 53.2  | 79.1  | 95.5  | 1.5 | 0.1 | 0.9 | 0.3 |
| 8149 | 150a07 | AV628799 | LCL047c07 |   |   | 7.5   | 6.7   | 7.5   | 0.9 | 0.2 | 0.9 | 0.1 |
| 8150 | 035e10 | BP097120 | MXL070d12 |   |   | 171.9 | 82.4  | 89.7  | 0.5 | 0.2 | 0.9 | 0.4 |
| 8151 | 004c10 | AV386867 | CM005g02  |   |   | 16.9  | 14.6  | 17.3  | 0.9 | 0.1 | 0.9 | 0.3 |
| 8152 | 141d12 | AV624494 | LC078e04  |   |   | 20.2  | 39.3  | 43.6  | 2.0 | 0.5 | 0.9 | 0.1 |
| 8153 | 102d12 | AV394239 | CL22f01   |   |   | 6.9   | 5.8   | 7.0   | 0.9 | 0.1 | 0.9 | 0.3 |
| 8154 | 007g11 | AV392371 | CM061c01  |   |   | 13.5  | 16.6  | 18.5  | 1.2 | 0.2 | 0.9 | 0.2 |
| 8155 | 013c09 | AV638435 | HC086d02  |   |   | 8.3   | 10.1  | 11.3  | 1.2 | 0.4 | 0.9 | 0.3 |
| 8156 | 118f06 | AV634026 | HC028c08  |   |   | 12.4  | 8.3   | 9.4   | 0.7 | 0.1 | 0.9 | 0.2 |
| 8157 | 126b01 | AV641027 | HCL026d12 |   |   | 10.2  | 10.0  | 11.2  | 1.0 | 0.1 | 0.9 | 0.1 |
| 8158 | 166d08 | BP095626 | MXL044g11 |   |   | 18.4  | 19.1  | 22.1  | 1.1 | 0.1 | 0.9 | 0.2 |
| 8159 | 142e01 | AV625181 | LC089a01  |   |   | 10.5  | 8.6   | 10.8  | 0.8 | 0.1 | 0.9 | 0.3 |
| 8160 | 143c10 | AV625667 | LC096b12  |   |   | 11.0  | 8.2   | 9.4   | 0.7 | 0.0 | 0.9 | 0.2 |
| 8161 | 017a05 | AV626524 | LCL010f02 |   |   | 8.9   | 8.4   | 9.4   | 1.0 | 0.2 | 0.9 | 0.2 |
| 8162 | 156d07 | BP086092 | MX001g08  |   |   | 14.8  | 13.0  | 14.6  | 0.9 | 0.1 | 0.9 | 0.1 |
| 8163 | 002h07 | AV395898 | CL51e06   |   |   | 7.6   | 7.6   | 8.5   | 1.0 | 0.2 | 0.9 | 0.1 |
| 8164 | 172f12 | BP098500 | MXL094c09 |   |   | 26.0  | 13.4  | 15.4  | 0.5 | 0.0 | 0.9 | 0.2 |
| 8165 | 104g11 | AV396136 | CL54d04   |   |   | 57.9  | 54.8  | 61.5  | 1.0 | 0.3 | 0.9 | 0.1 |
| 8166 | 150h08 | AV629265 | LCL055f01 |   |   | 8.6   | 6.1   | 6.9   | 0.8 | 0.3 | 0.9 | 0.1 |
| 8167 | 147g10 | AV627693 | LCL030f07 |   |   | 5.7   | 5.0   | 5.6   | 0.9 | 0.1 | 0.9 | 0.1 |
| 8168 | 154e01 | AV630973 | LCL087a12 |   |   | 29.4  | 21.6  | 26.5  | 0.7 | 0.1 | 0.9 | 0.4 |
| 8169 | 019d05 | AV619865 | LC013h02  |   |   | 328.8 | 328.7 | 378.5 | 1.0 | 0.1 | 0.9 | 0.3 |
| 8170 | 126g11 | AV641487 | HCL034e09 |   |   | 38.9  | 28.1  | 33.1  | 0.7 | 0.1 | 0.9 | 0.3 |
| 8171 | 016c05 | AV641878 | HCL041g07 |   |   | 20.9  | 26.2  | 29.8  | 1.3 | 0.1 | 0.9 | 0.1 |
| 8172 | 171d02 | BP097872 | MXL082g01 |   |   | 10.5  | 8.1   | 9.2   | 0.8 | 0.3 | 0.9 | 0.4 |
| 8173 | 133b07 | BP383768 | HCL096d07 |   |   | 12.6  | 10.4  | 12.2  | 0.9 | 0.2 | 0.9 | 0.3 |
| 8174 | 014f04 | AV640217 | HCL012c12 |   |   | 11.3  | 9.3   | 12.2  | 0.8 | 0.1 | 0.9 | 0.4 |
| 8175 | 149e04 | AV628518 | LCL043b05 |   |   | 11.7  | 9.6   | 11.0  | 0.8 | 0.1 | 0.9 | 0.2 |
| 8176 | 124f04 | AV640208 | HCL012b09 |   |   | 21.7  | 19.6  | 22.1  | 0.9 | 0.1 | 0.9 | 0.0 |
| 8177 | 023h03 | AV626176 | LCL003f07 |   |   | 27.4  | 23.2  | 31.0  | 0.9 | 0.3 | 0.9 | 0.4 |
| 8178 | 126c12 | AV641199 | HCL029f05 |   |   | 14.5  | 12.9  | 15.1  | 0.9 | 0.1 | 0.9 | 0.3 |
| 8179 | 034c09 | BP095638 | MXL045a09 |   |   | 6.0   | 4.9   | 5.8   | 0.8 | 0.1 | 0.9 | 0.3 |
| 8180 | 146b02 | AV626995 | LCL019e06 |   |   | 24.3  | 19.3  | 23.4  | 0.8 | 0.1 | 0.9 | 0.3 |
| 8181 | 106b12 | AV397131 | CL76a09   |   |   | 10.1  | 10.2  | 12.5  | 1.1 | 0.3 | 0.9 | 0.6 |
| 8182 | 033a03 | BP093856 | MXL014g07 |   |   | 10.2  | 6.9   | 7.9   | 0.7 | 0.2 | 0.9 | 0.2 |
| 8183 | 036c09 | BP098060 | MXL086c05 |   |   | 14.5  | 15.1  | 16.9  | 1.0 | 0.1 | 0.9 | 0.1 |
| 8184 | 114g07 | AV390567 | CM080f04  |   |   | 4.0   | 4.0   | 4.5   | 1.0 | 0.2 | 0.9 | 0.1 |
| 8185 | 140g04 | AV624058 | LC072d02  |   |   | 37.4  | 30.5  | 33.9  | 0.8 | 0.1 | 0.9 | 0.2 |
| 8186 | 036a04 | BP097613 | MXL078e05 |   |   | 13.1  | 8.9   | 12.7  | 0.7 | 0.1 | 0.9 | 0.5 |
| 8187 | 129b11 | AV642724 | HCL056g03 |   |   | 23.1  | 22.5  | 25.9  | 1.0 | 0.0 | 0.9 | 0.2 |
| 8188 | 129g12 | AV643055 | HCL062h12 |   |   | 12.2  | 10.5  | 14.1  | 0.9 | 0.1 | 0.9 | 0.5 |
| 8189 | 007e06 | AV391836 | CM056g08  |   |   | 25.5  | 24.9  | 27.9  | 1.0 | 0.1 | 0.9 | 0.1 |
| 8190 | 129g04 | BP383738 | HCL062a08 |   |   | 14.1  | 11.8  | 13.4  | 0.9 | 0.1 | 0.9 | 0.2 |
| 8191 | 017d11 | AV643236 | HCL066b05 |   |   | 3.1   | 3.3   | 3.9   | 1.1 | 0.3 | 0.9 | 0.4 |
| 8192 | 128c02 | AV642245 | HCL048c05 |   |   | 5.4   | 5.2   | 5.8   | 1.0 | 0.3 | 0.9 | 0.2 |
| 8193 | 117f07 | AV632972 | HC015a09  |   |   | 190.5 | 208.1 | 238.6 | 1.1 | 0.2 | 0.9 | 0.2 |
| 8194 | 030h01 | BP086210 | MX004b05  |   |   | 18.7  | 13.4  | 15.1  | 0.7 | 0.1 | 0.9 | 0.1 |
| 8195 | 006e02 | AV390018 | CM041e02  |   |   | 9.0   | 9.0   | 10.9  | 1.1 | 0.4 | 0.9 | 0.4 |
| 8196 | 117f06 | AV632927 | HC014e01  |   |   | 49.4  | 37.2  | 40.3  | 0.8 | 0.3 | 0.9 | 0.2 |
| 8197 | 112g11 | AV392318 | CM060h04  |   |   | 18.8  | 16.3  | 18.6  | 0.9 | 0.2 | 0.9 | 0.2 |
| 8198 | 154f11 | AV631086 | LCL088e10 |   |   | 42.4  | 38.8  | 43.8  | 0.9 | 0.2 | 0.9 | 0.1 |
| 8199 | 121c08 | AV637005 | HC067c09  |   |   | 11.8  | 11.1  | 12.4  | 0.9 | 0.2 | 0.9 | 0.2 |
| 8200 | 133b04 | AV644975 | HCL096c05 |   |   | 9.6   | 8.2   | 9.2   | 0.9 | 0.1 | 0.9 | 0.1 |
| 8201 | 165h03 | BP095372 | MXL040g07 |   |   | 7.1   | 7.1   | 9.0   | 1.1 | 0.2 | 0.9 | 0.4 |
| 8202 | 105e10 | AV396604 | CL65f11   |   |   | 3.8   | 3.0   | 3.5   | 0.8 | 0.0 | 0.9 | 0.2 |
| 8203 | 140c01 | AV623690 | LC067d01  |   |   | 6.7   | 8.7   | 9.4   | 1.3 | 0.6 | 0.9 | 0.2 |
| 8204 | 131a05 | AV643805 | HCL076d04 |   |   | 13.5  | 11.1  | 12.5  | 0.8 | 0.1 | 0.9 | 0.3 |
| 8205 | 118a04 | AV633337 | HC019f06  |   |   | 63.7  | 66.7  | 75.9  | 1.1 | 0.1 | 0.9 | 0.1 |
| 8206 | 132d09 | BP383759 | HCL092c12 |   |   | 9.4   | 7.8   | 8.9   | 0.8 | 0.2 | 0.9 | 0.2 |
| 8207 | 127h06 | AV642049 | HCL044e10 |   |   | 21.2  | 18.8  | 23.9  | 0.9 | 0.0 | 0.9 | 0.4 |
| 8208 | 157d08 | BP086888 | MX019f02  |   |   | 7.5   | 8.1   | 10.4  | 1.1 | 0.3 | 0.9 | 0.4 |
| 8209 | 150a10 | AV628828 | LCL047f09 |   |   | 71.1  | 71.2  | 81.8  | 1.0 | 0.1 | 0.9 | 0.1 |
| 8210 | 169d12 | BP096982 | MXL068b09 |   |   | 5.6   | 4.8   | 5.4   | 0.9 | 0.1 | 0.9 | 0.1 |
| 8211 | 137e06 | AV621670 | LC039d07  |   |   | 8.8   | 8.2   | 9.5   | 0.9 | 0.2 | 0.9 | 0.3 |
| 8212 | 147b07 | AV627412 | LCL026d02 |   |   | 15.9  | 13.0  | 15.5  | 0.8 | 0.1 | 0.9 | 0.3 |
| 8213 | 103d10 | AV395129 | CL36d05   |   |   | 12.1  | 6.8   | 7.8   | 0.6 | 0.2 | 0.9 | 0.3 |
| 8214 | 024e04 | AV626628 | LCL012e10 |   |   | 37.2  | 29.6  | 37.0  | 0.8 | 0.1 | 0.9 | 0.3 |
| 8215 | 108h02 | AV387832 | CM022c04  |   |   | 66.4  | 78.9  | 86.1  | 1.2 | 0.6 | 0.9 | 0.2 |
| 8216 | 014c04 | AV639871 | HCL006e01 |   |   | 10.0  | 10.5  | 13.0  | 1.1 | 0.2 | 0.9 | 0.4 |
| 8217 | 130d03 | BP383744 | HCL069d01 |   |   | 12.5  | 11.3  | 12.8  | 0.9 | 0.1 | 0.9 | 0.2 |
| 8218 | 111g08 | AV391140 | CM051c02  |   |   | 11.1  | 9.3   | 10.8  | 0.8 | 0.1 | 0.9 | 0.3 |
| 8219 | 004a03 | AV386530 | CM001d09  |   |   | 111.1 | 110.5 | 123.1 | 1.0 | 0.2 | 0.9 | 0.1 |
| 8220 | 105d01 | AV396326 | CL61g06   |   |   | 6.5   | 10.7  | 12.1  | 1.6 | 0.3 | 0.9 | 0.2 |
| 8221 | 144d09 | AV626249 | LCL005b03 |   |   | 29.3  | 23.0  | 26.2  | 0.8 | 0.1 | 0.9 | 0.2 |
| 8222 | 119g08 | AV635370 | HC045e06  |   |   | 23.4  | 22.0  | 24.8  | 1.0 | 0.4 | 0.9 | 0.1 |
| 8223 | 124a08 | AV639949 | HCL007g07 |   |   | 9.3   | 8.8   | 9.9   | 1.0 | 0.1 | 0.9 | 0.1 |
| 8224 | 104a11 | AV395619 | CL44d04   |   |   | 4.6   | 5.9   | 7.3   | 1.4 | 0.3 | 0.9 | 0.5 |
| 8225 | 008a11 | AV392809 | CM064c11  |   |   | 6.1   | 4.8   | 5.5   | 0.8 | 0.3 | 0.9 | 0.3 |
| 8226 | 028c06 | AV629827 | LCL067a08 |   |   | 3.7   | 2.7   | 3.3   | 0.7 | 0.1 | 0.9 | 0.3 |
| 8227 | 125a03 | AV640383 | HCL015c07 |   |   | 23.5  | 22.4  | 25.8  | 1.0 | 0.0 | 0.9 | 0.1 |
| 8228 | 117a12 | AV632183 | HC005a05  |   |   | 17.8  | 13.0  | 14.6  | 0.9 | 0.5 | 0.9 | 0.1 |
| 8229 | 113b04 | AV392794 | CM064a11  |   |   | 79.2  | 77.1  | 82.7  | 0.9 | 0.2 | 0.9 | 0.2 |
| 8230 | 152e12 | AV630032 | LCL071f04 |   |   | 10.9  | 9.4   | 10.5  | 0.9 | 0.1 | 0.9 | 0.1 |
| 8231 | 146c07 | AV627048 | LCL020c09 |   |   | 14.7  | 13.7  | 15.7  | 0.9 | 0.1 | 0.9 | 0.3 |
| 8232 | 021d09 | AV622369 | LC048g03  |   |   | 7.2   | 6.6   | 7.5   | 0.9 | 0.4 | 0.9 | 0.4 |
| 8233 | 146e06 | AV627126 | LCL021e04 |   |   | 8.7   | 9.0   | 10.1  | 1.1 | 0.2 | 0.9 | 0.1 |
| 8234 | 123g04 | AV639759 | HCL004e07 |   |   | 8.9   | 8.0   | 9.4   | 0.9 | 0.3 | 0.9 | 0.3 |
| 8235 | 118f11 | AV634091 | HC029b05  |   |   | 23.5  | 12.5  | 13.6  | 0.6 | 0.2 | 0.9 | 0.3 |
| 8236 |        |          |           |   |   |       |       |       |     |     |     |     |

|      | A      | B        | C         | D | E | F     | G     | H     | I   | J   | K   | L   |
|------|--------|----------|-----------|---|---|-------|-------|-------|-----|-----|-----|-----|
| 8237 | 026h03 | AV628583 | LCL044b04 |   |   | 2.3   | 2.5   | 2.9   | 1.2 | 0.5 | 0.9 | 0.2 |
| 8238 | 113g05 | AV389324 | CM070c11  |   |   | 9.8   | 10.2  | 11.6  | 1.0 | 0.1 | 0.9 | 0.2 |
| 8239 | 009e05 | AV391693 | CM092f07  |   |   | 12.1  | 11.4  | 13.0  | 0.9 | 0.1 | 0.9 | 0.2 |
| 8240 | 114b07 | BP098652 | MXL096h12 |   |   | 8.8   | 7.8   | 8.7   | 0.9 | 0.2 | 0.9 | 0.2 |
| 8241 | 010b05 | AV632255 | HC005h05  |   |   | 14.5  | 14.5  | 16.4  | 1.0 | 0.1 | 0.9 | 0.1 |
| 8242 | 010g07 | AV633528 | HC021h01  |   |   | 36.4  | 31.9  | 35.7  | 0.9 | 0.1 | 0.9 | 0.0 |
| 8243 | 138h05 | AV622672 | LC052g12  |   |   | 17.7  | 14.2  | 16.6  | 0.8 | 0.2 | 0.9 | 0.2 |
| 8244 | 142c08 | AV625053 | LC087b11  |   |   | 33.5  | 31.0  | 35.0  | 1.0 | 0.3 | 0.9 | 0.2 |
| 8245 | 128d11 | AV642390 | HCL051a05 |   |   | 14.8  | 14.2  | 15.9  | 1.0 | 0.3 | 0.9 | 0.1 |
| 8246 | 109e04 | AV387627 | CM027b12  |   |   | 7.2   | 7.2   | 8.1   | 1.0 | 0.2 | 0.9 | 0.1 |
| 8247 | 134d08 | AV619225 | LC005d05  |   |   | 8.7   | 7.4   | 9.2   | 0.9 | 0.3 | 0.9 | 0.4 |
| 8248 | 149c04 | AV628432 | LCL041g09 |   |   | 10.9  | 8.2   | 9.4   | 0.8 | 0.1 | 0.9 | 0.3 |
| 8249 | 023e12 | AV625227 | LC089e10  |   |   | 37.1  | 28.2  | 34.2  | 0.8 | 0.1 | 0.9 | 0.4 |
| 8250 | 153g05 | AV630636 | LCL081h05 |   |   | 8.4   | 7.5   | 8.8   | 1.0 | 0.3 | 0.9 | 0.2 |
| 8251 | 167g04 | BP096180 | MXL054b05 |   |   | 9.6   | 6.3   | 10.0  | 0.6 | 0.4 | 0.9 | 0.8 |
| 8252 | 032d04 | BP093200 | MXL004h08 |   |   | 13.8  | 10.7  | 13.3  | 0.8 | 0.1 | 0.9 | 0.4 |
| 8253 | 130a04 | AV643180 | HCL065b07 |   |   | 7.4   | 7.2   | 8.3   | 1.0 | 0.2 | 0.9 | 0.2 |
| 8254 | 171c04 | BP097808 | MXL081f06 |   |   | 10.7  | 8.4   | 10.1  | 0.8 | 0.1 | 0.9 | 0.3 |
| 8255 | 113b11 | AV392842 | CM064h01  |   |   | 10.4  | 9.5   | 11.6  | 0.9 | 0.2 | 0.9 | 0.4 |
| 8256 | 033g03 | BP094826 | MXL030e02 |   |   | 10.4  | 9.6   | 10.8  | 0.9 | 0.1 | 0.9 | 0.1 |
| 8257 | 006d08 | AV389883 | CM040d04  |   |   | 16.9  | 24.6  | 28.1  | 1.7 | 0.9 | 0.9 | 0.3 |
| 8258 | 105h07 | AV396888 | CL71g12   |   |   | 6.5   | 5.1   | 6.2   | 0.8 | 0.1 | 0.9 | 0.2 |
| 8259 | 150b10 | AV628913 | LCL048h07 |   |   | 12.5  | 10.3  | 12.0  | 0.9 | 0.2 | 0.9 | 0.2 |
| 8260 | 153d04 | AV630466 | LCL079c08 |   |   | 52.0  | 50.0  | 64.4  | 1.0 | 0.2 | 0.9 | 0.3 |
| 8261 | 151d08 | AV629471 | LCL059d05 |   |   | 15.7  | 12.3  | 14.0  | 0.8 | 0.1 | 0.9 | 0.2 |
| 8262 | 153g08 | AV630659 | LCL082c04 |   |   | 7.5   | 6.6   | 7.8   | 0.9 | 0.2 | 0.9 | 0.3 |
| 8263 | 112c10 | AV391721 | CM055g11  |   |   | 21.1  | 27.3  | 30.8  | 1.6 | 0.7 | 0.9 | 0.3 |
| 8264 | 144b07 | AV626162 | LCL003d05 |   |   | 33.2  | 31.3  | 35.5  | 0.9 | 0.2 | 0.9 | 0.0 |
| 8265 | 145e11 | AV626754 | LCL014h07 |   |   | 59.9  | 35.5  | 41.4  | 0.6 | 0.1 | 0.9 | 0.3 |
| 8266 | 148d02 | AV627975 | LCL034g02 |   |   | 14.4  | 10.7  | 12.1  | 0.8 | 0.3 | 0.9 | 0.1 |
| 8267 | 128h03 | AV642572 | HCL054a11 |   |   | 21.0  | 15.7  | 18.0  | 0.8 | 0.2 | 0.9 | 0.1 |
| 8268 | 164d12 | BP094750 | MXL028f12 |   |   | 9.8   | 12.0  | 14.1  | 1.2 | 0.1 | 0.9 | 0.3 |
| 8269 | 105g05 | AV396950 | CL68g04   |   |   | 7.8   | 7.6   | 8.9   | 1.0 | 0.1 | 0.9 | 0.3 |
| 8270 | 154f03 | AV631045 | LCL088a11 |   |   | 107.0 | 92.7  | 104.5 | 0.9 | 0.1 | 0.9 | 0.2 |
| 8271 | 143e10 | AV625796 | LC097h10  |   |   | 12.5  | 10.0  | 12.5  | 0.9 | 0.3 | 0.9 | 0.3 |
| 8272 | 025g11 | AV627865 | LCL033a12 |   |   | 16.7  | 14.8  | 18.4  | 0.9 | 0.0 | 0.9 | 0.3 |
| 8273 | 129h10 | AV643135 | HCL064d03 |   |   | 8.7   | 9.0   | 10.4  | 1.0 | 0.2 | 0.9 | 0.3 |
| 8274 | 154g04 | AV631121 | LCL089b11 |   |   | 6.1   | 5.5   | 6.4   | 0.9 | 0.0 | 0.9 | 0.2 |
| 8275 | 008h10 | AV389877 | CM080b06  |   |   | 3.0   | 3.7   | 4.4   | 1.3 | 0.3 | 0.9 | 0.4 |
| 8276 | 127d06 | AV641785 | HCL040b08 |   |   | 7.3   | 5.9   | 6.7   | 0.8 | 0.1 | 0.9 | 0.1 |
| 8277 | 165f10 | BP095311 | MXL039g05 |   |   | 8.9   | 7.9   | 9.3   | 0.9 | 0.1 | 0.9 | 0.2 |
| 8278 | 117g11 | AV633180 | HC017g02  |   |   | 19.4  | 11.0  | 12.7  | 0.6 | 0.2 | 0.9 | 0.2 |
| 8279 | 149g01 | AV628615 | LCL044e10 |   |   | 23.5  | 22.1  | 25.2  | 0.9 | 0.1 | 0.9 | 0.1 |
| 8280 | 162g11 | BP093935 | MXL015h04 |   |   | 7.5   | 7.2   | 8.2   | 0.9 | 0.4 | 0.9 | 0.4 |
| 8281 | 167h02 | BP096223 | MXL054h02 |   |   | 315.0 | 268.7 | 292.9 | 0.9 | 0.5 | 0.9 | 0.3 |
| 8282 | 162e01 | BP093739 | MXL012h03 |   |   | 12.6  | 15.1  | 17.1  | 1.2 | 0.1 | 0.9 | 0.1 |
| 8283 | 021d11 | AV622376 | LC048h02  |   |   | 19.9  | 67.9  | 79.5  | 3.4 | 0.6 | 0.9 | 0.1 |
| 8284 | 016f02 | AV642353 | HCL050c10 |   |   | 1.5   | 2.3   | 3.0   | 1.8 | 0.8 | 0.9 | 0.4 |
| 8285 | 121b08 | AV636902 | HC065h01  |   |   | 11.5  | 9.6   | 11.1  | 0.8 | 0.2 | 0.9 | 0.3 |
| 8286 | 110e08 | AV389461 | CM036h08  |   |   | 27.4  | 24.1  | 27.6  | 0.9 | 0.1 | 0.9 | 0.1 |
| 8287 | 167d06 | BP096032 | MXL051d10 |   |   | 28.0  | 14.9  | 17.5  | 0.5 | 0.1 | 0.9 | 0.5 |
| 8288 | 124f09 | AV640223 | HCL012e02 |   |   | 37.8  | 34.7  | 41.1  | 0.9 | 0.1 | 0.9 | 0.3 |
| 8289 | 132c09 | AV644634 | HCL091e08 |   |   | 46.5  | 43.2  | 51.7  | 1.0 | 0.3 | 0.9 | 0.3 |
| 8290 | 130g02 | AV643656 | HCL073e10 |   |   | 12.4  | 12.4  | 15.9  | 1.0 | 0.0 | 0.9 | 0.4 |
| 8291 | 128b05 | AV642193 | HCL047b12 |   |   | 7.4   | 6.7   | 7.6   | 0.9 | 0.3 | 0.9 | 0.1 |
| 8292 | 132c10 | AV644638 | HCL091e12 |   |   | 10.2  | 8.9   | 10.0  | 0.9 | 0.1 | 0.9 | 0.1 |
| 8293 | 017b09 | AV642955 | HCL061b09 |   |   | 5.7   | 4.7   | 5.9   | 0.8 | 0.2 | 0.9 | 0.4 |
| 8294 | 130e10 | AV643559 | HCL071f11 |   |   | 18.8  | 17.2  | 19.3  | 0.9 | 0.1 | 0.9 | 0.2 |
| 8295 | 168d01 | BP096434 | MXL058f08 |   |   | 21.7  | 25.2  | 33.2  | 1.2 | 0.1 | 0.9 | 0.4 |
| 8296 | 154e02 | AV630977 | LCL087b05 |   |   | 12.9  | 8.3   | 9.6   | 0.7 | 0.1 | 0.9 | 0.1 |
| 8297 | 133a08 | AV644939 | HCL095g04 |   |   | 7.9   | 6.5   | 7.5   | 0.8 | 0.0 | 0.9 | 0.1 |
| 8298 | 110d07 | AV389256 | CM035g08  |   |   | 5.0   | 4.4   | 5.1   | 0.9 | 0.1 | 0.9 | 0.2 |
| 8299 | 014g07 | AV640439 | HCL016c10 |   |   | 3.0   | 4.0   | 4.7   | 1.3 | 0.2 | 0.9 | 0.3 |
| 8300 | 169e05 | BP097007 | MXL068f03 |   |   | 10.9  | 11.4  | 13.7  | 1.0 | 0.1 | 0.9 | 0.4 |
| 8301 | 152c08 | AV629880 | LCL068b10 |   |   | 7.0   | 5.7   | 6.6   | 0.8 | 0.0 | 0.9 | 0.1 |
| 8302 | 146f10 | AV627185 | LCL022d02 |   |   | 23.3  | 22.4  | 26.0  | 1.0 | 0.1 | 0.9 | 0.2 |
| 8303 | 128a04 | AV642123 | HCL045h12 |   |   | 13.0  | 12.4  | 14.5  | 1.0 | 0.2 | 0.9 | 0.3 |
| 8304 | 014f02 | AV640171 | HCL011e12 |   |   | 35.1  | 33.4  | 40.2  | 1.0 | 0.2 | 0.9 | 0.2 |
| 8305 | 132d03 | AV644667 | HCL091h09 |   |   | 6.3   | 4.8   | 5.4   | 0.8 | 0.1 | 0.9 | 0.2 |
| 8306 | 027c10 | AV629107 | LCL052b07 |   |   | 6.1   | 4.3   | 5.7   | 0.8 | 0.3 | 0.9 | 0.5 |
| 8307 | 002c11 | AV395137 | CL36f04   |   |   | 5.4   | 4.3   | 5.5   | 0.9 | 0.4 | 0.9 | 0.4 |
| 8308 | 111h11 | AV391300 | CM053c01  |   |   | 86.3  | 74.8  | 85.7  | 0.9 | 0.1 | 0.9 | 0.1 |
| 8309 | 154d04 | AV630944 | LCL086f10 |   |   | 12.0  | 11.7  | 14.5  | 1.1 | 0.2 | 0.9 | 0.4 |
| 8310 | 021g05 | AV622869 | LC055g09  |   |   | 6.8   | 5.4   | 6.3   | 0.8 | 0.1 | 0.9 | 0.3 |
| 8311 | 119g09 | AV635411 | HC046a09  |   |   | 6.8   | 4.4   | 5.4   | 0.6 | 0.1 | 0.9 | 0.2 |
| 8312 | 033a05 | BP093881 | MXL015b01 |   |   | 70.5  | 36.6  | 46.0  | 0.6 | 0.2 | 0.9 | 0.3 |
| 8313 | 144f04 | AV626307 | LCL006e11 |   |   | 50.4  | 30.1  | 36.4  | 0.6 | 0.2 | 0.9 | 0.3 |
| 8314 | 138f05 | AV622438 | LC049g03  |   |   | 7.5   | 5.7   | 6.6   | 0.8 | 0.1 | 0.9 | 0.2 |
| 8315 | 017b10 | AV642969 | HCL061d08 |   |   | 7.1   | 6.4   | 8.0   | 0.9 | 0.3 | 0.9 | 0.4 |
| 8316 | 126e04 | AV641289 | HCL031b02 |   |   | 11.4  | 11.2  | 12.7  | 1.0 | 0.2 | 0.9 | 0.1 |
| 8317 | 140g05 | AV624066 | LC072e01  |   |   | 4.4   | 3.9   | 4.5   | 0.9 | 0.1 | 0.9 | 0.1 |
| 8318 | 103d03 | AV395081 | CL35g09   |   |   | 4.8   | 4.8   | 6.0   | 1.0 | 0.1 | 0.9 | 0.3 |
| 8319 | 016b06 | AV627241 | LCL023e03 |   |   | 9.4   | 7.4   | 8.7   | 0.8 | 0.1 | 0.9 | 0.2 |
| 8320 | 103d02 | AV395094 | CL35e08   |   |   | 10.6  | 8.7   | 9.9   | 0.8 | 0.2 | 0.9 | 0.2 |
| 8321 | 162g04 | BP093904 | MXL015d05 |   |   | 7.8   | 5.7   | 7.9   | 0.7 | 0.2 | 0.9 | 0.5 |
| 8322 | 112d04 | AV391780 | CM056c12  |   |   | 35.2  | 24.2  | 27.3  | 0.7 | 0.0 | 0.9 | 0.1 |
| 8323 | 103f03 | AV395214 | CL39d11   |   |   | 7.8   | 6.5   | 7.6   | 0.9 | 0.2 | 0.9 | 0.2 |
| 8324 | 155d05 | AV631404 | LCL093c10 |   |   | 120.4 | 159.0 | 181.7 | 1.3 | 0.1 | 0.9 | 0.2 |
| 8325 | 129g01 | AV642999 | HCL061h09 |   |   | 22.2  | 18.6  | 21.8  | 0.8 | 0.1 | 0.9 | 0.2 |
| 8326 | 006g06 | AV390439 | CM046c04  |   |   | 6.7   | 6.3   | 7.3   | 1.0 | 0.2 | 0.9 | 0.1 |
| 8327 | 162h05 | BP093986 | MXL016f01 |   |   | 22.9  | 19.3  | 37.3  | 0.8 | 0.2 | 0.9 | 0.8 |
| 8328 | 138f07 | AV622459 | LC050a07  |   |   | 13.9  | 11.7  | 13.0  | 0.8 | 0.1 | 0.9 | 0.3 |
| 8329 | 008h11 | AV389861 | CM080c01  |   |   | 21.6  | 12.8  | 14.6  | 0.6 | 0.1 | 0.9 | 0.1 |
| 8330 | 163g08 | BP094499 | MXL024a12 |   |   | 13.0  | 12.0  | 18.2  | 1.0 | 0.8 | 0.9 | 0.8 |
| 8331 | 004c11 | AV387210 | CM006e09  |   |   | 14.2  | 20.3  | 23.0  | 1.4 | 0.4 | 0.9 | 0.1 |
| 8332 | 137e04 | AV621661 | LC039c05  |   |   | 18.2  | 15.1  | 17.1  | 0.8 | 0.0 | 0.9 | 0.1 |
| 8333 | 146h01 | AV627258 | LCL023h04 |   |   | 14.7  | 14.5  | 17.7  | 1.0 | 0.4 | 0.9 | 0.5 |
| 8334 | 146d10 | AV627097 | LCL021a11 |   |   | 11.3  | 9.4   | 10.8  | 0.9 | 0.3 | 0.9 | 0.2 |
| 8335 | 153b02 | AV630318 | LCL077b11 |   |   | 35.1  | 30.5  | 35.2  | 0.9 | 0.2 | 0.9 | 0.1 |
| 8336 | 157e11 | BP087036 | MX023e03  |   |   | 8.8   | 5.3   | 5.8   | 0.6 | 0.2 | 0.9 | 0.2 |
| 8337 | 107g08 | AV387153 | CM012f09  |   |   | 3.7   | 3.5   | 4.0   | 1.0 | 0.1 | 0.9 | 0.1 |
| 8338 | 138d08 | AV622251 | LC047b08  |   |   | 8.6   | 10.0  | 12.1  | 1.3 | 0.4 | 0.9 | 0.3 |
| 8339 | 003d11 | AV396637 | CL64d03   |   |   | 2.5   | 3.0   | 3.5   | 1.3 | 0.3 | 0.9 | 0.3 |
| 8340 | 020f04 | AV621249 | LC033d07  |   |   | 50.9  | 44.1  | 50.3  | 1.1 | 0.6 | 0.9 | 0.1 |
| 8341 | 132a01 | AV644390 | HCL087f10 |   |   | 35.2  | 35.5  | 40.4  | 1.0 | 0.2 | 0.9 | 0.1 |
| 8342 | 131e10 | AV644180 | HCL083d07 |   |   | 49.4  | 40.5  | 46.1  | 0.8 | 0.0 | 0.9 | 0.0 |
| 8343 | 145d12 | AV626711 |           |   |   |       |       |       |     |     |     |     |

|      | A      | B        | C         | D | E | F     | G     | H     | I   | J   | K   | L   |
|------|--------|----------|-----------|---|---|-------|-------|-------|-----|-----|-----|-----|
| 8344 | 004g12 | AV387398 | CM014d05  |   |   | 4.8   | 7.6   | 8.6   | 1.6 | 0.4 | 0.9 | 0.1 |
| 8345 | 154a11 | AV630784 | LCL084c07 |   |   | 12.1  | 10.0  | 11.3  | 0.8 | 0.1 | 0.9 | 0.1 |
| 8346 | 152g03 | AV630095 | LCL073a08 |   |   | 26.9  | 21.3  | 24.1  | 0.8 | 0.1 | 0.9 | 0.1 |
| 8347 | 144a07 | AV626088 | LCL002c01 |   |   | 31.8  | 26.9  | 33.2  | 0.8 | 0.0 | 0.9 | 0.2 |
| 8348 | 015d08 | AV641093 | HCL027f09 |   |   | 1.0   | 1.2   | 1.4   | 1.4 | 0.7 | 0.9 | 0.3 |
| 8349 | 111f02 | AV390920 | CM048h04  |   |   | 29.1  | 21.1  | 24.5  | 0.7 | 0.1 | 0.9 | 0.3 |
| 8350 | 112g09 | AV392311 | CM060g06  |   |   | 7.5   | 5.5   | 6.5   | 0.7 | 0.1 | 0.9 | 0.3 |
| 8351 | 124b08 | AV640023 | HCL009a04 |   |   | 6.6   | 6.1   | 7.1   | 0.9 | 0.1 | 0.9 | 0.2 |
| 8352 | 151e09 | AV629568 | LCL061b09 |   |   | 4.9   | 4.6   | 5.3   | 0.9 | 0.1 | 0.9 | 0.1 |
| 8353 | 033f09 | BP094729 | MXL028c10 |   |   | 16.6  | 18.0  | 20.8  | 1.1 | 0.2 | 0.9 | 0.1 |
| 8354 | 007c03 | AV391350 | CM053d05  |   |   | 49.3  | 61.8  | 70.4  | 1.3 | 0.0 | 0.9 | 0.1 |
| 8355 | 145f02 | AV626764 | LCL015a09 |   |   | 24.5  | 19.5  | 22.2  | 0.8 | 0.1 | 0.9 | 0.0 |
| 8356 | 163g10 | BP094511 | MXL024c02 |   |   | 4.5   | 4.3   | 5.4   | 0.9 | 0.4 | 0.9 | 0.6 |
| 8357 | 002a09 | AV394633 | CL29h08   |   |   | 9.3   | 9.8   | 11.9  | 1.1 | 0.3 | 0.9 | 0.3 |
| 8358 | 141g06 | AV624723 | LCL081g01 |   |   | 10.4  | 7.8   | 9.0   | 0.8 | 0.1 | 0.9 | 0.1 |
| 8359 | 029f06 | AV630962 | LCL086f08 |   |   | 32.6  | 26.4  | 30.8  | 0.8 | 0.1 | 0.9 | 0.2 |
| 8360 | 129e02 | BP098750 | MXL098e04 |   |   | 11.8  | 11.2  | 13.0  | 1.0 | 0.1 | 0.9 | 0.1 |
| 8361 | 034d06 | BP095701 | MXL046a08 |   |   | 11.6  | 9.5   | 11.0  | 0.8 | 0.2 | 0.9 | 0.4 |
| 8362 | 014f11 | AV640321 | HCL014c06 |   |   | 5.1   | 4.8   | 5.8   | 1.0 | 0.4 | 0.9 | 0.4 |
| 8363 | 029e09 | AV630926 | LCL086e09 |   |   | 43.1  | 34.9  | 42.9  | 0.8 | 0.1 | 0.9 | 0.3 |
| 8364 | 130b05 | AV643260 | HCL066e03 |   |   | 7.8   | 7.0   | 8.1   | 0.9 | 0.1 | 0.9 | 0.1 |
| 8365 | 124e02 | AV640156 | HCL011d02 |   |   | 17.7  | 17.6  | 20.1  | 1.0 | 0.1 | 0.9 | 0.0 |
| 8366 | 004g10 | AV387063 | CM013h03  |   |   | 80.6  | 79.5  | 90.3  | 1.0 | 0.1 | 0.9 | 0.2 |
| 8367 | 029h10 | AV631224 | LCL090e06 |   |   | 9.4   | 13.0  | 15.6  | 1.5 | 0.4 | 0.9 | 0.2 |
| 8368 | 033a09 | BP093946 | MXL016b01 |   |   | 20.1  | 17.4  | 20.1  | 0.9 | 0.1 | 0.9 | 0.2 |
| 8369 | 136f07 | AV620801 | LCL027a08 |   |   | 11.5  | 10.0  | 11.5  | 0.9 | 0.1 | 0.9 | 0.1 |
| 8370 | 115a02 | AV390286 | CM082g05  |   |   | 25.4  | 34.8  | 39.8  | 1.5 | 0.4 | 0.9 | 0.1 |
| 8371 | 004b11 | AV386647 | CM004c07  |   |   | 19.4  | 24.9  | 33.4  | 1.5 | 0.8 | 0.9 | 0.5 |
| 8372 | 141e02 | AV624517 | LCL078g10 |   |   | 38.2  | 10.8  | 13.0  | 0.3 | 0.2 | 0.9 | 0.3 |
| 8373 | 150b05 | AV628872 | LCL048c07 |   |   | 27.5  | 22.2  | 25.4  | 0.8 | 0.1 | 0.9 | 0.1 |
| 8374 | 036c10 | BP098063 | MXL086d01 |   |   | 8.5   | 7.1   | 8.1   | 0.8 | 0.1 | 0.9 | 0.2 |
| 8375 | 117g03 | AV633067 | HC016c12  |   |   | 116.1 | 118.4 | 144.9 | 1.0 | 0.1 | 0.9 | 0.3 |
| 8376 | 028d06 | AV629931 | LCL069d01 |   |   | 25.8  | 17.9  | 21.7  | 0.7 | 0.2 | 0.9 | 0.2 |
| 8377 | 012d08 | AV636840 | HC064h09  |   |   | 2.9   | 3.2   | 3.9   | 1.1 | 0.1 | 0.9 | 0.4 |
| 8378 | 159g07 | BP088091 | MX051c07  |   |   | 6.6   | 7.3   | 9.9   | 1.1 | 0.7 | 0.9 | 0.6 |
| 8379 | 114b06 | AV389055 | CM073g12  |   |   | 52.8  | 33.8  | 40.0  | 0.6 | 0.1 | 0.9 | 0.4 |
| 8380 | 151a07 | AV629301 | LCL056b10 |   |   | 30.3  | 26.4  | 31.2  | 0.9 | 0.1 | 0.9 | 0.1 |
| 8381 | 147f10 | AV627608 | LCL029d07 |   |   | 16.2  | 13.0  | 15.1  | 0.8 | 0.0 | 0.9 | 0.1 |
| 8382 | 102g11 | AV394815 | CL28b04   |   |   | 15.7  | 12.7  | 14.0  | 0.8 | 0.4 | 0.9 | 0.3 |
| 8383 | 103a01 | AV394759 | CL30a12   |   |   | 4.3   | 5.6   | 6.6   | 1.3 | 0.0 | 0.9 | 0.1 |
| 8384 | 007f07 | AV392120 | CM058d07  |   |   | 4.6   | 4.5   | 5.1   | 1.0 | 0.2 | 0.9 | 0.2 |
| 8385 | 154c06 | AV630877 | LCL085f01 |   |   | 8.3   | 6.9   | 7.9   | 0.9 | 0.3 | 0.9 | 0.0 |
| 8386 | 136e08 | AV620745 | LC026c08  |   |   | 9.3   | 7.6   | 8.8   | 0.8 | 0.0 | 0.9 | 0.0 |
| 8387 | 026h01 | AV628572 | LCL043h09 |   |   | 7.1   | 7.7   | 9.1   | 1.1 | 0.2 | 0.9 | 0.3 |
| 8388 | 110f10 | AV389685 | CM039a07  |   |   | 6.0   | 5.0   | 5.8   | 0.8 | 0.0 | 0.9 | 0.1 |
| 8389 | 165g01 | BP095322 | MXL039h09 |   |   | 6.5   | 4.5   | 6.0   | 0.7 | 0.4 | 0.9 | 0.6 |
| 8390 | 144h11 | AV626447 | LCL009c03 |   |   | 19.8  | 19.1  | 21.8  | 1.0 | 0.0 | 0.9 | 0.2 |
| 8391 | 031c12 | BP086784 | MX016g04  |   |   | 22.2  | 19.8  | 23.1  | 0.9 | 0.1 | 0.9 | 0.2 |
| 8392 | 127d01 | AV641761 | HCL039h04 |   |   | 4.3   | 3.9   | 4.6   | 0.9 | 0.1 | 0.9 | 0.2 |
| 8393 | 127h11 | AV642079 | HCL045b11 |   |   | 15.1  | 12.2  | 17.8  | 0.8 | 0.1 | 0.9 | 0.5 |
| 8394 | 111a12 | AV390183 | CM043b06  |   |   | 23.0  | 19.0  | 21.4  | 1.0 | 0.7 | 0.9 | 0.3 |
| 8395 | 152e11 | AV630028 | LCL071e01 |   |   | 17.0  | 19.9  | 25.3  | 1.2 | 0.1 | 0.9 | 0.4 |
| 8396 | 132f01 | AV644743 | HCL093b11 |   |   | 21.5  | 18.1  | 22.1  | 0.8 | 0.1 | 0.9 | 0.3 |
| 8397 | 020h12 | AV621756 | LC040e08  |   |   | 4.7   | 7.2   | 8.5   | 1.6 | 0.5 | 0.9 | 0.2 |
| 8398 | 160e06 | BP088705 | MX066h10  |   |   | 6.6   | 7.5   | 8.7   | 1.1 | 0.1 | 0.9 | 0.1 |
| 8399 | 154d06 | AV630950 | LCL086g07 |   |   | 8.0   | 7.9   | 9.5   | 1.0 | 0.2 | 0.9 | 0.1 |
| 8400 | 003e06 | AV396728 | CL66c06   |   |   | 127.9 | 141.7 | 163.8 | 1.1 | 0.1 | 0.9 | 0.1 |
| 8401 | 134e08 | AV619364 | LC007c08  |   |   | 9.5   | 7.4   | 8.8   | 0.8 | 0.1 | 0.9 | 0.2 |
| 8402 | 032f06 | BP093504 | MXL009c10 |   |   | 10.0  | 8.9   | 10.5  | 0.9 | 0.2 | 0.9 | 0.2 |
| 8403 | 102f02 | AV394411 | CL24h01   |   |   | 6.9   | 5.7   | 6.6   | 0.8 | 0.1 | 0.9 | 0.1 |
| 8404 | 111g12 | AV391167 | CM051d05  |   |   | 17.4  | 14.2  | 16.5  | 0.8 | 0.1 | 0.9 | 0.2 |
| 8405 | 171f11 | BP098039 | MXL085g06 |   |   | 20.3  | 16.7  | 19.6  | 0.8 | 0.3 | 0.9 | 0.4 |
| 8406 | 123c05 | AV639418 | HC099a12  |   |   | 20.5  | 19.8  | 22.8  | 1.0 | 0.1 | 0.9 | 0.1 |
| 8407 | 171f02 | BP097996 | MXL085a02 |   |   | 17.4  | 15.8  | 21.9  | 0.9 | 0.5 | 0.9 | 0.7 |
| 8408 | 108a05 | AV387424 | CM015f12  |   |   | 27.8  | 48.0  | 54.4  | 1.8 | 0.3 | 0.9 | 0.1 |
| 8409 | 153g09 | AV630666 | LCL082d04 |   |   | 13.0  | 16.0  | 17.0  | 1.1 | 0.5 | 0.9 | 0.4 |
| 8410 | 036d09 | BP098242 | MXL090a04 |   |   | 20.8  | 17.1  | 18.6  | 0.8 | 0.3 | 0.9 | 0.3 |
| 8411 | 156e05 | BP086160 | MX003a06  |   |   | 9.7   | 9.3   | 11.4  | 1.1 | 0.6 | 0.9 | 0.3 |
| 8412 | 137f10 | AV621781 | LC040h03  |   |   | 3.7   | 3.0   | 3.4   | 0.8 | 0.1 | 0.9 | 0.2 |
| 8413 | 154e12 | AV631016 | LCL087f08 |   |   | 5.6   | 5.0   | 5.9   | 0.9 | 0.2 | 0.9 | 0.2 |
| 8414 | 144g02 | AV626330 | LCL007b03 |   |   | 6.1   | 5.2   | 6.3   | 0.9 | 0.1 | 0.9 | 0.2 |
| 8415 | 166d01 | BP095597 | MXL044d03 |   |   | 15.5  | 12.5  | 14.4  | 0.8 | 0.2 | 0.9 | 0.2 |
| 8416 | 164g06 | BP094902 | MXL032a07 |   |   | 17.5  | 13.0  | 15.7  | 0.7 | 0.3 | 0.9 | 0.5 |
| 8417 | 023b10 | AV624761 | LC082c08  |   |   | 12.7  | 7.8   | 9.1   | 0.6 | 0.1 | 0.9 | 0.1 |
| 8418 | 010b11 | AV632347 | HC007a08  |   |   | 96.9  | 97.1  | 111.9 | 1.0 | 0.2 | 0.9 | 0.1 |
| 8419 | 149b04 | AV628358 | LCL040e10 |   |   | 33.8  | 25.6  | 31.7  | 0.8 | 0.1 | 0.9 | 0.3 |
| 8420 | 014d10 | AV640047 | HCL009d03 |   |   | 5.4   | 6.1   | 6.9   | 1.1 | 0.2 | 0.9 | 0.1 |
| 8421 | 029f10 | AV631002 | LCL087e02 |   |   | 5.7   | 5.5   | 6.5   | 1.0 | 0.2 | 0.9 | 0.3 |
| 8422 | 011c10 | AV634666 | HC036c03  |   |   | 25.8  | 27.6  | 31.9  | 1.1 | 0.2 | 0.9 | 0.1 |
| 8423 | 118g01 | AV634102 | HC029c10  |   |   | 10.3  | 7.9   | 9.0   | 0.7 | 0.2 | 0.9 | 0.3 |
| 8424 | 036e02 | BP098272 | MXL090f04 |   |   | 6.9   | 8.3   | 9.4   | 1.4 | 1.0 | 0.9 | 0.3 |
| 8425 | 033c12 | BP094326 | MXL021c08 |   |   | 26.3  | 22.5  | 29.3  | 0.9 | 0.1 | 0.9 | 0.4 |
| 8426 | 135a08 | AV619658 | LC011d09  |   |   | 9.1   | 8.6   | 9.8   | 0.9 | 0.1 | 0.9 | 0.1 |
| 8427 | 149e08 | AV628529 | LCL043c11 |   |   | 18.3  | 16.8  | 20.2  | 0.9 | 0.2 | 0.9 | 0.3 |
| 8428 | 035h09 | BP097521 | MXL077b12 |   |   | 2.4   | 2.7   | 3.3   | 1.2 | 0.2 | 0.9 | 0.3 |
| 8429 | 008f04 | AV388813 | CM072g06  |   |   | 10.8  | 7.9   | 9.3   | 0.7 | 0.2 | 0.9 | 0.1 |
| 8430 | 102b01 | AV394065 | CL18f09   |   |   | 5.9   | 9.6   | 11.2  | 1.8 | 0.6 | 0.9 | 0.2 |
| 8431 | 026e11 | AV628435 | LCL041g12 |   |   | 16.7  | 10.9  | 12.7  | 0.7 | 0.0 | 0.9 | 0.2 |
| 8432 | 130b04 | AV643251 | HCL066d05 |   |   | 15.0  | 13.9  | 16.3  | 0.9 | 0.1 | 0.9 | 0.2 |
| 8433 | 171h12 | BP098167 | MXL088f01 |   |   | 11.1  | 10.0  | 12.1  | 0.9 | 0.2 | 0.9 | 0.4 |
| 8434 | 125f04 | AV640716 | HCL021c01 |   |   | 7.0   | 7.0   | 8.2   | 1.0 | 0.2 | 0.9 | 0.1 |
| 8435 | 139f05 | AV623247 | LC061a06  |   |   | 4.5   | 4.7   | 6.1   | 1.1 | 0.2 | 0.9 | 0.3 |
| 8436 | 146c04 | AV627040 | LCL020b12 |   |   | 8.1   | 7.1   | 8.6   | 0.9 | 0.1 | 0.9 | 0.3 |
| 8437 | 150h09 | AV629271 | LCL055f10 |   |   | 22.8  | 27.5  | 32.3  | 1.2 | 0.2 | 0.9 | 0.1 |
| 8438 | 103c09 | AV394935 | CL34f07   |   |   | 8.1   | 7.0   | 8.2   | 0.9 | 0.2 | 0.9 | 0.2 |
| 8439 | 123b04 | AV639293 | HC097e04  |   |   | 6.6   | 4.8   | 5.6   | 0.7 | 0.0 | 0.9 | 0.1 |
| 8440 | 129a11 | AV642657 | HCL055e05 |   |   | 14.2  | 14.2  | 16.4  | 1.0 | 0.0 | 0.9 | 0.1 |
| 8441 | 171f01 | BP097992 | MXL084g12 |   |   | 7.2   | 4.9   | 6.2   | 0.6 | 0.3 | 0.9 | 0.6 |
| 8442 | 127h03 | AV642035 | HCL044c08 |   |   | 21.4  | 18.3  | 24.7  | 0.9 | 0.1 | 0.9 | 0.3 |
| 8443 | 172c09 | BP098315 | MXL091d06 |   |   | 25.4  | 23.5  | 27.4  | 0.9 | 0.1 | 0.9 | 0.1 |
| 8444 | 164f02 | BP094819 | MXL030c11 |   |   | 9.5   | 8.0   | 11.4  | 0.8 | 0.1 | 0.9 | 0.5 |
| 8445 | 029b07 | AV630634 | LCL081h02 |   |   | 21.9  | 17.5  | 22.0  | 0.8 | 0.1 | 0.9 | 0.2 |
| 8446 | 032d07 | BP093239 | MXL005e03 |   |   | 11.1  | 7.7   | 9.1   | 0.7 | 0.1 | 0.9 | 0.2 |
| 8447 | 024h11 | AV626924 | LCL018b09 |   |   | 17.3  | 11.3  | 14.0  | 0.7 | 0.5 | 0.9 | 0.6 |
| 8448 | 129h11 | AV643146 | HCL064f06 |   |   | 13.4  | 9.9   | 12.0  | 0.8 | 0.1 | 0.9 | 0.3 |
| 8449 | 130h08 | AV643745 | HCL075c06 |   |   | 7.7   | 7.6   | 8.8   | 1.0 | 0.2 | 0.9 | 0.3 |
| 8450 | 142h05 | AV625503 | LC093g    |   |   |       |       |       |     |     |     |     |

|      | A      | B        | C         | D | E | F     | G     | H     | I   | J   | K   | L   |
|------|--------|----------|-----------|---|---|-------|-------|-------|-----|-----|-----|-----|
| 8451 | 015d07 | AV641083 | HCL027e01 |   |   | 2.2   | 2.2   | 2.7   | 1.0 | 0.4 | 0.9 | 0.4 |
| 8452 | 147c01 | AV627430 | LCL026f05 |   |   | 26.2  | 20.2  | 27.2  | 0.8 | 0.1 | 0.9 | 0.4 |
| 8453 | 023g11 | AV626111 | LCL002e06 |   |   | 7.7   | 7.1   | 8.3   | 1.0 | 0.3 | 0.9 | 0.2 |
| 8454 | 162e11 | BP093822 | MXL014c11 |   |   | 28.0  | 22.0  | 25.1  | 0.8 | 0.2 | 0.9 | 0.1 |
| 8455 | 151e11 | AV629574 | LCL061c05 |   |   | 16.6  | 17.8  | 23.0  | 1.1 | 0.1 | 0.9 | 0.3 |
| 8456 | 024h04 | AV626878 | LCL017b09 |   |   | 51.7  | 46.7  | 54.3  | 1.3 | 0.9 | 0.9 | 0.1 |
| 8457 | 005a10 | AV387228 | CM018e12  |   |   | 11.0  | 12.1  | 14.0  | 1.1 | 0.2 | 0.9 | 0.1 |
| 8458 | 125d01 | AV640597 | HCL018h06 |   |   | 11.7  | 10.9  | 12.7  | 0.9 | 0.1 | 0.9 | 0.2 |
| 8459 | 014d11 | AV640404 | HCL015f09 |   |   | 16.8  | 10.3  | 13.1  | 0.6 | 0.1 | 0.9 | 0.3 |
| 8460 | 116d11 | AV393289 | CM099e03  |   |   | 9.6   | 8.5   | 9.8   | 0.9 | 0.0 | 0.9 | 0.1 |
| 8461 | 017g11 | AV643755 | HCL075d09 |   |   | 19.7  | 14.9  | 20.8  | 0.8 | 0.2 | 0.9 | 0.5 |
| 8462 | 170f12 | BP097562 | MXL077g06 |   |   | 12.5  | 11.8  | 14.3  | 1.0 | 0.3 | 0.9 | 0.3 |
| 8463 | 114d10 | AV387991 | CM076g12  |   |   | 12.6  | 12.0  | 14.0  | 0.9 | 0.2 | 0.9 | 0.3 |
| 8464 | 167d10 | BP096051 | MXL051g03 |   |   | 5.2   | 5.0   | 6.0   | 1.1 | 0.5 | 0.9 | 0.3 |
| 8465 | 166f10 | BP095732 | MXL046e09 |   |   | 23.8  | 26.5  | 31.1  | 1.1 | 0.2 | 0.9 | 0.2 |
| 8466 | 022h11 | AV624441 | LC077g12  |   |   | 11.3  | 12.0  | 13.9  | 1.1 | 0.1 | 0.9 | 0.2 |
| 8467 | 118g02 | BP383696 | HC029d12  |   |   | 108.5 | 87.3  | 108.5 | 0.8 | 0.1 | 0.9 | 0.3 |
| 8468 | 028e11 | AV630119 | LCL073e05 |   |   | 15.1  | 13.6  | 16.1  | 1.0 | 0.4 | 0.9 | 0.2 |
| 8469 | 143h02 | AV626014 | LCL001b01 |   |   | 8.0   | 7.2   | 8.4   | 0.9 | 0.2 | 0.9 | 0.2 |
| 8470 | 156f03 | BP086227 | MX004e09  |   |   | 4.0   | 5.1   | 7.0   | 1.3 | 0.2 | 0.9 | 0.6 |
| 8471 | 148a07 | AV627811 | LCL032d05 |   |   | 17.4  | 18.2  | 21.1  | 1.1 | 0.2 | 0.9 | 0.1 |
| 8472 | 106a03 | AV396985 | CL73f03   |   |   | 5.6   | 7.0   | 10.4  | 1.8 | 1.0 | 0.9 | 0.7 |
| 8473 | 103f10 | AV395363 | CL40f04   |   |   | 15.4  | 15.0  | 17.5  | 1.0 | 0.1 | 0.9 | 0.2 |
| 8474 | 149c02 | AV628415 | LCL041d11 |   |   | 18.3  | 16.6  | 22.7  | 0.9 | 0.1 | 0.9 | 0.5 |
| 8475 | 126b10 | AV641073 | HCL027c07 |   |   | 16.1  | 14.7  | 17.1  | 0.9 | 0.1 | 0.9 | 0.1 |
| 8476 | 162f12 | BP093887 | MXL015b08 |   |   | 9.1   | 8.1   | 10.3  | 0.9 | 0.1 | 0.9 | 0.4 |
| 8477 | 011b06 | AV634382 | HC032f09  |   |   | 16.4  | 12.9  | 16.0  | 0.8 | 0.0 | 0.9 | 0.3 |
| 8478 | 147h04 | AV627741 | LCL031d04 |   |   | 115.7 | 98.3  | 114.6 | 0.9 | 0.0 | 0.9 | 0.1 |
| 8479 | 170f08 | BP097536 | MXL077d09 |   |   | 19.2  | 14.1  | 19.1  | 0.8 | 0.4 | 0.9 | 0.6 |
| 8480 | 008e07 | AV388518 | CM071d02  |   |   | 156.2 | 112.7 | 139.8 | 0.7 | 0.2 | 0.9 | 0.4 |
| 8481 | 015b06 | AV640735 | HCL021e07 |   |   | 22.4  | 19.2  | 22.4  | 1.0 | 0.4 | 0.9 | 0.1 |
| 8482 | 143h03 | BP098800 | MXL099d01 |   |   | 23.4  | 15.7  | 18.3  | 0.7 | 0.1 | 0.9 | 0.1 |
| 8483 | 120e06 | AV636104 | HC055b12  |   |   | 15.1  | 14.1  | 16.9  | 0.9 | 0.1 | 0.9 | 0.2 |
| 8484 | 111d07 | AV390625 | CM047c02  |   |   | 4.5   | 5.3   | 6.3   | 1.2 | 0.3 | 0.9 | 0.1 |
| 8485 | 107b10 | AV386777 | CM007f12  |   |   | 6.6   | 6.4   | 7.6   | 1.0 | 0.3 | 0.9 | 0.1 |
| 8486 | 029c12 | AV630783 | LCL084c06 |   |   | 11.0  | 10.0  | 11.6  | 0.9 | 0.1 | 0.9 | 0.1 |
| 8487 | 120a06 | AV635658 | HC049b11  |   |   | 6.8   | 4.7   | 5.5   | 0.7 | 0.1 | 0.9 | 0.2 |
| 8488 | 145e09 | AV626733 | LCL014f04 |   |   | 27.4  | 26.3  | 30.4  | 1.0 | 0.2 | 0.9 | 0.1 |
| 8489 | 115e05 | AV391045 | CM088g12  |   |   | 12.6  | 8.7   | 10.1  | 0.7 | 0.1 | 0.9 | 0.1 |
| 8490 | 131b06 | AV643890 | HCL077h06 |   |   | 23.1  | 18.4  | 21.5  | 0.8 | 0.1 | 0.9 | 0.1 |
| 8491 | 156g05 | BP086330 | MX006f12  |   |   | 14.1  | 9.3   | 13.0  | 0.7 | 0.3 | 0.9 | 0.5 |
| 8492 | 130d11 | AV643471 | HCL070c03 |   |   | 13.6  | 12.4  | 14.4  | 0.9 | 0.1 | 0.9 | 0.2 |
| 8493 | 166e04 | BP095669 | MXL045e08 |   |   | 5.6   | 6.1   | 7.3   | 1.2 | 0.6 | 0.9 | 0.3 |
| 8494 | 117a09 | AV632131 | HC004c12  |   |   | 8.4   | 7.0   | 9.1   | 0.9 | 0.3 | 0.9 | 0.5 |
| 8495 | 117e03 | AV632771 | HC012d06  |   |   | 9.3   | 7.3   | 8.6   | 0.8 | 0.1 | 0.9 | 0.1 |
| 8496 | 155f01 | AV631480 | LCL094g03 |   |   | 9.0   | 10.1  | 13.6  | 1.1 | 0.2 | 0.9 | 0.5 |
| 8497 | 128c08 | AV642266 | HCL048f09 |   |   | 7.5   | 6.8   | 8.0   | 0.9 | 0.1 | 0.9 | 0.2 |
| 8498 | 139g08 | AV623381 | LC062h10  |   |   | 23.6  | 22.6  | 26.2  | 1.1 | 0.3 | 0.9 | 0.1 |
| 8499 | 010h10 | AV633808 | HC025e07  |   |   | 34.9  | 35.2  | 43.1  | 1.0 | 0.0 | 0.9 | 0.2 |
| 8500 | 007c09 | AV391413 | CM054b04  |   |   | 6.1   | 7.6   | 8.9   | 1.2 | 0.1 | 0.9 | 0.2 |
| 8501 | 002g08 | AV397764 | CL49f02   |   |   | 12.2  | 10.8  | 13.1  | 0.9 | 0.1 | 0.9 | 0.3 |
| 8502 | 144f05 | AV626309 | LCL006f04 |   |   | 17.5  | 12.4  | 15.4  | 0.7 | 0.1 | 0.9 | 0.2 |
| 8503 | 109a09 | BP383676 | CM023e06  |   |   | 12.9  | 8.8   | 10.3  | 0.7 | 0.1 | 0.9 | 0.3 |
| 8504 | 026a06 | AV628014 | LCL035d02 |   |   | 3.6   | 3.2   | 3.7   | 0.9 | 0.2 | 0.9 | 0.1 |
| 8505 | 141f02 | AV624606 | LC080a12  |   |   | 11.5  | 10.7  | 13.2  | 0.9 | 0.2 | 0.9 | 0.3 |
| 8506 | 136a12 | AV620458 | LC022d10  |   |   | 5.8   | 5.6   | 6.7   | 1.0 | 0.2 | 0.9 | 0.2 |
| 8507 | 131e01 | AV644150 | HCL082h08 |   |   | 13.0  | 14.0  | 16.3  | 1.1 | 0.2 | 0.9 | 0.1 |
| 8508 | 149f01 | AV628541 | LCL043e04 |   |   | 18.0  | 14.5  | 17.1  | 0.8 | 0.2 | 0.9 | 0.2 |
| 8509 | 129f05 | AV642980 | HCL061e12 |   |   | 7.2   | 5.8   | 7.0   | 0.8 | 0.2 | 0.9 | 0.2 |
| 8510 | 036a03 | BP097605 | MXL078d06 |   |   | 11.7  | 6.8   | 8.9   | 0.6 | 0.1 | 0.9 | 0.5 |
| 8511 | 150b04 | AV628854 | LCL048a09 |   |   | 18.5  | 14.7  | 19.8  | 0.8 | 0.1 | 0.9 | 0.3 |
| 8512 | 152e01 | AV629990 | LCL070f03 |   |   | 4.8   | 3.2   | 3.7   | 0.7 | 0.1 | 0.9 | 0.1 |
| 8513 | 009h10 | AV631922 | HC001g03  |   |   | 14.8  | 11.1  | 12.8  | 0.8 | 0.2 | 0.9 | 0.1 |
| 8514 | 162e12 | BP093823 | MXL014c12 |   |   | 6.7   | 6.7   | 7.8   | 1.0 | 0.3 | 0.9 | 0.2 |
| 8515 | 144e08 | AV626278 | LCL005f10 |   |   | 12.8  | 12.4  | 14.9  | 1.0 | 0.1 | 0.9 | 0.2 |
| 8516 | 017d06 | AV643205 | HCL065f03 |   |   | 4.9   | 7.4   | 8.6   | 1.5 | 0.5 | 0.9 | 0.4 |
| 8517 | 149f03 | AV628547 | LCL043e12 |   |   | 8.4   | 7.5   | 8.8   | 0.9 | 0.2 | 0.9 | 0.1 |
| 8518 | 129g10 | AV643028 | HCL062e06 |   |   | 8.7   | 8.2   | 10.0  | 1.0 | 0.3 | 0.9 | 0.3 |
| 8519 | 145b09 | AV626546 | LCL011a02 |   |   | 9.0   | 7.7   | 9.1   | 0.9 | 0.2 | 0.9 | 0.1 |
| 8520 | 154e08 | AV631006 | LCL087e08 |   |   | 10.6  | 9.1   | 10.9  | 0.9 | 0.1 | 0.9 | 0.3 |
| 8521 | 126e09 | AV641332 | HCL031g08 |   |   | 7.6   | 5.9   | 7.1   | 0.8 | 0.0 | 0.9 | 0.2 |
| 8522 | 105h10 | AV397023 | CL72d03   |   |   | 5.5   | 4.9   | 5.7   | 0.9 | 0.2 | 0.9 | 0.1 |
| 8523 | 135c04 | AV619820 | LC014a09  |   |   | 8.9   | 8.1   | 9.6   | 0.9 | 0.1 | 0.9 | 0.1 |
| 8524 | 113e01 | AV393146 | CM067h10  |   |   | 127.5 | 136.3 | 173.8 | 1.1 | 0.2 | 0.9 | 0.4 |
| 8525 | 153f03 | AV630561 | LCL080g06 |   |   | 39.5  | 35.6  | 41.3  | 0.9 | 0.3 | 0.9 | 0.2 |
| 8526 | 008f07 | AV388979 | CM074b12  |   |   | 9.1   | 6.4   | 7.9   | 0.7 | 0.0 | 0.9 | 0.2 |
| 8527 | 136d01 | AV620643 | LC024g12  |   |   | 9.6   | 7.4   | 9.1   | 0.8 | 0.3 | 0.9 | 0.3 |
| 8528 | 147h06 | AV627745 | LCL031d08 |   |   | 8.7   | 15.1  | 17.5  | 1.8 | 0.6 | 0.9 | 0.1 |
| 8529 | 122g06 | BP383721 | HC091e06  |   |   | 255.7 | 173.0 | 236.6 | 0.7 | 0.2 | 0.9 | 0.5 |
| 8530 | 028g04 | AV630243 | LCL076a04 |   |   | 17.4  | 15.1  | 17.8  | 0.9 | 0.1 | 0.9 | 0.2 |
| 8531 | 007g07 | AV392276 | CM060d01  |   |   | 9.2   | 7.9   | 9.3   | 0.9 | 0.3 | 0.9 | 0.2 |
| 8532 | 030d05 | AV631615 | LCL097a07 |   |   | 8.5   | 6.7   | 7.8   | 0.8 | 0.1 | 0.9 | 0.1 |
| 8533 | 164d06 | BP094741 | MXL028e11 |   |   | 8.1   | 9.2   | 11.0  | 1.2 | 0.3 | 0.9 | 0.2 |
| 8534 | 019h01 | AV620303 | LC020c09  |   |   | 10.8  | 6.9   | 8.0   | 0.7 | 0.1 | 0.9 | 0.2 |
| 8535 | 015f02 | AV641253 | HCL030e08 |   |   | 1.2   | 1.2   | 1.5   | 1.0 | 0.3 | 0.9 | 0.2 |
| 8536 | 001b03 | AV393368 | CL04g12   |   |   | 7.4   | 10.5  | 12.3  | 1.5 | 0.4 | 0.9 | 0.1 |
| 8537 | 135e10 | AV620043 | LC016g10  |   |   | 24.8  | 20.5  | 24.0  | 0.8 | 0.1 | 0.9 | 0.1 |
| 8538 | 015g07 | AV641417 | HCL033c05 |   |   | 3.9   | 7.5   | 8.8   | 2.0 | 1.0 | 0.9 | 0.3 |
| 8539 | 129a04 | AV642626 | HCL055a03 |   |   | 18.3  | 17.5  | 21.5  | 1.0 | 0.2 | 0.9 | 0.2 |
| 8540 | 024c11 | AV626488 | LCL010a08 |   |   | 23.0  | 13.7  | 16.4  | 0.6 | 0.2 | 0.9 | 0.2 |
| 8541 | 124e05 | AV640170 | HCL011e11 |   |   | 13.9  | 11.3  | 13.3  | 0.8 | 0.1 | 0.9 | 0.1 |
| 8542 | 160e09 | BP088734 | MX067e05  |   |   | 70.7  | 65.2  | 77.8  | 0.9 | 0.1 | 0.9 | 0.2 |
| 8543 | 122a06 | AV637788 | HC077e04  |   |   | 12.0  | 9.3   | 10.9  | 0.8 | 0.1 | 0.9 | 0.1 |
| 8544 | 165d08 | BP095199 | MXL037h02 |   |   | 8.5   | 9.0   | 10.6  | 1.1 | 0.3 | 0.9 | 0.2 |
| 8545 | 113a02 | AV392613 | CM062g03  |   |   | 51.5  | 68.3  | 79.7  | 1.4 | 0.3 | 0.9 | 0.1 |
| 8546 | 146a06 | AV626960 | LCL018h03 |   |   | 11.6  | 8.0   | 9.6   | 0.7 | 0.1 | 0.9 | 0.1 |
| 8547 | 172e07 | BP098422 | MXL093a12 |   |   | 8.0   | 7.5   | 9.7   | 1.0 | 0.2 | 0.9 | 0.4 |
| 8548 | 113f08 | AV387605 | CM069d11  |   |   | 6.3   | 5.7   | 6.7   | 0.9 | 0.3 | 0.9 | 0.1 |
| 8549 | 156d01 | AV631857 | LCL100h06 |   |   | 37.1  | 27.8  | 32.6  | 1.1 | 0.8 | 0.9 | 0.2 |
| 8550 | 124f12 | AV640228 | HCL012e11 |   |   | 18.9  | 15.6  | 18.8  | 0.8 | 0.1 | 0.9 | 0.2 |
| 8551 | 004h12 | AV387445 | CM016h01  |   |   | 4.9   | 7.5   | 10.3  | 1.4 | 0.7 | 0.9 | 0.7 |
| 8552 | 108g03 | AV387968 | CM021e01  |   |   | 8.5   | 9.1   | 10.3  | 1.0 | 0.3 | 0.9 | 0.3 |
| 8553 | 149g12 | AV628688 | LCL045f05 |   |   | 17.8  | 15.2  | 18.0  | 0.9 | 0.1 | 0.9 | 0.1 |
| 8554 | 016b03 | AV641700 | HCL038h09 |   |   | 32.1  | 27.2  | 36.1  | 0.9 | 0.1 | 0.9 | 0.3 |
| 8555 | 150g04 | AV629133 | LCL052g08 |   |   | 34.3  | 29.1  | 35.6  | 0.9 | 0.2 | 0.9 | 0.2 |
| 8556 | 155e11 | AV631469 | LCL094e12 |   |   | 32.3  | 27.3  | 32.2  | 0.9 | 0.3 | 0.9 | 0.2 |
| 8557 | 129c04 | AV6427   |           |   |   |       |       |       |     |     |     |     |

|      | A      | B        | C         | D | E | F     | G     | H     | I   | J   | K   | L   |
|------|--------|----------|-----------|---|---|-------|-------|-------|-----|-----|-----|-----|
| 8558 | 152b01 | AV629800 | LCL066d04 |   |   | 13.8  | 8.4   | 10.0  | 0.6 | 0.0 | 0.9 | 0.2 |
| 8559 | 152h07 | AV630234 | LCL075h01 |   |   | 3.0   | 1.9   | 2.5   | 0.6 | 0.2 | 0.9 | 0.5 |
| 8560 | 104h04 | AV396141 | CL54h08   |   |   | 15.4  | 11.7  | 14.0  | 0.7 | 0.2 | 0.9 | 0.1 |
| 8561 | 026e09 | AV628397 | LCL041b07 |   |   | 19.8  | 14.5  | 18.3  | 0.7 | 0.1 | 0.9 | 0.3 |
| 8562 | 015g04 | AV641344 | HCL032a03 |   |   | 35.6  | 34.7  | 45.1  | 1.0 | 0.2 | 0.9 | 0.2 |
| 8563 | 121f06 | AV637356 | HC072b03  |   |   | 16.5  | 13.3  | 16.4  | 0.8 | 0.1 | 0.9 | 0.3 |
| 8564 | 149c11 | AV628456 | LCL042b08 |   |   | 7.6   | 6.6   | 7.8   | 0.9 | 0.3 | 0.9 | 0.1 |
| 8565 | 102g03 | AV394694 | CL27a11   |   |   | 11.7  | 9.7   | 11.7  | 0.9 | 0.2 | 0.9 | 0.2 |
| 8566 | 129d03 | AV642812 | HCL058e07 |   |   | 13.3  | 14.4  | 17.2  | 1.1 | 0.5 | 0.9 | 0.3 |
| 8567 | 168h12 | BP096762 | MXL064e02 |   |   | 6.5   | 7.1   | 9.2   | 1.0 | 0.2 | 0.9 | 0.6 |
| 8568 | 008g11 | AV389678 | CM076g01  |   |   | 13.8  | 16.3  | 19.8  | 1.2 | 0.2 | 0.9 | 0.2 |
| 8569 | 157d10 | BP086893 | MX019f10  |   |   | 25.4  | 10.8  | 12.7  | 0.4 | 0.1 | 0.9 | 0.4 |
| 8570 | 001e06 | AV393981 | CL15b05   |   |   | 9.1   | 9.4   | 11.2  | 1.0 | 0.1 | 0.9 | 0.1 |
| 8571 | 139e11 | AV623205 | LC060d04  |   |   | 42.0  | 25.3  | 32.3  | 0.6 | 0.1 | 0.9 | 0.3 |
| 8572 | 005b11 | AV397498 | CM020g05  |   |   | 7.8   | 5.8   | 7.1   | 0.9 | 0.5 | 0.9 | 0.3 |
| 8573 | 164d04 | BP094737 | MXL029e03 |   |   | 23.6  | 21.9  | 25.8  | 0.9 | 0.1 | 0.9 | 0.1 |
| 8574 | 166f01 | BP095715 | MXL046c11 |   |   | 35.7  | 26.4  | 33.2  | 0.8 | 0.4 | 0.9 | 0.3 |
| 8575 | 025f05 | AV627622 | LCL029f05 |   |   | 17.0  | 15.4  | 18.8  | 0.9 | 0.1 | 0.9 | 0.2 |
| 8576 | 105g08 | BP098624 | MXL096d12 |   |   | 6.9   | 5.6   | 6.6   | 0.8 | 0.2 | 0.9 | 0.4 |
| 8577 | 138a11 | AV622078 | LC044g04  |   |   | 49.0  | 34.2  | 45.2  | 0.7 | 0.0 | 0.9 | 0.3 |
| 8578 | 027e11 | AV629270 | LCL055f08 |   |   | 5.9   | 5.8   | 6.9   | 1.0 | 0.2 | 0.9 | 0.1 |
| 8579 | 161g01 | BP093281 | MXL006b01 |   |   | 41.5  | 33.9  | 40.0  | 0.8 | 0.0 | 0.9 | 0.1 |
| 8580 | 003c06 | AV396213 | CL58e05   |   |   | 10.6  | 10.0  | 14.8  | 1.0 | 0.3 | 0.9 | 0.4 |
| 8581 | 153a07 | AV630291 | LCL076g07 |   |   | 38.9  | 34.0  | 40.6  | 0.9 | 0.1 | 0.9 | 0.1 |
| 8582 | 111f03 | AV390930 | CM048h05  |   |   | 5.7   | 5.6   | 7.0   | 1.0 | 0.2 | 0.9 | 0.2 |
| 8583 | 016b09 | AV641793 | HCL040d02 |   |   | 9.6   | 8.5   | 10.5  | 0.9 | 0.4 | 0.9 | 0.4 |
| 8584 | 170f03 | BP097495 | MXL076g01 |   |   | 8.1   | 7.7   | 9.1   | 0.9 | 0.3 | 0.9 | 0.4 |
| 8585 | 001b09 | AV393626 | CL06b06   |   |   | 10.2  | 11.3  | 13.4  | 1.4 | 0.9 | 0.9 | 0.2 |
| 8586 | 016f10 | AV642446 | HCL051h05 |   |   | 12.1  | 10.0  | 12.8  | 0.8 | 0.5 | 0.9 | 0.6 |
| 8587 | 144b11 | AV626171 | LCL003e11 |   |   | 24.0  | 23.7  | 29.1  | 1.0 | 0.1 | 0.9 | 0.2 |
| 8588 | 137d11 | AV621588 | LC038b05  |   |   | 15.1  | 16.9  | 20.6  | 1.1 | 0.2 | 0.9 | 0.1 |
| 8589 | 106f05 | AV397862 | CM002c09  |   |   | 18.5  | 12.1  | 14.2  | 0.7 | 0.2 | 0.9 | 0.2 |
| 8590 | 004e10 | AV387004 | CM010c09  |   |   | 6.4   | 5.6   | 6.8   | 0.9 | 0.2 | 0.9 | 0.2 |
| 8591 | 141c01 | AV624353 | LC076e12  |   |   | 14.3  | 7.9   | 10.2  | 0.6 | 0.1 | 0.9 | 0.4 |
| 8592 | 161h01 | BP093353 | MXL007c07 |   |   | 8.1   | 7.5   | 12.2  | 0.9 | 0.3 | 0.9 | 0.7 |
| 8593 | 026b09 | AV628146 | LCL037d09 |   |   | 23.0  | 17.4  | 26.5  | 0.8 | 0.3 | 0.9 | 0.5 |
| 8594 | 029a03 | AV630467 | LCL079c10 |   |   | 20.1  | 15.0  | 21.9  | 0.8 | 0.1 | 0.9 | 0.5 |
| 8595 | 170f01 | BP097483 | MXL076e01 |   |   | 9.1   | 6.8   | 13.6  | 0.7 | 0.4 | 0.9 | 0.8 |
| 8596 | 032b10 | BP093037 | MXL002e02 |   |   | 14.1  | 9.7   | 11.6  | 0.7 | 0.1 | 0.8 | 0.2 |
| 8597 | 147c11 | AV627487 | LCL027e04 |   |   | 16.0  | 14.7  | 17.5  | 0.9 | 0.1 | 0.8 | 0.2 |
| 8598 | 016g03 | AV642497 | HCL052h01 |   |   | 9.7   | 11.7  | 15.7  | 1.3 | 0.3 | 0.8 | 0.4 |
| 8599 | 024e09 | AV626643 | LCL012h02 |   |   | 11.9  | 10.2  | 12.1  | 0.9 | 0.1 | 0.8 | 0.1 |
| 8600 | 108e10 | AV397470 | CM020e06  |   |   | 10.7  | 9.0   | 10.8  | 0.9 | 0.2 | 0.8 | 0.1 |
| 8601 | 126d08 | AV641261 | HCL030f12 |   |   | 8.8   | 6.3   | 7.8   | 0.7 | 0.1 | 0.8 | 0.2 |
| 8602 | 161d11 | BP093161 | MXL004d04 |   |   | 12.8  | 10.5  | 13.0  | 0.9 | 0.3 | 0.8 | 0.3 |
| 8603 | 125g02 | AV640770 | HCL022b04 |   |   | 14.8  | 15.6  | 18.5  | 1.1 | 0.2 | 0.8 | 0.1 |
| 8604 | 151g12 | AV629698 | LCL064a04 |   |   | 7.7   | 22.2  | 25.4  | 3.1 | 1.9 | 0.8 | 0.4 |
| 8605 | 101c01 | AV393425 | CL03d04   |   |   | 18.4  | 22.7  | 27.6  | 1.2 | 0.4 | 0.8 | 0.4 |
| 8606 | 121e07 | AV637255 | HC070g02  |   |   | 7.2   | 5.5   | 6.6   | 0.8 | 0.3 | 0.8 | 0.2 |
| 8607 | 167h10 | BP096248 | MXL055c10 |   |   | 6.4   | 6.2   | 8.7   | 0.9 | 0.5 | 0.8 | 0.8 |
| 8608 | 124g03 | AV640243 | HCL012h11 |   |   | 30.4  | 27.2  | 34.9  | 0.9 | 0.1 | 0.8 | 0.3 |
| 8609 | 018a04 | AV644086 | HCL081e10 |   |   | 25.8  | 24.3  | 31.3  | 0.9 | 0.2 | 0.8 | 0.2 |
| 8610 | 015c04 | AV640861 | HCL023f09 |   |   | 11.7  | 8.1   | 9.8   | 0.8 | 0.4 | 0.8 | 0.3 |
| 8611 | 145h01 | AV626877 | LCL017b07 |   |   | 10.9  | 8.3   | 9.8   | 0.8 | 0.1 | 0.8 | 0.1 |
| 8612 | 130e12 | AV643574 | HCL072b02 |   |   | 16.5  | 13.7  | 21.2  | 0.8 | 0.0 | 0.8 | 0.5 |
| 8613 | 172e05 | BP098407 | MXL092h07 |   |   | 24.0  | 25.6  | 30.0  | 1.0 | 0.3 | 0.8 | 0.2 |
| 8614 | 125d10 | AV640624 | HCL019d07 |   |   | 18.9  | 14.5  | 17.3  | 0.8 | 0.2 | 0.8 | 0.2 |
| 8615 | 150h04 | AV629196 | LCL054a09 |   |   | 43.3  | 36.6  | 47.8  | 0.8 | 0.1 | 0.8 | 0.4 |
| 8616 | 131a10 | AV643845 | HCL077a12 |   |   | 18.0  | 14.8  | 17.7  | 0.8 | 0.1 | 0.8 | 0.1 |
| 8617 | 127e06 | AV641861 | HCL041e04 |   |   | 12.1  | 9.7   | 11.7  | 0.8 | 0.1 | 0.8 | 0.1 |
| 8618 | 167d12 | BP096059 | MXL051h03 |   |   | 5.9   | 5.9   | 6.9   | 1.0 | 0.2 | 0.8 | 0.2 |
| 8619 | 128g03 | AV642493 | HCL052g07 |   |   | 22.0  | 19.2  | 25.3  | 0.9 | 0.1 | 0.8 | 0.3 |
| 8620 | 125f06 | AV640736 | HCL021e08 |   |   | 5.5   | 4.7   | 5.8   | 0.9 | 0.1 | 0.8 | 0.3 |
| 8621 | 166f06 | BP095728 | MXL046e01 |   |   | 9.4   | 6.7   | 8.1   | 0.7 | 0.0 | 0.8 | 0.2 |
| 8622 | 131f06 | AV644234 | HCL084e01 |   |   | 8.5   | 8.0   | 9.9   | 0.9 | 0.1 | 0.8 | 0.3 |
| 8623 | 134h06 | AV619583 | LC010d02  |   |   | 13.6  | 12.7  | 16.9  | 1.0 | 0.3 | 0.8 | 0.3 |
| 8624 | 113h10 | AV388677 | CM071h08  |   |   | 11.1  | 8.3   | 9.9   | 0.8 | 0.1 | 0.8 | 0.1 |
| 8625 | 120g08 | AV636406 | HC059a11  |   |   | 4.2   | 4.6   | 5.6   | 1.1 | 0.1 | 0.8 | 0.3 |
| 8626 | 156h08 | BP086420 | MX008e03  |   |   | 152.7 | 140.7 | 166.5 | 1.0 | 0.5 | 0.8 | 0.3 |
| 8627 | 144a03 | AV626070 | LCL001h11 |   |   | 35.1  | 24.8  | 32.3  | 0.7 | 0.1 | 0.8 | 0.3 |
| 8628 | 149h03 | AV628700 | LCL045h01 |   |   | 12.2  | 11.1  | 13.2  | 0.9 | 0.1 | 0.8 | 0.1 |
| 8629 | 170d01 | BP097371 | MXL074e12 |   |   | 9.4   | 5.9   | 7.2   | 0.6 | 0.0 | 0.8 | 0.3 |
| 8630 | 140c11 | AV623767 | LC068g04  |   |   | 29.3  | 36.5  | 43.1  | 1.3 | 0.4 | 0.8 | 0.0 |
| 8631 | 154h08 | AV631192 | LCL090a10 |   |   | 37.0  | 31.2  | 41.4  | 0.9 | 0.3 | 0.8 | 0.4 |
| 8632 | 017g08 | AV643671 | HCL073h09 |   |   | 4.5   | 3.8   | 4.5   | 0.9 | 0.2 | 0.8 | 0.1 |
| 8633 | 165f05 | BP095281 | MXL039c10 |   |   | 8.0   | 6.5   | 8.3   | 0.8 | 0.3 | 0.8 | 0.3 |
| 8634 | 168e11 | BP096588 | MXL061c03 |   |   | 12.3  | 12.2  | 14.5  | 1.0 | 0.1 | 0.8 | 0.3 |
| 8635 | 168h11 | BP096759 | MXL064d10 |   |   | 4.4   | 4.1   | 7.6   | 0.9 | 0.4 | 0.8 | 0.9 |
| 8636 | 011h07 | AV635695 | HC049f06  |   |   | 18.5  | 16.2  | 19.6  | 0.9 | 0.1 | 0.8 | 0.1 |
| 8637 | 033h11 | BP095117 | MXL036b03 |   |   | 16.8  | 14.2  | 17.0  | 0.9 | 0.1 | 0.8 | 0.2 |
| 8638 | 129c05 | AV642773 | HCL057f07 |   |   | 13.9  | 14.2  | 17.1  | 1.0 | 0.1 | 0.8 | 0.1 |
| 8639 | 153d01 | AV630456 | LCL079b03 |   |   | 5.4   | 3.6   | 4.2   | 0.7 | 0.2 | 0.8 | 0.1 |
| 8640 | 156h01 | BP086361 | MX007c07  |   |   | 22.2  | 13.3  | 15.7  | 0.6 | 0.2 | 0.8 | 0.3 |
| 8641 | 012e06 | AV637006 | HC067c10  |   |   | 129.8 | 74.3  | 89.9  | 0.6 | 0.1 | 0.8 | 0.1 |
| 8642 | 012f09 | AV637243 | HC070f01  |   |   | 5.4   | 6.0   | 7.1   | 1.1 | 0.3 | 0.8 | 0.1 |
| 8643 | 014f01 | AV640154 | HCL011c12 |   |   | 26.4  | 29.3  | 39.0  | 1.1 | 0.3 | 0.8 | 0.3 |
| 8644 | 104e10 | AV395935 | CL51d08   |   |   | 5.5   | 3.8   | 4.6   | 0.7 | 0.2 | 0.8 | 0.1 |
| 8645 | 149f10 | AV628604 | LCL044d09 |   |   | 8.5   | 7.3   | 9.1   | 0.9 | 0.2 | 0.8 | 0.3 |
| 8646 | 002e06 | AV395477 | CL42b07   |   |   | 9.1   | 11.8  | 16.2  | 1.3 | 0.2 | 0.8 | 0.4 |
| 8647 | 132g06 | AV644821 | HCL094c04 |   |   | 14.3  | 13.3  | 16.7  | 0.9 | 0.2 | 0.8 | 0.2 |
| 8648 | 170g03 | BP097568 | MXL077h05 |   |   | 28.4  | 26.3  | 30.4  | 0.9 | 0.2 | 0.8 | 0.4 |
| 8649 | 158f11 | BP087686 | MX041d06  |   |   | 118.9 | 97.2  | 119.2 | 0.8 | 0.1 | 0.8 | 0.3 |
| 8650 | 126g01 | AV641438 | HCL033f03 |   |   | 12.5  | 11.5  | 13.8  | 1.0 | 0.1 | 0.8 | 0.2 |
| 8651 | 149c03 | AV628417 | LCL041e01 |   |   | 8.5   | 6.8   | 8.0   | 0.8 | 0.2 | 0.8 | 0.1 |
| 8652 | 170h02 | BP097618 | MXL078e10 |   |   | 18.9  | 16.6  | 21.1  | 0.8 | 0.7 | 0.8 | 0.7 |
| 8653 | 110e05 | AV389380 | CM036d03  |   |   | 7.2   | 5.4   | 6.4   | 0.8 | 0.2 | 0.8 | 0.1 |
| 8654 | 146c08 | AV627052 | LCL020d01 |   |   | 7.7   | 7.5   | 9.5   | 1.0 | 0.4 | 0.8 | 0.2 |
| 8655 | 002e08 | AV395457 | CL42e01   |   |   | 9.0   | 7.2   | 8.9   | 0.8 | 0.2 | 0.8 | 0.2 |
| 8656 | 104d10 | AV395762 | CL50c10   |   |   | 3.3   | 3.1   | 3.8   | 0.9 | 0.1 | 0.8 | 0.3 |
| 8657 | 026e10 | AV628404 | LCL041c07 |   |   | 14.4  | 11.7  | 14.1  | 0.8 | 0.1 | 0.8 | 0.2 |
| 8658 | 106a12 | AV397075 | CL75a08   |   |   | 5.6   | 6.8   | 8.1   | 1.3 | 0.3 | 0.8 | 0.2 |
| 8659 | 006e08 | AV390053 | CM042a01  |   |   | 7.2   | 9.3   | 11.0  | 1.3 | 0.4 | 0.8 | 0.1 |
| 8660 | 030d06 | AV631628 | LCL097c02 |   |   | 9.0   | 6.0   | 7.1   | 0.7 | 0.1 | 0.8 | 0.1 |
| 8661 | 146c10 | AV627065 | LCL020e09 |   |   | 60.0  | 33.5  | 44.2  | 0.5 | 0.1 | 0.8 | 0.5 |
| 8662 | 034g09 | BP096243 | MXL055c02 |   |   | 14.0  | 7.9   | 9.6   | 0.6 | 0.1 | 0.8 | 0.2 |
| 8663 | 002g06 | AV397736 | CL49c08   |   |   | 8.6   | 7.5   | 8.9   | 0.9 | 0.1 | 0.8 | 0.3 |
| 8664 | 136a03 | AV620387 |           |   |   |       |       |       |     |     |     |     |

|      | A      | B        | C         | D | E | F     | G     | H     | I   | J   | K   | L   |
|------|--------|----------|-----------|---|---|-------|-------|-------|-----|-----|-----|-----|
| 8665 | 023f04 | AV625275 | LC090c06  |   |   | 13.8  | 10.4  | 12.5  | 0.8 | 0.1 | 0.8 | 0.1 |
| 8666 | 125e09 | AV640684 | HCL020e05 |   |   | 11.8  | 8.5   | 11.9  | 0.7 | 0.1 | 0.8 | 0.5 |
| 8667 | 137h10 | AV621974 | LC043d06  |   |   | 5.7   | 4.0   | 4.8   | 0.7 | 0.2 | 0.8 | 0.1 |
| 8668 | 123a04 | AV639101 | HC095a05  |   |   | 26.4  | 24.1  | 28.8  | 0.9 | 0.1 | 0.8 | 0.1 |
| 8669 | 107f01 | BP383673 | CM011a02  |   |   | 63.0  | 39.0  | 48.9  | 0.6 | 0.4 | 0.8 | 0.6 |
| 8670 | 144f12 | AV626327 | LCL007a07 |   |   | 34.6  | 26.1  | 31.1  | 0.8 | 0.1 | 0.8 | 0.2 |
| 8671 | 024c05 | AV626458 | LCL009d10 |   |   | 10.3  | 7.4   | 8.9   | 0.7 | 0.1 | 0.8 | 0.2 |
| 8672 | 023b07 | AV624728 | LC081g08  |   |   | 136.5 | 67.5  | 80.7  | 0.5 | 0.0 | 0.8 | 0.3 |
| 8673 | 144f01 | AV626304 | LCL006d10 |   |   | 20.8  | 15.2  | 18.1  | 0.8 | 0.1 | 0.8 | 0.1 |
| 8674 | 018f11 | AV619043 | LC003a05  |   |   | 4.0   | 4.2   | 5.1   | 1.1 | 0.2 | 0.8 | 0.5 |
| 8675 | 159f05 | BP087955 | MX047h06  |   |   | 12.4  | 13.9  | 17.4  | 1.3 | 0.6 | 0.8 | 0.2 |
| 8676 | 125h08 | AV640846 | HCL023d01 |   |   | 25.3  | 25.4  | 34.8  | 1.0 | 0.1 | 0.8 | 0.4 |
| 8677 | 169c09 | BP096913 | MXL067a06 |   |   | 11.6  | 12.1  | 14.5  | 1.0 | 0.1 | 0.8 | 0.1 |
| 8678 | 028f10 | AV630193 | LCL075b05 |   |   | 1.5   | 2.0   | 2.4   | 1.3 | 0.3 | 0.8 | 0.4 |
| 8679 | 161h11 | BP093391 | MXL007g06 |   |   | 12.2  | 12.7  | 16.2  | 0.9 | 0.5 | 0.8 | 0.7 |
| 8680 | 171c05 | BP097814 | MXL081g05 |   |   | 15.1  | 21.9  | 25.6  | 1.6 | 0.9 | 0.8 | 0.1 |
| 8681 | 146e08 | AV627141 | LCL021g06 |   |   | 23.8  | 20.7  | 25.1  | 0.9 | 0.1 | 0.8 | 0.1 |
| 8682 | 127f01 | AV641910 | HCL042c08 |   |   | 19.8  | 18.0  | 22.3  | 0.9 | 0.0 | 0.8 | 0.2 |
| 8683 | 151h04 | AV629713 | LCL064c08 |   |   | 9.8   | 7.6   | 9.0   | 0.8 | 0.1 | 0.8 | 0.3 |
| 8684 | 030f04 | AV631827 | LCL100e02 |   |   | 2.3   | 1.7   | 2.0   | 0.7 | 0.3 | 0.8 | 0.4 |
| 8685 | 152c10 | AV629901 | LCL068f06 |   |   | 47.8  | 26.2  | 33.7  | 0.6 | 0.0 | 0.8 | 0.3 |
| 8686 | 105f07 | AV396718 | CL67b11   |   |   | 10.1  | 9.0   | 12.0  | 0.9 | 0.2 | 0.8 | 0.3 |
| 8687 | 006g07 | AV390446 | CM046d09  |   |   | 20.8  | 20.8  | 25.6  | 1.0 | 0.1 | 0.8 | 0.3 |
| 8688 | 116b10 | AV393071 | CM097c09  |   |   | 6.0   | 6.4   | 7.8   | 1.2 | 0.5 | 0.8 | 0.1 |
| 8689 | 020e10 | AV621162 | LC032b04  |   |   | 14.3  | 11.8  | 14.4  | 0.8 | 0.1 | 0.8 | 0.2 |
| 8690 | 124h01 | AV640296 | HCL013h02 |   |   | 14.0  | 10.9  | 13.3  | 0.8 | 0.3 | 0.8 | 0.1 |
| 8691 | 002f02 | AV395536 | CL43c05   |   |   | 6.6   | 6.7   | 8.2   | 1.1 | 0.3 | 0.8 | 0.2 |
| 8692 | 147f07 | AV627639 | LCL029h05 |   |   | 5.7   | 5.3   | 6.3   | 0.9 | 0.1 | 0.8 | 0.1 |
| 8693 | 135a11 | AV619677 | LC011f07  |   |   | 18.9  | 17.8  | 21.4  | 0.9 | 0.1 | 0.8 | 0.1 |
| 8694 | 159d04 | BP087776 | MX043d05  |   |   | 36.0  | 28.5  | 38.5  | 0.8 | 0.1 | 0.8 | 0.5 |
| 8695 | 030d04 | AV631588 | LCL096e09 |   |   | 14.0  | 12.0  | 14.4  | 0.9 | 0.2 | 0.8 | 0.1 |
| 8696 | 029d04 | AV630799 | LCL084d12 |   |   | 6.6   | 3.6   | 4.2   | 0.5 | 0.1 | 0.8 | 0.2 |
| 8697 | 147d10 | AV627542 | LCL028c06 |   |   | 29.5  | 24.5  | 29.4  | 0.8 | 0.1 | 0.8 | 0.1 |
| 8698 | 116e07 | AV393233 | CM100a10  |   |   | 88.6  | 42.7  | 50.3  | 0.5 | 0.2 | 0.8 | 0.3 |
| 8699 | 036c11 | BP098066 | MXL086d06 |   |   | 7.8   | 6.4   | 8.1   | 0.8 | 0.2 | 0.8 | 0.4 |
| 8700 | 131b09 | AV643925 | HCL078e06 |   |   | 19.4  | 18.6  | 23.4  | 1.0 | 0.1 | 0.8 | 0.3 |
| 8701 | 034h10 | BP096432 | MXL058f06 |   |   | 21.2  | 19.8  | 31.4  | 0.9 | 0.1 | 0.8 | 0.5 |
| 8702 | 117a11 | AV632143 | HC004e03  |   |   | 23.3  | 19.4  | 23.1  | 0.8 | 0.1 | 0.8 | 0.1 |
| 8703 | 167e02 | BP096077 | MXL052c03 |   |   | 9.5   | 8.8   | 10.6  | 1.0 | 0.2 | 0.8 | 0.5 |
| 8704 | 126c01 | AV641092 | HCL027f08 |   |   | 14.8  | 10.0  | 12.0  | 0.8 | 0.3 | 0.8 | 0.1 |
| 8705 | 001g02 | AV394327 | CL20g10   |   |   | 6.5   | 6.4   | 8.1   | 1.0 | 0.3 | 0.8 | 0.2 |
| 8706 | 116g05 | AV631878 | HC001b10  |   |   | 7.3   | 6.7   | 8.1   | 0.9 | 0.2 | 0.8 | 0.1 |
| 8707 | 163d11 | BP094273 | MXL020d07 |   |   | 11.7  | 9.4   | 12.0  | 0.8 | 0.2 | 0.8 | 0.3 |
| 8708 | 016f11 | AV642451 | HCL052a08 |   |   | 26.3  | 19.1  | 26.6  | 0.8 | 0.2 | 0.8 | 0.3 |
| 8709 | 104e12 | AV395930 | CL51e04   |   |   | 2.0   | 1.5   | 1.8   | 0.7 | 0.1 | 0.8 | 0.1 |
| 8710 | 148c11 | AV627957 | LCL034e01 |   |   | 26.9  | 27.5  | 37.7  | 1.0 | 0.0 | 0.8 | 0.3 |
| 8711 | 138f03 | BP383799 | LC049c08  |   |   | 296.9 | 116.8 | 158.0 | 0.4 | 0.2 | 0.8 | 0.6 |
| 8712 | 033b08 | BP094155 | MXL018h04 |   |   | 14.8  | 9.1   | 10.9  | 0.7 | 0.2 | 0.8 | 0.0 |
| 8713 | 018c10 | AV644417 | HCL088b06 |   |   | 1.9   | 1.1   | 1.2   | 0.6 | 0.3 | 0.8 | 0.4 |
| 8714 | 155f07 | AV631527 | LCL095f09 |   |   | 11.3  | 12.0  | 14.5  | 1.1 | 0.4 | 0.8 | 0.1 |
| 8715 | 010g12 | AV633587 | HC022i05  |   |   | 21.8  | 16.6  | 19.9  | 0.8 | 0.1 | 0.8 | 0.1 |
| 8716 | 015a07 | AV640701 | HCL020h11 |   |   | 24.0  | 23.0  | 28.9  | 1.1 | 0.6 | 0.8 | 0.3 |
| 8717 | 157h12 | BP087324 | MX031h04  |   |   | 5.9   | 6.8   | 9.3   | 1.1 | 0.5 | 0.8 | 0.6 |
| 8718 | 149e10 | AV628534 | LCL043d08 |   |   | 14.9  | 14.0  | 16.8  | 1.0 | 0.3 | 0.8 | 0.1 |
| 8719 | 113f04 | AV397564 | CM069a12  |   |   | 17.1  | 12.0  | 14.5  | 0.7 | 0.1 | 0.8 | 0.1 |
| 8720 | 124h09 | AV640349 | HCL014g01 |   |   | 18.4  | 14.4  | 17.5  | 0.8 | 0.0 | 0.8 | 0.2 |
| 8721 | 028h03 | AV630331 | LCL077d07 |   |   | 36.7  | 33.3  | 42.0  | 1.0 | 0.2 | 0.8 | 0.2 |
| 8722 | 118c01 | AV633605 | HC022h03  |   |   | 4.1   | 5.7   | 7.7   | 1.4 | 0.3 | 0.8 | 0.3 |
| 8723 | 006f12 | AV390342 | CM045c06  |   |   | 12.0  | 10.5  | 12.8  | 0.9 | 0.4 | 0.8 | 0.4 |
| 8724 | 146b07 | AV627015 | LCL019g11 |   |   | 20.3  | 18.4  | 23.6  | 0.9 | 0.2 | 0.8 | 0.3 |
| 8725 | 166g01 | BP095737 | MXL046f02 |   |   | 12.7  | 9.9   | 12.3  | 0.8 | 0.5 | 0.8 | 0.5 |
| 8726 | 034e06 | BP095901 | MXL049a07 |   |   | 11.6  | 8.6   | 10.2  | 0.7 | 0.1 | 0.8 | 0.2 |
| 8727 | 014b11 | AV639814 | HCL005d08 |   |   | 15.9  | 13.4  | 20.1  | 0.9 | 0.2 | 0.8 | 0.4 |
| 8728 | 026h07 | AV628652 | LCL045b04 |   |   | 8.9   | 7.9   | 11.0  | 0.9 | 0.2 | 0.8 | 0.4 |
| 8729 | 161g02 | BP093299 | MXL006d07 |   |   | 24.6  | 20.8  | 25.3  | 0.9 | 0.3 | 0.8 | 0.3 |
| 8730 | 151h11 | AV629731 | LCL064h08 |   |   | 16.9  | 16.6  | 21.3  | 1.0 | 0.1 | 0.8 | 0.3 |
| 8731 | 118c05 | AV633645 | HC023d09  |   |   | 60.5  | 33.0  | 43.8  | 0.5 | 0.1 | 0.8 | 0.5 |
| 8732 | 150g11 | AV629175 | LCL053f12 |   |   | 10.6  | 12.0  | 14.5  | 1.1 | 0.2 | 0.8 | 0.2 |
| 8733 | 155c08 | AV631371 | LCL092g11 |   |   | 31.0  | 29.8  | 36.5  | 1.0 | 0.2 | 0.8 | 0.1 |
| 8734 | 152f12 | AV630083 | LCL072g03 |   |   | 23.5  | 13.2  | 15.9  | 0.6 | 0.1 | 0.8 | 0.2 |
| 8735 | 104e02 | AV395778 | CL50e12   |   |   | 10.5  | 10.3  | 12.4  | 1.0 | 0.1 | 0.8 | 0.1 |
| 8736 | 106b02 | AV397071 | CL75b06   |   |   | 41.9  | 47.0  | 58.0  | 1.3 | 0.7 | 0.8 | 0.3 |
| 8737 | 150h02 | AV629188 | LCL053h05 |   |   | 7.0   | 5.7   | 6.9   | 0.8 | 0.1 | 0.8 | 0.1 |
| 8738 | 127g02 | AV641971 | HCL043c04 |   |   | 30.9  | 27.8  | 39.2  | 0.9 | 0.1 | 0.8 | 0.4 |
| 8739 | 003f02 | AV396787 | CL69a06   |   |   | 13.5  | 16.7  | 19.4  | 1.3 | 0.2 | 0.8 | 0.2 |
| 8740 | 150d11 | AV629003 | LCL050b11 |   |   | 10.2  | 9.8   | 12.2  | 1.0 | 0.2 | 0.8 | 0.2 |
| 8741 | 144g05 | AV626365 | LCL007h07 |   |   | 18.6  | 13.6  | 16.6  | 0.8 | 0.2 | 0.8 | 0.1 |
| 8742 | 028e08 | AV630099 | LCL073b02 |   |   | 37.2  | 32.2  | 41.1  | 0.9 | 0.2 | 0.8 | 0.2 |
| 8743 | 006b08 | AV389263 | CM035h08  |   |   | 10.6  | 8.2   | 9.9   | 0.8 | 0.2 | 0.8 | 0.1 |
| 8744 | 127g09 | AV642002 | HCL043f12 |   |   | 8.3   | 8.4   | 11.1  | 1.0 | 0.1 | 0.8 | 0.3 |
| 8745 | 121a07 | AV636647 | HC062d01  |   |   | 17.5  | 10.6  | 12.9  | 0.6 | 0.1 | 0.8 | 0.2 |
| 8746 | 108f06 | AV387930 | CM021a09  |   |   | 36.2  | 13.2  | 16.5  | 0.4 | 0.1 | 0.8 | 0.2 |
| 8747 | 122a03 | AV637734 | HC076g10  |   |   | 24.9  | 22.8  | 30.5  | 0.9 | 0.1 | 0.8 | 0.3 |
| 8748 | 151d10 | AV629491 | LCL059g02 |   |   | 14.1  | 14.3  | 17.2  | 1.0 | 0.1 | 0.8 | 0.1 |
| 8749 | 124b06 | AV640008 | HCL008g01 |   |   | 10.6  | 12.5  | 15.3  | 1.2 | 0.1 | 0.8 | 0.2 |
| 8750 | 013g12 | AV639583 | HCL001d04 |   |   | 4.7   | 3.5   | 4.7   | 0.7 | 0.3 | 0.8 | 0.6 |
| 8751 | 002b11 | AV394957 | CL33g10   |   |   | 5.0   | 2.9   | 3.4   | 0.7 | 0.4 | 0.8 | 0.1 |
| 8752 | 127g01 | AV641969 | HCL043c02 |   |   | 14.2  | 13.1  | 15.8  | 0.9 | 0.2 | 0.8 | 0.1 |
| 8753 | 146c05 | AV627041 | LCL020c01 |   |   | 18.0  | 19.2  | 25.0  | 1.2 | 0.4 | 0.8 | 0.3 |
| 8754 | 142g02 | AV625389 | LC091h08  |   |   | 46.7  | 40.1  | 48.2  | 1.2 | 0.7 | 0.8 | 0.0 |
| 8755 | 139c02 | AV622911 | LC056d12  |   |   | 4.0   | 3.6   | 4.4   | 0.9 | 0.2 | 0.8 | 0.3 |
| 8756 | 022g07 | AV624228 | LC074g04  |   |   | 17.0  | 17.3  | 21.9  | 1.0 | 0.2 | 0.8 | 0.3 |
| 8757 | 105c11 | AV396310 | CL61f07   |   |   | 7.1   | 5.8   | 6.9   | 0.8 | 0.1 | 0.8 | 0.2 |
| 8758 | 109h06 | AV388635 | CM030h10  |   |   | 128.0 | 123.3 | 147.1 | 1.0 | 0.2 | 0.8 | 0.0 |
| 8759 | 150g12 | AV629178 | LCL053g04 |   |   | 11.0  | 9.1   | 10.8  | 0.8 | 0.2 | 0.8 | 0.3 |
| 8760 | 129c11 | AV642791 | HCL058a03 |   |   | 15.4  | 9.6   | 11.6  | 0.6 | 0.1 | 0.8 | 0.1 |
| 8761 | 142f12 | AV625387 | LC091h05  |   |   | 7.3   | 5.1   | 6.1   | 0.7 | 0.2 | 0.8 | 0.3 |
| 8762 | 156f05 | BP086241 | MX004h02  |   |   | 5.4   | 6.7   | 9.1   | 1.3 | 0.4 | 0.8 | 0.4 |
| 8763 | 027d04 | AV629160 | LCL053d02 |   |   | 21.2  | 17.2  | 20.9  | 0.8 | 0.1 | 0.8 | 0.1 |
| 8764 | 105d11 | AV396503 | CL63e09   |   |   | 9.6   | 9.9   | 12.5  | 1.0 | 0.1 | 0.8 | 0.3 |
| 8765 | 011d02 | AV634754 | HC037e03  |   |   | 5.8   | 5.6   | 7.1   | 1.1 | 0.4 | 0.8 | 0.2 |
| 8766 | 140b11 | AV623686 | LC067c08  |   |   | 18.7  | 18.1  | 22.0  | 1.0 | 0.1 | 0.8 | 0.1 |
| 8767 | 142e09 | AV625246 | LC089h03  |   |   | 13.1  | 9.5   | 11.8  | 0.7 | 0.1 | 0.8 | 0.2 |
| 8768 | 001d12 | AV393936 | CL13h04   |   |   | 5.6   | 5.7   | 7.3   | 1.0 | 0.4 | 0.8 | 0.4 |
| 8769 | 108c06 | AV388175 | CM017f10  |   |   | 170.9 | 202.3 | 245.1 | 1.2 | 0.2 | 0.8 | 0.1 |
| 8770 | 115g04 | AV391493 | CM090h05  |   |   | 73.1  | 52.5  | 64.8  | 0.7 | 0.2 | 0.8 | 0.4 |
| 8771 |        |          |           |   |   |       |       |       |     |     |     |     |

|      | A      | B        | C         | D | E | F     | G    | H     | I   | J   | K   | L   |
|------|--------|----------|-----------|---|---|-------|------|-------|-----|-----|-----|-----|
| 8772 | 019a02 | AV619373 | LC007d11  |   |   | 7.0   | 6.3  | 8.1   | 0.9 | 0.2 | 0.8 | 0.4 |
| 8773 | 171h04 | BP098141 | MXL088a09 |   |   | 69.5  | 41.5 | 96.1  | 0.6 | 0.4 | 0.8 | 0.8 |
| 8774 | 142h11 | AV625525 | LC094b04  |   |   | 22.1  | 14.1 | 17.1  | 0.6 | 0.0 | 0.8 | 0.1 |
| 8775 | 169d03 | BP096932 | MXL067c08 |   |   | 7.1   | 6.0  | 7.2   | 0.8 | 0.2 | 0.8 | 0.2 |
| 8776 | 109c02 | AV388225 | CM024h05  |   |   | 8.8   | 11.4 | 13.9  | 1.3 | 0.2 | 0.8 | 0.2 |
| 8777 | 003e09 | AV396684 | CL67c01   |   |   | 6.2   | 8.9  | 10.9  | 1.4 | 0.2 | 0.8 | 0.1 |
| 8778 | 112a02 | AV391319 | CM053d02  |   |   | 8.2   | 10.2 | 17.0  | 1.3 | 0.4 | 0.8 | 0.4 |
| 8779 | 171d09 | BP097931 | MXL083g02 |   |   | 25.2  | 27.3 | 36.3  | 1.1 | 0.2 | 0.8 | 0.4 |
| 8780 | 006e10 | AV390105 | CM042c11  |   |   | 6.3   | 9.0  | 10.9  | 1.4 | 0.6 | 0.8 | 0.3 |
| 8781 | 032e05 | BP093366 | MXL007d11 |   |   | 26.3  | 20.0 | 24.3  | 0.8 | 0.0 | 0.8 | 0.1 |
| 8782 | 105h09 | AV397033 | CL72c06   |   |   | 9.6   | 8.9  | 11.3  | 0.9 | 0.1 | 0.8 | 0.2 |
| 8783 | 120a07 | BP383704 | HC049c11  |   |   | 23.6  | 24.0 | 30.6  | 1.0 | 0.3 | 0.8 | 0.2 |
| 8784 | 111d09 | AV390688 | CM047c07  |   |   | 11.4  | 9.0  | 11.2  | 0.8 | 0.1 | 0.8 | 0.2 |
| 8785 | 167e11 | BP096113 | MXL052h09 |   |   | 7.9   | 7.4  | 9.1   | 0.9 | 0.2 | 0.8 | 0.2 |
| 8786 | 150f05 | AV629091 | LCL051h04 |   |   | 49.2  | 40.9 | 51.1  | 0.8 | 0.1 | 0.8 | 0.1 |
| 8787 | 003f03 | AV396810 | CL69b03   |   |   | 7.6   | 7.2  | 9.2   | 1.0 | 0.1 | 0.8 | 0.2 |
| 8788 | 168h08 | BP096735 | MXL063h11 |   |   | 5.9   | 4.8  | 6.1   | 0.7 | 0.4 | 0.8 | 0.7 |
| 8789 | 020d10 | AV621036 | LC030c07  |   |   | 11.1  | 6.9  | 8.3   | 0.6 | 0.2 | 0.8 | 0.2 |
| 8790 | 167h04 | BP096227 | MXL054h08 |   |   | 11.6  | 10.2 | 17.8  | 0.7 | 0.4 | 0.8 | 0.9 |
| 8791 | 001g07 | AV394242 | CL22d05   |   |   | 19.0  | 18.5 | 23.0  | 1.1 | 0.3 | 0.8 | 0.2 |
| 8792 | 159e06 | BP087824 | MX044c11  |   |   | 26.9  | 23.5 | 29.0  | 0.9 | 0.2 | 0.8 | 0.2 |
| 8793 | 166f04 | BP095721 | MXL046d05 |   |   | 4.8   | 5.1  | 6.4   | 1.1 | 0.2 | 0.8 | 0.3 |
| 8794 | 162f07 | BP093858 | MXL014g10 |   |   | 10.5  | 9.6  | 12.3  | 0.9 | 0.2 | 0.8 | 0.3 |
| 8795 | 131d04 | AV644075 | HCL081c11 |   |   | 26.9  | 22.9 | 28.3  | 0.9 | 0.1 | 0.8 | 0.1 |
| 8796 | 123a05 | AV639108 | HC095b01  |   |   | 8.6   | 6.6  | 7.9   | 0.8 | 0.1 | 0.8 | 0.1 |
| 8797 | 159h06 | BP088177 | MX053d03  |   |   | 19.6  | 16.7 | 20.2  | 0.8 | 0.3 | 0.8 | 0.3 |
| 8798 | 106b04 | AV397052 | CL75b10   |   |   | 75.3  | 53.5 | 64.7  | 0.8 | 0.3 | 0.8 | 0.2 |
| 8799 | 159h01 | BP088153 | MX052h07  |   |   | 5.5   | 4.5  | 6.5   | 0.8 | 0.3 | 0.8 | 0.6 |
| 8800 | 103d07 | AV395159 | CL36c10   |   |   | 4.0   | 3.6  | 4.5   | 0.9 | 0.2 | 0.8 | 0.2 |
| 8801 | 024f05 | AV626889 | LCL013g06 |   |   | 19.9  | 16.8 | 20.5  | 0.9 | 0.2 | 0.8 | 0.1 |
| 8802 | 119h07 | AV635603 | HC048d07  |   |   | 15.4  | 6.8  | 9.0   | 0.4 | 0.1 | 0.8 | 0.4 |
| 8803 | 165g02 | BP095332 | MXL040a12 |   |   | 7.1   | 5.6  | 8.0   | 0.8 | 0.4 | 0.8 | 0.5 |
| 8804 | 105f02 | AV396760 | CL66c03   |   |   | 30.2  | 20.5 | 25.6  | 0.7 | 0.2 | 0.8 | 0.4 |
| 8805 | 108h07 | AV387868 | CM022g01  |   |   | 17.9  | 12.5 | 16.1  | 0.7 | 0.1 | 0.8 | 0.2 |
| 8806 | 152g06 | AV630106 | LCL073c02 |   |   | 27.5  | 21.7 | 26.3  | 0.8 | 0.2 | 0.8 | 0.0 |
| 8807 | 149h10 | AV628751 | LCL046f01 |   |   | 56.1  | 29.0 | 36.0  | 1.0 | 0.8 | 0.8 | 0.3 |
| 8808 | 101f06 | AV393852 | CL12d08   |   |   | 7.0   | 5.4  | 6.6   | 0.8 | 0.2 | 0.8 | 0.1 |
| 8809 | 127e03 | AV641825 | HCL040h10 |   |   | 4.5   | 4.5  | 5.9   | 1.0 | 0.2 | 0.8 | 0.3 |
| 8810 | 110g10 | AV389829 | CM040c01  |   |   | 10.3  | 6.3  | 7.7   | 0.7 | 0.3 | 0.8 | 0.2 |
| 8811 | 025g03 | AV627754 | LCL031e06 |   |   | 10.6  | 10.6 | 13.3  | 1.0 | 0.2 | 0.8 | 0.2 |
| 8812 | 146g07 | AV627234 | LCL023c09 |   |   | 7.2   | 6.1  | 7.2   | 0.8 | 0.1 | 0.8 | 0.1 |
| 8813 | 126e11 | AV641342 | HCL031h11 |   |   | 13.6  | 12.6 | 15.6  | 0.9 | 0.2 | 0.8 | 0.3 |
| 8814 | 151g03 | AV629636 | LCL062d12 |   |   | 20.4  | 17.7 | 21.5  | 0.9 | 0.1 | 0.8 | 0.1 |
| 8815 | 009h05 | AV393150 | CM100e02  |   |   | 12.8  | 11.6 | 16.0  | 0.9 | 0.2 | 0.8 | 0.4 |
| 8816 | 022c11 | AV623707 | LC067e10  |   |   | 8.2   | 7.8  | 9.5   | 1.0 | 0.2 | 0.8 | 0.1 |
| 8817 | 124h03 | AV640323 | HCL014c08 |   |   | 10.2  | 8.5  | 12.3  | 0.8 | 0.1 | 0.8 | 0.4 |
| 8818 | 168d09 | BP096514 | MXL059h11 |   |   | 6.0   | 5.1  | 6.5   | 0.9 | 0.2 | 0.8 | 0.3 |
| 8819 | 128f06 | AV642459 | HCL052c01 |   |   | 6.5   | 5.3  | 6.7   | 0.8 | 0.1 | 0.8 | 0.2 |
| 8820 | 121b12 | AV636921 | HC066b02  |   |   | 9.0   | 6.5  | 7.9   | 0.7 | 0.1 | 0.8 | 0.1 |
| 8821 | 029d09 | AV630836 | LCL085a01 |   |   | 24.9  | 25.5 | 30.6  | 1.1 | 0.5 | 0.8 | 0.3 |
| 8822 | 144c03 | AV626186 | LCL003h01 |   |   | 35.0  | 27.5 | 34.6  | 0.8 | 0.1 | 0.8 | 0.1 |
| 8823 | 130d01 | AV643398 | HCL068h11 |   |   | 11.2  | 9.1  | 11.5  | 0.8 | 0.2 | 0.8 | 0.2 |
| 8824 | 160g05 | BP089257 | MX203h04  |   |   | 7.7   | 5.7  | 8.8   | 0.8 | 0.5 | 0.8 | 0.7 |
| 8825 | 152f06 | AV630049 | LCL072a04 |   |   | 3.5   | 3.1  | 3.8   | 0.9 | 0.2 | 0.8 | 0.2 |
| 8826 | 111e10 | AV390876 | CM048f02  |   |   | 19.9  | 17.5 | 21.8  | 0.9 | 0.2 | 0.8 | 0.3 |
| 8827 | 169g01 | BP097091 | MXL069h04 |   |   | 29.8  | 30.7 | 39.8  | 1.1 | 0.3 | 0.8 | 0.3 |
| 8828 | 008f01 | AV388700 | CM072b06  |   |   | 14.6  | 15.0 | 18.3  | 1.1 | 0.5 | 0.8 | 0.2 |
| 8829 | 142e06 | AV625225 | LC089e08  |   |   | 11.6  | 11.5 | 14.1  | 1.0 | 0.2 | 0.8 | 0.2 |
| 8830 | 114c08 | AV389386 | CM075c04  |   |   | 6.9   | 5.5  | 7.5   | 0.8 | 0.1 | 0.8 | 0.4 |
| 8831 | 168g06 | BP096682 | MXL063a05 |   |   | 8.1   | 7.5  | 9.2   | 0.9 | 0.6 | 0.8 | 0.7 |
| 8832 | 118a05 | AV633341 | HC019f10  |   |   | 5.3   | 3.9  | 5.0   | 0.8 | 0.2 | 0.8 | 0.3 |
| 8833 | 108a04 | AV387406 | CM014h08  |   |   | 13.8  | 16.2 | 24.0  | 1.2 | 0.2 | 0.8 | 0.5 |
| 8834 | 110g07 | AV389814 | CM039h11  |   |   | 7.0   | 5.6  | 7.4   | 0.8 | 0.1 | 0.8 | 0.3 |
| 8835 | 150f03 | AV629077 | LCL051f01 |   |   | 43.4  | 33.3 | 40.5  | 0.8 | 0.1 | 0.8 | 0.0 |
| 8836 | 009h03 | AV392886 | CM100d05  |   |   | 113.1 | 86.9 | 109.4 | 0.8 | 0.3 | 0.8 | 0.4 |
| 8837 | 113e11 | AV393285 | CM066g12  |   |   | 41.4  | 30.7 | 36.4  | 0.7 | 0.2 | 0.8 | 0.2 |
| 8838 | 127c11 | AV641758 | HCL039h01 |   |   | 6.0   | 6.1  | 7.5   | 1.0 | 0.1 | 0.8 | 0.1 |
| 8839 | 145f01 | AV626762 | LCL015a06 |   |   | 13.8  | 11.6 | 14.6  | 0.9 | 0.3 | 0.8 | 0.3 |
| 8840 | 127e09 | AV641871 | HCL041f07 |   |   | 29.1  | 21.2 | 29.9  | 0.7 | 0.1 | 0.8 | 0.4 |
| 8841 | 153d12 | AV630489 | LCL079f10 |   |   | 62.6  | 42.6 | 53.8  | 0.7 | 0.1 | 0.8 | 0.1 |
| 8842 | 103h08 | AV395565 | CL43b03   |   |   | 35.3  | 28.4 | 38.9  | 0.8 | 0.1 | 0.8 | 0.4 |
| 8843 | 107c08 | AV386768 | CM008f08  |   |   | 10.1  | 8.9  | 10.9  | 0.9 | 0.1 | 0.8 | 0.0 |
| 8844 | 128g09 | AV642550 | HCL053g07 |   |   | 28.0  | 23.8 | 37.7  | 0.9 | 0.2 | 0.8 | 0.5 |
| 8845 | 131h01 | AV644331 | HCL086e01 |   |   | 6.4   | 5.9  | 7.9   | 1.0 | 0.3 | 0.8 | 0.3 |
| 8846 | 155g09 | AV631609 | LCL096h07 |   |   | 11.8  | 7.2  | 9.3   | 0.7 | 0.4 | 0.8 | 0.3 |
| 8847 | 132f10 | AV644793 | HCL093h04 |   |   | 6.7   | 6.7  | 8.2   | 1.0 | 0.4 | 0.8 | 0.2 |
| 8848 | 001c06 | AV393526 | CL08h09   |   |   | 42.6  | 39.3 | 50.5  | 0.9 | 0.2 | 0.8 | 0.5 |
| 8849 | 134e01 | AV619306 | LC006d07  |   |   | 7.4   | 35.7 | 41.7  | 4.8 | 2.3 | 0.8 | 0.2 |
| 8850 | 124g12 | AV640294 | HCL013g12 |   |   | 11.4  | 10.8 | 13.3  | 1.0 | 0.2 | 0.8 | 0.1 |
| 8851 | 019b12 | AV619680 | LC011f10  |   |   | 21.3  | 17.4 | 26.3  | 0.8 | 0.1 | 0.8 | 0.4 |
| 8852 | 149d01 | AV628464 | LCL042c07 |   |   | 19.8  | 14.2 | 18.2  | 0.7 | 0.1 | 0.8 | 0.3 |
| 8853 | 125e07 | AV640677 | HCL020d09 |   |   | 35.4  | 24.7 | 30.1  | 0.7 | 0.0 | 0.8 | 0.0 |
| 8854 | 155g08 | AV631603 | LCL096g12 |   |   | 5.4   | 3.5  | 4.6   | 0.6 | 0.4 | 0.8 | 0.6 |
| 8855 | 143a09 | AV625561 | LC094f05  |   |   | 8.7   | 6.9  | 8.5   | 0.9 | 0.4 | 0.8 | 0.1 |
| 8856 | 124g04 | AV640246 | HCL013a05 |   |   | 15.6  | 12.5 | 15.6  | 0.8 | 0.1 | 0.8 | 0.1 |
| 8857 | 162g03 | BP093899 | MXL015c10 |   |   | 8.4   | 5.5  | 7.3   | 0.7 | 0.2 | 0.8 | 0.4 |
| 8858 | 162h02 | BP093965 | MXL016d01 |   |   | 6.8   | 4.7  | 6.7   | 0.7 | 0.4 | 0.8 | 0.6 |
| 8859 | 149f06 | AV628561 | LCL043g07 |   |   | 12.2  | 10.7 | 13.1  | 0.9 | 0.2 | 0.8 | 0.1 |
| 8860 | 172d08 | BP098366 | MXL092c07 |   |   | 17.4  | 20.8 | 25.6  | 1.2 | 0.2 | 0.8 | 0.2 |
| 8861 | 018g11 | AV619116 | LC004a05  |   |   | 4.1   | 4.6  | 6.1   | 1.1 | 0.1 | 0.8 | 0.6 |
| 8862 | 125g04 | AV640777 | HCL022c05 |   |   | 14.4  | 14.2 | 19.3  | 1.0 | 0.2 | 0.8 | 0.4 |
| 8863 | 021e05 | AV622492 | LC050d08  |   |   | 9.4   | 7.9  | 9.8   | 0.8 | 0.1 | 0.8 | 0.3 |
| 8864 | 152h10 | AV630250 | LCL076b03 |   |   | 16.5  | 10.5 | 13.2  | 0.6 | 0.1 | 0.8 | 0.1 |
| 8865 | 148h08 | AV628240 | LCL039a04 |   |   | 9.6   | 8.4  | 10.3  | 0.9 | 0.2 | 0.8 | 0.3 |
| 8866 | 168g08 | BP096690 | MXL063b08 |   |   | 23.7  | 24.8 | 30.9  | 1.0 | 0.6 | 0.8 | 0.6 |
| 8867 | 027b11 | AV628983 | LCL049h12 |   |   | 25.3  | 18.5 | 26.0  | 0.7 | 0.1 | 0.8 | 0.3 |
| 8868 | 017h07 | AV643954 | HCL079a09 |   |   | 11.6  | 15.3 | 18.8  | 1.3 | 0.2 | 0.8 | 0.0 |
| 8869 | 152d12 | AV629980 | LCL070d06 |   |   | 22.3  | 19.7 | 27.2  | 0.9 | 0.1 | 0.8 | 0.3 |
| 8870 | 129f11 | AV642995 | HCL061h04 |   |   | 10.1  | 7.7  | 10.6  | 0.8 | 0.1 | 0.8 | 0.3 |
| 8871 | 163h06 | BP094548 | MXL024g07 |   |   | 14.2  | 13.1 | 18.3  | 1.0 | 0.5 | 0.8 | 0.4 |
| 8872 | 119a01 | AV634473 | HC033h02  |   |   | 10.0  | 10.1 | 13.5  | 1.0 | 0.1 | 0.8 | 0.3 |
| 8873 | 005a12 | AV387345 | CM019b09  |   |   | 21.3  | 12.9 | 19.1  | 0.6 | 0.2 | 0.8 | 0.5 |
| 8874 | 153h05 | AV630704 | LCL083a01 |   |   | 10.3  | 9.8  | 11.8  | 0.9 | 0.3 | 0.8 | 0.2 |
| 8875 | 150e04 | AV629033 | LCL050g02 |   |   | 14.6  | 13.7 | 16.8  | 1.0 | 0.1 | 0.8 | 0.2 |
| 8876 | 155h11 | AV631656 | LCL097f11 |   |   | 9.3   | 7.7  | 9.3   | 0.8 | 0.3 | 0.8 | 0.4 |
| 8877 | 170d08 | BP097416 | MXL075d02 |   |   | 10.0  | 17.4 | 21.8  | 1.8 | 0.6 | 0.8 | 0.2 |
| 8878 | 012c06 | AV636427 | HC        |   |   |       |      |       |     |     |     |     |

|      | A      | B        | C         | D | E | F     | G     | H     | I   | J   | K   | L   |
|------|--------|----------|-----------|---|---|-------|-------|-------|-----|-----|-----|-----|
| 8879 | 124f02 | AV640202 | HCL012a12 |   |   | 32.9  | 30.4  | 36.5  | 0.9 | 0.1 | 0.8 | 0.1 |
| 8880 | 124b05 | AV640005 | HCL008f06 |   |   | 25.1  | 21.7  | 27.9  | 0.9 | 0.1 | 0.8 | 0.2 |
| 8881 | 143f06 | BP383831 | BP098g04  |   |   | 9.1   | 8.3   | 10.3  | 0.9 | 0.0 | 0.8 | 0.2 |
| 8882 | 005d10 | AV388262 | CM024d11  |   |   | 5.7   | 6.1   | 7.4   | 1.1 | 0.1 | 0.8 | 0.2 |
| 8883 | 154h04 | AV631177 | LCL089h05 |   |   | 27.9  | 21.5  | 26.5  | 0.8 | 0.0 | 0.8 | 0.2 |
| 8884 | 034f08 | BP096129 | MXL053c02 |   |   | 3.9   | 3.2   | 4.1   | 0.8 | 0.1 | 0.8 | 0.2 |
| 8885 | 036a08 | BP097713 | MXL080b04 |   |   | 8.7   | 5.4   | 6.6   | 0.6 | 0.1 | 0.8 | 0.1 |
| 8886 | 026f08 | AV628496 | LCL042g06 |   |   | 11.1  | 9.0   | 11.0  | 0.8 | 0.2 | 0.8 | 0.1 |
| 8887 | 106a02 | AV396964 | CL73e11   |   |   | 5.8   | 5.9   | 8.2   | 1.3 | 0.6 | 0.8 | 0.5 |
| 8888 | 017f05 | AV643490 | HCL070e08 |   |   | 14.3  | 14.6  | 18.9  | 1.0 | 0.1 | 0.8 | 0.2 |
| 8889 | 102c03 | AV394324 | CL20d10   |   |   | 17.2  | 16.6  | 20.9  | 1.0 | 0.1 | 0.8 | 0.1 |
| 8890 | 006f11 | AV390307 | CM045a03  |   |   | 3.5   | 3.1   | 3.9   | 0.9 | 0.0 | 0.8 | 0.4 |
| 8891 | 146d09 | AV627096 | LCL021a10 |   |   | 26.4  | 22.5  | 27.3  | 0.9 | 0.1 | 0.8 | 0.1 |
| 8892 | 123e06 | AV639617 | HCL001h11 |   |   | 8.9   | 7.4   | 9.1   | 0.8 | 0.1 | 0.8 | 0.2 |
| 8893 | 165h06 | BP095387 | MXL041a04 |   |   | 20.5  | 14.7  | 20.3  | 0.7 | 0.4 | 0.8 | 0.7 |
| 8894 | 027d10 | AV629200 | LCL054b02 |   |   | 11.4  | 9.9   | 12.7  | 0.9 | 0.1 | 0.8 | 0.3 |
| 8895 | 016d05 | AV642100 | HCL045f07 |   |   | 7.8   | 11.2  | 13.7  | 1.5 | 0.3 | 0.8 | 0.2 |
| 8896 | 166h05 | BP095801 | MXL047f01 |   |   | 9.4   | 7.5   | 10.2  | 0.7 | 0.4 | 0.8 | 0.7 |
| 8897 | 031f05 | BP087203 | MX028b01  |   |   | 10.2  | 8.5   | 11.0  | 0.9 | 0.2 | 0.8 | 0.3 |
| 8898 | 104f11 | AV395859 | CL52h06   |   |   | 5.2   | 4.7   | 5.8   | 0.9 | 0.2 | 0.8 | 0.1 |
| 8899 | 012e05 | AV636974 | HC066h08  |   |   | 3.5   | 2.2   | 2.7   | 0.6 | 0.1 | 0.8 | 0.1 |
| 8900 | 138e09 | AV622330 | LC048c05  |   |   | 12.1  | 10.5  | 13.6  | 0.9 | 0.2 | 0.8 | 0.2 |
| 8901 | 018d09 | AV644520 | HCL090a04 |   |   | 28.9  | 23.2  | 31.5  | 0.8 | 0.1 | 0.8 | 0.3 |
| 8902 | 113b10 | AV392840 | CM064g02  |   |   | 12.0  | 7.8   | 11.1  | 0.7 | 0.3 | 0.8 | 0.4 |
| 8903 | 008c10 | AV393274 | CM068g06  |   |   | 30.1  | 21.6  | 26.8  | 0.7 | 0.1 | 0.8 | 0.1 |
| 8904 | 163h04 | BP094543 | MXL024f12 |   |   | 8.0   | 6.7   | 9.3   | 0.8 | 0.3 | 0.8 | 0.5 |
| 8905 | 150d09 | AV628995 | LCL050b02 |   |   | 14.5  | 11.7  | 14.4  | 0.8 | 0.1 | 0.8 | 0.0 |
| 8906 | 151d11 | AV629502 | LCL059h08 |   |   | 58.1  | 56.0  | 76.2  | 1.0 | 0.0 | 0.8 | 0.3 |
| 8907 | 030d11 | AV631676 | LCL098a09 |   |   | 1.4   | 1.3   | 1.7   | 1.0 | 0.5 | 0.8 | 0.2 |
| 8908 | 121b07 | AV636880 | HC065e09  |   |   | 6.1   | 4.7   | 5.9   | 0.8 | 0.1 | 0.8 | 0.2 |
| 8909 | 143h08 | AV626042 | LCL001e10 |   |   | 73.4  | 28.9  | 38.8  | 0.4 | 0.1 | 0.8 | 0.5 |
| 8910 | 024b07 | AV626371 | LCL008a03 |   |   | 15.8  | 10.2  | 15.2  | 0.6 | 0.1 | 0.8 | 0.5 |
| 8911 | 124e06 | AV640173 | HCL011f02 |   |   | 12.7  | 8.6   | 11.1  | 0.7 | 0.0 | 0.8 | 0.2 |
| 8912 | 157g08 | BP087149 | MX026g06  |   |   | 5.9   | 7.3   | 9.2   | 1.3 | 1.2 | 0.8 | 0.7 |
| 8913 | 103c02 | AV394964 | CL33c01   |   |   | 11.1  | 11.4  | 14.3  | 1.0 | 0.3 | 0.8 | 0.3 |
| 8914 | 116c12 | AV397563 | CM098f02  |   |   | 14.6  | 11.0  | 14.8  | 0.9 | 0.6 | 0.8 | 0.5 |
| 8915 | 146a08 | AV626977 | LCL019c02 |   |   | 36.6  | 32.5  | 43.7  | 0.9 | 0.1 | 0.8 | 0.3 |
| 8916 | 158d10 | BP087650 | MX040c05  |   |   | 13.4  | 9.5   | 12.3  | 0.8 | 0.2 | 0.8 | 0.3 |
| 8917 | 148e01 | AV628031 | LCL035f12 |   |   | 13.1  | 9.7   | 12.0  | 0.8 | 0.1 | 0.8 | 0.1 |
| 8918 | 019g09 | AV620285 | LC020a10  |   |   | 8.6   | 7.4   | 9.3   | 0.8 | 0.1 | 0.8 | 0.3 |
| 8919 | 012e12 | AV637079 | HC068d07  |   |   | 14.3  | 12.3  | 15.3  | 0.9 | 0.1 | 0.8 | 0.1 |
| 8920 | 107c03 | AV386748 | CM008b04  |   |   | 12.4  | 9.7   | 11.7  | 0.8 | 0.4 | 0.8 | 0.4 |
| 8921 | 016d03 | AV642060 | HCL044h02 |   |   | 27.6  | 25.6  | 31.5  | 0.9 | 0.1 | 0.8 | 0.1 |
| 8922 | 148h05 | AV628229 | LCL038g04 |   |   | 20.0  | 17.2  | 21.6  | 0.9 | 0.1 | 0.8 | 0.1 |
| 8923 | 127c02 | AV641698 | HCL038h07 |   |   | 16.1  | 15.9  | 20.1  | 1.0 | 0.1 | 0.8 | 0.1 |
| 8924 | 149g11 | AV628681 | LCL045e10 |   |   | 15.9  | 17.5  | 20.5  | 1.1 | 0.2 | 0.8 | 0.2 |
| 8925 | 124g02 | AV640241 | HCL012h06 |   |   | 13.1  | 12.8  | 17.2  | 1.0 | 0.1 | 0.8 | 0.3 |
| 8926 | 031e06 | BP086977 | MX021h04  |   |   | 12.1  | 11.9  | 14.7  | 1.0 | 0.1 | 0.8 | 0.1 |
| 8927 | 168d11 | BP096520 | MXL060a08 |   |   | 37.3  | 28.6  | 38.4  | 0.8 | 0.1 | 0.8 | 0.3 |
| 8928 | 004d07 | AV386701 | CM008c01  |   |   | 7.4   | 6.6   | 8.1   | 0.9 | 0.1 | 0.8 | 0.1 |
| 8929 | 114a04 | BP383679 | CM072c04  |   |   | 15.3  | 19.7  | 24.7  | 1.4 | 0.5 | 0.8 | 0.1 |
| 8930 | 129e01 | AV642885 | HCL059h06 |   |   | 21.9  | 19.1  | 23.9  | 0.9 | 0.2 | 0.8 | 0.1 |
| 8931 | 124b03 | AV639979 | HCL008c05 |   |   | 21.5  | 17.9  | 22.6  | 0.8 | 0.1 | 0.8 | 0.1 |
| 8932 | 125f11 | AV640757 | HCL021h06 |   |   | 12.0  | 9.8   | 12.9  | 0.8 | 0.0 | 0.8 | 0.2 |
| 8933 | 140h05 | AV624125 | LC073c08  |   |   | 13.6  | 10.4  | 13.3  | 0.8 | 0.3 | 0.8 | 0.2 |
| 8934 | 169c07 | BP096900 | MXL066g03 |   |   | 11.9  | 10.9  | 13.9  | 0.9 | 0.2 | 0.8 | 0.1 |
| 8935 | 126e10 | AV641341 | HCL031h10 |   |   | 13.4  | 11.1  | 13.7  | 0.8 | 0.0 | 0.8 | 0.1 |
| 8936 | 153g07 | AV630656 | LCL082b12 |   |   | 10.6  | 10.2  | 12.4  | 1.0 | 0.1 | 0.8 | 0.1 |
| 8937 | 108c07 | AV388201 | CM017g02  |   |   | 155.1 | 134.9 | 165.4 | 0.9 | 0.0 | 0.8 | 0.1 |
| 8938 | 112h07 | AV392446 | CM061f08  |   |   | 201.7 | 202.9 | 250.5 | 1.0 | 0.1 | 0.8 | 0.0 |
| 8939 | 164g12 | BP094955 | MXL033c04 |   |   | 18.9  | 30.1  | 37.4  | 1.6 | 0.5 | 0.8 | 0.2 |
| 8940 | 133f07 | AV645148 | HCL098g11 |   |   | 27.1  | 18.8  | 23.2  | 0.7 | 0.1 | 0.8 | 0.0 |
| 8941 | 117g09 | AV633129 | HC017b03  |   |   | 8.5   | 6.7   | 8.7   | 0.8 | 0.2 | 0.8 | 0.3 |
| 8942 | 019b09 | AV619637 | LC011b02  |   |   | 27.7  | 20.1  | 26.4  | 0.7 | 0.3 | 0.8 | 0.5 |
| 8943 | 116h11 | AV632039 | HC003b06  |   |   | 51.6  | 42.8  | 53.0  | 0.8 | 0.2 | 0.8 | 0.1 |
| 8944 | 158g03 | BP098861 | MXL100d02 |   |   | 8.8   | 5.6   | 7.5   | 0.6 | 0.2 | 0.8 | 0.5 |
| 8945 | 165c08 | BP095146 | MXL036e12 |   |   | 19.8  | 38.8  | 47.8  | 2.0 | 0.3 | 0.8 | 0.1 |
| 8946 | 032e06 | BP093379 | MXL007f06 |   |   | 8.3   | 6.9   | 8.8   | 0.8 | 0.1 | 0.8 | 0.3 |
| 8947 | 127f04 | AV641922 | HCL042e03 |   |   | 19.1  | 16.7  | 20.5  | 0.9 | 0.1 | 0.8 | 0.1 |
| 8948 | 145f10 | AV626802 | LCL015f08 |   |   | 72.5  | 33.3  | 45.1  | 0.4 | 0.1 | 0.8 | 0.5 |
| 8949 | 129a08 | AV642650 | HCL055d03 |   |   | 9.2   | 7.9   | 10.1  | 0.9 | 0.1 | 0.8 | 0.2 |
| 8950 | 036g02 | BP098598 | MXL096a12 |   |   | 7.5   | 6.8   | 8.7   | 1.0 | 0.3 | 0.8 | 0.2 |
| 8951 | 129a01 | AV642615 | HCL054g06 |   |   | 17.7  | 14.4  | 18.7  | 0.8 | 0.1 | 0.8 | 0.2 |
| 8952 | 034d09 | BP095744 | MXL046g03 |   |   | 20.5  | 19.0  | 22.7  | 0.9 | 0.3 | 0.8 | 0.1 |
| 8953 | 102e10 | AV394455 | CL24c11   |   |   | 7.6   | 6.6   | 8.3   | 0.9 | 0.3 | 0.8 | 0.1 |
| 8954 | 014b08 | AV639790 | HCL005a12 |   |   | 8.3   | 6.6   | 8.3   | 0.8 | 0.0 | 0.8 | 0.1 |
| 8955 | 014e10 | AV640142 | HCL011b06 |   |   | 14.2  | 12.8  | 16.7  | 0.9 | 0.2 | 0.8 | 0.3 |
| 8956 | 106h06 | AV386642 | CM004b05  |   |   | 114.1 | 94.2  | 115.7 | 0.8 | 0.2 | 0.8 | 0.2 |
| 8957 | 127e05 | AV641844 | HCL041c02 |   |   | 27.4  | 23.9  | 34.5  | 0.9 | 0.1 | 0.8 | 0.4 |
| 8958 | 018e09 | AV618942 | LC001f10  |   |   | 12.7  | 11.2  | 13.6  | 0.9 | 0.4 | 0.8 | 0.3 |
| 8959 | 008d10 | AV387657 | CM069f04  |   |   | 9.6   | 8.3   | 10.2  | 0.9 | 0.2 | 0.8 | 0.1 |
| 8960 | 169d06 | BP096952 | MXL067e12 |   |   | 18.7  | 13.8  | 20.8  | 0.7 | 0.1 | 0.8 | 0.6 |
| 8961 | 172d04 | BP098349 | MXL092a03 |   |   | 19.9  | 19.7  | 26.0  | 1.1 | 0.5 | 0.8 | 0.3 |
| 8962 | 147c06 | AV627447 | LCL026h06 |   |   | 6.4   | 7.2   | 8.9   | 1.1 | 0.1 | 0.8 | 0.1 |
| 8963 | 142b10 | AV624990 | LC085d12  |   |   | 21.1  | 17.8  | 23.1  | 0.8 | 0.1 | 0.8 | 0.3 |
| 8964 | 123f02 | AV639656 | HCL002e08 |   |   | 21.8  | 19.1  | 23.7  | 0.9 | 0.1 | 0.8 | 0.1 |
| 8965 | 146f12 | AV627187 | LCL022d07 |   |   | 8.9   | 6.8   | 8.4   | 0.8 | 0.2 | 0.8 | 0.2 |
| 8966 | 172h02 | BP098555 | MXL095d03 |   |   | 70.9  | 62.6  | 76.7  | 0.9 | 0.1 | 0.8 | 0.1 |
| 8967 | 134c09 | AV619151 | LC004e01  |   |   | 22.1  | 16.6  | 24.0  | 0.7 | 0.1 | 0.8 | 0.4 |
| 8968 | 122g05 | AV638834 | HC091d10  |   |   | 401.7 | 211.2 | 310.8 | 0.5 | 0.2 | 0.8 | 0.5 |
| 8969 | 005b04 | AV387354 | CM019g09  |   |   | 15.3  | 12.2  | 18.1  | 0.8 | 0.2 | 0.8 | 0.4 |
| 8970 | 010c01 | AV632357 | HC007b08  |   |   | 5.1   | 6.7   | 8.5   | 1.3 | 0.1 | 0.8 | 0.2 |
| 8971 | 130g04 | AV643677 | HCL074a05 |   |   | 9.8   | 9.9   | 12.8  | 1.0 | 0.1 | 0.8 | 0.2 |
| 8972 | 167f04 | BP096131 | MXL053c05 |   |   | 36.0  | 19.3  | 23.9  | 0.5 | 0.1 | 0.8 | 0.2 |
| 8973 | 164b01 | BP094633 | MXL026a10 |   |   | 16.3  | 15.3  | 23.8  | 0.9 | 0.2 | 0.8 | 0.6 |
| 8974 | 171e02 | BP097939 | MXL083h02 |   |   | 9.9   | 8.0   | 11.9  | 0.8 | 0.1 | 0.8 | 0.4 |
| 8975 | 157g04 | BP087142 | MX026e10  |   |   | 7.2   | 5.5   | 7.5   | 0.7 | 0.2 | 0.8 | 0.4 |
| 8976 | 126d01 | AV641203 | HCL029f11 |   |   | 9.9   | 8.4   | 10.4  | 0.9 | 0.2 | 0.8 | 0.1 |
| 8977 | 130f02 | AV643589 | HCL072d01 |   |   | 23.5  | 23.3  | 30.8  | 1.0 | 0.0 | 0.8 | 0.3 |
| 8978 | 128e12 | AV642447 | HCL051h07 |   |   | 11.7  | 9.4   | 12.2  | 0.8 | 0.0 | 0.8 | 0.2 |
| 8979 | 036f04 | BP098478 | MXL093h08 |   |   | 10.1  | 10.0  | 14.6  | 1.0 | 0.2 | 0.8 | 0.5 |
| 8980 | 141g05 | AV624722 | LC081f12  |   |   | 6.9   | 5.9   | 7.3   | 0.9 | 0.2 | 0.8 | 0.1 |
| 8981 | 131c01 | AV643957 | HCL079b01 |   |   | 30.6  | 14.9  | 20.6  | 0.5 | 0.2 | 0.8 | 0.5 |
| 8982 | 124c05 | AV640080 | HCL010a03 |   |   | 21.6  | 22.1  | 27.4  | 1.0 | 0.2 | 0.8 | 0.1 |
| 8983 | 118a01 | AV633298 | HC019b05  |   |   | 44.8  | 61.7  | 79.9  | 1.5 | 0.4 | 0.8 | 0.2 |
| 8984 | 029h08 | AV631209 | LCL090c08 |   |   | 12.0  | 8.8   | 11.0  | 0.7 | 0.1 | 0.8 | 0.1 |



|      | A      | B        | C         | D | E | F     | G     | H     | I   | J   | K   | L   |
|------|--------|----------|-----------|---|---|-------|-------|-------|-----|-----|-----|-----|
| 8986 | 144d10 | AV626250 | LCL005b08 |   |   | 6.1   | 5.4   | 6.7   | 0.9 | 0.1 | 0.8 | 0.1 |
| 8987 | 015b07 | AV640737 | HCL021e10 |   |   | 55.1  | 55.5  | 71.0  | 1.0 | 0.2 | 0.8 | 0.1 |
| 8988 | 148g02 | AV628154 | LCL037e09 |   |   | 28.0  | 21.5  | 27.4  | 0.8 | 0.0 | 0.8 | 0.2 |
| 8989 | 016c07 | AV641941 | HCL042g10 |   |   | 5.0   | 6.1   | 7.6   | 1.2 | 0.1 | 0.8 | 0.1 |
| 8990 | 169e09 | BP097023 | MXL068g12 |   |   | 10.6  | 9.8   | 12.3  | 0.9 | 0.1 | 0.8 | 0.1 |
| 8991 | 145h10 | AV626902 | LCL017g03 |   |   | 20.4  | 17.5  | 26.9  | 0.9 | 0.3 | 0.8 | 0.5 |
| 8992 | 107h06 | AV387055 | CM013f03  |   |   | 20.1  | 13.4  | 16.9  | 0.7 | 0.3 | 0.8 | 0.3 |
| 8993 | 013d07 | AV638644 | HC088h11  |   |   | 6.1   | 7.5   | 9.3   | 1.2 | 0.3 | 0.8 | 0.2 |
| 8994 | 003h08 | AV397319 | CL80d04   |   |   | 38.2  | 28.9  | 36.0  | 0.8 | 0.2 | 0.8 | 0.1 |
| 8995 | 167e12 | BP096118 | MXL053a04 |   |   | 20.8  | 17.8  | 23.6  | 0.9 | 0.0 | 0.8 | 0.3 |
| 8996 | 142h08 | AV625516 | LC094a02  |   |   | 6.6   | 4.1   | 5.2   | 0.7 | 0.2 | 0.8 | 0.1 |
| 8997 | 157e03 | BP086952 | MX021b12  |   |   | 7.9   | 9.3   | 12.6  | 1.2 | 0.1 | 0.8 | 0.4 |
| 8998 | 114g05 | AV390549 | CM080e06  |   |   | 111.0 | 131.5 | 164.9 | 1.2 | 0.2 | 0.8 | 0.2 |
| 8999 | 163f03 | BP094393 | MXL022d12 |   |   | 29.1  | 21.2  | 34.5  | 0.7 | 0.2 | 0.8 | 0.5 |
| 9000 | 119h05 | AV635549 | HC047g04  |   |   | 44.8  | 36.5  | 49.0  | 0.8 | 0.1 | 0.8 | 0.2 |
| 9001 | 034c11 | BP095646 | MXL045b06 |   |   | 19.1  | 19.1  | 27.6  | 1.0 | 0.2 | 0.8 | 0.4 |
| 9002 | 025d07 | AV627323 | LCL025a04 |   |   | 19.9  | 14.6  | 18.9  | 0.7 | 0.2 | 0.8 | 0.3 |
| 9003 | 004f05 | AV386890 | CM011g02  |   |   | 8.2   | 9.5   | 14.1  | 1.2 | 0.0 | 0.8 | 0.3 |
| 9004 | 153c09 | AV630440 | LCL078h04 |   |   | 18.5  | 16.0  | 19.9  | 0.9 | 0.2 | 0.8 | 0.0 |
| 9005 | 010e09 | AV632996 | HC015d06  |   |   | 8.0   | 8.8   | 10.9  | 1.1 | 0.2 | 0.8 | 0.2 |
| 9006 | 127d09 | AV641801 | HCL040e02 |   |   | 11.5  | 8.1   | 10.5  | 0.7 | 0.2 | 0.8 | 0.2 |
| 9007 | 019a09 | AV619475 | LC008g12  |   |   | 30.7  | 25.2  | 36.2  | 0.8 | 0.1 | 0.8 | 0.4 |
| 9008 | 035e12 | BP097166 | MXL071b07 |   |   | 24.3  | 18.1  | 22.8  | 0.7 | 0.1 | 0.8 | 0.2 |
| 9009 | 024a07 | AV626287 | LCL005h01 |   |   | 14.3  | 9.2   | 12.3  | 0.7 | 0.1 | 0.8 | 0.3 |
| 9010 | 115f08 | AV391307 | CM090a02  |   |   | 87.7  | 75.1  | 95.5  | 0.8 | 0.1 | 0.8 | 0.3 |
| 9011 | 158g06 | BP087695 | MX041f08  |   |   | 53.1  | 50.6  | 63.4  | 1.0 | 0.2 | 0.8 | 0.1 |
| 9012 | 164g07 | BP094915 | MXL032d06 |   |   | 42.6  | 28.6  | 54.3  | 0.8 | 0.5 | 0.8 | 0.7 |
| 9013 | 135b02 | AV619701 | LC011h12  |   |   | 34.7  | 27.9  | 37.2  | 0.8 | 0.1 | 0.8 | 0.2 |
| 9014 | 126h05 | AV641542 | HCL035h03 |   |   | 21.3  | 18.2  | 27.1  | 0.9 | 0.0 | 0.8 | 0.4 |
| 9015 | 110e06 | AV389447 | CM036g03  |   |   | 61.6  | 33.5  | 42.1  | 0.5 | 0.1 | 0.8 | 0.3 |
| 9016 | 149a06 | AV628300 | LCL039g06 |   |   | 49.2  | 36.9  | 51.6  | 0.8 | 0.2 | 0.8 | 0.3 |
| 9017 | 103c05 | AV394930 | CL34b07   |   |   | 24.8  | 16.0  | 20.0  | 0.7 | 0.3 | 0.8 | 0.1 |
| 9018 | 101g09 | AV393990 | CL15g09   |   |   | 14.4  | 10.9  | 18.8  | 0.8 | 0.1 | 0.8 | 0.5 |
| 9019 | 030f09 | BP086086 | MX001f04  |   |   | 11.7  | 8.6   | 11.4  | 0.7 | 0.1 | 0.8 | 0.4 |
| 9020 | 128d10 | BP383728 | HCL050g03 |   |   | 52.9  | 23.2  | 30.9  | 0.5 | 0.2 | 0.8 | 0.2 |
| 9021 | 151e01 | AV629512 | LCL060b01 |   |   | 31.4  | 24.9  | 34.0  | 0.8 | 0.1 | 0.8 | 0.2 |
| 9022 | 131f10 | AV644248 | HCL084g01 |   |   | 11.1  | 14.6  | 18.3  | 1.3 | 0.2 | 0.8 | 0.1 |
| 9023 | 001g05 | AV394394 | CL21c04   |   |   | 4.1   | 4.5   | 5.7   | 1.3 | 0.8 | 0.8 | 0.3 |
| 9024 | 126e05 | AV641293 | HCL031b10 |   |   | 30.4  | 24.4  | 32.4  | 0.8 | 0.1 | 0.8 | 0.2 |
| 9025 | 129e11 | AV642930 | HCL060g06 |   |   | 15.2  | 12.4  | 16.8  | 0.8 | 0.1 | 0.8 | 0.4 |
| 9026 | 151h02 | AV629705 | LCL064b04 |   |   | 44.8  | 36.2  | 46.4  | 0.8 | 0.1 | 0.8 | 0.1 |
| 9027 | 155h03 | AV631637 | LCL097d03 |   |   | 5.0   | 4.0   | 6.2   | 0.7 | 0.2 | 0.8 | 0.7 |
| 9028 | 028f09 | AV630190 | LCL075a09 |   |   | 16.2  | 12.8  | 15.9  | 0.8 | 0.1 | 0.8 | 0.1 |
| 9029 | 128h12 | AV642612 | HCL054g02 |   |   | 24.4  | 22.0  | 30.2  | 0.9 | 0.0 | 0.8 | 0.4 |
| 9030 | 006f05 | AV390224 | CM044c11  |   |   | 100.7 | 98.7  | 123.3 | 1.0 | 0.0 | 0.8 | 0.1 |
| 9031 | 147c10 | AV627479 | LCL027d02 |   |   | 19.6  | 15.0  | 18.8  | 0.8 | 0.2 | 0.8 | 0.1 |
| 9032 | 151c10 | AV629418 | LCL058d10 |   |   | 10.1  | 8.4   | 10.1  | 0.9 | 0.1 | 0.8 | 0.2 |
| 9033 | 112h06 | AV392399 | CM061d06  |   |   | 11.6  | 11.0  | 14.1  | 1.0 | 0.1 | 0.8 | 0.2 |
| 9034 | 152g12 | AV630168 | LCL074f09 |   |   | 17.6  | 16.0  | 20.8  | 0.9 | 0.2 | 0.8 | 0.3 |
| 9035 | 132c03 | AV644616 | HCL091c08 |   |   | 40.5  | 33.1  | 42.3  | 0.8 | 0.1 | 0.8 | 0.2 |
| 9036 | 172g06 | BP098527 | MXL094g02 |   |   | 5.8   | 3.9   | 6.2   | 0.6 | 0.4 | 0.8 | 0.7 |
| 9037 | 123b07 | AV639336 | HC098a11  |   |   | 7.9   | 6.7   | 8.4   | 0.9 | 0.1 | 0.8 | 0.1 |
| 9038 | 126f04 | AV641370 | HCL032d12 |   |   | 7.0   | 6.5   | 8.5   | 0.9 | 0.1 | 0.8 | 0.2 |
| 9039 | 128f09 | BP383730 | HCL052e06 |   |   | 7.9   | 7.3   | 9.6   | 0.9 | 0.1 | 0.8 | 0.3 |
| 9040 | 117f01 | AV632841 | HC013c08  |   |   | 11.0  | 10.3  | 13.3  | 1.1 | 0.4 | 0.8 | 0.2 |
| 9041 | 018g09 | AV619107 | LC003h03  |   |   | 1.9   | 2.0   | 2.8   | 1.0 | 0.3 | 0.8 | 0.7 |
| 9042 | 007f03 | AV392031 | CM058b03  |   |   | 4.2   | 3.2   | 4.1   | 0.9 | 0.6 | 0.8 | 0.3 |
| 9043 | 155h12 | AV631664 | LCL097h02 |   |   | 16.6  | 12.9  | 17.6  | 0.7 | 0.1 | 0.8 | 0.5 |
| 9044 | 018h10 | AV619276 | LC006a05  |   |   | 4.6   | 5.4   | 6.6   | 1.2 | 0.1 | 0.8 | 0.2 |
| 9045 | 104d07 | AV397750 | CL49d07   |   |   | 5.1   | 4.0   | 5.3   | 0.8 | 0.1 | 0.8 | 0.3 |
| 9046 | 018b06 | AV644203 | HCL083g12 |   |   | 3.7   | 3.3   | 4.2   | 0.9 | 0.3 | 0.8 | 0.1 |
| 9047 | 032g02 | BP093580 | MXL010d11 |   |   | 98.9  | 38.1  | 45.8  | 0.4 | 0.1 | 0.8 | 0.5 |
| 9048 | 165g08 | BP095349 | MXL040c12 |   |   | 23.1  | 16.8  | 23.1  | 0.7 | 0.2 | 0.8 | 0.5 |
| 9049 | 139e04 | AV623129 | LC059c09  |   |   | 10.1  | 8.6   | 11.3  | 0.9 | 0.2 | 0.8 | 0.2 |
| 9050 | 130g03 | AV643663 | HCL073g01 |   |   | 19.7  | 16.3  | 20.6  | 0.9 | 0.1 | 0.8 | 0.1 |
| 9051 | 161h06 | BP093374 | MXL007e08 |   |   | 15.0  | 18.6  | 23.8  | 1.2 | 0.4 | 0.8 | 0.5 |
| 9052 | 163f12 | BP094449 | MXL023b12 |   |   | 13.3  | 9.5   | 12.3  | 0.7 | 0.2 | 0.8 | 0.3 |
| 9053 | 154b09 | AV630844 | LCL085a10 |   |   | 59.7  | 58.7  | 73.9  | 1.0 | 0.2 | 0.8 | 0.0 |
| 9054 | 156h12 | BP086434 | MX008g02  |   |   | 4.6   | 4.7   | 6.4   | 0.9 | 0.3 | 0.8 | 0.6 |
| 9055 | 167d08 | BP096046 | MXL051f08 |   |   | 7.4   | 6.4   | 8.2   | 0.9 | 0.1 | 0.8 | 0.2 |
| 9056 | 145f09 | AV626801 | LCL015f07 |   |   | 11.4  | 9.5   | 12.0  | 0.8 | 0.1 | 0.8 | 0.1 |
| 9057 | 131a06 | AV643827 | HCL076g05 |   |   | 19.0  | 17.0  | 21.9  | 0.9 | 0.0 | 0.8 | 0.2 |
| 9058 | 012g08 | AV637372 | HC072c09  |   |   | 98.4  | 80.0  | 100.9 | 0.8 | 0.1 | 0.8 | 0.1 |
| 9059 | 172g08 | BP098531 | MXL094g09 |   |   | 7.4   | 6.0   | 7.9   | 0.7 | 0.4 | 0.8 | 0.7 |
| 9060 | 107b03 | AV386843 | CM007b11  |   |   | 6.3   | 8.0   | 10.2  | 1.4 | 0.5 | 0.8 | 0.2 |
| 9061 | 128f08 | AV642477 | HCL052e05 |   |   | 9.8   | 7.9   | 10.2  | 0.8 | 0.2 | 0.8 | 0.2 |
| 9062 | 155g10 | AV631612 | LCL096h12 |   |   | 14.7  | 7.3   | 9.5   | 0.5 | 0.2 | 0.8 | 0.3 |
| 9063 | 124a07 | AV639947 | HCL007g04 |   |   | 20.1  | 15.5  | 20.2  | 0.8 | 0.1 | 0.8 | 0.2 |
| 9064 | 116a02 | AV392027 | CM094c01  |   |   | 77.2  | 120.5 | 151.3 | 1.6 | 0.2 | 0.8 | 0.0 |
| 9065 | 128d05 | AV642335 | HCL049h12 |   |   | 14.3  | 13.4  | 17.7  | 0.9 | 0.1 | 0.8 | 0.2 |
| 9066 | 021f09 | AV622694 | LC053b07  |   |   | 6.8   | 6.3   | 8.1   | 1.0 | 0.4 | 0.8 | 0.2 |
| 9067 | 103f06 | AV395339 | CL40b05   |   |   | 9.2   | 6.2   | 7.7   | 0.7 | 0.2 | 0.8 | 0.2 |
| 9068 | 105g03 | AV396956 | CL68c11   |   |   | 120.2 | 107.1 | 131.9 | 0.9 | 0.1 | 0.8 | 0.1 |
| 9069 | 112b04 | AV391474 | CM054b12  |   |   | 339.6 | 257.2 | 331.4 | 0.8 | 0.1 | 0.8 | 0.1 |
| 9070 | 155f02 | AV631482 | LCL094g05 |   |   | 20.3  | 17.4  | 24.2  | 0.9 | 0.2 | 0.8 | 0.5 |
| 9071 | 170f10 | BP097542 | MXL077e05 |   |   | 11.5  | 9.0   | 11.7  | 0.8 | 0.4 | 0.8 | 0.5 |
| 9072 | 035d05 | BP096966 | MXL067h07 |   |   | 11.5  | 8.1   | 10.5  | 0.7 | 0.1 | 0.8 | 0.2 |
| 9073 | 026c11 | AV628265 | LCL039c12 |   |   | 10.6  | 8.0   | 10.4  | 0.8 | 0.2 | 0.8 | 0.3 |
| 9074 | 158g12 | BP087702 | MX041g07  |   |   | 14.1  | 10.7  | 14.3  | 0.8 | 0.3 | 0.8 | 0.3 |
| 9075 | 127b12 | BP098732 | MXL098b08 |   |   | 8.5   | 7.3   | 9.6   | 0.8 | 0.2 | 0.8 | 0.2 |
| 9076 | 156d10 | BP086106 | MX002a04  |   |   | 14.0  | 10.0  | 13.8  | 0.7 | 0.1 | 0.8 | 0.4 |
| 9077 | 152b05 | AV629812 | LCL066e11 |   |   | 8.8   | 6.9   | 8.8   | 0.8 | 0.0 | 0.8 | 0.3 |
| 9078 | 163h02 | BP094532 | MXL024e06 |   |   | 9.3   | 7.1   | 12.7  | 0.7 | 0.2 | 0.8 | 0.7 |
| 9079 | 108a09 | AV387481 | CM016a09  |   |   | 14.6  | 14.5  | 24.3  | 1.0 | 0.2 | 0.8 | 0.4 |
| 9080 | 117e01 | AV632374 | HC007d07  |   |   | 4.2   | 7.7   | 10.4  | 1.9 | 0.2 | 0.8 | 0.2 |
| 9081 | 126c03 | AV641099 | HCL027g07 |   |   | 10.2  | 8.3   | 11.1  | 0.8 | 0.1 | 0.8 | 0.2 |
| 9082 | 035c11 | BP096929 | MXL067c03 |   |   | 40.4  | 26.8  | 35.0  | 0.7 | 0.1 | 0.8 | 0.1 |
| 9083 | 170e10 | BP097471 | MXL076c07 |   |   | 16.8  | 9.2   | 11.5  | 0.5 | 0.0 | 0.8 | 0.2 |
| 9084 | 125e12 | AV640696 | HCL020h04 |   |   | 47.4  | 36.5  | 49.8  | 0.8 | 0.0 | 0.8 | 0.2 |
| 9085 | 169h01 | BP097136 | MXL070f10 |   |   | 9.4   | 6.9   | 10.0  | 0.6 | 0.4 | 0.8 | 0.8 |
| 9086 | 127a07 | AV641613 | HCL037d09 |   |   | 21.2  | 15.4  | 19.4  | 0.7 | 0.1 | 0.8 | 0.1 |
| 9087 | 145f08 | AV626800 | LCL015f06 |   |   | 38.5  | 33.0  | 41.5  | 0.9 | 0.2 | 0.8 | 0.2 |
| 9088 | 110g06 | AV389810 | CM039h10  |   |   | 13.0  | 12.5  | 17.1  | 1.0 | 0.1 | 0.8 | 0.2 |
| 9089 | 165h04 | BP095378 | MXL040h07 |   |   | 6.6   | 4.2   | 8.3   | 0.6 | 0.4 | 0.8 | 0.7 |
| 9090 | 031f07 | BP087210 | MX028b10  |   |   | 109.1 | 55.7  | 70.8  | 0.5 | 0.2 | 0.8 | 0.4 |
| 9091 | 031b10 | BP086613 | MX012h02  |   |   | 34.9  | 19.6  | 25.3  | 0.6 | 0.0 | 0.8 | 0.1 |

|      | A      | B         | C         | D | E | F     | G     | H     | I   | J   | K   | L   |
|------|--------|-----------|-----------|---|---|-------|-------|-------|-----|-----|-----|-----|
| 9093 | 014d07 | AV640020  | HCL008h10 |   |   | 5.6   | 6.7   | 8.9   | 1.2 | 0.0 | 0.8 | 0.2 |
| 9094 | 012e10 | AV637058  | HC068b02  |   |   | 4.6   | 5.2   | 6.9   | 1.2 | 0.3 | 0.8 | 0.4 |
| 9095 | 150f12 | AV629127  | LCL052f08 |   |   | 24.6  | 18.1  | 25.5  | 0.8 | 0.1 | 0.8 | 0.3 |
| 9096 | 002b08 | AV394854  | CL32f04   |   |   | 12.6  | 15.0  | 20.9  | 1.2 | 0.2 | 0.8 | 0.3 |
| 9097 | 145f12 | AV626821  | LCL016a05 |   |   | 12.2  | 10.6  | 16.2  | 0.9 | 0.2 | 0.8 | 0.4 |
| 9098 | 161e09 | BP093214  | MXL005a10 |   |   | 20.9  | 13.0  | 16.7  | 0.6 | 0.2 | 0.8 | 0.2 |
| 9099 | 113h06 | AV388529  | CM071f01  |   |   | 14.3  | 11.1  | 14.7  | 0.8 | 0.2 | 0.8 | 0.4 |
| 9100 | 014c07 | AV639889  | HCL006g02 |   |   | 6.5   | 6.5   | 8.3   | 1.0 | 0.0 | 0.8 | 0.1 |
| 9101 | 128b08 | AV642210  | HCL047e03 |   |   | 9.1   | 8.2   | 10.4  | 0.9 | 0.2 | 0.8 | 0.1 |
| 9102 | 143h06 | AV626027  | LCL001c03 |   |   | 8.0   | 7.4   | 9.3   | 0.9 | 0.2 | 0.8 | 0.0 |
| 9103 | 107d03 | AV397659  | CM009c05  |   |   | 74.9  | 62.7  | 85.7  | 0.8 | 0.1 | 0.8 | 0.3 |
| 9104 | 101e06 | AV393680  | CL10d09   |   |   | 9.1   | 8.2   | 10.8  | 0.9 | 0.2 | 0.8 | 0.2 |
| 9105 | 126c05 | AV641118  | HCL028a09 |   |   | 9.0   | 9.0   | 11.5  | 1.0 | 0.2 | 0.8 | 0.2 |
| 9106 | 150h05 | AV629218  | LCL054f05 |   |   | 10.0  | 7.2   | 9.1   | 0.7 | 0.1 | 0.8 | 0.1 |
| 9107 | 171g03 | BP098057  | MXL086b12 |   |   | 11.0  | 7.9   | 10.5  | 0.7 | 0.0 | 0.8 | 0.5 |
| 9108 | 012f11 | AV637267  | HC070h05  |   |   | 11.6  | 8.5   | 11.0  | 0.7 | 0.1 | 0.8 | 0.2 |
| 9109 | 118f05 | AV634015  | HC028b05  |   |   | 51.4  | 47.6  | 61.7  | 0.9 | 0.2 | 0.8 | 0.2 |
| 9110 | 103h05 | AV395451  | CL42g02   |   |   | 33.5  | 22.0  | 27.6  | 0.7 | 0.4 | 0.8 | 0.1 |
| 9111 | 168c08 | BP096393  | MXL058a11 |   |   | 9.4   | 14.5  | 19.2  | 1.6 | 0.2 | 0.8 | 0.3 |
| 9112 | 140e01 | AV623846  | LCL069e02 |   |   | 28.4  | 20.8  | 26.8  | 0.8 | 0.1 | 0.8 | 0.1 |
| 9113 | 001b07 | AV393569  | CL05g04   |   |   | 23.0  | 29.0  | 37.3  | 1.3 | 0.1 | 0.8 | 0.2 |
| 9114 | 003b06 | AV396034  | CL55e03   |   |   | 17.1  | 14.9  | 20.8  | 0.9 | 0.2 | 0.8 | 0.3 |
| 9115 | 126a10 | AV641005  | HCL026a10 |   |   | 23.9  | 19.1  | 25.1  | 0.8 | 0.1 | 0.8 | 0.2 |
| 9116 | 150g01 | AV629129  | LCL052g01 |   |   | 22.7  | 19.3  | 24.6  | 0.8 | 0.1 | 0.8 | 0.2 |
| 9117 | 005e07 | AV388127  | CM025h07  |   |   | 43.9  | 27.2  | 34.2  | 0.6 | 0.2 | 0.8 | 0.4 |
| 9118 | 156h11 | BP086432  | MX008f12  |   |   | 3.4   | 3.1   | 4.3   | 0.9 | 0.4 | 0.8 | 0.5 |
| 9119 | 020f12 | AV621365  | LC035a08  |   |   | 20.1  | 26.5  | 35.2  | 1.3 | 0.2 | 0.8 | 0.3 |
| 9120 | 033e09 | BP094509  | MXL024b12 |   |   | 19.6  | 13.7  | 17.4  | 0.7 | 0.1 | 0.8 | 0.1 |
| 9121 | 150c08 | AV628936  | LCL049c02 |   |   | 18.4  | 15.4  | 20.1  | 0.8 | 0.1 | 0.8 | 0.1 |
| 9122 | 162e06 | BP093768  | MXL013e01 |   |   | 17.8  | 13.4  | 17.4  | 0.8 | 0.1 | 0.8 | 0.2 |
| 9123 | 027b08 | AV628965  | LCL049f08 |   |   | 31.1  | 24.1  | 33.4  | 0.8 | 0.1 | 0.8 | 0.3 |
| 9124 | 172c04 | BP098291  | MXL090h11 |   |   | 18.1  | 15.2  | 19.3  | 0.8 | 0.1 | 0.8 | 0.3 |
| 9125 | 162f11 | BP093883  | MXL015b03 |   |   | 11.5  | 9.6   | 12.6  | 0.9 | 0.3 | 0.8 | 0.3 |
| 9126 | 143g10 | AV625966  | LC100d10  |   |   | 8.6   | 6.1   | 8.1   | 0.7 | 0.1 | 0.8 | 0.2 |
| 9127 | 150h11 | AV629277  | LCL055g07 |   |   | 5.4   | 4.9   | 6.3   | 0.9 | 0.3 | 0.8 | 0.2 |
| 9128 | 164h07 | BP094978  | MXL033g04 |   |   | 45.3  | 31.7  | 39.8  | 0.7 | 0.2 | 0.8 | 0.1 |
| 9129 | 129b04 | AV642689  | HCL056b02 |   |   | 14.3  | 12.6  | 16.4  | 0.9 | 0.1 | 0.8 | 0.2 |
| 9130 | 132h10 | AV644869  | HCL094h05 |   |   | 18.5  | 16.7  | 23.3  | 0.9 | 0.1 | 0.8 | 0.3 |
| 9131 | 105h06 | AV396894  | CL71e11   |   |   | 17.8  | 14.8  | 20.1  | 0.8 | 0.1 | 0.8 | 0.3 |
| 9132 | 013c06 | AV638299  | HC084e11  |   |   | 33.2  | 22.7  | 28.7  | 0.7 | 0.1 | 0.8 | 0.1 |
| 9133 | 006d11 | AV389984  | CM041b10  |   |   | 3.6   | 3.7   | 4.7   | 1.2 | 0.6 | 0.8 | 0.3 |
| 9134 | 159f08 | BP087986  | MX048f08  |   |   | 15.4  | 13.7  | 20.6  | 0.9 | 0.3 | 0.8 | 0.4 |
| 9135 | 027g10 | AV629437  | LCL058g04 |   |   | 15.5  | 16.4  | 21.3  | 1.1 | 0.1 | 0.8 | 0.3 |
| 9136 | 146c03 | AV627039  | LCL020b11 |   |   | 11.9  | 10.6  | 13.4  | 0.9 | 0.3 | 0.8 | 0.1 |
| 9137 | 128f03 | AV642454  | HCL052b05 |   |   | 21.2  | 21.2  | 27.0  | 1.0 | 0.1 | 0.8 | 0.0 |
| 9138 | 146f01 | AV627157  | LCL022a03 |   |   | 12.4  | 9.6   | 12.3  | 0.8 | 0.1 | 0.8 | 0.1 |
| 9139 | 170e07 | BP097454  | MXL076a02 |   |   | 15.0  | 9.9   | 12.9  | 0.7 | 0.1 | 0.8 | 0.1 |
| 9140 | 112g04 | AV392286  | CM060e01  |   |   | 16.0  | 15.5  | 19.8  | 1.0 | 0.3 | 0.8 | 0.3 |
| 9141 | 014d04 | AV639996  | HCL008e01 |   |   | 36.9  | 40.1  | 52.6  | 1.1 | 0.1 | 0.8 | 0.1 |
| 9142 | 151g05 | AV629647  | LCL062f04 |   |   | 12.6  | 11.9  | 15.1  | 0.9 | 0.1 | 0.8 | 0.0 |
| 9143 | 128d04 | AV642333  | HCL049h09 |   |   | 12.8  | 10.9  | 13.9  | 0.9 | 0.2 | 0.8 | 0.1 |
| 9144 | 129c01 | BP098748  | MXL098e01 |   |   | 11.5  | 9.3   | 12.2  | 0.8 | 0.2 | 0.8 | 0.2 |
| 9145 | 110b09 | AV388954  | CM033h08  |   |   | 4.1   | 4.1   | 6.2   | 1.0 | 0.1 | 0.8 | 0.3 |
| 9146 | 107f05 | AV386880  | CM011c01  |   |   | 22.5  | 17.8  | 21.6  | 0.8 | 0.3 | 0.8 | 0.2 |
| 9147 | 133d01 | AV645026  | HCL097b07 |   |   | 49.5  | 32.4  | 41.7  | 0.7 | 0.2 | 0.8 | 0.1 |
| 9148 | 162e10 | BP093819  | MXL014c06 |   |   | 20.6  | 14.3  | 18.0  | 0.7 | 0.1 | 0.8 | 0.0 |
| 9149 | 023c06 | AV624876  | LCL083h12 |   |   | 60.4  | 37.8  | 49.3  | 0.6 | 0.0 | 0.8 | 0.2 |
| 9150 | 108e07 | AV397435  | CM020c01  |   |   | 46.8  | 27.6  | 36.7  | 0.6 | 0.3 | 0.8 | 0.4 |
| 9151 | 003e11 | AV396687  | CL67h05   |   |   | 39.0  | 32.0  | 40.2  | 0.8 | 0.2 | 0.8 | 0.2 |
| 9152 | 151h12 | AV629736  | LCL065a02 |   |   | 57.6  | 45.2  | 65.2  | 0.8 | 0.2 | 0.8 | 0.3 |
| 9153 | 135f10 | AV620127  | LC017h10  |   |   | 35.9  | 34.9  | 44.3  | 1.1 | 0.5 | 0.8 | 0.1 |
| 9154 | 035c06 | BP096821  | MXL065d10 |   |   | 22.9  | 17.9  | 23.2  | 0.8 | 0.1 | 0.8 | 0.3 |
| 9155 | 135d08 | AV619944  | LC015d03  |   |   | 29.9  | 23.8  | 32.8  | 0.8 | 0.1 | 0.8 | 0.2 |
| 9156 | 148h02 | AV628221  | LCL038f07 |   |   | 18.2  | 13.9  | 17.7  | 0.8 | 0.1 | 0.8 | 0.1 |
| 9157 | 005e08 | AV388078  | CM025h09  |   |   | 11.1  | 7.6   | 10.0  | 0.7 | 0.2 | 0.8 | 0.2 |
| 9158 | 129e08 | AV642918  | HCL060d11 |   |   | 14.0  | 10.9  | 13.9  | 0.8 | 0.1 | 0.8 | 0.2 |
| 9159 | 009d09 | AV391426  | CM091f05  |   |   | 5.0   | 6.9   | 8.8   | 1.5 | 0.4 | 0.8 | 0.0 |
| 9160 | 162d09 | BP093711  | MXL012d07 |   |   | 14.2  | 11.9  | 17.6  | 0.8 | 0.2 | 0.8 | 0.5 |
| 9161 | 131b10 | AV643931  | HCL078f05 |   |   | 15.0  | 12.8  | 16.9  | 0.9 | 0.1 | 0.8 | 0.2 |
| 9162 | 014c05 | AV639883  | HCL006f05 |   |   | 19.2  | 16.6  | 26.1  | 0.9 | 0.3 | 0.8 | 0.5 |
| 9163 | 024b09 | AV626378  | LCL008b03 |   |   | 9.6   | 7.6   | 10.3  | 0.8 | 0.0 | 0.8 | 0.3 |
| 9164 | 127b04 | AV641655  | HCL038c02 |   |   | 8.5   | 7.8   | 10.0  | 0.9 | 0.1 | 0.8 | 0.0 |
| 9165 | 137h06 | AV621943  | LC042h10  |   |   | 3.0   | 2.2   | 2.9   | 0.8 | 0.2 | 0.8 | 0.3 |
| 9166 | 120d02 | AV635984  | HC053f08  |   |   | 9.2   | 8.3   | 11.0  | 0.9 | 0.2 | 0.8 | 0.2 |
| 9167 | 163e03 | BP094306  | MXL020h10 |   |   | 9.8   | 7.6   | 12.0  | 0.8 | 0.2 | 0.8 | 0.4 |
| 9168 | 128f04 | AV642456  | HCL052b07 |   |   | 8.2   | 8.8   | 11.3  | 1.1 | 0.2 | 0.8 | 0.1 |
| 9169 | 125a06 | AV640397  | HCL015e12 |   |   | 15.5  | 12.9  | 17.5  | 0.8 | 0.0 | 0.8 | 0.3 |
| 9170 | 015a05 | AV640657  | HCL020a05 |   |   | 14.6  | 17.6  | 25.5  | 1.2 | 0.2 | 0.8 | 0.3 |
| 9171 | 129h09 | AV643133  | HCL064c12 |   |   | 23.4  | 19.2  | 32.1  | 0.8 | 0.1 | 0.8 | 0.5 |
| 9172 | 116a05 | AV392012  | CM094c08  |   |   | 31.4  | 20.8  | 25.5  | 0.6 | 0.2 | 0.8 | 0.2 |
| 9173 | 106e07 | AV3986499 | CM001e02  |   |   | 15.4  | 15.9  | 19.7  | 1.0 | 0.1 | 0.8 | 0.2 |
| 9174 | 166e09 | BP095695  | MXL045h12 |   |   | 159.4 | 148.4 | 205.9 | 1.0 | 0.2 | 0.8 | 0.3 |
| 9175 | 154h09 | BP098838  | MXL100a06 |   |   | 17.2  | 12.6  | 16.1  | 0.7 | 0.1 | 0.8 | 0.1 |
| 9176 | 125f07 | AV640740  | HCL021f05 |   |   | 9.3   | 6.7   | 8.9   | 0.7 | 0.1 | 0.8 | 0.3 |
| 9177 | 160d01 | BP088556  | MX063d01  |   |   | 28.0  | 15.3  | 21.0  | 0.6 | 0.1 | 0.8 | 0.2 |
| 9178 | 123b08 | AV639341  | HC098b05  |   |   | 6.4   | 5.5   | 7.1   | 0.9 | 0.1 | 0.8 | 0.1 |
| 9179 | 163f04 | BP094402  | MXL022e11 |   |   | 16.0  | 16.4  | 21.1  | 1.0 | 0.1 | 0.8 | 0.1 |
| 9180 | 168f06 | BP096635  | MXL062b06 |   |   | 7.4   | 6.0   | 7.7   | 0.8 | 0.3 | 0.8 | 0.3 |
| 9181 | 016g09 | AV642558  | HCL053h04 |   |   | 3.0   | 4.3   | 5.3   | 1.4 | 0.3 | 0.8 | 0.2 |
| 9182 | 150g09 | AV629153  | LCL053b07 |   |   | 5.9   | 4.6   | 5.9   | 0.8 | 0.2 | 0.8 | 0.1 |
| 9183 | 163f09 | BP094441  | MXL023b01 |   |   | 21.6  | 21.0  | 28.1  | 1.0 | 0.1 | 0.8 | 0.1 |
| 9184 | 160g04 | BP089240  | MX203e10  |   |   | 12.0  | 9.8   | 13.0  | 0.8 | 0.3 | 0.8 | 0.4 |
| 9185 | 165d03 | BP095176  | MXL037b08 |   |   | 20.3  | 16.3  | 21.7  | 0.8 | 0.1 | 0.8 | 0.1 |
| 9186 | 153c02 | AV630386  | LCL078b03 |   |   | 82.4  | 66.6  | 95.2  | 0.8 | 0.2 | 0.8 | 0.3 |
| 9187 | 009b10 | AV390736  | CM085a12  |   |   | 11.0  | 7.6   | 10.2  | 0.7 | 0.1 | 0.8 | 0.2 |
| 9188 | 128g12 | AV642562  | HCL053h09 |   |   | 25.1  | 21.0  | 28.5  | 0.8 | 0.1 | 0.8 | 0.3 |
| 9189 | 151h08 | AV629728  | LCL064g06 |   |   | 6.8   | 6.0   | 8.3   | 0.9 | 0.3 | 0.8 | 0.4 |
| 9190 | 169f03 | BP097052  | MXL069c04 |   |   | 26.7  | 21.0  | 32.0  | 0.8 | 0.2 | 0.8 | 0.4 |
| 9191 | 150c04 | AV628929  | LCL049b04 |   |   | 40.6  | 29.6  | 41.9  | 0.8 | 0.2 | 0.8 | 0.3 |
| 9192 | 103e07 | AV395295  | CL38b05   |   |   | 9.2   | 7.6   | 9.7   | 0.8 | 0.2 | 0.8 | 0.3 |
| 9193 | 108e04 | AV397505  | CM020a03  |   |   | 50.7  | 40.2  | 51.8  | 0.8 | 0.1 | 0.8 | 0.0 |
| 9194 | 159f06 | BP087972  | MX048c11  |   |   | 11.1  | 10.5  | 14.3  | 1.0 | 0.4 | 0.8 | 0.2 |
| 9195 | 165g04 | BP095337  | MXL040b07 |   |   | 12.7  | 8.9   | 12.2  | 0.7 | 0.2 | 0.8 | 0.4 |
| 9196 | 154e11 | AV631013  | LCL087f04 |   |   | 12.3  | 9.8   | 12.5  | 0.8 | 0.1 | 0.8 | 0.2 |
| 9197 | 145e03 | AV626717  | LCL014c01 |   |   | 31.3  | 28.2  | 38.0  | 0.9 | 0.2 | 0.8 | 0.2 |
| 9198 | 015c05 | AV640880  | HCL024a07 |   |   | 49.4  | 41.3  | 59.3  | 0.9 | 0.1 | 0.8 |     |

|      | A      | B        | C         | D | E | F     | G     | H     | I   | J   | K   | L   |
|------|--------|----------|-----------|---|---|-------|-------|-------|-----|-----|-----|-----|
| 9200 | 148e10 | AV628077 | LCL036d02 |   |   | 13.4  | 14.7  | 18.9  | 1.2 | 0.5 | 0.8 | 0.1 |
| 9201 | 130c08 | AV643341 | HCL067h07 |   |   | 17.0  | 8.6   | 11.0  | 0.5 | 0.1 | 0.8 | 0.2 |
| 9202 | 014e08 | AV640126 | HCL010g12 |   |   | 6.6   | 5.6   | 7.3   | 0.9 | 0.3 | 0.8 | 0.3 |
| 9203 | 017d07 | AV643209 | HCL065f08 |   |   | 18.5  | 23.6  | 31.1  | 1.3 | 0.0 | 0.8 | 0.2 |
| 9204 | 033f08 | BP094693 | MXL027f01 |   |   | 7.3   | 5.7   | 7.2   | 0.8 | 0.1 | 0.8 | 0.2 |
| 9205 | 015b01 | AV640724 | HCL021c12 |   |   | 24.7  | 26.2  | 44.0  | 1.3 | 0.5 | 0.8 | 0.4 |
| 9206 | 141h01 | AV624780 | LC082f04  |   |   | 7.0   | 4.9   | 6.3   | 0.7 | 0.2 | 0.8 | 0.1 |
| 9207 | 128d01 | AV642305 | HCL049d08 |   |   | 25.0  | 8.9   | 12.3  | 0.4 | 0.0 | 0.8 | 0.4 |
| 9208 | 145h05 | AV626887 | LCL017d10 |   |   | 7.4   | 5.7   | 7.3   | 0.8 | 0.1 | 0.8 | 0.1 |
| 9209 | 150e07 | AV629045 | LCL050h05 |   |   | 24.6  | 19.0  | 26.1  | 0.8 | 0.1 | 0.8 | 0.2 |
| 9210 | 128h10 | AV642610 | HCL054f10 |   |   | 26.2  | 22.4  | 34.9  | 0.9 | 0.1 | 0.8 | 0.4 |
| 9211 | 123g08 | AV639796 | HCL005b08 |   |   | 12.4  | 10.8  | 14.0  | 0.9 | 0.0 | 0.8 | 0.2 |
| 9212 | 030b11 | AV631459 | LCL094d10 |   |   | 6.2   | 2.1   | 2.6   | 0.3 | 0.2 | 0.8 | 0.1 |
| 9213 | 152b12 | AV629836 | LCL067c01 |   |   | 31.7  | 24.9  | 34.6  | 0.8 | 0.0 | 0.8 | 0.3 |
| 9214 | 165h01 | BP095356 | MXL040e05 |   |   | 9.7   | 8.9   | 16.7  | 0.8 | 0.6 | 0.8 | 0.8 |
| 9215 | 169f02 | BP097050 | MXL069c02 |   |   | 16.7  | 13.5  | 21.0  | 0.8 | 0.4 | 0.8 | 0.6 |
| 9216 | 123f01 | AV639650 | HCL002d08 |   |   | 20.8  | 17.8  | 23.0  | 0.9 | 0.1 | 0.8 | 0.0 |
| 9217 | 013b02 | AV637999 | HC080d11  |   |   | 11.9  | 11.9  | 16.3  | 1.0 | 0.3 | 0.8 | 0.2 |
| 9218 | 167d03 | BP096010 | MXL051a05 |   |   | 25.9  | 19.7  | 25.7  | 0.8 | 0.1 | 0.8 | 0.2 |
| 9219 | 113h09 | AV388452 | CM071g08  |   |   | 174.9 | 184.5 | 236.4 | 1.1 | 0.2 | 0.8 | 0.1 |
| 9220 | 026g11 | AV628563 | LCL043g09 |   |   | 3.0   | 2.2   | 2.9   | 0.7 | 0.1 | 0.8 | 0.3 |
| 9221 | 128h05 | AV642578 | HCL054b08 |   |   | 11.2  | 10.8  | 16.4  | 1.0 | 0.2 | 0.8 | 0.4 |
| 9222 | 156f06 | BP086249 | MX005a02  |   |   | 5.7   | 5.3   | 7.5   | 1.0 | 0.3 | 0.8 | 0.3 |
| 9223 | 143c01 | AV625633 | LC095g01  |   |   | 5.7   | 4.5   | 5.8   | 0.8 | 0.1 | 0.8 | 0.1 |
| 9224 | 031d02 | BP086787 | MX016g07  |   |   | 6.4   | 7.5   | 9.8   | 1.2 | 0.1 | 0.8 | 0.2 |
| 9225 | 165h11 | BP095400 | MXL041c04 |   |   | 4.1   | 4.4   | 7.8   | 1.0 | 0.4 | 0.8 | 0.7 |
| 9226 | 167h11 | BP096255 | MXL055e04 |   |   | 3.9   | 3.4   | 5.4   | 0.9 | 0.4 | 0.8 | 0.6 |
| 9227 | 110f06 | AV389654 | CM038g08  |   |   | 29.1  | 17.7  | 22.5  | 0.6 | 0.2 | 0.8 | 0.1 |
| 9228 | 169h12 | BP097191 | MXL071e08 |   |   | 5.5   | 4.6   | 7.0   | 0.8 | 0.2 | 0.8 | 0.6 |
| 9229 | 144h03 | AV626421 | LCL008g08 |   |   | 62.2  | 46.9  | 66.0  | 0.8 | 0.0 | 0.8 | 0.2 |
| 9230 | 152e05 | AV630011 | LCL071a01 |   |   | 25.7  | 20.8  | 26.5  | 0.9 | 0.2 | 0.8 | 0.1 |
| 9231 | 102d07 | AV394273 | CL22b10   |   |   | 7.3   | 5.9   | 7.7   | 0.9 | 0.3 | 0.8 | 0.1 |
| 9232 | 161h12 | BP093394 | MXL007g10 |   |   | 14.8  | 11.5  | 14.9  | 0.7 | 0.2 | 0.8 | 0.5 |
| 9233 | 012g11 | AV637421 | HC073a01  |   |   | 50.1  | 27.9  | 42.9  | 0.6 | 0.3 | 0.8 | 0.6 |
| 9234 | 015f09 | AV641307 | HCL031d06 |   |   | 3.9   | 4.8   | 6.1   | 1.2 | 0.6 | 0.8 | 0.4 |
| 9235 | 145a08 | AV626470 | LCL009f08 |   |   | 19.5  | 14.7  | 19.0  | 0.8 | 0.1 | 0.8 | 0.0 |
| 9236 | 019h04 | AV620332 | LC020f11  |   |   | 12.2  | 8.4   | 12.2  | 0.7 | 0.3 | 0.8 | 0.4 |
| 9237 | 147b06 | AV627407 | LCL026c08 |   |   | 7.8   | 5.4   | 7.1   | 0.7 | 0.2 | 0.8 | 0.1 |
| 9238 | 161c08 | BP093046 | MXL002f02 |   |   | 8.9   | 10.1  | 13.9  | 1.1 | 0.2 | 0.8 | 0.1 |
| 9239 | 110a01 | AV388710 | CM031e06  |   |   | 4.6   | 8.0   | 11.1  | 1.9 | 0.6 | 0.8 | 0.3 |
| 9240 | 126a01 | AV640898 | HCL024d01 |   |   | 13.0  | 10.0  | 13.2  | 0.8 | 0.1 | 0.8 | 0.2 |
| 9241 | 105b03 | AV396202 | CL58b06   |   |   | 10.8  | 13.6  | 17.6  | 1.4 | 0.5 | 0.8 | 0.1 |
| 9242 | 154g05 | AV631123 | LCL089c01 |   |   | 18.7  | 16.3  | 20.8  | 0.9 | 0.0 | 0.8 | 0.0 |
| 9243 | 168d10 | BP096517 | MXL060a03 |   |   | 17.2  | 12.9  | 16.6  | 0.8 | 0.1 | 0.8 | 0.1 |
| 9244 | 118f10 | AV634058 | HC028f11  |   |   | 6.2   | 4.8   | 6.3   | 0.8 | 0.0 | 0.8 | 0.2 |
| 9245 | 165h05 | BP095382 | MXL040h11 |   |   | 4.1   | 3.1   | 4.2   | 0.8 | 0.6 | 0.8 | 0.6 |
| 9246 | 115a12 | AV390367 | CM084a01  |   |   | 52.5  | 36.6  | 48.2  | 0.8 | 0.4 | 0.8 | 0.2 |
| 9247 | 121b04 | AV636855 | HC065b08  |   |   | 22.4  | 19.0  | 27.6  | 0.9 | 0.2 | 0.8 | 0.3 |
| 9248 | 119f10 | AV635290 | HC044d10  |   |   | 12.3  | 9.6   | 13.5  | 0.8 | 0.3 | 0.8 | 0.3 |
| 9249 | 169h04 | BP097148 | MXL070h06 |   |   | 72.7  | 53.6  | 68.9  | 0.7 | 0.2 | 0.8 | 0.3 |
| 9250 | 170h11 | BP097664 | MXL079c05 |   |   | 7.2   | 6.4   | 11.0  | 0.9 | 0.6 | 0.8 | 0.6 |
| 9251 | 107b07 | AV386818 | CM007d06  |   |   | 17.6  | 13.8  | 17.6  | 0.8 | 0.0 | 0.8 | 0.1 |
| 9252 | 133e06 | AV645079 | HCL098a02 |   |   | 12.6  | 11.7  | 15.5  | 0.9 | 0.1 | 0.8 | 0.1 |
| 9253 | 126g04 | AV641448 | HCL033g11 |   |   | 22.0  | 17.9  | 23.9  | 0.8 | 0.1 | 0.8 | 0.2 |
| 9254 | 146d05 | AV627082 | LCL020g10 |   |   | 24.4  | 24.3  | 33.9  | 1.2 | 0.5 | 0.8 | 0.2 |
| 9255 | 148f01 | AV628093 | LCL036e12 |   |   | 143.7 | 116.5 | 158.7 | 0.8 | 0.0 | 0.8 | 0.2 |
| 9256 | 007e10 | AV391916 | CM057d06  |   |   | 82.7  | 53.8  | 69.7  | 0.7 | 0.0 | 0.8 | 0.1 |
| 9257 | 125c06 | AV640523 | HCL017g08 |   |   | 18.1  | 18.5  | 24.1  | 1.0 | 0.2 | 0.8 | 0.1 |
| 9258 | 147g04 | AV627670 | LCL030c12 |   |   | 27.4  | 22.6  | 31.0  | 0.8 | 0.1 | 0.8 | 0.2 |
| 9259 | 122a05 | AV637784 | HC077d12  |   |   | 14.3  | 13.0  | 18.2  | 0.9 | 0.1 | 0.8 | 0.2 |
| 9260 | 150d08 | AV628993 | LCL050a12 |   |   | 20.0  | 17.4  | 25.8  | 0.9 | 0.1 | 0.8 | 0.3 |
| 9261 | 148e02 | AV628032 | LCL035g02 |   |   | 22.4  | 15.0  | 20.2  | 0.7 | 0.1 | 0.8 | 0.3 |
| 9262 | 018g06 | AV619091 | LC003f08  |   |   | 10.8  | 15.2  | 19.3  | 1.4 | 0.3 | 0.8 | 0.5 |
| 9263 | 026e12 | AV628439 | LCL041h04 |   |   | 13.9  | 16.6  | 21.3  | 1.2 | 0.1 | 0.8 | 0.1 |
| 9264 | 120f11 | AV636313 | HC057h03  |   |   | 20.9  | 16.8  | 26.3  | 0.9 | 0.3 | 0.8 | 0.4 |
| 9265 | 031a09 | BP086449 | MX009b01  |   |   | 8.3   | 9.4   | 12.2  | 1.1 | 0.3 | 0.8 | 0.2 |
| 9266 | 127g12 | AV642013 | HCL043h08 |   |   | 21.5  | 18.1  | 29.1  | 0.8 | 0.1 | 0.8 | 0.4 |
| 9267 | 116h12 | AV632050 | HC003c07  |   |   | 15.9  | 12.9  | 21.0  | 0.8 | 0.3 | 0.8 | 0.5 |
| 9268 | 003a12 | AV396177 | CL54c09   |   |   | 10.5  | 9.4   | 12.1  | 1.5 | 1.0 | 0.8 | 0.1 |
| 9269 | 118g05 | AV634168 | HC030b01  |   |   | 2.5   | 2.7   | 3.5   | 1.1 | 0.2 | 0.8 | 0.1 |
| 9270 | 123f07 | AV639680 | HCL003a03 |   |   | 24.4  | 18.1  | 27.1  | 0.7 | 0.1 | 0.8 | 0.4 |
| 9271 | 131e08 | AV644171 | HCL083c07 |   |   | 16.9  | 12.9  | 19.1  | 0.8 | 0.1 | 0.8 | 0.4 |
| 9272 | 008d11 | AV387664 | CM069f06  |   |   | 41.2  | 29.2  | 38.2  | 0.7 | 0.1 | 0.8 | 0.1 |
| 9273 | 149h09 | AV628722 | LCL046b09 |   |   | 15.3  | 13.8  | 17.1  | 0.9 | 0.5 | 0.8 | 0.4 |
| 9274 | 016b07 | AV641734 | HCL039e05 |   |   | 12.0  | 8.8   | 11.4  | 0.8 | 0.3 | 0.8 | 0.1 |
| 9275 | 014f10 | AV640320 | HCL014c04 |   |   | 22.4  | 15.8  | 24.8  | 0.7 | 0.4 | 0.8 | 0.5 |
| 9276 | 136d08 | AV620688 | LC025e07  |   |   | 10.0  | 8.8   | 11.5  | 0.9 | 0.1 | 0.8 | 0.1 |
| 9277 | 009g08 | AV392992 | CM099a03  |   |   | 11.4  | 12.2  | 15.8  | 1.1 | 0.2 | 0.8 | 0.1 |
| 9278 | 172f07 | BP098471 | MXL093g12 |   |   | 22.1  | 16.6  | 23.3  | 0.9 | 0.6 | 0.8 | 0.3 |
| 9279 | 106c11 | AV397219 | CL78b06   |   |   | 12.7  | 12.2  | 18.9  | 0.9 | 0.2 | 0.8 | 0.3 |
| 9280 | 161d02 | BP093089 | MXL003c02 |   |   | 12.5  | 10.0  | 13.0  | 0.8 | 0.1 | 0.8 | 0.2 |
| 9281 | 152h12 | AV630258 | LCL076c01 |   |   | 8.9   | 10.2  | 14.1  | 1.1 | 0.3 | 0.8 | 0.5 |
| 9282 | 154d02 | AV630929 | LCL086e01 |   |   | 12.3  | 7.9   | 10.8  | 0.7 | 0.2 | 0.8 | 0.2 |
| 9283 | 031b04 | BP086546 | MX011b09  |   |   | 11.8  | 8.1   | 10.6  | 0.7 | 0.2 | 0.8 | 0.2 |
| 9284 | 024e11 | AV626648 | LCL012h12 |   |   | 10.7  | 7.8   | 10.5  | 0.7 | 0.1 | 0.8 | 0.3 |
| 9285 | 122f09 | AV638689 | HC089e02  |   |   | 12.8  | 14.6  | 18.7  | 1.2 | 0.4 | 0.8 | 0.1 |
| 9286 | 031e11 | BP087043 | MX023g03  |   |   | 24.0  | 16.9  | 24.7  | 0.8 | 0.3 | 0.8 | 0.3 |
| 9287 | 151h09 | AV629729 | LCL064g07 |   |   | 8.5   | 5.7   | 7.3   | 0.7 | 0.1 | 0.8 | 0.1 |
| 9288 | 011e08 | AV635114 | HC042a07  |   |   | 8.5   | 7.7   | 10.3  | 0.9 | 0.3 | 0.8 | 0.4 |
| 9289 | 116d06 | AV392995 | CM099a09  |   |   | 8.4   | 6.0   | 8.4   | 0.7 | 0.1 | 0.8 | 0.3 |
| 9290 | 116e05 | AV392771 | CM099h09  |   |   | 35.2  | 23.0  | 32.1  | 0.7 | 0.2 | 0.8 | 0.4 |
| 9291 | 128d06 | AV642348 | HCL050b12 |   |   | 12.0  | 10.8  | 14.1  | 0.9 | 0.1 | 0.8 | 0.2 |
| 9292 | 164g08 | BP094916 | MXL032d07 |   |   | 309.6 | 340.1 | 428.3 | 1.2 | 0.7 | 0.8 | 0.2 |
| 9293 | 157h05 | BP087245 | MX026h06  |   |   | 8.0   | 8.0   | 12.9  | 1.0 | 0.2 | 0.8 | 0.5 |
| 9294 | 029a10 | AV630555 | LCL080f07 |   |   | 28.4  | 21.4  | 33.4  | 0.7 | 0.1 | 0.8 | 0.3 |
| 9295 | 103b02 | AV395044 | CL31h01   |   |   | 10.3  | 13.3  | 17.3  | 1.8 | 1.2 | 0.8 | 0.1 |
| 9296 | 150g10 | AV629161 | LCL053d03 |   |   | 11.9  | 14.2  | 18.6  | 1.2 | 0.1 | 0.8 | 0.1 |
| 9297 | 030d03 | AV631587 | LCL096e08 |   |   | 2.6   | 1.4   | 2.0   | 0.5 | 0.2 | 0.8 | 0.4 |
| 9298 | 024d04 | AV626522 | LCL010e09 |   |   | 16.2  | 17.4  | 22.6  | 1.1 | 0.2 | 0.8 | 0.1 |
| 9299 | 162d11 | BP093718 | MXL012a06 |   |   | 47.6  | 30.1  | 42.7  | 0.6 | 0.3 | 0.8 | 0.4 |
| 9300 | 033b09 | BP094156 | MXL018h05 |   |   | 11.0  | 11.4  | 14.8  | 1.1 | 0.3 | 0.8 | 0.2 |
| 9301 | 125h12 | AV640866 | HCL023g06 |   |   | 17.7  | 15.4  | 22.8  | 0.9 | 0.2 | 0.8 | 0.3 |
| 9302 | 036b10 | BP097903 | MXL083c02 |   |   | 12.3  | 7.3   | 9.6   | 0.6 | 0.1 | 0.8 | 0.2 |
| 9303 | 008f09 | AV389149 | CM074f09  |   |   | 7.3   | 4.6   | 6.0   | 0.6 | 0.0 | 0.8 | 0.1 |
| 9304 | 113h08 | AV388399 | CM071g04  |   |   | 16.6  | 14.9  | 21.7  | 0.9 | 0.0 | 0.8 | 0.3 |
| 9305 | 115d12 | AV390944 | CM088e01  |   |   | 10.5  | 7.2   | 13.5  | 0.7 | 0.3 | 0.8 | 0.  |

|      | A      | B        | C         | D | E | F     | G    | H     | I   | J   | K   | L   |
|------|--------|----------|-----------|---|---|-------|------|-------|-----|-----|-----|-----|
| 9307 | 123a08 | AV639152 | HC095f06  |   |   | 12.9  | 11.4 | 15.5  | 0.9 | 0.2 | 0.8 | 0.2 |
| 9308 | 015b09 | AV640761 | HCL022a01 |   |   | 10.0  | 8.8  | 12.8  | 1.0 | 0.4 | 0.8 | 0.4 |
| 9309 | 153a11 | AV630312 | LCL077a10 |   |   | 61.2  | 49.2 | 75.2  | 0.8 | 0.1 | 0.8 | 0.3 |
| 9310 | 131f02 | AV644195 | HCL083f11 |   |   | 16.7  | 15.3 | 20.8  | 0.9 | 0.1 | 0.8 | 0.2 |
| 9311 | 126d09 | AV641262 | HCL030g02 |   |   | 13.4  | 11.8 | 15.6  | 0.9 | 0.1 | 0.8 | 0.1 |
| 9312 | 102d03 | AV394386 | CL21h09   |   |   | 14.4  | 15.2 | 20.1  | 1.1 | 0.1 | 0.8 | 0.1 |
| 9313 | 151e04 | AV629537 | LCL060e06 |   |   | 23.4  | 22.3 | 30.0  | 0.9 | 0.1 | 0.8 | 0.3 |
| 9314 | 131c02 | AV643969 | HCL079d01 |   |   | 6.2   | 5.6  | 7.3   | 0.9 | 0.1 | 0.8 | 0.1 |
| 9315 | 133c07 | AV644996 | HCL096g04 |   |   | 31.3  | 25.6 | 36.0  | 0.8 | 0.0 | 0.8 | 0.2 |
| 9316 | 125c04 | AV640510 | HCL017f02 |   |   | 10.4  | 10.4 | 13.8  | 1.0 | 0.2 | 0.8 | 0.1 |
| 9317 | 014c06 | AV639886 | HCL006f11 |   |   | 29.8  | 22.3 | 30.3  | 0.7 | 0.1 | 0.8 | 0.3 |
| 9318 | 148f07 | AV628127 | LCL037b08 |   |   | 13.5  | 11.4 | 16.0  | 0.8 | 0.1 | 0.8 | 0.3 |
| 9319 | 028b08 | AV629691 | LCL063h02 |   |   | 18.2  | 21.1 | 27.8  | 1.2 | 0.5 | 0.8 | 0.2 |
| 9320 | 154f01 | AV631027 | LCL087g08 |   |   | 31.8  | 24.0 | 32.4  | 0.8 | 0.0 | 0.8 | 0.2 |
| 9321 | 029g10 | AV631111 | LCL089a03 |   |   | 14.4  | 11.1 | 21.1  | 0.8 | 0.1 | 0.8 | 0.5 |
| 9322 | 127h10 | AV642074 | HCL045b02 |   |   | 19.7  | 19.3 | 26.0  | 1.0 | 0.1 | 0.8 | 0.3 |
| 9323 | 036a09 | BP097731 | MXL080d05 |   |   | 21.4  | 14.8 | 21.0  | 0.7 | 0.1 | 0.8 | 0.4 |
| 9324 | 136f08 | BP383788 | LC027b06  |   |   | 8.2   | 6.4  | 8.2   | 0.8 | 0.2 | 0.8 | 0.1 |
| 9325 | 015f10 | AV641320 | HCL031e11 |   |   | 8.2   | 6.6  | 8.6   | 0.8 | 0.1 | 0.8 | 0.1 |
| 9326 | 003f07 | AV396865 | CL70f10   |   |   | 4.6   | 3.2  | 4.5   | 0.7 | 0.3 | 0.8 | 0.4 |
| 9327 | 169e04 | BP096999 | MXL068e01 |   |   | 4.4   | 4.9  | 6.8   | 1.1 | 0.2 | 0.8 | 0.4 |
| 9328 | 126f06 | AV641378 | HCL032e11 |   |   | 6.1   | 4.8  | 6.3   | 0.8 | 0.1 | 0.8 | 0.1 |
| 9329 | 036g10 | BP098722 | MXL098a04 |   |   | 22.0  | 22.0 | 29.1  | 1.1 | 0.3 | 0.8 | 0.1 |
| 9330 | 011b12 | AV634481 | HC039h12  |   |   | 6.9   | 3.9  | 5.4   | 0.6 | 0.1 | 0.8 | 0.2 |
| 9331 | 172d09 | BP098368 | MXL092c12 |   |   | 30.2  | 25.9 | 34.0  | 0.9 | 0.2 | 0.8 | 0.0 |
| 9332 | 150b06 | AV628891 | LCL048e08 |   |   | 43.2  | 22.0 | 27.6  | 0.5 | 0.2 | 0.8 | 0.3 |
| 9333 | 169f11 | BP097085 | MXL069g06 |   |   | 45.8  | 26.5 | 34.5  | 0.6 | 0.0 | 0.8 | 0.0 |
| 9334 | 104g10 | AV396159 | CL54c06   |   |   | 7.5   | 5.6  | 7.3   | 0.8 | 0.1 | 0.8 | 0.2 |
| 9335 | 110b01 | AV388870 | CM033d09  |   |   | 11.1  | 10.4 | 13.7  | 1.0 | 0.2 | 0.8 | 0.1 |
| 9336 | 153c06 | AV630414 | LCL078e07 |   |   | 20.4  | 15.4 | 20.2  | 0.8 | 0.2 | 0.8 | 0.1 |
| 9337 | 126a06 | AV640964 | HCL025d11 |   |   | 26.8  | 20.0 | 28.7  | 0.8 | 0.1 | 0.8 | 0.3 |
| 9338 | 152e08 | AV630020 | LCL071b12 |   |   | 14.5  | 15.2 | 20.9  | 1.1 | 0.0 | 0.8 | 0.2 |
| 9339 | 110b06 | AV388941 | CM033g08  |   |   | 16.8  | 14.2 | 18.6  | 0.8 | 0.1 | 0.8 | 0.1 |
| 9340 | 144h09 | AV626434 | LCL009a01 |   |   | 17.3  | 15.2 | 20.2  | 0.9 | 0.1 | 0.8 | 0.1 |
| 9341 | 149b11 | AV628390 | LCL041a10 |   |   | 16.7  | 16.4 | 21.7  | 1.1 | 0.4 | 0.8 | 0.1 |
| 9342 | 108e02 | AV387362 | CM019e11  |   |   | 11.5  | 7.9  | 10.5  | 0.8 | 0.3 | 0.8 | 0.1 |
| 9343 | 150d10 | AV629002 | LCL050b10 |   |   | 18.1  | 16.1 | 24.0  | 0.9 | 0.1 | 0.8 | 0.3 |
| 9344 | 028h12 | AV630421 | LCL078f04 |   |   | 18.4  | 16.4 | 25.6  | 0.9 | 0.1 | 0.8 | 0.4 |
| 9345 | 164h04 | BP094968 | MXL033e08 |   |   | 5.2   | 4.2  | 7.1   | 0.8 | 0.3 | 0.8 | 0.6 |
| 9346 | 114g09 | AV389936 | CM081b02  |   |   | 128.3 | 94.8 | 123.5 | 0.7 | 0.2 | 0.8 | 0.1 |
| 9347 | 110a04 | AV388752 | CM031h09  |   |   | 12.4  | 14.8 | 26.6  | 1.2 | 0.4 | 0.8 | 0.6 |
| 9348 | 124b02 | AV639976 | HCL008b10 |   |   | 35.7  | 25.7 | 33.6  | 0.7 | 0.1 | 0.8 | 0.1 |
| 9349 | 115h09 | AV391767 | CM093e04  |   |   | 78.4  | 41.1 | 53.0  | 0.5 | 0.1 | 0.8 | 0.1 |
| 9350 | 144e07 | AV626275 | LCL005f07 |   |   | 15.8  | 13.9 | 19.1  | 0.9 | 0.1 | 0.8 | 0.2 |
| 9351 | 153g03 | AV630626 | LCL081g04 |   |   | 32.7  | 26.1 | 35.3  | 0.8 | 0.1 | 0.8 | 0.2 |
| 9352 | 153h06 | AV630708 | LCL083a05 |   |   | 12.2  | 9.0  | 12.6  | 0.7 | 0.1 | 0.8 | 0.2 |
| 9353 | 169h02 | BP097138 | MXL070g01 |   |   | 11.6  | 9.1  | 15.2  | 0.8 | 0.2 | 0.8 | 0.5 |
| 9354 | 153c10 | AV630443 | LCL078h09 |   |   | 16.6  | 11.5 | 15.7  | 0.8 | 0.2 | 0.8 | 0.2 |
| 9355 | 016d11 | AV642191 | HCL047b08 |   |   | 1.1   | 1.1  | 1.5   | 1.1 | 0.3 | 0.8 | 0.2 |
| 9356 | 003d10 | AV396540 | CL63e11   |   |   | 6.0   | 8.3  | 10.9  | 1.4 | 0.2 | 0.8 | 0.1 |
| 9357 | 157h06 | BP087254 | MX029b05  |   |   | 39.0  | 23.6 | 31.0  | 0.6 | 0.2 | 0.8 | 0.1 |
| 9358 | 123e07 | AV639619 | HCL002a04 |   |   | 34.8  | 29.7 | 41.6  | 0.9 | 0.2 | 0.8 | 0.2 |
| 9359 | 126b05 | AV641048 | HCL026h02 |   |   | 15.0  | 13.1 | 17.4  | 0.9 | 0.0 | 0.8 | 0.1 |
| 9360 | 129b02 | AV642663 | HCL055f06 |   |   | 13.5  | 11.5 | 15.9  | 0.9 | 0.2 | 0.8 | 0.3 |
| 9361 | 026h12 | AV628708 | LCL046a03 |   |   | 5.8   | 4.2  | 5.6   | 0.7 | 0.1 | 0.8 | 0.2 |
| 9362 | 008c05 | AV393197 | CM068b06  |   |   | 36.6  | 26.8 | 34.5  | 0.7 | 0.3 | 0.8 | 0.4 |
| 9363 | 170e08 | BP097457 | MXL076a08 |   |   | 11.2  | 7.9  | 11.8  | 0.7 | 0.1 | 0.8 | 0.4 |
| 9364 | 127g06 | AV641991 | HCL043e08 |   |   | 8.7   | 7.3  | 9.7   | 0.8 | 0.1 | 0.8 | 0.1 |
| 9365 | 125b09 | AV640468 | HCL016h01 |   |   | 15.0  | 12.7 | 18.1  | 0.9 | 0.0 | 0.8 | 0.2 |
| 9366 | 136h04 | AV620965 | LC029c10  |   |   | 17.4  | 17.1 | 33.2  | 1.0 | 0.1 | 0.8 | 0.5 |
| 9367 | 033h10 | BP095113 | MXL036a10 |   |   | 3.9   | 4.4  | 6.0   | 1.2 | 0.3 | 0.8 | 0.3 |
| 9368 | 148d06 | AV627997 | LCL035b03 |   |   | 30.3  | 21.1 | 28.3  | 0.7 | 0.1 | 0.8 | 0.2 |
| 9369 | 146d07 | AV627092 | LCL021a03 |   |   | 30.0  | 20.2 | 26.7  | 0.7 | 0.1 | 0.8 | 0.1 |
| 9370 | 165h12 | BP095404 | MXL041c08 |   |   | 7.6   | 4.6  | 6.9   | 0.6 | 0.3 | 0.8 | 0.6 |
| 9371 | 172h04 | BP098559 | MXL095d10 |   |   | 9.3   | 8.2  | 12.5  | 0.9 | 0.3 | 0.8 | 0.5 |
| 9372 | 133d02 | AV645034 | HCL097c05 |   |   | 11.7  | 10.0 | 13.2  | 0.9 | 0.2 | 0.8 | 0.1 |
| 9373 | 148c09 | AV627954 | LCL034d09 |   |   | 22.3  | 18.1 | 24.3  | 0.8 | 0.1 | 0.8 | 0.1 |
| 9374 | 009d01 | AV391058 | CM088f03  |   |   | 12.8  | 8.8  | 11.8  | 0.8 | 0.4 | 0.8 | 0.2 |
| 9375 | 127h04 | AV642040 | HCL044d01 |   |   | 43.2  | 33.1 | 57.5  | 0.8 | 0.2 | 0.8 | 0.4 |
| 9376 | 171h09 | BP098158 | MXL088d08 |   |   | 14.0  | 8.3  | 22.9  | 0.6 | 0.5 | 0.8 | 0.8 |
| 9377 | 153h07 | AV630710 | LCL083a07 |   |   | 3.9   | 3.3  | 4.5   | 0.9 | 0.4 | 0.8 | 0.2 |
| 9378 | 117d07 | AV632645 | HC010g08  |   |   | 10.6  | 9.0  | 12.1  | 0.9 | 0.2 | 0.8 | 0.1 |
| 9379 | 117g10 | AV633152 | HC017d05  |   |   | 96.5  | 73.5 | 96.9  | 0.8 | 0.1 | 0.8 | 0.0 |
| 9380 | 171f09 | BP098035 | MXL085f08 |   |   | 8.2   | 5.5  | 8.0   | 0.7 | 0.3 | 0.8 | 0.5 |
| 9381 | 164d07 | BP094743 | MXL028f03 |   |   | 9.4   | 6.0  | 7.8   | 0.6 | 0.2 | 0.8 | 0.1 |
| 9382 | 007c07 | AV391392 | CM053g11  |   |   | 53.0  | 63.2 | 87.6  | 1.2 | 0.3 | 0.8 | 0.2 |
| 9383 | 127c09 | AV641741 | HCL039f06 |   |   | 17.7  | 16.0 | 21.2  | 0.9 | 0.1 | 0.8 | 0.2 |
| 9384 | 168g02 | BP096673 | MXL062h01 |   |   | 5.9   | 4.3  | 7.0   | 0.7 | 0.4 | 0.8 | 0.5 |
| 9385 | 125d09 | AV640620 | HCL019d02 |   |   | 10.3  | 8.1  | 10.9  | 0.8 | 0.2 | 0.8 | 0.1 |
| 9386 | 121c11 | AV637026 | HC067f03  |   |   | 11.4  | 7.5  | 10.0  | 0.7 | 0.1 | 0.8 | 0.1 |
| 9387 | 036g07 | BP098674 | MXL097c02 |   |   | 41.8  | 31.2 | 44.9  | 0.7 | 0.1 | 0.8 | 0.2 |
| 9388 | 129d05 | AV642831 | HCL058h06 |   |   | 14.5  | 13.3 | 18.4  | 0.9 | 0.1 | 0.8 | 0.2 |
| 9389 | 124e12 | AV640199 | HCL012a08 |   |   | 14.0  | 11.2 | 15.1  | 0.8 | 0.1 | 0.8 | 0.1 |
| 9390 | 113h02 | AV388340 | CM070h05  |   |   | 73.1  | 45.4 | 61.8  | 0.6 | 0.1 | 0.8 | 0.2 |
| 9391 | 146b11 | AV627023 | LCL020a01 |   |   | 19.9  | 19.8 | 26.3  | 1.0 | 0.1 | 0.8 | 0.1 |
| 9392 | 125a08 | AV640408 | HCL015g05 |   |   | 8.0   | 6.4  | 8.8   | 0.8 | 0.1 | 0.8 | 0.2 |
| 9393 | 150c11 | AV628943 | LCL049d01 |   |   | 23.1  | 16.8 | 22.1  | 0.8 | 0.3 | 0.8 | 0.1 |
| 9394 | 114b02 | AV388997 | CM073f02  |   |   | 26.8  | 16.1 | 22.8  | 0.7 | 0.5 | 0.8 | 0.4 |
| 9395 | 148g12 | AV628210 | LCL038e05 |   |   | 71.9  | 46.1 | 63.7  | 0.6 | 0.0 | 0.8 | 0.2 |
| 9396 | 154f05 | AV631060 | LCL088c03 |   |   | 11.7  | 9.2  | 11.9  | 0.8 | 0.2 | 0.8 | 0.1 |
| 9397 | 161e11 | BP093219 | MXL005b11 |   |   | 30.7  | 30.7 | 42.6  | 1.1 | 0.4 | 0.8 | 0.2 |
| 9398 | 029e05 | AV630910 | LCL086b11 |   |   | 15.7  | 12.6 | 17.0  | 0.8 | 0.1 | 0.8 | 0.2 |
| 9399 | 155f08 | AV631537 | LCL095h04 |   |   | 14.6  | 9.7  | 14.8  | 0.7 | 0.3 | 0.8 | 0.5 |
| 9400 | 007g08 | AV392280 | CM060d10  |   |   | 8.9   | 8.8  | 11.7  | 1.0 | 0.2 | 0.8 | 0.1 |
| 9401 | 160h06 | BP089389 | MX206d03  |   |   | 10.3  | 9.0  | 12.2  | 0.9 | 0.5 | 0.8 | 0.4 |
| 9402 | 023g10 | AV626104 | LCL002d09 |   |   | 17.8  | 13.9 | 22.2  | 0.8 | 0.1 | 0.8 | 0.3 |
| 9403 | 131d02 | BP383749 | HCL081c06 |   |   | 23.6  | 17.7 | 23.8  | 0.8 | 0.1 | 0.8 | 0.1 |
| 9404 | 107d09 | AV397636 | CM009f08  |   |   | 17.6  | 16.8 | 22.5  | 1.0 | 0.2 | 0.8 | 0.1 |
| 9405 | 162d12 | BP093726 | MXL012g01 |   |   | 16.0  | 14.8 | 19.6  | 0.9 | 0.1 | 0.8 | 0.1 |
| 9406 | 131b08 | AV643904 | HCL078b09 |   |   | 24.6  | 23.0 | 30.7  | 0.9 | 0.2 | 0.8 | 0.3 |
| 9407 | 142f02 | AV625271 | LC090c02  |   |   | 27.1  | 18.0 | 23.7  | 0.7 | 0.2 | 0.8 | 0.2 |
| 9408 | 118g08 | AV634224 | HC030g03  |   |   | 6.0   | 4.3  | 5.7   | 0.7 | 0.2 | 0.8 | 0.1 |
| 9409 | 127g05 | AV641990 | HCL043e07 |   |   | 7.5   | 6.2  | 8.3   | 0.8 | 0.1 | 0.8 | 0.1 |
| 9410 | 129b03 | AV642674 | HCL055h02 |   |   | 15.7  | 14.5 | 19.2  | 0.9 | 0.1 | 0.8 | 0.0 |
| 9411 | 003b10 | AV396277 | CL57a01   |   |   | 5.2   | 4.1  | 8.7   | 0.9 | 0.4 | 0.8 | 0.6 |
| 9412 | 171e05 | BP097967 | MXL084d05 |   |   | 9.3   | 8.6  | 11.8  | 0.9 | 0.1 | 0.8 | 0.3 |

|      | A      | B        | C         | D | E | F     | G     | H     | I   | J   | K   | L   |
|------|--------|----------|-----------|---|---|-------|-------|-------|-----|-----|-----|-----|
| 9414 | 101a11 | AV393347 | CL01e10   |   |   | 7.1   | 7.7   | 15.0  | 1.3 | 0.4 | 0.8 | 0.7 |
| 9415 | 125g10 | AV640801 | HCL022f10 |   |   | 32.4  | 28.5  | 41.4  | 0.9 | 0.0 | 0.8 | 0.3 |
| 9416 | 151g07 | AV629655 | LCL062g04 |   |   | 19.2  | 14.3  | 18.7  | 0.7 | 0.1 | 0.8 | 0.1 |
| 9417 | 123b10 | AV639347 | HC098c01  |   |   | 50.7  | 33.5  | 45.4  | 0.7 | 0.0 | 0.8 | 0.2 |
| 9418 | 145f05 | AV626787 | LCL015d08 |   |   | 12.6  | 10.8  | 14.3  | 0.9 | 0.2 | 0.8 | 0.1 |
| 9419 | 109c06 | AV388087 | CM025b07  |   |   | 63.3  | 32.2  | 42.2  | 0.5 | 0.0 | 0.8 | 0.1 |
| 9420 | 026d03 | AV628303 | LCL039g09 |   |   | 11.6  | 8.7   | 11.5  | 0.8 | 0.2 | 0.8 | 0.1 |
| 9421 | 168g04 | BP096676 | MXL062h04 |   |   | 7.0   | 3.9   | 5.4   | 0.6 | 0.2 | 0.8 | 0.2 |
| 9422 | 161d12 | BP098871 | MXL100e05 |   |   | 6.4   | 6.0   | 8.1   | 1.0 | 0.2 | 0.8 | 0.1 |
| 9423 | 024c09 | AV626483 | LCL009h12 |   |   | 22.7  | 18.4  | 31.3  | 0.8 | 0.2 | 0.8 | 0.5 |
| 9424 | 003g08 | AV396473 | CL74f09   |   |   | 18.0  | 16.2  | 21.7  | 0.9 | 0.1 | 0.8 | 0.1 |
| 9425 | 102f08 | AV394547 | CL25h11   |   |   | 11.4  | 9.7   | 13.7  | 0.9 | 0.1 | 0.8 | 0.2 |
| 9426 | 169e11 | BP097028 | MXL068h05 |   |   | 16.4  | 15.2  | 20.6  | 0.9 | 0.1 | 0.8 | 0.3 |
| 9427 | 131d07 | AV644096 | HCL081g04 |   |   | 15.5  | 11.7  | 15.7  | 0.8 | 0.0 | 0.8 | 0.1 |
| 9428 | 007g10 | AV392335 | CM060h05  |   |   | 7.6   | 7.8   | 10.2  | 1.0 | 0.2 | 0.8 | 0.2 |
| 9429 | 126b12 | AV641077 | HCL027d04 |   |   | 19.7  | 17.9  | 25.4  | 0.9 | 0.1 | 0.8 | 0.3 |
| 9430 | 012d01 | AV636571 | HC061c06  |   |   | 3.5   | 4.4   | 5.8   | 1.3 | 0.3 | 0.8 | 0.1 |
| 9431 | 170d11 | BP097423 | MXL075e01 |   |   | 27.6  | 23.8  | 31.8  | 0.9 | 0.2 | 0.8 | 0.2 |
| 9432 | 158g09 | BP087698 | MX041f11  |   |   | 99.1  | 84.6  | 112.8 | 0.9 | 0.2 | 0.8 | 0.0 |
| 9433 | 147e02 | AV627558 | LCL028e05 |   |   | 28.7  | 22.7  | 30.2  | 0.8 | 0.0 | 0.8 | 0.1 |
| 9434 | 138f06 | AV622454 | LCL049h12 |   |   | 6.6   | 9.5   | 13.1  | 1.4 | 0.1 | 0.8 | 0.2 |
| 9435 | 115f12 | AV391325 | CM090d02  |   |   | 8.2   | 5.4   | 7.9   | 0.7 | 0.1 | 0.8 | 0.3 |
| 9436 | 139b10 | AV622879 | LCL055h11 |   |   | 8.6   | 6.7   | 8.8   | 0.8 | 0.1 | 0.8 | 0.3 |
| 9437 | 149f07 | AV628562 | LCL043g08 |   |   | 26.1  | 19.1  | 26.6  | 0.7 | 0.1 | 0.8 | 0.2 |
| 9438 | 125e01 | AV640639 | HCL019f05 |   |   | 18.6  | 15.5  | 20.9  | 0.8 | 0.1 | 0.8 | 0.1 |
| 9439 | 113g04 | AV389370 | CM070c07  |   |   | 80.4  | 65.8  | 89.5  | 0.8 | 0.1 | 0.8 | 0.1 |
| 9440 | 015g11 | AV641436 | HCL033e11 |   |   | 4.4   | 3.5   | 4.7   | 0.8 | 0.2 | 0.8 | 0.2 |
| 9441 | 013h10 | AV639637 | HCL002c02 |   |   | 8.4   | 6.3   | 9.1   | 0.7 | 0.2 | 0.8 | 0.4 |
| 9442 | 034c08 | BP095585 | MXL044b10 |   |   | 16.5  | 11.0  | 14.8  | 0.7 | 0.1 | 0.8 | 0.2 |
| 9443 | 127f08 | AV641939 | HCL042g08 |   |   | 33.4  | 28.1  | 36.8  | 0.8 | 0.2 | 0.8 | 0.2 |
| 9444 | 012d06 | AV636766 | HC063h07  |   |   | 6.0   | 9.3   | 12.5  | 1.5 | 0.6 | 0.8 | 0.3 |
| 9445 | 012h11 | AV637694 | HC076d01  |   |   | 4.5   | 4.3   | 5.5   | 1.0 | 0.2 | 0.8 | 0.2 |
| 9446 | 145g07 | AV626853 | LCL016g01 |   |   | 20.1  | 19.2  | 26.7  | 1.0 | 0.1 | 0.8 | 0.2 |
| 9447 | 131d08 | AV644102 | HCL081h02 |   |   | 15.9  | 11.9  | 15.7  | 0.7 | 0.1 | 0.8 | 0.1 |
| 9448 | 168d02 | BP096451 | MXL058h12 |   |   | 4.4   | 3.5   | 4.7   | 0.8 | 0.3 | 0.8 | 0.2 |
| 9449 | 015d10 | AV641104 | HCL027h02 |   |   | 8.5   | 6.3   | 8.4   | 0.7 | 0.2 | 0.8 | 0.3 |
| 9450 | 157e04 | BP086961 | MX021e07  |   |   | 4.8   | 5.0   | 6.8   | 1.1 | 0.1 | 0.8 | 0.2 |
| 9451 | 169d07 | BP096968 | MXL067h09 |   |   | 11.3  | 12.2  | 17.9  | 1.4 | 0.9 | 0.8 | 0.3 |
| 9452 | 021d06 | AV622333 | LCL048c08 |   |   | 18.3  | 20.3  | 27.5  | 1.1 | 0.1 | 0.8 | 0.1 |
| 9453 | 163e08 | BP094341 | MXL021e05 |   |   | 5.9   | 8.6   | 11.9  | 1.6 | 0.5 | 0.8 | 0.2 |
| 9454 | 028a09 | AV629580 | LCL061c12 |   |   | 9.5   | 7.4   | 10.3  | 0.8 | 0.2 | 0.8 | 0.2 |
| 9455 | 154g08 | AV631139 | LCL089d09 |   |   | 14.9  | 21.1  | 28.5  | 1.4 | 0.1 | 0.8 | 0.3 |
| 9456 | 035e01 | BP097039 | MXL069a10 |   |   | 46.5  | 19.9  | 27.4  | 0.4 | 0.1 | 0.7 | 0.1 |
| 9457 | 111b12 | AV390311 | CM045b05  |   |   | 12.0  | 8.8   | 13.0  | 0.7 | 0.2 | 0.7 | 0.5 |
| 9458 | 168h10 | BP096745 | MXL064b07 |   |   | 4.3   | 13.0  | 18.0  | 2.8 | 1.6 | 0.7 | 0.6 |
| 9459 | 145e06 | AV626725 | LCL014d06 |   |   | 8.7   | 7.2   | 9.7   | 0.9 | 0.2 | 0.7 | 0.1 |
| 9460 | 146h12 | AV627322 | LCL025a02 |   |   | 8.1   | 7.7   | 10.3  | 0.9 | 0.1 | 0.7 | 0.3 |
| 9461 | 132a08 | AV644423 | HCL088c03 |   |   | 13.9  | 12.0  | 16.7  | 0.9 | 0.1 | 0.7 | 0.1 |
| 9462 | 015b10 | AV640771 | HCL022b06 |   |   | 6.2   | 5.6   | 7.6   | 0.9 | 0.3 | 0.7 | 0.3 |
| 9463 | 028d08 | AV629937 | LCL069d10 |   |   | 15.7  | 11.3  | 15.5  | 0.7 | 0.1 | 0.7 | 0.2 |
| 9464 | 125d07 | AV640615 | HCL019c04 |   |   | 57.5  | 50.7  | 67.9  | 0.9 | 0.1 | 0.7 | 0.1 |
| 9465 | 170d10 | BP097419 | MXL075d07 |   |   | 6.2   | 4.5   | 6.5   | 0.8 | 0.3 | 0.7 | 0.4 |
| 9466 | 123h04 | AV639835 | HCL005h03 |   |   | 11.4  | 8.5   | 13.2  | 0.8 | 0.1 | 0.7 | 0.4 |
| 9467 | 161e12 | BP093220 | MXL005b12 |   |   | 17.6  | 14.8  | 20.6  | 0.8 | 0.1 | 0.7 | 0.3 |
| 9468 | 033c11 | BP094298 | MXL020g07 |   |   | 26.0  | 16.4  | 22.5  | 0.6 | 0.1 | 0.7 | 0.1 |
| 9469 | 112a04 | AV391356 | CM053d08  |   |   | 12.0  | 15.1  | 22.3  | 1.4 | 0.5 | 0.7 | 0.3 |
| 9470 | 105g12 | AV396779 | CL69d07   |   |   | 17.4  | 15.4  | 26.8  | 0.9 | 0.2 | 0.7 | 0.4 |
| 9471 | 151f03 | AV629594 | LCL061f03 |   |   | 52.5  | 45.1  | 64.3  | 0.9 | 0.2 | 0.7 | 0.2 |
| 9472 | 128a03 | AV642113 | HCL045g12 |   |   | 11.8  | 9.6   | 13.4  | 0.8 | 0.1 | 0.7 | 0.2 |
| 9473 | 171d01 | BP097869 | MXL082f10 |   |   | 4.7   | 4.4   | 6.0   | 1.0 | 0.0 | 0.7 | 0.1 |
| 9474 | 006h10 | AV390740 | CM047f09  |   |   | 6.6   | 5.8   | 8.1   | 0.8 | 0.4 | 0.7 | 0.5 |
| 9475 | 120e08 | AV636112 | HC055c09  |   |   | 8.3   | 5.5   | 7.4   | 0.7 | 0.0 | 0.7 | 0.1 |
| 9476 | 028f06 | AV630186 | LCL075a04 |   |   | 8.2   | 6.6   | 8.9   | 0.9 | 0.3 | 0.7 | 0.1 |
| 9477 | 027e07 | AV629253 | LCL055c10 |   |   | 2.1   | 11.3  | 16.9  | 5.6 | 2.1 | 0.7 | 0.2 |
| 9478 | 161h03 | BP093365 | MXL007d10 |   |   | 14.9  | 13.5  | 22.2  | 0.9 | 0.3 | 0.7 | 0.6 |
| 9479 | 015c06 | AV640910 | HCL024e08 |   |   | 5.0   | 5.5   | 7.3   | 1.1 | 0.2 | 0.7 | 0.3 |
| 9480 | 146d01 | AV627073 | LCL020f09 |   |   | 19.0  | 12.4  | 19.2  | 0.7 | 0.0 | 0.7 | 0.4 |
| 9481 | 002h11 | AV395883 | CL52b08   |   |   | 10.4  | 7.7   | 10.1  | 0.7 | 0.2 | 0.7 | 0.2 |
| 9482 | 165e12 | BP095267 | MXL039b03 |   |   | 8.1   | 9.5   | 12.9  | 1.2 | 0.3 | 0.7 | 0.2 |
| 9483 | 152f07 | AV630052 | LCL072a11 |   |   | 22.3  | 15.9  | 23.6  | 0.7 | 0.1 | 0.7 | 0.3 |
| 9484 | 028d03 | AV629888 | LCL068d06 |   |   | 2.8   | 1.3   | 2.0   | 0.5 | 0.2 | 0.7 | 0.4 |
| 9485 | 171h03 | BP098136 | MXL087h10 |   |   | 218.9 | 241.8 | 325.8 | 1.1 | 0.2 | 0.7 | 0.1 |
| 9486 | 149e09 | AV628530 | LCL043d02 |   |   | 6.9   | 6.1   | 8.4   | 0.9 | 0.1 | 0.7 | 0.3 |
| 9487 | 153b11 | AV630379 | LCL078a07 |   |   | 27.2  | 23.6  | 33.9  | 0.9 | 0.4 | 0.7 | 0.2 |
| 9488 | 126d05 | AV641247 | HCL030d11 |   |   | 32.0  | 27.5  | 45.1  | 0.9 | 0.3 | 0.7 | 0.3 |
| 9489 | 124e03 | AV640162 | HCL011e01 |   |   | 8.9   | 8.1   | 10.9  | 0.9 | 0.2 | 0.7 | 0.1 |
| 9490 | 133f11 | AV645153 | HCL098h05 |   |   | 33.1  | 27.5  | 46.4  | 0.8 | 0.1 | 0.7 | 0.4 |
| 9491 | 036e05 | BP097958 | MXL084b06 |   |   | 19.4  | 15.5  | 22.9  | 0.8 | 0.2 | 0.7 | 0.3 |
| 9492 | 126e03 | AV641288 | HCL031b01 |   |   | 15.2  | 11.4  | 16.0  | 0.8 | 0.2 | 0.7 | 0.2 |
| 9493 | 027g01 | AV629370 | LCL057e07 |   |   | 6.2   | 2.8   | 3.8   | 0.4 | 0.1 | 0.7 | 0.3 |
| 9494 | 154d05 | AV630949 | LCL086g06 |   |   | 25.1  | 20.4  | 29.5  | 0.8 | 0.0 | 0.7 | 0.2 |
| 9495 | 009g07 | AV392670 | CM098h12  |   |   | 28.3  | 26.2  | 42.2  | 0.9 | 0.1 | 0.7 | 0.4 |
| 9496 | 148h03 | AV628223 | LCL038f09 |   |   | 10.9  | 9.1   | 12.3  | 0.8 | 0.1 | 0.7 | 0.1 |
| 9497 | 108f11 | AV387954 | CM021c08  |   |   | 98.6  | 91.8  | 121.8 | 0.9 | 0.3 | 0.7 | 0.2 |
| 9498 | 111g03 | AV391082 | CM050h04  |   |   | 6.1   | 7.2   | 9.8   | 1.2 | 0.2 | 0.7 | 0.1 |
| 9499 | 149g03 | AV628621 | LCL044f05 |   |   | 22.2  | 17.1  | 23.7  | 0.8 | 0.1 | 0.7 | 0.2 |
| 9500 | 164g10 | BP094943 | MXL033a04 |   |   | 6.3   | 4.2   | 7.6   | 0.6 | 0.3 | 0.7 | 0.7 |
| 9501 | 146h07 | AV627283 | LCL024d02 |   |   | 4.3   | 3.0   | 4.1   | 0.7 | 0.2 | 0.7 | 0.1 |
| 9502 | 168d04 | BP096472 | MXL059c07 |   |   | 17.1  | 19.7  | 27.5  | 1.2 | 0.3 | 0.7 | 0.3 |
| 9503 | 135a06 | AV619640 | LCL011b06 |   |   | 30.2  | 24.3  | 34.8  | 0.8 | 0.1 | 0.7 | 0.2 |
| 9504 | 001h08 | AV394619 | CL26h09   |   |   | 5.9   | 3.3   | 6.0   | 0.6 | 0.2 | 0.7 | 0.6 |
| 9505 | 131g01 | AV644264 | HCL085a07 |   |   | 19.9  | 15.6  | 21.0  | 0.8 | 0.2 | 0.7 | 0.1 |
| 9506 | 155f05 | AV631516 | LCL095d09 |   |   | 3.8   | 3.6   | 5.0   | 1.0 | 0.4 | 0.7 | 0.2 |
| 9507 | 129d08 | AV642838 | HCL059a07 |   |   | 47.9  | 36.8  | 49.5  | 0.8 | 0.0 | 0.7 | 0.0 |
| 9508 | 023h12 | AV626242 | LCL004h12 |   |   | 19.4  | 14.3  | 19.4  | 0.7 | 0.1 | 0.7 | 0.0 |
| 9509 | 135f07 | AV620110 | LCL017f10 |   |   | 31.1  | 23.7  | 32.2  | 0.8 | 0.1 | 0.7 | 0.1 |
| 9510 | 149e11 | AV628536 | LCL043d11 |   |   | 21.6  | 19.7  | 26.5  | 0.9 | 0.1 | 0.7 | 0.1 |
| 9511 | 103f07 | AV395343 | CL40e05   |   |   | 9.1   | 8.0   | 12.3  | 0.9 | 0.1 | 0.7 | 0.3 |
| 9512 | 114e03 | AV388011 | CM077f06  |   |   | 19.0  | 19.8  | 26.9  | 1.0 | 0.2 | 0.7 | 0.1 |
| 9513 | 118c04 | AV633638 | HC023c09  |   |   | 10.2  | 5.8   | 7.9   | 0.7 | 0.3 | 0.7 | 0.1 |
| 9514 | 152e10 | AV630024 | LCL071d08 |   |   | 6.3   | 5.0   | 6.8   | 0.9 | 0.3 | 0.7 | 0.1 |
| 9515 | 033d07 | BP094359 | MXL021h07 |   |   | 5.0   | 5.3   | 7.2   | 1.1 | 0.3 | 0.7 | 0.1 |
| 9516 | 148g07 | AV628182 | LCL037h07 |   |   | 11.5  | 10.7  | 14.3  | 0.9 | 0.2 | 0.7 | 0.1 |
| 9517 | 156e02 | BP086146 | MX002g05  |   |   | 18.9  | 9.5   | 12.9  | 0.5 | 0.1 | 0.7 | 0.2 |
| 9518 | 126g02 | AV641442 | HCL033f09 |   |   | 17.3  | 15.5  | 21.0  | 0.9 | 0.1 | 0.7 | 0.1 |
| 9519 | 166d06 | BP095622 | MXL044g03 |   |   | 12.7  | 9.8   | 13.4  | 0.8 | 0.1 | 0.7 | 0.1 |
| 9520 | 169g05 |          |           |   |   |       |       |       |     |     |     |     |

|      | A      | B        | C         | D | E | F     | G     | H     | I   | J   | K   | L   |
|------|--------|----------|-----------|---|---|-------|-------|-------|-----|-----|-----|-----|
| 9521 | 124d06 | AV640132 | HCL011a01 |   |   | 12.1  | 9.7   | 13.4  | 0.8 | 0.1 | 0.7 | 0.1 |
| 9522 | 172h07 | BP098562 | MXL095e09 |   |   | 9.2   | 6.5   | 12.0  | 0.6 | 0.4 | 0.7 | 0.8 |
| 9523 | 132e10 | AV644720 | HCL092g11 |   |   | 81.0  | 55.4  | 88.2  | 0.7 | 0.1 | 0.7 | 0.4 |
| 9524 | 119g11 | AV635493 | HC047a06  |   |   | 14.9  | 10.2  | 14.6  | 0.7 | 0.1 | 0.7 | 0.4 |
| 9525 | 169g02 | BP097092 | MXL069h05 |   |   | 16.0  | 10.0  | 16.9  | 0.6 | 0.4 | 0.7 | 0.6 |
| 9526 | 166h01 | BP095780 | MXL047c09 |   |   | 10.0  | 6.9   | 9.9   | 0.7 | 0.4 | 0.7 | 0.6 |
| 9527 | 004f01 | AV386973 | CM010f06  |   |   | 7.5   | 6.8   | 10.3  | 0.9 | 0.3 | 0.7 | 0.3 |
| 9528 | 141h08 | AV624813 | LCO83b01  |   |   | 35.0  | 16.2  | 24.6  | 0.5 | 0.2 | 0.7 | 0.2 |
| 9529 | 151h05 | AV629714 | LCL064c10 |   |   | 9.2   | 8.0   | 10.9  | 0.9 | 0.1 | 0.7 | 0.0 |
| 9530 | 148g09 | AV628191 | LCL038a12 |   |   | 20.6  | 16.5  | 21.7  | 0.8 | 0.1 | 0.7 | 0.1 |
| 9531 | 167d11 | BP096056 | MXL051g10 |   |   | 15.6  | 11.0  | 15.6  | 0.7 | 0.2 | 0.7 | 0.2 |
| 9532 | 025e07 | AV627486 | LCL027e01 |   |   | 8.8   | 6.9   | 10.0  | 0.8 | 0.2 | 0.7 | 0.3 |
| 9533 | 131f09 | AV644245 | HCL084f08 |   |   | 13.1  | 9.8   | 15.4  | 0.7 | 0.3 | 0.7 | 0.6 |
| 9534 | 122h04 | AV638991 | HC093e07  |   |   | 27.6  | 19.4  | 27.2  | 0.8 | 0.3 | 0.7 | 0.2 |
| 9535 | 146e10 | AV627148 | LCL021h04 |   |   | 7.5   | 7.1   | 10.4  | 1.0 | 0.3 | 0.7 | 0.3 |
| 9536 | 127d03 | AV641763 | HCL039h06 |   |   | 13.0  | 9.3   | 13.3  | 0.7 | 0.1 | 0.7 | 0.2 |
| 9537 | 025b12 | AV627164 | LCL022a12 |   |   | 19.8  | 14.4  | 21.9  | 0.7 | 0.1 | 0.7 | 0.3 |
| 9538 | 169h09 | BP097168 | MXL071b09 |   |   | 8.9   | 7.1   | 9.6   | 0.7 | 0.3 | 0.7 | 0.5 |
| 9539 | 163h07 | BP094553 | MXL024h02 |   |   | 3.8   | 2.7   | 6.3   | 0.6 | 0.5 | 0.7 | 0.8 |
| 9540 | 132c01 | AV644551 | HCL090d07 |   |   | 27.6  | 22.1  | 30.9  | 0.8 | 0.2 | 0.7 | 0.1 |
| 9541 | 015d09 | AV641102 | HCL027g10 |   |   | 4.8   | 5.0   | 6.8   | 1.1 | 0.2 | 0.7 | 0.1 |
| 9542 | 138e06 | BP383797 | LCO48b11  |   |   | 7.9   | 9.8   | 14.0  | 1.3 | 0.4 | 0.7 | 0.2 |
| 9543 | 006f10 | AV390277 | CM045a02  |   |   | 11.6  | 9.1   | 15.0  | 0.8 | 0.3 | 0.7 | 0.4 |
| 9544 | 024c03 | AV626440 | LCL009b05 |   |   | 26.1  | 17.5  | 23.8  | 0.7 | 0.2 | 0.7 | 0.1 |
| 9545 | 110e07 | AV389453 | CM036g05  |   |   | 13.0  | 12.0  | 16.4  | 0.9 | 0.1 | 0.7 | 0.1 |
| 9546 | 126h09 | AV641561 | HCL036c10 |   |   | 11.2  | 9.4   | 12.9  | 0.8 | 0.1 | 0.7 | 0.2 |
| 9547 | 152g11 | AV630166 | LCL074f06 |   |   | 20.8  | 21.6  | 30.7  | 1.1 | 0.2 | 0.7 | 0.2 |
| 9548 | 169d11 | BP096979 | MXL068b05 |   |   | 9.3   | 7.4   | 10.6  | 0.9 | 0.4 | 0.7 | 0.3 |
| 9549 | 104g02 | AV395949 | CL53c03   |   |   | 9.0   | 10.3  | 15.5  | 1.2 | 0.4 | 0.7 | 0.3 |
| 9550 | 157e05 | BP086992 | MX022c12  |   |   | 12.4  | 8.4   | 12.2  | 0.7 | 0.2 | 0.7 | 0.3 |
| 9551 | 169h07 | BP097155 | MXL071a03 |   |   | 6.4   | 3.9   | 6.7   | 0.5 | 0.3 | 0.7 | 0.7 |
| 9552 | 103b06 | AV394855 | CL32c08   |   |   | 13.7  | 10.0  | 14.1  | 0.8 | 0.1 | 0.7 | 0.3 |
| 9553 | 164e11 | BP094797 | MXL029h01 |   |   | 26.0  | 24.4  | 33.9  | 0.9 | 0.2 | 0.7 | 0.0 |
| 9554 | 021h07 | AV623047 | LCO58b12  |   |   | 29.4  | 25.8  | 35.0  | 0.9 | 0.1 | 0.7 | 0.1 |
| 9555 | 033g09 | BP094928 | MXL032f10 |   |   | 19.8  | 11.4  | 15.5  | 0.6 | 0.1 | 0.7 | 0.1 |
| 9556 | 130c07 | AV643340 | HCL067h06 |   |   | 11.1  | 8.9   | 12.9  | 0.8 | 0.0 | 0.7 | 0.2 |
| 9557 | 161g11 | BP093340 | MXL007b02 |   |   | 28.1  | 24.4  | 33.1  | 0.9 | 0.3 | 0.7 | 0.2 |
| 9558 | 131a02 | BP383747 | HCL076b04 |   |   | 29.8  | 25.0  | 36.6  | 0.9 | 0.2 | 0.7 | 0.2 |
| 9559 | 035a11 | BP096555 | MXL060f08 |   |   | 65.4  | 53.9  | 78.1  | 0.8 | 0.1 | 0.7 | 0.2 |
| 9560 | 034b04 | BP095292 | MXL039e01 |   |   | 21.4  | 15.2  | 20.6  | 0.8 | 0.3 | 0.7 | 0.1 |
| 9561 | 153f06 | AV630577 | LCL081a04 |   |   | 16.8  | 13.2  | 18.3  | 0.8 | 0.1 | 0.7 | 0.1 |
| 9562 | 111e08 | AV390860 | CM048e06  |   |   | 94.2  | 75.5  | 101.3 | 0.8 | 0.0 | 0.7 | 0.1 |
| 9563 | 017d09 | AV643216 | HCL065g07 |   |   | 41.2  | 31.8  | 48.2  | 0.8 | 0.1 | 0.7 | 0.2 |
| 9564 | 028b12 | AV629756 | LCL065d01 |   |   | 14.2  | 9.3   | 14.7  | 0.7 | 0.0 | 0.7 | 0.4 |
| 9565 | 131h10 | BP383757 | HCL087d10 |   |   | 19.5  | 15.5  | 24.3  | 0.8 | 0.1 | 0.7 | 0.3 |
| 9566 | 146e02 | AV627115 | LCL021c12 |   |   | 39.8  | 26.7  | 40.7  | 0.7 | 0.0 | 0.7 | 0.3 |
| 9567 | 104c06 | AV395700 | CL47a08   |   |   | 20.2  | 12.7  | 17.4  | 0.6 | 0.1 | 0.7 | 0.2 |
| 9568 | 107e02 | BP383672 | CM010b08  |   |   | 149.9 | 103.9 | 137.8 | 0.7 | 0.4 | 0.7 | 0.1 |
| 9569 | 031c08 | BP086706 | MX014h04  |   |   | 93.6  | 31.3  | 43.3  | 0.3 | 0.1 | 0.7 | 0.5 |
| 9570 | 163d03 | BP094245 | MXL020a10 |   |   | 31.1  | 25.8  | 36.8  | 0.8 | 0.1 | 0.7 | 0.1 |
| 9571 | 103a11 | AV395039 | CL31e01   |   |   | 4.4   | 5.7   | 10.3  | 1.3 | 0.1 | 0.7 | 0.6 |
| 9572 | 124e04 | AV640163 | HCL011e02 |   |   | 24.1  | 36.5  | 51.4  | 1.5 | 0.3 | 0.7 | 0.2 |
| 9573 | 119d02 | AV634925 | HC039g03  |   |   | 32.2  | 17.8  | 29.3  | 0.5 | 0.4 | 0.7 | 0.6 |
| 9574 | 144c09 | AV626219 | LCL004e06 |   |   | 20.2  | 15.9  | 22.6  | 0.8 | 0.0 | 0.7 | 0.2 |
| 9575 | 029d05 | AV630808 | LCL084e12 |   |   | 17.5  | 14.8  | 23.5  | 0.9 | 0.2 | 0.7 | 0.4 |
| 9576 | 127f03 | AV641920 | HCL042d12 |   |   | 25.8  | 22.5  | 30.7  | 0.9 | 0.1 | 0.7 | 0.1 |
| 9577 | 141d08 | AV624464 | LCO78b03  |   |   | 5.5   | 33.6  | 44.2  | 6.8 | 4.4 | 0.7 | 0.2 |
| 9578 | 036b05 | BP097829 | MXL082a07 |   |   | 13.1  | 11.9  | 17.9  | 0.9 | 0.2 | 0.7 | 0.3 |
| 9579 | 151g09 | AV629688 | LCL063g09 |   |   | 22.0  | 16.9  | 23.3  | 0.8 | 0.1 | 0.7 | 0.0 |
| 9580 | 032d06 | BP093235 | MXL005d09 |   |   | 16.7  | 10.8  | 15.9  | 0.7 | 0.1 | 0.7 | 0.3 |
| 9581 | 159h05 | BP088176 | MX053d01  |   |   | 157.7 | 72.2  | 97.3  | 0.5 | 0.2 | 0.7 | 0.2 |
| 9582 | 112e04 | AV391930 | CM057f06  |   |   | 9.7   | 10.7  | 15.9  | 1.1 | 0.2 | 0.7 | 0.2 |
| 9583 | 165d04 | BP095177 | MXL037b12 |   |   | 12.9  | 10.0  | 14.5  | 0.8 | 0.2 | 0.7 | 0.2 |
| 9584 | 134a08 | AV618930 | LCO01e05  |   |   | 11.4  | 9.0   | 12.4  | 0.8 | 0.1 | 0.7 | 0.1 |
| 9585 | 111h12 | AV391302 | CM053c09  |   |   | 18.5  | 15.6  | 22.3  | 0.8 | 0.1 | 0.7 | 0.3 |
| 9586 | 162h06 | BP093990 | MXL016f06 |   |   | 5.6   | 5.9   | 8.6   | 1.0 | 0.5 | 0.7 | 0.6 |
| 9587 | 168g07 | BP096685 | MXL063a10 |   |   | 4.3   | 2.4   | 4.2   | 0.6 | 0.4 | 0.7 | 0.6 |
| 9588 | 147g05 | AV627671 | LCL030d01 |   |   | 16.5  | 14.4  | 19.9  | 0.9 | 0.2 | 0.7 | 0.1 |
| 9589 | 134f08 | AV619450 | LCO08e05  |   |   | 7.3   | 4.8   | 6.5   | 0.7 | 0.1 | 0.7 | 0.1 |
| 9590 | 130c02 | AV643310 | HCL067d03 |   |   | 50.4  | 46.7  | 68.3  | 0.9 | 0.1 | 0.7 | 0.2 |
| 9591 | 116h01 | AV631960 | HC002b11  |   |   | 18.3  | 12.8  | 17.5  | 0.7 | 0.2 | 0.7 | 0.1 |
| 9592 | 128d08 | BP383727 | HCL050d05 |   |   | 10.9  | 7.8   | 10.8  | 0.7 | 0.1 | 0.7 | 0.1 |
| 9593 | 162f08 | BP093871 | MXL015a01 |   |   | 33.3  | 24.1  | 39.4  | 0.7 | 0.1 | 0.7 | 0.3 |
| 9594 | 130d07 | AV643445 | HCL069g11 |   |   | 12.9  | 11.2  | 15.3  | 0.9 | 0.1 | 0.7 | 0.1 |
| 9595 | 106g05 | AV386557 | CM003b05  |   |   | 9.0   | 10.7  | 15.9  | 1.2 | 0.1 | 0.7 | 0.3 |
| 9596 | 168h03 | BP096713 | MXL063e10 |   |   | 31.6  | 28.3  | 45.5  | 0.9 | 0.3 | 0.7 | 0.5 |
| 9597 | 141g07 | AV624736 | LCO81h08  |   |   | 7.3   | 5.2   | 7.1   | 0.7 | 0.1 | 0.7 | 0.0 |
| 9598 | 104h05 | AV396066 | CL55a05   |   |   | 32.1  | 26.1  | 36.4  | 0.8 | 0.1 | 0.7 | 0.2 |
| 9599 | 167g09 | BP096196 | MXL054d08 |   |   | 7.8   | 4.3   | 6.8   | 0.5 | 0.3 | 0.7 | 0.6 |
| 9600 | 138g07 | AV622562 | LCO51c06  |   |   | 15.6  | 9.8   | 13.5  | 0.6 | 0.1 | 0.7 | 0.1 |
| 9601 | 169g12 | BP097135 | MXL070f09 |   |   | 10.1  | 20.7  | 29.3  | 2.1 | 0.5 | 0.7 | 0.1 |
| 9602 | 126f10 | AV641390 | HCL032g06 |   |   | 25.4  | 20.7  | 32.6  | 0.8 | 0.1 | 0.7 | 0.3 |
| 9603 | 031d09 | BP086869 | MX019b07  |   |   | 53.0  | 40.3  | 55.8  | 0.8 | 0.1 | 0.7 | 0.1 |
| 9604 | 170d06 | BP097409 | MXL075c02 |   |   | 10.5  | 7.8   | 10.8  | 0.7 | 0.1 | 0.7 | 0.1 |
| 9605 | 024a03 | AV626267 | LCL005e08 |   |   | 23.5  | 18.6  | 25.8  | 0.8 | 0.0 | 0.7 | 0.1 |
| 9606 | 112b01 | AV391448 | CM054e09  |   |   | 30.8  | 28.7  | 40.4  | 1.0 | 0.2 | 0.7 | 0.2 |
| 9607 | 128c05 | AV642251 | HCL048d02 |   |   | 15.5  | 13.0  | 19.0  | 0.8 | 0.1 | 0.7 | 0.2 |
| 9608 | 011d12 | AV634913 | HC039f02  |   |   | 17.6  | 8.9   | 12.8  | 0.5 | 0.0 | 0.7 | 0.2 |
| 9609 | 166g11 | BP095767 | MXL047b01 |   |   | 8.8   | 9.7   | 13.0  | 1.0 | 0.5 | 0.7 | 0.5 |
| 9610 | 164h06 | BP094974 | MXL033f06 |   |   | 4.7   | 3.6   | 5.4   | 0.7 | 0.3 | 0.7 | 0.5 |
| 9611 | 114e12 | AV388590 | CM078c09  |   |   | 10.0  | 7.1   | 9.9   | 0.7 | 0.1 | 0.7 | 0.2 |
| 9612 | 025f10 | AV627717 | LCL031a08 |   |   | 18.4  | 14.6  | 24.8  | 0.8 | 0.1 | 0.7 | 0.3 |
| 9613 | 126h11 | AV641586 | HCL036h01 |   |   | 25.7  | 17.5  | 32.8  | 0.7 | 0.1 | 0.7 | 0.5 |
| 9614 | 146d08 | AV627094 | LCL021a05 |   |   | 23.4  | 17.2  | 26.7  | 0.7 | 0.0 | 0.7 | 0.3 |
| 9615 | 149g10 | AV628664 | LCL045c10 |   |   | 19.9  | 15.4  | 21.8  | 0.8 | 0.1 | 0.7 | 0.3 |
| 9616 | 153g04 | AV630629 | LCL081g07 |   |   | 30.4  | 24.9  | 35.5  | 0.8 | 0.2 | 0.7 | 0.1 |
| 9617 | 165h08 | BP095391 | MXL041b03 |   |   | 9.0   | 6.8   | 10.4  | 0.6 | 0.3 | 0.7 | 0.7 |
| 9618 | 148d10 | AV628022 | LCL035e07 |   |   | 45.5  | 42.1  | 67.6  | 0.9 | 0.1 | 0.7 | 0.3 |
| 9619 | 153c01 | AV630385 | LCL078b02 |   |   | 23.5  | 16.7  | 23.3  | 0.7 | 0.1 | 0.7 | 0.1 |
| 9620 | 127a03 | AV641602 | HCL037b08 |   |   | 9.5   | 7.8   | 11.0  | 0.8 | 0.0 | 0.7 | 0.2 |
| 9621 | 005e10 | AV387564 | CM026c04  |   |   | 35.5  | 16.3  | 22.5  | 0.5 | 0.1 | 0.7 | 0.2 |
| 9622 | 126c07 | AV641125 | HCL028b08 |   |   | 22.1  | 18.4  | 26.0  | 0.8 | 0.1 | 0.7 | 0.1 |
| 9623 | 156g06 | BP086333 | MX006g04  |   |   | 7.9   | 5.7   | 8.5   | 0.7 | 0.3 | 0.7 | 0.3 |
| 9624 | 006h06 | AV390647 | CM047c03  |   |   | 24.4  | 14.5  | 20.1  | 0.6 | 0.1 | 0.7 | 0.1 |
| 9625 | 002f10 | AV397807 | CL45g10   |   |   | 8.9   | 4.6   | 6.5   | 0.5 | 0.1 | 0.7 | 0.2 |
| 9626 | 166g04 | BP095741 | MXL046f10 |   |   | 12.2  | 8.6   | 13.1  | 0.7 | 0.3 | 0   |     |

|      | A      | B        | C         | D | E | F     | G     | H     | I   | J   | K   | L   |
|------|--------|----------|-----------|---|---|-------|-------|-------|-----|-----|-----|-----|
| 9628 | 155h02 | AV631632 | LCL097c08 |   |   | 13.8  | 6.2   | 12.2  | 0.5 | 0.3 | 0.7 | 0.6 |
| 9629 | 101b08 | AV397600 | CL02f09   |   |   | 12.9  | 10.2  | 14.2  | 0.8 | 0.1 | 0.7 | 0.1 |
| 9630 | 154f09 | AV631075 | LCL088d09 |   |   | 18.0  | 17.7  | 24.8  | 1.0 | 0.1 | 0.7 | 0.1 |
| 9631 | 163g11 | BP094515 | MXL024c11 |   |   | 5.8   | 4.7   | 6.5   | 0.7 | 0.4 | 0.7 | 0.5 |
| 9632 | 146d06 | AV627084 | LCL020g12 |   |   | 63.5  | 50.9  | 74.5  | 0.8 | 0.1 | 0.7 | 0.1 |
| 9633 | 133c04 | AV644992 | HCL096f10 |   |   | 10.3  | 9.0   | 12.8  | 0.9 | 0.3 | 0.7 | 0.1 |
| 9634 | 172g11 | BP098549 | MXL095c02 |   |   | 17.9  | 11.9  | 16.1  | 0.6 | 0.3 | 0.7 | 0.4 |
| 9635 | 137a02 | AV621097 | LC031b10  |   |   | 8.7   | 5.6   | 7.8   | 0.7 | 0.1 | 0.7 | 0.1 |
| 9636 | 104a01 | AV395559 | CL43d08   |   |   | 5.8   | 10.2  | 15.6  | 1.8 | 0.3 | 0.7 | 0.3 |
| 9637 | 101h05 | AV394021 | CL16h07   |   |   | 283.5 | 182.4 | 289.8 | 0.6 | 0.0 | 0.7 | 0.3 |
| 9638 | 147h08 | AV627759 | LCL031f04 |   |   | 17.8  | 14.7  | 20.1  | 0.8 | 0.2 | 0.7 | 0.2 |
| 9639 | 106b01 | AV397096 | CL75b05   |   |   | 17.1  | 20.0  | 28.3  | 1.3 | 0.8 | 0.7 | 0.4 |
| 9640 | 033b07 | BP094124 | MXL018e03 |   |   | 78.3  | 44.6  | 59.2  | 0.6 | 0.3 | 0.7 | 0.2 |
| 9641 | 146f06 | AV627173 | LCL022b11 |   |   | 21.6  | 14.9  | 21.2  | 0.7 | 0.1 | 0.7 | 0.1 |
| 9642 | 121g04 | AV637469 | HC073e05  |   |   | 13.4  | 10.8  | 15.2  | 0.8 | 0.1 | 0.7 | 0.1 |
| 9643 | 151b06 | AV629358 | LCL057d01 |   |   | 12.7  | 10.4  | 15.3  | 0.8 | 0.1 | 0.7 | 0.2 |
| 9644 | 133d10 | AV645060 | HCL097f04 |   |   | 9.4   | 7.0   | 10.6  | 0.7 | 0.1 | 0.7 | 0.2 |
| 9645 | 163e05 | BP094316 | MXL021b04 |   |   | 23.4  | 20.2  | 33.8  | 0.9 | 0.1 | 0.7 | 0.3 |
| 9646 | 115c10 | AV390157 | CM086e02  |   |   | 741.9 | 476.3 | 670.8 | 0.7 | 0.4 | 0.7 | 0.3 |
| 9647 | 148e04 | AV628052 | LCL036a05 |   |   | 25.9  | 24.0  | 35.9  | 0.9 | 0.1 | 0.7 | 0.2 |
| 9648 | 151f07 | AV629616 | LCL062a06 |   |   | 6.7   | 5.4   | 7.7   | 0.8 | 0.2 | 0.7 | 0.1 |
| 9649 | 114a11 | AV388827 | CM073a08  |   |   | 47.1  | 59.8  | 88.7  | 1.3 | 0.1 | 0.7 | 0.3 |
| 9650 | 168g09 | BP096701 | MXL063d02 |   |   | 10.2  | 6.4   | 9.7   | 0.7 | 0.4 | 0.7 | 0.4 |
| 9651 | 163d10 | BP094261 | MXL020c04 |   |   | 25.5  | 13.6  | 20.4  | 0.6 | 0.1 | 0.7 | 0.3 |
| 9652 | 133h06 | AV645277 | HCL100e07 |   |   | 42.3  | 36.8  | 63.9  | 0.9 | 0.2 | 0.7 | 0.4 |
| 9653 | 032b08 | BP093027 | MXL002d02 |   |   | 17.3  | 9.5   | 14.4  | 0.5 | 0.1 | 0.7 | 0.4 |
| 9654 | 015e08 | AV641164 | HCL028h12 |   |   | 13.2  | 10.0  | 14.4  | 0.8 | 0.3 | 0.7 | 0.3 |
| 9655 | 109c12 | AV388061 | CM025d08  |   |   | 11.8  | 8.2   | 12.3  | 0.7 | 0.1 | 0.7 | 0.3 |
| 9656 | 128a08 | AV642140 | HCL046c08 |   |   | 12.0  | 10.4  | 16.0  | 0.9 | 0.2 | 0.7 | 0.3 |
| 9657 | 034d08 | BP095743 | MXL046g01 |   |   | 26.2  | 30.0  | 42.6  | 1.2 | 0.2 | 0.7 | 0.2 |
| 9658 | 145h12 | AV626929 | LCL018c05 |   |   | 9.8   | 6.3   | 10.4  | 0.7 | 0.2 | 0.7 | 0.4 |
| 9659 | 002a10 | AV394738 | CL30b03   |   |   | 4.0   | 3.5   | 5.3   | 0.9 | 0.2 | 0.7 | 0.3 |
| 9660 | 164f05 | BP094830 | MXL030e07 |   |   | 34.7  | 21.4  | 30.6  | 0.6 | 0.1 | 0.7 | 0.4 |
| 9661 | 101b10 | AV393411 | CL03a01   |   |   | 8.7   | 7.3   | 11.6  | 0.8 | 0.2 | 0.7 | 0.4 |
| 9662 | 132c04 | AV644617 | HCL091c09 |   |   | 29.6  | 24.7  | 37.2  | 0.8 | 0.1 | 0.7 | 0.2 |
| 9663 | 021c10 | AV622184 | LC046c06  |   |   | 130.4 | 97.3  | 135.8 | 0.8 | 0.2 | 0.7 | 0.2 |
| 9664 | 124e10 | AV640195 | HCL011h11 |   |   | 9.7   | 6.4   | 9.9   | 0.7 | 0.2 | 0.7 | 0.2 |
| 9665 | 013f11 | AV639204 | HC096c10  |   |   | 45.8  | 22.4  | 32.0  | 0.5 | 0.2 | 0.7 | 0.4 |
| 9666 | 125g08 | AV640795 | HCL022f03 |   |   | 17.3  | 13.5  | 19.3  | 0.8 | 0.0 | 0.7 | 0.2 |
| 9667 | 160g09 | BP089284 | MX204d06  |   |   | 23.1  | 14.4  | 23.9  | 0.8 | 0.6 | 0.7 | 0.5 |
| 9668 | 121d08 | AV637128 | HC069b01  |   |   | 11.6  | 8.6   | 11.9  | 0.7 | 0.1 | 0.7 | 0.1 |
| 9669 | 161d03 | BP093101 | MXL003d05 |   |   | 17.8  | 17.7  | 25.6  | 1.0 | 0.3 | 0.7 | 0.1 |
| 9670 | 116a06 | AV391906 | CM094e01  |   |   | 24.1  | 19.3  | 30.9  | 0.8 | 0.2 | 0.7 | 0.3 |
| 9671 | 119f04 | AV635252 | HC043h05  |   |   | 53.1  | 34.9  | 49.3  | 0.7 | 0.1 | 0.7 | 0.2 |
| 9672 | 024b08 | AV626374 | LCL008a09 |   |   | 68.4  | 56.2  | 83.4  | 0.8 | 0.1 | 0.7 | 0.2 |
| 9673 | 003g06 | AV396481 | CL74a03   |   |   | 9.2   | 8.3   | 11.8  | 0.9 | 0.1 | 0.7 | 0.2 |
| 9674 | 106d10 | AV397302 | CL80e05   |   |   | 10.9  | 7.6   | 12.2  | 0.7 | 0.1 | 0.7 | 0.3 |
| 9675 | 119h04 | AV635542 | HC047f09  |   |   | 16.1  | 13.9  | 19.4  | 0.9 | 0.2 | 0.7 | 0.1 |
| 9676 | 024e10 | AV626647 | LCL012h09 |   |   | 23.4  | 17.9  | 26.8  | 0.8 | 0.1 | 0.7 | 0.2 |
| 9677 | 128b12 | AV642235 | HCL048a07 |   |   | 15.0  | 14.2  | 20.4  | 0.9 | 0.1 | 0.7 | 0.1 |
| 9678 | 024c02 | AV626435 | LCL009a02 |   |   | 3.8   | 2.5   | 3.5   | 0.7 | 0.4 | 0.7 | 0.2 |
| 9679 | 151b12 | AV629381 | LCL057f10 |   |   | 38.9  | 24.7  | 40.8  | 0.6 | 0.1 | 0.7 | 0.3 |
| 9680 | 112b10 | AV391557 | CM055b11  |   |   | 147.7 | 104.9 | 147.9 | 0.7 | 0.0 | 0.7 | 0.0 |
| 9681 | 147e10 | AV627589 | LCL029b01 |   |   | 17.0  | 11.0  | 15.4  | 0.7 | 0.2 | 0.7 | 0.1 |
| 9682 | 011e10 | AV635161 | HC042f10  |   |   | 113.0 | 84.7  | 118.1 | 0.8 | 0.2 | 0.7 | 0.0 |
| 9683 | 034b10 | BP095415 | MXL041d10 |   |   | 8.3   | 9.8   | 13.6  | 1.2 | 0.2 | 0.7 | 0.1 |
| 9684 | 163h03 | BP094539 | MXL024f07 |   |   | 2.7   | 2.2   | 4.1   | 0.8 | 0.1 | 0.7 | 0.6 |
| 9685 | 001f11 | AV394184 | CL19e03   |   |   | 3.7   | 3.3   | 4.5   | 0.9 | 0.2 | 0.7 | 0.1 |
| 9686 | 002b12 | AV394918 | CL34b04   |   |   | 43.7  | 25.4  | 36.0  | 0.6 | 0.1 | 0.7 | 0.1 |
| 9687 | 170g11 | BP097603 | MXL078d01 |   |   | 13.5  | 12.6  | 20.8  | 0.9 | 0.2 | 0.7 | 0.5 |
| 9688 | 018d10 | AV644525 | HCL090a09 |   |   | 6.2   | 5.7   | 9.0   | 1.0 | 0.6 | 0.7 | 0.4 |
| 9689 | 131d06 | AV644088 | HCL081e12 |   |   | 14.2  | 11.1  | 18.3  | 0.8 | 0.2 | 0.7 | 0.3 |
| 9690 | 170e09 | BP097463 | MXL076b03 |   |   | 10.1  | 8.7   | 12.9  | 0.8 | 0.1 | 0.7 | 0.3 |
| 9691 | 109b08 | AV388223 | CM024d05  |   |   | 97.3  | 52.6  | 84.4  | 0.5 | 0.1 | 0.7 | 0.3 |
| 9692 | 103b05 | AV394831 | CL32b05   |   |   | 7.3   | 4.9   | 6.6   | 0.6 | 0.2 | 0.7 | 0.2 |
| 9693 | 139f08 | AV623252 | LC061b01  |   |   | 25.2  | 13.8  | 20.3  | 0.5 | 0.0 | 0.7 | 0.3 |
| 9694 | 024e12 | AV626652 | LCL013a07 |   |   | 17.5  | 12.9  | 20.2  | 0.7 | 0.1 | 0.7 | 0.3 |
| 9695 | 141f01 | AV624595 | LC079h07  |   |   | 17.6  | 12.7  | 17.8  | 0.7 | 0.1 | 0.7 | 0.1 |
| 9696 | 167h03 | BP096224 | MXL054h03 |   |   | 559.0 | 394.5 | 553.6 | 0.7 | 0.0 | 0.7 | 0.0 |
| 9697 | 164g09 | BP094926 | MXL032f08 |   |   | 21.7  | 11.7  | 23.7  | 0.6 | 0.4 | 0.7 | 0.7 |
| 9698 | 030b08 | AV631445 | LCL094a09 |   |   | 9.6   | 10.2  | 14.4  | 1.1 | 0.3 | 0.7 | 0.0 |
| 9699 | 008b09 | AV393031 | CM066g07  |   |   | 81.1  | 59.8  | 83.0  | 0.7 | 0.1 | 0.7 | 0.1 |
| 9700 | 022d06 | AV623779 | LC068e06  |   |   | 22.0  | 15.6  | 22.9  | 0.7 | 0.0 | 0.7 | 0.1 |
| 9701 | 167d09 | BP096048 | MXL051f10 |   |   | 5.6   | 5.3   | 7.5   | 1.0 | 0.2 | 0.7 | 0.2 |
| 9702 | 172h11 | BP098594 | MXL096a05 |   |   | 2.9   | 3.1   | 4.7   | 1.1 | 0.2 | 0.7 | 0.4 |
| 9703 | 150h06 | AV629246 | LCL055b07 |   |   | 23.0  | 23.0  | 34.1  | 1.0 | 0.1 | 0.7 | 0.2 |
| 9704 | 027e12 | AV629272 | LCL055f11 |   |   | 8.5   | 5.7   | 8.3   | 0.7 | 0.1 | 0.7 | 0.1 |
| 9705 | 011d01 | AV634750 | HC037d10  |   |   | 8.6   | 10.0  | 14.1  | 1.2 | 0.4 | 0.7 | 0.2 |
| 9706 | 150g02 | AV629130 | LCL052g02 |   |   | 25.7  | 20.7  | 31.4  | 0.8 | 0.1 | 0.7 | 0.2 |
| 9707 | 164d10 | BP094748 | MXL028f10 |   |   | 13.9  | 8.8   | 12.7  | 0.7 | 0.2 | 0.7 | 0.2 |
| 9708 | 126a05 | AV640959 | HCL025d06 |   |   | 29.3  | 22.5  | 35.7  | 0.8 | 0.0 | 0.7 | 0.3 |
| 9709 | 024d11 | AV626572 | LCL011f06 |   |   | 19.4  | 15.9  | 24.0  | 0.8 | 0.1 | 0.7 | 0.3 |
| 9710 | 117h11 | AV633267 | HC018g03  |   |   | 23.0  | 13.2  | 18.6  | 0.6 | 0.2 | 0.7 | 0.2 |
| 9711 | 153b09 | AV630372 | LCL077h10 |   |   | 22.6  | 17.4  | 24.6  | 0.8 | 0.1 | 0.7 | 0.1 |
| 9712 | 140f03 | AV623952 | LC070h08  |   |   | 11.8  | 7.5   | 10.8  | 0.7 | 0.2 | 0.7 | 0.2 |
| 9713 | 160h05 | BP089371 | MX206a05  |   |   | 8.0   | 6.4   | 10.6  | 0.8 | 0.2 | 0.7 | 0.5 |
| 9714 | 124e07 | AV640187 | HCL011h01 |   |   | 20.0  | 13.5  | 21.3  | 0.7 | 0.1 | 0.7 | 0.3 |
| 9715 | 129c08 | AV642781 | HCL057h02 |   |   | 12.0  | 8.4   | 12.1  | 0.7 | 0.1 | 0.7 | 0.1 |
| 9716 | 170g04 | BP097569 | MXL077h07 |   |   | 6.5   | 4.2   | 6.8   | 0.6 | 0.2 | 0.7 | 0.5 |
| 9717 | 103e10 | AV395178 | CL39a04   |   |   | 9.0   | 7.1   | 10.2  | 0.8 | 0.1 | 0.7 | 0.2 |
| 9718 | 114f01 | AV388540 | CM078d09  |   |   | 11.5  | 10.6  | 15.4  | 1.0 | 0.2 | 0.7 | 0.1 |
| 9719 | 171e08 | BP097979 | MXL084e07 |   |   | 14.1  | 10.7  | 17.2  | 0.8 | 0.1 | 0.7 | 0.3 |
| 9720 | 156d04 | BP086067 | MX001c08  |   |   | 37.5  | 20.8  | 34.7  | 0.5 | 0.1 | 0.7 | 0.3 |
| 9721 | 145e01 | AV626713 | LCL014b06 |   |   | 19.7  | 12.5  | 18.2  | 0.6 | 0.1 | 0.7 | 0.2 |
| 9722 | 025g10 | AV627849 | LCL032h06 |   |   | 9.9   | 9.1   | 13.1  | 0.9 | 0.1 | 0.7 | 0.1 |
| 9723 | 160e03 | BP088678 | MX066d03  |   |   | 11.2  | 11.7  | 16.3  | 1.0 | 0.1 | 0.7 | 0.2 |
| 9724 | 171d08 | BP097928 | MXL083f11 |   |   | 14.5  | 12.6  | 17.8  | 0.9 | 0.2 | 0.7 | 0.1 |
| 9725 | 001e07 | AV393955 | CL15d03   |   |   | 45.1  | 45.2  | 64.9  | 1.0 | 0.2 | 0.7 | 0.2 |
| 9726 | 160d04 | BP088572 | MX063h11  |   |   | 74.3  | 33.0  | 56.6  | 0.5 | 0.0 | 0.7 | 0.5 |
| 9727 | 168e02 | BP096536 | MXL060d03 |   |   | 7.0   | 5.6   | 8.6   | 0.9 | 0.3 | 0.7 | 0.3 |
| 9728 | 131g04 | BP383755 | HCL085e09 |   |   | 19.5  | 16.5  | 25.3  | 0.8 | 0.1 | 0.7 | 0.3 |
| 9729 | 145g09 | AV626857 | LCL016g06 |   |   | 11.8  | 9.6   | 13.1  | 0.8 | 0.0 | 0.7 | 0.1 |
| 9730 | 161d09 | BP093145 | MXL004a11 |   |   | 19.8  | 15.2  | 22.7  | 0.8 | 0.1 | 0.7 | 0.2 |
| 9731 | 159g01 | BP088016 | MX049e05  |   |   | 5.5   | 2.8   | 4.7   | 0.5 | 0.2 | 0.7 | 0.5 |
| 9732 | 162d02 | BP093670 | MXL011g11 |   |   | 12.8  | 9.7   | 13.8  | 0.7 | 0.2 | 0.7 | 0.3 |
| 9733 | 012c08 | AV636456 | HC059g02  |   |   | 8.6   | 8.6   | 12.2  | 1.0 | 0.2 |     |     |

|      | A      | B        | C          | D | E | F     | G     | H     | I     | J   | K   | L   |
|------|--------|----------|------------|---|---|-------|-------|-------|-------|-----|-----|-----|
| 9735 | 112c02 | AV391630 | CM055d08   |   |   | 12.8  | 15.0  | 21.6  | 1.3   | 0.4 | 0.7 | 0.1 |
| 9736 | 147h03 | AV627727 | LCL031b09  |   |   | 36.9  | 26.6  | 40.6  | 0.7   | 0.1 | 0.7 | 0.2 |
| 9737 | 107f08 | AV386912 | CM011f09   |   |   | 675.0 | 385.4 | 564.2 | 0.6   | 0.4 | 0.7 | 0.4 |
| 9738 | 144e09 | AV626288 | LCL005h02  |   |   | 30.6  | 23.1  | 34.1  | 0.8   | 0.1 | 0.7 | 0.1 |
| 9739 | 139g12 | AV623404 | LC063c10   |   |   | 58.7  | 50.2  | 76.4  | 0.9   | 0.3 | 0.7 | 0.2 |
| 9740 | 145d02 | AV626644 | LCL012h04  |   |   | 10.1  | 8.6   | 13.9  | 0.9   | 0.3 | 0.7 | 0.3 |
| 9741 | 152g01 | AV630087 | LCL072g12  |   |   | 32.7  | 26.0  | 37.5  | 0.8   | 0.1 | 0.7 | 0.2 |
| 9742 | 132c02 | AV644582 | HCL090h04  |   |   | 20.5  | 18.5  | 26.7  | 0.9   | 0.0 | 0.7 | 0.1 |
| 9743 | 151f10 | AV629625 | LCL062c03  |   |   | 6.2   | 5.3   | 7.6   | 0.9   | 0.3 | 0.7 | 0.1 |
| 9744 | 152c06 | AV629877 | LCL068b04  |   |   | 23.8  | 18.4  | 26.3  | 0.8   | 0.2 | 0.7 | 0.1 |
| 9745 | 147f10 | AV627648 | LCL030a05  |   |   | 16.8  | 13.3  | 19.0  | 0.8   | 0.1 | 0.7 | 0.0 |
| 9746 | 126e02 | AV641284 | HCL031a06  |   |   | 15.9  | 14.1  | 20.5  | 0.9   | 0.1 | 0.7 | 0.1 |
| 9747 | 156g08 | BP086345 | MX007a07   |   |   | 9.2   | 5.2   | 10.5  | 0.7   | 0.6 | 0.7 | 0.6 |
| 9748 | 005d09 | AV388250 | CM024b04   |   |   | 4.3   | 4.4   | 6.3   | 1.0   | 0.3 | 0.7 | 0.2 |
| 9749 | 170d09 | BP097417 | MXL075d03  |   |   | 20.6  | 19.1  | 31.6  | 0.9   | 0.1 | 0.7 | 0.3 |
| 9750 | 027g11 | AV629440 | LCL058g08  |   |   | 42.5  | 31.5  | 55.4  | 0.7   | 0.1 | 0.7 | 0.3 |
| 9751 | 164h02 | BP094960 | MXL033d04  |   |   | 16.3  | 10.3  | 14.6  | 0.7   | 0.3 | 0.7 | 0.3 |
| 9752 | 167g08 | BP096194 | MXL054d05  |   |   | 23.5  | 19.2  | 32.7  | 0.8   | 0.4 | 0.7 | 0.6 |
| 9753 | 015c09 | AV640976 | HCL025f05  |   |   | 7.1   | 6.1   | 8.8   | 0.9   | 0.1 | 0.7 | 0.1 |
| 9754 | 139f04 | AV623243 | LC060h11   |   |   | 9.5   | 7.3   | 10.7  | 0.8   | 0.1 | 0.7 | 0.2 |
| 9755 | 036d06 | BP098223 | MXL089f03  |   |   | 18.5  | 17.7  | 26.6  | 1.0   | 0.2 | 0.7 | 0.3 |
| 9756 | 166g10 | BP095765 | MXL047a09  |   |   | 23.3  | 11.2  | 17.9  | 0.4   | 0.1 | 0.7 | 0.6 |
| 9757 | 145h02 | BP383836 | LCL017b12  |   |   | 14.6  | 12.0  | 17.5  | 0.8   | 0.1 | 0.7 | 0.1 |
| 9758 | 031a10 | BP086497 | MX010b10   |   |   | 23.4  | 13.6  | 19.2  | 0.6   | 0.2 | 0.7 | 0.2 |
| 9759 | 002d09 | AV395212 | CL39h12    |   |   | 1.2   | 1.1   | 1.7   | 1.0   | 0.3 | 0.7 | 0.3 |
| 9760 | 128e01 | AV642403 | HCL051c02  |   |   | 52.2  | 37.5  | 55.2  | 0.7   | 0.1 | 0.7 | 0.1 |
| 9761 | 134c12 | AV619179 | LC004g11   |   |   | 97.8  | 109.4 | 158.8 | 1.1   | 0.1 | 0.7 | 0.1 |
| 9762 | 131f05 | AV644227 | HCL084d03  |   |   | 13.8  | 11.4  | 19.3  | 0.8   | 0.1 | 0.7 | 0.4 |
| 9763 | 110h11 | AV390009 | CM041c08   |   |   | 16.9  | 12.4  | 17.3  | 0.7   | 0.2 | 0.7 | 0.2 |
| 9764 | 151d09 | AV629481 | LCL059e12  |   |   | 20.0  | 15.9  | 23.7  | 0.8   | 0.1 | 0.7 | 0.2 |
| 9765 | 025f09 | AV627705 | LCL030h01  |   |   | 7.2   | 5.5   | 8.3   | 0.8   | 0.2 | 0.7 | 0.2 |
| 9766 | 131f11 | BP383754 | HCL084g07  |   |   | 12.1  | 13.0  | 19.0  | 1.1   | 0.3 | 0.7 | 0.1 |
| 9767 | 160g10 | BP089298 | MX204f01   |   |   | 7.9   | 6.8   | 12.8  | 0.8   | 0.1 | 0.7 | 0.5 |
| 9768 | 154e09 | AV631009 | LCL087e11  |   |   | 16.3  | 13.7  | 19.5  | 0.9   | 0.1 | 0.7 | 0.1 |
| 9769 | 025c10 | AV627263 | LCL024a03  |   |   | 13.7  | 9.8   | 14.3  | 0.7   | 0.1 | 0.7 | 0.2 |
| 9770 | 164h09 | BP094984 | MXL033g12  |   |   | 23.2  | 15.7  | 27.9  | 0.6   | 0.3 | 0.7 | 0.7 |
| 9771 | 007c10 | AV391428 | CM054d06   |   |   | 54.0  | 32.2  | 47.5  | 0.6   | 0.1 | 0.7 | 0.2 |
| 9772 | 163f01 | BP094380 | MXL022c06  |   |   | 29.3  | 21.9  | 31.2  | 0.8   | 0.1 | 0.7 | 0.1 |
| 9773 | 153f08 | AV630584 | LCL081b01  |   |   | 33.4  | 25.5  | 40.7  | 0.8   | 0.0 | 0.7 | 0.3 |
| 9774 | 167f12 | BP096155 | MXL053g03  |   |   | 16.4  | 13.7  | 20.6  | 0.8   | 0.1 | 0.7 | 0.2 |
| 9775 | 157h08 | BP087288 | MX030h04   |   |   | 67.3  | 51.7  | 103.6 | 0.8   | 0.4 | 0.7 | 0.5 |
| 9776 | 152d06 | AV629958 | LCL070a05  |   |   | 33.2  | 25.9  | 41.3  | 0.8   | 0.1 | 0.7 | 0.2 |
| 9777 | 104b02 | AV395758 | CL50g09    |   |   | 22.4  | 28.2  | 40.9  | 1.3   | 0.2 | 0.7 | 0.2 |
| 9778 | 159e09 | BP087850 | MX044h08   |   |   | 14.3  | 11.4  | 17.8  | 0.8   | 0.1 | 0.7 | 0.2 |
| 9779 | 145g08 | AV626855 | LCL016g04  |   |   | 32.5  | 25.9  | 41.5  | 0.8   | 0.1 | 0.7 | 0.3 |
| 9780 | 017c05 | AV643026 | HCL062e04  |   |   | 9.8   | 8.2   | 11.8  | 0.9   | 0.1 | 0.7 | 0.0 |
| 9781 | 145d06 | AV626678 | LCL013e08  |   |   | 27.9  | 19.7  | 28.8  | 0.7   | 0.1 | 0.7 | 0.1 |
| 9782 | 166d02 | BP095601 | MXL044d09  |   |   | 7.7   | 8.1   | 12.1  | 1.0   | 0.2 | 0.7 | 0.3 |
| 9783 | 016d06 | AV642112 | HCL045g11  |   |   | 15.1  | 8.2   | 13.8  | 0.5   | 0.1 | 0.7 | 0.4 |
| 9784 | 018g07 | AV619092 | LC003f09   |   |   | 10.0  | 7.3   | 16.7  | 0.7   | 0.2 | 0.7 | 0.5 |
| 9785 | 162h08 | BP093995 | MXL016f12  |   |   | 18.3  | 14.6  | 31.1  | 0.7   | 0.4 | 0.7 | 0.7 |
| 9786 | 160h03 | BP089365 | MX205h04   |   |   | 18.0  | 15.0  | 29.6  | 0.8   | 0.1 | 0.7 | 0.5 |
| 9787 | 111c08 | AV390371 | CM045f07   |   |   | 7.5   | 4.0   | 5.7   | 0.5   | 0.1 | 0.7 | 0.1 |
| 9788 | 147e09 | AV627588 | LCL029a11  |   |   | 26.2  | 19.0  | 28.7  | 0.7   | 0.0 | 0.7 | 0.2 |
| 9789 | 106f06 | AV397812 | CM002d10   |   |   | 12.0  | 8.0   | 11.5  | 0.7   | 0.1 | 0.7 | 0.2 |
| 9790 | 034f09 | BP096147 | MXL053e12  |   |   | 12.4  | 4.9   | 7.0   | 0.4   | 0.1 | 0.7 | 0.2 |
| 9791 | 129a06 | AV642642 | HCL055c03  |   |   | 18.9  | 14.9  | 25.1  | 0.8   | 0.1 | 0.7 | 0.3 |
| 9792 | 165h09 | BP095392 | MXL041b06  |   |   | 20.5  | 14.5  | 27.6  | 0.7   | 0.4 | 0.7 | 0.6 |
| 9793 | 106g04 | AV386548 | CM003b03_r |   |   | 13.1  | 13.5  | 19.7  | 1.0   | 0.2 | 0.7 | 0.1 |
| 9794 | 163d09 | BP094259 | MXL020b12  |   |   | 25.7  | 20.0  | 31.8  | 0.8   | 0.1 | 0.7 | 0.3 |
| 9795 | 131d03 | BP383750 | HCL081c10  |   |   | 11.1  | 10.2  | 14.9  | 0.9   | 0.3 | 0.7 | 0.1 |
| 9796 | 172f05 | BP098468 | MXL093g06  |   |   | 21.6  | 10.5  | 17.7  | 0.5   | 0.3 | 0.7 | 0.4 |
| 9797 | 172f04 | BP098452 | MXL093e12  |   |   | 24.1  | 16.9  | 27.7  | 0.7   | 0.1 | 0.7 | 0.4 |
| 9798 | 127c03 | AV641702 | HCL038h11  |   |   | 19.6  | 16.6  | 25.5  | 0.9   | 0.1 | 0.7 | 0.2 |
| 9799 | 164e06 | BP094772 | MXL029c03  |   |   | 45.5  | 45.7  | 70.4  | 1.0   | 0.3 | 0.7 | 0.1 |
| 9800 | 102a02 | AV394131 | CL17e03    |   |   | 9.1   | 10.3  | 18.0  | 1.2   | 0.4 | 0.7 | 0.4 |
| 9801 | 159h08 | BP088190 | MX053f12   |   |   | 10.6  | 8.9   | 15.2  | 0.8   | 0.4 | 0.7 | 0.5 |
| 9802 | 140f08 | AV623990 | LC071d11   |   |   | 27.3  | 22.2  | 35.2  | 0.8   | 0.1 | 0.7 | 0.2 |
| 9803 | 024d08 | AV626541 | LCL010h06  |   |   | 8.6   | 6.0   | 9.0   | 0.7   | 0.1 | 0.7 | 0.2 |
| 9804 | 001b10 | AV393624 | CL06d02    |   |   | 1.6   | 0.9   | 1.3   | 0.5   | 0.2 | 0.7 | 0.3 |
| 9805 | 132d05 | AV644682 | HCL092b07  |   |   | 8.8   | 7.5   | 11.4  | 0.9   | 0.1 | 0.7 | 0.2 |
| 9806 | 147d07 | AV627535 | LCL028b08  |   |   | 13.0  | 10.2  | 15.0  | 0.8   | 0.1 | 0.7 | 0.1 |
| 9807 | 156e06 | BP086173 | MX003c12   |   |   | 26.4  | 23.2  | 34.2  | 0.9   | 0.2 | 0.7 | 0.1 |
| 9808 | 158e08 | BP087660 | MX040e06   |   |   | 16.0  | 12.0  | 19.0  | 0.8   | 0.1 | 0.7 | 0.2 |
| 9809 | 140g07 | AV624071 | LC072e10   |   |   | 19.6  | 14.9  | 25.0  | 0.8   | 0.2 | 0.7 | 0.4 |
| 9810 | 167f06 | BP096139 | MXL053d06  |   |   | 15.3  | 10.7  | 16.1  | 0.7   | 0.3 | 0.7 | 0.4 |
| 9811 | 144g09 | AV626392 | LCL008d01  |   |   | 15.2  | 14.4  | 21.0  | 1.0   | 0.1 | 0.7 | 0.1 |
| 9812 | 165h10 | BP095395 | MXL041b09  |   |   | 63.7  | 30.5  | 44.5  | 0.5   | 0.2 | 0.7 | 0.0 |
| 9813 | 106c10 | AV397274 | CL77h11    |   |   | 28.3  | 27.6  | 40.1  | 1.0   | 0.1 | 0.7 | 0.0 |
| 9814 | 147f11 | AV627659 | LCL030b07  |   |   | 69.3  | 35.6  | 51.4  | 0.5   | 0.2 | 0.7 | 0.0 |
| 9815 | 172d05 | BP098356 | MXL092b06  |   |   | 25.0  | 16.4  | 24.3  | 0.7   | 0.1 | 0.7 | 0.1 |
| 9816 | 130f10 | AV643638 | HCL073c01  |   |   | 40.9  | 32.3  | 46.1  | 0.8   | 0.1 | 0.7 | 0.1 |
| 9817 | 017b11 | AV642971 | HCL061d10  |   |   | 3.6   | 2.6   | 3.9   | 0.8   | 0.2 | 0.7 | 0.2 |
| 9818 | 130e01 | AV643481 | HCL070d04  |   |   | 67.9  | 58.5  | 89.6  | 0.9   | 0.1 | 0.7 | 0.2 |
| 9819 | 011f11 | AV635307 | HC044f11   |   |   | 20.4  | 25.4  | 38.8  | 1.3   | 0.6 | 0.7 | 0.3 |
| 9820 | 131a08 | AV643831 | HCL076g12  |   |   | 8.9   | 7.0   | 10.8  | 0.8   | 0.1 | 0.7 | 0.2 |
| 9821 | 101e12 | AV393784 | CL11d03    |   |   | 12.1  | 10.7  | 16.4  | 0.9   | 0.1 | 0.7 | 0.2 |
| 9822 | 164g02 | BP094890 | MXL031g08  |   |   | 25.2  | 9.8   | 14.4  | 0.4   | 0.1 | 0.7 | 0.2 |
| 9823 | 119b08 | AV634680 | HC036d07   |   |   | 4.8   | 2.8   | 4.7   | 0.6   | 0.2 | 0.7 | 0.4 |
| 9824 | 029c10 | AV630768 | LCL084a10  |   |   | 5.7   | 3.3   | 4.9   | 0.6   | 0.0 | 0.7 | 0.2 |
| 9825 | 168d12 | BP096526 | MXL060b12  |   |   | 13.0  | 13.0  | 18.6  | 1.0   | 0.1 | 0.7 | 0.3 |
| 9826 | 022g08 | AV624251 | LC075b01   |   |   | 16.3  | 18.2  | 26.7  | 1.1   | 0.3 | 0.7 | 0.1 |
| 9827 | 154d10 | AV630968 | LCL087a06  |   |   | 27.6  | 25.6  | 37.7  | 0.9   | 0.1 | 0.7 | 0.1 |
| 9828 | 001g11 | AV394442 | CL24a02    |   |   | 8.5   | 10.2  | 14.6  | 1.2   | 0.5 | 0.7 | 0.3 |
| 9829 | 155g07 | AV631595 | LCL096f07  |   |   | 26.9  | 24.9  | 40.4  | 1.0   | 0.5 | 0.7 | 0.3 |
| 9830 | 103h11 | AV395554 | CL43c04    |   |   | 20.6  | 15.7  | 27.5  | 0.8   | 0.2 | 0.7 | 0.4 |
| 9831 | 118e06 | AV633898 | HC026f08   |   |   | 14.5  | 7.7   | 11.7  | 0.5   | 0.2 | 0.7 | 0.3 |
| 9832 | 125e11 | AV640691 | HCL020g07  |   |   | 8.3   | 6.2   | 9.3   | 0.8   | 0.2 | 0.7 | 0.2 |
| 9833 | 013d09 | AV638662 | HC089b08   |   |   | 14.7  | 14.4  | 21.6  | 1.0   | 0.3 | 0.7 | 0.1 |
| 9834 | 144f10 | AV626320 | LCL006h03  |   |   | 35.4  | 24.1  | 35.2  | 0.7   | 0.2 | 0.7 | 0.1 |
| 9835 | 016c09 | AV641970 | HCL043c03  |   |   | 3.1   | 2.9   | 4.3   | 0.9   | 0.2 | 0.7 | 0.1 |
| 9836 | 105a01 | AV396084 | CL56b04    |   |   | 10.2  | 13.4  | 19.6  | 1.4   | 0.6 | 0.7 | 0.1 |
| 9837 | 129b12 | AV642743 | HCL057b01  |   |   | 22.9  | 18.9  | 33.4  | 0.8   | 0.1 | 0.7 | 0.3 |
| 9838 | 163e09 | BP094343 | MXL021e09  |   |   | 29.5  | 24.3  | 35.6  | 0.9   | 0.3 | 0.7 | 0.1 |
| 9839 | 145g12 | AV626875 | LCL017b02  |   |   | 35.0  | 27.0  | 46.5  | 0.8   | 0.1 | 0.7 | 0.3 |
| 9840 | 124e08 | AV640191 | HCL011h07  |   |   | 6.7   | 5.1   | 7.8   | 0.8</ |     |     |     |



|      | A      | B        | C         | D | E | F      | G     | H     | I   | J   | K   | L   |
|------|--------|----------|-----------|---|---|--------|-------|-------|-----|-----|-----|-----|
| 9842 | 131g06 | AV644297 | HCL085g07 |   |   | 15.8   | 11.7  | 18.6  | 0.7 | 0.0 | 0.7 | 0.3 |
| 9843 | 035c04 | BP098813 | MXL065c11 |   |   | 11.0   | 6.6   | 11.1  | 0.6 | 0.2 | 0.7 | 0.3 |
| 9844 | 162d01 | BP093667 | MXL011g04 |   |   | 58.1   | 27.7  | 40.8  | 0.5 | 0.1 | 0.7 | 0.1 |
| 9845 | 130e06 | AV643532 | HCL071c05 |   |   | 20.5   | 15.1  | 22.4  | 0.7 | 0.1 | 0.7 | 0.1 |
| 9846 | 012e08 | AV637028 | HC06707   |   |   | 7.5    | 5.8   | 8.8   | 0.8 | 0.3 | 0.7 | 0.3 |
| 9847 | 108b05 | AV387472 | CM016h02  |   |   | 63.7   | 38.0  | 55.7  | 0.6 | 0.2 | 0.7 | 0.1 |
| 9848 | 172g04 | BP098516 | MXL094e07 |   |   | 22.9   | 13.1  | 26.0  | 0.6 | 0.3 | 0.7 | 0.6 |
| 9849 | 158g08 | BP087697 | MX041f10  |   |   | 6.3    | 3.8   | 6.2   | 0.6 | 0.3 | 0.7 | 0.5 |
| 9850 | 157g07 | BP087148 | MX026g05  |   |   | 10.0   | 4.4   | 7.0   | 0.5 | 0.2 | 0.7 | 0.4 |
| 9851 | 128d02 | AV642313 | HCL049e11 |   |   | 11.5   | 8.3   | 13.3  | 0.7 | 0.1 | 0.7 | 0.2 |
| 9852 | 104g06 | AV395970 | CL53g01   |   |   | 21.2   | 16.3  | 24.9  | 0.8 | 0.1 | 0.7 | 0.2 |
| 9853 | 125g09 | AV640800 | HCL022f09 |   |   | 15.2   | 13.4  | 21.5  | 0.9 | 0.1 | 0.7 | 0.3 |
| 9854 | 144h12 | AV626448 | LCL009c04 |   |   | 34.5   | 27.9  | 41.4  | 0.8 | 0.1 | 0.7 | 0.2 |
| 9855 | 159g11 | BP088114 | MX052a02  |   |   | 16.9   | 13.7  | 21.1  | 0.8 | 0.3 | 0.7 | 0.3 |
| 9856 | 165g05 | BP095339 | MXL040b10 |   |   | 33.5   | 19.2  | 34.7  | 0.6 | 0.3 | 0.7 | 0.5 |
| 9857 | 027c02 | AV629046 | LCL050h06 |   |   | 30.8   | 13.2  | 20.1  | 0.4 | 0.0 | 0.7 | 0.2 |
| 9858 | 145d07 | AV626686 | LCL013g02 |   |   | 23.2   | 18.4  | 28.6  | 0.8 | 0.1 | 0.7 | 0.2 |
| 9859 | 126c02 | AV641095 | HCL027f11 |   |   | 21.7   | 19.0  | 29.5  | 0.9 | 0.1 | 0.7 | 0.2 |
| 9860 | 128c07 | AV642261 | HCL048f10 |   |   | 23.9   | 18.4  | 29.0  | 0.8 | 0.1 | 0.7 | 0.2 |
| 9861 | 128b02 | AV642163 | HCL046f10 |   |   | 38.4   | 29.6  | 46.4  | 0.8 | 0.0 | 0.7 | 0.2 |
| 9862 | 168e04 | BP096542 | MXL060d11 |   |   | 6.3    | 6.1   | 9.3   | 1.0 | 0.1 | 0.7 | 0.3 |
| 9863 | 106h07 | AV386625 | CM004c01  |   |   | 16.6   | 8.7   | 12.7  | 0.5 | 0.2 | 0.7 | 0.1 |
| 9864 | 111c07 | AV390370 | CM045e11  |   |   | 81.7   | 53.1  | 79.6  | 0.7 | 0.1 | 0.7 | 0.1 |
| 9865 | 162d07 | BP093701 | MXL012c05 |   |   | 35.4   | 21.5  | 33.9  | 0.6 | 0.2 | 0.7 | 0.2 |
| 9866 | 163d04 | BP094247 | MXL020a12 |   |   | 13.4   | 8.1   | 12.3  | 0.6 | 0.1 | 0.7 | 0.2 |
| 9867 | 003g09 | AV397053 | CL75c10   |   |   | 22.2   | 16.0  | 25.6  | 0.7 | 0.3 | 0.7 | 0.4 |
| 9868 | 130f08 | AV643630 | HCL073a10 |   |   | 13.9   | 11.5  | 17.7  | 0.8 | 0.1 | 0.7 | 0.2 |
| 9869 | 170g09 | BP097595 | MXL078c03 |   |   | 12.4   | 10.8  | 17.9  | 0.8 | 0.4 | 0.7 | 0.5 |
| 9870 | 029b06 | AV630628 | LCL081g06 |   |   | 34.7   | 24.8  | 36.9  | 0.7 | 0.1 | 0.7 | 0.0 |
| 9871 | 169d04 | BP096936 | MXL067c12 |   |   | 20.0   | 16.0  | 30.3  | 0.8 | 0.1 | 0.7 | 0.4 |
| 9872 | 007g01 | AV392196 | CM059a12  |   |   | 34.2   | 29.0  | 52.3  | 0.9 | 0.1 | 0.7 | 0.3 |
| 9873 | 156f10 | BP086281 | MX005g01  |   |   | 50.7   | 35.1  | 59.8  | 0.7 | 0.2 | 0.7 | 0.3 |
| 9874 | 002g05 | AV395781 | CL48a01   |   |   | 2.8    | 3.2   | 4.8   | 1.2 | 0.3 | 0.7 | 0.1 |
| 9875 | 102h05 | AV394663 | CL29e05   |   |   | 27.8   | 16.6  | 27.8  | 0.7 | 0.2 | 0.7 | 0.3 |
| 9876 | 165g10 | BP095352 | MXL040d04 |   |   | 107.8  | 61.7  | 92.0  | 0.6 | 0.2 | 0.7 | 0.1 |
| 9877 | 149g07 | AV628636 | LCL044h06 |   |   | 14.3   | 11.2  | 16.1  | 0.8 | 0.1 | 0.7 | 0.1 |
| 9878 | 167h09 | BP096244 | MXL055c03 |   |   | 20.4   | 15.1  | 25.9  | 0.6 | 0.3 | 0.7 | 0.6 |
| 9879 | 008d03 | AV397410 | CM069a08  |   |   | 29.9   | 18.5  | 28.7  | 0.6 | 0.2 | 0.7 | 0.3 |
| 9880 | 152f09 | AV630067 | LCL072d09 |   |   | 22.8   | 16.6  | 24.8  | 0.7 | 0.1 | 0.7 | 0.2 |
| 9881 | 164d08 | BP094746 | MXL028f07 |   |   | 18.1   | 14.2  | 23.8  | 0.8 | 0.1 | 0.7 | 0.3 |
| 9882 | 163e06 | BP094318 | MXL021b08 |   |   | 7.2    | 7.1   | 10.7  | 1.1 | 0.5 | 0.7 | 0.1 |
| 9883 | 120d10 | AV636032 | HC054c07  |   |   | 6.5    | 6.4   | 9.5   | 1.0 | 0.2 | 0.7 | 0.1 |
| 9884 | 131d09 | AV644105 | HCL081h05 |   |   | 50.2   | 32.0  | 49.5  | 0.6 | 0.0 | 0.7 | 0.3 |
| 9885 | 020d07 | AV621010 | LC029h07  |   |   | 24.5   | 17.2  | 36.7  | 0.7 | 0.2 | 0.7 | 0.4 |
| 9886 | 124h10 | AV640350 | HCL014g02 |   |   | 17.5   | 14.6  | 22.0  | 0.8 | 0.1 | 0.7 | 0.3 |
| 9887 | 160g08 | BP089280 | MX204c11  |   |   | 7.4    | 4.2   | 9.0   | 0.7 | 0.6 | 0.7 | 0.6 |
| 9888 | 106g10 | AV386590 | CM003e07  |   |   | 10.3   | 8.3   | 12.6  | 0.8 | 0.1 | 0.7 | 0.1 |
| 9889 | 024h05 | AV626880 | LCL017c01 |   |   | 1.3    | 1.1   | 1.6   | 0.9 | 0.6 | 0.7 | 0.2 |
| 9890 | 157f10 | BP087118 | MX025h04  |   |   | 6.9    | 4.0   | 6.1   | 0.6 | 0.1 | 0.7 | 0.1 |
| 9891 | 017c10 | AV643063 | HCL063b01 |   |   | 7.9    | 6.2   | 12.7  | 0.9 | 0.5 | 0.7 | 0.5 |
| 9892 | 152e09 | AV630021 | LCL071c06 |   |   | 12.2   | 9.6   | 14.2  | 0.8 | 0.1 | 0.7 | 0.2 |
| 9893 | 146f07 | AV627174 | LCL022c01 |   |   | 16.7   | 13.3  | 20.9  | 0.8 | 0.0 | 0.7 | 0.2 |
| 9894 | 133g07 | AV645204 | HCL099e10 |   |   | 19.7   | 14.2  | 27.9  | 0.7 | 0.1 | 0.7 | 0.4 |
| 9895 | 142e11 | AV625254 | LC090a04  |   |   | 1044.0 | 457.2 | 772.3 | 0.4 | 0.2 | 0.7 | 0.5 |
| 9896 | 152e06 | AV630012 | LCL071a02 |   |   | 33.9   | 26.5  | 45.0  | 0.8 | 0.1 | 0.7 | 0.3 |
| 9897 | 109f08 | AV388306 | CM028e09  |   |   | 10.8   | 7.4   | 11.3  | 0.7 | 0.1 | 0.7 | 0.2 |
| 9898 | 166g05 | BP095747 | MXL046g09 |   |   | 11.6   | 9.0   | 16.0  | 0.7 | 0.5 | 0.7 | 0.6 |
| 9899 | 125b05 | BP383726 | HCL016d08 |   |   | 17.8   | 14.3  | 21.5  | 0.8 | 0.1 | 0.7 | 0.0 |
| 9900 | 134f11 | AV619480 | LC008h06  |   |   | 51.5   | 41.4  | 76.2  | 0.8 | 0.3 | 0.7 | 0.4 |
| 9901 | 006d07 | AV389821 | CM040b02  |   |   | 7.3    | 5.2   | 7.7   | 0.7 | 0.1 | 0.7 | 0.1 |
| 9902 | 171e04 | BP097962 | MXL084c04 |   |   | 20.3   | 17.8  | 34.5  | 0.9 | 0.1 | 0.7 | 0.4 |
| 9903 | 169h06 | BP097151 | MXL070h09 |   |   | 6.3    | 4.0   | 7.9   | 0.7 | 0.5 | 0.7 | 0.6 |
| 9904 | 125c05 | AV640514 | HCL017f08 |   |   | 11.9   | 10.1  | 16.2  | 0.8 | 0.1 | 0.7 | 0.2 |
| 9905 | 141h06 | AV624802 | LCL083a01 |   |   | 19.0   | 11.8  | 18.3  | 0.6 | 0.1 | 0.7 | 0.2 |
| 9906 | 169f10 | BP097083 | MXL069g03 |   |   | 13.3   | 7.6   | 11.7  | 0.6 | 0.3 | 0.7 | 0.4 |
| 9907 | 025g02 | AV627753 | LCL031e05 |   |   | 338.3  | 143.2 | 224.7 | 0.4 | 0.2 | 0.7 | 0.5 |
| 9908 | 170h03 | BP097626 | MXL078f10 |   |   | 22.1   | 18.0  | 29.8  | 0.8 | 0.2 | 0.7 | 0.3 |
| 9909 | 154d09 | AV630965 | LCL087a02 |   |   | 33.3   | 27.8  | 42.3  | 0.9 | 0.1 | 0.7 | 0.1 |
| 9910 | 103g10 | AV395456 | CL42c01   |   |   | 4.6    | 5.9   | 8.8   | 1.3 | 0.2 | 0.7 | 0.2 |
| 9911 | 011h08 | AV635716 | HC050a02  |   |   | 16.5   | 9.5   | 14.3  | 0.6 | 0.1 | 0.7 | 0.1 |
| 9912 | 148h09 | AV628242 | LCL039a07 |   |   | 26.9   | 18.8  | 28.1  | 0.7 | 0.1 | 0.7 | 0.1 |
| 9913 | 164e10 | BP094789 | MXL029g02 |   |   | 120.6  | 49.1  | 73.9  | 0.4 | 0.2 | 0.7 | 0.2 |
| 9914 | 166h12 | BP095845 | MXL048c04 |   |   | 7.5    | 5.9   | 11.1  | 0.7 | 0.2 | 0.7 | 0.5 |
| 9915 | 119e07 | AV635143 | HC042e01  |   |   | 39.9   | 20.3  | 30.6  | 0.5 | 0.1 | 0.7 | 0.2 |
| 9916 | 144h05 | AV626424 | LCL008g12 |   |   | 16.6   | 17.1  | 25.5  | 1.0 | 0.1 | 0.7 | 0.1 |
| 9917 | 106c02 | AV397122 | CL76d12   |   |   | 221.9  | 194.2 | 332.9 | 0.9 | 0.4 | 0.7 | 0.3 |
| 9918 | 167g01 | BP096160 | MXL053g11 |   |   | 30.5   | 19.6  | 43.5  | 0.7 | 0.2 | 0.7 | 0.4 |
| 9919 | 153d06 | AV630472 | LCL079d04 |   |   | 16.4   | 12.1  | 20.6  | 0.7 | 0.1 | 0.7 | 0.3 |
| 9920 | 170g01 | BP097563 | MXL077g09 |   |   | 21.3   | 13.7  | 23.4  | 0.6 | 0.4 | 0.7 | 0.6 |
| 9921 | 024c10 | AV626487 | LCL010a07 |   |   | 33.0   | 23.5  | 39.5  | 0.7 | 0.1 | 0.7 | 0.3 |
| 9922 | 109a12 | AV387798 | CM023f10  |   |   | 9.0    | 9.8   | 20.0  | 1.3 | 0.5 | 0.7 | 0.5 |
| 9923 | 114c02 | AV388921 | CM074c06  |   |   | 6.8    | 9.2   | 13.9  | 1.5 | 0.4 | 0.7 | 0.1 |
| 9924 | 108c11 | AV388189 | CM017h05  |   |   | 114.3  | 82.6  | 115.7 | 0.7 | 0.4 | 0.7 | 0.3 |
| 9925 | 160g07 | BP089278 | MX204c09  |   |   | 3.6    | 2.7   | 5.3   | 0.8 | 0.6 | 0.7 | 0.6 |
| 9926 | 104f08 | AV395861 | CL52c11   |   |   | 25.2   | 16.5  | 24.7  | 0.7 | 0.4 | 0.7 | 0.1 |
| 9927 | 035c05 | BP096815 | MXL065d01 |   |   | 27.1   | 21.5  | 43.0  | 0.8 | 0.2 | 0.7 | 0.4 |
| 9928 | 162g06 | BP093915 | MXL015e11 |   |   | 12.6   | 7.8   | 13.0  | 0.6 | 0.4 | 0.7 | 0.5 |
| 9929 | 155g11 | AV631616 | LCL097a09 |   |   | 23.2   | 16.2  | 25.3  | 0.7 | 0.3 | 0.7 | 0.3 |
| 9930 | 107d08 | AV397682 | CM009f07  |   |   | 13.3   | 7.1   | 10.9  | 0.5 | 0.2 | 0.7 | 0.2 |
| 9931 | 155e02 | AV631444 | LCL094a08 |   |   | 15.0   | 10.7  | 19.5  | 0.7 | 0.1 | 0.7 | 0.4 |
| 9932 | 112c12 | AV391749 | CM056a03  |   |   | 58.6   | 44.7  | 67.6  | 0.8 | 0.1 | 0.7 | 0.1 |
| 9933 | 172d11 | BP098376 | MXL092d10 |   |   | 9.7    | 7.0   | 10.5  | 0.8 | 0.2 | 0.7 | 0.0 |
| 9934 | 168h02 | BP096712 | MXL063e08 |   |   | 31.4   | 25.9  | 57.8  | 0.8 | 0.5 | 0.7 | 0.6 |
| 9935 | 148e05 | AV628055 | LCL036a09 |   |   | 29.9   | 26.8  | 43.5  | 0.9 | 0.1 | 0.7 | 0.2 |
| 9936 | 147h02 | AV627715 | LCL031a04 |   |   | 45.0   | 31.1  | 52.5  | 0.7 | 0.1 | 0.7 | 0.2 |
| 9937 | 166d03 | BP095605 | MXL044e05 |   |   | 28.2   | 20.9  | 32.7  | 0.7 | 0.1 | 0.7 | 0.2 |
| 9938 | 125b07 | AV640452 | HCL016e09 |   |   | 21.1   | 17.2  | 28.7  | 0.8 | 0.0 | 0.7 | 0.3 |
| 9939 | 024c06 | AV626464 | LCL009e07 |   |   | 102.6  | 61.0  | 102.6 | 0.6 | 0.3 | 0.7 | 0.3 |
| 9940 | 149d09 | AV628482 | LCL042e11 |   |   | 18.6   | 13.6  | 21.7  | 0.7 | 0.1 | 0.7 | 0.2 |
| 9941 | 171h08 | BP098153 | MXL088c11 |   |   | 29.6   | 22.9  | 36.3  | 0.7 | 0.2 | 0.7 | 0.4 |
| 9942 | 102d06 | AV394266 | CL22b09   |   |   | 24.8   | 17.1  | 28.4  | 0.7 | 0.1 | 0.7 | 0.3 |
| 9943 | 152g09 | AV630163 | LCL074e11 |   |   | 9.6    | 6.8   | 9.5   | 0.7 | 0.1 | 0.7 | 0.3 |
| 9944 | 125h07 | AV640844 | HCL023c10 |   |   | 28.3   | 21.6  | 34.0  | 0.8 | 0.1 | 0.7 | 0.2 |
| 9945 | 129d06 | AV642833 | HCL058h10 |   |   | 14.8   | 11.1  | 18.4  | 0.8 | 0.1 | 0.7 | 0.2 |
| 9946 | 128g02 | AV642484 | HCL052f05 |   |   | 15.2   | 13.9  | 22.5  | 0.9 | 0.2 | 0.7 | 0.2 |
| 9947 | 127h08 | AV642057 | HCL044g09 |   |   | 29.1   | 20.6  |       |     |     |     |     |

|       | A      | B        | C         | D | E | F      | G     | H      | I   | J   | K   | L   |
|-------|--------|----------|-----------|---|---|--------|-------|--------|-----|-----|-----|-----|
| 9949  | 161g07 | BP093322 | MXL006g07 |   |   | 19.0   | 15.4  | 23.8   | 0.9 | 0.4 | 0.7 | 0.2 |
| 9950  | 163d07 | BP094256 | MXL020b09 |   |   | 41.5   | 33.7  | 56.0   | 0.8 | 0.1 | 0.7 | 0.2 |
| 9951  | 129b05 | AV642695 | HCL056b09 |   |   | 23.1   | 10.8  | 16.6   | 0.5 | 0.1 | 0.7 | 0.1 |
| 9952  | 166f08 | BP095730 | MXL046e04 |   |   | 26.1   | 16.7  | 32.7   | 0.6 | 0.1 | 0.7 | 0.4 |
| 9953  | 009f08 | AV392409 | CM096f03  |   |   | 153.9  | 166.0 | 250.9  | 1.1 | 0.3 | 0.7 | 0.2 |
| 9954  | 121e03 | AV637173 | HC069g04  |   |   | 5.8    | 4.0   | 6.1    | 0.7 | 0.2 | 0.7 | 0.2 |
| 9955  | 105e03 | AV396624 | CL64b10   |   |   | 10.3   | 6.8   | 11.1   | 0.7 | 0.2 | 0.7 | 0.3 |
| 9956  | 131e11 | AV644185 | HCL083e02 |   |   | 30.3   | 20.9  | 35.1   | 0.7 | 0.2 | 0.7 | 0.4 |
| 9957  | 103c06 | AV394884 | CL34c02   |   |   | 17.1   | 12.1  | 21.7   | 0.7 | 0.1 | 0.7 | 0.3 |
| 9958  | 155g03 | AV631576 | LCL096d06 |   |   | 11.3   | 6.6   | 10.7   | 0.6 | 0.3 | 0.7 | 0.3 |
| 9959  | 102h10 | AV394670 | CL29g09   |   |   | 30.1   | 18.5  | 30.4   | 0.6 | 0.1 | 0.7 | 0.2 |
| 9960  | 001d09 | AV393901 | CL13c07   |   |   | 6.8    | 5.3   | 8.2    | 0.8 | 0.1 | 0.7 | 0.1 |
| 9961  | 171d06 | BP097914 | MXL083e02 |   |   | 8.7    | 7.3   | 11.4   | 0.8 | 0.1 | 0.7 | 0.2 |
| 9962  | 172g02 | BP098510 | MXL094d08 |   |   | 17.7   | 9.9   | 20.5   | 0.5 | 0.3 | 0.7 | 0.6 |
| 9963  | 164g04 | BP094893 | MXL031h01 |   |   | 9.7    | 6.5   | 10.2   | 0.7 | 0.2 | 0.7 | 0.3 |
| 9964  | 004e08 | AV386966 | CM010a08  |   |   | 8.0    | 6.4   | 10.9   | 0.8 | 0.1 | 0.7 | 0.3 |
| 9965  | 154e10 | AV631011 | LCL087f02 |   |   | 19.8   | 16.5  | 25.3   | 0.8 | 0.2 | 0.7 | 0.1 |
| 9966  | 006c09 | AV389673 | CM038h08  |   |   | 21.7   | 16.2  | 34.7   | 0.8 | 0.3 | 0.7 | 0.4 |
| 9967  | 006e09 | AV390080 | CM042a12  |   |   | 18.3   | 17.4  | 27.4   | 1.0 | 0.1 | 0.7 | 0.1 |
| 9968  | 110g04 | AV389787 | CM039f11  |   |   | 32.3   | 18.7  | 30.2   | 0.6 | 0.0 | 0.7 | 0.2 |
| 9969  | 012f08 | AV637185 | HC069h07  |   |   | 15.2   | 13.6  | 21.9   | 0.9 | 0.3 | 0.7 | 0.2 |
| 9970  | 007f09 | AV392148 | CM058f06  |   |   | 3.9    | 4.3   | 6.6    | 1.1 | 0.3 | 0.7 | 0.3 |
| 9971  | 024g10 | AV626860 | LCL016g11 |   |   | 11.6   | 8.4   | 13.8   | 0.7 | 0.1 | 0.7 | 0.2 |
| 9972  | 016f08 | AV642412 | HCL051d04 |   |   | 6.1    | 4.3   | 6.6    | 0.7 | 0.1 | 0.7 | 0.1 |
| 9973  | 005h07 | AV388649 | CM031b05  |   |   | 11.4   | 8.2   | 12.6   | 0.7 | 0.0 | 0.7 | 0.1 |
| 9974  | 127e07 | AV641868 | HCL041f03 |   |   | 19.4   | 13.4  | 21.5   | 0.7 | 0.1 | 0.7 | 0.2 |
| 9975  | 155f04 | AV631507 | LCL095c07 |   |   | 7.2    | 4.5   | 7.0    | 0.7 | 0.1 | 0.7 | 0.1 |
| 9976  | 145h08 | AV626895 | LCL017f04 |   |   | 21.7   | 17.0  | 27.0   | 0.8 | 0.2 | 0.7 | 0.2 |
| 9977  | 150d07 | AV628988 | LCL050a05 |   |   | 31.0   | 22.2  | 36.7   | 0.7 | 0.0 | 0.7 | 0.2 |
| 9978  | 130f05 | AV643607 | HCL072f08 |   |   | 14.7   | 13.1  | 20.1   | 0.9 | 0.1 | 0.7 | 0.1 |
| 9979  | 113b12 | AV392848 | CM064h11  |   |   | 13.5   | 10.2  | 18.8   | 0.8 | 0.2 | 0.7 | 0.4 |
| 9980  | 106f10 | AV397850 | CM002f06  |   |   | 42.8   | 39.6  | 59.8   | 0.9 | 0.3 | 0.7 | 0.1 |
| 9981  | 111b04 | AV390196 | CM043e09  |   |   | 71.5   | 49.6  | 75.9   | 0.7 | 0.1 | 0.7 | 0.1 |
| 9982  | 149f12 | AV628614 | LCL044e09 |   |   | 30.7   | 22.7  | 43.2   | 0.7 | 0.1 | 0.7 | 0.3 |
| 9983  | 009e08 | AV391949 | CM093e12  |   |   | 6.8    | 4.6   | 7.1    | 0.7 | 0.2 | 0.7 | 0.1 |
| 9984  | 140d07 | AV623827 | LC069b09  |   |   | 69.8   | 46.2  | 69.5   | 0.7 | 0.4 | 0.7 | 0.1 |
| 9985  | 127e02 | AV641817 | HCL040g11 |   |   | 15.3   | 12.3  | 19.9   | 0.8 | 0.1 | 0.7 | 0.1 |
| 9986  | 107g04 | AV387114 | CM012c12  |   |   | 103.2  | 53.9  | 93.6   | 0.5 | 0.1 | 0.6 | 0.3 |
| 9987  | 124d02 | AV640111 | HCL010f02 |   |   | 13.7   | 10.0  | 16.8   | 0.7 | 0.1 | 0.6 | 0.2 |
| 9988  | 167g02 | BP096172 | MXL054a06 |   |   | 13.2   | 7.9   | 16.7   | 0.6 | 0.3 | 0.6 | 0.5 |
| 9989  | 101g06 | AV393957 | CL15c07   |   |   | 14.2   | 10.8  | 19.2   | 0.8 | 0.3 | 0.6 | 0.3 |
| 9990  | 149c10 | AV628455 | LCL042b07 |   |   | 1395.5 | 544.2 | 1017.3 | 0.4 | 0.2 | 0.6 | 0.5 |
| 9991  | 154g11 | AV631161 | LCL089f10 |   |   | 66.7   | 51.0  | 91.4   | 0.8 | 0.1 | 0.6 | 0.2 |
| 9992  | 018d08 | AV644514 | HCL089g11 |   |   | 5.3    | 4.6   | 8.0    | 1.0 | 0.5 | 0.6 | 0.3 |
| 9993  | 116c04 | BP383686 | CM097h03  |   |   | 20.6   | 10.2  | 15.8   | 0.5 | 0.1 | 0.6 | 0.1 |
| 9994  | 125c07 | AV640527 | HCL017h02 |   |   | 14.0   | 11.5  | 18.5   | 0.8 | 0.1 | 0.6 | 0.1 |
| 9995  | 156g01 | BP086300 | MX006b06  |   |   | 5.7    | 4.4   | 7.5    | 0.8 | 0.3 | 0.6 | 0.3 |
| 9996  | 102e06 | AV394499 | CL23d01   |   |   | 16.4   | 22.4  | 36.8   | 1.4 | 0.6 | 0.6 | 0.3 |
| 9997  | 147b09 | AV627414 | LCL026d04 |   |   | 28.1   | 22.4  | 35.8   | 0.8 | 0.2 | 0.6 | 0.1 |
| 9998  | 145g01 | AV626822 | LCL016a06 |   |   | 11.5   | 9.6   | 14.8   | 0.8 | 0.1 | 0.6 | 0.1 |
| 9999  | 018f09 | AV619036 | LC002h07  |   |   | 17.3   | 13.7  | 21.2   | 0.8 | 0.3 | 0.6 | 0.1 |
| 10000 | 157h11 | BP087317 | MX031g06  |   |   | 3.8    | 3.9   | 5.9    | 1.0 | 0.1 | 0.6 | 0.2 |
| 10001 | 110c03 | AV389070 | CM034e01  |   |   | 156.6  | 74.7  | 115.6  | 0.5 | 0.2 | 0.6 | 0.3 |
| 10002 | 016f07 | AV642402 | HCL051b11 |   |   | 7.7    | 5.4   | 8.8    | 0.7 | 0.2 | 0.6 | 0.2 |
| 10003 | 018d06 | AV644511 | HCL089g08 |   |   | 5.5    | 5.9   | 10.4   | 1.1 | 0.3 | 0.6 | 0.3 |
| 10004 | 165f06 | BP095288 | MXL039d07 |   |   | 13.5   | 10.1  | 17.5   | 0.8 | 0.2 | 0.6 | 0.3 |
| 10005 | 127g07 | AV642000 | HCL043f10 |   |   | 27.1   | 19.9  | 39.6   | 0.7 | 0.1 | 0.6 | 0.4 |
| 10006 | 171f06 | BP098019 | MXL085d10 |   |   | 14.9   | 11.6  | 20.1   | 0.8 | 0.5 | 0.6 | 0.5 |
| 10007 | 035a05 | BP096521 | MXL060b02 |   |   | 58.0   | 35.6  | 57.6   | 0.6 | 0.0 | 0.6 | 0.3 |
| 10008 | 171f08 | BP098034 | MXL085f06 |   |   | 6.1    | 4.3   | 7.6    | 0.7 | 0.5 | 0.6 | 0.5 |
| 10009 | 167e08 | BP096106 | MXL052g07 |   |   | 18.5   | 14.9  | 24.9   | 0.8 | 0.1 | 0.6 | 0.2 |
| 10010 | 012d02 | AV636622 | HC061h10  |   |   | 196.6  | 125.7 | 200.7  | 0.7 | 0.4 | 0.6 | 0.3 |
| 10011 | 144b03 | AV626144 | LCL003a12 |   |   | 28.3   | 16.3  | 25.8   | 0.6 | 0.0 | 0.6 | 0.1 |
| 10012 | 104d08 | AV397740 | CL49f08   |   |   | 4.0    | 3.6   | 6.5    | 0.9 | 0.1 | 0.6 | 0.3 |
| 10013 | 101a02 | AV393307 | CL01c04   |   |   | 5.7    | 7.5   | 14.8   | 1.6 | 0.6 | 0.6 | 0.5 |
| 10014 | 104e04 | AV395592 | CL44g06   |   |   | 15.2   | 13.1  | 21.2   | 0.9 | 0.1 | 0.6 | 0.2 |
| 10015 | 030f10 | BP086097 | MX001h02  |   |   | 73.7   | 45.0  | 68.5   | 0.6 | 0.2 | 0.6 | 0.1 |
| 10016 | 021h05 | AV623018 | LC057h03  |   |   | 8.5    | 10.0  | 15.7   | 1.2 | 0.2 | 0.6 | 0.1 |
| 10017 | 129f10 | AV642990 | HCL061g09 |   |   | 20.9   | 13.7  | 22.0   | 0.7 | 0.1 | 0.6 | 0.2 |
| 10018 | 114d11 | AV387985 | CM077a02  |   |   | 18.1   | 11.3  | 17.8   | 0.6 | 0.0 | 0.6 | 0.2 |
| 10019 | 003c09 | AV397925 | CL59b09   |   |   | 17.1   | 12.6  | 22.1   | 0.8 | 0.3 | 0.6 | 0.3 |
| 10020 | 118e05 | AV633893 | HC026e11  |   |   | 158.9  | 94.2  | 146.4  | 0.6 | 0.0 | 0.6 | 0.1 |
| 10021 | 163g02 | BP094452 | MXL023c03 |   |   | 11.7   | 7.3   | 14.2   | 0.7 | 0.3 | 0.6 | 0.4 |
| 10022 | 105c06 | AV396385 | CL60g09   |   |   | 22.3   | 20.0  | 33.0   | 0.9 | 0.1 | 0.6 | 0.1 |
| 10023 | 170e11 | BP097473 | MXL076c09 |   |   | 16.8   | 10.9  | 16.9   | 0.6 | 0.1 | 0.6 | 0.2 |
| 10024 | 166e06 | BP095684 | MXL045g07 |   |   | 57.0   | 47.0  | 75.3   | 0.8 | 0.2 | 0.6 | 0.1 |
| 10025 | 120f07 | BP383705 | HC057c07  |   |   | 62.1   | 45.4  | 74.5   | 0.7 | 0.1 | 0.6 | 0.2 |
| 10026 | 005h06 | AV388628 | CM030g08  |   |   | 92.4   | 49.2  | 81.0   | 0.5 | 0.1 | 0.6 | 0.2 |
| 10027 | 144h02 | BP098828 | MXL099g08 |   |   | 17.5   | 15.3  | 25.7   | 0.9 | 0.1 | 0.6 | 0.2 |
| 10028 | 153g11 | AV630668 | LCL082d09 |   |   | 65.2   | 61.9  | 112.2  | 1.0 | 0.1 | 0.6 | 0.3 |
| 10029 | 163h10 | BP094566 | MXL025a08 |   |   | 4.0    | 4.2   | 7.1    | 1.0 | 0.1 | 0.6 | 0.5 |
| 10030 | 155h08 | AV631649 | LCL097e11 |   |   | 13.1   | 9.4   | 17.4   | 0.7 | 0.3 | 0.6 | 0.5 |
| 10031 | 113c08 | AV392909 | CM065c05  |   |   | 9.7    | 7.1   | 11.1   | 0.7 | 0.1 | 0.6 | 0.0 |
| 10032 | 011g10 | AV635506 | HC047c01  |   |   | 11.9   | 11.7  | 18.5   | 1.0 | 0.1 | 0.6 | 0.1 |
| 10033 | 105g01 | AV396912 | CL68a05   |   |   | 9.6    | 13.4  | 21.5   | 1.4 | 0.2 | 0.6 | 0.1 |
| 10034 | 106d02 | AV397213 | CL78g12   |   |   | 14.2   | 9.0   | 14.3   | 0.6 | 0.1 | 0.6 | 0.1 |
| 10035 | 012g03 | AV637296 | HC071c07  |   |   | 196.0  | 144.7 | 219.3  | 0.8 | 0.4 | 0.6 | 0.1 |
| 10036 | 150h10 | AV629273 | LCL055g03 |   |   | 28.3   | 16.5  | 26.8   | 0.6 | 0.1 | 0.6 | 0.1 |
| 10037 | 164e12 | BP094810 | MXL030b06 |   |   | 21.0   | 13.9  | 26.6   | 0.7 | 0.1 | 0.6 | 0.4 |
| 10038 | 149g09 | AV628657 | LCL045c02 |   |   | 21.6   | 15.2  | 25.6   | 0.7 | 0.1 | 0.6 | 0.2 |
| 10039 | 010f09 | AV633352 | HC019g11  |   |   | 18.3   | 18.4  | 29.1   | 1.1 | 0.5 | 0.6 | 0.2 |
| 10040 | 127f11 | AV641955 | HCL043a06 |   |   | 18.4   | 14.4  | 27.0   | 0.8 | 0.0 | 0.6 | 0.3 |
| 10041 | 121g05 | AV637476 | HC073f03  |   |   | 10.3   | 8.3   | 12.9   | 0.8 | 0.1 | 0.6 | 0.1 |
| 10042 | 150f10 | AV629121 | LCL052e09 |   |   | 13.7   | 9.9   | 15.9   | 0.7 | 0.1 | 0.6 | 0.2 |
| 10043 | 143h10 | BP098805 | MXL099d06 |   |   | 55.0   | 26.6  | 42.6   | 0.5 | 0.1 | 0.6 | 0.2 |
| 10044 | 158d07 | BP087647 | MX040c01  |   |   | 10.8   | 7.2   | 11.6   | 0.7 | 0.2 | 0.6 | 0.1 |
| 10045 | 003d09 | AV396524 | CL63c07   |   |   | 16.3   | 11.3  | 22.6   | 0.8 | 0.2 | 0.6 | 0.3 |
| 10046 | 016e10 | AV642315 | HCL049f03 |   |   | 31.8   | 18.0  | 29.0   | 0.6 | 0.1 | 0.6 | 0.2 |
| 10047 | 161h02 | BP093364 | MXL007d09 |   |   | 25.9   | 13.7  | 29.0   | 0.5 | 0.4 | 0.6 | 0.6 |
| 10048 | 013h12 | AV639655 | HCL002e05 |   |   | 2.3    | 1.7   | 2.6    | 0.7 | 0.3 | 0.6 | 0.4 |
| 10049 | 164h11 | BP094989 | MXL034a02 |   |   | 24.0   | 18.2  | 50.7   | 0.7 | 0.4 | 0.6 | 0.6 |
| 10050 | 110h07 | AV389926 | CM040g08  |   |   | 63.2   | 29.0  | 48.9   | 0.5 | 0.1 | 0.6 | 0.2 |
| 10051 | 155h04 | AV631639 | LCL097d08 |   |   | 22.3   | 14.0  | 30.4   | 0.6 | 0.3 | 0.6 | 0.6 |
| 10052 | 171g12 | BP098106 | MXL087b09 |   |   | 48.9   | 22.4  | 35.0   | 0.5 | 0.2 | 0.6 | 0.1 |
| 10053 | 013f10 | AV639199 | HC096c04  |   |   | 5.6    | 4.1   | 8.7    | 0.8 | 0.4 | 0.6 | 0.5 |
| 10054 | 016g08 |          |           |   |   |        |       |        |     |     |     |     |

|       | A      | B        | C         | D | E | F     | G     | H     | I   | J   | K   | L   |
|-------|--------|----------|-----------|---|---|-------|-------|-------|-----|-----|-----|-----|
| 10056 | 124c09 | AV640093 | HCL010c04 |   |   | 31.3  | 25.2  | 40.1  | 0.8 | 0.0 | 0.6 | 0.1 |
| 10057 | 123g09 | AV639797 | HCL005b09 |   |   | 26.8  | 17.7  | 30.4  | 0.7 | 0.1 | 0.6 | 0.3 |
| 10058 | 136a08 | AV620440 | LC02b12   |   |   | 40.5  | 27.8  | 43.9  | 0.7 | 0.0 | 0.6 | 0.0 |
| 10059 | 169g09 | BP097118 | MXL070d08 |   |   | 17.5  | 9.7   | 20.5  | 0.5 | 0.4 | 0.6 | 0.6 |
| 10060 | 110d02 | AV389193 | CM035e07  |   |   | 113.3 | 72.0  | 119.9 | 0.6 | 0.2 | 0.6 | 0.3 |
| 10061 | 035c07 | BP096851 | MXL065h07 |   |   | 15.7  | 10.1  | 18.0  | 0.6 | 0.1 | 0.6 | 0.3 |
| 10062 | 026d06 | AV628309 | LCL039h05 |   |   | 366.4 | 141.7 | 261.0 | 0.4 | 0.1 | 0.6 | 0.4 |
| 10063 | 131d01 | AV644054 | HCL080h08 |   |   | 23.5  | 19.8  | 32.7  | 0.9 | 0.1 | 0.6 | 0.2 |
| 10064 | 167g12 | BP096211 | MXL047c12 |   |   | 9.6   | 10.3  | 15.4  | 0.9 | 0.4 | 0.6 | 0.5 |
| 10065 | 101b06 | AV397611 | CL02c08   |   |   | 8.1   | 6.6   | 10.9  | 0.8 | 0.1 | 0.6 | 0.1 |
| 10066 | 131d12 | AV644123 | HCL082d06 |   |   | 28.5  | 22.0  | 35.4  | 0.8 | 0.1 | 0.6 | 0.1 |
| 10067 | 014e05 | AV640094 | HCL010c05 |   |   | 22.7  | 8.1   | 12.8  | 0.4 | 0.1 | 0.6 | 0.1 |
| 10068 | 115c12 | AV390117 | CM086f01  |   |   | 155.5 | 71.6  | 115.0 | 0.5 | 0.2 | 0.6 | 0.3 |
| 10069 | 166h02 | BP095783 | MXL047c12 |   |   | 10.8  | 7.4   | 22.4  | 0.7 | 0.4 | 0.6 | 0.6 |
| 10070 | 106a05 | AV397001 | CL73f06   |   |   | 13.7  | 15.6  | 31.4  | 1.5 | 0.7 | 0.6 | 0.4 |
| 10071 | 025d10 | AV627367 | LCL025f12 |   |   | 18.5  | 13.5  | 26.5  | 0.7 | 0.1 | 0.6 | 0.3 |
| 10072 | 127c07 | BP098733 | MXL098b11 |   |   | 23.2  | 18.3  | 29.2  | 0.8 | 0.1 | 0.6 | 0.0 |
| 10073 | 012c10 | AV636519 | HC060e10  |   |   | 8.1   | 7.9   | 17.4  | 1.0 | 0.3 | 0.6 | 0.4 |
| 10074 | 001e08 | AV393989 | CL15e09   |   |   | 1.9   | 2.5   | 4.0   | 1.3 | 0.4 | 0.6 | 0.2 |
| 10075 | 171g10 | BP098093 | MXL086h07 |   |   | 9.5   | 7.1   | 11.2  | 0.7 | 0.2 | 0.6 | 0.4 |
| 10076 | 148h10 | AV628246 | LCL039a12 |   |   | 39.0  | 25.4  | 45.2  | 0.7 | 0.1 | 0.6 | 0.2 |
| 10077 | 162f06 | BP093853 | MXL014g04 |   |   | 25.5  | 14.5  | 22.6  | 0.6 | 0.1 | 0.6 | 0.2 |
| 10078 | 020d06 | AV621008 | LC029h05  |   |   | 29.4  | 23.5  | 37.5  | 0.9 | 0.4 | 0.6 | 0.1 |
| 10079 | 156h04 | BP086394 | MX007h07  |   |   | 12.0  | 6.5   | 13.2  | 0.6 | 0.3 | 0.6 | 0.4 |
| 10080 | 161f03 | BP093226 | MXL005c07 |   |   | 30.1  | 18.9  | 37.1  | 0.6 | 0.2 | 0.6 | 0.4 |
| 10081 | 164d05 | BP094740 | MXL029e09 |   |   | 28.1  | 24.6  | 39.6  | 0.9 | 0.1 | 0.6 | 0.1 |
| 10082 | 030f08 | AV631855 | LCL100h04 |   |   | 18.0  | 12.4  | 20.3  | 0.7 | 0.1 | 0.6 | 0.2 |
| 10083 | 132e08 | AV644718 | HCL092g08 |   |   | 33.2  | 21.4  | 39.8  | 0.6 | 0.1 | 0.6 | 0.3 |
| 10084 | 128h09 | AV642605 | HCL054f02 |   |   | 11.5  | 8.6   | 15.7  | 0.8 | 0.1 | 0.6 | 0.3 |
| 10085 | 034b11 | BP095417 | MXL041e01 |   |   | 9.0   | 5.2   | 8.5   | 0.6 | 0.1 | 0.6 | 0.1 |
| 10086 | 119e11 | AV635165 | HC042g03  |   |   | 8.3   | 4.8   | 7.9   | 0.6 | 0.1 | 0.6 | 0.2 |
| 10087 | 118d07 | AV633745 | HC024g03  |   |   | 150.9 | 74.3  | 117.5 | 0.5 | 0.1 | 0.6 | 0.1 |
| 10088 | 121c03 | AV636948 | HC066e08  |   |   | 604.5 | 290.0 | 510.5 | 0.5 | 0.2 | 0.6 | 0.4 |
| 10089 | 120d03 | AV635992 | HC053g06  |   |   | 27.3  | 10.2  | 18.5  | 0.4 | 0.1 | 0.6 | 0.4 |
| 10090 | 128c01 | AV642239 | HCL048b04 |   |   | 28.3  | 20.0  | 35.0  | 0.7 | 0.1 | 0.6 | 0.2 |
| 10091 | 157f05 | BP087093 | MX025a03  |   |   | 19.8  | 17.9  | 28.8  | 0.9 | 0.1 | 0.6 | 0.0 |
| 10092 | 019g10 | AV620292 | LC020b08  |   |   | 4.0   | 4.6   | 9.5   | 1.2 | 0.3 | 0.6 | 0.5 |
| 10093 | 167g05 | BP096182 | MXL054b07 |   |   | 81.3  | 44.8  | 80.5  | 0.6 | 0.2 | 0.6 | 0.3 |
| 10094 | 127d08 | AV641798 | HCL040d10 |   |   | 41.2  | 25.5  | 42.9  | 0.6 | 0.0 | 0.6 | 0.1 |
| 10095 | 032e08 | BP093393 | MXL007g09 |   |   | 32.3  | 22.6  | 44.0  | 0.7 | 0.1 | 0.6 | 0.3 |
| 10096 | 166d04 | BP095606 | MXL044e06 |   |   | 9.1   | 6.4   | 10.5  | 0.7 | 0.1 | 0.6 | 0.2 |
| 10097 | 146h08 | AV627292 | LCL024e05 |   |   | 62.3  | 42.2  | 79.3  | 0.7 | 0.0 | 0.6 | 0.3 |
| 10098 | 152g07 | AV630108 | LCL073c05 |   |   | 17.6  | 12.7  | 22.0  | 0.7 | 0.1 | 0.6 | 0.3 |
| 10099 | 118a02 | AV633301 | HC019b08  |   |   | 7.0   | 7.0   | 12.6  | 1.1 | 0.6 | 0.6 | 0.2 |
| 10100 | 160h08 | BP089404 | MX206f06  |   |   | 11.8  | 7.9   | 17.8  | 0.8 | 0.6 | 0.6 | 0.5 |
| 10101 | 169d08 | BP096970 | MXL067h12 |   |   | 48.3  | 41.5  | 80.4  | 0.9 | 0.1 | 0.6 | 0.3 |
| 10102 | 166h11 | BP095839 | MXL048b08 |   |   | 7.6   | 5.3   | 10.3  | 0.6 | 0.3 | 0.6 | 0.5 |
| 10103 | 171g07 | BP098073 | MXL086e03 |   |   | 11.2  | 7.5   | 16.0  | 0.8 | 0.5 | 0.6 | 0.5 |
| 10104 | 103d09 | AV395106 | CL38d03   |   |   | 9.9   | 7.6   | 14.4  | 0.8 | 0.1 | 0.6 | 0.3 |
| 10105 | 112b05 | AV391494 | CM054h07  |   |   | 40.9  | 22.2  | 35.8  | 0.6 | 0.1 | 0.6 | 0.1 |
| 10106 | 147h09 | AV627764 | LCL031f10 |   |   | 26.6  | 20.8  | 36.1  | 0.8 | 0.2 | 0.6 | 0.3 |
| 10107 | 110g05 | AV398909 | CM039h04  |   |   | 20.7  | 9.2   | 15.0  | 0.4 | 0.0 | 0.6 | 0.1 |
| 10108 | 166e03 | BP095659 | MXL045d03 |   |   | 10.2  | 6.7   | 10.9  | 0.7 | 0.3 | 0.6 | 0.1 |
| 10109 | 157g09 | BP087163 | MX027a08  |   |   | 8.4   | 5.8   | 9.5   | 0.8 | 0.5 | 0.6 | 0.4 |
| 10110 | 168g10 | BP096702 | MXL063d03 |   |   | 13.9  | 12.2  | 22.1  | 0.8 | 0.3 | 0.6 | 0.5 |
| 10111 | 170h01 | BP097611 | MXL078e03 |   |   | 2.3   | 1.9   | 3.7   | 0.7 | 0.6 | 0.6 | 0.6 |
| 10112 | 166e11 | BP095708 | MXL046b07 |   |   | 18.5  | 7.7   | 12.5  | 0.4 | 0.1 | 0.6 | 0.0 |
| 10113 | 035e11 | BP097160 | MXL071a10 |   |   | 28.3  | 24.7  | 41.3  | 1.1 | 0.5 | 0.6 | 0.2 |
| 10114 | 131b05 | AV643889 | HCL077h03 |   |   | 17.7  | 13.4  | 23.7  | 0.8 | 0.0 | 0.6 | 0.2 |
| 10115 | 169f05 | BP097058 | MXL069d01 |   |   | 25.2  | 14.2  | 25.6  | 0.6 | 0.2 | 0.6 | 0.3 |
| 10116 | 035b09 | BP096726 | MXL063g08 |   |   | 10.8  | 6.6   | 10.6  | 0.6 | 0.2 | 0.6 | 0.2 |
| 10117 | 127g10 | AV642004 | HCL043g03 |   |   | 59.2  | 42.1  | 79.3  | 0.7 | 0.2 | 0.6 | 0.4 |
| 10118 | 158h09 | BP087713 | MX042a10  |   |   | 6.8   | 4.6   | 8.5   | 0.6 | 0.3 | 0.6 | 0.5 |
| 10119 | 033d04 | BP094353 | MXL021g09 |   |   | 21.6  | 17.6  | 31.9  | 0.8 | 0.1 | 0.6 | 0.2 |
| 10120 | 003f11 | AV396907 | CL71g05   |   |   | 26.8  | 17.0  | 27.8  | 0.6 | 0.1 | 0.6 | 0.1 |
| 10121 | 154g06 | AV631126 | LCL089c04 |   |   | 5.5   | 4.9   | 7.9   | 0.9 | 0.2 | 0.6 | 0.1 |
| 10122 | 128e03 | BP098736 | MXL098c02 |   |   | 17.4  | 13.0  | 22.4  | 0.7 | 0.2 | 0.6 | 0.3 |
| 10123 | 125g07 | AV640793 | HCL022e08 |   |   | 14.9  | 12.0  | 21.3  | 0.8 | 0.0 | 0.6 | 0.2 |
| 10124 | 163f10 | BP094442 | MXL023b02 |   |   | 23.0  | 14.3  | 28.4  | 0.6 | 0.1 | 0.6 | 0.3 |
| 10125 | 036e04 | BP098305 | MXL091c01 |   |   | 25.9  | 42.0  | 70.8  | 1.6 | 0.3 | 0.6 | 0.1 |
| 10126 | 144g07 | AV626372 | LCL008a04 |   |   | 34.9  | 27.1  | 47.1  | 0.8 | 0.0 | 0.6 | 0.2 |
| 10127 | 145h07 | AV626894 | LCL017f02 |   |   | 18.5  | 14.8  | 24.5  | 0.8 | 0.3 | 0.6 | 0.1 |
| 10128 | 156h10 | BP086429 | MX008f09  |   |   | 4.8   | 3.9   | 7.5   | 0.7 | 0.2 | 0.6 | 0.5 |
| 10129 | 160g12 | BP089321 | MX205a09  |   |   | 5.3   | 5.0   | 9.5   | 1.0 | 0.2 | 0.6 | 0.4 |
| 10130 | 159h04 | BP088169 | MX053b11  |   |   | 32.4  | 14.8  | 26.1  | 0.5 | 0.1 | 0.6 | 0.1 |
| 10131 | 165h07 | BP095389 | MXL041b01 |   |   | 23.1  | 12.6  | 46.6  | 0.6 | 0.4 | 0.6 | 0.6 |
| 10132 | 132e06 | AV644709 | HCL092f11 |   |   | 11.8  | 9.1   | 16.0  | 0.8 | 0.1 | 0.6 | 0.3 |
| 10133 | 124f06 | AV640211 | HCL012c01 |   |   | 25.3  | 19.2  | 34.0  | 0.8 | 0.0 | 0.6 | 0.2 |
| 10134 | 013c07 | AV638420 | HC086b08  |   |   | 10.3  | 13.1  | 22.5  | 1.4 | 0.6 | 0.6 | 0.2 |
| 10135 | 130d05 | AV643433 | HCL069e12 |   |   | 27.5  | 24.5  | 43.3  | 0.9 | 0.2 | 0.6 | 0.2 |
| 10136 | 162f03 | BP093835 | MXL014e02 |   |   | 15.7  | 10.1  | 23.0  | 0.6 | 0.1 | 0.6 | 0.5 |
| 10137 | 125h09 | AV640856 | HCL023f01 |   |   | 17.8  | 12.2  | 24.8  | 0.7 | 0.1 | 0.6 | 0.4 |
| 10138 | 143d09 | BP383830 | LC096f07  |   |   | 42.8  | 32.0  | 52.7  | 0.8 | 0.1 | 0.6 | 0.1 |
| 10139 | 002e10 | AV395482 | CL42f11   |   |   | 3.6   | 2.8   | 4.8   | 0.8 | 0.1 | 0.6 | 0.2 |
| 10140 | 165g07 | BP095347 | MXL040c10 |   |   | 5.1   | 3.4   | 6.4   | 0.7 | 0.4 | 0.6 | 0.4 |
| 10141 | 126f07 | AV641379 | HCL032e12 |   |   | 10.7  | 8.4   | 14.3  | 0.8 | 0.0 | 0.6 | 0.1 |
| 10142 | 166d11 | BP095649 | MXL045c01 |   |   | 25.4  | 18.9  | 31.0  | 0.7 | 0.1 | 0.6 | 0.1 |
| 10143 | 160f10 | BP089179 | MX202c10  |   |   | 5.4   | 3.9   | 6.7   | 0.7 | 0.1 | 0.6 | 0.2 |
| 10144 | 035d06 | BP096985 | MXL068c01 |   |   | 32.3  | 27.3  | 47.0  | 0.8 | 0.0 | 0.6 | 0.2 |
| 10145 | 126e07 | AV641315 | HCL031e04 |   |   | 32.2  | 23.2  | 43.1  | 0.7 | 0.1 | 0.6 | 0.2 |
| 10146 | 147f04 | AV627612 | LCL029e03 |   |   | 41.3  | 36.6  | 66.8  | 0.9 | 0.2 | 0.6 | 0.2 |
| 10147 | 014h12 | AV640575 | HCL018e09 |   |   | 23.5  | 8.6   | 14.7  | 0.4 | 0.1 | 0.6 | 0.1 |
| 10148 | 105b04 | AV396207 | CL58b07   |   |   | 7.9   | 6.3   | 10.4  | 0.8 | 0.1 | 0.6 | 0.2 |
| 10149 | 016f05 | AV642369 | HCL050f08 |   |   | 12.1  | 9.1   | 15.1  | 0.8 | 0.4 | 0.6 | 0.3 |
| 10150 | 002d05 | AV395318 | CL38h06   |   |   | 6.6   | 6.9   | 13.2  | 1.1 | 0.3 | 0.6 | 0.3 |
| 10151 | 132a03 | AV644393 | HCL087g05 |   |   | 19.6  | 12.8  | 22.2  | 0.6 | 0.2 | 0.6 | 0.3 |
| 10152 | 117a07 | AV632125 | HC004c05  |   |   | 22.8  | 17.0  | 29.4  | 0.7 | 0.0 | 0.6 | 0.3 |
| 10153 | 106b07 | AV397097 | CL75f01   |   |   | 11.9  | 9.5   | 18.1  | 0.8 | 0.1 | 0.6 | 0.3 |
| 10154 | 018h01 | AV619138 | LC004c11  |   |   | 5.5   | 5.8   | 9.7   | 1.1 | 0.2 | 0.6 | 0.2 |
| 10155 | 017a08 | AV642841 | HCL059b03 |   |   | 13.4  | 10.4  | 17.6  | 0.8 | 0.1 | 0.6 | 0.1 |
| 10156 | 111g07 | AV391129 | CM051b04  |   |   | 4.8   | 8.2   | 13.2  | 1.7 | 0.6 | 0.6 | 0.1 |
| 10157 | 120b03 | AV635760 | HC050e10  |   |   | 8.9   | 6.2   | 10.8  | 0.7 | 0.0 | 0.6 | 0.1 |
| 10158 | 023c05 | AV624875 | LC083h11  |   |   | 68.2  | 56.8  | 97.1  | 0.9 | 0.1 | 0.6 | 0.1 |
| 10159 | 133f08 | AV645149 | HCL098g12 |   |   | 12.7  | 9.2   | 17.9  | 0.7 | 0.2 | 0.6 | 0.4 |
| 10160 | 171g02 | BP098054 | MXL086b05 |   |   | 32.3  | 22.2  | 50.5  | 0.7 | 0.3 |     |     |

|       | A      | B        | C         | D | E | F      | G     | H     | I   | J   | K   | L   |
|-------|--------|----------|-----------|---|---|--------|-------|-------|-----|-----|-----|-----|
| 10163 | 124g08 | AV640276 | HCL013e09 |   |   | 13.8   | 10.1  | 16.4  | 0.7 | 0.1 | 0.6 | 0.1 |
| 10164 | 118g11 | AV634274 | HC031c11  |   |   | 10.5   | 6.9   | 11.5  | 0.7 | 0.2 | 0.6 | 0.1 |
| 10165 | 145e02 | AV626715 | LCL014b09 |   |   | 86.2   | 27.4  | 45.2  | 0.4 | 0.2 | 0.6 | 0.1 |
| 10166 | 148f11 | AV628143 | LCL037d04 |   |   | 32.3   | 26.9  | 48.4  | 0.8 | 0.1 | 0.6 | 0.2 |
| 10167 | 143d10 | AV625706 | LC096g02  |   |   | 31.6   | 27.5  | 51.9  | 0.9 | 0.1 | 0.6 | 0.2 |
| 10168 | 161g08 | BP093329 | MXL006h08 |   |   | 23.1   | 18.0  | 34.0  | 0.8 | 0.4 | 0.6 | 0.4 |
| 10169 | 028a05 | AV629564 | LCL061a12 |   |   | 30.3   | 14.9  | 25.1  | 0.5 | 0.0 | 0.6 | 0.2 |
| 10170 | 162h04 | BP093975 | MXL016e02 |   |   | 88.7   | 45.8  | 118.4 | 0.5 | 0.3 | 0.6 | 0.5 |
| 10171 | 141f05 | AV624632 | LC080d12  |   |   | 24.7   | 18.2  | 31.7  | 0.7 | 0.1 | 0.6 | 0.2 |
| 10172 | 164e02 | BP094761 | MXL029a01 |   |   | 36.4   | 34.9  | 60.4  | 1.2 | 0.7 | 0.6 | 0.2 |
| 10173 | 120e11 | AV636156 | HC055h06  |   |   | 12.9   | 9.6   | 16.2  | 0.7 | 0.1 | 0.6 | 0.1 |
| 10174 | 129f07 | AV642985 | HCL061f08 |   |   | 14.0   | 10.7  | 19.6  | 0.8 | 0.2 | 0.6 | 0.3 |
| 10175 | 104f06 | AV395867 | CL52a05   |   |   | 16.8   | 12.2  | 20.3  | 0.7 | 0.1 | 0.6 | 0.2 |
| 10176 | 160f08 | BP089115 | MX201a04  |   |   | 8.0    | 4.2   | 7.5   | 0.5 | 0.1 | 0.6 | 0.2 |
| 10177 | 125g05 | AV640784 | HCL022d03 |   |   | 25.5   | 19.6  | 32.7  | 0.8 | 0.1 | 0.6 | 0.1 |
| 10178 | 155h10 | AV631654 | LCL097f08 |   |   | 20.2   | 13.4  | 30.7  | 0.6 | 0.2 | 0.6 | 0.5 |
| 10179 | 007g12 | AV392391 | CM061d01  |   |   | 8.8    | 6.7   | 11.8  | 0.8 | 0.5 | 0.6 | 0.3 |
| 10180 | 127f07 | AV641934 | HCL042f06 |   |   | 28.3   | 19.5  | 38.2  | 0.7 | 0.1 | 0.6 | 0.3 |
| 10181 | 110f08 | AV389663 | CM038h05  |   |   | 29.7   | 19.0  | 30.8  | 0.7 | 0.4 | 0.6 | 0.2 |
| 10182 | 122g08 | AV638861 | HC091g07  |   |   | 35.9   | 13.4  | 23.5  | 0.4 | 0.1 | 0.6 | 0.2 |
| 10183 | 005f12 | AV388012 | CM028b12  |   |   | 13.7   | 14.4  | 24.0  | 0.9 | 0.4 | 0.6 | 0.5 |
| 10184 | 158e05 | BP087657 | MX040e01  |   |   | 28.7   | 18.6  | 33.7  | 1.4 | 1.4 | 0.6 | 0.3 |
| 10185 | 170d05 | BP097406 | MXL075b10 |   |   | 27.6   | 15.5  | 28.3  | 0.6 | 0.1 | 0.6 | 0.1 |
| 10186 | 149g08 | AV628643 | LCL045a06 |   |   | 16.1   | 11.1  | 19.3  | 0.7 | 0.2 | 0.6 | 0.2 |
| 10187 | 112b02 | AV391454 | CM054f04  |   |   | 21.1   | 29.5  | 56.0  | 1.5 | 0.4 | 0.6 | 0.2 |
| 10188 | 008e08 | AV388499 | CM071e02  |   |   | 8.6    | 6.2   | 10.8  | 0.7 | 0.1 | 0.6 | 0.1 |
| 10189 | 029h12 | AV631232 | LCL090f03 |   |   | 9.9    | 7.0   | 12.9  | 0.7 | 0.2 | 0.6 | 0.2 |
| 10190 | 001f08 | AV394091 | CL18g07   |   |   | 1.5    | 1.2   | 2.1   | 0.8 | 0.3 | 0.6 | 0.1 |
| 10191 | 162g08 | BP093926 | MXL015g03 |   |   | 24.8   | 15.9  | 27.6  | 0.6 | 0.3 | 0.6 | 0.4 |
| 10192 | 152g04 | AV630102 | LCL073b05 |   |   | 37.9   | 26.7  | 48.0  | 0.7 | 0.1 | 0.6 | 0.1 |
| 10193 | 130d10 | AV643464 | HCL070b05 |   |   | 10.1   | 8.2   | 14.0  | 0.8 | 0.2 | 0.6 | 0.1 |
| 10194 | 171f10 | BP098036 | MXL085f12 |   |   | 20.0   | 9.2   | 16.1  | 0.5 | 0.2 | 0.6 | 0.3 |
| 10195 | 128d07 | AV642357 | HCL050d03 |   |   | 35.6   | 26.6  | 48.3  | 0.7 | 0.0 | 0.6 | 0.2 |
| 10196 | 104b03 | AV397780 | CL45a01   |   |   | 12.7   | 15.3  | 29.4  | 1.4 | 0.5 | 0.6 | 0.2 |
| 10197 | 021b01 | AV621962 | LC043c03  |   |   | 1168.8 | 459.4 | 769.9 | 0.4 | 0.1 | 0.6 | 0.2 |
| 10198 | 022c04 | AV623567 | LC065g03  |   |   | 44.4   | 29.4  | 47.8  | 0.6 | 0.1 | 0.6 | 0.2 |
| 10199 | 168f03 | BP096602 | MXL061f03 |   |   | 11.1   | 6.7   | 13.5  | 0.6 | 0.2 | 0.6 | 0.4 |
| 10200 | 126a08 | AV640974 | HCL025f03 |   |   | 49.9   | 35.6  | 65.6  | 0.7 | 0.0 | 0.6 | 0.2 |
| 10201 | 005f09 | AV387709 | CM027g05  |   |   | 11.8   | 8.0   | 13.8  | 0.7 | 0.1 | 0.6 | 0.1 |
| 10202 | 102b04 | AV394176 | CL19c04   |   |   | 15.3   | 10.5  | 25.1  | 0.7 | 0.2 | 0.6 | 0.5 |
| 10203 | 101h04 | AV394013 | CL16g08   |   |   | 24.0   | 17.7  | 33.5  | 0.7 | 0.0 | 0.6 | 0.2 |
| 10204 | 171e03 | BP097943 | MXL083h08 |   |   | 16.9   | 12.1  | 22.8  | 0.8 | 0.1 | 0.6 | 0.3 |
| 10205 | 128g04 | AV642505 | HCL053a03 |   |   | 12.7   | 9.8   | 18.8  | 0.8 | 0.1 | 0.6 | 0.2 |
| 10206 | 168g05 | BP096679 | MXL062h10 |   |   | 45.9   | 24.5  | 65.5  | 0.5 | 0.2 | 0.6 | 0.5 |
| 10207 | 035g12 | BP097430 | MXL075f01 |   |   | 5.3    | 8.1   | 13.6  | 1.6 | 0.7 | 0.6 | 0.2 |
| 10208 | 172f10 | BP098480 | MXL094a02 |   |   | 7.5    | 11.5  | 18.8  | 1.4 | 0.8 | 0.6 | 0.4 |
| 10209 | 160h01 | BP089326 | MX205b08  |   |   | 3.0    | 2.0   | 6.0   | 0.7 | 0.2 | 0.6 | 0.5 |
| 10210 | 163h01 | BP094527 | MXL024d12 |   |   | 6.6    | 5.1   | 9.6   | 0.8 | 0.4 | 0.6 | 0.3 |
| 10211 | 131c07 | AV644008 | HCL080b03 |   |   | 34.5   | 25.2  | 47.6  | 0.7 | 0.1 | 0.6 | 0.2 |
| 10212 | 124g07 | AV640272 | HCL013e02 |   |   | 26.3   | 20.3  | 38.6  | 0.8 | 0.1 | 0.6 | 0.3 |
| 10213 | 005f11 | AV387730 | CM028b01  |   |   | 35.3   | 14.7  | 25.3  | 0.4 | 0.1 | 0.6 | 0.1 |
| 10214 | 006h12 | AV390882 | CM048f10  |   |   | 8.5    | 9.4   | 16.2  | 1.1 | 0.2 | 0.6 | 0.2 |
| 10215 | 167g03 | BP096175 | MXL054a11 |   |   | 57.8   | 34.3  | 83.8  | 0.6 | 0.2 | 0.6 | 0.4 |
| 10216 | 168e08 | BP096569 | MXL060h09 |   |   | 15.0   | 11.1  | 19.1  | 0.8 | 0.1 | 0.6 | 0.0 |
| 10217 | 113h07 | AV388515 | CM071f03  |   |   | 32.9   | 16.6  | 28.8  | 0.6 | 0.4 | 0.6 | 0.2 |
| 10218 | 172d03 | BP098346 | MXL091h07 |   |   | 7.2    | 5.6   | 9.7   | 0.8 | 0.1 | 0.6 | 0.1 |
| 10219 | 118h07 | AV634387 | HC032g03  |   |   | 15.2   | 11.7  | 22.0  | 0.8 | 0.1 | 0.6 | 0.2 |
| 10220 | 161e08 | BP093211 | MXL005a07 |   |   | 24.9   | 20.9  | 38.3  | 0.8 | 0.1 | 0.6 | 0.1 |
| 10221 | 015h12 | AV641563 | HCL036d03 |   |   | 6.8    | 3.8   | 7.5   | 0.6 | 0.2 | 0.6 | 0.3 |
| 10222 | 157h10 | BP087303 | MX031c05  |   |   | 7.1    | 5.7   | 11.8  | 0.7 | 0.2 | 0.6 | 0.5 |
| 10223 | 035e07 | BP097103 | MXL070a11 |   |   | 13.7   | 6.7   | 11.6  | 0.5 | 0.1 | 0.6 | 0.1 |
| 10224 | 116e08 | AV393185 | CM100a12  |   |   | 28.0   | 10.4  | 18.9  | 0.5 | 0.3 | 0.6 | 0.2 |
| 10225 | 166f05 | BP095724 | MXL046d08 |   |   | 130.8  | 78.2  | 134.9 | 0.6 | 0.2 | 0.6 | 0.1 |
| 10226 | 130b07 | AV643271 | HCL066f05 |   |   | 19.3   | 13.8  | 25.1  | 0.7 | 0.1 | 0.6 | 0.1 |
| 10227 | 162g02 | BP093898 | MXL015c09 |   |   | 32.7   | 21.7  | 47.8  | 0.7 | 0.1 | 0.6 | 0.3 |
| 10228 | 103b07 | AV394869 | CL32c12   |   |   | 20.2   | 15.2  | 27.7  | 0.8 | 0.1 | 0.6 | 0.2 |
| 10229 | 130f07 | AV643627 | HCL073a07 |   |   | 31.9   | 19.8  | 40.4  | 0.6 | 0.0 | 0.6 | 0.3 |
| 10230 | 123e10 | AV639628 | HCL002b01 |   |   | 11.7   | 7.1   | 12.8  | 0.6 | 0.1 | 0.6 | 0.1 |
| 10231 | 141h11 | AV624816 | LC083b05  |   |   | 14.7   | 12.0  | 21.3  | 0.8 | 0.1 | 0.6 | 0.1 |
| 10232 | 018c08 | AV644409 | HCL088a07 |   |   | 10.8   | 6.8   | 12.4  | 0.6 | 0.1 | 0.6 | 0.2 |
| 10233 | 161e06 | BP093201 | MXL004h09 |   |   | 82.4   | 65.9  | 111.5 | 0.8 | 0.2 | 0.6 | 0.1 |
| 10234 | 170g08 | BP097592 | MXL078b10 |   |   | 10.3   | 6.2   | 16.4  | 0.6 | 0.3 | 0.6 | 0.5 |
| 10235 | 111f07 | AV390999 | CM049d03  |   |   | 72.6   | 39.3  | 67.1  | 0.5 | 0.2 | 0.6 | 0.2 |
| 10236 | 117d10 | AV632670 | HC011b05  |   |   | 8.2    | 5.9   | 10.3  | 0.7 | 0.2 | 0.6 | 0.1 |
| 10237 | 011c09 | AV634607 | HC035e07  |   |   | 22.9   | 11.0  | 21.6  | 0.5 | 0.1 | 0.6 | 0.3 |
| 10238 | 126g06 | AV641456 | HCL034a03 |   |   | 18.9   | 12.8  | 25.2  | 0.7 | 0.1 | 0.6 | 0.2 |
| 10239 | 134d01 | AV619204 | LC005b03  |   |   | 9.9    | 9.7   | 17.1  | 1.0 | 0.3 | 0.6 | 0.1 |
| 10240 | 030c02 | AV631486 | LCL094h02 |   |   | 26.8   | 10.8  | 19.0  | 0.4 | 0.2 | 0.6 | 0.2 |
| 10241 | 013c10 | AV638444 | HC086e01  |   |   | 28.0   | 15.7  | 28.5  | 0.6 | 0.1 | 0.6 | 0.2 |
| 10242 | 155g05 | AV631590 | LCL096e11 |   |   | 70.2   | 42.4  | 74.2  | 0.6 | 0.1 | 0.6 | 0.1 |
| 10243 | 104e11 | AV395893 | CL51e02   |   |   | 4.3    | 3.4   | 6.7   | 0.8 | 0.1 | 0.6 | 0.2 |
| 10244 | 170g12 | BP097607 | MXL078d10 |   |   | 17.0   | 11.7  | 30.0  | 0.6 | 0.3 | 0.6 | 0.5 |
| 10245 | 128h04 | AV642573 | HCL054a12 |   |   | 28.4   | 21.0  | 37.0  | 0.8 | 0.3 | 0.6 | 0.0 |
| 10246 | 156g07 | BP086336 | MX006g09  |   |   | 32.1   | 18.6  | 45.7  | 0.7 | 0.3 | 0.6 | 0.4 |
| 10247 | 032b04 | BP092979 | MXL001g03 |   |   | 21.2   | 10.7  | 19.6  | 0.5 | 0.1 | 0.6 | 0.2 |
| 10248 | 018f06 | AV619027 | LC002g07  |   |   | 42.5   | 22.8  | 40.5  | 0.6 | 0.2 | 0.6 | 0.2 |
| 10249 | 163g05 | BP094489 | MXL023h04 |   |   | 24.3   | 11.3  | 26.0  | 0.5 | 0.2 | 0.6 | 0.4 |
| 10250 | 124d08 | AV640137 | HCL011a08 |   |   | 17.6   | 11.0  | 19.6  | 0.6 | 0.2 | 0.6 | 0.1 |
| 10251 | 103a12 | AV395049 | CL31e09   |   |   | 9.6    | 10.2  | 22.2  | 1.1 | 0.2 | 0.6 | 0.3 |
| 10252 | 105e05 | AV396618 | CL64g05   |   |   | 8.7    | 6.3   | 11.6  | 0.7 | 0.1 | 0.6 | 0.1 |
| 10253 | 169g06 | BP097106 | MXL070b05 |   |   | 8.9    | 4.8   | 8.5   | 0.5 | 0.4 | 0.6 | 0.4 |
| 10254 | 162g07 | BP093917 | MXL015f01 |   |   | 42.7   | 20.0  | 51.7  | 0.5 | 0.3 | 0.6 | 0.4 |
| 10255 | 003e08 | AV396743 | CL66g05   |   |   | 5.0    | 5.9   | 11.3  | 1.3 | 0.7 | 0.6 | 0.3 |
| 10256 | 112b06 | AV391499 | CM054h08  |   |   | 8.9    | 6.5   | 12.9  | 0.7 | 0.1 | 0.6 | 0.2 |
| 10257 | 018g04 | AV619057 | LC003b08  |   |   | 116.6  | 60.7  | 114.0 | 0.6 | 0.4 | 0.6 | 0.3 |
| 10258 | 105b11 | AV397907 | CL59c04   |   |   | 8.8    | 7.8   | 17.0  | 0.9 | 0.1 | 0.6 | 0.2 |
| 10259 | 162g10 | BP093931 | MXL015g09 |   |   | 19.2   | 14.0  | 29.5  | 0.7 | 0.4 | 0.6 | 0.4 |
| 10260 | 110c08 | AV389105 | CM035b05  |   |   | 146.7  | 59.4  | 106.1 | 0.4 | 0.2 | 0.6 | 0.2 |
| 10261 | 163g07 | BP094496 | MXL024a06 |   |   | 5.0    | 4.5   | 8.7   | 0.9 | 0.7 | 0.6 | 0.4 |
| 10262 | 172d10 | BP098375 | MXL092d09 |   |   | 11.4   | 6.0   | 13.3  | 0.5 | 0.2 | 0.6 | 0.3 |
| 10263 | 166g09 | BP095761 | MXL047a05 |   |   | 14.6   | 7.4   | 15.0  | 0.5 | 0.4 | 0.6 | 0.5 |
| 10264 | 155e12 | AV631474 | LCL094f07 |   |   | 22.6   | 17.8  | 36.3  | 0.8 | 0.1 | 0.6 | 0.2 |
| 10265 | 166g02 | BP095738 | MXL046f03 |   |   | 39.9   | 41.4  | 83.1  | 1.3 | 1.0 | 0.6 | 0.4 |
| 10266 | 104c03 | AV395630 | CL46c04   |   |   | 53.0   | 19.2  | 34.3  | 0.4 | 0.0 | 0.6 | 0.1 |
| 10267 | 157e06 | BP086993 | MX022d04  |   |   | 12.9   | 12.3  | 25.9  | 1.  |     |     |     |

|       | A      | B        | C         | D | E | F     | G     | H     | I   | J   | K   | L   |
|-------|--------|----------|-----------|---|---|-------|-------|-------|-----|-----|-----|-----|
| 10270 | 103e11 | AV395183 | CL39a06   |   |   | 4.7   | 3.8   | 7.4   | 0.8 | 0.2 | 0.6 | 0.3 |
| 10271 | 106f02 | AV386523 | CM001h01  |   |   | 24.5  | 21.1  | 38.0  | 0.9 | 0.3 | 0.6 | 0.1 |
| 10272 | 168h07 | BP096733 | MXL063h09 |   |   | 8.3   | 5.0   | 10.5  | 0.6 | 0.3 | 0.6 | 0.4 |
| 10273 | 164f08 | BP094851 | MXL031b01 |   |   | 28.3  | 20.1  | 36.2  | 0.7 | 0.1 | 0.6 | 0.1 |
| 10274 | 161g09 | BP093330 | MXL006h10 |   |   | 37.0  | 19.8  | 46.8  | 0.6 | 0.4 | 0.5 | 0.4 |
| 10275 | 162h10 | BP094002 | MXL016g11 |   |   | 10.4  | 7.5   | 17.1  | 0.6 | 0.2 | 0.5 | 0.5 |
| 10276 | 137g06 | AV621862 | LC041h07  |   |   | 20.5  | 18.7  | 34.2  | 1.0 | 0.3 | 0.5 | 0.0 |
| 10277 | 106b06 | AV397086 | CL75c11   |   |   | 11.9  | 8.4   | 15.9  | 0.7 | 0.1 | 0.5 | 0.1 |
| 10278 | 118b09 | AV633537 | HC021h11  |   |   | 10.1  | 6.1   | 12.2  | 0.6 | 0.1 | 0.5 | 0.2 |
| 10279 | 032d05 | BP093228 | MXL005c10 |   |   | 23.6  | 14.0  | 25.5  | 0.6 | 0.1 | 0.5 | 0.0 |
| 10280 | 025d06 | AV627315 | LCL024h04 |   |   | 16.7  | 9.3   | 17.1  | 0.6 | 0.1 | 0.5 | 0.2 |
| 10281 | 155g06 | AV631591 | LCL096e12 |   |   | 6.3   | 5.4   | 9.8   | 0.9 | 0.4 | 0.5 | 0.1 |
| 10282 | 167h08 | BP096240 | MXL055b06 |   |   | 10.0  | 5.7   | 10.8  | 0.6 | 0.1 | 0.5 | 0.2 |
| 10283 | 030g03 | BP086124 | MX002c11  |   |   | 19.7  | 25.4  | 46.5  | 1.3 | 0.6 | 0.5 | 0.0 |
| 10284 | 172g07 | BP098529 | MXL094g05 |   |   | 16.1  | 11.4  | 30.3  | 0.7 | 0.5 | 0.5 | 0.5 |
| 10285 | 019c06 | AV619875 | LC013b05  |   |   | 16.9  | 9.6   | 18.2  | 0.6 | 0.1 | 0.5 | 0.1 |
| 10286 | 003d07 | AV396428 | CL62a05   |   |   | 10.4  | 9.4   | 18.1  | 0.9 | 0.1 | 0.5 | 0.2 |
| 10287 | 107g07 | AV387173 | CM012f05  |   |   | 119.8 | 56.6  | 100.7 | 0.5 | 0.2 | 0.5 | 0.1 |
| 10288 | 001f09 | AV394177 | CL19d04   |   |   | 4.0   | 2.7   | 5.0   | 0.7 | 0.0 | 0.5 | 0.1 |
| 10289 | 015h07 | AV641521 | HCL035c05 |   |   | 14.7  | 22.3  | 41.4  | 1.9 | 1.3 | 0.5 | 0.2 |
| 10290 | 169h03 | BP097145 | MXL070h02 |   |   | 14.0  | 8.7   | 16.7  | 0.6 | 0.2 | 0.5 | 0.3 |
| 10291 | 160h12 | BP089431 | MX207b08  |   |   | 5.1   | 5.1   | 9.6   | 1.0 | 0.2 | 0.5 | 0.1 |
| 10292 | 161h10 | BP093387 | MXL007g02 |   |   | 9.3   | 6.1   | 12.5  | 0.7 | 0.2 | 0.5 | 0.3 |
| 10293 | 118b06 | AV633486 | HC021d04  |   |   | 52.2  | 25.8  | 47.5  | 0.5 | 0.1 | 0.5 | 0.2 |
| 10294 | 166h07 | BP095812 | MXL047g08 |   |   | 4.5   | 4.4   | 9.9   | 0.8 | 0.3 | 0.5 | 0.5 |
| 10295 | 171h07 | BP098152 | MXL088c10 |   |   | 20.8  | 12.0  | 25.2  | 0.6 | 0.4 | 0.5 | 0.4 |
| 10296 | 165g12 | BP095355 | MXL040e03 |   |   | 28.3  | 17.9  | 33.8  | 0.6 | 0.1 | 0.5 | 0.1 |
| 10297 | 171d10 | BP097932 | MXL083g04 |   |   | 16.3  | 8.9   | 16.9  | 0.5 | 0.2 | 0.5 | 0.2 |
| 10298 | 107b05 | AV386831 | CM007c09  |   |   | 117.4 | 44.4  | 83.1  | 0.4 | 0.1 | 0.5 | 0.1 |
| 10299 | 170h08 | BP097656 | MXL079b07 |   |   | 186.2 | 81.0  | 154.0 | 0.4 | 0.0 | 0.5 | 0.1 |
| 10300 | 102c12 | AV394289 | CL20h07   |   |   | 16.1  | 13.6  | 29.0  | 0.9 | 0.1 | 0.5 | 0.2 |
| 10301 | 156h07 | BP086413 | MX008c07  |   |   | 21.6  | 11.4  | 23.5  | 0.6 | 0.3 | 0.5 | 0.3 |
| 10302 | 170e02 | BP097434 | MXL075f08 |   |   | 38.9  | 28.0  | 62.4  | 0.8 | 0.2 | 0.5 | 0.3 |
| 10303 | 103b11 | AV394867 | CL32h07   |   |   | 13.6  | 10.8  | 22.2  | 0.8 | 0.1 | 0.5 | 0.2 |
| 10304 | 033b04 | BP094107 | MXL018c07 |   |   | 7.9   | 4.9   | 10.2  | 0.6 | 0.2 | 0.5 | 0.2 |
| 10305 | 018f08 | AV619034 | LC002h03  |   |   | 16.6  | 13.5  | 28.8  | 1.4 | 1.3 | 0.5 | 0.3 |
| 10306 | 132f08 | AV644786 | HCL093g05 |   |   | 23.6  | 13.5  | 31.0  | 0.6 | 0.1 | 0.5 | 0.3 |
| 10307 | 115h07 | AV391761 | CM093c06  |   |   | 217.7 | 116.2 | 230.9 | 0.5 | 0.1 | 0.5 | 0.2 |
| 10308 | 123e11 | AV639629 | HCL002b02 |   |   | 22.0  | 14.7  | 31.4  | 0.7 | 0.1 | 0.5 | 0.2 |
| 10309 | 172f02 | BP098445 | MXL093d09 |   |   | 21.0  | 12.6  | 27.8  | 0.5 | 0.3 | 0.5 | 0.4 |
| 10310 | 155d07 | AV631413 | LCL093e04 |   |   | 20.5  | 7.1   | 15.7  | 0.3 | 0.1 | 0.5 | 0.2 |
| 10311 | 023c10 | AV624939 | LC084g10  |   |   | 652.3 | 293.5 | 515.9 | 0.4 | 0.2 | 0.5 | 0.3 |
| 10312 | 112c05 | AV391655 | CM055f05  |   |   | 153.7 | 70.5  | 139.9 | 0.5 | 0.1 | 0.5 | 0.2 |
| 10313 | 034c10 | BP095639 | MXL045a10 |   |   | 58.1  | 33.9  | 83.7  | 0.6 | 0.1 | 0.5 | 0.3 |
| 10314 | 169b10 | BP096864 | MXL066a12 |   |   | 63.4  | 17.8  | 42.2  | 0.3 | 0.1 | 0.5 | 0.3 |
| 10315 | 110d09 | AV389312 | CM036a09  |   |   | 24.2  | 12.4  | 25.0  | 0.5 | 0.1 | 0.5 | 0.1 |
| 10316 | 161g10 | BP093339 | MXL007a12 |   |   | 24.4  | 13.1  | 32.1  | 0.5 | 0.3 | 0.5 | 0.4 |
| 10317 | 101b03 | AV397592 | CL02a01   |   |   | 23.3  | 24.7  | 52.3  | 1.3 | 0.8 | 0.5 | 0.1 |
| 10318 | 105b07 | AV396230 | CL58f08   |   |   | 7.6   | 5.6   | 12.7  | 0.7 | 0.1 | 0.5 | 0.2 |
| 10319 | 167h07 | BP096239 | MXL055b05 |   |   | 39.6  | 18.1  | 37.3  | 0.5 | 0.2 | 0.5 | 0.1 |
| 10320 | 115f01 | AV391173 | CM089e12  |   |   | 260.0 | 106.3 | 249.6 | 0.4 | 0.1 | 0.5 | 0.3 |
| 10321 | 169g10 | BP097121 | MXL070e01 |   |   | 4.5   | 4.3   | 9.1   | 0.9 | 0.2 | 0.5 | 0.4 |
| 10322 | 107f07 | AV386944 | CM011c11  |   |   | 13.4  | 9.2   | 20.0  | 0.7 | 0.1 | 0.5 | 0.2 |
| 10323 | 155h09 | AV631652 | LCL097f02 |   |   | 13.7  | 7.1   | 24.4  | 0.5 | 0.4 | 0.5 | 0.5 |
| 10324 | 003e10 | AV396715 | CL67g12   |   |   | 9.3   | 3.9   | 8.0   | 0.4 | 0.1 | 0.5 | 0.1 |
| 10325 | 156e09 | BP086193 | MX003g04  |   |   | 86.4  | 52.7  | 101.1 | 0.6 | 0.3 | 0.5 | 0.2 |
| 10326 | 008h06 | AV389767 | CM080a07  |   |   | 28.6  | 14.9  | 30.7  | 0.6 | 0.2 | 0.5 | 0.1 |
| 10327 | 140h06 | AV624129 | LC073c12  |   |   | 12.2  | 7.4   | 15.3  | 0.6 | 0.1 | 0.5 | 0.0 |
| 10328 | 156g10 | BP086352 | MX007b04  |   |   | 32.6  | 19.6  | 46.2  | 0.6 | 0.2 | 0.5 | 0.2 |
| 10329 | 168g12 | BP096709 | MXL063e03 |   |   | 30.7  | 20.6  | 53.5  | 0.7 | 0.1 | 0.5 | 0.3 |
| 10330 | 113d09 | AV393115 | CM067g02  |   |   | 538.1 | 215.3 | 447.9 | 0.4 | 0.1 | 0.5 | 0.1 |
| 10331 | 170h04 | BP097629 | MXL078g02 |   |   | 5.5   | 3.3   | 8.3   | 0.5 | 0.2 | 0.5 | 0.4 |
| 10332 | 159h10 | BP088219 | MX054d03  |   |   | 4.5   | 3.3   | 7.8   | 0.7 | 0.2 | 0.5 | 0.4 |
| 10333 | 162h09 | BP094001 | MXL016g10 |   |   | 17.7  | 9.0   | 21.4  | 0.5 | 0.3 | 0.5 | 0.3 |
| 10334 | 102d10 | AV394255 | CL22c12   |   |   | 16.3  | 10.9  | 24.4  | 0.7 | 0.2 | 0.5 | 0.2 |
| 10335 | 112g10 | AV392317 | CM060g07  |   |   | 43.8  | 26.6  | 62.1  | 0.6 | 0.2 | 0.5 | 0.2 |
| 10336 | 159g03 | BP088024 | MX049f12  |   |   | 50.1  | 18.5  | 38.8  | 0.4 | 0.0 | 0.5 | 0.0 |
| 10337 | 172g10 | BP098539 | MXL095a09 |   |   | 18.8  | 10.7  | 27.8  | 0.5 | 0.2 | 0.5 | 0.4 |
| 10338 | 031d12 | BP086897 | MX019g04  |   |   | 82.8  | 34.6  | 79.9  | 0.4 | 0.3 | 0.5 | 0.3 |
| 10339 | 101d10 | AV393528 | CL08a10   |   |   | 16.1  | 12.1  | 28.9  | 0.8 | 0.1 | 0.5 | 0.2 |
| 10340 | 024g03 | AV626794 | LCL015e08 |   |   | 68.1  | 97.2  | 241.6 | 1.4 | 0.1 | 0.5 | 0.1 |
| 10341 | 172e03 | BP098401 | MXL092g08 |   |   | 20.5  | 16.0  | 34.0  | 0.8 | 0.3 | 0.5 | 0.1 |
| 10342 | 157h04 | BP087224 | MX028d04  |   |   | 57.9  | 33.9  | 74.1  | 0.6 | 0.0 | 0.5 | 0.0 |
| 10343 | 156g09 | BP086351 | MX007b03  |   |   | 32.6  | 11.1  | 24.5  | 0.3 | 0.0 | 0.5 | 0.0 |
| 10344 | 112f10 | AV392205 | CM059b05  |   |   | 19.0  | 12.1  | 29.6  | 0.6 | 0.1 | 0.4 | 0.2 |
| 10345 | 160h02 | BP089350 | MX205f02  |   |   | 18.0  | 8.1   | 19.8  | 0.5 | 0.1 | 0.4 | 0.2 |
| 10346 | 172g09 | BP098534 | MXL094h05 |   |   | 31.0  | 16.0  | 54.8  | 0.5 | 0.3 | 0.4 | 0.4 |
| 10347 | 030h12 | BP086325 | MX006e12  |   |   | 6.0   | 7.3   | 16.9  | 1.2 | 0.1 | 0.4 | 0.1 |
| 10348 | 162f05 | BP093848 | MXL014f07 |   |   | 8.1   | 8.2   | 18.5  | 1.1 | 0.4 | 0.4 | 0.1 |
| 10349 | 005g07 | AV388393 | CM029d03  |   |   | 32.9  | 14.3  | 31.3  | 0.5 | 0.3 | 0.4 | 0.2 |
| 10350 | 169h05 | BP097150 | MXL070h08 |   |   | 49.8  | 18.9  | 47.0  | 0.4 | 0.1 | 0.4 | 0.3 |
| 10351 | 169g07 | BP097113 | MXL070c11 |   |   | 32.5  | 10.4  | 23.9  | 0.3 | 0.1 | 0.4 | 0.1 |
| 10352 | 157h09 | BP087294 | MX031a03  |   |   | 51.3  | 23.7  | 57.0  | 0.4 | 0.2 | 0.4 | 0.3 |
| 10353 | 131c04 | AV643976 | HCL079e04 |   |   | 32.3  | 22.6  | 52.8  | 0.7 | 0.1 | 0.4 | 0.0 |
| 10354 | 159g08 | BP088096 | MX051d10  |   |   | 15.2  | 8.1   | 18.2  | 0.5 | 0.3 | 0.4 | 0.2 |
| 10355 | 006f09 | AV390274 | CM044h09  |   |   | 6.4   | 4.2   | 9.7   | 0.7 | 0.2 | 0.4 | 0.1 |
| 10356 | 165d02 | BP095781 | MXL047c10 |   |   | 31.3  | 9.8   | 22.5  | 0.3 | 0.1 | 0.4 | 0.2 |
| 10357 | 118b05 | AV633473 | HC021c02  |   |   | 148.5 | 44.7  | 108.2 | 0.3 | 0.1 | 0.4 | 0.1 |
| 10358 | 004f08 | AV387133 | CM012b08  |   |   | 27.1  | 14.9  | 35.0  | 0.5 | 0.1 | 0.4 | 0.1 |
| 10359 | 002f09 | BP092828 | MX259f12  |   |   | 216.5 | 90.6  | 219.0 | 0.4 | 0.1 | 0.4 | 0.1 |
| 10360 | 005h08 | AV388720 | CM031f06  |   |   | 714.8 | 308.7 | 789.0 | 0.5 | 0.2 | 0.4 | 0.1 |
| 10361 | 162g09 | BP093928 | MXL015g05 |   |   | 57.5  | 18.6  | 56.3  | 0.4 | 0.2 | 0.4 | 0.2 |
| 10362 | 149b05 | AV628361 | LCL040f01 |   |   | 92.3  | 47.5  | 127.9 | 0.5 | 0.0 | 0.4 | 0.1 |
| 10363 | 002h08 | AV395944 | CL51f03   |   |   | 29.7  | 11.8  | 31.2  | 0.4 | 0.1 | 0.4 | 0.1 |
| 10364 | 157g10 | BP087165 | MX027a10  |   |   | 16.6  | 4.9   | 14.0  | 0.3 | 0.1 | 0.4 | 0.0 |
| 10365 | 162c11 | BP093662 | MXL011f06 |   |   | 2.9   | 4.0   | 11.9  | 1.5 | 0.4 | 0.4 | 0.1 |
| 10366 | 003f09 | AV396873 | CL71d10   |   |   | 5.5   | 8.1   | 21.9  | 1.7 | 1.3 | 0.4 | 0.1 |
| 10367 | 170h07 | BP097647 | MXL079a01 |   |   | 892.5 | 241.9 | 755.8 | 0.3 | 0.1 | 0.3 | 0.0 |
| 10368 | 157h02 | BP087178 | MX027d12  |   |   | 200.9 | 70.1  | 231.8 | 0.3 | 0.0 | 0.3 | 0.1 |
| 10369 | 163h09 | BP094557 | MXL024h09 |   |   | 51.6  | 14.6  | 49.2  | 0.3 | 0.0 | 0.3 | 0.0 |
| 10370 | 013e12 | AV638908 | HC092d11  |   |   | 14.0  | 6.6   | 33.9  | 0.5 | 0.1 | 0.2 | 0.1 |
